# Supplementary material for: Compositional Shift of Bacterial, Archaeal, and Fungal Communities Is Dependent on Trophic Lifestyles in Rice Paddy Soil
Source: Front Microbiol. 2021 Sep 1;12:719486. doi: 10.3389/fmicb.2021.719486 (PMC8440912; doi:10.3389/fmicb.2021.719486)
Supplement: Supplementary file 1 [file Data_Sheet_1.zip]

Archive with 14 entries (14 files):
- Table 1.XLSX
- Table 10.XLSX
- Table 11.XLSX
- Table 12.XLSX
- Table 13.XLSX
- Table 2.XLSX
- Table 3.XLSX
- Table 4.XLSX
- Table 5.XLSX
- Table 6.XLSX
- Table 7.XLSX
- Table 8.XLSX
- Table 9.XLSX
- Data Sheet 1.pdf
