# Supplementary material for: Compositional Shift of Bacterial, Archaeal, and Fungal Communities Is Dependent on Trophic Lifestyles in Rice Paddy Soil
Source: Front Microbiol. 2021 Sep 1;12:719486. doi: 10.3389/fmicb.2021.719486 (PMC8440912; doi:10.3389/fmicb.2021.719486)
Supplement: Supplementary file 1 [file Data_Sheet_1.zip › Table 1.XLSX]

## Sheet: Content
Supplementary Table 1. Soil properties of paddy fields investigated in this study
Sheet	Content
Soil properties	Soil properties of rice paddies examined in this study
pH	Pairwise comparison of pH at the field level
SOM	Pairwise comparison of SOM at the field level
TN	Pairwise comparison of TN at the field level
CEC	Pairwise comparison of CEC at the field level
Ca	Pairwise comparison of Ca at the field level
Mg	Pairwise comparison of Mg at the field level
K	Pairwise comparison of K at the field level
Na	Pairwise comparison of Na at the field level
P2O5	Pairwise comparison of P2O5 at the field level
Sand	Pairwise comparison of Sand at the field level
Silt	Pairwise comparison of Silt at the field level
Clay	Pairwise comparison of Clay at the field level

## Sheet: Soil properties
Supplementary Table S1. Soil properties of paddy fields investigated in this study
Location	Latitude	Longitude	Field	Sampling year	Temperature (℃)	Humidity (%)	pH	SOM1 (%)	TN2 (%)	CEC3 (cmol/kg)	Ca (mg/kg)	Mg (mg/kg)	K (mg/kg)	Na (mg/kg)	P2O5 (mg/kg)	Sand (%)	Silt (%)	Clay (%)	Soil texture	Cultural practice
Chuncheon	37.9041	127.734	CC1	2017	17.7	43	5.9	3.38	0.15	15.13	885.53	39.61	105.06	24.25	271.08	44.36	42.84	12.8	Loam	Conventional
	37.9046	127.734	CC2				5.2	3.29	0.147	17.05	648.7	39.51	71.85	29.94	206.24	33.32	50.04	16.64	Silt loam	No pesticide
Cheongju	36.7235	127.465	CJ1		15.7	44	5.8	2.24	0.106	6.63	606.38	62.52	29.74	55.53	25.59	69.76	17.64	12.6	Sandy loam	No fertilizer
	36.723	127.465	CJ2				6	2.51	0.116	13.02	815.02	128.74	83.12	72.84	7.14	60.56	21.88	17.56	Sandy loam	No pesticide
Daegu	35.9491	128.563	DG1		20.3	28	5.4	5.04	0.259	15.92	1138.02	84.77	101.4	39.17	23.47	47.04	29.24	23.72	Loam	Conventional
	35.9493	128.563	DG2				5.7	5.21	0.296	16.06	1216.62	118.12	139.13	40.3	48.94	41.88	34.48	23.64	Loam	No pesticide
Jinju	35.2075	128.117	JJ1		16.2	35	6.6	2.33	0.107	20.14	1572.13	143.3	171.5	87.37	38.26	16.04	61.72	22.24	Silt loam	Conventional
	35.2075	128.119	JJ2				6.1	3.19	0.144	14.88	1255.67	125.4	113.03	66.85	148.14	30.48	49.2	20.32	Loam	No pesticide
Miryang	35.4939	128.74	MY1		16.8	50	5.5	4.38	0.238	16.21	1127.26	136.64	75.13	43.14	84.05	9.52	59.88	30.6	Silt clay loam	Conventional
	35.4939	128.74	MY2				5.2	3.55	0.204	15.08	910.92	89.76	48.37	39.21	16.79	12.08	56.72	31.2	Silt clay loam	No fertilizer
Naju	35.0247	126.823	NJ1		15.6	45	6	2.98	0.176	19.21	1374.62	288.36	113.07	48.34	7.04	10.08	52.2	37.72	Silt clay loam	Conventional
	35.0245	126.824	NJ2				5.5	3.47	0.2	19.11	1164.13	165.97	93.47	48.98	12.83	16.56	47.92	35.52	Silt clay loam	No fertilizer
Iksan	35.9376	126.991	IS1		16.3	39	5.4	5.36	0.243	22.99	1307.82	204.96	93.58	60.06	14.19	7	42	51	Silty Clay	Conventional
	35.9378	126.993	IS2				5.4	4.95	0.242	22.55	1229.19	173.86	99.45	58.57	29.88	5.68	49.24	45.08	Silty Clay	No pesticide
Yesan	36.738	126.82	YS1		18.3	30	5.2	1.82	0.093	13.61	609.79	113.95	113.71	32.4	9.16	49.04	28.96	22	Loam	No fertilizer
	36.7368	126.819	YS2				6.1	4.03	0.187	17.73	1292.08	124.58	201.93	68.38	51.8	32.32	38.56	29.12	Clay loam	No pesticide
University Farm (Suwon)	37.2686	126.99	UF1		21.5	24	5.7	4.86	0.287	18.96	945.12	86.28	99.91	48.33	49.34	37.6	36.8	25.6	Loam	Conventional
	37.2687	126.99	UF2				6.3	2.3	0.108	13.46	1030.12	85.87	91.81	51.12	17.91	36	39.48	24.52	Loam	Conventional
Chuncheon	37.9041	127.734	CC1.18	2018	12.7	50	5.9	3.21	0.154	14.05	617.02	32.39	89	25.92	257.23	47.52	43	9.48	Loam	Conventional
							6	3.1	0.136	14.69	846.38	43.05	119.31	27.72	299.1	46.84	42.32	10.84
							6.1	2.82	0.148	14.59	744.47	36.8	109.45	18.7	256.39	44.8	44.36	10.84
	37.9046	127.734	CC2.18				5.6	3.07	0.151	16.16	538.4	40.94	64.5	25.01	202.59	36.48	49.6	13.92	Loam	No pesticide
							5.7	2.91	0.142	17.29	650.4	46.28	63	26.86	200.29	37.64	48.24	14.12
							5.8	2.95	0.145	15.43	561.55	41.05	48.91	21.97	201.34	37.48	49.92	12.6
Cheongju	36.7235	127.465	CJ1.18		15.8	41	6.4	1.68	0.096	5.11	432.54	49.17	17.6	32.1	21.48	76.72	15.84	7.44	Sandy loam	No fertilizer
							6.3	1.57	0.093	6.29	630.42	70.07	25.24	50.19	29.22	73.4	17.6	9
							5.7	2.09	0.115	6.53	541.11	56.48	26.98	30.45	24.91	71.24	19.2	9.56
	36.723	127.465	CJ2.18				5.8	2.45	0.116	11.54	608.83	109.76	74.32	48.39	6.82	63.6	21.88	14.52	Sandy loam	No pesticide
							6	2.32	0.119	11.74	750.74	141	74.18	63.12	5.31	64.8	20.84	14.36
							6.2	2.1	0.111	11.79	703.43	155.23	67.91	62.72	5.81	65.2	21.04	13.76
Daegu	35.9491	128.563	DG1.18		20.8	26	5.4	4.12	0.244	13.56	898.39	82.31	80.44	41.25	33.89	45.48	36.04	18.48	Loam	Conventional
							5.2	4.14	0.254	16.7	1026.48	92.77	98.69	36.03	39.89	34.28	43.56	22.16
							5.2	4.24	0.238	12.82	788.44	72.84	87.35	26.5	48.62	50.6	31.44	17.96
	35.9493	128.563	DG2.18				5.9	4.73	0.274	15.52	1307.26	126.69	124.74	36.37	48.74	36.64	41.32	22.04	Loam	No pesticide
							5.6	4.57	0.292	16.06	1190.26	122.88	103.96	38.13	37.99	32.88	43.76	23.36
							6.1	4.22	0.272	15.03	1236.03	125.89	109.23	33.82	36.26	35.28	41.04	23.68
Iksan	35.9376	126.991	IS1.18		16.2	49	5.2	4.75	0.261	25.05	1315.19	201.49	97.92	68.67	16.61	3.76	46.44	49.8	Silty Clay	Conventional
							5.2	4.7	0.234	23.43	1261.83	188.97	75.49	58.02	25.61	4.24	44.44	51.32
							5.4	4.41	0.227	23.92	1249.75	201.53	86.52	49.88	25.73	3.88	46.04	50.08
	35.9378	126.993	IS2.18				5.2	4.67	0.237	21.61	1051.9	165.23	165.07	43.74	23.56	6.52	52.36	41.12	Silty Clay	No pesticide
							5.5	3.86	0.208	21.07	1186.76	220.48	95.33	48.43	52.07	3.68	52.6	43.72
							5.6	4.43	0.225	22.5	1226.94	212.01	117.54	54.56	30.09	2.72	54.12	43.16
University Farm (Suwon)	37.2686	126.99	UF1.18		18.6	20	6.3	2.04	0.116	14.34	1124.13	121.22	113.18	51.35	22.11	41.32	38.04	20.64	Loam	Conventional
							6	2.19	0.121	14.74	1079.17	120.76	115.14	50.33	12.27	32.44	44.72	22.84
							6.2	2.3	0.116	13.02	941.27	101.28	114.88	43.18	26.68	43.28	37.92	18.8
	37.2687	126.99	UF2.18				6.8	1.81	0.103	12.43	941	100.11	82.54	44.86	30.71	45.24	34.32	20.44	Loam	Conventional
							6.3	2.04	0.114	13.31	904.04	96.92	94.26	45.73	25.72	41.24	38.24	20.52
							6.1	2.04	0.116	12.92	841.93	86.47	97.5	42.29	23.67	46.08	35.28	18.64
1SOM, soil organic matters
2TN, total nitrogen
3CEC, Cation exchange capacity

## Sheet: pH
Comparison	Z	P.unadj	P.adj
CC1 - CC1.18	-0.673302	0.500755	0.582416
CC1 - CC2	3.82026	0.000133311	0.000553755
CC1.18 - CC2	4.49356	7.00416e-06	4.81377e-05
CC1 - CC2.18	0.98068	0.326751	0.433375
CC1.18 - CC2.18	1.65398	0.0981311	0.164131
CC2 - CC2.18	-2.83958	0.0045173	0.0121102
CC1 - CJ1	0.43911	0.660582	0.727988
CC1.18 - CJ1	1.11241	0.265961	0.377944
CC2 - CJ1	-3.38115	0.000721833	0.00241463
CC2.18 - CJ1	-0.541569	0.588115	0.655774
CC1 - CJ1.18	-1.25878	0.208109	0.299107
CC1.18 - CJ1.18	-0.58548	0.558225	0.631763
CC2 - CJ1.18	-5.07904	3.79342e-07	4.62552e-06
CC2.18 - CJ1.18	-2.23946	0.0251258	0.0499872
CJ1 - CJ1.18	-1.69789	0.0895279	0.152439
CC1 - CJ2	-0.614754	0.538717	0.613358
CC1.18 - CJ2	0.058548	0.953312	0.992705
CC2 - CJ2	-4.43501	9.20663e-06	5.70509e-05
CC2.18 - CJ2	-1.59543	0.110615	0.177926
CJ1 - CJ2	-1.05386	0.291945	0.398394
CJ1.18 - CJ2	0.644028	0.519557	0.595129
CC1 - CJ2.18	-0.687939	0.491491	0.573406
CC1.18 - CJ2.18	-0.014637	0.988322	1
CC2 - CJ2.18	-4.5082	6.53802e-06	4.75264e-05
CC2.18 - CJ2.18	-1.66862	0.0951929	0.159924
CJ1 - CJ2.18	-1.12705	0.259721	0.370471
CJ1.18 - CJ2.18	0.570843	0.568106	0.637223
CJ2 - CJ2.18	-0.073185	0.941659	0.988742
CC1 - DG1	2.72248	0.00647932	0.016113
CC1.18 - DG1	3.39579	0.000684318	0.00235156
CC2 - DG1	-1.09778	0.272302	0.374292
CC2.18 - DG1	1.7418	0.0815427	0.14471
CJ1 - DG1	2.28337	0.0224084	0.0457858
CJ1.18 - DG1	3.98127	6.8549e-05	0.000301297
CJ2 - DG1	3.33724	0.000846154	0.00260037
CJ2.18 - DG1	3.41042	0.000648621	0.00229139
CC1 - DG1.18	3.45433	0.000551653	0.00204436
CC1.18 - DG1.18	4.12764	3.6651e-05	0.000182291
CC2 - DG1.18	-0.365925	0.714421	0.771575
CC2.18 - DG1.18	2.47365	0.0133739	0.0297372
CJ1 - DG1.18	3.01522	0.00256789	0.0070338
CJ1.18 - DG1.18	4.71312	2.43956e-06	2.04923e-05
CJ2 - DG1.18	4.06909	4.71974e-05	0.000217568
CJ2.18 - DG1.18	4.14227	3.43879e-05	0.000191157
DG1 - DG1.18	0.73185	0.46426	0.550126
CC1 - DG2	1.00995	0.312517	0.420397
CC1.18 - DG2	1.68326	0.0923255	0.155799
CC2 - DG2	-2.81031	0.00494944	0.0127271
CC2.18 - DG2	0.029274	0.976646	1
CJ1 - DG2	0.570843	0.568106	0.639119
CJ1.18 - DG2	2.26874	0.0232844	0.0468164
CJ2 - DG2	1.62471	0.104225	0.169814
CJ2.18 - DG2	1.69789	0.0895279	0.153129
DG1 - DG2	-1.71253	0.086799	0.149817
DG1.18 - DG2	-2.44438	0.0145101	0.031522
CC1 - DG2.18	0.029274	0.976646	1
CC1.18 - DG2.18	0.702576	0.48232	0.564448
CC2 - DG2.18	-3.79099	0.000150051	0.000603395
CC2.18 - DG2.18	-0.951406	0.341398	0.444995
CJ1 - DG2.18	-0.409836	0.681926	0.749326
CJ1.18 - DG2.18	1.28806	0.197726	0.285269
CJ2 - DG2.18	0.644028	0.519557	0.596938
CJ2.18 - DG2.18	0.717213	0.473242	0.555545
DG1 - DG2.18	-2.69321	0.00707677	0.0172582
DG1.18 - DG2.18	-3.42506	0.000614663	0.00223406
DG2 - DG2.18	-0.98068	0.326751	0.434901
CC1 - IS1	2.72248	0.00647932	0.0162198
CC1.18 - IS1	3.39579	0.000684318	0.00237314
CC2 - IS1	-1.09778	0.272302	0.375658
CC2.18 - IS1	1.7418	0.0815427	0.145392
CJ1 - IS1	2.28337	0.0224084	0.0460346
CJ1.18 - IS1	3.98127	6.8549e-05	0.000304841
CJ2 - IS1	3.33724	0.000846154	0.00262169
CJ2.18 - IS1	3.41042	0.000648621	0.00231301
DG1 - IS1	0	1	1
DG1.18 - IS1	-0.73185	0.46426	0.551856
DG2 - IS1	1.71253	0.086799	0.150505
DG2.18 - IS1	2.69321	0.00707677	0.0173703
CC1 - IS1.18	3.45433	0.000551653	0.0020646
CC1.18 - IS1.18	4.12764	3.6651e-05	0.000184721
CC2 - IS1.18	-0.365925	0.714421	0.773785
CC2.18 - IS1.18	2.47365	0.0133739	0.0299132
CJ1 - IS1.18	3.01522	0.00256789	0.00708514
CJ1.18 - IS1.18	4.71312	2.43956e-06	2.0958e-05
CJ2 - IS1.18	4.06909	4.71974e-05	0.000220254
CJ2.18 - IS1.18	4.14227	3.43879e-05	0.00019401
DG1 - IS1.18	0.73185	0.46426	0.553597
DG1.18 - IS1.18	0	1	1
DG2 - IS1.18	2.44438	0.0145101	0.0317042
DG2.18 - IS1.18	3.42506	0.000614663	0.00225575
IS1 - IS1.18	0.73185	0.46426	0.555349
CC1 - IS2	2.72248	0.00647932	0.0163279
CC1.18 - IS2	3.39579	0.000684318	0.00239511
CC2 - IS2	-1.09778	0.272302	0.377034
CC2.18 - IS2	1.7418	0.0815427	0.146081
CJ1 - IS2	2.28337	0.0224084	0.0462861
CJ1.18 - IS2	3.98127	6.8549e-05	0.00030847
CJ2 - IS2	3.33724	0.000846154	0.00264336
CJ2.18 - IS2	3.41042	0.000648621	0.00233504
DG1 - IS2	0	1	1
DG1.18 - IS2	-0.73185	0.46426	0.557112
DG2 - IS2	1.71253	0.086799	0.151198
DG2.18 - IS2	2.69321	0.00707677	0.0174838
IS1 - IS2	0	1	1
IS1.18 - IS2	-0.73185	0.46426	0.558886
CC1 - IS2.18	2.41511	0.0157306	0.0332188
CC1.18 - IS2.18	3.08841	0.00201231	0.00567652
CC2 - IS2.18	-1.40515	0.159976	0.233478
CC2.18 - IS2.18	1.43443	0.15145	0.227176
CJ1 - IS2.18	1.976	0.0481552	0.0919326
CJ1.18 - IS2.18	3.67389	0.000238886	0.000921418
CJ2 - IS2.18	3.02986	0.00244666	0.00680028
CJ2.18 - IS2.18	3.10305	0.0019154	0.00544376
DG1 - IS2.18	-0.307377	0.758556	0.809984
DG1.18 - IS2.18	-1.03923	0.298699	0.404689
DG2 - IS2.18	1.40515	0.159976	0.234383
DG2.18 - IS2.18	2.38583	0.0170405	0.0353918
IS1 - IS2.18	-0.307377	0.758556	0.812278
IS1.18 - IS2.18	-1.03923	0.298699	0.406144
IS2 - IS2.18	-0.307377	0.758556	0.814586
CC1 - JJ1	-2.72248	0.00647932	0.0164375
CC1.18 - JJ1	-2.04918	0.0404444	0.0783999
CC2 - JJ1	-6.54274	6.04004e-11	7.61045e-09
CC2.18 - JJ1	-3.70316	0.000212928	0.000829759
CJ1 - JJ1	-3.16159	0.00156908	0.00449328
CJ1.18 - JJ1	-1.4637	0.143276	0.217503
CJ2 - JJ1	-2.10773	0.0350544	0.0683019
CJ2.18 - JJ1	-2.03454	0.0418967	0.0808009
DG1 - JJ1	-5.44497	5.18148e-08	1.08811e-06
DG1.18 - JJ1	-6.17682	6.54063e-10	4.94472e-08
DG2 - JJ1	-3.73244	0.000189636	0.000746691
DG2.18 - JJ1	-2.75176	0.00592763	0.0151395
IS1 - JJ1	-5.44497	5.18148e-08	1.15212e-06
IS1.18 - JJ1	-6.17682	6.54063e-10	6.1809e-08
IS2 - JJ1	-5.44497	5.18148e-08	1.22412e-06
IS2.18 - JJ1	-5.13759	2.78283e-07	3.75683e-06
CC1 - JJ2	-1.40515	0.159976	0.235295
CC1.18 - JJ2	-0.73185	0.46426	0.560672
CC2 - JJ2	-5.22541	1.73767e-07	2.43274e-06
CC2.18 - JJ2	-2.38583	0.0170405	0.0355874
CJ1 - JJ2	-1.84426	0.0651448	0.117261
CJ1.18 - JJ2	-0.14637	0.883629	0.932994
CJ2 - JJ2	-0.790399	0.429295	0.525157
CJ2.18 - JJ2	-0.717213	0.473242	0.557276
DG1 - JJ2	-4.12764	3.6651e-05	0.000187217
DG1.18 - JJ2	-4.85949	1.1769e-06	1.03458e-05
DG2 - JJ2	-2.41511	0.0157306	0.0334054
DG2.18 - JJ2	-1.43443	0.15145	0.228081
IS1 - JJ2	-4.12764	3.6651e-05	0.000189782
IS1.18 - JJ2	-4.85949	1.1769e-06	1.05921e-05
IS2 - JJ2	-4.12764	3.6651e-05	0.000192418
IS2.18 - JJ2	-3.82026	0.000133311	0.000559907
JJ1 - JJ2	1.31733	0.187728	0.271882
CC1 - MY1	1.93209	0.053349	0.10083
CC1.18 - MY1	2.60539	0.00917703	0.0215461
CC2 - MY1	-1.88817	0.0590026	0.107226
CC2.18 - MY1	0.951406	0.341398	0.446535
CJ1 - MY1	1.49298	0.135444	0.206442
CJ1.18 - MY1	3.19087	0.00141846	0.00412444
CJ2 - MY1	2.54684	0.0108703	0.0244583
CJ2.18 - MY1	2.62002	0.00879234	0.0209025
DG1 - MY1	-0.790399	0.429295	0.526862
DG1.18 - MY1	-1.52225	0.127947	0.198212
DG2 - MY1	0.922132	0.35646	0.456752
DG2.18 - MY1	1.90281	0.0570652	0.106785
IS1 - MY1	-0.790399	0.429295	0.528578
IS1.18 - MY1	-1.52225	0.127947	0.199028
IS2 - MY1	-0.790399	0.429295	0.530306
IS2.18 - MY1	-0.483021	0.629081	0.6953
JJ1 - MY1	4.65457	3.24659e-06	2.55669e-05
JJ2 - MY1	3.33724	0.000846154	0.00266538
CC1 - MY2	3.82026	0.000133311	0.000566198
CC1.18 - MY2	4.49356	7.00416e-06	4.90291e-05
CC2 - MY2	0	1	1
CC2.18 - MY2	2.83958	0.0045173	0.0121967
CJ1 - MY2	3.38115	0.000721833	0.00243619
CJ1.18 - MY2	5.07904	3.79342e-07	4.77971e-06
CJ2 - MY2	4.43501	9.20663e-06	5.80018e-05
CJ2.18 - MY2	4.5082	6.53802e-06	4.84583e-05
DG1 - MY2	1.09778	0.272302	0.37842
DG1.18 - MY2	0.365925	0.714421	0.776009
DG2 - MY2	2.81031	0.00494944	0.0128143
DG2.18 - MY2	3.79099	0.000150051	0.000609883
IS1 - MY2	1.09778	0.272302	0.379817
IS1.18 - MY2	0.365925	0.714421	0.778245
IS2 - MY2	1.09778	0.272302	0.381223
IS2.18 - MY2	1.40515	0.159976	0.236214
JJ1 - MY2	6.54274	6.04004e-11	1.14157e-08
JJ2 - MY2	5.22541	1.73767e-07	2.52631e-06
MY1 - MY2	1.88817	0.0590026	0.107744
CC1 - NJ1	-0.614754	0.538717	0.615211
CC1.18 - NJ1	0.058548	0.953312	0.995447
CC2 - NJ1	-4.43501	9.20663e-06	5.89848e-05
CC2.18 - NJ1	-1.59543	0.110615	0.178686
CJ1 - NJ1	-1.05386	0.291945	0.399838
CJ1.18 - NJ1	0.644028	0.519557	0.598758
CJ2 - NJ1	0	1	1
CJ2.18 - NJ1	0.073185	0.941659	0.991496
DG1 - NJ1	-3.33724	0.000846154	0.00268778
DG1.18 - NJ1	-4.06909	4.71974e-05	0.000223008
DG2 - NJ1	-1.62471	0.104225	0.17055
DG2.18 - NJ1	-0.644028	0.519557	0.600589
IS1 - NJ1	-3.33724	0.000846154	0.00271056
IS1.18 - NJ1	-4.06909	4.71974e-05	0.00022583
IS2 - NJ1	-3.33724	0.000846154	0.00273373
IS2.18 - NJ1	-3.02986	0.00244666	0.00685066
JJ1 - NJ1	2.10773	0.0350544	0.0686558
JJ2 - NJ1	0.790399	0.429295	0.532044
MY1 - NJ1	-2.54684	0.0108703	0.0246047
MY2 - NJ1	-4.43501	9.20663e-06	6.00018e-05
CC1 - NJ2	1.93209	0.053349	0.101336
CC1.18 - NJ2	2.60539	0.00917703	0.0216807
CC2 - NJ2	-1.88817	0.0590026	0.108267
CC2.18 - NJ2	0.951406	0.341398	0.448086
CJ1 - NJ2	1.49298	0.135444	0.207278
CJ1.18 - NJ2	3.19087	0.00141846	0.00415642
CJ2 - NJ2	2.54684	0.0108703	0.0247529
CJ2.18 - NJ2	2.62002	0.00879234	0.0210348
DG1 - NJ2	-0.790399	0.429295	0.533795
DG1.18 - NJ2	-1.52225	0.127947	0.199851
DG2 - NJ2	0.922132	0.35646	0.458306
DG2.18 - NJ2	1.90281	0.0570652	0.107317
IS1 - NJ2	-0.790399	0.429295	0.535556
IS1.18 - NJ2	-1.52225	0.127947	0.20068
IS2 - NJ2	-0.790399	0.429295	0.53733
IS2.18 - NJ2	-0.483021	0.629081	0.697339
JJ1 - NJ2	4.65457	3.24659e-06	2.61109e-05
JJ2 - NJ2	3.33724	0.000846154	0.00275729
MY1 - NJ2	0	1	1
MY2 - NJ2	-1.88817	0.0590026	0.108795
NJ1 - NJ2	2.54684	0.0108703	0.0249029
CC1 - UF1	1.00995	0.312517	0.421899
CC1.18 - UF1	1.68326	0.0923255	0.156498
CC2 - UF1	-2.81031	0.00494944	0.0129027
CC2.18 - UF1	0.029274	0.976646	1
CJ1 - UF1	0.570843	0.568106	0.641027
CJ1.18 - UF1	2.26874	0.0232844	0.0470668
CJ2 - UF1	1.62471	0.104225	0.171291
CJ2.18 - UF1	1.69789	0.0895279	0.153825
DG1 - UF1	-1.71253	0.086799	0.151898
DG1.18 - UF1	-2.44438	0.0145101	0.0318885
DG2 - UF1	0	1	1
DG2.18 - UF1	0.98068	0.326751	0.436437
IS1 - UF1	-1.71253	0.086799	0.152605
IS1.18 - UF1	-2.44438	0.0145101	0.032075
IS2 - UF1	-1.71253	0.086799	0.153318
IS2.18 - UF1	-1.40515	0.159976	0.237141
JJ1 - UF1	3.73244	0.000189636	0.000754551
JJ2 - UF1	2.41511	0.0157306	0.0335942
MY1 - UF1	-0.922132	0.35646	0.45987
MY2 - UF1	-2.81031	0.00494944	0.0129923
NJ1 - UF1	1.62471	0.104225	0.172039
NJ2 - UF1	-0.922132	0.35646	0.461445
CC1 - UF1.18	-1.5808	0.113924	0.182472
CC1.18 - UF1.18	-0.907495	0.364145	0.465023
CC2 - UF1.18	-5.40106	6.62495e-08	1.19249e-06
CC2.18 - UF1.18	-2.56148	0.0104228	0.0240233
CJ1 - UF1.18	-2.01991	0.043393	0.0832617
CJ1.18 - UF1.18	-0.322014	0.747442	0.804937
CJ2 - UF1.18	-0.966043	0.334023	0.439933
CJ2.18 - UF1.18	-0.892858	0.371933	0.47337
DG1 - UF1.18	-4.30328	1.68287e-05	9.93947e-05
DG1.18 - UF1.18	-5.03513	4.77521e-07	5.46979e-06
DG2 - UF1.18	-2.59075	0.00957668	0.0222085
DG2.18 - UF1.18	-1.61007	0.107382	0.174208
IS1 - UF1.18	-4.30328	1.68287e-05	0.000100972
IS1.18 - UF1.18	-5.03513	4.77521e-07	5.64072e-06
IS2 - UF1.18	-4.30328	1.68287e-05	0.000102601
IS2.18 - UF1.18	-3.9959	6.44479e-05	0.00029351
JJ1 - UF1.18	1.14169	0.253584	0.363087
JJ2 - UF1.18	-0.175644	0.860574	0.913755
MY1 - UF1.18	-3.51288	0.000443274	0.00167557
MY2 - UF1.18	-5.40106	6.62495e-08	1.25212e-06
NJ1 - UF1.18	-0.966043	0.334023	0.441471
NJ2 - UF1.18	-3.51288	0.000443274	0.0016925
UF1 - UF1.18	-2.59075	0.00957668	0.0223456
CC1 - UF2	-2.23946	0.0251258	0.0502517
CC1.18 - UF2	-1.56616	0.117311	0.185538
CC2 - UF2	-6.05972	1.36357e-09	6.44286e-08
CC2.18 - UF2	-3.22014	0.00128127	0.00384381
CJ1 - UF2	-2.67857	0.00739367	0.0179154
CJ1.18 - UF2	-0.98068	0.326751	0.437985
CJ2 - UF2	-1.62471	0.104225	0.172794
CJ2.18 - UF2	-1.55152	0.120776	0.190223
DG1 - UF2	-4.96195	6.97903e-07	7.32798e-06
DG1.18 - UF2	-5.6938	1.24245e-08	3.61266e-07
DG2 - UF2	-3.24942	0.00115642	0.00349702
DG2.18 - UF2	-2.26874	0.0232844	0.0473198
IS1 - UF2	-4.96195	6.97903e-07	7.53735e-06
IS1.18 - UF2	-5.6938	1.24245e-08	3.91371e-07
IS2 - UF2	-4.96195	6.97903e-07	7.75904e-06
IS2.18 - UF2	-4.65457	3.24659e-06	2.66785e-05
JJ1 - UF2	0.483021	0.629081	0.69939
JJ2 - UF2	-0.83431	0.404107	0.510877
MY1 - UF2	-4.17155	3.02538e-05	0.000173271
MY2 - UF2	-6.05972	1.36357e-09	7.36327e-08
NJ1 - UF2	-1.62471	0.104225	0.173555
NJ2 - UF2	-4.17155	3.02538e-05	0.000175937
UF1 - UF2	-3.24942	0.00115642	0.00352522
UF1.18 - UF2	-0.658665	0.510111	0.591478
CC1 - UF2.18	-2.18091	0.0291897	0.0574673
CC1.18 - UF2.18	-1.50761	0.131654	0.203123
CC2 - UF2.18	-6.00117	1.95896e-09	6.73169e-08
CC2.18 - UF2.18	-3.16159	0.00156908	0.00452758
CJ1 - UF2.18	-2.62002	0.00879234	0.0211688
CJ1.18 - UF2.18	-0.922132	0.35646	0.46303
CJ2 - UF2.18	-1.56616	0.117311	0.186318
CJ2.18 - UF2.18	-1.49298	0.135444	0.208121
DG1 - UF2.18	-4.9034	9.41927e-07	9.12945e-06
DG1.18 - UF2.18	-5.63525	1.74806e-08	4.4051e-07
DG2 - UF2.18	-3.19087	0.00141846	0.00418889
DG2.18 - UF2.18	-2.21019	0.0270921	0.0536168
IS1 - UF2.18	-4.9034	9.41927e-07	9.36969e-06
IS1.18 - UF2.18	-5.63525	1.74806e-08	4.71975e-07
IS2 - UF2.18	-4.9034	9.41927e-07	9.62293e-06
IS2.18 - UF2.18	-4.59602	4.30635e-06	3.32204e-05
JJ1 - UF2.18	0.541569	0.588115	0.657715
JJ2 - UF2.18	-0.775762	0.43789	0.532226
MY1 - UF2.18	-4.113	3.90551e-05	0.000189267
MY2 - UF2.18	-6.00117	1.95896e-09	7.40486e-08
NJ1 - UF2.18	-1.56616	0.117311	0.187104
NJ2 - UF2.18	-4.113	3.90551e-05	0.000191725
UF1 - UF2.18	-3.19087	0.00141846	0.00422187
UF1.18 - UF2.18	-0.600117	0.548428	0.62254
UF2 - UF2.18	0.058548	0.953312	0.998205
CC1 - YS1	3.82026	0.000133311	0.000572633
CC1.18 - YS1	4.49356	7.00416e-06	4.99542e-05
CC2 - YS1	0	1	1
CC2.18 - YS1	2.83958	0.0045173	0.0122844
CJ1 - YS1	3.38115	0.000721833	0.00245813
CJ1.18 - YS1	5.07904	3.79342e-07	4.94453e-06
CJ2 - YS1	4.43501	9.20663e-06	6.10545e-05
CJ2.18 - YS1	4.5082	6.53802e-06	4.94274e-05
DG1 - YS1	1.09778	0.272302	0.382641
DG1.18 - YS1	0.365925	0.714421	0.780494
DG2 - YS1	2.81031	0.00494944	0.0130831
DG2.18 - YS1	3.79099	0.000150051	0.000616513
IS1 - YS1	1.09778	0.272302	0.384068
IS1.18 - YS1	0.365925	0.714421	0.782757
IS2 - YS1	1.09778	0.272302	0.385507
IS2.18 - YS1	1.40515	0.159976	0.238074
JJ1 - YS1	6.54274	6.04004e-11	2.28313e-08
JJ2 - YS1	5.22541	1.73767e-07	2.62736e-06
MY1 - YS1	1.88817	0.0590026	0.109328
MY2 - YS1	0	1	1
NJ1 - YS1	4.43501	9.20663e-06	6.21447e-05
NJ2 - YS1	1.88817	0.0590026	0.109867
UF1 - YS1	2.81031	0.00494944	0.0131753
UF1.18 - YS1	5.40106	6.62495e-08	1.31802e-06
UF2 - YS1	6.05972	1.36357e-09	8.59048e-08
UF2.18 - YS1	6.00117	1.95896e-09	8.22762e-08
CC1 - YS2	-1.40515	0.159976	0.239015
CC1.18 - YS2	-0.73185	0.46426	0.562469
CC2 - YS2	-5.22541	1.73767e-07	2.73683e-06
CC2.18 - YS2	-2.38583	0.0170405	0.0357851
CJ1 - YS2	-1.84426	0.0651448	0.117822
CJ1.18 - YS2	-0.14637	0.883629	0.935607
CJ2 - YS2	-0.790399	0.429295	0.539115
CJ2.18 - YS2	-0.717213	0.473242	0.559018
DG1 - YS2	-4.12764	3.6651e-05	0.000195128
DG1.18 - YS2	-4.85949	1.1769e-06	1.08505e-05
DG2 - YS2	-2.41511	0.0157306	0.033785
DG2.18 - YS2	-1.43443	0.15145	0.228993
IS1 - YS2	-4.12764	3.6651e-05	0.000197916
IS1.18 - YS2	-4.85949	1.1769e-06	1.11217e-05
IS2 - YS2	-4.12764	3.6651e-05	0.000200784
IS2.18 - YS2	-3.82026	0.000133311	0.000579215
JJ1 - YS2	1.31733	0.187728	0.272927
JJ2 - YS2	0	1	1
MY1 - YS2	-3.33724	0.000846154	0.00278127
MY2 - YS2	-5.22541	1.73767e-07	2.85583e-06
NJ1 - YS2	-0.790399	0.429295	0.540912
NJ2 - YS2	-3.33724	0.000846154	0.00280567
UF1 - YS2	-2.41511	0.0157306	0.0339781
UF1.18 - YS2	0.175644	0.860574	0.916329
UF2 - YS2	0.83431	0.404107	0.512592
UF2.18 - YS2	0.775762	0.43789	0.533943
YS1 - YS2	-5.22541	1.73767e-07	2.98564e-06

## Sheet: SOM
Comparison	Z	P.unadj	P.adj
CC1 - CC1.18	0.873505	0.382388	0.470823
CC1 - CC2	0.262051	0.793282	0.814838
CC1.18 - CC2	-0.611453	0.540899	0.617704
CC1 - CC2.18	1.13556	0.256142	0.339726
CC1.18 - CC2.18	0.262051	0.793282	0.817059
CC2 - CC2.18	0.873505	0.382388	0.472362
CC1 - CJ1	2.62051	0.00877972	0.0206133
CC1.18 - CJ1	1.74701	0.0806357	0.135468
CC2 - CJ1	2.35846	0.0183508	0.0381132
CC2.18 - CJ1	1.48496	0.137555	0.20966
CC1 - CJ1.18	3.4649	0.000530424	0.00180631
CC1.18 - CJ1.18	2.5914	0.0095587	0.0220316
CC2 - CJ1.18	3.20285	0.00136074	0.00414807
CC2.18 - CJ1.18	2.32935	0.0198407	0.0405394
CJ1 - CJ1.18	0.844388	0.398453	0.487427
CC1 - CJ2	1.57231	0.115879	0.181001
CC1.18 - CJ2	0.698804	0.484675	0.570738
CC2 - CJ2	1.31026	0.190109	0.271174
CC2.18 - CJ2	0.436752	0.662291	0.721458
CJ1 - CJ2	-1.04821	0.294544	0.379992
CJ1.18 - CJ2	-1.89259	0.0584119	0.102221
CC1 - CJ2.18	2.242	0.0249616	0.0491432
CC1.18 - CJ2.18	1.36849	0.171158	0.246939
CC2 - CJ2.18	1.97994	0.0477098	0.0858776
CC2.18 - CJ2.18	1.10644	0.268536	0.354919
CJ1 - CJ2.18	-0.378519	0.705045	0.761449
CJ1.18 - CJ2.18	-1.22291	0.221365	0.312224
CJ2 - CJ2.18	0.669687	0.503057	0.5869
CC1 - DG1	-2.88257	0.00394451	0.0103543
CC1.18 - DG1	-3.75607	0.000172602	0.000686774
CC2 - DG1	-3.14462	0.00166304	0.00483561
CC2.18 - DG1	-4.01812	5.86638e-05	0.000273764
CJ1 - DG1	-5.50308	3.73212e-08	6.13366e-07
CJ1.18 - DG1	-6.34747	2.18887e-10	1.18199e-08
CJ2 - DG1	-4.45487	8.39422e-06	5.11777e-05
CJ2.18 - DG1	-5.12456	2.98231e-07	3.22089e-06
CC1 - DG1.18	-1.16467	0.244151	0.330786
CC1.18 - DG1.18	-2.03818	0.0415321	0.0769566
CC2 - DG1.18	-1.42672	0.153659	0.226005
CC2.18 - DG1.18	-2.30023	0.0214352	0.043329
CJ1 - DG1.18	-3.78519	0.000153593	0.000638
CJ1.18 - DG1.18	-4.62958	3.66416e-06	2.61331e-05
CJ2 - DG1.18	-2.73698	0.00620057	0.0152196
CJ2.18 - DG1.18	-3.40667	0.000657609	0.00212458
DG1 - DG1.18	1.71789	0.0858162	0.141653
CC1 - DG2	-3.14462	0.00166304	0.0048731
CC1.18 - DG2	-4.01812	5.86638e-05	0.000277186
CC2 - DG2	-3.40667	0.000657609	0.0021429
CC2.18 - DG2	-4.28017	1.86748e-05	0.00010381
CJ1 - DG2	-5.76513	8.1594e-09	1.71347e-07
CJ1.18 - DG2	-6.60952	3.85568e-11	3.64362e-09
CJ2 - DG2	-4.71693	2.39435e-06	1.81013e-05
CJ2.18 - DG2	-5.38661	7.17977e-08	1.04383e-06
DG1 - DG2	-0.262051	0.793282	0.819291
DG1.18 - DG2	-1.97994	0.0477098	0.0862885
CC1 - DG2.18	-1.71789	0.0858162	0.142274
CC1.18 - DG2.18	-2.5914	0.0095587	0.0221668
CC2 - DG2.18	-1.97994	0.0477098	0.0867034
CC2.18 - DG2.18	-2.85345	0.00432475	0.0111969
CJ1 - DG2.18	-4.33841	1.43519e-05	8.47659e-05
CJ1.18 - DG2.18	-5.1828	2.18585e-07	2.50379e-06
CJ2 - DG2.18	-3.2902	0.00100116	0.00315364
CJ2.18 - DG2.18	-3.95989	7.49847e-05	0.000341497
DG1 - DG2.18	1.16467	0.244151	0.331976
DG1.18 - DG2.18	-0.55322	0.580113	0.658507
DG2 - DG2.18	1.42672	0.153659	0.226888
CC1 - IS1	-3.40667	0.000657609	0.00216153
CC1.18 - IS1	-4.28017	1.86748e-05	0.000105359
CC2 - IS1	-3.66872	0.000243768	0.000912318
CC2.18 - IS1	-4.54223	5.56635e-06	3.62773e-05
CJ1 - IS1	-6.02718	1.66842e-09	4.85124e-08
CJ1.18 - IS1	-6.87157	6.34985e-12	2.40024e-09
CJ2 - IS1	-4.97898	6.3921e-07	6.04054e-06
CJ2.18 - IS1	-5.64866	1.61699e-08	2.91058e-07
DG1 - IS1	-0.524103	0.600207	0.665332
DG1.18 - IS1	-2.242	0.0249616	0.0494005
DG2 - IS1	-0.262051	0.793282	0.821536
DG2.18 - IS1	-1.68878	0.0912624	0.147424
CC1 - IS1.18	-1.95083	0.0510776	0.0910723
CC1.18 - IS1.18	-2.82433	0.00473792	0.0121009
CC2 - IS1.18	-2.21288	0.026906	0.0524251
CC2.18 - IS1.18	-3.08638	0.00202607	0.00575831
CJ1 - IS1.18	-4.57134	4.84611e-06	3.27112e-05
CJ1.18 - IS1.18	-5.41573	6.10392e-08	9.22912e-07
CJ2 - IS1.18	-3.52314	0.000426472	0.0015353
CJ2.18 - IS1.18	-4.19282	2.75504e-05	0.00014073
DG1 - IS1.18	0.931738	0.351472	0.445827
DG1.18 - IS1.18	-0.786154	0.431777	0.514864
DG2 - IS1.18	1.19379	0.23256	0.322006
DG2.18 - IS1.18	-0.232935	0.815812	0.833451
IS1 - IS1.18	1.45584	0.145436	0.218155
CC1 - IS2	-2.62051	0.00877972	0.0207421
CC1.18 - IS2	-3.49402	0.000475807	0.00165004
CC2 - IS2	-2.88257	0.00394451	0.0104267
CC2.18 - IS2	-3.75607	0.000172602	0.00069408
CJ1 - IS2	-5.24103	1.59684e-07	1.94711e-06
CJ1.18 - IS2	-6.08542	1.16188e-09	3.99266e-08
CJ2 - IS2	-4.19282	2.75504e-05	0.000142658
CJ2.18 - IS2	-4.86251	1.15906e-06	9.52448e-06
DG1 - IS2	0.262051	0.793282	0.823793
DG1.18 - IS2	-1.45584	0.145436	0.219024
DG2 - IS2	0.524103	0.600207	0.667289
DG2.18 - IS2	-0.902622	0.366727	0.460541
IS1 - IS2	0.786154	0.431777	0.516493
IS1.18 - IS2	-0.669687	0.503057	0.588717
CC1 - IS2.18	-1.45584	0.145436	0.2199
CC1.18 - IS2.18	-2.32935	0.0198407	0.0407598
CC2 - IS2.18	-1.71789	0.0858162	0.142901
CC2.18 - IS2.18	-2.5914	0.0095587	0.0223036
CJ1 - IS2.18	-4.07636	4.5747e-05	0.000224576
CJ1.18 - IS2.18	-4.92074	8.62159e-07	7.57898e-06
CJ2 - IS2.18	-3.02815	0.00246056	0.0068389
CJ2.18 - IS2.18	-3.69784	0.000217444	0.000838714
DG1 - IS2.18	1.42672	0.153659	0.227777
DG1.18 - IS2.18	-0.291168	0.770923	0.813991
DG2 - IS2.18	1.68878	0.0912624	0.148057
DG2.18 - IS2.18	0.262051	0.793282	0.826062
IS1 - IS2.18	1.95083	0.0510776	0.0915039
IS1.18 - IS2.18	0.494986	0.62061	0.683937
IS2 - IS2.18	1.16467	0.244151	0.333174
CC1 - JJ1	1.92171	0.0546422	0.0960686
CC1.18 - JJ1	1.04821	0.294544	0.381293
CC2 - JJ1	1.65966	0.096983	0.154682
CC2.18 - JJ1	0.786154	0.431777	0.518132
CJ1 - JJ1	-0.698804	0.484675	0.572522
CJ1.18 - JJ1	-1.54319	0.122784	0.190998
CJ2 - JJ1	0.349402	0.726788	0.77826
CJ2.18 - JJ1	-0.320285	0.748752	0.797263
DG1 - JJ1	4.80428	1.55312e-06	1.24911e-05
DG1.18 - JJ1	3.08638	0.00202607	0.00580193
DG2 - JJ1	5.06633	4.05563e-07	4.14332e-06
DG2.18 - JJ1	3.6396	0.000273058	0.00101192
IS1 - JJ1	5.32838	9.90929e-08	1.29162e-06
IS1.18 - JJ1	3.87254	0.000107708	0.000462654
IS2 - JJ1	4.54223	5.56635e-06	3.69137e-05
IS2.18 - JJ1	3.37755	0.000731341	0.00234277
CC1 - JJ2	0.611453	0.540899	0.619576
CC1.18 - JJ2	-0.262051	0.793282	0.828344
CC2 - JJ2	0.349402	0.726788	0.780471
CC2.18 - JJ2	-0.524103	0.600207	0.669257
CJ1 - JJ2	-2.00906	0.0445307	0.0813168
CJ1.18 - JJ2	-2.85345	0.00432475	0.0112742
CJ2 - JJ2	-0.960855	0.336625	0.429879
CJ2.18 - JJ2	-1.63054	0.102987	0.163567
DG1 - JJ2	3.49402	0.000475807	0.00166532
DG1.18 - JJ2	1.77613	0.0757121	0.129498
DG2 - JJ2	3.75607	0.000172602	0.000701543
DG2.18 - JJ2	2.32935	0.0198407	0.0409825
IS1 - JJ2	4.01812	5.86638e-05	0.000280695
IS1.18 - JJ2	2.56228	0.0103987	0.023679
IS2 - JJ2	3.23197	0.00122941	0.00377818
IS2.18 - JJ2	2.06729	0.0387064	0.0724308
JJ1 - JJ2	-1.31026	0.190109	0.272201
CC1 - MY1	-1.48496	0.137555	0.210509
CC1.18 - MY1	-2.35846	0.0183508	0.0383237
CC2 - MY1	-1.74701	0.0806357	0.136073
CC2.18 - MY1	-2.62051	0.00877972	0.0208725
CJ1 - MY1	-4.10547	4.03489e-05	0.000200683
CJ1.18 - MY1	-4.94986	7.42666e-07	6.84702e-06
CJ2 - MY1	-3.05727	0.00223365	0.0063009
CJ2.18 - MY1	-3.72695	0.000193808	0.000755251
DG1 - MY1	1.39761	0.162231	0.235859
DG1.18 - MY1	-0.320285	0.748752	0.799515
DG2 - MY1	1.65966	0.096983	0.155337
DG2.18 - MY1	0.232935	0.815812	0.83571
IS1 - MY1	1.92171	0.0546422	0.0965175
IS1.18 - MY1	0.465869	0.641309	0.704694
IS2 - MY1	1.13556	0.256142	0.340922
IS2.18 - MY1	-0.0291168	0.976771	0.976771
JJ1 - MY1	-3.40667	0.000657609	0.00218049
JJ2 - MY1	-2.09641	0.0360457	0.0677874
CC1 - MY2	-0.524103	0.600207	0.671237
CC1.18 - MY2	-1.39761	0.162231	0.236769
CC2 - MY2	-0.786154	0.431777	0.519783
CC2.18 - MY2	-1.65966	0.096983	0.155998
CJ1 - MY2	-3.14462	0.00166304	0.00491117
CJ1.18 - MY2	-3.98901	6.63509e-05	0.000305861
CJ2 - MY2	-2.09641	0.0360457	0.0681264
CJ2.18 - MY2	-2.7661	0.00567314	0.0141082
DG1 - MY2	2.35846	0.0183508	0.0385367
DG1.18 - MY2	0.64057	0.521802	0.603184
DG2 - MY2	2.62051	0.00877972	0.0210046
DG2.18 - MY2	1.19379	0.23256	0.32319
IS1 - MY2	2.88257	0.00394451	0.0105002
IS1.18 - MY2	1.42672	0.153659	0.228674
IS2 - MY2	2.09641	0.0360457	0.0684687
IS2.18 - MY2	0.931738	0.351472	0.447328
JJ1 - MY2	-2.44581	0.0144526	0.031397
JJ2 - MY2	-1.13556	0.256142	0.342126
MY1 - MY2	0.960855	0.336625	0.431336
CC1 - NJ1	1.04821	0.294544	0.382603
CC1.18 - NJ1	0.174701	0.861315	0.875207
CC2 - NJ1	0.786154	0.431777	0.521443
CC2.18 - NJ1	-0.0873505	0.930393	0.937836
CJ1 - NJ1	-1.57231	0.115879	0.181752
CJ1.18 - NJ1	-2.4167	0.0156621	0.0336378
CJ2 - NJ1	-0.524103	0.600207	0.673229
CJ2.18 - NJ1	-1.19379	0.23256	0.324383
DG1 - NJ1	3.93077	8.46736e-05	0.00037217
DG1.18 - NJ1	2.21288	0.026906	0.0526967
DG2 - NJ1	4.19282	2.75504e-05	0.00014464
DG2.18 - NJ1	2.7661	0.00567314	0.0142016
IS1 - NJ1	4.45487	8.39422e-06	5.20167e-05
IS1.18 - NJ1	2.99903	0.00270838	0.0074186
IS2 - NJ1	3.66872	0.000243768	0.000921441
IS2.18 - NJ1	2.50405	0.0122782	0.0271412
JJ1 - NJ1	-0.873505	0.382388	0.47391
JJ2 - NJ1	0.436752	0.662291	0.723543
MY1 - NJ1	2.53316	0.0113038	0.0252831
MY2 - NJ1	1.57231	0.115879	0.182509
CC1 - NJ2	-0.262051	0.793282	0.830639
CC1.18 - NJ2	-1.13556	0.256142	0.34334
CC2 - NJ2	-0.524103	0.600207	0.675233
CC2.18 - NJ2	-1.39761	0.162231	0.237687
CJ1 - NJ2	-2.88257	0.00394451	0.0105746
CJ1.18 - NJ2	-3.72695	0.000193808	0.000763118
CJ2 - NJ2	-1.83436	0.0666005	0.114432
CJ2.18 - NJ2	-2.50405	0.0122782	0.0273009
DG1 - NJ2	2.62051	0.00877972	0.0211384
DG1.18 - NJ2	0.902622	0.366727	0.462076
DG2 - NJ2	2.88257	0.00394451	0.0106502
DG2.18 - NJ2	1.45584	0.145436	0.220783
IS1 - NJ2	3.14462	0.00166304	0.00494984
IS1.18 - NJ2	1.68878	0.0912624	0.148695
IS2 - NJ2	2.35846	0.0183508	0.0387519
IS2.18 - NJ2	1.19379	0.23256	0.325584
JJ1 - NJ2	-2.18376	0.0289797	0.0561761
JJ2 - NJ2	-0.873505	0.382388	0.475469
MY1 - NJ2	1.22291	0.221365	0.313393
MY2 - NJ2	0.262051	0.793282	0.832946
NJ1 - NJ2	-1.31026	0.190109	0.273236
CC1 - UF1	-2.35846	0.0183508	0.0389696
CC1.18 - UF1	-3.23197	0.00122941	0.00380915
CC2 - UF1	-2.62051	0.00877972	0.0212739
CC2.18 - UF1	-3.49402	0.000475807	0.00168089
CJ1 - UF1	-4.97898	6.3921e-07	6.19542e-06
CJ1.18 - UF1	-5.82337	5.76742e-09	1.36255e-07
CJ2 - UF1	-3.93077	8.46736e-05	0.000376549
CJ2.18 - UF1	-4.60046	4.21561e-06	2.95093e-05
DG1 - UF1	0.524103	0.600207	0.677248
DG1.18 - UF1	-1.19379	0.23256	0.326795
DG2 - UF1	0.786154	0.431777	0.523115
DG2.18 - UF1	-0.64057	0.521802	0.605034
IS1 - UF1	1.04821	0.294544	0.383923
IS1.18 - UF1	-0.407636	0.683541	0.742467
IS2 - UF1	0.262051	0.793282	0.835266
IS2.18 - UF1	-0.902622	0.366727	0.463621
JJ1 - UF1	-4.28017	1.86748e-05	0.000106955
JJ2 - UF1	-2.96992	0.00297881	0.00810064
MY1 - UF1	-0.873505	0.382388	0.477038
MY2 - UF1	-1.83436	0.0666005	0.114954
NJ1 - UF1	-3.40667	0.000657609	0.00219979
NJ2 - UF1	-2.09641	0.0360457	0.0688145
CC1 - UF1.18	2.75154	0.00593157	0.0146545
CC1.18 - UF1.18	1.87804	0.0603763	0.105172
CC2 - UF1.18	2.48949	0.0127927	0.0281142
CC2.18 - UF1.18	1.61598	0.106098	0.167803
CJ1 - UF1.18	0.131026	0.895755	0.907762
CJ1.18 - UF1.18	-0.713362	0.475622	0.563589
CJ2 - UF1.18	1.17923	0.238306	0.327562
CJ2.18 - UF1.18	0.509544	0.610371	0.67462
DG1 - UF1.18	5.63411	1.75969e-08	3.02346e-07
DG1.18 - UF1.18	3.91621	8.99507e-05	0.00039082
DG2 - UF1.18	5.89616	3.72064e-09	9.376e-08
DG2.18 - UF1.18	4.46943	7.84272e-06	5.02466e-05
IS1 - UF1.18	6.15821	7.35722e-10	2.78103e-08
IS1.18 - UF1.18	4.70237	2.57162e-06	1.90602e-05
IS2 - UF1.18	5.37205	7.78445e-08	1.08982e-06
IS2.18 - UF1.18	4.20738	2.58347e-05	0.000137542
JJ1 - UF1.18	0.82983	0.406635	0.495833
JJ2 - UF1.18	2.14009	0.0323477	0.0620683
MY1 - UF1.18	4.2365	2.27032e-05	0.000122598
MY2 - UF1.18	3.27564	0.00105422	0.00329334
NJ1 - UF1.18	1.70333	0.0885055	0.144827
NJ2 - UF1.18	3.01359	0.00258175	0.00712337
UF1 - UF1.18	5.11	3.22153e-07	3.38261e-06
CC1 - UF2	2.31479	0.0206245	0.0419144
CC1.18 - UF2	1.44128	0.149505	0.223371
CC2 - UF2	2.05274	0.0400982	0.0746655
CC2.18 - UF2	1.17923	0.238306	0.328758
CJ1 - UF2	-0.305727	0.759813	0.806767
CJ1.18 - UF2	-1.15011	0.250097	0.33763
CJ2 - UF2	0.742479	0.457797	0.544174
CJ2.18 - UF2	0.0727921	0.941972	0.946982
DG1 - UF2	5.19735	2.02145e-07	2.38784e-06
DG1.18 - UF2	3.47946	0.000502424	0.00172651
DG2 - UF2	5.45941	4.77732e-08	7.52428e-07
DG2.18 - UF2	4.03268	5.51442e-05	0.000267237
IS1 - UF2	5.72146	1.05615e-08	2.10117e-07
IS1.18 - UF2	4.26562	1.99352e-05	0.00010921
IS2 - UF2	4.9353	8.00267e-07	7.2024e-06
IS2.18 - UF2	3.77063	0.000162836	0.000669045
JJ1 - UF2	0.393077	0.694262	0.751952
JJ2 - UF2	1.70333	0.0885055	0.145457
MY1 - UF2	3.79975	0.000144844	0.000608347
MY2 - UF2	2.83889	0.00452707	0.011641
NJ1 - UF2	1.26658	0.205305	0.291749
NJ2 - UF2	2.57684	0.00997083	0.0228423
UF1 - UF2	4.67325	2.96469e-06	2.1551e-05
UF1.18 - UF2	-0.436752	0.662291	0.72564
CC1 - UF2.18	3.2902	0.00100116	0.00318014
CC1.18 - UF2.18	2.4167	0.0156621	0.0338301
CC2 - UF2.18	3.02815	0.00246056	0.00688956
CC2.18 - UF2.18	2.15465	0.0311896	0.0601514
CJ1 - UF2.18	0.669687	0.503057	0.590546
CJ1.18 - UF2.18	-0.174701	0.861315	0.877566
CJ2 - UF2.18	1.71789	0.0858162	0.143533
CJ2.18 - UF2.18	1.04821	0.294544	0.385251
DG1 - UF2.18	6.17277	6.71049e-10	2.8184e-08
DG1.18 - UF2.18	4.45487	8.39422e-06	5.28836e-05
DG2 - UF2.18	6.43482	1.23621e-10	7.7881e-09
DG2.18 - UF2.18	5.00809	5.49716e-07	5.46822e-06
IS1 - UF2.18	6.69687	2.1293e-11	2.68292e-09
IS1.18 - UF2.18	5.24103	1.59684e-07	2.01201e-06
IS2 - UF2.18	5.91072	3.40624e-09	9.19684e-08
IS2.18 - UF2.18	4.74604	2.07435e-06	1.60021e-05
JJ1 - UF2.18	1.36849	0.171158	0.247885
JJ2 - UF2.18	2.67875	0.00738979	0.0180216
MY1 - UF2.18	4.77516	1.79565e-06	1.41407e-05
MY2 - UF2.18	3.8143	0.000136567	0.000580026
NJ1 - UF2.18	2.242	0.0249616	0.0496605
NJ2 - UF2.18	3.55225	0.000381947	0.00138823
UF1 - UF2.18	5.64866	1.61699e-08	3.05611e-07
UF1.18 - UF2.18	0.538661	0.590121	0.667861
UF2 - UF2.18	0.975414	0.329355	0.423457
CC1 - YS1	3.40667	0.000657609	0.00221943
CC1.18 - YS1	2.53316	0.0113038	0.0254336
CC2 - YS1	3.14462	0.00166304	0.00498912
CC2.18 - YS1	2.27111	0.0231402	0.0462803
CJ1 - YS1	0.786154	0.431777	0.524797
CJ1.18 - YS1	-0.0582337	0.953563	0.956092
CJ2 - YS1	1.83436	0.0666005	0.115482
CJ2.18 - YS1	1.16467	0.244151	0.334381
DG1 - YS1	6.28923	3.19035e-10	1.50744e-08
DG1.18 - YS1	4.57134	4.84611e-06	3.3306e-05
DG2 - YS1	6.55129	5.70436e-11	4.31249e-09
DG2.18 - YS1	5.12456	2.98231e-07	3.31562e-06
IS1 - YS1	6.81334	9.53599e-12	1.8023e-09
IS1.18 - YS1	5.3575	8.43831e-08	1.13917e-06
IS2 - YS1	6.02718	1.66842e-09	5.25551e-08
IS2.18 - YS1	4.86251	1.15906e-06	9.73614e-06
JJ1 - YS1	1.48496	0.137555	0.211365
JJ2 - YS1	2.79522	0.00518651	0.01307
MY1 - YS1	4.89163	1.00006e-06	8.59141e-06
MY2 - YS1	3.93077	8.46736e-05	0.000381031
NJ1 - YS1	2.35846	0.0183508	0.0391898
NJ2 - YS1	3.66872	0.000243768	0.000930749
UF1 - YS1	5.76513	8.1594e-09	1.81427e-07
UF1.18 - YS1	0.655129	0.512385	0.595943
UF2 - YS1	1.09188	0.274885	0.362044
UF2.18 - YS1	0.116467	0.907282	0.916986
CC1 - YS2	-0.873505	0.382388	0.478618
CC1.18 - YS2	-1.74701	0.0806357	0.136683
CC2 - YS2	-1.13556	0.256142	0.344562
CC2.18 - YS2	-2.00906	0.0445307	0.0817116
CJ1 - YS2	-3.49402	0.000475807	0.00169674
CJ1.18 - YS2	-4.33841	1.43519e-05	8.61114e-05
CJ2 - YS2	-2.44581	0.0144526	0.0315785
CJ2.18 - YS2	-3.1155	0.00183633	0.00529872
DG1 - YS2	2.00906	0.0445307	0.0821102
DG1.18 - YS2	0.291168	0.770923	0.816271
DG2 - YS2	2.27111	0.0231402	0.0465265
DG2.18 - YS2	0.844388	0.398453	0.48901
IS1 - YS2	2.53316	0.0113038	0.0255859
IS1.18 - YS2	1.07732	0.281336	0.369254
IS2 - YS2	1.74701	0.0806357	0.137299
IS2.18 - YS2	0.582337	0.56034	0.637977
JJ1 - YS2	-2.79522	0.00518651	0.0131577
JJ2 - YS2	-1.48496	0.137555	0.212228
MY1 - YS2	0.611453	0.540899	0.621459
MY2 - YS2	-0.349402	0.726788	0.782694
NJ1 - YS2	-1.92171	0.0546422	0.0969706
NJ2 - YS2	-0.611453	0.540899	0.623354
UF1 - YS2	1.48496	0.137555	0.213097
UF1.18 - YS2	-3.62505	0.000288911	0.00106028
UF2 - YS2	-3.18829	0.00143116	0.00432782
UF2.18 - YS2	-4.16371	3.13123e-05	0.000157814
YS1 - YS2	-4.28017	1.86748e-05	0.000108601

## Sheet: TN
Comparison	Z	P.unadj	P.adj
CC1 - CC1.18	0.291248	0.770862	0.813927
CC1 - CC2	0.349498	0.726716	0.775985
CC1.18 - CC2	0.0582496	0.95355	0.958622
CC1 - CC2.18	0.407747	0.683459	0.740251
CC1.18 - CC2.18	0.116499	0.907257	0.924375
CC2 - CC2.18	0.0582496	0.95355	0.961178
CC1 - CJ1	2.70861	0.00675665	0.0163719
CC1.18 - CJ1	2.41736	0.0156336	0.0331995
CC2 - CJ1	2.35911	0.0183189	0.0382571
CC2.18 - CJ1	2.30086	0.0213996	0.0434895
CC1 - CJ1.18	2.66492	0.00770069	0.0183073
CC1.18 - CJ1.18	2.37367	0.0176122	0.0369857
CC2 - CJ1.18	2.31542	0.0205899	0.0425299
CC2.18 - CJ1.18	2.25717	0.0239973	0.0474921
CJ1 - CJ1.18	-0.0436872	0.965154	0.965154
CC1 - CJ2	1.48536	0.137447	0.209496
CC1.18 - CJ2	1.19412	0.232432	0.321829
CC2 - CJ2	1.13587	0.256012	0.345616
CC2.18 - CJ2	1.07762	0.281204	0.371662
CJ1 - CJ2	-1.22324	0.221239	0.308591
CJ1.18 - CJ2	-1.17955	0.238178	0.328581
CC1 - CJ2.18	1.54361	0.122682	0.191627
CC1.18 - CJ2.18	1.25237	0.210436	0.29681
CC2 - CJ2.18	1.19412	0.232432	0.323013
CC2.18 - CJ2.18	1.13587	0.256012	0.346855
CJ1 - CJ2.18	-1.16499	0.244022	0.334204
CJ1.18 - CJ2.18	-1.1213	0.262158	0.352654
CJ2 - CJ2.18	0.0582496	0.95355	0.963748
CC1 - DG1	-2.97073	0.00297094	0.00825745
CC1.18 - DG1	-3.26198	0.00110638	0.00345629
CC2 - DG1	-3.32023	0.000899443	0.00285705
CC2.18 - DG1	-3.37848	0.000728887	0.00237517
CJ1 - DG1	-5.67934	1.35219e-08	2.69015e-07
CJ1.18 - DG1	-5.63565	1.74401e-08	3.29618e-07
CJ2 - DG1	-4.45609	8.34665e-06	5.17218e-05
CJ2.18 - DG1	-4.51434	6.35132e-06	4.06915e-05
CC1 - DG1.18	-2.49017	0.0127682	0.0280603
CC1.18 - DG1.18	-2.78142	0.0054122	0.0134593
CC2 - DG1.18	-2.83967	0.00451605	0.0116923
CC2.18 - DG1.18	-2.89792	0.0037565	0.0102155
CJ1 - DG1.18	-5.19878	2.00605e-07	2.44608e-06
CJ1.18 - DG1.18	-5.15509	2.5351e-07	2.73791e-06
CJ2 - DG1.18	-3.97553	7.02213e-05	0.000323703
CJ2.18 - DG1.18	-4.03378	5.48857e-05	0.000262618
DG1 - DG1.18	0.480559	0.63083	0.699278
CC1 - DG2	-3.84447	0.000120812	0.00051311
CC1.18 - DG2	-4.13572	3.53842e-05	0.000178336
CC2 - DG2	-4.19397	2.74113e-05	0.000143909
CC2.18 - DG2	-4.25222	2.11661e-05	0.000117659
CJ1 - DG2	-6.55308	5.63625e-11	5.32626e-09
CJ1.18 - DG2	-6.50939	7.54555e-11	5.70444e-09
CJ2 - DG2	-5.32984	9.83005e-08	1.37621e-06
CJ2.18 - DG2	-5.38809	7.12114e-08	1.0353e-06
DG1 - DG2	-0.873744	0.382258	0.472201
DG1.18 - DG2	-1.3543	0.17564	0.258334
CC1 - DG2.18	-3.4076	0.000655366	0.00215416
CC1.18 - DG2.18	-3.69885	0.000216579	0.000843989
CC2 - DG2.18	-3.7571	0.000171895	0.00068396
CC2.18 - DG2.18	-3.81535	0.000135991	0.000558745
CJ1 - DG2.18	-6.11621	9.58286e-10	3.62232e-08
CJ1.18 - DG2.18	-6.07252	1.25918e-09	4.32701e-08
CJ2 - DG2.18	-4.89297	9.93276e-07	8.53314e-06
CJ2.18 - DG2.18	-4.95122	7.37514e-07	6.79952e-06
DG1 - DG2.18	-0.436872	0.662204	0.725545
DG1.18 - DG2.18	-0.917431	0.358917	0.44924
DG2 - DG2.18	0.436872	0.662204	0.727655
CC1 - IS1	-2.53386	0.0112815	0.0252331
CC1.18 - IS1	-2.82511	0.00472651	0.0120718
CC2 - IS1	-2.88335	0.00393464	0.0103284
CC2.18 - IS1	-2.9416	0.00326517	0.009009
CJ1 - IS1	-5.24246	1.58447e-07	2.06527e-06
CJ1.18 - IS1	-5.19878	2.00605e-07	2.52762e-06
CJ2 - IS1	-4.01922	5.83906e-05	0.000275896
CJ2.18 - IS1	-4.07747	4.55281e-05	0.000223502
DG1 - IS1	0.436872	0.662204	0.729776
DG1.18 - IS1	-0.0436872	0.965154	0.967714
DG2 - IS1	1.31062	0.189988	0.273062
DG2.18 - IS1	0.873744	0.382258	0.473749
CC1 - IS1.18	-2.12611	0.0334941	0.0639433
CC1.18 - IS1.18	-2.41736	0.0156336	0.0333871
CC2 - IS1.18	-2.47561	0.013301	0.0290622
CC2.18 - IS1.18	-2.53386	0.0112815	0.0253833
CJ1 - IS1.18	-4.83472	1.33336e-06	1.09567e-05
CJ1.18 - IS1.18	-4.79103	1.65928e-06	1.33448e-05
CJ2 - IS1.18	-3.61147	0.000304461	0.00108572
CJ2.18 - IS1.18	-3.66972	0.000242812	0.000908742
DG1 - IS1.18	0.844619	0.398324	0.484136
DG1.18 - IS1.18	0.36406	0.715813	0.773078
DG2 - IS1.18	1.71836	0.0857304	0.140896
DG2.18 - IS1.18	1.28149	0.200021	0.286394
IS1 - IS1.18	0.407747	0.683459	0.742378
CC1 - IS2	-2.27173	0.0231026	0.0462051
CC1.18 - IS2	-2.56298	0.0103777	0.0239194
CC2 - IS2	-2.62123	0.00876127	0.020443
CC2.18 - IS2	-2.67948	0.00737363	0.0177531
CJ1 - IS2	-4.98034	6.34726e-07	5.99816e-06
CJ1.18 - IS2	-4.93665	7.94746e-07	6.98638e-06
CJ2 - IS2	-3.7571	0.000171895	0.000691236
CJ2.18 - IS2	-3.81535	0.000135991	0.000564885
DG1 - IS2	0.698995	0.484555	0.567064
DG1.18 - IS2	0.218436	0.827089	0.854207
DG2 - IS2	1.57274	0.115779	0.182352
DG2.18 - IS2	1.13587	0.256012	0.348103
IS1 - IS2	0.262123	0.793226	0.823735
IS1.18 - IS2	-0.145624	0.884218	0.903336
CC1 - IS2.18	-1.54361	0.122682	0.192422
CC1.18 - IS2.18	-1.83486	0.0665261	0.113274
CC2 - IS2.18	-1.89311	0.058343	0.102575
CC2.18 - IS2.18	-1.95136	0.0510141	0.0913901
CJ1 - IS2.18	-4.25222	2.11661e-05	0.000119415
CJ1.18 - IS2.18	-4.20853	2.57034e-05	0.000138798
CJ2 - IS2.18	-3.02898	0.00245382	0.00697401
CJ2.18 - IS2.18	-3.08723	0.00202032	0.00587448
DG1 - IS2.18	1.42712	0.153547	0.231238
DG1.18 - IS2.18	0.946556	0.343865	0.43327
DG2 - IS2.18	2.30086	0.0213996	0.0437246
DG2.18 - IS2.18	1.86399	0.0623235	0.108564
IS1 - IS2.18	0.990243	0.322055	0.411273
IS1.18 - IS2.18	0.582496	0.560233	0.643672
IS2 - IS2.18	0.72812	0.46654	0.552828
CC1 - JJ1	2.44648	0.0144258	0.0309826
CC1.18 - JJ1	2.15523	0.0311434	0.0597575
CC2 - JJ1	2.09699	0.0359949	0.0676918
CC2.18 - JJ1	2.03874	0.0414764	0.0768533
CJ1 - JJ1	-0.262123	0.793226	0.826004
CJ1.18 - JJ1	-0.218436	0.827089	0.856547
CJ2 - JJ1	0.961118	0.336493	0.425399
CJ2.18 - JJ1	0.902869	0.366596	0.455833
DG1 - JJ1	5.41721	6.05355e-08	9.15296e-07
DG1.18 - JJ1	4.93665	7.94746e-07	7.15272e-06
DG2 - JJ1	6.29096	3.15516e-10	1.98775e-08
DG2.18 - JJ1	5.85408	4.79645e-09	1.20871e-07
IS1 - JJ1	4.98034	6.34726e-07	6.15196e-06
IS1.18 - JJ1	4.57259	4.81725e-06	3.1946e-05
IS2 - JJ1	4.71822	2.3792e-06	1.76341e-05
IS2.18 - JJ1	3.9901	6.60462e-05	0.000308216
CC1 - JJ2	0.698995	0.484555	0.568826
CC1.18 - JJ2	0.407747	0.683459	0.744518
CC2 - JJ2	0.349498	0.726716	0.778183
CC2.18 - JJ2	0.291248	0.770862	0.816206
CJ1 - JJ2	-2.00961	0.0444724	0.0816046
CJ1.18 - JJ2	-1.96592	0.0493074	0.089178
CJ2 - JJ2	-0.78637	0.431651	0.519631
CJ2.18 - JJ2	-0.844619	0.398324	0.485698
DG1 - JJ2	3.66972	0.000242812	0.00091783
DG1.18 - JJ2	3.18917	0.00142684	0.00434957
DG2 - JJ2	4.54347	5.53361e-06	3.60639e-05
DG2.18 - JJ2	4.1066	4.01532e-05	0.000199709
IS1 - JJ2	3.23285	0.00122561	0.00379738
IS1.18 - JJ2	2.82511	0.00472651	0.0121539
IS2 - JJ2	2.97073	0.00297094	0.00831862
IS2.18 - JJ2	2.24261	0.024922	0.048811
JJ1 - JJ2	-1.74749	0.0805528	0.132965
CC1 - MY1	-1.96592	0.0493074	0.0896067
CC1.18 - MY1	-2.25717	0.0239973	0.0477421
CC2 - MY1	-2.31542	0.0205899	0.0427636
CC2.18 - MY1	-2.37367	0.0176122	0.0371923
CJ1 - MY1	-4.67453	2.94628e-06	2.10131e-05
CJ1.18 - MY1	-4.63084	3.6418e-06	2.50291e-05
CJ2 - MY1	-3.45129	0.000557917	0.00191721
CJ2.18 - MY1	-3.50954	0.000448886	0.00158578
DG1 - MY1	1.00481	0.314991	0.40637
DG1.18 - MY1	0.524246	0.600107	0.671126
DG2 - MY1	1.87855	0.060306	0.105536
DG2.18 - MY1	1.44168	0.149393	0.22679
IS1 - MY1	0.567934	0.57008	0.651028
IS1.18 - MY1	0.160186	0.872734	0.89645
IS2 - MY1	0.30581	0.759749	0.8067
IS2.18 - MY1	-0.42231	0.672799	0.735023
JJ1 - MY1	-4.41241	1.02228e-05	6.13367e-05
JJ2 - MY1	-2.66492	0.00770069	0.0184232
CC1 - MY2	-1.22324	0.221239	0.309734
CC1.18 - MY2	-1.51449	0.129902	0.199605
CC2 - MY2	-1.57274	0.115779	0.183115
CC2.18 - MY2	-1.63099	0.102893	0.164803
CJ1 - MY2	-3.93185	8.42955e-05	0.0003839
CJ1.18 - MY2	-3.88816	0.000101007	0.00044396
CJ2 - MY2	-2.70861	0.00675665	0.0164775
CJ2.18 - MY2	-2.76686	0.00565998	0.0139835
DG1 - MY2	1.74749	0.0805528	0.133548
DG1.18 - MY2	1.26693	0.205181	0.291573
DG2 - MY2	2.62123	0.00876127	0.0205699
DG2.18 - MY2	2.18436	0.0289358	0.0558048
IS1 - MY2	1.31062	0.189988	0.274104
IS1.18 - MY2	0.902869	0.366596	0.457337
IS2 - MY2	1.04849	0.294412	0.385078
IS2.18 - MY2	0.320373	0.748686	0.797192
JJ1 - MY2	-3.66972	0.000242812	0.000927101
JJ2 - MY2	-1.92224	0.054576	0.0968532
MY1 - MY2	0.742682	0.457674	0.545744
CC1 - NJ1	-0.436872	0.662204	0.73191
CC1.18 - NJ1	-0.72812	0.46654	0.554567
CC2 - NJ1	-0.78637	0.431651	0.521291
CC2.18 - NJ1	-0.844619	0.398324	0.48727
CJ1 - NJ1	-3.14548	0.00165816	0.00489674
CJ1.18 - NJ1	-3.10179	0.00192354	0.00563641
CJ2 - NJ1	-1.92224	0.054576	0.09731
CJ2.18 - NJ1	-1.98049	0.0476489	0.0870111
DG1 - NJ1	2.53386	0.0112815	0.0255353
DG1.18 - NJ1	2.0533	0.0400437	0.0749332
DG2 - NJ1	3.4076	0.000655366	0.00217306
DG2.18 - NJ1	2.97073	0.00297094	0.0083807
IS1 - NJ1	2.09699	0.0359949	0.0680303
IS1.18 - NJ1	1.68924	0.0911738	0.147913
IS2 - NJ1	1.83486	0.0665261	0.113787
IS2.18 - NJ1	1.10674	0.268405	0.357244
JJ1 - NJ1	-2.88335	0.00393464	0.0104007
JJ2 - NJ1	-1.13587	0.256012	0.34936
MY1 - NJ1	1.52905	0.126252	0.194788
MY2 - NJ1	0.78637	0.431651	0.522962
CC1 - NJ2	-0.961118	0.336493	0.426826
CC1.18 - NJ2	-1.25237	0.210436	0.297921
CC2 - NJ2	-1.31062	0.189988	0.275154
CC2.18 - NJ2	-1.36887	0.171041	0.252553
CJ1 - NJ2	-3.66972	0.000242812	0.000936561
CJ1.18 - NJ2	-3.62604	0.000287804	0.00104606
CJ2 - NJ2	-2.44648	0.0144258	0.0311596
CJ2.18 - NJ2	-2.50473	0.0122544	0.027248
DG1 - NJ2	2.00961	0.0444724	0.0820027
DG1.18 - NJ2	1.52905	0.126252	0.195586
DG2 - NJ2	2.88335	0.00393464	0.0104739
DG2.18 - NJ2	2.44648	0.0144258	0.0313387
IS1 - NJ2	1.57274	0.115779	0.183885
IS1.18 - NJ2	1.16499	0.244022	0.33542
IS2 - NJ2	1.31062	0.189988	0.276213
IS2.18 - NJ2	0.582496	0.560233	0.645634
JJ1 - NJ2	-3.4076	0.000655366	0.00219229
JJ2 - NJ2	-1.66011	0.0968916	0.156517
MY1 - NJ2	1.00481	0.314991	0.407762
MY2 - NJ2	0.262123	0.793226	0.828286
NJ1 - NJ2	-0.524246	0.600107	0.673117
CC1 - UF1	-3.49498	0.000474105	0.00165937
CC1.18 - UF1	-3.78622	0.000152954	0.000621684
CC2 - UF1	-3.84447	0.000120812	0.000518941
CC2.18 - UF1	-3.90272	9.51166e-05	0.000428025
CJ1 - UF1	-6.20358	5.51923e-10	2.98039e-08
CJ1.18 - UF1	-6.15989	7.27934e-10	3.05732e-08
CJ2 - UF1	-4.98034	6.34726e-07	6.31385e-06
CJ2.18 - UF1	-5.03859	4.68974e-07	4.79114e-06
DG1 - UF1	-0.524246	0.600107	0.675121
DG1.18 - UF1	-1.00481	0.314991	0.409163
DG2 - UF1	0.349498	0.726716	0.780394
DG2.18 - UF1	-0.0873744	0.930374	0.942845
IS1 - UF1	-0.961118	0.336493	0.428263
IS1.18 - UF1	-1.36887	0.171041	0.253544
IS2 - UF1	-1.22324	0.221239	0.310885
IS2.18 - UF1	-1.95136	0.0510141	0.0918253
JJ1 - UF1	-5.94146	2.82497e-09	7.62742e-08
JJ2 - UF1	-4.19397	2.74113e-05	0.000145936
MY1 - UF1	-1.52905	0.126252	0.196391
MY2 - UF1	-2.27173	0.0231026	0.0464509
NJ1 - UF1	-3.0581	0.00222742	0.00637853
NJ2 - UF1	-2.53386	0.0112815	0.0256891
CC1 - UF1.18	1.33974	0.18033	0.264204
CC1.18 - UF1.18	1.04849	0.294412	0.386415
CC2 - UF1.18	0.990243	0.322055	0.412667
CC2.18 - UF1.18	0.931994	0.35134	0.441218
CJ1 - UF1.18	-1.36887	0.171041	0.254542
CJ1.18 - UF1.18	-1.32518	0.185112	0.270164
CJ2 - UF1.18	-0.145624	0.884218	0.905785
CJ2.18 - UF1.18	-0.203874	0.838452	0.863583
DG1 - UF1.18	4.31047	1.62908e-05	9.33018e-05
DG1.18 - UF1.18	3.82991	0.00012819	0.000538397
DG2 - UF1.18	5.18421	2.16928e-07	2.56246e-06
DG2.18 - UF1.18	4.74734	2.06107e-06	1.6231e-05
IS1 - UF1.18	3.8736	0.00010724	0.00046594
IS1.18 - UF1.18	3.46585	0.000528556	0.00183298
IS2 - UF1.18	3.61147	0.000304461	0.00109606
IS2.18 - UF1.18	2.88335	0.00393464	0.0105482
JJ1 - UF1.18	-1.10674	0.268405	0.358506
JJ2 - UF1.18	0.640746	0.521688	0.606763
MY1 - UF1.18	3.30566	0.000947515	0.00298467
MY2 - UF1.18	2.56298	0.0103777	0.0240662
NJ1 - UF1.18	1.77661	0.075632	0.1265
NJ2 - UF1.18	2.30086	0.0213996	0.0439622
UF1 - UF1.18	4.83472	1.33336e-06	1.12002e-05
CC1 - UF2	2.18436	0.0289358	0.056091
CC1.18 - UF2	1.89311	0.058343	0.103054
CC2 - UF2	1.83486	0.0665261	0.114304
CC2.18 - UF2	1.77661	0.075632	0.127062
CJ1 - UF2	-0.524246	0.600107	0.677136
CJ1.18 - UF2	-0.480559	0.63083	0.701334
CJ2 - UF2	0.698995	0.484555	0.570598
CJ2.18 - UF2	0.640746	0.521688	0.608636
DG1 - UF2	5.15509	2.5351e-07	2.81844e-06
DG1.18 - UF2	4.67453	2.94628e-06	2.14172e-05
DG2 - UF2	6.02883	1.65148e-09	5.20216e-08
DG2.18 - UF2	5.59196	2.24519e-08	3.85765e-07
IS1 - UF2	4.71822	2.3792e-06	1.79868e-05
IS1.18 - UF2	4.31047	1.62908e-05	9.47372e-05
IS2 - UF2	4.45609	8.34665e-06	5.25839e-05
IS2.18 - UF2	3.72797	0.000193025	0.000760037
JJ1 - UF2	-0.262123	0.793226	0.830581
JJ2 - UF2	1.48536	0.137447	0.210344
MY1 - UF2	4.15028	3.32064e-05	0.000169622
MY2 - UF2	3.4076	0.000655366	0.00221186
NJ1 - UF2	2.62123	0.00876127	0.0206985
NJ2 - UF2	3.14548	0.00165816	0.0049353
UF1 - UF2	5.67934	1.35219e-08	2.8396e-07
UF1.18 - UF2	0.844619	0.398324	0.488852
CC1 - UF2.18	2.09699	0.0359949	0.0683722
CC1.18 - UF2.18	1.80574	0.0709594	0.120281
CC2 - UF2.18	1.74749	0.0805528	0.134136
CC2.18 - UF2.18	1.68924	0.0911738	0.14855
CJ1 - UF2.18	-0.611621	0.540789	0.625132
CJ1.18 - UF2.18	-0.567934	0.57008	0.653001
CJ2 - UF2.18	0.611621	0.540789	0.627049
CJ2.18 - UF2.18	0.553371	0.580009	0.660372
DG1 - UF2.18	5.06771	4.0262e-07	4.22751e-06
DG1.18 - UF2.18	4.58716	4.49326e-06	3.03295e-05
DG2 - UF2.18	5.94146	2.82497e-09	8.21414e-08
DG2.18 - UF2.18	5.50459	3.70035e-08	6.08145e-07
IS1 - UF2.18	4.63084	3.6418e-06	2.54926e-05
IS1.18 - UF2.18	4.2231	2.4097e-05	0.000132009
IS2 - UF2.18	4.36872	1.24977e-05	7.38146e-05
IS2.18 - UF2.18	3.6406	0.000272004	0.00100801
JJ1 - UF2.18	-0.349498	0.726716	0.782617
JJ2 - UF2.18	1.39799	0.162116	0.242213
MY1 - UF2.18	4.06291	4.84649e-05	0.000234868
MY2 - UF2.18	3.32023	0.000899443	0.00288127
NJ1 - UF2.18	2.53386	0.0112815	0.0258448
NJ2 - UF2.18	3.0581	0.00222742	0.00642723
UF1 - UF2.18	5.59196	2.24519e-08	4.04135e-07
UF1.18 - UF2.18	0.757245	0.448903	0.538684
UF2 - UF2.18	-0.0873744	0.930374	0.94538
CC1 - YS1	3.18917	0.00142684	0.00438493
CC1.18 - YS1	2.89792	0.0037565	0.0102895
CC2 - YS1	2.83967	0.00451605	0.0117729
CC2.18 - YS1	2.78142	0.0054122	0.0135484
CJ1 - YS1	0.480559	0.63083	0.703403
CJ1.18 - YS1	0.524246	0.600107	0.679163
CJ2 - YS1	1.7038	0.0884183	0.144685
CJ2.18 - YS1	1.64555	0.0998562	0.16062
DG1 - YS1	6.15989	7.27934e-10	3.43949e-08
DG1.18 - YS1	5.67934	1.35219e-08	3.00664e-07
DG2 - YS1	7.03364	2.01216e-12	7.60596e-10
DG2.18 - YS1	6.59677	4.20222e-11	5.29479e-09
IS1 - YS1	5.72302	1.04645e-08	2.47225e-07
IS1.18 - YS1	5.31528	1.06496e-07	1.4377e-06
IS2 - YS1	5.4609	4.73728e-08	7.46122e-07
IS2.18 - YS1	4.73278	2.21466e-06	1.70845e-05
JJ1 - YS1	0.742682	0.457674	0.547471
JJ2 - YS1	2.49017	0.0127682	0.0282244
MY1 - YS1	5.15509	2.5351e-07	2.90385e-06
MY2 - YS1	4.41241	1.02228e-05	6.2326e-05
NJ1 - YS1	3.62604	0.000287804	0.00105621
NJ2 - YS1	4.15028	3.32064e-05	0.000171945
UF1 - YS1	6.68414	2.32283e-11	4.39015e-09
UF1.18 - YS1	1.84942	0.0643965	0.11166
UF2 - YS1	1.00481	0.314991	0.410574
UF2.18 - YS1	1.09218	0.274754	0.364411
CC1 - YS2	-0.698995	0.484555	0.572381
CC1.18 - YS2	-0.990243	0.322055	0.414071
CC2 - YS2	-1.04849	0.294412	0.387762
CC2.18 - YS2	-1.10674	0.268405	0.359777
CJ1 - YS2	-3.4076	0.000655366	0.00223179
CJ1.18 - YS2	-3.36391	0.000768455	0.0024827
CJ2 - YS2	-2.18436	0.0289358	0.0563801
CJ2.18 - YS2	-2.24261	0.024922	0.0490652
DG1 - YS2	2.27173	0.0231026	0.0466993
DG1.18 - YS2	1.79118	0.0732652	0.123635
DG2 - YS2	3.14548	0.00165816	0.00497447
DG2.18 - YS2	2.70861	0.00675665	0.0165845
IS1 - YS2	1.83486	0.0665261	0.114826
IS1.18 - YS2	1.42712	0.153547	0.232163
IS2 - YS2	1.57274	0.115779	0.184661
IS2.18 - YS2	0.844619	0.398324	0.490444
JJ1 - YS2	-3.14548	0.00165816	0.00501426
JJ2 - YS2	-1.39799	0.162116	0.243174
MY1 - YS2	1.26693	0.205181	0.292673
MY2 - YS2	0.524246	0.600107	0.681203
NJ1 - YS2	-0.262123	0.793226	0.832888
NJ2 - YS2	0.262123	0.793226	0.835208
UF1 - YS2	2.79598	0.00517425	0.0130391
UF1.18 - YS2	-2.03874	0.0414764	0.0772319
UF2 - YS2	-2.88335	0.00393464	0.0106235
UF2.18 - YS2	-2.79598	0.00517425	0.0131266
YS1 - YS2	-3.88816	0.000101007	0.000449183

## Sheet: CEC
Comparison	Z	P.unadj	P.adj
CC1 - CC1.18	0.989982	0.322183	0.412831
CC1 - CC2	-1.48497	0.137551	0.207977
CC1.18 - CC2	-2.47496	0.0133253	0.0299819
CC1 - CC2.18	-0.931748	0.351467	0.442848
CC1.18 - CC2.18	-1.92173	0.0546397	0.0974237
CC2 - CC2.18	0.553225	0.580109	0.658502
CC1 - CJ1	2.8826	0.00394414	0.0103534
CC1.18 - CJ1	1.89261	0.0584094	0.103172
CC2 - CJ1	4.36757	1.25637e-05	7.65983e-05
CC2.18 - CJ1	3.81434	0.000136546	0.000593267
CC1 - CJ1.18	3.14465	0.00166286	0.0049493
CC1.18 - CJ1.18	2.15467	0.0311879	0.061083
CC2 - CJ1.18	4.62962	3.66333e-06	2.66296e-05
CC2.18 - CJ1.18	4.0764	4.57389e-05	0.000233639
CJ1 - CJ1.18	0.262054	0.79328	0.810432
CC1 - CJ2	2.05276	0.0400961	0.0750314
CC1.18 - CJ2	1.06277	0.287884	0.385887
CC2 - CJ2	3.53773	0.000403582	0.00149563
CC2.18 - CJ2	2.98451	0.00284037	0.0080124
CJ1 - CJ2	-0.829838	0.40663	0.502308
CJ1.18 - CJ2	-1.09189	0.274881	0.369768
CC1 - CJ2.18	2.62054	0.00877904	0.0204844
CC1.18 - CJ2.18	1.63056	0.102983	0.164948
CC2 - CJ2.18	4.10551	4.03416e-05	0.000208892
CC2.18 - CJ2.18	3.55229	0.000381895	0.00142927
CJ1 - CJ2.18	-0.262054	0.79328	0.812628
CJ1.18 - CJ2.18	-0.524108	0.600203	0.663383
CJ2 - CJ2.18	0.567784	0.570182	0.651144
CC1 - DG1	-0.436757	0.662288	0.719381
CC1.18 - DG1	-1.42674	0.153655	0.229572
CC2 - DG1	1.04822	0.294539	0.382597
CC2.18 - DG1	0.494991	0.620606	0.683934
CJ1 - DG1	-3.31935	0.000902266	0.00294014
CJ1.18 - DG1	-3.58141	0.00034175	0.00129181
CJ2 - DG1	-2.48951	0.0127918	0.0291283
CJ2.18 - DG1	-3.0573	0.00223342	0.00639571
CC1 - DG1.18	0.844397	0.398448	0.493814
CC1.18 - DG1.18	-0.145586	0.884249	0.888952
CC2 - DG1.18	2.32937	0.0198395	0.0414327
CC2.18 - DG1.18	1.77614	0.0757091	0.127759
CJ1 - DG1.18	-2.0382	0.0415301	0.0769528
CJ1.18 - DG1.18	-2.30025	0.0214339	0.0445166
CJ2 - DG1.18	-1.20836	0.226909	0.314181
CJ2.18 - DG1.18	-1.77614	0.0757091	0.128332
DG1 - DG1.18	1.28115	0.20014	0.280196
CC1 - DG2	-0.742487	0.457793	0.542463
CC1.18 - DG2	-1.73247	0.0831901	0.136721
CC2 - DG2	0.742487	0.457793	0.544168
CC2.18 - DG2	0.189261	0.849888	0.856687
CJ1 - DG2	-3.62508	0.00028887	0.00111421
CJ1.18 - DG2	-3.88714	0.000101434	0.000451083
CJ2 - DG2	-2.79524	0.00518606	0.0130689
CJ2.18 - DG2	-3.36303	0.000770926	0.00260188
DG1 - DG2	-0.30573	0.75981	0.800023
DG1.18 - DG2	-1.58688	0.112539	0.177991
CC1 - DG2.18	-0.189261	0.849888	0.858978
CC1.18 - DG2.18	-1.17924	0.238301	0.326369
CC2 - DG2.18	1.29571	0.195075	0.27412
CC2.18 - DG2.18	0.742487	0.457793	0.545885
CJ1 - DG2.18	-3.07186	0.00212732	0.00613837
CJ1.18 - DG2.18	-3.33391	0.000856342	0.00283945
CJ2 - DG2.18	-2.24202	0.0249602	0.0507255
CJ2.18 - DG2.18	-2.8098	0.00495719	0.0128344
DG1 - DG2.18	0.247496	0.804525	0.819704
DG1.18 - DG2.18	-1.03366	0.301296	0.388703
DG2 - DG2.18	0.553225	0.580109	0.660486
CC1 - IS1	-3.66876	0.000243732	0.000959695
CC1.18 - IS1	-4.65874	3.18151e-06	2.35806e-05
CC2 - IS1	-2.18378	0.0289781	0.0573493
CC2.18 - IS1	-2.73701	0.00620005	0.0154185
CJ1 - IS1	-6.55135	5.70182e-11	3.59215e-09
CJ1.18 - IS1	-6.81341	9.53141e-12	1.20096e-09
CJ2 - IS1	-5.72151	1.05579e-08	2.10046e-07
CJ2.18 - IS1	-6.2893	3.18904e-10	1.3394e-08
DG1 - IS1	-3.232	0.00122927	0.00393782
DG1.18 - IS1	-4.51315	6.38706e-06	4.31126e-05
DG2 - IS1	-2.92627	0.00343052	0.00926241
DG2.18 - IS1	-3.4795	0.000502358	0.00179143
CC1 - IS1.18	-3.93081	8.46596e-05	0.00039026
CC1.18 - IS1.18	-4.92079	8.61939e-07	7.75745e-06
CC2 - IS1.18	-2.44584	0.0144516	0.0317599
CC2.18 - IS1.18	-2.99906	0.00270811	0.00769673
CJ1 - IS1.18	-6.81341	9.53141e-12	1.80144e-09
CJ1.18 - IS1.18	-7.07546	1.48953e-12	5.63042e-10
CJ2 - IS1.18	-5.98357	2.18301e-09	5.89412e-08
CJ2.18 - IS1.18	-6.55135	5.70182e-11	4.31058e-09
DG1 - IS1.18	-3.49405	0.000475743	0.00171268
DG1.18 - IS1.18	-4.77521	1.79521e-06	1.50798e-05
DG2 - IS1.18	-3.18832	0.001431	0.00443374
DG2.18 - IS1.18	-3.74155	0.000182889	0.000759691
IS1 - IS1.18	-0.262054	0.79328	0.814836
CC1 - IS2	-3.4067	0.000657525	0.0022595
CC1.18 - IS2	-4.39669	1.09916e-05	6.81121e-05
CC2 - IS2	-1.92173	0.0546397	0.0978854
CC2.18 - IS2	-2.47496	0.0133253	0.0301614
CJ1 - IS2	-6.2893	3.18904e-10	1.50682e-08
CJ1.18 - IS2	-6.55135	5.70182e-11	5.38822e-09
CJ2 - IS2	-5.45946	4.77583e-08	7.22106e-07
CJ2.18 - IS2	-6.02724	1.66779e-09	4.84941e-08
DG1 - IS2	-2.96995	0.00297852	0.00827852
DG1.18 - IS2	-4.2511	2.12723e-05	0.000120014
DG2 - IS2	-2.66422	0.00771678	0.0185793
DG2.18 - IS2	-3.21744	0.00129339	0.00410842
IS1 - IS2	0.262054	0.79328	0.817057
IS1.18 - IS2	0.524108	0.600203	0.665328
CC1 - IS2.18	-3.14465	0.00166286	0.00498858
CC1.18 - IS2.18	-4.13463	3.55525e-05	0.00018665
CC2 - IS2.18	-1.65968	0.0969796	0.156659
CC2.18 - IS2.18	-2.2129	0.0269044	0.0540951
CJ1 - IS2.18	-6.02724	1.66779e-09	5.25353e-08
CJ1.18 - IS2.18	-6.2893	3.18904e-10	1.72208e-08
CJ2 - IS2.18	-5.19741	2.02088e-07	2.31483e-06
CJ2.18 - IS2.18	-5.76519	8.15657e-09	1.71288e-07
DG1 - IS2.18	-2.70789	0.0067712	0.0166202
DG1.18 - IS2.18	-3.98905	6.63396e-05	0.000317422
DG2 - IS2.18	-2.40216	0.0162985	0.0350046
DG2.18 - IS2.18	-2.95539	0.00312276	0.00861608
IS1 - IS2.18	0.524108	0.600203	0.667285
IS1.18 - IS2.18	0.786162	0.431772	0.519777
IS2 - IS2.18	0.262054	0.79328	0.819289
CC1 - JJ1	-2.8826	0.00394414	0.0104258
CC1.18 - JJ1	-3.87258	0.00010769	0.000473337
CC2 - JJ1	-1.39762	0.162227	0.238606
CC2.18 - JJ1	-1.95085	0.0510752	0.0928194
CJ1 - JJ1	-5.76519	8.15657e-09	1.81364e-07
CJ1.18 - JJ1	-6.02724	1.66779e-09	5.73112e-08
CJ2 - JJ1	-4.93535	8.00062e-07	7.37618e-06
CJ2.18 - JJ1	-5.50314	3.73094e-08	5.87623e-07
DG1 - JJ1	-2.44584	0.0144516	0.0319456
DG1.18 - JJ1	-3.72699	0.000193779	0.000796178
DG2 - JJ1	-2.14011	0.032346	0.0630247
DG2.18 - JJ1	-2.69333	0.00707414	0.0172518
IS1 - JJ1	0.786162	0.431772	0.521438
IS1.18 - JJ1	1.04822	0.294539	0.383916
IS2 - JJ1	0.524108	0.600203	0.669253
IS2.18 - JJ1	0.262054	0.79328	0.821534
CC1 - JJ2	0.61146	0.540895	0.621454
CC1.18 - JJ2	-0.378523	0.705042	0.759276
CC2 - JJ2	2.09643	0.0360438	0.0681228
CC2.18 - JJ2	1.54321	0.12278	0.189433
CJ1 - JJ2	-2.27114	0.0231388	0.0475351
CJ1.18 - JJ2	-2.53319	0.011303	0.0258941
CJ2 - JJ2	-1.4413	0.149501	0.225144
CJ2.18 - JJ2	-2.00908	0.0445285	0.0817076
DG1 - JJ2	1.04822	0.294539	0.385245
DG1.18 - JJ2	-0.232937	0.81581	0.828969
DG2 - JJ2	1.35395	0.175754	0.256505
DG2.18 - JJ2	0.800721	0.423293	0.519496
IS1 - JJ2	4.28022	1.86711e-05	0.000106935
IS1.18 - JJ2	4.54227	5.56514e-06	3.82477e-05
IS2 - JJ2	4.01816	5.86536e-05	0.000284245
IS2.18 - JJ2	3.75611	0.000172576	0.000724818
JJ1 - JJ2	3.49405	0.000475743	0.00172914
CC1 - MY1	-1.13557	0.256137	0.347025
CC1.18 - MY1	-2.12555	0.0335407	0.0650175
CC2 - MY1	0.349405	0.726785	0.771699
CC2.18 - MY1	-0.20382	0.838494	0.849734
CJ1 - MY1	-4.01816	5.86536e-05	0.000287936
CJ1.18 - MY1	-4.28022	1.86711e-05	0.00010858
CJ2 - MY1	-3.18832	0.001431	0.00447038
CJ2.18 - MY1	-3.75611	0.000172576	0.000732962
DG1 - MY1	-0.698811	0.48467	0.563709
DG1.18 - MY1	-1.97996	0.0477075	0.0871181
DG2 - MY1	-0.393081	0.69426	0.7498
DG2.18 - MY1	-0.946306	0.343992	0.43488
IS1 - MY1	2.53319	0.011303	0.026052
IS1.18 - MY1	2.79524	0.00518606	0.0131566
IS2 - MY1	2.27114	0.0231388	0.0477948
IS2.18 - MY1	2.00908	0.0445285	0.0821062
JJ1 - MY1	1.74703	0.0806326	0.13368
JJ2 - MY1	-1.74703	0.0806326	0.134269
CC1 - MY2	0.262054	0.79328	0.82379
CC1.18 - MY2	-0.727928	0.466658	0.551239
CC2 - MY2	1.74703	0.0806326	0.134863
CC2.18 - MY2	1.1938	0.232555	0.319658
CJ1 - MY2	-2.62054	0.00877904	0.0206116
CJ1.18 - MY2	-2.8826	0.00394414	0.0104992
CJ2 - MY2	-1.7907	0.073341	0.124878
CJ2.18 - MY2	-2.35849	0.0183496	0.0385342
DG1 - MY2	0.698811	0.48467	0.565449
DG1.18 - MY2	-0.582342	0.560336	0.641839
DG2 - MY2	1.00454	0.315118	0.405152
DG2.18 - MY2	0.451315	0.651762	0.712041
IS1 - MY2	3.93081	8.46596e-05	0.000395078
IS1.18 - MY2	4.19287	2.75453e-05	0.0001509
IS2 - MY2	3.66876	0.000243732	0.000969797
IS2.18 - MY2	3.4067	0.000657525	0.00228023
JJ1 - MY2	3.14465	0.00166286	0.00502849
JJ2 - MY2	-0.349405	0.726785	0.773872
MY1 - MY2	1.39762	0.162227	0.239538
CC1 - NJ1	-2.62054	0.00877904	0.0207405
CC1.18 - NJ1	-3.61052	0.00030558	0.00116676
CC2 - NJ1	-1.13557	0.256137	0.348273
CC2.18 - NJ1	-1.68879	0.0912591	0.149333
CJ1 - NJ1	-5.50314	3.73094e-08	6.13172e-07
CJ1.18 - NJ1	-5.76519	8.15657e-09	1.92699e-07
CJ2 - NJ1	-4.6733	2.96401e-06	2.24079e-05
CJ2.18 - NJ1	-5.24108	1.59638e-07	1.94655e-06
DG1 - NJ1	-2.18378	0.0289781	0.0576512
DG1.18 - NJ1	-3.46494	0.000530354	0.00187359
DG2 - NJ1	-1.87805	0.0603737	0.106145
DG2.18 - NJ1	-2.43128	0.0150456	0.0326853
IS1 - NJ1	1.04822	0.294539	0.386582
IS1.18 - NJ1	1.31027	0.190104	0.269136
IS2 - NJ1	0.786162	0.431772	0.523109
IS2.18 - NJ1	0.524108	0.600203	0.671233
JJ1 - NJ1	0.262054	0.79328	0.82606
JJ2 - NJ1	-3.232	0.00122927	0.00397148
MY1 - NJ1	-1.48497	0.137551	0.208812
MY2 - NJ1	-2.8826	0.00394414	0.0105737
CC1 - NJ2	-2.35849	0.0183496	0.0387494
CC1.18 - NJ2	-3.34847	0.000812593	0.00271823
CC2 - NJ2	-0.873514	0.382383	0.475463
CC2.18 - NJ2	-1.42674	0.153655	0.230483
CJ1 - NJ2	-5.24108	1.59638e-07	2.01143e-06
CJ1.18 - NJ2	-5.50314	3.73094e-08	6.41043e-07
CJ2 - NJ2	-4.41124	1.02778e-05	6.47504e-05
CJ2.18 - NJ2	-4.97903	6.39044e-07	6.19381e-06
DG1 - NJ2	-1.92173	0.0546397	0.0983515
DG1.18 - NJ2	-3.20288	0.00136059	0.00428586
DG2 - NJ2	-1.616	0.106094	0.169214
DG2.18 - NJ2	-2.16923	0.0300656	0.0591916
IS1 - NJ2	1.31027	0.190104	0.270148
IS1.18 - NJ2	1.57232	0.115875	0.179512
IS2 - NJ2	1.04822	0.294539	0.387929
IS2.18 - NJ2	0.786162	0.431772	0.524791
JJ1 - NJ2	0.524108	0.600203	0.673225
JJ2 - NJ2	-2.96995	0.00297852	0.00833984
MY1 - NJ2	-1.22292	0.22136	0.307626
MY2 - NJ2	-2.62054	0.00877904	0.0208709
NJ1 - NJ2	0.262054	0.79328	0.828342
CC1 - UF1	-2.09643	0.0360438	0.0684651
CC1.18 - UF1	-3.08642	0.00202586	0.00589057
CC2 - UF1	-0.61146	0.540895	0.623349
CC2.18 - UF1	-1.16468	0.244147	0.333168
CJ1 - UF1	-4.97903	6.39044e-07	6.35681e-06
CJ1.18 - UF1	-5.24108	1.59638e-07	2.08079e-06
CJ2 - UF1	-4.14919	3.33654e-05	0.000177635
CJ2.18 - UF1	-4.71697	2.39378e-06	1.8851e-05
DG1 - UF1	-1.65968	0.0969796	0.157332
DG1.18 - UF1	-2.94083	0.00327335	0.00896613
DG2 - UF1	-1.35395	0.175754	0.257499
DG2.18 - UF1	-1.90717	0.0564984	0.100265
IS1 - UF1	1.57232	0.115875	0.18025
IS1.18 - UF1	1.83438	0.0665978	0.113909
IS2 - UF1	1.31027	0.190104	0.271168
IS2.18 - UF1	1.04822	0.294539	0.389286
JJ1 - UF1	0.786162	0.431772	0.526484
JJ2 - UF1	-2.70789	0.0067712	0.0167288
MY1 - UF1	-0.960865	0.33662	0.426988
MY2 - UF1	-2.35849	0.0183496	0.0389671
NJ1 - UF1	0.524108	0.600203	0.675229
NJ2 - UF1	0.262054	0.79328	0.830636
CC1 - UF1.18	1.29571	0.195075	0.275143
CC1.18 - UF1.18	0.30573	0.75981	0.802258
CC2 - UF1.18	2.78069	0.00542443	0.013579
CC2.18 - UF1.18	2.22746	0.0259166	0.0523875
CJ1 - UF1.18	-1.58688	0.112539	0.178739
CJ1.18 - UF1.18	-1.84894	0.0644669	0.112297
CJ2 - UF1.18	-0.757045	0.449023	0.538827
CJ2.18 - UF1.18	-1.32483	0.185228	0.268261
DG1 - UF1.18	1.73247	0.0831901	0.137318
DG1.18 - UF1.18	0.451315	0.651762	0.714105
DG2 - UF1.18	2.0382	0.0415301	0.0773319
DG2.18 - UF1.18	1.48497	0.137551	0.209654
IS1 - UF1.18	4.96447	6.88891e-07	6.51002e-06
IS1.18 - UF1.18	5.22652	1.72727e-07	2.04034e-06
IS2 - UF1.18	4.70242	2.57102e-06	1.98336e-05
IS2.18 - UF1.18	4.44036	8.9808e-06	5.7538e-05
JJ1 - UF1.18	4.17831	2.93687e-05	0.000158591
JJ2 - UF1.18	0.684252	0.493816	0.572584
MY1 - UF1.18	2.43128	0.0150456	0.0328742
MY2 - UF1.18	1.03366	0.301296	0.390034
NJ1 - UF1.18	3.91625	8.99359e-05	0.000409587
NJ2 - UF1.18	3.6542	0.000257986	0.00100535
UF1 - UF1.18	3.39214	0.000693478	0.00236157
CC1 - UF2	1.65968	0.0969796	0.15801
CC1.18 - UF2	0.669694	0.503053	0.581511
CC2 - UF2	3.14465	0.00166286	0.00506904
CC2.18 - UF2	2.59142	0.00955797	0.0221651
CJ1 - UF2	-1.22292	0.22136	0.308761
CJ1.18 - UF2	-1.48497	0.137551	0.210503
CJ2 - UF2	-0.393081	0.69426	0.751949
CJ2.18 - UF2	-0.960865	0.33662	0.428425
DG1 - UF2	2.09643	0.0360438	0.0688109
DG1.18 - UF2	0.815279	0.414912	0.510869
DG2 - UF2	2.40216	0.0162985	0.0352047
DG2.18 - UF2	1.84894	0.0644669	0.112817
IS1 - UF2	5.32843	9.90635e-08	1.38689e-06
IS1.18 - UF2	5.59049	2.26433e-08	4.07579e-07
IS2 - UF2	5.06638	4.05453e-07	4.3789e-06
IS2.18 - UF2	4.80433	1.55274e-06	1.33395e-05
JJ1 - UF2	4.54227	5.56514e-06	3.8956e-05
JJ2 - UF2	1.04822	0.294539	0.390652
MY1 - UF2	2.79524	0.00518606	0.0132455
MY2 - UF2	1.39762	0.162227	0.240477
NJ1 - UF2	4.28022	1.86711e-05	0.000110276
NJ2 - UF2	4.01816	5.86536e-05	0.000291725
UF1 - UF2	3.75611	0.000172576	0.000741291
UF1.18 - UF2	0.363964	0.715885	0.768763
CC1 - UF2.18	2.18378	0.0289781	0.0579562
CC1.18 - UF2.18	1.1938	0.232555	0.320825
CC2 - UF2.18	3.66876	0.000243732	0.000980114
CC2.18 - UF2.18	3.11553	0.00183613	0.0053803
CJ1 - UF2.18	-0.698811	0.48467	0.567199
CJ1.18 - UF2.18	-0.960865	0.33662	0.429873
CJ2 - UF2.18	0.131027	0.895754	0.89813
CJ2.18 - UF2.18	-0.436757	0.662288	0.721455
DG1 - UF2.18	2.62054	0.00877904	0.021003
DG1.18 - UF2.18	1.33939	0.180445	0.262339
DG2 - UF2.18	2.92627	0.00343052	0.00932904
DG2.18 - UF2.18	2.37305	0.0176421	0.0376763
IS1 - UF2.18	5.85254	4.84117e-09	1.21997e-07
IS1.18 - UF2.18	6.1146	9.6802e-10	3.65912e-08
IS2 - UF2.18	5.59049	2.26433e-08	4.27958e-07
IS2.18 - UF2.18	5.32843	9.90635e-08	1.44023e-06
JJ1 - UF2.18	5.06638	4.05453e-07	4.50769e-06
JJ2 - UF2.18	1.57232	0.115875	0.180995
MY1 - UF2.18	3.31935	0.000902266	0.00296571
MY2 - UF2.18	1.92173	0.0546397	0.0988221
NJ1 - UF2.18	4.80433	1.55274e-06	1.36497e-05
NJ2 - UF2.18	4.54227	5.56514e-06	3.9691e-05
UF1 - UF2.18	4.28022	1.86711e-05	0.000112027
UF1.18 - UF2.18	0.888072	0.374502	0.468747
UF2 - UF2.18	0.524108	0.600203	0.677244
CC1 - YS1	1.31027	0.190104	0.272195
CC1.18 - YS1	0.320288	0.74875	0.792794
CC2 - YS1	2.79524	0.00518606	0.0133356
CC2.18 - YS1	2.24202	0.0249602	0.0509997
CJ1 - YS1	-1.57232	0.115875	0.181746
CJ1.18 - YS1	-1.83438	0.0665978	0.114427
CJ2 - YS1	-0.742487	0.457793	0.547613
CJ2.18 - YS1	-1.31027	0.190104	0.27323
DG1 - YS1	1.74703	0.0806326	0.135463
DG1.18 - YS1	0.465874	0.641306	0.704691
DG2 - YS1	2.05276	0.0400961	0.0754047
DG2.18 - YS1	1.49953	0.133736	0.205496
IS1 - YS1	4.97903	6.39044e-07	6.52861e-06
IS1.18 - YS1	5.24108	1.59638e-07	2.15511e-06
IS2 - YS1	4.71697	2.39378e-06	1.92521e-05
IS2.18 - YS1	4.45492	8.39246e-06	5.46957e-05
JJ1 - YS1	4.19287	2.75453e-05	0.000153119
JJ2 - YS1	0.698811	0.48467	0.568961
MY1 - YS1	2.44584	0.0144516	0.0321335
MY2 - YS1	1.04822	0.294539	0.392027
NJ1 - YS1	3.93081	8.46596e-05	0.000400017
NJ2 - YS1	3.66876	0.000243732	0.000990653
UF1 - YS1	3.4067	0.000657525	0.00230134
UF1.18 - YS1	0.0145586	0.988384	0.988384
UF2 - YS1	-0.349405	0.726785	0.776058
UF2.18 - YS1	-0.873514	0.382383	0.477032
CC1 - YS2	-1.83438	0.0665978	0.11495
CC1.18 - YS2	-2.82436	0.0047375	0.0123502
CC2 - YS2	-0.349405	0.726785	0.778257
CC2.18 - YS2	-0.902631	0.366722	0.460534
CJ1 - YS2	-4.71697	2.39378e-06	1.96707e-05
CJ1.18 - YS2	-4.97903	6.39044e-07	6.70996e-06
CJ2 - YS2	-3.88714	0.000101434	0.000456453
CJ2.18 - YS2	-4.45492	8.39246e-06	5.56552e-05
DG1 - YS2	-1.39762	0.162227	0.241424
DG1.18 - YS2	-2.67878	0.0073892	0.0179046
DG2 - YS2	-1.09189	0.274881	0.371089
DG2.18 - YS2	-1.64512	0.0999456	0.160764
IS1 - YS2	1.83438	0.0665978	0.115477
IS1.18 - YS2	2.09643	0.0360438	0.0691602
IS2 - YS2	1.57232	0.115875	0.182504
IS2.18 - YS2	1.31027	0.190104	0.274273
JJ1 - YS2	1.04822	0.294539	0.393412
JJ2 - YS2	-2.44584	0.0144516	0.0323236
MY1 - YS2	-0.698811	0.48467	0.570733
MY2 - YS2	-2.09643	0.0360438	0.0695131
NJ1 - YS2	0.786162	0.431772	0.528188
NJ2 - YS2	0.524108	0.600203	0.679272
UF1 - YS2	0.262054	0.79328	0.832944
UF1.18 - YS2	-3.13009	0.00174752	0.00516065
UF2 - YS2	-3.49405	0.000475743	0.00174593
UF2.18 - YS2	-4.01816	5.86536e-05	0.000295614
YS1 - YS2	-3.14465	0.00166286	0.00511025

## Sheet: Ca
Comparison	Z	P.unadj	P.adj
CC1 - CC1.18	0.786115	0.4318	0.516521
CC1 - CC2	1.1355	0.256166	0.347064
CC1.18 - CC2	0.349384	0.726801	0.769554
CC1 - CC2.18	1.77604	0.0757269	0.124999
CC1.18 - CC2.18	0.989922	0.322212	0.410088
CC2 - CC2.18	0.640538	0.521823	0.597725
CC1 - CJ1	1.92161	0.0546544	0.0956453
CC1.18 - CJ1	1.1355	0.256166	0.348313
CC2 - CJ1	0.786115	0.4318	0.51816
CC2.18 - CJ1	0.145577	0.884256	0.898518
CC1 - CJ1.18	1.95073	0.0510893	0.0902419
CC1.18 - CJ1.18	1.16461	0.244175	0.338089
CC2 - CJ1.18	0.81523	0.414941	0.509245
CC2.18 - CJ1.18	0.174692	0.861322	0.877573
CJ1 - CJ1.18	0.0291154	0.976773	0.979363
CC1 - CJ2	0.43673	0.662307	0.723561
CC1.18 - CJ2	-0.349384	0.726801	0.771716
CC2 - CJ2	-0.698768	0.484697	0.56723
CC2.18 - CJ2	-1.33931	0.180471	0.26339
CJ1 - CJ2	-1.48488	0.137575	0.205547
CJ1.18 - CJ2	-1.514	0.130026	0.198185
CC1 - CJ2.18	1.10638	0.268561	0.362557
CC1.18 - CJ2.18	0.320269	0.748765	0.790595
CC2 - CJ2.18	-0.0291154	0.976773	0.981968
CC2.18 - CJ2.18	-0.669653	0.503079	0.581541
CJ1 - CJ2.18	-0.81523	0.414941	0.510904
CJ1.18 - CJ2.18	-0.844345	0.398477	0.495474
CJ2 - CJ2.18	0.669653	0.503079	0.583325
CC1 - DG1	-2.00896	0.0445414	0.0805582
CC1.18 - DG1	-2.79507	0.00518879	0.0127361
CC2 - DG1	-3.14446	0.00166395	0.00491384
CC2.18 - DG1	-3.785	0.000153711	0.000624761
CJ1 - DG1	-3.93057	8.47438e-05	0.000376861
CJ1.18 - DG1	-3.95969	7.50478e-05	0.000345952
CJ2 - DG1	-2.44569	0.0144575	0.0315893
CJ2.18 - DG1	-3.11534	0.00183731	0.00538375
CC1 - DG1.18	-0.203807	0.838504	0.856634
CC1.18 - DG1.18	-0.989922	0.322212	0.411474
CC2 - DG1.18	-1.33931	0.180471	0.264411
CC2.18 - DG1.18	-1.97984	0.0477211	0.0850876
CJ1 - DG1.18	-2.12542	0.0335515	0.0650383
CJ1.18 - DG1.18	-2.15454	0.0311982	0.0611031
CJ2 - DG1.18	-0.640538	0.521823	0.599541
CJ2.18 - DG1.18	-1.31019	0.190131	0.271206
DG1 - DG1.18	1.80515	0.0710509	0.119366
CC1 - DG2	-2.70773	0.00677456	0.0164153
CC1.18 - DG2	-3.49384	0.000476122	0.00165114
CC2 - DG2	-3.84323	0.000121427	0.000515725
CC2.18 - DG2	-4.48376	7.33377e-06	4.69858e-05
CJ1 - DG2	-4.62934	3.66831e-06	2.61627e-05
CJ1.18 - DG2	-4.65846	3.18589e-06	2.50889e-05
CJ2 - DG2	-3.14446	0.00166395	0.00495254
CJ2.18 - DG2	-3.81411	0.000136674	0.000567722
DG1 - DG2	-0.698768	0.484697	0.568992
DG1.18 - DG2	-2.50392	0.0122826	0.0273107
CC1 - DG2.18	-3.26092	0.00111052	0.00344078
CC1.18 - DG2.18	-4.04703	5.18707e-05	0.000251373
CC2 - DG2.18	-4.39642	1.10052e-05	6.93326e-05
CC2.18 - DG2.18	-5.03696	4.72993e-07	4.96643e-06
CJ1 - DG2.18	-5.18253	2.18893e-07	2.43357e-06
CJ1.18 - DG2.18	-5.21165	1.8717e-07	2.14395e-06
CJ2 - DG2.18	-3.69765	0.000217605	0.000856819
CJ2.18 - DG2.18	-4.3673	1.2579e-05	7.66915e-05
DG1 - DG2.18	-1.25196	0.210584	0.295914
DG1.18 - DG2.18	-3.05711	0.00223481	0.00625746
DG2 - DG2.18	-0.553192	0.580132	0.658528
CC1 - IS1	-4.19261	2.75762e-05	0.000142792
CC1.18 - IS1	-4.97873	6.40044e-07	5.90089e-06
CC2 - IS1	-5.32811	9.92403e-08	1.29355e-06
CC2.18 - IS1	-5.96865	2.39229e-09	8.22076e-08
CJ1 - IS1	-6.11422	9.70279e-10	3.66765e-08
CJ1.18 - IS1	-6.14334	8.08043e-10	3.81801e-08
CJ2 - IS1	-4.62934	3.66831e-06	2.66658e-05
CJ2.18 - IS1	-5.29899	1.16442e-07	1.46717e-06
DG1 - IS1	-2.18365	0.0289879	0.0573687
DG1.18 - IS1	-3.9888	6.64074e-05	0.000309901
DG2 - IS1	-1.48488	0.137575	0.206362
DG2.18 - IS1	-0.931691	0.351496	0.442885
CC1 - IS1.18	-3.785	0.000153711	0.000631552
CC1.18 - IS1.18	-4.57111	4.85147e-06	3.21729e-05
CC2 - IS1.18	-4.92049	8.63258e-07	7.58864e-06
CC2.18 - IS1.18	-5.56103	2.68183e-08	4.40754e-07
CJ1 - IS1.18	-5.70661	1.15249e-08	2.42023e-07
CJ1.18 - IS1.18	-5.73572	9.70964e-09	2.15897e-07
CJ2 - IS1.18	-4.22173	2.42439e-05	0.000132814
CJ2.18 - IS1.18	-4.89138	1.00132e-06	8.60223e-06
DG1 - IS1.18	-1.77604	0.0757269	0.125547
DG1.18 - IS1.18	-3.58119	0.000342035	0.00124317
DG2 - IS1.18	-1.07727	0.281361	0.378485
DG2.18 - IS1.18	-0.524076	0.600225	0.675254
IS1 - IS1.18	0.407615	0.683556	0.744623
CC1 - IS2	-3.05711	0.00223481	0.00630416
CC1.18 - IS2	-3.84323	0.000121427	0.000521585
CC2 - IS2	-4.19261	2.75762e-05	0.000144775
CC2.18 - IS2	-4.83315	1.3439e-06	1.10434e-05
CJ1 - IS2	-4.97873	6.40044e-07	6.04842e-06
CJ1.18 - IS2	-5.00784	5.50441e-07	5.62342e-06
CJ2 - IS2	-3.49384	0.000476122	0.00166643
CJ2.18 - IS2	-4.1635	3.13412e-05	0.00015796
DG1 - IS2	-1.04815	0.294568	0.389324
DG1.18 - IS2	-2.8533	0.00432671	0.011202
DG2 - IS2	-0.349384	0.726801	0.773889
DG2.18 - IS2	0.203807	0.838504	0.858955
IS1 - IS2	1.1355	0.256166	0.34957
IS1.18 - IS2	0.727884	0.466685	0.552999
CC1 - IS2.18	-2.24188	0.024969	0.0504721
CC1.18 - IS2.18	-3.028	0.00246181	0.00679243
CC2 - IS2.18	-3.37738	0.000731796	0.00244796
CC2.18 - IS2.18	-4.01792	5.87144e-05	0.000280937
CJ1 - IS2.18	-4.1635	3.13412e-05	0.000160094
CJ1.18 - IS2.18	-4.19261	2.75762e-05	0.000146814
CJ2 - IS2.18	-2.67861	0.00739279	0.0177992
CJ2.18 - IS2.18	-3.34827	0.00081319	0.00267292
DG1 - IS2.18	-0.232923	0.815821	0.84257
DG1.18 - IS2.18	-2.03807	0.0415425	0.0769757
DG2 - IS2.18	0.465846	0.641326	0.713004
DG2.18 - IS2.18	1.01904	0.308185	0.398952
IS1 - IS2.18	1.95073	0.0510893	0.0906656
IS1.18 - IS2.18	1.54311	0.122803	0.189468
IS2 - IS2.18	0.81523	0.414941	0.512574
CC1 - JJ1	-4.80403	1.55501e-06	1.25063e-05
CC1.18 - JJ1	-5.59015	2.26876e-08	3.89815e-07
CC2 - JJ1	-5.93953	2.85837e-09	9.00386e-08
CC2.18 - JJ1	-6.58007	4.70228e-11	5.92487e-09
CJ1 - JJ1	-6.72565	1.74815e-11	3.30399e-09
CJ1.18 - JJ1	-6.75476	1.4307e-11	5.40805e-09
CJ2 - JJ1	-5.24076	1.59914e-07	1.88898e-06
CJ2.18 - JJ1	-5.91042	3.41244e-09	9.92231e-08
DG1 - JJ1	-2.79507	0.00518879	0.0128194
DG1.18 - JJ1	-4.60023	4.22033e-06	2.84872e-05
DG2 - JJ1	-2.09631	0.0360551	0.0691819
DG2.18 - JJ1	-1.54311	0.122803	0.190244
IS1 - JJ1	-0.611422	0.54092	0.617727
IS1.18 - JJ1	-1.01904	0.308185	0.400323
IS2 - JJ1	-1.74692	0.080651	0.131406
IS2.18 - JJ1	-2.56215	0.0104026	0.0239767
CC1 - JJ2	-3.49384	0.000476122	0.001682
CC1.18 - JJ2	-4.27996	1.8693e-05	0.000105462
CC2 - JJ2	-4.62934	3.66831e-06	2.71887e-05
CC2.18 - JJ2	-5.26988	1.36514e-07	1.66459e-06
CJ1 - JJ2	-5.41546	6.11328e-08	8.88777e-07
CJ1.18 - JJ2	-5.44457	5.19304e-08	8.17904e-07
CJ2 - JJ2	-3.93057	8.47438e-05	0.000381347
CJ2.18 - JJ2	-4.60023	4.22033e-06	2.90052e-05
DG1 - JJ2	-1.48488	0.137575	0.207184
DG1.18 - JJ2	-3.29003	0.00100175	0.00312943
DG2 - JJ2	-0.786115	0.4318	0.519811
DG2.18 - JJ2	-0.232923	0.815821	0.844878
IS1 - JJ2	0.698768	0.484697	0.570764
IS1.18 - JJ2	0.291154	0.770934	0.811735
IS2 - JJ2	-0.43673	0.662307	0.725658
IS2.18 - JJ2	-1.25196	0.210584	0.297018
JJ1 - JJ2	1.31019	0.190131	0.272233
CC1 - MY1	-1.74692	0.080651	0.131974
CC1.18 - MY1	-2.53304	0.0113079	0.0254429
CC2 - MY1	-2.88242	0.00394633	0.0104316
CC2.18 - MY1	-3.52296	0.000426759	0.00152184
CJ1 - MY1	-3.66853	0.000243945	0.00094093
CJ1.18 - MY1	-3.69765	0.000217605	0.000865838
CJ2 - MY1	-2.18365	0.0289879	0.0576706
CJ2.18 - MY1	-2.8533	0.00432671	0.0112793
DG1 - MY1	0.262038	0.793292	0.828355
DG1.18 - MY1	-1.54311	0.122803	0.191027
DG2 - MY1	0.960807	0.336649	0.425597
DG2.18 - MY1	1.514	0.130026	0.198988
IS1 - MY1	2.44569	0.0144575	0.031773
IS1.18 - MY1	2.03807	0.0415425	0.0773549
IS2 - MY1	1.31019	0.190131	0.273269
IS2.18 - MY1	0.494961	0.620628	0.694075
JJ1 - MY1	3.05711	0.00223481	0.00635156
JJ2 - MY1	1.74692	0.080651	0.132548
CC1 - MY2	-0.43673	0.662307	0.727768
CC1.18 - MY2	-1.22284	0.221388	0.307665
CC2 - MY2	-1.57223	0.115897	0.182538
CC2.18 - MY2	-2.21277	0.0269137	0.0541138
CJ1 - MY2	-2.35834	0.0183567	0.0387644
CJ1.18 - MY2	-2.38746	0.0169653	0.0364368
CJ2 - MY2	-0.873461	0.382412	0.477069
CJ2.18 - MY2	-1.54311	0.122803	0.191817
DG1 - MY2	1.57223	0.115897	0.183302
DG1.18 - MY2	-0.232923	0.815821	0.847199
DG2 - MY2	2.271	0.0231471	0.0472952
DG2.18 - MY2	2.82419	0.00474004	0.0120251
IS1 - MY2	3.75588	0.000172733	0.000694608
IS1.18 - MY2	3.34827	0.00081319	0.00269637
IS2 - MY2	2.62038	0.00878314	0.0206213
IS2.18 - MY2	1.80515	0.0710509	0.119898
JJ1 - MY2	4.3673	1.2579e-05	7.79487e-05
JJ2 - MY2	3.05711	0.00223481	0.00639968
MY1 - MY2	1.31019	0.190131	0.274312
CC1 - NJ1	-4.542	5.57244e-06	3.63169e-05
CC1.18 - NJ1	-5.32811	9.92403e-08	1.33974e-06
CC2 - NJ1	-5.67749	1.36682e-08	2.71926e-07
CC2.18 - NJ1	-6.31803	2.64916e-10	1.43055e-08
CJ1 - NJ1	-6.46361	1.02235e-10	7.72899e-09
CJ1.18 - NJ1	-6.49272	8.42982e-11	7.96618e-09
CJ2 - NJ1	-4.97873	6.40044e-07	6.2035e-06
CJ2.18 - NJ1	-5.64838	1.61968e-08	3.0612e-07
DG1 - NJ1	-2.53304	0.0113079	0.0255952
DG1.18 - NJ1	-4.33819	1.43663e-05	8.48507e-05
DG2 - NJ1	-1.83427	0.0666143	0.113938
DG2.18 - NJ1	-1.28108	0.200167	0.284448
IS1 - NJ1	-0.349384	0.726801	0.776076
IS1.18 - NJ1	-0.756999	0.44905	0.533777
IS2 - NJ1	-1.48488	0.137575	0.208013
IS2.18 - NJ1	-2.30011	0.0214418	0.0447791
JJ1 - NJ1	0.262038	0.793292	0.830649
JJ2 - NJ1	-1.04815	0.294568	0.390691
MY1 - NJ1	-2.79507	0.00518879	0.0129037
MY2 - NJ1	-4.10526	4.03852e-05	0.000200863
CC1 - NJ2	-2.271	0.0231471	0.0475523
CC1.18 - NJ2	-3.05711	0.00223481	0.00644853
CC2 - NJ2	-3.4065	0.000658024	0.00224084
CC2.18 - NJ2	-4.04703	5.18707e-05	0.000254638
CJ1 - NJ2	-4.19261	2.75762e-05	0.000148912
CJ1.18 - NJ2	-4.22173	2.42439e-05	0.000134767
CJ2 - NJ2	-2.70773	0.00677456	0.0165212
CJ2.18 - NJ2	-3.37738	0.000731796	0.00246981
DG1 - NJ2	-0.262038	0.793292	0.832957
DG1.18 - NJ2	-2.06719	0.0387162	0.0735414
DG2 - NJ2	0.43673	0.662307	0.729889
DG2.18 - NJ2	0.989922	0.322212	0.412869
IS1 - NJ2	1.92161	0.0546544	0.0960901
IS1.18 - NJ2	1.514	0.130026	0.199796
IS2 - NJ2	0.786115	0.4318	0.521471
IS2.18 - NJ2	-0.0291154	0.976773	0.984587
JJ1 - NJ2	2.53304	0.0113079	0.0257494
JJ2 - NJ2	1.22284	0.221388	0.3088
MY1 - NJ2	-0.524076	0.600225	0.677269
MY2 - NJ2	-1.83427	0.0666143	0.114456
NJ1 - NJ2	2.271	0.0231471	0.0478121
CC1 - UF1	-0.873461	0.382412	0.478648
CC1.18 - UF1	-1.65958	0.097	0.156025
CC2 - UF1	-2.00896	0.0445414	0.0809455
CC2.18 - UF1	-2.6495	0.00806117	0.0192856
CJ1 - UF1	-2.79507	0.00518879	0.0129891
CJ1.18 - UF1	-2.82419	0.00474004	0.0121063
CJ2 - UF1	-1.31019	0.190131	0.275363
CJ2.18 - UF1	-1.97984	0.0477211	0.0854908
DG1 - UF1	1.1355	0.256166	0.350837
DG1.18 - UF1	-0.669653	0.503079	0.58512
DG2 - UF1	1.83427	0.0666143	0.114978
DG2.18 - UF1	2.38746	0.0169653	0.036645
IS1 - UF1	3.31915	0.000902918	0.0028924
IS1.18 - UF1	2.91154	0.00359657	0.00957398
IS2 - UF1	2.18365	0.0289879	0.0579757
IS2.18 - UF1	1.36842	0.17118	0.252758
JJ1 - UF1	3.93057	8.47438e-05	0.000385942
JJ2 - UF1	2.62038	0.00878314	0.0207502
MY1 - UF1	0.873461	0.382412	0.480238
MY2 - UF1	-0.43673	0.662307	0.732023
NJ1 - UF1	3.66853	0.000243945	0.00095063
NJ2 - UF1	1.39754	0.162252	0.240515
CC1 - UF1.18	-1.25196	0.210584	0.298131
CC1.18 - UF1.18	-2.03807	0.0415425	0.0777379
CC2 - UF1.18	-2.38746	0.0169653	0.0368556
CC2.18 - UF1.18	-3.028	0.00246181	0.00684238
CJ1 - UF1.18	-3.17357	0.00150575	0.00455338
CJ1.18 - UF1.18	-3.20269	0.00136151	0.00418415
CJ2 - UF1.18	-1.68869	0.0912788	0.148083
CJ2.18 - UF1.18	-2.35834	0.0183567	0.0389822
DG1 - UF1.18	0.756999	0.44905	0.535461
DG1.18 - UF1.18	-1.04815	0.294568	0.392066
DG2 - UF1.18	1.45577	0.145457	0.216467
DG2.18 - UF1.18	2.00896	0.0445414	0.0813366
IS1 - UF1.18	2.94065	0.00327524	0.00878042
IS1.18 - UF1.18	2.53304	0.0113079	0.0259055
IS2 - UF1.18	1.80515	0.0710509	0.120436
IS2.18 - UF1.18	0.989922	0.322212	0.414273
JJ1 - UF1.18	3.55207	0.000382209	0.00137595
JJ2 - UF1.18	2.24188	0.024969	0.0507434
MY1 - UF1.18	0.494961	0.620628	0.696134
MY2 - UF1.18	-0.81523	0.414941	0.514254
NJ1 - UF1.18	3.29003	0.00100175	0.00315551
NJ2 - UF1.18	1.01904	0.308185	0.401704
UF1 - UF1.18	-0.3785	0.70506	0.763646
CC1 - UF2	-1.22284	0.221388	0.309944
CC1.18 - UF2	-2.00896	0.0445414	0.0817314
CC2 - UF2	-2.35834	0.0183567	0.0392024
CC2.18 - UF2	-2.99888	0.00270973	0.0074223
CJ1 - UF2	-3.14446	0.00166395	0.00499184
CJ1.18 - UF2	-3.17357	0.00150575	0.0045901
CJ2 - UF2	-1.65958	0.097	0.156692
CJ2.18 - UF2	-2.32923	0.019847	0.0416787
DG1 - UF2	0.786115	0.4318	0.523143
DG1.18 - UF2	-1.01904	0.308185	0.403093
DG2 - UF2	1.48488	0.137575	0.208849
DG2.18 - UF2	2.03807	0.0415425	0.0781246
IS1 - UF2	2.96977	0.00298027	0.00804672
IS1.18 - UF2	2.56215	0.0104026	0.0241238
IS2 - UF2	1.83427	0.0666143	0.115506
IS2.18 - UF2	1.01904	0.308185	0.404493
JJ1 - UF2	3.58119	0.000342035	0.00125523
JJ2 - UF2	2.271	0.0231471	0.0480748
MY1 - UF2	0.524076	0.600225	0.679297
MY2 - UF2	-0.786115	0.4318	0.524825
NJ1 - UF2	3.31915	0.000902918	0.00291712
NJ2 - UF2	1.04815	0.294568	0.393452
UF1 - UF2	-0.349384	0.726801	0.778274
UF1.18 - UF2	0.0291154	0.976773	0.987219
CC1 - UF2.18	-0.203807	0.838504	0.861289
CC1.18 - UF2.18	-0.989922	0.322212	0.415687
CC2 - UF2.18	-1.33931	0.180471	0.26544
CC2.18 - UF2.18	-1.97984	0.0477211	0.0858979
CJ1 - UF2.18	-2.12542	0.0335515	0.0653736
CJ1.18 - UF2.18	-2.15454	0.0311982	0.0614214
CJ2 - UF2.18	-0.640538	0.521823	0.601369
CJ2.18 - UF2.18	-1.31019	0.190131	0.276422
DG1 - UF2.18	1.80515	0.0710509	0.120979
DG1.18 - UF2.18	0	1	1
DG2 - UF2.18	2.50392	0.0122826	0.0274723
DG2.18 - UF2.18	3.05711	0.00223481	0.00649813
IS1 - UF2.18	3.9888	6.64074e-05	0.000313775
IS1.18 - UF2.18	3.58119	0.000342035	0.00126754
IS2 - UF2.18	2.8533	0.00432671	0.0113576
IS2.18 - UF2.18	2.03807	0.0415425	0.0785153
JJ1 - UF2.18	4.60023	4.22033e-06	2.95423e-05
JJ2 - UF2.18	3.29003	0.00100175	0.00318203
MY1 - UF2.18	1.54311	0.122803	0.192612
MY2 - UF2.18	0.232923	0.815821	0.849533
NJ1 - UF2.18	4.33819	1.43663e-05	8.61975e-05
NJ2 - UF2.18	2.06719	0.0387162	0.0739128
UF1 - UF2.18	0.669653	0.503079	0.586925
UF1.18 - UF2.18	1.04815	0.294568	0.394847
UF2 - UF2.18	1.01904	0.308185	0.405903
CC1 - YS1	1.57223	0.115897	0.184072
CC1.18 - YS1	0.786115	0.4318	0.526518
CC2 - YS1	0.43673	0.662307	0.73417
CC2.18 - YS1	-0.203807	0.838504	0.863636
CJ1 - YS1	-0.349384	0.726801	0.780485
CJ1.18 - YS1	-0.3785	0.70506	0.76584
CJ2 - YS1	1.1355	0.256166	0.352112
CJ2.18 - YS1	0.465846	0.641326	0.715107
DG1 - YS1	3.58119	0.000342035	0.00128009
DG1.18 - YS1	1.77604	0.0757269	0.1261
DG2 - YS1	4.27996	1.8693e-05	0.00010706
DG2.18 - YS1	4.83315	1.3439e-06	1.12888e-05
IS1 - YS1	5.76484	8.17354e-09	1.931e-07
IS1.18 - YS1	5.35722	8.45099e-08	1.18314e-06
IS2 - YS1	4.62934	3.66831e-06	2.77324e-05
IS2.18 - YS1	3.81411	0.000136674	0.00057403
JJ1 - YS1	6.37626	1.81462e-10	1.14321e-08
JJ2 - YS1	5.06607	4.0611e-07	4.38598e-06
MY1 - YS1	3.31915	0.000902918	0.00294227
MY2 - YS1	2.00896	0.0445414	0.0821301
NJ1 - YS1	6.11422	9.70279e-10	4.07517e-08
NJ2 - YS1	3.84323	0.000121427	0.000527581
UF1 - YS1	2.44569	0.0144575	0.0319588
UF1.18 - YS1	2.82419	0.00474004	0.0121887
UF2 - YS1	2.79507	0.00518879	0.0130757
UF2.18 - YS1	1.77604	0.0757269	0.126658
CC1 - YS2	-3.84323	0.000121427	0.000533715
CC1.18 - YS2	-4.62934	3.66831e-06	2.82984e-05
CC2 - YS2	-4.97873	6.40044e-07	6.36675e-06
CC2.18 - YS2	-5.61926	1.91774e-08	3.45193e-07
CJ1 - YS2	-5.76484	8.17354e-09	2.05973e-07
CJ1.18 - YS2	-5.79396	6.87478e-09	1.85619e-07
CJ2 - YS2	-4.27996	1.8693e-05	0.000108707
CJ2.18 - YS2	-4.94961	7.43623e-07	6.69261e-06
DG1 - YS2	-1.83427	0.0666143	0.116038
DG1.18 - YS2	-3.63942	0.000273254	0.0010329
DG2 - YS2	-1.1355	0.256166	0.353397
DG2.18 - YS2	-0.582307	0.56036	0.638
IS1 - YS2	0.349384	0.726801	0.782709
IS1.18 - YS2	-0.0582307	0.953565	0.966347
IS2 - YS2	-0.786115	0.4318	0.528222
IS2.18 - YS2	-1.60134	0.109301	0.175066
JJ1 - YS2	0.960807	0.336649	0.427025
JJ2 - YS2	-0.349384	0.726801	0.784945
MY1 - YS2	-2.09631	0.0360551	0.0695349
MY2 - YS2	-3.4065	0.000658024	0.00226121
NJ1 - YS2	0.698768	0.484697	0.572548
NJ2 - YS2	-1.57223	0.115897	0.184849
UF1 - YS2	-2.96977	0.00298027	0.00810461
UF1.18 - YS2	-2.59127	0.00956234	0.0223121
UF2 - YS2	-2.62038	0.00878314	0.0208807
UF2.18 - YS2	-3.63942	0.000273254	0.00104333
YS1 - YS2	-5.41546	6.11328e-08	9.24328e-07

## Sheet: Mg
Comparison	Z	P.unadj	P.adj
CC1 - CC1.18	0.203807	0.838504	0.858955
CC1 - CC2	0.262038	0.793292	0.819302
CC1.18 - CC2	0.0582307	0.953565	0.958637
CC1 - CC2.18	-0.291154	0.770934	0.818576
CC1.18 - CC2.18	-0.494961	0.620628	0.683957
CC2 - CC2.18	-0.553192	0.580132	0.654597
CC1 - CJ1	-0.786115	0.4318	0.51816
CC1.18 - CJ1	-0.989922	0.322212	0.415687
CC2 - CJ1	-1.04815	0.294568	0.383954
CC2.18 - CJ1	-0.494961	0.620628	0.685957
CC1 - CJ1.18	-0.698768	0.484697	0.56374
CC1.18 - CJ1.18	-0.902576	0.366751	0.462106
CC2 - CJ1.18	-0.960807	0.336649	0.427025
CC2.18 - CJ1.18	-0.407615	0.683556	0.740356
CJ1 - CJ1.18	0.0873461	0.930396	0.940347
CC1 - CJ2	-4.3673	1.2579e-05	7.42948e-05
CC1.18 - CJ2	-4.57111	4.85147e-06	3.39603e-05
CC2 - CJ2	-4.62934	3.66831e-06	2.61627e-05
CC2.18 - CJ2	-4.07615	4.57876e-05	0.000219085
CJ1 - CJ2	-3.58119	0.000342035	0.00125523
CJ1.18 - CJ2	-3.66853	0.000243945	0.00094093
CC1 - CJ2.18	-4.22173	2.42439e-05	0.000134767
CC1.18 - CJ2.18	-4.42553	9.62042e-06	6.06086e-05
CC2 - CJ2.18	-4.48376	7.33377e-06	4.95029e-05
CC2.18 - CJ2.18	-3.93057	8.47438e-05	0.000376861
CJ1 - CJ2.18	-3.43561	0.000591218	0.00205028
CJ1.18 - CJ2.18	-3.52296	0.000426759	0.00153633
CJ2 - CJ2.18	0.145577	0.884256	0.898518
CC1 - DG1	-1.31019	0.190131	0.267173
CC1.18 - DG1	-1.514	0.130026	0.195816
CC2 - DG1	-1.57223	0.115897	0.178813
CC2.18 - DG1	-1.01904	0.308185	0.398952
CJ1 - DG1	-0.524076	0.600225	0.667309
CJ1.18 - DG1	-0.611422	0.54092	0.617727
CJ2 - DG1	3.05711	0.00223481	0.00621145
CJ2.18 - DG1	2.91154	0.00359657	0.00971075
CC1 - DG1.18	-1.514	0.130026	0.1966
CC1.18 - DG1.18	-1.71781	0.085832	0.139847
CC2 - DG1.18	-1.77604	0.0757269	0.127789
CC2.18 - DG1.18	-1.22284	0.221388	0.303206
CJ1 - DG1.18	-0.727884	0.466685	0.554738
CJ1.18 - DG1.18	-0.81523	0.414941	0.510904
CJ2 - DG1.18	2.8533	0.00432671	0.0112793
CJ2.18 - DG1.18	2.70773	0.00677456	0.0165212
DG1 - DG1.18	-0.203807	0.838504	0.861289
CC1 - DG2	-3.14446	0.00166395	0.00495254
CC1.18 - DG2	-3.34827	0.00081319	0.00267292
CC2 - DG2	-3.4065	0.000658024	0.00224084
CC2.18 - DG2	-2.8533	0.00432671	0.0113576
CJ1 - DG2	-2.35834	0.0183567	0.0383361
CJ1.18 - DG2	-2.44569	0.0144575	0.0321468
CJ2 - DG2	1.22284	0.221388	0.304308
CJ2.18 - DG2	1.07727	0.281361	0.379837
DG1 - DG2	-1.83427	0.0666143	0.114456
DG1.18 - DG2	-1.63046	0.103004	0.164982
CC1 - DG2.18	-3.93057	8.47438e-05	0.000381347
CC1.18 - DG2.18	-4.13438	3.55914e-05	0.000179381
CC2 - DG2.18	-4.19261	2.75762e-05	0.000144775
CC2.18 - DG2.18	-3.63942	0.000273254	0.0010329
CJ1 - DG2.18	-3.14446	0.00166395	0.00499184
CJ1.18 - DG2.18	-3.2318	0.00123011	0.00384283
CJ2 - DG2.18	0.43673	0.662307	0.721476
CJ2.18 - DG2.18	0.291154	0.770934	0.820882
DG1 - DG2.18	-2.62038	0.00878314	0.0208807
DG1.18 - DG2.18	-2.41657	0.0156673	0.0340359
DG2 - DG2.18	-0.786115	0.4318	0.519811
CC1 - IS1	-6.20157	5.59026e-10	2.11312e-08
CC1.18 - IS1	-6.40538	1.49998e-10	1.13398e-08
CC2 - IS1	-6.46361	1.02235e-10	9.66123e-09
CC2.18 - IS1	-5.91042	3.41244e-09	8.06188e-08
CJ1 - IS1	-5.41546	6.11328e-08	8.88777e-07
CJ1.18 - IS1	-5.5028	3.73803e-08	5.88739e-07
CJ2 - IS1	-1.83427	0.0666143	0.114978
CJ2.18 - IS1	-1.97984	0.0477211	0.0854908
DG1 - IS1	-4.89138	1.00132e-06	9.01186e-06
DG1.18 - IS1	-4.68757	2.76466e-06	2.17717e-05
DG2 - IS1	-3.05711	0.00223481	0.00625746
DG2.18 - IS1	-2.271	0.0231471	0.0460506
CC1 - IS1.18	-5.93953	2.85837e-09	7.20309e-08
CC1.18 - IS1.18	-6.14334	8.08043e-10	2.77673e-08
CC2 - IS1.18	-6.20157	5.59026e-10	2.34791e-08
CC2.18 - IS1.18	-5.64838	1.61968e-08	2.78291e-07
CJ1 - IS1.18	-5.15342	2.55782e-07	2.84369e-06
CJ1.18 - IS1.18	-5.24076	1.59914e-07	1.88898e-06
CJ2 - IS1.18	-1.57223	0.115897	0.179546
CJ2.18 - IS1.18	-1.71781	0.085832	0.140452
DG1 - IS1.18	-4.62934	3.66831e-06	2.66658e-05
DG1.18 - IS1.18	-4.42553	9.62042e-06	6.16359e-05
DG2 - IS1.18	-2.79507	0.00518879	0.0129037
DG2.18 - IS1.18	-2.00896	0.0445414	0.0801746
IS1 - IS1.18	0.262038	0.793292	0.821546
CC1 - IS2	-5.67749	1.36682e-08	2.46028e-07
CC1.18 - IS2	-5.8813	4.07053e-09	9.05095e-08
CC2 - IS2	-5.93953	2.85837e-09	7.7176e-08
CC2.18 - IS2	-5.38634	7.19068e-08	1.00669e-06
CJ1 - IS2	-4.89138	1.00132e-06	9.23166e-06
CJ1.18 - IS2	-4.97873	6.40044e-07	6.2035e-06
CJ2 - IS2	-1.31019	0.190131	0.26817
CJ2.18 - IS2	-1.45577	0.145457	0.213111
DG1 - IS2	-4.3673	1.2579e-05	7.54741e-05
DG1.18 - IS2	-4.1635	3.13412e-05	0.000162287
DG2 - IS2	-2.53304	0.0113079	0.0255952
DG2.18 - IS2	-1.74692	0.080651	0.132548
IS1 - IS2	0.524076	0.600225	0.669278
IS1.18 - IS2	0.262038	0.793292	0.823803
CC1 - IS2.18	-6.02688	1.67157e-09	5.26545e-08
CC1.18 - IS2.18	-6.23069	4.64399e-10	2.19428e-08
CC2 - IS2.18	-6.28892	3.1969e-10	1.72633e-08
CC2.18 - IS2.18	-5.73572	9.70964e-09	1.93171e-07
CJ1 - IS2.18	-5.24076	1.59914e-07	1.94991e-06
CJ1.18 - IS2.18	-5.32811	9.92403e-08	1.29355e-06
CJ2 - IS2.18	-1.65958	0.097	0.156692
CJ2.18 - IS2.18	-1.80515	0.0710509	0.120979
DG1 - IS2.18	-4.71669	2.39716e-06	1.96984e-05
DG1.18 - IS2.18	-4.51288	6.39533e-06	4.39534e-05
DG2 - IS2.18	-2.88242	0.00394633	0.0104316
DG2.18 - IS2.18	-2.09631	0.0360551	0.0674695
IS1 - IS2.18	0.174692	0.861322	0.879945
IS1.18 - IS2.18	-0.0873461	0.930396	0.942868
IS2 - IS2.18	-0.349384	0.726801	0.780485
CC1 - JJ1	-4.97873	6.40044e-07	6.36675e-06
CC1.18 - JJ1	-5.18253	2.18893e-07	2.50732e-06
CC2 - JJ1	-5.24076	1.59914e-07	2.01491e-06
CC2.18 - JJ1	-4.68757	2.76466e-06	2.22349e-05
CJ1 - JJ1	-4.19261	2.75762e-05	0.000146814
CJ1.18 - JJ1	-4.27996	1.8693e-05	0.000105462
CJ2 - JJ1	-0.611422	0.54092	0.619599
CJ2.18 - JJ1	-0.756999	0.44905	0.535461
DG1 - JJ1	-3.66853	0.000243945	0.00095063
DG1.18 - JJ1	-3.46473	0.00053077	0.0018577
DG2 - JJ1	-1.83427	0.0666143	0.115506
DG2.18 - JJ1	-1.04815	0.294568	0.385283
IS1 - JJ1	1.22284	0.221388	0.305419
IS1.18 - JJ1	0.960807	0.336649	0.428463
IS2 - JJ1	0.698768	0.484697	0.56548
IS2.18 - JJ1	1.04815	0.294568	0.386621
CC1 - JJ2	-3.93057	8.47438e-05	0.000385942
CC1.18 - JJ2	-4.13438	3.55914e-05	0.000181805
CC2 - JJ2	-4.19261	2.75762e-05	0.000148912
CC2.18 - JJ2	-3.63942	0.000273254	0.00104333
CJ1 - JJ2	-3.14446	0.00166395	0.00503178
CJ1.18 - JJ2	-3.2318	0.00123011	0.00387486
CJ2 - JJ2	0.43673	0.662307	0.723561
CJ2.18 - JJ2	0.291154	0.770934	0.823201
DG1 - JJ2	-2.62038	0.00878314	0.0210128
DG1.18 - JJ2	-2.41657	0.0156673	0.0342327
DG2 - JJ2	-0.786115	0.4318	0.521471
DG2.18 - JJ2	0	1	1
IS1 - JJ2	2.271	0.0231471	0.0462943
IS1.18 - JJ2	2.00896	0.0445414	0.0805582
IS2 - JJ2	1.74692	0.080651	0.133127
IS2.18 - JJ2	2.09631	0.0360551	0.0678051
JJ1 - JJ2	1.04815	0.294568	0.387968
CC1 - MY1	-4.62934	3.66831e-06	2.71887e-05
CC1.18 - MY1	-4.83315	1.3439e-06	1.18139e-05
CC2 - MY1	-4.89138	1.00132e-06	9.46246e-06
CC2.18 - MY1	-4.33819	1.43663e-05	8.35453e-05
CJ1 - MY1	-3.84323	0.000121427	0.000498908
CJ1.18 - MY1	-3.93057	8.47438e-05	0.000390648
CJ2 - MY1	-0.262038	0.793292	0.826073
CJ2.18 - MY1	-0.407615	0.683556	0.742484
DG1 - MY1	-3.31915	0.000902918	0.0028924
DG1.18 - MY1	-3.11534	0.00183731	0.00538375
DG2 - MY1	-1.48488	0.137575	0.202347
DG2.18 - MY1	-0.698768	0.484697	0.56723
IS1 - MY1	1.57223	0.115897	0.180285
IS1.18 - MY1	1.31019	0.190131	0.269175
IS2 - MY1	1.04815	0.294568	0.389324
IS2.18 - MY1	1.39754	0.162252	0.23589
JJ1 - MY1	0.349384	0.726801	0.782709
JJ2 - MY1	-0.698768	0.484697	0.568992
CC1 - MY2	-2.18365	0.0289879	0.0567742
CC1.18 - MY2	-2.38746	0.0169653	0.0364368
CC2 - MY2	-2.44569	0.0144575	0.032337
CC2.18 - MY2	-1.8925	0.0584247	0.103683
CJ1 - MY2	-1.39754	0.162252	0.2368
CJ1.18 - MY2	-1.48488	0.137575	0.203138
CJ2 - MY2	2.18365	0.0289879	0.0570699
CJ2.18 - MY2	2.03807	0.0415425	0.0762284
DG1 - MY2	-0.873461	0.382412	0.478648
DG1.18 - MY2	-0.669653	0.503079	0.583325
DG2 - MY2	0.960807	0.336649	0.42991
DG2.18 - MY2	1.74692	0.080651	0.133711
IS1 - MY2	4.01792	5.87144e-05	0.000277426
IS1.18 - MY2	3.75588	0.000172733	0.000694608
IS2 - MY2	3.49384	0.000476122	0.001682
IS2.18 - MY2	3.84323	0.000121427	0.00050439
JJ1 - MY2	2.79507	0.00518879	0.0129891
JJ2 - MY2	1.74692	0.080651	0.1343
MY1 - MY2	2.44569	0.0144575	0.0325295
CC1 - NJ1	-6.6383	3.17321e-11	3.99824e-09
CC1.18 - NJ1	-6.84211	7.80363e-12	1.47489e-09
CC2 - NJ1	-6.90034	5.18787e-12	1.96102e-09
CC2.18 - NJ1	-6.34715	2.19345e-10	1.38187e-08
CJ1 - NJ1	-5.85219	4.85154e-09	1.01882e-07
CJ1.18 - NJ1	-5.93953	2.85837e-09	8.31126e-08
CJ2 - NJ1	-2.271	0.0231471	0.0465405
CJ2.18 - NJ1	-2.41657	0.0156673	0.0344317
DG1 - NJ1	-5.32811	9.92403e-08	1.33974e-06
DG1.18 - NJ1	-5.1243	2.98642e-07	3.13574e-06
DG2 - NJ1	-3.49384	0.000476122	0.00169787
DG2.18 - NJ1	-2.70773	0.00677456	0.0166285
IS1 - NJ1	-0.43673	0.662307	0.725658
IS1.18 - NJ1	-0.698768	0.484697	0.570764
IS2 - NJ1	-0.960807	0.336649	0.431368
IS2.18 - NJ1	-0.611422	0.54092	0.621483
JJ1 - NJ1	-1.65958	0.097	0.157365
JJ2 - NJ1	-2.70773	0.00677456	0.0167371
MY1 - NJ1	-2.00896	0.0445414	0.0809455
MY2 - NJ1	-4.45465	8.40306e-06	5.47647e-05
CC1 - NJ2	-5.41546	6.11328e-08	9.24328e-07
CC1.18 - NJ2	-5.61926	1.91774e-08	3.15176e-07
CC2 - NJ2	-5.67749	1.36682e-08	2.5833e-07
CC2.18 - NJ2	-5.1243	2.98642e-07	3.22533e-06
CJ1 - NJ2	-4.62934	3.66831e-06	2.77324e-05
CJ1.18 - NJ2	-4.71669	2.39716e-06	2.01361e-05
CJ2 - NJ2	-1.04815	0.294568	0.390691
CJ2.18 - NJ2	-1.19373	0.232584	0.317389
DG1 - NJ2	-4.10526	4.03852e-05	0.000195713
DG1.18 - NJ2	-3.90146	9.56153e-05	0.000420263
DG2 - NJ2	-2.271	0.0231471	0.0467894
DG2.18 - NJ2	-1.48488	0.137575	0.203934
IS1 - NJ2	0.786115	0.4318	0.523143
IS1.18 - NJ2	0.524076	0.600225	0.671258
IS2 - NJ2	0.262038	0.793292	0.828355
IS2.18 - NJ2	0.611422	0.54092	0.623377
JJ1 - NJ2	-0.43673	0.662307	0.727768
JJ2 - NJ2	-1.48488	0.137575	0.204737
MY1 - NJ2	-0.786115	0.4318	0.524825
MY2 - NJ2	-3.2318	0.00123011	0.00390742
NJ1 - NJ2	1.22284	0.221388	0.306538
CC1 - UF1	-1.83427	0.0666143	0.116038
CC1.18 - UF1	-2.03807	0.0415425	0.0766002
CC2 - UF1	-2.09631	0.0360551	0.0681442
CC2.18 - UF1	-1.54311	0.122803	0.187176
CJ1 - UF1	-1.04815	0.294568	0.392066
CJ1.18 - UF1	-1.1355	0.256166	0.348313
CJ2 - UF1	2.53304	0.0113079	0.0257494
CJ2.18 - UF1	2.38746	0.0169653	0.036645
DG1 - UF1	-0.524076	0.600225	0.67325
DG1.18 - UF1	-0.320269	0.748765	0.801793
DG2 - UF1	1.31019	0.190131	0.270187
DG2.18 - UF1	2.09631	0.0360551	0.0684866
IS1 - UF1	4.3673	1.2579e-05	7.66915e-05
IS1.18 - UF1	4.10526	4.03852e-05	0.000198255
IS2 - UF1	3.84323	0.000121427	0.000509995
IS2.18 - UF1	4.19261	2.75762e-05	0.00015107
JJ1 - UF1	3.14446	0.00166395	0.00507236
JJ2 - UF1	2.09631	0.0360551	0.0688325
MY1 - UF1	2.79507	0.00518879	0.0130757
MY2 - UF1	0.349384	0.726801	0.784945
NJ1 - UF1	4.80403	1.55501e-06	1.3359e-05
NJ2 - UF1	3.58119	0.000342035	0.00126754
CC1 - UF1.18	-3.11534	0.00183731	0.00542581
CC1.18 - UF1.18	-3.31915	0.000902918	0.00291712
CC2 - UF1.18	-3.37738	0.000731796	0.00244796
CC2.18 - UF1.18	-2.82419	0.00474004	0.0121887
CJ1 - UF1.18	-2.32923	0.019847	0.0409954
CJ1.18 - UF1.18	-2.41657	0.0156673	0.034633
CJ2 - UF1.18	1.25196	0.210584	0.29265
CJ2.18 - UF1.18	1.10638	0.268561	0.363856
DG1 - UF1.18	-1.80515	0.0710509	0.121526
DG1.18 - UF1.18	-1.60134	0.109301	0.172869
DG2 - UF1.18	0.0291154	0.976773	0.979363
DG2.18 - UF1.18	0.81523	0.414941	0.512574
IS1 - UF1.18	3.08623	0.00202714	0.00580498
IS1.18 - UF1.18	2.82419	0.00474004	0.0122722
IS2 - UF1.18	2.56215	0.0104026	0.0242727
IS2.18 - UF1.18	2.91154	0.00359657	0.00978061
JJ1 - UF1.18	1.86338	0.0624085	0.110236
JJ2 - UF1.18	0.81523	0.414941	0.514254
MY1 - UF1.18	1.514	0.130026	0.197389
MY2 - UF1.18	-0.931691	0.351496	0.444366
NJ1 - UF1.18	3.52296	0.000426759	0.00155111
NJ2 - UF1.18	2.30011	0.0214418	0.0438109
UF1 - UF1.18	-1.28108	0.200167	0.2792
CC1 - UF2	-1.57223	0.115897	0.18103
CC1.18 - UF2	-1.77604	0.0757269	0.128362
CC2 - UF2	-1.83427	0.0666143	0.116575
CC2.18 - UF2	-1.28108	0.200167	0.280234
CJ1 - UF2	-0.786115	0.4318	0.526518
CJ1.18 - UF2	-0.873461	0.382412	0.480238
CJ2 - UF2	2.79507	0.00518879	0.0131635
CJ2.18 - UF2	2.6495	0.00806117	0.0194084
DG1 - UF2	-0.262038	0.793292	0.830649
DG1.18 - UF2	-0.0582307	0.953565	0.961193
DG2 - UF2	1.57223	0.115897	0.181781
DG2.18 - UF2	2.35834	0.0183567	0.0385491
IS1 - UF2	4.62934	3.66831e-06	2.82984e-05
IS1.18 - UF2	4.3673	1.2579e-05	7.79487e-05
IS2 - UF2	4.10526	4.03852e-05	0.000200863
IS2.18 - UF2	4.45465	8.40306e-06	5.57255e-05
JJ1 - UF2	3.4065	0.000658024	0.00226121
JJ2 - UF2	2.35834	0.0183567	0.0387644
MY1 - UF2	3.05711	0.00223481	0.00630416
MY2 - UF2	0.611422	0.54092	0.625284
NJ1 - UF2	5.06607	4.0611e-07	4.1489e-06
NJ2 - UF2	3.84323	0.000121427	0.000515725
UF1 - UF2	0.262038	0.793292	0.832957
UF1.18 - UF2	1.54311	0.122803	0.187934
CC1 - UF2.18	-2.32923	0.019847	0.0412206
CC1.18 - UF2.18	-2.53304	0.0113079	0.0259055
CC2 - UF2.18	-2.59127	0.00956234	0.0224507
CC2.18 - UF2.18	-2.03807	0.0415425	0.0769757
CJ1 - UF2.18	-1.54311	0.122803	0.188698
CJ1.18 - UF2.18	-1.63046	0.103004	0.165684
CJ2 - UF2.18	2.03807	0.0415425	0.0773549
CJ2.18 - UF2.18	1.8925	0.0584247	0.104172
DG1 - UF2.18	-1.01904	0.308185	0.400323
DG1.18 - UF2.18	-0.81523	0.414941	0.515946
DG2 - UF2.18	0.81523	0.414941	0.517649
DG2.18 - UF2.18	1.60134	0.109301	0.173595
IS1 - UF2.18	3.87234	0.000107795	0.000463027
IS1.18 - UF2.18	3.6103	0.000305839	0.00114462
IS2 - UF2.18	3.34827	0.00081319	0.00269637
IS2.18 - UF2.18	3.69765	0.000217605	0.000865838
JJ1 - UF2.18	2.6495	0.00806117	0.0195328
JJ2 - UF2.18	1.60134	0.109301	0.174328
MY1 - UF2.18	2.30011	0.0214418	0.044049
MY2 - UF2.18	-0.145577	0.884256	0.90094
NJ1 - UF2.18	4.30907	1.63941e-05	9.38934e-05
NJ2 - UF2.18	3.08623	0.00202714	0.0058493
UF1 - UF2.18	-0.494961	0.620628	0.687968
UF1.18 - UF2.18	0.786115	0.4318	0.528222
UF2 - UF2.18	-0.756999	0.44905	0.537155
CC1 - YS1	-2.88242	0.00394633	0.010505
CC1.18 - YS1	-3.08623	0.00202714	0.00589429
CC2 - YS1	-3.14446	0.00166395	0.00511359
CC2.18 - YS1	-2.59127	0.00956234	0.022591
CJ1 - YS1	-2.09631	0.0360551	0.0691819
CJ1.18 - YS1	-2.18365	0.0289879	0.0573687
CJ2 - YS1	1.48488	0.137575	0.205547
CJ2.18 - YS1	1.33931	0.180471	0.259384
DG1 - YS1	-1.57223	0.115897	0.182538
DG1.18 - YS1	-1.36842	0.17118	0.247916
DG2 - YS1	0.262038	0.793292	0.835277
DG2.18 - YS1	1.04815	0.294568	0.393452
IS1 - YS1	3.31915	0.000902918	0.00294227
IS1.18 - YS1	3.05711	0.00223481	0.00635156
IS2 - YS1	2.79507	0.00518879	0.0132524
IS2.18 - YS1	3.14446	0.00166395	0.00515551
JJ1 - YS1	2.09631	0.0360551	0.0695349
JJ2 - YS1	1.04815	0.294568	0.394847
MY1 - YS1	1.74692	0.080651	0.134894
MY2 - YS1	-0.698768	0.484697	0.572548
NJ1 - YS1	3.75588	0.000172733	0.000702076
NJ2 - YS1	2.53304	0.0113079	0.0260634
UF1 - YS1	-1.04815	0.294568	0.396252
UF1.18 - YS1	0.232923	0.815821	0.840274
UF2 - YS1	-1.31019	0.190131	0.271206
UF2.18 - YS1	-0.553192	0.580132	0.656557
CC1 - YS2	-3.66853	0.000243945	0.000960533
CC1.18 - YS2	-3.87234	0.000107795	0.000468349
CC2 - YS2	-3.93057	8.47438e-05	0.000395471
CC2.18 - YS2	-3.37738	0.000731796	0.00246981
CJ1 - YS2	-2.88242	0.00394633	0.0105795
CJ1.18 - YS2	-2.96977	0.00298027	0.00816334
CJ2 - YS2	0.698768	0.484697	0.574343
CJ2.18 - YS2	0.553192	0.580132	0.658528
DG1 - YS2	-2.35834	0.0183567	0.0389822
DG1.18 - YS2	-2.15454	0.0311982	0.0607882
DG2 - YS2	-0.524076	0.600225	0.675254
DG2.18 - YS2	0.262038	0.793292	0.83761
IS1 - YS2	2.53304	0.0113079	0.0262233
IS1.18 - YS2	2.271	0.0231471	0.0470409
IS2 - YS2	2.00896	0.0445414	0.0813366
IS2.18 - YS2	2.35834	0.0183567	0.0392024
JJ1 - YS2	1.31019	0.190131	0.272233
JJ2 - YS2	0.262038	0.793292	0.839956
MY1 - YS2	0.960807	0.336649	0.432835
MY2 - YS2	-1.48488	0.137575	0.206362
NJ1 - YS2	2.96977	0.00298027	0.00822293
NJ2 - YS2	1.74692	0.080651	0.135494
UF1 - YS2	-1.83427	0.0666143	0.117117
UF1.18 - YS2	-0.553192	0.580132	0.660512
UF2 - YS2	-2.09631	0.0360551	0.0698914
UF2.18 - YS2	-1.33931	0.180471	0.260374
YS1 - YS2	-0.786115	0.4318	0.529937

## Sheet: K
Comparison	Z	P.unadj	P.adj
CC1 - CC1.18	0.174692	0.861322	0.882329
CC1 - CC2	3.58119	0.000342035	0.00126754
CC1.18 - CC2	3.4065	0.000658024	0.00236889
CC1 - CC2.18	3.93057	8.47438e-05	0.000385942
CC1.18 - CC2.18	3.75588	0.000172733	0.000702076
CC2 - CC2.18	0.349384	0.726801	0.780485
CC1 - CJ1	4.45465	8.40306e-06	5.67206e-05
CC1.18 - CJ1	4.27996	1.8693e-05	0.000112158
CC2 - CJ1	0.873461	0.382412	0.47394
CC2.18 - CJ1	0.524076	0.600225	0.67325
CC1 - CJ1.18	4.71669	2.39716e-06	2.05938e-05
CC1.18 - CJ1.18	4.542	5.57244e-06	4.05073e-05
CC2 - CJ1.18	1.1355	0.256166	0.343372
CC2.18 - CJ1.18	0.786115	0.4318	0.524825
CJ1 - CJ1.18	0.262038	0.793292	0.823803
CC1 - CJ2	2.62038	0.00878314	0.0206213
CC1.18 - CJ2	2.44569	0.0144575	0.031773
CC2 - CJ2	-0.960807	0.336649	0.425597
CC2.18 - CJ2	-1.31019	0.190131	0.267173
CJ1 - CJ2	-1.83427	0.0666143	0.115506
CJ1.18 - CJ2	-2.09631	0.0360551	0.0681442
CC1 - CJ2.18	3.49384	0.000476122	0.00173052
CC1.18 - CJ2.18	3.31915	0.000902918	0.0030748
CC2 - CJ2.18	-0.0873461	0.930396	0.93784
CC2.18 - CJ2.18	-0.43673	0.662307	0.727768
CJ1 - CJ2.18	-0.960807	0.336649	0.427025
CJ1.18 - CJ2.18	-1.22284	0.221388	0.301024
CJ2 - CJ2.18	0.873461	0.382412	0.475499
CC1 - DG1	0.349384	0.726801	0.782709
CC1.18 - DG1	0.174692	0.861322	0.884727
CC2 - DG1	-3.2318	0.00123011	0.00397421
CC2.18 - DG1	-3.58119	0.000342035	0.00128009
CJ1 - DG1	-4.10526	4.03852e-05	0.000203541
CJ1.18 - DG1	-4.3673	1.2579e-05	8.0591e-05
CJ2 - DG1	-2.271	0.0231471	0.0467894
CJ2.18 - DG1	-3.14446	0.00166395	0.00511359
CC1 - DG1.18	2.09631	0.0360551	0.0684866
CC1.18 - DG1.18	1.92161	0.0546544	0.0974499
CC2 - DG1.18	-1.48488	0.137575	0.208849
CC2.18 - DG1.18	-1.83427	0.0666143	0.116038
CJ1 - DG1.18	-2.35834	0.0183567	0.0385491
CJ1.18 - DG1.18	-2.62038	0.00878314	0.0207502
CJ2 - DG1.18	-0.524076	0.600225	0.675254
CJ2.18 - DG1.18	-1.39754	0.162252	0.237718
DG1 - DG1.18	1.74692	0.080651	0.1343
CC1 - DG2	-1.74692	0.080651	0.134894
CC1.18 - DG2	-1.92161	0.0546544	0.0979117
CC2 - DG2	-5.32811	9.92403e-08	1.50051e-06
CC2.18 - DG2	-5.67749	1.36682e-08	3.03918e-07
CJ1 - DG2	-6.20157	5.59026e-10	2.34791e-08
CJ1.18 - DG2	-6.46361	1.02235e-10	6.44082e-09
CJ2 - DG2	-4.3673	1.2579e-05	8.19805e-05
CJ2.18 - DG2	-5.24076	1.59914e-07	2.08439e-06
DG1 - DG2	-2.09631	0.0360551	0.0688325
DG1.18 - DG2	-3.84323	0.000121427	0.000509995
CC1 - DG2.18	-0.524076	0.600225	0.677269
CC1.18 - DG2.18	-0.698768	0.484697	0.576149
CC2 - DG2.18	-4.10526	4.03852e-05	0.000206292
CC2.18 - DG2.18	-4.45465	8.40306e-06	5.77519e-05
CJ1 - DG2.18	-4.97873	6.40044e-07	6.72046e-06
CJ1.18 - DG2.18	-5.24076	1.59914e-07	2.15883e-06
CJ2 - DG2.18	-3.14446	0.00166395	0.00515551
CJ2.18 - DG2.18	-4.01792	5.87144e-05	0.000284539
DG1 - DG2.18	-0.873461	0.382412	0.477069
DG1.18 - DG2.18	-2.62038	0.00878314	0.0208807
DG2 - DG2.18	1.22284	0.221388	0.302111
CC1 - IS1	1.57223	0.115897	0.18103
CC1.18 - IS1	1.39754	0.162252	0.238643
CC2 - IS1	-2.00896	0.0445414	0.0817314
CC2.18 - IS1	-2.35834	0.0183567	0.0387644
CJ1 - IS1	-2.88242	0.00394633	0.0108884
CJ1.18 - IS1	-3.14446	0.00166395	0.00519812
CJ2 - IS1	-1.04815	0.294568	0.381325
CJ2.18 - IS1	-1.92161	0.0546544	0.098378
DG1 - IS1	1.22284	0.221388	0.303206
DG1.18 - IS1	-0.524076	0.600225	0.679297
DG2 - IS1	3.31915	0.000902918	0.00310276
DG2.18 - IS1	2.09631	0.0360551	0.0691819
CC1 - IS1.18	2.18365	0.0289879	0.0576706
CC1.18 - IS1.18	2.00896	0.0445414	0.0821301
CC2 - IS1.18	-1.39754	0.162252	0.239575
CC2.18 - IS1.18	-1.74692	0.080651	0.135494
CJ1 - IS1.18	-2.271	0.0231471	0.0470409
CJ1.18 - IS1.18	-2.53304	0.0113079	0.0255952
CJ2 - IS1.18	-0.43673	0.662307	0.729889
CJ2.18 - IS1.18	-1.31019	0.190131	0.26817
DG1 - IS1.18	1.83427	0.0666143	0.116575
DG1.18 - IS1.18	0.0873461	0.930396	0.940347
DG2 - IS1.18	3.93057	8.47438e-05	0.000390648
DG2.18 - IS1.18	2.70773	0.00677456	0.0171865
IS1 - IS1.18	0.611422	0.54092	0.625284
CC1 - IS2	0.873461	0.382412	0.478648
CC1.18 - IS2	0.698768	0.484697	0.577966
CC2 - IS2	-2.70773	0.00677456	0.0173026
CC2.18 - IS2	-3.05711	0.00223481	0.00675806
CJ1 - IS2	-3.58119	0.000342035	0.00129289
CJ1.18 - IS2	-3.84323	0.000121427	0.000515725
CJ2 - IS2	-1.74692	0.080651	0.136099
CJ2.18 - IS2	-2.62038	0.00878314	0.0210128
DG1 - IS2	0.524076	0.600225	0.681337
DG1.18 - IS2	-1.22284	0.221388	0.304308
DG2 - IS2	2.62038	0.00878314	0.0211467
DG2.18 - IS2	1.39754	0.162252	0.240515
IS1 - IS2	-0.698768	0.484697	0.579795
IS1.18 - IS2	-1.31019	0.190131	0.269175
CC1 - IS2.18	-0.669653	0.503079	0.596125
CC1.18 - IS2.18	-0.844345	0.398477	0.492236
CC2 - IS2.18	-4.25084	2.12969e-05	0.000125785
CC2.18 - IS2.18	-4.60023	4.22033e-06	3.25569e-05
CJ1 - IS2.18	-5.1243	2.98642e-07	3.52771e-06
CJ1.18 - IS2.18	-5.38634	7.19068e-08	1.18177e-06
CJ2 - IS2.18	-3.29003	0.00100175	0.00338091
CJ2.18 - IS2.18	-4.1635	3.13412e-05	0.000164541
DG1 - IS2.18	-1.01904	0.308185	0.397591
DG1.18 - IS2.18	-2.76596	0.00567558	0.0148984
DG2 - IS2.18	1.07727	0.281361	0.37581
DG2.18 - IS2.18	-0.145577	0.884256	0.903375
IS1 - IS2.18	-2.24188	0.024969	0.049938
IS1.18 - IS2.18	-2.8533	0.00432671	0.0117662
IS2 - IS2.18	-1.54311	0.122803	0.191027
CC1 - JJ1	-2.09631	0.0360551	0.0695349
CC1.18 - JJ1	-2.271	0.0231471	0.0472952
CC2 - JJ1	-5.67749	1.36682e-08	3.22912e-07
CC2.18 - JJ1	-6.02688	1.67157e-09	6.31854e-08
CJ1 - JJ1	-6.55095	5.71705e-11	4.32209e-09
CJ1.18 - JJ1	-6.81299	9.55891e-12	1.20442e-09
CJ2 - JJ1	-4.71669	2.39716e-06	2.10727e-05
CJ2.18 - JJ1	-5.59015	2.26876e-08	4.51365e-07
DG1 - JJ1	-2.44569	0.0144575	0.0319588
DG1.18 - JJ1	-4.19261	2.75762e-05	0.000148912
DG2 - JJ1	-0.349384	0.726801	0.784945
DG2.18 - JJ1	-1.57223	0.115897	0.181781
IS1 - JJ1	-3.66853	0.000243945	0.000960533
IS1.18 - JJ1	-4.27996	1.8693e-05	0.000113967
IS2 - JJ1	-2.96977	0.00298027	0.0086657
IS2.18 - JJ1	-1.42665	0.15368	0.231439
CC1 - JJ2	-0.43673	0.662307	0.732023
CC1.18 - JJ2	-0.611422	0.54092	0.627202
CC2 - JJ2	-4.01792	5.87144e-05	0.000288235
CC2.18 - JJ2	-4.3673	1.2579e-05	8.34188e-05
CJ1 - JJ2	-4.89138	1.00132e-06	9.70508e-06
CJ1.18 - JJ2	-5.15342	2.55782e-07	3.11889e-06
CJ2 - JJ2	-3.05711	0.00223481	0.00681256
CJ2.18 - JJ2	-3.93057	8.47438e-05	0.000395471
DG1 - JJ2	-0.786115	0.4318	0.526518
DG1.18 - JJ2	-2.53304	0.0113079	0.0257494
DG2 - JJ2	1.31019	0.190131	0.270187
DG2.18 - JJ2	0.0873461	0.930396	0.942868
IS1 - JJ2	-2.00896	0.0445414	0.0825327
IS1.18 - JJ2	-2.62038	0.00878314	0.0212822
IS2 - JJ2	-1.31019	0.190131	0.271206
IS2.18 - JJ2	0.232923	0.815821	0.84257
JJ1 - JJ2	1.65958	0.097	0.156692
CC1 - MY1	3.14446	0.00166395	0.00524143
CC1.18 - MY1	2.96977	0.00298027	0.00873287
CC2 - MY1	-0.43673	0.662307	0.73417
CC2.18 - MY1	-0.786115	0.4318	0.528222
CJ1 - MY1	-1.31019	0.190131	0.272233
CJ1.18 - MY1	-1.57223	0.115897	0.182538
CJ2 - MY1	0.524076	0.600225	0.683389
CJ2.18 - MY1	-0.349384	0.726801	0.787194
DG1 - MY1	2.79507	0.00518879	0.0138124
DG1.18 - MY1	1.04815	0.294568	0.382635
DG2 - MY1	4.89138	1.00132e-06	9.96048e-06
DG2.18 - MY1	3.66853	0.000243945	0.000970644
IS1 - MY1	1.57223	0.115897	0.183302
IS1.18 - MY1	0.960807	0.336649	0.428463
IS2 - MY1	2.271	0.0231471	0.0475523
IS2.18 - MY1	3.81411	0.000136674	0.000567722
JJ1 - MY1	5.24076	1.59914e-07	2.23879e-06
JJ2 - MY1	3.58119	0.000342035	0.00130595
CC1 - MY2	4.19261	2.75762e-05	0.00015107
CC1.18 - MY2	4.01792	5.87144e-05	0.000292027
CC2 - MY2	0.611422	0.54092	0.629132
CC2.18 - MY2	0.262038	0.793292	0.826073
CJ1 - MY2	-0.262038	0.793292	0.828355
CJ1.18 - MY2	-0.524076	0.600225	0.685454
CJ2 - MY2	1.57223	0.115897	0.184072
CJ2.18 - MY2	0.698768	0.484697	0.581636
DG1 - MY2	3.84323	0.000121427	0.000521585
DG1.18 - MY2	2.09631	0.0360551	0.0698914
DG2 - MY2	5.93953	2.85837e-09	9.00386e-08
DG2.18 - MY2	4.71669	2.39716e-06	2.15744e-05
IS1 - MY2	2.62038	0.00878314	0.0214195
IS1.18 - MY2	2.00896	0.0445414	0.0829392
IS2 - MY2	3.31915	0.000902918	0.00313122
IS2.18 - MY2	4.86226	1.16051e-06	1.09668e-05
JJ1 - MY2	6.28892	3.1969e-10	1.51054e-08
JJ2 - MY2	4.62934	3.66831e-06	2.88879e-05
MY1 - MY2	1.04815	0.294568	0.383954
CC1 - NJ1	-0.698768	0.484697	0.583488
CC1.18 - NJ1	-0.873461	0.382412	0.480238
CC2 - NJ1	-4.27996	1.8693e-05	0.000115835
CC2.18 - NJ1	-4.62934	3.66831e-06	2.95026e-05
CJ1 - NJ1	-5.15342	2.55782e-07	3.22285e-06
CJ1.18 - NJ1	-5.41546	6.11328e-08	1.05037e-06
CJ2 - NJ1	-3.31915	0.000902918	0.00316021
CJ2.18 - NJ1	-4.19261	2.75762e-05	0.000153291
DG1 - NJ1	-1.04815	0.294568	0.385283
DG1.18 - NJ1	-2.79507	0.00518879	0.0139104
DG2 - NJ1	1.04815	0.294568	0.386621
DG2.18 - NJ1	-0.174692	0.861322	0.887138
IS1 - NJ1	-2.271	0.0231471	0.0478121
IS1.18 - NJ1	-2.88242	0.00394633	0.0109685
IS2 - NJ1	-1.57223	0.115897	0.184849
IS2.18 - NJ1	-0.0291154	0.976773	0.979363
JJ1 - NJ1	1.39754	0.162252	0.241462
JJ2 - NJ1	-0.262038	0.793292	0.830649
MY1 - NJ1	-3.84323	0.000121427	0.000527581
MY2 - NJ1	-4.89138	1.00132e-06	1.02297e-05
CC1 - NJ2	1.83427	0.0666143	0.117117
CC1.18 - NJ2	1.65958	0.097	0.157365
CC2 - NJ2	-1.74692	0.080651	0.136709
CC2.18 - NJ2	-2.09631	0.0360551	0.0702517
CJ1 - NJ2	-2.62038	0.00878314	0.0215586
CJ1.18 - NJ2	-2.88242	0.00394633	0.0110497
CJ2 - NJ2	-0.786115	0.4318	0.529937
CJ2.18 - NJ2	-1.65958	0.097	0.158043
DG1 - NJ2	1.48488	0.137575	0.209691
DG1.18 - NJ2	-0.262038	0.793292	0.832957
DG2 - NJ2	3.58119	0.000342035	0.00131928
DG2.18 - NJ2	2.35834	0.0183567	0.0389822
IS1 - NJ2	0.262038	0.793292	0.835277
IS1.18 - NJ2	-0.349384	0.726801	0.789456
IS2 - NJ2	0.960807	0.336649	0.42991
IS2.18 - NJ2	2.50392	0.0122826	0.0274723
JJ1 - NJ2	3.93057	8.47438e-05	0.000400414
JJ2 - NJ2	2.271	0.0231471	0.0480748
MY1 - NJ2	-1.31019	0.190131	0.273269
MY2 - NJ2	-2.35834	0.0183567	0.0392024
NJ1 - NJ2	2.53304	0.0113079	0.0259055
CC1 - UF1	0.611422	0.54092	0.631073
CC1.18 - UF1	0.43673	0.662307	0.73633
CC2 - UF1	-2.96977	0.00298027	0.0088011
CC2.18 - UF1	-3.31915	0.000902918	0.00318975
CJ1 - UF1	-3.84323	0.000121427	0.000533715
CJ1.18 - UF1	-4.10526	4.03852e-05	0.000209118
CJ2 - UF1	-2.00896	0.0445414	0.0833498
CJ2.18 - UF1	-2.88242	0.00394633	0.0111322
DG1 - UF1	0.262038	0.793292	0.83761
DG1.18 - UF1	-1.48488	0.137575	0.21054
DG2 - UF1	2.35834	0.0183567	0.0394252
DG2.18 - UF1	1.1355	0.256166	0.344594
IS1 - UF1	-0.960807	0.336649	0.431368
IS1.18 - UF1	-1.57223	0.115897	0.185632
IS2 - UF1	-0.262038	0.793292	0.839956
IS2.18 - UF1	1.28108	0.200167	0.280234
JJ1 - UF1	2.70773	0.00677456	0.0174203
JJ2 - UF1	1.04815	0.294568	0.387968
MY1 - UF1	-2.53304	0.0113079	0.0260634
MY2 - UF1	-3.58119	0.000342035	0.00133288
NJ1 - UF1	1.31019	0.190131	0.274312
NJ2 - UF1	-1.22284	0.221388	0.305419
CC1 - UF1.18	-1.1355	0.256166	0.345825
CC1.18 - UF1.18	-1.31019	0.190131	0.275363
CC2 - UF1.18	-4.71669	2.39716e-06	2.21006e-05
CC2.18 - UF1.18	-5.06607	4.0611e-07	4.6518e-06
CJ1 - UF1.18	-5.59015	2.26876e-08	4.76441e-07
CJ1.18 - UF1.18	-5.85219	4.85154e-09	1.30992e-07
CJ2 - UF1.18	-3.75588	0.000172733	0.000709708
CJ2.18 - UF1.18	-4.62934	3.66831e-06	3.01439e-05
DG1 - UF1.18	-1.48488	0.137575	0.211395
DG1.18 - UF1.18	-3.2318	0.00123011	0.00400847
DG2 - UF1.18	0.611422	0.54092	0.633027
DG2.18 - UF1.18	-0.611422	0.54092	0.634993
IS1 - UF1.18	-2.70773	0.00677456	0.0175396
IS1.18 - UF1.18	-3.31915	0.000902918	0.00321984
IS2 - UF1.18	-2.00896	0.0445414	0.0837645
IS2.18 - UF1.18	-0.465846	0.641326	0.717223
JJ1 - UF1.18	0.960807	0.336649	0.432835
JJ2 - UF1.18	-0.698768	0.484697	0.585353
MY1 - UF1.18	-4.27996	1.8693e-05	0.000117766
MY2 - UF1.18	-5.32811	9.92403e-08	1.56303e-06
NJ1 - UF1.18	-0.43673	0.662307	0.738502
NJ2 - UF1.18	-2.96977	0.00298027	0.0088704
UF1 - UF1.18	-1.74692	0.080651	0.137325
CC1 - UF2	2.09631	0.0360551	0.0706157
CC1.18 - UF2	1.92161	0.0546544	0.0988487
CC2 - UF2	-1.48488	0.137575	0.212258
CC2.18 - UF2	-1.83427	0.0666143	0.117665
CJ1 - UF2	-2.35834	0.0183567	0.0396505
CJ1.18 - UF2	-2.62038	0.00878314	0.0216995
CJ2 - UF2	-0.524076	0.600225	0.687531
CJ2.18 - UF2	-1.39754	0.162252	0.242416
DG1 - UF2	1.74692	0.080651	0.137946
DG1.18 - UF2	0	1	1
DG2 - UF2	3.84323	0.000121427	0.000539994
DG2.18 - UF2	2.62038	0.00878314	0.0218423
IS1 - UF2	0.524076	0.600225	0.689621
IS1.18 - UF2	-0.0873461	0.930396	0.945403
IS2 - UF2	1.22284	0.221388	0.306538
IS2.18 - UF2	2.76596	0.00567558	0.0150026
JJ1 - UF2	4.19261	2.75762e-05	0.000155579
JJ2 - UF2	2.53304	0.0113079	0.0262233
MY1 - UF2	-1.04815	0.294568	0.389324
MY2 - UF2	-2.09631	0.0360551	0.0709835
NJ1 - UF2	2.79507	0.00518879	0.0140097
NJ2 - UF2	0.262038	0.793292	0.842316
UF1 - UF2	1.48488	0.137575	0.213128
UF1.18 - UF2	3.2318	0.00123011	0.00404333
CC1 - UF2.18	1.80515	0.0710509	0.122636
CC1.18 - UF2.18	1.63046	0.103004	0.165684
CC2 - UF2.18	-1.77604	0.0757269	0.130113
CC2.18 - UF2.18	-2.12542	0.0335515	0.0664004
CJ1 - UF2.18	-2.6495	0.00806117	0.0203141
CJ1.18 - UF2.18	-2.91154	0.00359657	0.0102993
CJ2 - UF2.18	-0.81523	0.414941	0.510904
CJ2.18 - UF2.18	-1.68869	0.0912788	0.15067
DG1 - UF2.18	1.45577	0.145457	0.219931
DG1.18 - UF2.18	-0.291154	0.770934	0.823201
DG2 - UF2.18	3.55207	0.000382209	0.00140267
DG2.18 - UF2.18	2.32923	0.019847	0.0414484
IS1 - UF2.18	0.232923	0.815821	0.844878
IS1.18 - UF2.18	-0.3785	0.70506	0.770267
IS2 - UF2.18	0.931691	0.351496	0.442885
IS2.18 - UF2.18	2.4748	0.0133309	0.0296416
JJ1 - UF2.18	3.90146	9.56153e-05	0.000430269
JJ2 - UF2.18	2.24188	0.024969	0.0502036
MY1 - UF2.18	-1.33931	0.180471	0.26339
MY2 - UF2.18	-2.38746	0.0169653	0.0370687
NJ1 - UF2.18	2.50392	0.0122826	0.0276358
NJ2 - UF2.18	-0.0291154	0.976773	0.981968
UF1 - UF2.18	1.19373	0.232584	0.315114
UF1.18 - UF2.18	2.94065	0.00327524	0.00945068
UF2 - UF2.18	-0.291154	0.770934	0.825533
CC1 - YS1	-1.04815	0.294568	0.390691
CC1.18 - YS1	-1.22284	0.221388	0.307665
CC2 - YS1	-4.62934	3.66831e-06	3.08138e-05
CC2.18 - YS1	-4.97873	6.40044e-07	6.91247e-06
CJ1 - YS1	-5.5028	3.73803e-08	6.72845e-07
CJ1.18 - YS1	-5.76484	8.17354e-09	2.05973e-07
CJ2 - YS1	-3.66853	0.000243945	0.00098097
CJ2.18 - YS1	-4.542	5.57244e-06	4.13016e-05
DG1 - YS1	-1.39754	0.162252	0.243378
DG1.18 - YS1	-3.14446	0.00166395	0.00528548
DG2 - YS1	0.698768	0.484697	0.587229
DG2.18 - YS1	-0.524076	0.600225	0.691723
IS1 - YS1	-2.62038	0.00878314	0.0219869
IS1.18 - YS1	-3.2318	0.00123011	0.0040788
IS2 - YS1	-1.92161	0.0546544	0.0993239
IS2.18 - YS1	-0.3785	0.70506	0.7725
JJ1 - YS1	1.04815	0.294568	0.392066
JJ2 - YS1	-0.611422	0.54092	0.636971
MY1 - YS1	-4.19261	2.75762e-05	0.000157937
MY2 - YS1	-5.24076	1.59914e-07	2.3249e-06
NJ1 - YS1	-0.349384	0.726801	0.791731
NJ2 - YS1	-2.88242	0.00394633	0.0112159
UF1 - YS1	-1.65958	0.097	0.158727
UF1.18 - YS1	0.0873461	0.930396	0.947951
UF2 - YS1	-3.14446	0.00166395	0.00533027
UF2.18 - YS1	-2.8533	0.00432671	0.0118514
CC1 - YS2	-2.35834	0.0183567	0.0398783
CC1.18 - YS2	-2.53304	0.0113079	0.0263852
CC2 - YS2	-5.93953	2.85837e-09	9.8224e-08
CC2.18 - YS2	-6.28892	3.1969e-10	1.72633e-08
CJ1 - YS2	-6.81299	9.55891e-12	1.80663e-09
CJ1.18 - YS2	-7.07503	1.49416e-12	5.64791e-10
CJ2 - YS2	-4.97873	6.40044e-07	7.11578e-06
CJ2.18 - YS2	-5.85219	4.85154e-09	1.41068e-07
DG1 - YS2	-2.70773	0.00677456	0.0176606
DG1.18 - YS2	-4.45465	8.40306e-06	5.88214e-05
DG2 - YS2	-0.611422	0.54092	0.638962
DG2.18 - YS2	-1.83427	0.0666143	0.118217
IS1 - YS2	-3.93057	8.47438e-05	0.000405483
IS1.18 - YS2	-4.542	5.57244e-06	4.21276e-05
IS2 - YS2	-3.2318	0.00123011	0.00411489
IS2.18 - YS2	-1.68869	0.0912788	0.151331
JJ1 - YS2	-0.262038	0.793292	0.844688
JJ2 - YS2	-1.92161	0.0546544	0.0998038
MY1 - YS2	-5.5028	3.73803e-08	7.06487e-07
MY2 - YS2	-6.55095	5.71705e-11	5.40261e-09
NJ1 - YS2	-1.65958	0.097	0.159417
NJ2 - YS2	-4.19261	2.75762e-05	0.000160366
UF1 - YS2	-2.96977	0.00298027	0.0089408
UF1.18 - YS2	-1.22284	0.221388	0.3088
UF2 - YS2	-4.45465	8.40306e-06	5.99312e-05
UF2.18 - YS2	-4.1635	3.13412e-05	0.000166859
YS1 - YS2	-1.31019	0.190131	0.276422

## Sheet: Na
Comparison	Z	P.unadj	P.adj
CC1 - CC1.18	-0.174692	0.861322	0.884727
CC1 - CC2	-0.698768	0.484697	0.574343
CC1.18 - CC2	-0.524076	0.600225	0.667309
CC1 - CC2.18	-0.145577	0.884256	0.898518
CC1.18 - CC2.18	0.0291154	0.976773	0.976773
CC2 - CC2.18	0.553192	0.580132	0.650712
CC1 - CJ1	-4.97873	6.40044e-07	6.72046e-06
CC1.18 - CJ1	-4.80403	1.55501e-06	1.27781e-05
CC2 - CJ1	-4.27996	1.8693e-05	0.000112158
CC2.18 - CJ1	-4.83315	1.3439e-06	1.12888e-05
CC1 - CJ1.18	-2.03807	0.0415425	0.0797109
CC1.18 - CJ1.18	-1.86338	0.0624085	0.110236
CC2 - CJ1.18	-1.33931	0.180471	0.266477
CC2.18 - CJ1.18	-1.8925	0.0584247	0.105164
CJ1 - CJ1.18	2.94065	0.00327524	0.00910323
CC1 - CJ2	-6.6383	3.17321e-11	2.99868e-09
CC1.18 - CJ2	-6.46361	1.02235e-10	6.44082e-09
CC2 - CJ2	-5.93953	2.85837e-09	9.00386e-08
CC2.18 - CJ2	-6.49272	8.42982e-11	6.37295e-09
CJ1 - CJ2	-1.65958	0.097	0.159417
CJ1.18 - CJ2	-4.60023	4.22033e-06	3.12801e-05
CC1 - CJ2.18	-5.1243	2.98642e-07	3.42081e-06
CC1.18 - CJ2.18	-4.94961	7.43623e-07	7.59702e-06
CC2 - CJ2.18	-4.42553	9.62042e-06	6.37986e-05
CC2.18 - CJ2.18	-4.97873	6.40044e-07	6.91247e-06
CJ1 - CJ2.18	-0.145577	0.884256	0.90094
CJ1.18 - CJ2.18	-3.08623	0.00202714	0.00593998
CJ2 - CJ2.18	1.514	0.130026	0.199796
CC1 - DG1	-1.74692	0.080651	0.135494
CC1.18 - DG1	-1.57223	0.115897	0.18103
CC2 - DG1	-1.04815	0.294568	0.382635
CC2.18 - DG1	-1.60134	0.109301	0.175811
CJ1 - DG1	3.2318	0.00123011	0.00384283
CJ1.18 - DG1	0.291154	0.770934	0.816283
CJ2 - DG1	4.89138	1.00132e-06	9.01186e-06
CJ2.18 - DG1	3.37738	0.000731796	0.00253779
CC1 - DG1.18	-1.39754	0.162252	0.242416
CC1.18 - DG1.18	-1.22284	0.221388	0.303206
CC2 - DG1.18	-0.698768	0.484697	0.576149
CC2.18 - DG1.18	-1.25196	0.210584	0.290514
CJ1 - DG1.18	3.58119	0.000342035	0.00128009
CJ1.18 - DG1.18	0.640538	0.521823	0.60692
CJ2 - DG1.18	5.24076	1.59914e-07	2.3249e-06
CJ2.18 - DG1.18	3.72677	0.000193953	0.000788325
DG1 - DG1.18	0.349384	0.726801	0.782709
CC1 - DG2	-2.271	0.0231471	0.0478121
CC1.18 - DG2	-2.09631	0.0360551	0.0702517
CC2 - DG2	-1.57223	0.115897	0.181781
CC2.18 - DG2	-2.12542	0.0335515	0.0660546
CJ1 - DG2	2.70773	0.00677456	0.0167371
CJ1.18 - DG2	-0.232923	0.815821	0.844878
CJ2 - DG2	4.3673	1.2579e-05	7.92478e-05
CJ2.18 - DG2	2.8533	0.00432671	0.0113576
DG1 - DG2	-0.524076	0.600225	0.669278
DG1.18 - DG2	-0.873461	0.382412	0.469324
CC1 - DG2.18	-1.45577	0.145457	0.219931
CC1.18 - DG2.18	-1.28108	0.200167	0.280234
CC2 - DG2.18	-0.756999	0.44905	0.544042
CC2.18 - DG2.18	-1.31019	0.190131	0.270187
CJ1 - DG2.18	3.52296	0.000426759	0.00155111
CJ1.18 - DG2.18	0.582307	0.56036	0.636084
CJ2 - DG2.18	5.18253	2.18893e-07	2.95505e-06
CJ2.18 - DG2.18	3.66853	0.000243945	0.000970644
DG1 - DG2.18	0.291154	0.770934	0.818576
DG1.18 - DG2.18	-0.0582307	0.953565	0.961193
DG2 - DG2.18	0.81523	0.414941	0.507597
CC1 - IS1	-5.59015	2.26876e-08	5.04467e-07
CC1.18 - IS1	-5.41546	6.11328e-08	1.05037e-06
CC2 - IS1	-4.89138	1.00132e-06	9.23166e-06
CC2.18 - IS1	-5.44457	5.19304e-08	9.34747e-07
CJ1 - IS1	-0.611422	0.54092	0.617727
CJ1.18 - IS1	-3.55207	0.000382209	0.00141642
CJ2 - IS1	1.04815	0.294568	0.383954
CJ2.18 - IS1	-0.465846	0.641326	0.710913
DG1 - IS1	-3.84323	0.000121427	0.000527581
DG1.18 - IS1	-4.19261	2.75762e-05	0.000155579
DG2 - IS1	-3.31915	0.000902918	0.00294227
DG2.18 - IS1	-4.13438	3.55914e-05	0.000194979
CC1 - IS1.18	-5.26988	1.36514e-07	2.06409e-06
CC1.18 - IS1.18	-5.09519	3.48398e-07	3.87336e-06
CC2 - IS1.18	-4.57111	4.85147e-06	3.4601e-05
CC2.18 - IS1.18	-5.1243	2.98642e-07	3.52771e-06
CJ1 - IS1.18	-0.291154	0.770934	0.820882
CJ1.18 - IS1.18	-3.2318	0.00123011	0.00387486
CJ2 - IS1.18	1.36842	0.17118	0.254748
CJ2.18 - IS1.18	-0.145577	0.884256	0.903375
DG1 - IS1.18	-3.52296	0.000426759	0.00156617
DG1.18 - IS1.18	-3.87234	0.000107795	0.000496907
DG2 - IS1.18	-2.99888	0.00270973	0.00770133
DG2.18 - IS1.18	-3.81411	0.000136674	0.00058048
IS1 - IS1.18	0.320269	0.748765	0.801793
CC1 - IS2	-5.32811	9.92403e-08	1.56303e-06
CC1.18 - IS2	-5.15342	2.55782e-07	3.11889e-06
CC2 - IS2	-4.62934	3.66831e-06	2.77324e-05
CC2.18 - IS2	-5.18253	2.18893e-07	3.0645e-06
CJ1 - IS2	-0.349384	0.726801	0.784945
CJ1.18 - IS2	-3.29003	0.00100175	0.00320899
CJ2 - IS2	1.31019	0.190131	0.271206
CJ2.18 - IS2	-0.203807	0.838504	0.863636
DG1 - IS2	-3.58119	0.000342035	0.00129289
DG1.18 - IS2	-3.93057	8.47438e-05	0.000410681
DG2 - IS2	-3.05711	0.00223481	0.00644853
DG2.18 - IS2	-3.87234	0.000107795	0.000503041
IS1 - IS2	0.262038	0.793292	0.823803
IS1.18 - IS2	-0.0582307	0.953565	0.963763
CC1 - IS2.18	-3.87234	0.000107795	0.000509329
CC1.18 - IS2.18	-3.69765	0.000217605	0.000875049
CC2 - IS2.18	-3.17357	0.00150575	0.00462742
CC2.18 - IS2.18	-3.72677	0.000193953	0.000796894
CJ1 - IS2.18	1.10638	0.268561	0.356196
CJ1.18 - IS2.18	-1.83427	0.0666143	0.115506
CJ2 - IS2.18	2.76596	0.00567558	0.0145943
CJ2.18 - IS2.18	1.25196	0.210584	0.291578
DG1 - IS2.18	-2.12542	0.0335515	0.0664004
DG1.18 - IS2.18	-2.4748	0.0133309	0.0299945
DG2 - IS2.18	-1.60134	0.109301	0.176563
DG2.18 - IS2.18	-2.41657	0.0156673	0.0340359
IS1 - IS2.18	1.71781	0.085832	0.142927
IS1.18 - IS2.18	1.39754	0.162252	0.243378
IS2 - IS2.18	1.45577	0.145457	0.220814
CC1 - JJ1	-6.90034	5.18787e-12	1.96102e-09
CC1.18 - JJ1	-6.72565	1.74815e-11	2.20266e-09
CC2 - JJ1	-6.20157	5.59026e-10	2.6414e-08
CC2.18 - JJ1	-6.75476	1.4307e-11	2.70402e-09
CJ1 - JJ1	-1.92161	0.0546544	0.0988487
CJ1.18 - JJ1	-4.86226	1.16051e-06	1.02017e-05
CJ2 - JJ1	-0.262038	0.793292	0.826073
CJ2.18 - JJ1	-1.77604	0.0757269	0.129524
DG1 - JJ1	-5.15342	2.55782e-07	3.22285e-06
DG1.18 - JJ1	-5.5028	3.73803e-08	7.43671e-07
DG2 - JJ1	-4.62934	3.66831e-06	2.82984e-05
DG2.18 - JJ1	-5.44457	5.19304e-08	9.81484e-07
IS1 - JJ1	-1.31019	0.190131	0.272233
IS1.18 - JJ1	-1.63046	0.103004	0.167826
IS2 - JJ1	-1.57223	0.115897	0.182538
IS2.18 - JJ1	-3.028	0.00246181	0.00704972
CC1 - JJ2	-6.02688	1.67157e-09	5.74412e-08
CC1.18 - JJ2	-5.85219	4.85154e-09	1.30992e-07
CC2 - JJ2	-5.32811	9.92403e-08	1.63099e-06
CC2.18 - JJ2	-5.8813	4.07053e-09	1.18359e-07
CJ1 - JJ2	-1.04815	0.294568	0.385283
CJ1.18 - JJ2	-3.9888	6.64074e-05	0.00033029
CJ2 - JJ2	0.611422	0.54092	0.619599
CJ2.18 - JJ2	-0.902576	0.366751	0.457531
DG1 - JJ2	-4.27996	1.8693e-05	0.000113967
DG1.18 - JJ2	-4.62934	3.66831e-06	2.88879e-05
DG2 - JJ2	-3.75588	0.000172733	0.000725479
DG2.18 - JJ2	-4.57111	4.85147e-06	3.52664e-05
IS1 - JJ2	-0.43673	0.662307	0.723561
IS1.18 - JJ2	-0.756999	0.44905	0.545791
IS2 - JJ2	-0.698768	0.484697	0.577966
IS2.18 - JJ2	-2.15454	0.0311982	0.0623963
JJ1 - JJ2	0.873461	0.382412	0.470853
CC1 - MY1	-2.70773	0.00677456	0.0168473
CC1.18 - MY1	-2.53304	0.0113079	0.0257494
CC2 - MY1	-2.00896	0.0445414	0.0829392
CC2.18 - MY1	-2.56215	0.0104026	0.0241238
CJ1 - MY1	2.271	0.0231471	0.0480748
CJ1.18 - MY1	-0.669653	0.503079	0.588743
CJ2 - MY1	3.93057	8.47438e-05	0.000416015
CJ2.18 - MY1	2.41657	0.0156673	0.0342327
DG1 - MY1	-0.960807	0.336649	0.424178
DG1.18 - MY1	-1.31019	0.190131	0.273269
DG2 - MY1	-0.43673	0.662307	0.725658
DG2.18 - MY1	-1.25196	0.210584	0.29265
IS1 - MY1	2.88242	0.00394633	0.010505
IS1.18 - MY1	2.56215	0.0104026	0.0242727
IS2 - MY1	2.62038	0.00878314	0.0208807
IS2.18 - MY1	1.16461	0.244175	0.330818
JJ1 - MY1	4.19261	2.75762e-05	0.000157937
JJ2 - MY1	3.31915	0.000902918	0.00296785
CC1 - MY2	-2.00896	0.0445414	0.0833498
CC1.18 - MY2	-1.83427	0.0666143	0.116038
CC2 - MY2	-1.31019	0.190131	0.274312
CC2.18 - MY2	-1.86338	0.0624085	0.110753
CJ1 - MY2	2.96977	0.00298027	0.00834475
CJ1.18 - MY2	0.0291154	0.976773	0.979363
CJ2 - MY2	4.62934	3.66831e-06	2.95026e-05
CJ2.18 - MY2	3.11534	0.00183731	0.00546854
DG1 - MY2	-0.262038	0.793292	0.828355
DG1.18 - MY2	-0.611422	0.54092	0.621483
DG2 - MY2	0.262038	0.793292	0.830649
DG2.18 - MY2	-0.553192	0.580132	0.652649
IS1 - MY2	3.58119	0.000342035	0.00130595
IS1.18 - MY2	3.26092	0.00111052	0.00352752
IS2 - MY2	3.31915	0.000902918	0.00299389
IS2.18 - MY2	1.86338	0.0624085	0.111275
JJ1 - MY2	4.89138	1.00132e-06	9.46246e-06
JJ2 - MY2	4.01792	5.87144e-05	0.000308251
MY1 - MY2	0.698768	0.484697	0.579795
CC1 - NJ1	-3.58119	0.000342035	0.00131928
CC1.18 - NJ1	-3.4065	0.000658024	0.00232461
CC2 - NJ1	-2.88242	0.00394633	0.0105795
CC2.18 - NJ1	-3.43561	0.000591218	0.00212838
CJ1 - NJ1	1.39754	0.162252	0.244348
CJ1.18 - NJ1	-1.54311	0.122803	0.190244
CJ2 - NJ1	3.05711	0.00223481	0.00649813
CJ2.18 - NJ1	1.54311	0.122803	0.191027
DG1 - NJ1	-1.83427	0.0666143	0.116575
DG1.18 - NJ1	-2.18365	0.0289879	0.0582841
DG2 - NJ1	-1.31019	0.190131	0.275363
DG2.18 - NJ1	-2.12542	0.0335515	0.0667499
IS1 - NJ1	2.00896	0.0445414	0.0837645
IS1.18 - NJ1	1.68869	0.0912788	0.151331
IS2 - NJ1	1.74692	0.080651	0.136099
IS2.18 - NJ1	0.291154	0.770934	0.823201
JJ1 - NJ1	3.31915	0.000902918	0.00302038
JJ2 - NJ1	2.44569	0.0144575	0.0321468
MY1 - NJ1	-0.873461	0.382412	0.472391
MY2 - NJ1	-1.57223	0.115897	0.183302
CC1 - NJ2	-4.01792	5.87144e-05	0.000312592
CC1.18 - NJ2	-3.84323	0.000121427	0.000533715
CC2 - NJ2	-3.31915	0.000902918	0.00304735
CC2.18 - NJ2	-3.87234	0.000107795	0.000515777
CJ1 - NJ2	0.960807	0.336649	0.425597
CJ1.18 - NJ2	-1.97984	0.0477211	0.087993
CJ2 - NJ2	2.62038	0.00878314	0.0210128
CJ2.18 - NJ2	1.10638	0.268561	0.35745
DG1 - NJ2	-2.271	0.0231471	0.0483404
DG1.18 - NJ2	-2.62038	0.00878314	0.0211467
DG2 - NJ2	-1.74692	0.080651	0.136709
DG2.18 - NJ2	-2.56215	0.0104026	0.0244235
IS1 - NJ2	1.57223	0.115897	0.184072
IS1.18 - NJ2	1.25196	0.210584	0.29373
IS2 - NJ2	1.31019	0.190131	0.276422
IS2.18 - NJ2	-0.145577	0.884256	0.905823
JJ1 - NJ2	2.88242	0.00394633	0.0106551
JJ2 - NJ2	2.00896	0.0445414	0.0841833
MY1 - NJ2	-1.31019	0.190131	0.277489
MY2 - NJ2	-2.00896	0.0445414	0.0846064
NJ1 - NJ2	-0.43673	0.662307	0.727768
CC1 - UF1	-3.31915	0.000902918	0.0030748
CC1.18 - UF1	-3.14446	0.00166395	0.00503178
CC2 - UF1	-2.62038	0.00878314	0.0212822
CC2.18 - UF1	-3.17357	0.00150575	0.00466535
CJ1 - UF1	1.65958	0.097	0.160113
CJ1.18 - UF1	-1.28108	0.200167	0.281276
CJ2 - UF1	3.31915	0.000902918	0.00310276
CJ2.18 - UF1	1.80515	0.0710509	0.122636
DG1 - UF1	-1.57223	0.115897	0.184849
DG1.18 - UF1	-1.92161	0.0546544	0.0993239
DG2 - UF1	-1.04815	0.294568	0.386621
DG2.18 - UF1	-1.86338	0.0624085	0.111803
IS1 - UF1	2.271	0.0231471	0.048609
IS1.18 - UF1	1.95073	0.0510893	0.0932936
IS2 - UF1	2.00896	0.0445414	0.0850337
IS2.18 - UF1	0.553192	0.580132	0.654597
JJ1 - UF1	3.58119	0.000342035	0.00133288
JJ2 - UF1	2.70773	0.00677456	0.0169588
MY1 - UF1	-0.611422	0.54092	0.623377
MY2 - UF1	-1.31019	0.190131	0.278564
NJ1 - UF1	0.262038	0.793292	0.832957
NJ2 - UF1	0.698768	0.484697	0.581636
CC1 - UF1.18	-3.9888	6.64074e-05	0.000334694
CC1.18 - UF1.18	-3.81411	0.000136674	0.000587077
CC2 - UF1.18	-3.29003	0.00100175	0.00323642
CC2.18 - UF1.18	-3.84323	0.000121427	0.000539994
CJ1 - UF1.18	0.989922	0.322212	0.414273
CJ1.18 - UF1.18	-1.95073	0.0510893	0.0937464
CJ2 - UF1.18	2.6495	0.00806117	0.0196588
CJ2.18 - UF1.18	1.1355	0.256166	0.343372
DG1 - UF1.18	-2.24188	0.024969	0.051295
DG1.18 - UF1.18	-2.59127	0.00956234	0.022591
DG2 - UF1.18	-1.71781	0.085832	0.14356
DG2.18 - UF1.18	-2.53304	0.0113079	0.0259055
IS1 - UF1.18	1.60134	0.109301	0.17732
IS1.18 - UF1.18	1.28108	0.200167	0.282325
IS2 - UF1.18	1.33931	0.180471	0.267522
IS2.18 - UF1.18	-0.116461	0.907287	0.919449
JJ1 - UF1.18	2.91154	0.00359657	0.00985148
JJ2 - UF1.18	2.03807	0.0415425	0.0801176
MY1 - UF1.18	-1.28108	0.200167	0.283383
MY2 - UF1.18	-1.97984	0.0477211	0.0884243
NJ1 - UF1.18	-0.407615	0.683556	0.742484
NJ2 - UF1.18	0.0291154	0.976773	0.981968
UF1 - UF1.18	-0.669653	0.503079	0.590571
CC1 - UF2	-4.542	5.57244e-06	3.82978e-05
CC1.18 - UF2	-4.3673	1.2579e-05	8.0591e-05
CC2 - UF2	-3.84323	0.000121427	0.000546423
CC2.18 - UF2	-4.39642	1.10052e-05	7.17234e-05
CJ1 - UF2	0.43673	0.662307	0.729889
CJ1.18 - UF2	-2.50392	0.0122826	0.0278013
CJ2 - UF2	2.09631	0.0360551	0.0706157
CJ2.18 - UF2	0.582307	0.56036	0.638
DG1 - UF2	-2.79507	0.00518879	0.0135266
DG1.18 - UF2	-3.14446	0.00166395	0.00507236
DG2 - UF2	-2.271	0.0231471	0.0488805
DG2.18 - UF2	-3.08623	0.00202714	0.00598639
IS1 - UF2	1.04815	0.294568	0.387968
IS1.18 - UF2	0.727884	0.466685	0.5636
IS2 - UF2	0.786115	0.4318	0.526518
IS2.18 - UF2	-0.669653	0.503079	0.592411
JJ1 - UF2	2.35834	0.0183567	0.0394252
JJ2 - UF2	1.48488	0.137575	0.21054
MY1 - UF2	-1.83427	0.0666143	0.117117
MY2 - UF2	-2.53304	0.0113079	0.0260634
NJ1 - UF2	-0.960807	0.336649	0.427025
NJ2 - UF2	-0.524076	0.600225	0.671258
UF1 - UF2	-1.22284	0.221388	0.304308
UF1.18 - UF2	-0.553192	0.580132	0.656557
CC1 - UF2.18	-2.91154	0.00359657	0.00992339
CC1.18 - UF2.18	-2.73684	0.00620319	0.0157369
CC2 - UF2.18	-2.21277	0.0269137	0.0546956
CC2.18 - UF2.18	-2.76596	0.00567558	0.0146943
CJ1 - UF2.18	2.06719	0.0387162	0.07505
CJ1.18 - UF2.18	-0.873461	0.382412	0.47394
CJ2 - UF2.18	3.72677	0.000193953	0.000805651
CJ2.18 - UF2.18	2.21277	0.0269137	0.0549913
DG1 - UF2.18	-1.16461	0.244175	0.332008
DG1.18 - UF2.18	-1.514	0.130026	0.200612
DG2 - UF2.18	-0.640538	0.521823	0.608794
DG2.18 - UF2.18	-1.45577	0.145457	0.221704
IS1 - UF2.18	2.67861	0.00739279	0.0181459
IS1.18 - UF2.18	2.35834	0.0183567	0.0396505
IS2 - UF2.18	2.41657	0.0156673	0.0344317
IS2.18 - UF2.18	0.960807	0.336649	0.428463
JJ1 - UF2.18	3.9888	6.64074e-05	0.000339216
JJ2 - UF2.18	3.11534	0.00183731	0.00551194
MY1 - UF2.18	-0.203807	0.838504	0.865996
MY2 - UF2.18	-0.902576	0.366751	0.459046
NJ1 - UF2.18	0.669653	0.503079	0.594262
NJ2 - UF2.18	1.10638	0.268561	0.358713
UF1 - UF2.18	0.407615	0.683556	0.744623
UF1.18 - UF2.18	1.07727	0.281361	0.371868
UF2 - UF2.18	1.63046	0.103004	0.168553
CC1 - YS1	-1.1355	0.256166	0.344594
CC1.18 - YS1	-0.960807	0.336649	0.42991
CC2 - YS1	-0.43673	0.662307	0.732023
CC2.18 - YS1	-0.989922	0.322212	0.415687
CJ1 - YS1	3.84323	0.000121427	0.000553006
CJ1.18 - YS1	0.902576	0.366751	0.460571
CJ2 - YS1	5.5028	3.73803e-08	7.84986e-07
CJ2.18 - YS1	3.9888	6.64074e-05	0.000343863
DG1 - YS1	0.611422	0.54092	0.625284
DG1.18 - YS1	0.262038	0.793292	0.835277
DG2 - YS1	1.1355	0.256166	0.345825
DG2.18 - YS1	0.320269	0.748765	0.804071
IS1 - YS1	4.45465	8.40306e-06	5.67206e-05
IS1.18 - YS1	4.13438	3.55914e-05	0.000197846
IS2 - YS1	4.19261	2.75762e-05	0.000160366
IS2.18 - YS1	2.73684	0.00620319	0.0158433
JJ1 - YS1	5.76484	8.17354e-09	2.05973e-07
JJ2 - YS1	4.89138	1.00132e-06	9.70508e-06
MY1 - YS1	1.57223	0.115897	0.185632
MY2 - YS1	0.873461	0.382412	0.475499
NJ1 - YS1	2.44569	0.0144575	0.032337
NJ2 - YS1	2.88242	0.00394633	0.0107318
UF1 - YS1	2.18365	0.0289879	0.0585958
UF1.18 - YS1	2.8533	0.00432671	0.011437
UF2 - YS1	3.4065	0.000658024	0.00234654
UF2.18 - YS1	1.77604	0.0757269	0.130113
CC1 - YS2	-6.28892	3.1969e-10	1.72633e-08
CC1.18 - YS2	-6.11422	9.70279e-10	3.66765e-08
CC2 - YS2	-5.59015	2.26876e-08	5.35996e-07
CC2.18 - YS2	-6.14334	8.08043e-10	3.39378e-08
CJ1 - YS2	-1.31019	0.190131	0.279648
CJ1.18 - YS2	-4.25084	2.12969e-05	0.000125785
CJ2 - YS2	0.349384	0.726801	0.787194
CJ2.18 - YS2	-1.16461	0.244175	0.333207
DG1 - YS2	-4.542	5.57244e-06	3.9007e-05
DG1.18 - YS2	-4.89138	1.00132e-06	9.96048e-06
DG2 - YS2	-4.01792	5.87144e-05	0.000317058
DG2.18 - YS2	-4.83315	1.3439e-06	1.15454e-05
IS1 - YS2	-0.698768	0.484697	0.583488
IS1.18 - YS2	-1.01904	0.308185	0.398952
IS2 - YS2	-0.960807	0.336649	0.431368
IS2.18 - YS2	-2.41657	0.0156673	0.034633
JJ1 - YS2	0.611422	0.54092	0.627202
JJ2 - YS2	-0.262038	0.793292	0.83761
MY1 - YS2	-3.58119	0.000342035	0.00134676
MY2 - YS2	-4.27996	1.8693e-05	0.000115835
NJ1 - YS2	-2.70773	0.00677456	0.0170719
NJ2 - YS2	-2.271	0.0231471	0.0491551
UF1 - YS2	-2.96977	0.00298027	0.00840702
UF1.18 - YS2	-2.30011	0.0214418	0.045791
UF2 - YS2	-1.74692	0.080651	0.137325
UF2.18 - YS2	-3.37738	0.000731796	0.00256129
YS1 - YS2	-5.15342	2.55782e-07	3.33398e-06

[truncated: 4 more sheets: P2O5, Sand, Silt, Clay]
