# Supplementary material for: Compositional Shift of Bacterial, Archaeal, and Fungal Communities Is Dependent on Trophic Lifestyles in Rice Paddy Soil
Source: Front Microbiol. 2021 Sep 1;12:719486. doi: 10.3389/fmicb.2021.719486 (PMC8440912; doi:10.3389/fmicb.2021.719486)
Supplement: Supplementary file 1 [file Data_Sheet_1.zip › Table 2.XLSX]

## Sheet: Sheet1
Supplementary Table 2. Spearman's Rank Correlation within edaphic factors
ρ (Rho)	pH	SOM1	TN2	CEC3	Ca	Mg	K	Na	P2O5	Sand	Silt	Clay
pH	1	-0.741259	-0.727273	-0.363636	0.258741	0.0769231	0.622378	0.657343	-0.27972	0.426573	-0.300699	-0.370629
SOM	-0.741259	1	0.986014	0.685315	0.167832	0.293706	-0.125874	-0.237762	0.146853	-0.545455	0.51049	0.664336
TN	-0.727273	0.986014	1	0.713287	0.223776	0.356643	-0.118881	-0.202797	0.0629371	-0.58042	0.51049	0.734266
CEC	-0.363636	0.685315	0.713287	1	0.776224	0.825175	0.160839	0.258741	-0.328671	-0.853147	0.79021	0.909091
Ca	0.258741	0.167832	0.223776	0.776224	1	0.944056	0.538462	0.699301	-0.636364	-0.622378	0.538462	0.734266
Mg	0.0769231	0.293706	0.356643	0.825175	0.944056	1	0.286713	0.622378	-0.664336	-0.762238	0.629371	0.846154
K	0.622378	-0.125874	-0.118881	0.160839	0.538462	0.286713	1	0.587413	-0.216783	0.20979	-0.132867	0.041958
Na	0.657343	-0.237762	-0.202797	0.258741	0.699301	0.622378	0.587413	1	-0.552448	-0.195804	0.160839	0.321678
P2O5	-0.27972	0.146853	0.0629371	-0.328671	-0.636364	-0.664336	-0.216783	-0.552448	1	0.195804	0.00699301	-0.503497
Sand	0.426573	-0.545455	-0.58042	-0.853147	-0.622378	-0.762238	0.20979	-0.195804	0.195804	1	-0.881119	-0.832168
Silt	-0.300699	0.51049	0.51049	0.79021	0.538462	0.629371	-0.132867	0.160839	0.00699301	-0.881119	1	0.664336
Clay	-0.370629	0.664336	0.734266	0.909091	0.734266	0.846154	0.041958	0.321678	-0.503497	-0.832168	0.664336	1
p-value	pH	SOM	TN	CEC	Ca	Mg	K	Na	P2O5	Sand	Silt	Clay
pH	#N/A	0.00580115	0.00735503	0.245265	0.416775	0.812183	0.0306759	0.0201855	0.378569	0.1667	0.34226	0.235621
SOM	0.00580115	#N/A	4.1169e-09	0.013906	0.602099	0.354148	0.696683	0.456801	0.648796	0.0666119	0.0899137	0.0184527
TN	0.00735503	4.1169e-09	#N/A	0.00920178	0.484452	0.255138	0.712884	0.527302	0.845931	0.047856	0.0899137	0.00654349
CEC	0.245265	0.013906	0.00920178	#N/A	0.00299286	0.000951363	0.617523	0.416775	0.296904	0.000418118	0.00222314	4.19104e-05
Ca	0.416775	0.602099	0.484452	0.00299286	#N/A	3.92726e-06	0.0708943	0.0113742	0.0260969	0.0306759	0.0708943	0.00654349
Mg	0.812183	0.354148	0.255138	0.000951363	3.92726e-06	#N/A	0.366251	0.0306759	0.0184527	0.00395045	0.0283197	0.000521134
K	0.0306759	0.696683	0.712884	0.617523	0.0708943	0.366251	#N/A	0.0446093	0.498556	0.512841	0.680598	0.896986
Na	0.0201855	0.456801	0.527302	0.416775	0.0113742	0.0306759	0.0446093	#N/A	0.0625115	0.541936	0.617523	0.30791
P2O5	0.378569	0.648796	0.845931	0.296904	0.0260969	0.0184527	0.498556	0.0625115	#N/A	0.541936	0.982792	0.0951574
Sand	0.1667	0.0666119	0.047856	0.000418118	0.0306759	0.00395045	0.512841	0.541936	0.541936	#N/A	0.000152674	0.000785442
Silt	0.34226	0.0899137	0.0899137	0.00222314	0.0708943	0.0283197	0.680598	0.617523	0.982792	0.000152674	#N/A	0.0184527
Clay	0.235621	0.0184527	0.00654349	4.19104e-05	0.00654349	0.000521134	0.896986	0.30791	0.0951574	0.000785442	0.0184527	#N/A
1SOM, soil organic matters
2TN, total nitrogen
3CEC, Cation exchange capacity
