# Supplementary material for: Compositional Shift of Bacterial, Archaeal, and Fungal Communities Is Dependent on Trophic Lifestyles in Rice Paddy Soil
Source: Front Microbiol. 2021 Sep 1;12:719486. doi: 10.3389/fmicb.2021.719486 (PMC8440912; doi:10.3389/fmicb.2021.719486)
Supplement: Supplementary file 1 [file Data_Sheet_1.zip › Table 3.XLSX]

## Sheet: Content
Supplementary Table 3. Results of PERMANOVA, pairwise PERMANOVA, and beta dispersion
Sheet label	Content
Sheet 1	Results of PERMANOVA on bacterial, archaeal, and fungal communities
Sheet 2	Results of Pairwise PERMANOVA and beta dispersion

## Sheet: Sheet1
Bacteria
All variables									Fertilization versus pesticide
	Df	SumsOfSqs	MeanSqs	F.Model	R2	Pr(>F)	Significance			Df	SumsOfSqs	MeanSqs	F.Model	R2	Pr(>F)
Year	1	3.221	3.2213	14.3082	0.0404	0.0001	***		fertilization	1	1.142	1.14158	3.7088	0.01448	0.0001	***
pH	1	2.577	2.5765	11.4442	0.03231	0.0001	***		pesticide	1	1.063	1.06259	3.2129	0.01269	0.0001	***
SOM	1	1.739	1.7387	7.7228	0.0218	0.0001	***		Residuals	249	76.644	0.30781		0.97283
TN	1	1.847	1.8469	8.2034	0.02316	0.0001	***		Total	251	78.848			1
CEC	1	1.671	1.671	7.4222	0.02095	0.0001	***		---
Ca	1	1.46	1.4605	6.4869	0.01831	0.0001	***		Signif. codes: 0 ‘***’ 0.001 ‘**’ 0.01 ‘*’ 0.05 ‘.’ 0.1 ‘ ’ 1
Mg	1	2.014	2.0142	8.9467	0.02526	0.0001	***
K	1	1.456	1.4563	6.4685	0.01826	0.0001	***
Na	1	1.264	1.264	5.6142	0.01585	0.0001	***
P2O5	1	1.581	1.581	7.0222	0.01983	0.0001	***
Sand	1	1.078	1.078	4.788	0.01352	0.0001	***
Silt	1	0.893	0.8927	3.9651	0.01119	0.0001	***
Soil_texture	5	2.943	0.5886	2.6144	0.03691	0.0001	***
Cultural_practice	2	1.323	0.6617	2.939	0.0166	0.0001	***
Location	9	3.92	0.4355	1.9344	0.04915	0.0001	***
Field	10	2.803	0.2803	1.245	0.03515	0.0001	***
Residuals	213	47.954	0.2251		0.60135
Total	251	79.744			1
---
Signif. codes: 0 ‘***’ 0.001 ‘**’ 0.01 ‘*’ 0.05 ‘.’ 0.1 ‘ ’ 1
Archaea
All variables									Fertilization versus pesticide
	Df	SumsOfSqs	MeanSqs	F.Model	R2	Pr(>F)	Significance			Df	SumsOfSqs	MeanSqs	F.Model	R2	Pr(>F)
Year	1	4.867	4.867	29.9343	0.07448	0.0001	***		fertilization	1	1.213	1.21258	4.1201	0.01609	0.0001	***
pH	1	1.772	1.7718	10.8971	0.02711	0.0001	***		pesticide	1	0.855	0.85454	2.9036	0.01134	0.0014	**
SOM	1	2.04	2.0403	12.5487	0.03122	0.0001	***		Residuals	249	73.282	0.29431		0.97257
TN	1	1.825	1.825	11.2247	0.02793	0.0001	***		Total	251	75.349			1
CEC	1	1.873	1.873	11.5195	0.02866	0.0001	***		---
Ca	1	2.049	2.0493	12.6042	0.03136	0.0001	***		Signif. codes: 0 ‘***’ 0.001 ‘**’ 0.01 ‘*’ 0.05 ‘.’ 0.1 ‘ ’ 1
Mg	1	1.144	1.1436	7.0338	0.0175	0.0001	***
K	1	1.552	1.5522	9.5468	0.02375	0.0001	***
Na	1	1.791	1.791	11.0154	0.02741	0.0001	***
P2O5	1	2.04	2.0396	12.5446	0.03121	0.0001	***
Sand	1	0.662	0.662	4.0715	0.01013	0.0001	***
Silt	1	1.012	1.0116	6.2216	0.01548	0.0001	***
Soil_texture	5	2.574	0.5147	3.1658	0.03938	0.0001	***
Cultural_practice	2	0.979	0.4894	3.0098	0.01498	0.0001	***
Location	9	3.269	0.3633	2.2342	0.05003	0.0001	***
Field	10	1.267	0.1267	0.7792	0.01939	0.9958
Residuals	213	34.632	0.1626		0.52997
Total	251	65.347			1
---
Signif. codes: 0 ‘***’ 0.001 ‘**’ 0.01 ‘*’ 0.05 ‘.’ 0.1 ‘ ’ 1
Fungi
All variables									Fertilization versus pesticide
	Df	SumsOfSqs	MeanSqs	F.Model	R2	Pr(>F)	Significance			Df	SumsOfSqs	MeanSqs	F.Model	R2	Pr(>F)
Year	1	17.047	17.0469	200.886	0.26633	0.0001	***		fertilization	1	2.603	2.60332	9.7644	0.03714	0.0001	***
pH	1	1.636	1.636	19.279	0.02556	0.0001	***		pesticide	1	1.097	1.09748	4.1164	0.01566	0.0001	***
SOM	1	1.433	1.4329	16.886	0.02239	0.0001	***		Residuals	249	66.387	0.26661		0.9472
TN	1	1.466	1.4657	17.273	0.0229	0.0001	***		Total	251	70.087			1
CEC	1	1.616	1.6155	19.038	0.02524	0.0001	***		---
Ca	1	1.234	1.2342	14.544	0.01928	0.0001	***		Signif. codes: 0 ‘***’ 0.001 ‘**’ 0.01 ‘*’ 0.05 ‘.’ 0.1 ‘ ’ 1
Mg	1	1.941	1.9413	22.877	0.03033	0.0001	***
K	1	1.05	1.0504	12.378	0.01641	0.0001	***
Na	1	1.126	1.1265	13.275	0.0176	0.0001	***
P2O5	1	1.089	1.0886	12.829	0.01701	0.0001	***
Sand	1	1.447	1.4466	17.047	0.0226	0.0001	***
Silt	1	0.827	0.8272	9.748	0.01292	0.0001	***
Soil_texture	5	3.652	0.7305	8.608	0.05706	0.0001	***
Cultural_practice	2	1.383	0.6915	8.149	0.02161	0.0001	***
Location	9	6.293	0.6992	8.24	0.09832	0.0001	***
Field	10	2.691	0.2691	3.171	0.04204	0.0001	***
Residuals	213	18.075	0.0849		0.2824
Total	251	64.006			1
---
Signif. codes: 0 ‘***’ 0.001 ‘**’ 0.01 ‘*’ 0.05 ‘.’ 0.1 ‘ ’ 1

## Sheet: Sheet2
	Pairwise PERMANOVA
	Bacteria	Conventional (CF)	No_fertilizer (NF)
	No_fertilizer	0.0001	-
	No_pesticide (NP)	0.0001	0.0001
	Fungi	Conventional	No_fertilizer
	No_fertilizer	0.00015	-
	No_pesticide	0.0003	0.00015
	Archaea	Conventional	No_fertilizer
	No_fertilizer	0.0003	-
	No_pesticide	0.0009	0.0003
	Beta dispersion
	Bacteria					Fungi					Archaea
	Soil site	Cultural practice	P value			Soil site	Cultural practice	P value			Soil site	Cultural practice	P value
2017	Chuncheon	CF/NP	0.7763		2017	Chuncheon	CF/NP	0.5574		2017	Chuncheon	CF/NP	0.7773
	Cheongju	NF/NP	0.0001			Cheongju	NF/NP	0.3724			Cheongju	NF/NP	0.295
	Daegu	CF/NP	0.3996			Daegu	CF/NP	0.383			Daegu	CF/NP	0.128
	Iksan	CF/NP	0.29			Iksan	CF/NP	0.903			Iksan	CF/NP	0.8025
	Jinju	CF/NF	0.0041			Jinju	CF/NF	0.7225			Jinju	CF/NF	0.5497
	Mirayng	CF/NF	0.3643			Mirayng	CF/NF	0.3857			Mirayng	CF/NF	0.5986
	Naju	CF/NF	0.7398			Naju	CF/NF	0.2182			Naju	CF/NF	0.6845
	Yesan	NF/NP	0.0059			Yesan	NF/NP	0.396			Yesan	NF/NP	0.9325
2018	Chuncheon	CF/NP	0.025		2018	Chuncheon	CF/NP	0.3626		2018	Chuncheon	CF/NP	0.8447
	Cheongju	NF/NP	0.1959			Cheongju	NF/NP	0.6469			Cheongju	NF/NP	0.042
	Daegu	CF/NP	0.0001			Daegu	CF/NP	0.0588			Daegu	CF/NP	0.079
	Iksan	CF/NP	0.3933			Iksan	CF/NP	0.2135			Iksan	CF/NP	0.4098
	CF, convetional farming; NF, no fertilizer; NP, no pesticide
