# Supplementary material for: Compositional Shift of Bacterial, Archaeal, and Fungal Communities Is Dependent on Trophic Lifestyles in Rice Paddy Soil
Source: Front Microbiol. 2021 Sep 1;12:719486. doi: 10.3389/fmicb.2021.719486 (PMC8440912; doi:10.3389/fmicb.2021.719486)
Supplement: Supplementary file 1 [file Data_Sheet_1.zip › Table 4.XLSX]

## Sheet: Sheet1
Supplementary Table 4. Correlation between Principal coordinates (PCos) and edaphic factors in bacterial, archaeal, and fungal communities
1SOM, soil organic matters
2TN, total nitrogen
3CEC, Cation exchange capacity
Bacteria
Correlation	PCo1	PCo2	PCo3	PCo4	PCo5	PCo6	PCo7	PCo8	PCo9	PCo10	PCo11	PCo12	PCo13	PCo14	PCo15	PCo16	PCo17	PCo18	PCo19	PCo20	PCo21	PCo22	PCo23	PCo24	PCo25	PCo26	PCo27	PCo28	PCo29	PCo30	PCo31	PCo32	PCo33	PCo34	PCo35	PCo36	PCo37	PCo38	PCo39	PCo40	PCo41	PCo42	PCo43	PCo44	PCo45	PCo46	PCo47	PCo48	PCo49
Year	-0.097605	0.216381	-0.893272	0.227678	0.100221	-0.120655	-0.127298	0.0294287	-0.125861	-0.060058	-0.0199254	0.0325819	0.000470839	-0.00277655	0.023705	-0.0237084	0.0548589	0.026436	-0.0119038	0.0143828	0.0179798	-0.0192163	-0.00237762	0.0155872	0.0026482	-0.0190492	0.0150885	0.0166362	0.00360485	-0.0121133	0.00180702	-0.0237545	0.00756471	0.0119452	0.0267112	-0.025408	0.00372073	-0.018877	-0.00331081	-0.00870958	0.0190212	0.0051565	-0.0141978	0.00842139	-0.00887502	0.0120561	-0.00579512	-0.0155876	0.0135801
pH	0.252717	-0.578566	-0.139344	0.431315	0.0040614	-0.366109	-0.0603044	0.0378459	0.0289264	0.0515815	0.0400029	0.0420447	-0.221746	0.206235	0.136084	-0.13202	-0.0430649	-0.0714785	0.00939199	0.0330716	0.0311157	-0.0348337	-0.0331096	0.0339737	-0.00503185	0.031796	-0.00721099	-0.025894	0.0204301	-0.0125901	-0.000402456	0.00270429	2.83035e-05	-0.00695755	-0.0474977	-0.0129525	-0.0118107	0.0211423	-0.0371635	-0.00830856	0.0285912	-0.0199094	0.0362251	0.00990532	-0.0378067	0.0310937	-0.0313258	-0.0275015	-0.00589453
SOM1	0.151461	0.449503	0.12038	-0.572132	-0.0221717	0.222432	-0.328556	0.12277	0.146596	0.312008	0.0704181	0.0122965	-0.034753	-0.0449371	0.0130174	-0.0729334	-0.0605782	-0.0624823	0.0383567	0.0453649	-0.00761759	0.0193531	0.0146202	-0.0618285	-0.00780833	0.0489396	0.0256025	0.034464	-0.0662487	0.0457899	0.00340222	-0.0399353	-0.00617002	0.0149813	0.104612	0.0168356	-0.0113201	0.00906577	0.044165	-0.0565739	0.00901578	0.000521109	0.019671	-0.0204054	-0.0154444	-0.0144418	-0.00490368	-0.01318	-0.0116663
TN2	0.276341	0.454792	0.00354222	-0.609137	0.00144469	0.156828	-0.245202	-0.0138017	0.0977043	0.27761	-0.0130613	-0.00749	-0.0159664	-0.0528204	0.00710566	-0.0842604	-0.0559523	-0.045286	0.0175865	0.033545	-0.0172259	0.00369518	0.0302041	-0.0995534	-0.0183621	0.060844	0.0478671	0.0511211	-0.0585048	0.0499196	-0.0102548	-0.0538543	-0.00657523	0.0306699	0.130542	0.00435186	-0.00209284	-0.00368988	0.0524142	-0.0758013	0.00904375	-0.00466556	0.0120638	-0.0426188	-0.0271801	0.00621763	-0.00417533	-0.00953047	-0.00737282
CEC3	0.04048	0.531709	0.298664	-0.0902528	-0.191043	0.189934	-0.582272	-0.00801269	0.10649	0.0338817	-0.0330885	-0.0693849	-0.24281	0.123128	0.0802	0.0564398	-0.0679177	-0.0301756	-0.0580279	0.0174921	-0.101279	0.0338859	-0.0081579	-0.0335147	-0.0340779	-0.0108089	0.0615654	0.0573962	-0.0135218	0.030109	-0.005649	-0.0424396	-0.0090938	0.0082067	0.0760135	-0.033011	0.0114038	0.0167886	0.0256194	0.0177685	-0.0114893	-0.0339608	0.0404784	0.0162572	-0.035898	-0.00126856	0.0124654	-0.0266005	0.00528739
Ca	0.506949	0.252364	0.312687	-0.199743	-0.131246	-0.139546	-0.462654	0.0793983	0.0842106	0.0139678	-0.0272954	0.0128992	-0.226084	0.289606	0.178575	-0.124005	-0.0632453	-0.0537825	-0.0324069	0.0221722	-0.0688788	0.0197234	-0.0395684	0.0444206	-0.0423352	0.0175746	0.00336302	0.0144731	0.00235748	-0.00856084	-0.0155514	-0.0115567	-0.000711537	0.000716554	0.0104541	-0.0305257	-0.000686461	0.0451135	-0.0283549	0.0381444	0.0160704	-0.0190689	0.0531678	0.0252875	-0.0366434	-0.00634098	-0.00248003	-0.0122651	0.0109602
Mg	0.352549	0.65643	0.36767	0.168569	0.0336136	-0.160249	-0.169568	-0.0525459	-0.0965373	0.00866383	-0.0841225	0.0226375	-0.156916	0.18326	0.16044	-0.0460996	0.00925899	0.104202	-0.0415438	0.0487025	-0.021181	-0.0267017	0.0136798	0.0166968	-0.0219627	0.000620523	0.0386729	0.00791767	-0.0345523	0.0126898	-0.0290523	0.0059053	0.0481969	-0.00822223	-0.0361724	-0.0207942	-0.0330992	0.0530438	-0.01997	0.0460378	0.0259776	-0.0245313	0.0347778	0.0487284	-0.047252	0.0200585	-0.0397074	-0.0400306	0.0373577
K	0.391791	-0.158785	0.225285	-0.0100036	0.12155	0.22944	-0.637787	-0.0292267	-0.0851638	-0.148334	0.172673	0.0412069	-0.169062	0.162071	0.166669	-0.158628	-0.0579347	-0.0501153	-0.0250214	-6.08609e-05	-0.0478416	0.0118161	-0.0380189	0.0202521	-0.00550153	0.0112198	0.00671187	-0.0152045	0.0252462	-0.019089	-0.0360837	-0.0603039	0.0153042	0.0232041	-0.00269477	-0.0594383	0.0442319	0.0266429	-0.0117356	0.00976121	0.00675231	-0.040258	0.0331507	0.00930803	-0.0397226	0.0311653	0.00821805	-0.0295125	-0.0181893
Na	0.440483	0.0568112	0.391373	0.356643	0.0482421	-0.0443796	-0.0119416	0.455033	0.0766032	-0.048096	-0.0758913	0.108043	-0.223379	0.324514	0.033567	-0.0175723	-0.0936062	-0.0648677	-0.0290964	0.0381557	-0.0439359	0.0320985	-0.0471686	0.0528328	-0.00173431	0.0178173	0.0112166	0.0488449	0.0189008	0.0248502	0.036497	0.0194818	-0.057578	0.00948544	-0.0233282	0.00697398	0.0138272	-0.0113254	-0.0242134	0.0195794	0.0462672	0.018318	0.0214921	0.0251873	-0.0468352	-0.019866	-0.0400036	0.00694601	-0.00281736
P2O5	-0.753532	-0.403699	-0.116703	-0.202029	-0.0393439	0.0230232	-0.3143	-0.0629916	0.105699	0.10538	0.0474684	0.0548407	-0.0226469	-0.0462959	0.136754	-0.092245	-0.0633746	-0.0153194	0.0321384	0.0104828	-0.0525618	0.0491071	-0.00888939	0.0350723	-0.0135668	-0.00604494	0.00681741	0.0186756	-0.0221839	0.0150685	-0.0123545	-0.0109541	0.0143373	0.020966	-0.0128664	0.000682462	0.0105806	0.0271917	-0.0139305	0.00841235	0.00944606	-0.022493	0.00642792	0.00441099	-0.00512863	-0.0116917	0.0175633	-1.22575e-06	0.0182981
Sand	-0.0625474	-0.515941	-0.316416	0.198759	0.444184	-0.00241874	0.44673	0.000788828	0.0591877	0.0367654	0.197266	-0.0243767	0.209982	-0.106247	-0.134746	-0.0530184	0.0401473	-0.0409584	0.0714659	-0.0266694	0.0800175	-0.022146	0.00553295	-0.00371033	0.026885	0.0180159	-0.0208938	-0.0434001	0.0168077	-0.0236964	0.0162711	0.0297504	0.00998833	-0.00031081	-0.0304777	0.033729	-0.0183146	-0.0273796	-0.0183728	-0.0597332	0.00845338	0.0368711	-0.033562	-0.0131685	0.0227117	-0.0122437	-0.000588042	0.0270475	-0.0158047
Silt	-0.144138	0.145172	0.189407	-0.313545	-0.452325	-0.0568524	-0.466475	-0.0803272	-0.0583953	-0.156736	-0.302018	0.0900443	-0.298121	0.149743	0.155692	0.0557259	-0.061158	0.0376079	-0.100262	0.0282268	-0.115334	0.0356847	-0.00819931	0.0100457	-0.0324409	-0.0290189	0.0114427	0.0539578	-0.012312	0.0336075	-0.0219342	-0.0581458	-0.022192	0.0104685	0.0148284	-0.0505654	0.0420266	0.0304935	0.0227789	0.0710698	-0.0142461	-0.0499758	0.030292	0.00907605	-0.0230677	0.0259286	0.00869772	-0.0339023	0.0241282
Clay	0.258292	0.747721	0.354519	-0.0210184	-0.304424	0.0631404	-0.29419	0.0818888	-0.0425106	0.0984585	-0.0303661	-0.0508971	-0.0565435	0.0297506	0.0731984	0.0345374	-0.00649961	0.0323221	-0.0204892	0.0171705	-0.0197535	0.00156539	-0.00113338	-0.00395343	-0.0131777	-0.00128468	0.0245131	0.0196257	-0.0164986	0.00641749	-0.00559058	0.00847794	0.00561418	-0.0103099	0.0376882	-0.00630561	-0.0116784	0.0160573	0.00837392	0.0303226	5.01844e-05	-0.0123868	0.027029	0.0135174	-0.0156281	-0.00556099	-0.00799179	-0.0119458	0.00250448
P value	PCo1	PCo2	PCo3	PCo4	PCo5	PCo6	PCo7	PCo8	PCo9	PCo10	PCo11	PCo12	PCo13	PCo14	PCo15	PCo16	PCo17	PCo18	PCo19	PCo20	PCo21	PCo22	PCo23	PCo24	PCo25	PCo26	PCo27	PCo28	PCo29	PCo30	PCo31	PCo32	PCo33	PCo34	PCo35	PCo36	PCo37	PCo38	PCo39	PCo40	PCo41	PCo42	PCo43	PCo44	PCo45	PCo46	PCo47	PCo48	PCo49
Year	0.122244	0.000542309	0	0.000268141	0.112501	0.0557727	0.0434914	0.641971	0.0459346	0.342362	0.75294	0.606702	0.994066	0.965018	0.708042	0.708002	0.385843	0.676206	0.85085	0.820271	0.776392	0.761462	0.970042	0.805509	0.966634	0.763475	0.811613	0.792707	0.954592	0.848256	0.977229	0.70746	0.904887	0.850337	0.673029	0.688126	0.953134	0.765551	0.958293	0.890576	0.763813	0.935084	0.822544	0.894175	0.888511	0.848964	0.927065	0.805504	0.830145
pH	4.95226e-05	0	0.0269795	7.69829e-13	0.948849	2.06982e-09	0.340382	0.549832	0.647667	0.414899	0.527307	0.506425	0.000389835	0.000990984	0.0308047	0.0362142	0.496155	0.258269	0.882062	0.601303	0.622995	0.582055	0.600885	0.591413	0.93665	0.615412	0.909314	0.682482	0.746893	0.84236	0.994928	0.965928	0.999643	0.912489	0.452846	0.837885	0.852003	0.738386	0.557054	0.895585	0.651479	0.753133	0.567061	0.875667	0.550245	0.623241	0.620648	0.663937	0.925817
SOM	0.0161146	6.17284e-14	0.0563364	0	0.726145	0.000373526	9.36268e-08	0.0515827	0.0199038	4.30145e-07	0.265417	0.84599	0.582931	0.477601	0.837082	0.24868	0.33819	0.323197	0.544455	0.473415	0.904225	0.759816	0.817356	0.328296	0.901839	0.439231	0.685865	0.58607	0.294828	0.469276	0.957142	0.528005	0.922361	0.812927	0.0975288	0.790281	0.858084	0.886131	0.485207	0.371143	0.886754	0.993433	0.755994	0.747188	0.807256	0.819546	0.93826	0.835077	0.853792
TN	8.50872e-06	2.88658e-14	0.95538	0	0.981794	0.0126802	8.37824e-05	0.827416	0.121863	7.70393e-06	0.836541	0.905822	0.800875	0.403767	0.910634	0.182429	0.376431	0.474185	0.781158	0.596104	0.785535	0.953456	0.633219	0.114929	0.771766	0.336071	0.449336	0.419081	0.355013	0.430111	0.871318	0.394615	0.91728	0.627986	0.0383722	0.945196	0.973629	0.953522	0.407397	0.230508	0.886405	0.941253	0.848869	0.500633	0.667629	0.921764	0.947416	0.880336	0.907288
CEC	0.522389	0	1.37762e-06	0.153144	0.00232116	0.00246398	0	0.899283	0.0916276	0.592418	0.601117	0.272511	9.87048e-05	0.050901	0.204494	0.37228	0.282804	0.63354	0.358955	0.782303	0.108738	0.592373	0.897468	0.596436	0.590276	0.86443	0.330362	0.364219	0.830864	0.63429	0.928899	0.502436	0.885781	0.896858	0.229202	0.601969	0.857046	0.790852	0.685668	0.778951	0.855986	0.591554	0.522405	0.797326	0.570569	0.984013	0.843901	0.674307	0.93344
Ca	0	5.07768e-05	4.04774e-07	0.00143637	0.0373307	0.026756	8.88178e-15	0.20907	0.182688	0.825373	0.666304	0.838542	0.000296794	2.93857e-06	0.00446086	0.0492612	0.317311	0.395246	0.608637	0.72614	0.276032	0.755365	0.531807	0.482681	0.503489	0.781302	0.957636	0.819162	0.970295	0.892433	0.805946	0.855151	0.991033	0.990969	0.868839	0.629605	0.991349	0.475872	0.654173	0.546687	0.799606	0.763237	0.400678	0.689529	0.56259	0.920217	0.968752	0.846378	0.86255
Mg	8.68757e-09	0	1.74714e-09	0.00732119	0.595352	0.010843	0.00697591	0.406218	0.126404	0.891147	0.183148	0.720629	0.0126297	0.00350628	0.0107478	0.466272	0.883721	0.098854	0.511508	0.441453	0.737924	0.673139	0.828918	0.79197	0.728625	0.99218	0.54114	0.900471	0.585109	0.841128	0.646238	0.925682	0.446215	0.896664	0.567626	0.74254	0.600999	0.401779	0.752406	0.466871	0.681512	0.698353	0.582661	0.44121	0.45519	0.751344	0.530365	0.527021	0.554994
K	1.13183e-10	0.0115983	0.000312197	0.874443	0.0539667	0.000239475	0	0.64426	0.177767	0.0184695	0.00599339	0.514941	0.00714884	0.00996414	0.00802061	0.0116822	0.359729	0.428304	0.692629	0.999233	0.449578	0.851936	0.548008	0.749024	0.930751	0.859328	0.915567	0.810192	0.69001	0.762996	0.568577	0.340386	0.808972	0.713938	0.966048	0.347374	0.484545	0.673818	0.852934	0.877462	0.91506	0.524675	0.600432	0.883109	0.530208	0.622441	0.896716	0.641023	0.773856
Na	2.19824e-13	0.369137	1.18909e-10	5.67369e-09	0.445788	0.483086	0.850382	2.77556e-14	0.225599	0.447168	0.229953	0.0869662	0.000352014	1.37031e-07	0.595863	0.78133	0.138388	0.305031	0.645737	0.546568	0.487476	0.612053	0.455987	0.403657	0.978145	0.778359	0.859369	0.440118	0.765264	0.694627	0.564153	0.758268	0.362699	0.880898	0.712477	0.912283	0.827102	0.858018	0.702075	0.757096	0.464652	0.7723	0.734218	0.690696	0.459182	0.753654	0.5273	0.912633	0.964504
P2O5	0	2.69442e-11	0.0643552	0.00126199	0.534139	0.716072	3.50157e-07	0.319261	0.0940763	0.0950809	0.453125	0.386	0.720518	0.464374	0.0299824	0.144241	0.316321	0.808785	0.61161	0.868482	0.406076	0.437664	0.888331	0.579471	0.830309	0.92393	0.914245	0.767981	0.726001	0.811858	0.845273	0.862627	0.82083	0.740489	0.838946	0.991399	0.867266	0.667495	0.825831	0.894288	0.881388	0.722339	0.919127	0.944453	0.935434	0.853477	0.781439	0.999985	0.77254
Sand	0.322692	0	2.8913e-07	0.00151799	1.31006e-13	0.969524	9.14824e-14	0.990059	0.349415	0.561289	0.00165005	0.700163	0.00079576	0.0923751	0.032504	0.402005	0.525816	0.517481	0.258354	0.673511	0.205529	0.72645	0.930356	0.953265	0.671025	0.775954	0.74135	0.492805	0.79062	0.708143	0.797157	0.638334	0.874634	0.996083	0.630144	0.594089	0.772341	0.665336	0.771637	0.344983	0.893775	0.560164	0.595918	0.835218	0.719751	0.846643	0.992589	0.669154	0.802851
Silt	0.0220967	0.0211496	0.00253462	3.74799e-07	4.10783e-14	0.368789	5.10703e-15	0.203775	0.355916	0.0127327	1.03373e-06	0.1541	1.44269e-06	0.0173737	0.0133478	0.378367	0.333578	0.552345	0.112354	0.655635	0.0675676	0.572863	0.89695	0.87392	0.60826	0.646617	0.856564	0.393706	0.845798	0.595418	0.728963	0.357978	0.725905	0.868661	0.814801	0.424162	0.506608	0.629966	0.718957	0.261008	0.821951	0.429592	0.632231	0.886002	0.715547	0.68208	0.890724	0.592193	0.703074
Clay	3.31715e-05	0	7.08308e-09	0.739863	8.39409e-07	0.318117	2.00924e-06	0.195093	0.501722	0.118997	0.631398	0.421125	0.3714	0.638332	0.24696	0.585272	0.918228	0.609575	0.746186	0.786208	0.755004	0.980273	0.985717	0.950207	0.835105	0.98381	0.698565	0.756538	0.794383	0.919257	0.929632	0.893469	0.929336	0.870633	0.551497	0.92066	0.853642	0.799765	0.894768	0.631886	0.999368	0.844872	0.669367	0.830918	0.805008	0.930004	0.899544	0.85033	0.968444
Archaea
Correlation	PCo1	PCo2	PCo3	PCo4	PCo5	PCo6	PCo7	PCo8	PCo9	PCo10	PCo11	PCo12	PCo13	PCo14	PCo15	PCo16	PCo17	PCo18	PCo19	PCo20	PCo21	PCo22	PCo23	PCo24	PCo25	PCo26	PCo27	PCo28	PCo29	PCo30	PCo31	PCo32	PCo33	PCo34	PCo35	PCo36	PCo37	PCo38	PCo39	PCo40	PCo41	PCo42	PCo43	PCo44	PCo45	PCo46	PCo47	PCo48	PCo49
Year	-0.660031	0.251299	0.529112	-0.0399682	-0.0767287	0.0863294	-0.104297	0.140596	0.0621145	-0.0177795	0.00123924	-0.0531212	0.0632804	-0.0989604	-0.00707044	0.00109642	0.0793347	0.0211107	-0.0463125	-0.0114014	-0.00351109	0.0245718	-0.0191306	-0.0224978	-0.00688092	0.00489054	-0.0641095	0.031177	0.0879494	0.0232085	0.0386742	-0.0403592	-0.0130832	-0.0393255	-0.00971542	-0.0408503	-0.00811338	0.0425587	-0.0384657	-0.0164052	-0.00749542	0.0584523	-0.0024419	0.0277955	0.00264423	-0.0059411	-0.0486998	-0.0537035	0.0167983
pH	-0.281922	0.043633	-0.308426	-0.164743	-0.140438	0.317767	-0.194566	0.0162582	-0.00965616	0.264909	-0.0123695	-0.16759	-0.0743475	-0.035014	0.0379708	-0.131426	-0.0380191	0.0882083	-0.0357071	-0.0215784	-0.0762371	-0.0633893	0.00576505	-0.0407797	-0.0724601	0.0235362	-0.00617022	0.0494067	-0.0244409	0.132282	0.0896138	0.0591918	0.14167	-0.0979672	-0.0937677	0.0867163	-0.0808519	-0.0210886	-0.113156	-0.101099	0.00567818	-0.0921716	0.0165004	0.120509	0.00316892	0.120181	0.160014	-0.0221575	-0.0452027
SOM	0.420489	0.255902	0.319596	0.0368164	-0.0300568	-0.331653	0.111267	-0.205138	0.0636222	-0.0331675	0.0747247	0.0667281	-0.000937089	0.0117475	-0.0504335	0.163644	-0.0808286	-0.0401642	0.118933	-0.0700334	0.0959905	0.0638131	-0.0383122	-0.0499508	-0.00124093	0.112754	0.123642	-0.0366848	-0.00640715	-0.0253571	0.012513	-0.0276006	0.051113	0.148691	0.0529701	0.0825019	0.032571	0.0269869	0.0589148	0.061301	-0.0101673	0.0595504	0.0126857	-0.0357133	0.0518674	-0.0597422	-0.0232338	0.0286573	-4.93337e-05
TN	0.426063	0.373974	0.370551	-0.0139344	-0.0169034	-0.29731	0.0298743	-0.162988	0.081255	-0.0492813	0.101141	0.0391544	-0.00859015	0.0652387	-0.0223415	0.172167	-0.0296571	-0.0478468	0.105591	-0.0861947	0.0935654	0.0390518	-0.0553191	-0.0601485	-0.0109132	0.0969168	0.0658689	-0.0664773	0.0337787	-0.0290754	0.00714699	-0.0396446	0.0289391	0.0962075	0.0318023	0.0427704	0.0588686	0.0114227	0.0609919	0.0650052	0.0654789	0.0301005	-0.000813175	-0.0271003	0.035694	-0.0598079	-0.0185425	0.0254727	0.037187
CEC	0.283744	0.223221	0.0486906	0.429653	-0.2465	-0.10154	-0.0197025	-0.0285413	0.0246904	0.0453782	0.149777	0.0816992	-0.018049	-0.0178489	-0.130006	0.129172	-0.0809991	0.0371141	0.0456936	0.0718724	0.0258563	0.107296	-0.0651216	-0.0123735	-0.0215131	0.126019	0.17015	-0.0151628	-0.0597782	-0.108478	-0.0174254	-0.0289464	0.0361676	0.0423686	0.0415341	0.0228419	0.036218	0.05144	0.0117834	0.121541	-0.0736136	0.106952	0.0238998	-0.0498519	0.0608072	-0.120512	-0.0112942	0.0340596	-0.0267429
Ca	0.491589	0.450583	-0.0604608	0.121809	-0.190234	0.11787	-0.0512092	-0.00850917	-0.00677544	0.192648	0.0847477	-0.0397139	-0.0511927	-0.0154936	-0.0481953	0.0464518	-0.0870322	0.0355295	-0.0242566	0.025992	0.0389616	0.0247537	-0.0533333	-0.0252337	-0.0563742	0.103367	0.164722	-0.0222322	-0.0589653	-0.0106513	0.0163169	-0.0230928	0.081633	0.00844706	-0.0342996	0.0603229	0.0030963	0.0829141	-0.0343069	0.0276525	-0.0777506	0.0360238	0.0157957	-0.0172441	0.0585155	-0.00191722	0.0658249	0.0289719	-0.0428886
Mg	0.337365	0.429112	-0.0849509	0.329965	-0.196061	0.264866	0.175176	0.164076	-0.115959	0.041468	0.011828	-0.0104644	0.092767	-0.0171559	-0.0334805	0.132679	0.0186169	-0.0626694	0.000769125	0.149542	0.0541046	0.00268903	-0.142916	-0.0708073	-0.0336346	0.120944	0.0135267	-0.00555422	0.113354	-0.106907	0.065272	-0.0751886	0.038415	-0.0341938	0.0452644	-0.0180682	0.0742995	0.0345083	-0.0381722	-0.00750896	-0.09848	0.0261887	-0.0384492	-0.0361517	-0.0093702	-0.0140711	0.00644716	0.141669	0.00849455
K	0.146118	0.257826	-0.226037	-0.054968	-0.473977	-0.0656043	-0.225875	-0.00879816	0.0569975	0.0881227	-0.0601623	0.118336	-0.0585901	0.0512095	0.0876979	0.0448556	-0.0327235	0.118174	-0.0147326	0.0440769	0.0850481	0.0529601	0.0125159	0.0361386	-0.0237722	0.00535801	0.160557	-0.0754143	-0.166792	-0.0117811	-0.0467461	-0.096391	0.0987301	0.019248	-0.00652705	0.0689201	-0.0333998	0.105902	-0.0203813	0.0314521	-0.129897	-0.0116573	0.0107407	-0.0273862	0.0845367	-0.0256094	0.0427379	0.0265285	0.00810388
Na	0.134784	0.288492	-0.507006	-0.101861	0.00231407	0.305077	0.181543	0.121271	-0.107094	0.122278	0.0260427	-0.0644106	0.0790557	-0.101543	0.0152664	0.00222028	-0.143668	0.0271716	-0.0740373	0.119889	-0.036471	-0.0079933	-0.0560022	0.0944429	-0.0975015	0.170264	0.127363	0.0889559	-0.0663806	-0.0386692	0.0311555	0.0418128	0.111192	-0.013454	0.0603049	0.0608612	0.0136921	0.033428	-0.0213697	-0.0081837	-0.0688899	0.0832779	0.0393623	-0.0139677	0.130795	-0.0232526	0.0758987	0.00536567	-0.0771371
P2O5	-0.214374	-0.697536	0.303452	0.0745079	-0.131902	-0.231174	-0.15417	-0.125361	0.00199849	0.127474	0.0524365	0.0171773	-0.124611	-0.0352843	-0.0127882	0.00837547	-0.0814778	0.0972729	0.039123	-0.0802086	-0.0693989	-0.000143376	0.0465325	-0.0430625	0.00571687	-0.0416984	0.0593021	-0.0489694	-0.101937	0.0407114	-0.0412474	-0.000840317	-0.0288038	-0.0240752	-0.0398692	0.0389922	-0.115247	-0.0199448	0.00316015	0.07219	0.000402883	-0.0066957	0.00983967	0.0515207	-0.0151554	0.00169207	0.0667063	-0.0494901	-0.0269983
Sand	-0.388114	-0.266959	-0.0910282	-0.462381	0.0605474	-0.0313624	0.0266564	-0.0285537	0.0357928	-0.0604991	-0.186506	-0.0285178	0.101807	0.0310801	0.167509	-0.0810253	0.0976452	-0.0660031	-0.0286745	-0.0673416	0.0537985	-0.0685217	0.0897713	0.0109126	0.0462614	-0.0602192	-0.155466	0.0714921	0.0260281	0.0536151	0.04806	-0.00874839	0.0597147	-0.00411949	-0.0110045	0.0582438	-0.0298305	-0.0429614	0.0346339	-0.150988	0.0531595	-0.061109	-0.00811372	0.0242846	-0.00860744	0.133133	0.0297708	-0.0185851	0.0172255
Silt	0.304042	-0.00456361	0.160303	0.334203	-0.0711265	0.0318548	-0.240704	0.0597487	-0.0113945	0.126257	0.233341	-0.0210746	-0.200826	-0.0207085	-0.136137	0.0353499	-0.137098	0.150943	-0.0212742	0.0128693	-0.116836	0.0772004	-0.0604784	0.00017766	-0.0613675	0.00821895	0.175264	-0.106757	-0.0620284	-0.0297506	-0.0747135	0.0320394	-0.101892	-0.0764154	-0.0290417	-0.0995829	0.00224083	0.0400177	-0.0442474	0.170882	0.0156595	0.0251398	0.000202995	-0.00129154	-0.000769163	-0.136506	0.010234	-0.027329	-0.0148381
Clay	0.360515	0.469478	-0.00768981	0.458541	-0.0316813	0.0215799	0.203092	-0.0122229	-0.0505007	-0.0255474	0.0828195	0.0714911	0.0309292	-0.0326421	-0.150505	0.104415	-0.0278831	-0.0415532	0.0719708	0.103895	0.0274473	0.0392679	-0.0935942	-0.0191818	-0.0169265	0.0963159	0.088982	-0.013802	0.0189826	-0.0625006	-0.00622408	-0.01798	0.00165753	0.086379	0.0492604	0.00182525	0.049609	0.0333114	-0.0144299	0.0857293	-0.108777	0.0803259	0.0139147	-0.0409381	0.0157819	-0.0902769	-0.0624357	0.0606822	-0.0146074
P value	PCo1	PCo2	PCo3	PCo4	PCo5	PCo6	PCo7	PCo8	PCo9	PCo10	PCo11	PCo12	PCo13	PCo14	PCo15	PCo16	PCo17	PCo18	PCo19	PCo20	PCo21	PCo22	PCo23	PCo24	PCo25	PCo26	PCo27	PCo28	PCo29	PCo30	PCo31	PCo32	PCo33	PCo34	PCo35	PCo36	PCo37	PCo38	PCo39	PCo40	PCo41	PCo42	PCo43	PCo44	PCo45	PCo46	PCo47	PCo48	PCo49
Year	0	5.47539e-05	0	0.527666	0.224837	0.171884	0.0985472	0.0256217	0.326059	0.778818	0.984383	0.401092	0.317042	0.117118	0.911075	0.986183	0.209436	0.738762	0.464214	0.857076	0.955772	0.69788	0.762495	0.722282	0.913449	0.938425	0.31073	0.622311	0.163949	0.713886	0.541127	0.523631	0.836271	0.53433	0.878032	0.518588	0.898024	0.501237	0.543312	0.795521	0.905754	0.355445	0.969232	0.660567	0.966684	0.925233	0.441478	0.395942	0.790734
pH	5.47614e-06	0.490485	5.91235e-07	0.0087892	0.0257901	2.55649e-07	0.00191572	0.797314	0.87877	2.0373e-05	0.845087	0.00767456	0.239599	0.580101	0.548515	0.0370688	0.548006	0.162707	0.572622	0.733191	0.227831	0.316208	0.927443	0.519312	0.251772	0.710027	0.922359	0.43487	0.699411	0.0358432	0.156086	0.349381	0.0245046	0.120858	0.137706	0.169964	0.200827	0.739026	0.0729515	0.109371	0.928533	0.144562	0.794362	0.0560706	0.960078	0.0567497	0.0109615	0.726313	0.474999
SOM	3.22498e-12	3.94338e-05	2.16213e-07	0.560746	0.634878	6.96626e-08	0.0779003	0.00105598	0.314431	0.600248	0.237216	0.291341	0.98819	0.852786	0.425373	0.00925701	0.200957	0.525642	0.0593881	0.268044	0.128577	0.312978	0.544923	0.429822	0.984361	0.073983	0.0499346	0.562149	0.919387	0.688719	0.843312	0.662799	0.419155	0.018186	0.402434	0.191759	0.606823	0.669851	0.351645	0.332447	0.872406	0.346465	0.841179	0.572556	0.412314	0.34491	0.713588	0.650728	0.999378
TN	1.55209e-12	8.73013e-10	1.27482e-09	0.825784	0.789455	1.54532e-06	0.636936	0.0095463	0.198584	0.436039	0.109225	0.536112	0.892067	0.302268	0.724132	0.00614439	0.639389	0.449528	0.0944144	0.172556	0.138561	0.537181	0.381863	0.341634	0.863135	0.124913	0.297612	0.293162	0.593544	0.645976	0.910116	0.531016	0.647523	0.127711	0.615342	0.499109	0.352023	0.856812	0.334895	0.304005	0.300487	0.634386	0.989752	0.668546	0.572763	0.344379	0.769587	0.687374	0.556805
CEC	4.73265e-06	0.000355523	0.441565	9.62341e-13	7.65961e-05	0.107826	0.755616	0.652048	0.696494	0.473285	0.0173479	0.196133	0.775554	0.777978	0.0391811	0.0404687	0.200006	0.557579	0.470212	0.255648	0.682919	0.0891859	0.303138	0.845037	0.733969	0.0456613	0.00678139	0.810704	0.34462	0.0856957	0.783112	0.64744	0.567677	0.503153	0.511606	0.718213	0.567138	0.416182	0.852341	0.0539836	0.244282	0.0902199	0.705754	0.430738	0.336364	0.0560646	0.858406	0.590475	0.672663
Ca	0	5.28466e-14	0.339129	0.0534523	0.00242456	0.0617136	0.418279	0.893079	0.91477	0.00212764	0.179903	0.530298	0.418429	0.806654	0.446229	0.46287	0.168408	0.574534	0.701569	0.681346	0.538123	0.695753	0.399211	0.690155	0.372837	0.101602	0.00879797	0.725428	0.351232	0.866388	0.796598	0.715251	0.196497	0.893854	0.587859	0.340234	0.960993	0.189541	0.58778	0.662205	0.218705	0.569219	0.802961	0.785314	0.354924	0.975841	0.297935	0.64715	0.497922
Mg	4.00353e-08	1.03473e-12	0.178858	8.18804e-08	0.00176416	2.04395e-05	0.00529364	0.0090705	0.0660848	0.512278	0.851789	0.868711	0.141975	0.786385	0.596811	0.0352861	0.768689	0.321747	0.990307	0.0175261	0.392418	0.96612	0.0232619	0.262778	0.595122	0.0551833	0.830802	0.930089	0.072448	0.0903572	0.30202	0.234309	0.543843	0.589012	0.474396	0.775322	0.239903	0.585587	0.546394	0.905584	0.118915	0.679067	0.543485	0.567848	0.882334	0.824102	0.918886	0.024506	0.893261
K	0.0203141	3.43143e-05	0.000297681	0.384897	1.77636e-15	0.29956	0.000300744	0.88947	0.367566	0.163117	0.341523	0.0606845	0.35431	0.418276	0.165163	0.478401	0.605139	0.0610422	0.815976	0.486079	0.178359	0.402523	0.843277	0.567988	0.707252	0.932553	0.0106901	0.232903	0.00797346	0.85237	0.460037	0.126983	0.117977	0.761082	0.917884	0.275744	0.597696	0.0934442	0.747477	0.61924	0.0393473	0.853904	0.865277	0.66526	0.180994	0.685785	0.499435	0.675138	0.898143
Na	0.0324554	3.21973e-06	0	0.10671	0.970842	7.93078e-07	0.00383236	0.0545243	0.0897926	0.0525347	0.680757	0.308459	0.211048	0.107817	0.809435	0.972023	0.0225387	0.667726	0.24157	0.0573564	0.564431	0.899525	0.376004	0.134882	0.122643	0.00674412	0.0433823	0.15916	0.293866	0.541179	0.622551	0.508775	0.0781007	0.831698	0.340378	0.335934	0.828766	0.597386	0.735675	0.897145	0.275955	0.1876	0.533947	0.825374	0.0379953	0.713367	0.229908	0.932457	0.222372
P2O5	0.00061236	0	9.13261e-07	0.238584	0.036383	0.000214072	0.0142908	0.0468109	0.974817	0.0431993	0.407198	0.786125	0.0481534	0.577179	0.839912	0.894749	0.197352	0.123527	0.536438	0.204445	0.272414	0.998193	0.462092	0.49618	0.928047	0.509936	0.348482	0.438951	0.106449	0.520012	0.514527	0.98941	0.64906	0.703695	0.52869	0.537802	0.0677779	0.752708	0.960189	0.253548	0.994922	0.91577	0.876485	0.41545	0.810794	0.978677	0.291498	0.434095	0.66972
Sand	1.74295e-10	1.74709e-05	0.149631	9.32587e-15	0.338436	0.620241	0.673662	0.651907	0.5717	0.338822	0.00295783	0.652316	0.106899	0.623393	0.00770423	0.19986	0.12209	0.296626	0.650531	0.286917	0.395106	0.278535	0.155357	0.863142	0.464707	0.341066	0.0134842	0.258179	0.680926	0.396721	0.447508	0.890091	0.345133	0.948118	0.862001	0.357167	0.63743	0.497193	0.584223	0.0164527	0.400752	0.333966	0.89802	0.701241	0.891851	0.0346583	0.638104	0.769073	0.78554
Silt	8.67759e-07	0.942534	0.0108161	5.44765e-08	0.260627	0.614759	0.000113878	0.344858	0.857161	0.0452503	0.00018587	0.739193	0.00135118	0.743564	0.0307393	0.576471	0.0295687	0.0164857	0.736814	0.83891	0.0640492	0.221992	0.338988	0.997761	0.331922	0.896705	0.00527032	0.0908117	0.326731	0.638331	0.237287	0.612708	0.106606	0.226742	0.646358	0.11482	0.971765	0.527154	0.484392	0.00654395	0.804625	0.691249	0.997442	0.983724	0.990306	0.0302847	0.871576	0.665917	0.814682
Clay	3.77114e-09	3.10862e-15	0.903321	1.66533e-14	0.616687	0.733174	0.00118771	0.8469	0.424756	0.686506	0.190049	0.258185	0.625081	0.606038	0.0168048	0.0981647	0.659564	0.511412	0.254996	0.0998588	0.664559	0.534929	0.138439	0.761878	0.789174	0.127281	0.159037	0.827412	0.764278	0.323055	0.921683	0.776389	0.979112	0.171637	0.436233	0.976999	0.43299	0.598667	0.819693	0.174895	0.084833	0.203782	0.826026	0.517688	0.803129	0.153034	0.323558	0.337359	0.817513
Fungi
Correlation	PCo1	PCo2	PCo3	PCo4	PCo5	PCo6	PCo7	PCo8	PCo9	PCo10	PCo11	PCo12	PCo13	PCo14	PCo15	PCo16	PCo17	PCo18	PCo19	PCo20	PCo21	PCo22	PCo23	PCo24	PCo25	PCo26	PCo27	PCo28	PCo29	PCo30	PCo31	PCo32	PCo33	PCo34	PCo35	PCo36	PCo37	PCo38	PCo39	PCo40	PCo41	PCo42	PCo43	PCo44	PCo45	PCo46	PCo47	PCo48	PCo49
Year	0.997429	0.0048556	-0.00821613	-0.012645	-0.0256711	-0.00514743	0.0163936	-0.0211515	-0.000421612	-0.00916454	0.00407539	0.00645503	-0.02593	0.00989924	0.0189377	0.00428914	0.00501818	0.000246174	-0.0188522	-0.00454675	-0.00504986	-0.0198472	-0.00541962	-0.00274452	-0.00616091	-0.00408623	-0.000437769	-0.00304354	-5.93249e-05	0.00309469	0.00462429	0.0041846	0.00326436	-0.000853523	0.00304977	-0.00701194	0.00131057	-0.000298926	0.00247075	0.000241553	-0.000108093	0.000590374	-0.00580241	0.00192059	-0.000378967	-0.000458769	-0.000714974	-0.00446405	0.00365613
pH	0.133219	0.0670445	0.418404	0.38423	-0.0144606	-0.489842	0.0896694	0.262138	-0.120173	0.243546	-0.162455	-0.0326707	-0.0810564	-0.0362662	-0.152007	-0.0915582	-0.0223129	-0.17182	0.0308422	0.156308	0.0869164	-0.0697301	-0.00439223	-0.0390724	0.0145064	0.0257242	-0.0162854	-0.121494	-0.0499898	-0.060096	0.0269673	-0.00917655	0.0111194	0.0179613	0.00652379	0.00995049	0.0120095	-0.0224857	0.0169424	0.0302644	0.0346879	-0.10764	0.00338464	0.0305365	0.0376499	-0.0402744	0.0160219	0.00937281	2.44877e-05
SOM	-0.191315	0.0594776	-0.124813	0.158694	-0.172901	0.681008	0.0559072	-0.376209	0.100965	-0.103134	-0.00901214	-0.154913	0.0168711	-0.0714103	-0.0504935	-0.129306	0.218568	0.0379466	-0.169832	-0.111416	0.0235979	0.10389	-0.0108744	0.0873544	-0.0734708	-0.134203	0.0994762	0.00525547	-0.0108875	0.0680325	0.00794419	0.0743248	-0.03802	-0.0266907	-0.0388427	-0.0122048	0.0143985	-0.00135862	0.019028	-0.0183142	-0.0147647	0.0463779	0.010941	-0.00834831	-0.033013	0.0688127	0.0108822	-0.0056149	-0.0293869
TN	-0.0944814	0.122832	-0.213276	0.176416	-0.261084	0.524601	-0.0544549	-0.408536	0.135701	-0.149042	0.0389709	-0.175273	0.0371107	-0.0774035	-0.0469807	-0.137392	0.288705	0.0243	-0.162161	-0.093867	0.0690385	0.127581	-0.0128924	0.142429	-0.0808121	-0.180928	0.0885544	0.0164711	-0.0116114	0.0981054	0.00133986	0.069474	-0.0125486	-0.000823842	-0.0424721	-0.0112532	0.0152123	-0.00235864	0.0267117	-0.0364443	-0.0123781	0.0439694	-0.00522549	-0.0190344	-0.0337704	0.0681005	0.0166343	-0.0187933	-0.0243555
CEC	-0.158405	-0.24211	-0.238816	0.406185	0.064468	0.579675	0.210209	0.0179087	0.192201	-0.0277168	0.0212971	-0.137504	-0.0826251	-0.295228	0.067433	0.167249	0.189682	0.0684556	0.00868101	-0.0792016	-0.00400847	0.0597217	0.0079875	0.0852426	-0.0573548	-0.0714506	0.00877677	-0.0647852	0.024506	0.0474296	-0.0261148	0.0224172	-0.00685018	0.023396	-0.0535217	0.00904712	0.00424247	-0.0226243	0.00560577	-0.00426259	-0.0242717	0.0147825	-0.0267976	0.0202221	-0.0260208	0.0107118	0.0216258	0.00864648	-0.033933
Ca	-0.26606	-0.00989154	-0.153473	0.750619	-0.177168	0.223445	0.204425	-0.0191781	0.0754244	-0.127342	-0.101918	-0.0897678	-0.00903735	-0.202212	-0.133967	0.0533756	0.0427954	-0.0318446	-0.078509	-0.026395	0.0313297	0.0569488	0.0630068	0.0748529	-0.0201267	-0.00646328	0.0727912	-0.180774	-0.0615717	-0.0286176	-0.0178094	0.00469744	-0.000515431	0.024993	-0.0569346	0.00398247	-0.0123961	0.0045524	0.00902439	0.0294595	-0.0207449	-0.0180073	-0.0277775	0.0212487	-0.0107017	0.0129768	0.0232433	0.0240737	-0.0390324
Mg	-0.118429	-0.497693	-0.495714	0.454555	-0.180858	0.0774657	0.22115	-0.0531346	0.171931	-0.108424	-0.0476666	-0.0343581	-0.002621	-0.0877618	-0.0795152	0.090495	-0.0224575	-0.0549807	-0.0127459	0.0586603	0.13014	0.0973013	-0.0159959	-0.0375397	0.000733332	-0.0227709	0.0484372	-0.120974	-0.05884	0.0030565	0.00628957	-0.00429925	0.0342227	0.0441117	-0.0142187	-0.0306878	0.050206	0.0137822	0.00970861	0.0186251	0.00949352	-0.0626905	-0.0273841	0.0423647	0.00194744	-0.0373769	0.00238305	0.0139082	-0.0312754
K	-0.169664	-0.0435821	0.299294	0.620317	-0.0637387	0.193163	0.0800666	0.0885659	-0.125905	-0.0481409	0.109326	0.0615914	0.247329	-0.356849	0.0104358	0.23023	0.0711676	-0.0018978	-0.0694316	-0.00975895	0.205658	0.0947662	-0.0921483	0.0215446	0.0656608	0.0189183	0.0718645	-0.0709109	-0.0618146	-0.0399171	-0.0535924	0.0387929	-0.0827297	-0.000828412	0.0238584	0.00582451	-0.0192294	0.00714293	-0.0254212	0.0394959	-0.0451835	0.00685971	0.00315269	0.0751453	-0.000493608	0.0282768	-0.0171443	-0.0109587	-0.0439677
Na	-0.290962	-0.281098	0.0936851	0.38093	-0.294115	-0.135531	0.507372	0.192552	0.0252713	0.0414554	-0.0391698	-0.0707207	-0.0362281	0.0903922	-0.335791	0.215641	-0.0737888	-0.000232193	-0.0720009	0.033668	-0.0111527	-0.0506022	0.0106377	0.00535426	-0.0800705	0.075998	-0.0170113	-0.0323773	0.00862215	-0.0361973	-0.0441691	0.00643499	0.0325395	0.0433025	-0.0941221	0.0508347	-0.000982623	-0.00905116	0.0312239	0.00430732	0.0285195	-0.021237	-0.0442378	0.0120981	0.0266479	-0.0330586	0.0191314	0.0303097	-0.0278738
P2O5	0.0777884	0.299067	0.281337	-0.097262	0.705539	0.307471	-0.14126	0.0616125	-0.235287	0.120823	0.0644807	-0.0855122	-0.162195	0.00105957	0.131754	-0.0447934	-0.00876267	-0.118663	-0.0629348	0.0255087	-0.0278127	-0.0186812	-0.0634267	-0.067395	0.0818482	-0.0945027	0.0282152	0.00856054	-0.00879099	-0.00568121	0.0154456	0.0195926	0.00625377	-0.00559478	0.0213373	0.00614307	0.00193345	-0.0261818	0.035461	0.0126235	-0.0315302	-0.021247	-0.0165779	-0.00931887	0.0100363	0.0196716	0.0104537	0.00516764	0.0172201
Sand	0.189609	0.033618	0.544658	-0.403852	-0.0446112	-0.469421	-0.192428	-0.172633	-0.154073	0.0628569	-0.0330888	0.0671994	0.171109	0.261265	0.01185	-0.0504055	-0.0928449	-0.0586015	-0.0412284	0.0863802	0.00405194	-0.085287	-0.0143073	-0.067416	-0.00462166	0.00655903	-0.0125569	0.0890825	0.00446097	-0.0182498	0.0361312	0.0107954	-0.0158404	-0.0132275	0.0363462	-0.014486	0.018749	-0.00423363	0.00898656	-0.00663204	0.0229637	0.00255012	0.0073067	-0.0171586	0.0261276	0.000750605	-0.0195137	0.00297038	0.0282972
Silt	-0.132317	0.285443	-0.435083	0.420547	0.293442	0.356746	0.0792686	0.269137	0.00583091	-0.00722572	0.0743727	-0.126123	-0.218671	-0.214304	-0.00516541	0.125274	0.114974	0.0552696	0.121866	-0.0768189	0.0168629	0.072473	-0.0425817	0.0554971	0.0467899	0.0113046	-0.0213244	-0.0888576	0.0121081	0.0178067	-0.0372151	-0.0205814	0.0199396	0.0218657	-0.0294333	0.0404395	-0.0253104	-0.00361162	-0.00170156	0.01786	-0.0314956	-0.0114905	-0.0165839	0.0295437	-0.00904721	-0.00133055	0.00961263	-0.0195736	-0.0148611
Clay	-0.192937	-0.354398	-0.497212	0.26715	-0.2265	0.447431	0.252831	0.0215643	0.26218	-0.101937	-0.019486	0.0137447	-0.071223	-0.2327	-0.0152755	-0.0421001	0.0424583	0.04473	-0.0545448	-0.070753	-0.024533	0.0733547	0.069045	0.0598391	-0.0404536	-0.0231362	0.0439638	-0.0629789	-0.0203166	0.0133136	-0.0243258	0.00253971	0.00690832	0.000363051	-0.0327662	-0.0166984	-0.00640476	0.0111139	-0.0138809	-0.00696692	-0.007331	0.00747084	0.00446966	-0.000751813	-0.0361077	7.24375e-05	0.0240074	0.0151176	-0.0338583
P value	PCo1	PCo2	PCo3	PCo4	PCo5	PCo6	PCo7	PCo8	PCo9	PCo10	PCo11	PCo12	PCo13	PCo14	PCo15	PCo16	PCo17	PCo18	PCo19	PCo20	PCo21	PCo22	PCo23	PCo24	PCo25	PCo26	PCo27	PCo28	PCo29	PCo30	PCo31	PCo32	PCo33	PCo34	PCo35	PCo36	PCo37	PCo38	PCo39	PCo40	PCo41	PCo42	PCo43	PCo44	PCo45	PCo46	PCo47	PCo48	PCo49
Year	0	0.938864	0.89674	0.841682	0.685068	0.935198	0.795663	0.738275	0.994686	0.884898	0.948673	0.918787	0.682063	0.875743	0.764819	0.945985	0.936821	0.996897	0.76585	0.942746	0.936423	0.753879	0.931779	0.965421	0.922475	0.948537	0.994483	0.961657	0.999252	0.961013	0.941771	0.947299	0.958877	0.989243	0.961578	0.911807	0.983484	0.996233	0.968869	0.996956	0.998638	0.99256	0.926974	0.975798	0.995224	0.994218	0.990989	0.943786	0.953947
pH	0.034541	0.289054	4.22506e-12	2.73443e-10	0.819316	0	0.155829	2.50267e-05	0.0567658	9.38628e-05	0.00978732	0.605721	0.199687	0.566622	0.0157312	0.147265	0.724472	0.00625015	0.626055	0.0129822	0.168977	0.270127	0.944689	0.536966	0.818753	0.684452	0.796982	0.0540791	0.429462	0.342056	0.670078	0.884749	0.860575	0.776616	0.917925	0.875105	0.849541	0.722425	0.788981	0.632541	0.583636	0.0881584	0.957363	0.629483	0.551902	0.524505	0.800197	0.882301	0.999691
SOM	0.00228726	0.347055	0.0477883	0.0116465	0.00592623	0	0.376816	6.80257e-10	0.109844	0.102381	0.8868	0.0138237	0.789848	0.258725	0.424822	0.0402594	0.000474489	0.54877	0.00688726	0.0775009	0.709301	0.0998764	0.863616	0.166831	0.245201	0.0332164	0.115212	0.933841	0.863454	0.28199	0.900139	0.239742	0.547996	0.673265	0.539364	0.847125	0.820078	0.982879	0.763731	0.772345	0.815583	0.463583	0.862789	0.895088	0.601947	0.276495	0.863519	0.929327	0.642444
TN	0.134722	0.0514649	0.000654119	0.00497498	2.70477e-05	0	0.389356	1.47957e-11	0.0312839	0.0179111	0.538025	0.00526806	0.557615	0.220774	0.457786	0.0292173	3.16414e-06	0.701061	0.00992232	0.137288	0.274918	0.0430229	0.838626	0.0237414	0.20105	0.00395554	0.161058	0.794718	0.854472	0.120332	0.983115	0.271894	0.842872	0.989617	0.502109	0.858914	0.810096	0.970281	0.673024	0.564716	0.844981	0.487144	0.934217	0.763654	0.593635	0.281508	0.792731	0.76656	0.700411
CEC	0.011802	0.000103523	0.00012931	1.98246e-11	0.308027	0	0.000785187	0.777253	0.00217995	0.661468	0.73654	0.0290847	0.191094	1.84183e-06	0.286262	0.00780113	0.00249753	0.279001	0.890933	0.210204	0.949515	0.345076	0.899598	0.177365	0.364566	0.258456	0.889737	0.305648	0.698648	0.453495	0.679923	0.723236	0.913834	0.711677	0.397546	0.886363	0.946572	0.720785	0.929442	0.946319	0.701392	0.815365	0.672033	0.749384	0.681012	0.865636	0.732628	0.891364	0.591857
Ca	1.86924e-05	0.875839	0.0147418	0	0.00479015	0.000350557	0.00110027	0.761923	0.232841	0.0434172	0.106515	0.155374	0.886485	0.00124891	0.0335297	0.398837	0.498858	0.614871	0.214231	0.67668	0.620606	0.367976	0.319144	0.23641	0.750527	0.918683	0.249606	0.00398697	0.330312	0.651179	0.778455	0.940852	0.993504	0.692961	0.368096	0.949842	0.844758	0.942675	0.886647	0.641622	0.743128	0.776059	0.660772	0.737117	0.865761	0.837584	0.713476	0.703713	0.537383
Mg	0.0604822	0	0	2.9754e-14	0.00396975	0.220403	0.000404557	0.400973	0.00621631	0.0858527	0.45124	0.587222	0.966977	0.164854	0.208398	0.15204	0.722759	0.384787	0.840435	0.353733	0.0389778	0.123417	0.800515	0.553067	0.990758	0.719052	0.443948	0.0551241	0.352258	0.961494	0.920862	0.945858	0.588696	0.485734	0.822287	0.627785	0.427467	0.827656	0.878117	0.76859	0.880797	0.321584	0.665284	0.503192	0.97546	0.554791	0.969973	0.826106	0.621211
K	0.00694364	0.490991	1.30563e-06	0	0.313543	0.00206875	0.205251	0.161003	0.0458578	0.446744	0.0832627	0.330158	7.23131e-05	5.5527e-09	0.869067	0.000227578	0.260351	0.976085	0.272188	0.87749	0.0010247	0.133546	0.144664	0.733593	0.299144	0.765053	0.2557	0.262078	0.328405	0.528194	0.396922	0.539885	0.190532	0.98956	0.706239	0.926696	0.761305	0.910167	0.687973	0.532559	0.475187	0.913715	0.960283	0.234579	0.993779	0.655065	0.786527	0.86257	0.487161
Na	2.62775e-06	5.8477e-06	0.138054	3.9902e-10	2.02196e-06	0.0314979	0	0.00213881	0.689718	0.512408	0.535951	0.263364	0.567029	0.152508	4.66886e-08	0.000567231	0.243158	0.997074	0.254797	0.594756	0.860161	0.423825	0.866557	0.9326	0.205228	0.229297	0.788143	0.608964	0.891668	0.567359	0.485166	0.919038	0.607171	0.493779	0.136218	0.421696	0.987616	0.886313	0.621787	0.945756	0.652297	0.737256	0.484487	0.848445	0.67376	0.601446	0.762485	0.632032	0.65967
P2O5	0.218481	1.33113e-06	5.7378e-06	0.123569	0	6.43113e-07	0.0249259	0.329991	0.000163536	0.0554295	0.307931	0.175994	0.00990662	0.986647	0.0365958	0.479011	0.889913	0.0599713	0.319698	0.686955	0.66037	0.767913	0.315923	0.286534	0.195315	0.134634	0.655768	0.892437	0.88956	0.928495	0.807241	0.756936	0.921311	0.92958	0.736062	0.922699	0.975636	0.679147	0.575273	0.841948	0.61837	0.737137	0.793418	0.882974	0.874037	0.755987	0.868845	0.934944	0.785606
Sand	0.00250743	0.595303	0	2.64437e-11	0.480803	3.10862e-15	0.00215326	0.00600532	0.014353	0.320299	0.601113	0.287938	0.00647147	2.66908e-05	0.851516	0.42563	0.141639	0.354216	0.514721	0.171631	0.948968	0.177138	0.821199	0.286384	0.941804	0.917483	0.84277	0.158565	0.943824	0.773125	0.568067	0.864597	0.802414	0.834491	0.565765	0.819003	0.767095	0.946683	0.887119	0.916568	0.716774	0.967869	0.908116	0.786352	0.679774	0.99054	0.757885	0.962578	0.654831
Silt	0.0357943	4.12648e-06	4.61853e-13	3.20077e-12	2.13883e-06	5.61326e-09	0.209817	1.48188e-05	0.926616	0.90913	0.239439	0.0454801	0.000471507	0.000614956	0.934972	0.0469666	0.0684358	0.382291	0.0533401	0.224291	0.789948	0.251687	0.501005	0.380331	0.459616	0.858277	0.736215	0.159623	0.848321	0.778488	0.556506	0.745083	0.75277	0.729777	0.641919	0.522805	0.689262	0.954507	0.978558	0.777842	0.618755	0.855971	0.793344	0.64067	0.886362	0.983232	0.879313	0.757165	0.814401
Clay	0.00209436	7.17247e-09	0	1.72221e-05	0.000289047	8.28226e-14	4.91201e-05	0.733359	2.49493e-05	0.106447	0.758217	0.828119	0.259979	0.000193833	0.809323	0.505865	0.502248	0.479635	0.388573	0.263145	0.698333	0.24595	0.274873	0.344127	0.52266	0.714739	0.487199	0.319358	0.748252	0.833429	0.700759	0.968	0.913106	0.995424	0.604668	0.791949	0.919417	0.860643	0.826442	0.912371	0.907812	0.906061	0.943715	0.990525	0.56832	0.999087	0.704491	0.811256	0.592674
[truncated: 202 more columns]
