# Supplementary material for: Compositional Shift of Bacterial, Archaeal, and Fungal Communities Is Dependent on Trophic Lifestyles in Rice Paddy Soil
Source: Front Microbiol. 2021 Sep 1;12:719486. doi: 10.3389/fmicb.2021.719486 (PMC8440912; doi:10.3389/fmicb.2021.719486)
Supplement: Supplementary file 1 [file Data_Sheet_1.zip › Table 5.XLSX]

## Sheet: Content
Supplementary Table 5. Correlation between microbial relative abundances and soil physicochemical properties
Sheet	Content
Phylum	Correlation at the phylum level
Class	Correlation at the class level
Order	Correlation at the order level
Family	Correlation at the family level
Genus	Correlation at the genus level

## Sheet: Phylum
Bacteria	Ca	CEC	Clay	K	Mg	Na	P2O5	pH	Sand	Silt	SOM	TN
Acidobacteria	-0.3345***	-0.1991**	-0.355***	-0.3857***	-0.3029***	-0.3989***	0.3172***	0.0595	-0.0092	0.2721***	-0.2647***	-0.2066***
Actinobacteria	-0.3027***	-0.3985***	-0.3536***	-0.1172.	-0.5417***	-0.179**	0.3147***	0.0804	0.3996***	-0.2832***	0.045	0.0417
Armatimonadetes	-0.1613*	-0.0792	0.1012	-0.2681***	-0.1127.	-0.0453	-0.0289	-0.1416*	-0.1102.	0.0736	-0.0826	-0.105.
Atribacteria	0.1108.	0.0298	0.0629	0.0683	0.0962	-0.0386	-0.0575	0.0741	-0.0518	0.0445	0.009	0.0644
Bacteroidetes	0.2888***	0.0238	0.1071.	0.5269***	0.0279	0.1709**	0.1397*	0.2677***	0.0215	-0.1014	0.1498*	0.1694**
BRC1	0.1405*	0.2057**	0.2923***	0.1221.	0.1247*	-0.0422	-0.1173.	-0.2269***	-0.1802**	0.1331*	0.1532*	0.1461*
Calditrichaeota	-0.0931	-0.0356	-0.0262	0.0106	-0.0012	-0.0068	-0.0941	-0.0801	0.0897	-0.1012	-0.0438	-0.0509
Chlamydiae	-0.2131***	-0.0929	-0.2444***	-0.0394	-0.0879	-0.1436*	0.0653	0.0359	0.0952	0.1376*	-0.271***	-0.3042***
Chloroflexi	-0.0174	0.048	0.1289*	-0.1985**	0.248***	0.389***	-0.4514***	0.0554	-1e-04	-0.2113***	-0.1353*	-0.1718**
CK-2C2-2	-0.0508	-0.0729	-0.0508	-0.043	0.0378	0.0977	-0.0898	0.0406	0.082	-0.0833	-0.043	-0.0534
Cloacimonetes	0.1307*	0.1749**	0.1602*	0.1514*	-0.0323	-0.0685	0.0788	-0.2329***	-0.0088	-0.1017	0.4057***	0.4313***
Cyanobacteria	-0.3923***	-0.3527***	-0.4345***	-0.1962**	-0.3405***	-0.0441	0.0137	0.1502*	0.406***	-0.1754**	-0.3754***	-0.444***
Dadabacteria	0.2567***	0.1462*	0.2716***	-0.0575	0.2097***	0.1366*	-0.0641	0.0444	-0.2987***	0.3126***	0.0651	0.0378
Deinococcus-Thermus	0.1035	-0.0132	0.0315	0.0837	0.0097	-0.0049	0.0354	0.0178	-0.0304	0.0463	0.0582	0.046
Dependentiae	0.0406	0.1405*	-0.0288	0.0491	0.0605	0.019	0.1012	-0.025	-0.1472*	0.3423***	-0.0973	-0.1521*
Elusimicrobia	-0.3541***	-0.047	-0.2949***	-0.2297***	-0.2108***	-0.2318***	0.1179.	-0.1893**	0.0836	0.1473*	-0.146*	-0.2167***
Entotheonellaeota	-0.0868	-0.1062.	-0.0313	-0.1128.	-0.0672	6e-04	-0.0462	0.003	0.0351	-0.0228	-0.0833	-0.0743
Epsilonbacteraeota	0.1582*	0.1738**	0.2097***	0.2383***	0.331***	0.1881**	-0.3568***	-0.0392	-0.1061.	0.0932	-0.0623	-0.0647
FBP	-0.102	-0.029	0.0164	-0.1744**	-0.147*	-0.1171.	-0.0093	-0.1564*	0.0088	0.0566	0.0712	0.0511
FCPU426	0.0343	0.143*	0.133*	0.0128	0.0948	-0.0448	-0.0715	-0.2475***	-0.1767**	0.2062***	0.0515	-0.0421
Fibrobacteres	0.0877	0.0768	0.0834	0.0931	0.1249*	0.1098.	-0.1094.	0.0107	-0.0736	0.1401*	-0.0679	-0.1081.
Firestonebacteria	0.0313	0.1132.	0.1336*	-0.0689	0.0433	-0.06	-0.1062.	-0.2483***	-0.0591	0.0316	0.1578*	0.1143.
Firmicutes	-0.1785**	-0.2246***	-0.3596***	0.2379***	-0.4511***	-0.1494*	0.2478***	0.1791**	0.3905***	-0.2783***	-0.211***	-0.273***
Fusobacteria	0.013	0.0296	0.0897	0.0115	-0.0589	0.0366	0.0252	0.0214	-0.0261	-0.0156	0.0604	0.0704
GAL15	0.2592***	0.1218.	0.0408	0.2239***	0.1503*	0.175**	-0.0278	0.2253***	-0.132*	0.2373***	-0.1295*	-0.1476*
Gemmatimonadetes	-0.1912**	-0.1229.	-0.2259***	-0.0359	-0.3979***	-0.4462***	0.4681***	0.0098	0.0173	0.1507*	0.0233	0.0632
GN01	0.0586	-0.0247	0.0143	0.0404	0.0299	-0.0612	0.0169	0.0641	-0.0065	-0.0117	0.0404	0.0873
Halanaerobiaeota	0.0829	0.0703	-0.0062	0.225***	-0.0512	0.0871	0.1746**	0.1203.	-0.0143	-0.0066	-0.0046	-0.0443
Hydrogenedentes	0.2773***	0.2937***	0.3611***	0.1288*	0.31***	0.0693	-0.1611*	-0.1607*	-0.272***	0.1192.	0.2105***	0.1848**
Kiritimatiellaeota	0.1311*	0.1985**	-0.0297	0.2205***	0.059	-0.0577	0.0356	-0.1329*	-0.0065	0.0877	0.1171.	0.0505
Latescibacteria	0.4068***	0.1505*	0.218***	0.1139.	0.2676***	0.1783**	-0.0805	0.2228***	-0.2431***	0.2282***	-0.0202	-0.0396
LCP-89	0.0391	0.0538	0.1089.	0.0578	0.0882	0.023	-0.0742	-0.0882	-0.0579	0.0509	0.0579	0.0386
Lentisphaerae	0.1402*	0.1191.	0.1469*	0.2147***	0.2301***	0.0288	-0.1771**	-0.0542	-0.0739	0.0578	-0.0352	-0.0222
Margulisbacteria	-0.006	0.0479	0.0583	-0.0348	-0.0023	0.0146	-0.0268	-0.1532*	-0.0354	-0.0093	0.0989	0.0548
Modulibacteria	0.0722	0.0473	0.0699	0.041	0.0096	0.0137	-0.0792	-0.0226	0.0267	-0.0532	0.0699	0.0944
NA	-0.044	0.1188.	-0.0877	-0.0669	-0.1775**	-0.2383***	0.154*	-0.1724**	-0.0549	0.2428***	0.0461	-0.0415
Nitrospinae	-0.1464*	-0.0982	-0.2704***	-0.0303	-0.0708	0.1807**	-0.0576	0.33***	0.2064***	-0.0904	-0.3859***	-0.4398***
Nitrospirae	0.2021**	0.2986***	0.2014**	-0.1503*	0.5339***	0.4618***	-0.3482***	0.0439	-0.2629***	0.0872	-0.0446	-0.1004
Omnitrophicaeota	-0.1651**	0.0489	-0.2243***	-0.1027	-0.1087.	-0.3086***	0.1077.	-0.179**	0.0619	0.1216.	-0.045	-0.0811
Patescibacteria	-0.0716	0.1042.	-0.1228.	-0.0882	-0.1077.	-0.1512*	0.1541*	-0.1225.	-0.0981	0.3159***	-0.0991	-0.1091.
PAUC34f	-0.035	-0.004	-0.0185	0.1164.	0.0218	0.0043	-0.103	-0.0474	0.061	-0.0313	-0.102	-0.1369*
Planctomycetes	0.427***	0.5017***	0.5493***	0.0385	0.3499***	-0.0031	0.0408	-0.3632***	-0.6277***	0.5523***	0.4158***	0.3802***
Poribacteria	0.1323*	0.1014	0.1082.	0.0761	0.116.	0.0236	-0.0708	-0.015	-0.0691	0.0104	0.1013	0.1015
Proteobacteria	0.1953**	-0.0054	0.09	0.4371***	0.1636**	0.038	-0.085	-0.0288	0.0914	-0.108.	0.0808	0.121.
Rokubacteria	0.0817	-0.1044.	-0.0863	0.0071	0.0896	0.026	-0.038	0.2789***	-0.0185	0.0975	-0.2447***	-0.2211***
Schekmanbacteria	-0.064	-0.0353	-0.1814**	-0.018	-0.1229.	-0.078	0.149*	0.1036	0.0732	0.0521	-0.1055.	-0.1143.
Spirochaetes	0.4197***	0.4039***	0.3628***	0.3863***	0.4017***	0.1496*	-0.0737	-0.1734**	-0.3005***	0.2131***	0.2862***	0.2066***
TA06	0.2714***	0.4286***	0.4647***	0.2586***	0.436***	0.0126	-0.2748***	-0.3894***	-0.3096***	0.1152.	0.3385***	0.3585***
Tenericutes	0.1265*	0.091	0.0816	0.1514*	0.0806	0.0355	-0.0305	0.0035	-0.0337	0.0178	0.054	0.0656
uncultured	-0.0753	-0.0844	-0.0914	-0.1517*	-0.0926	0.0425	-0.0237	-0.0437	0.0979	-0.1354*	-0.0034	-0.0426
Verrucomicrobia	0.2556***	0.449***	0.5741***	-0.1951**	0.2998***	-0.1946**	-0.0815	-0.4617***	-0.6235***	0.5396***	0.3425***	0.3893***
WOR-1	0.2105***	0.2842***	0.2498***	0.1568*	0.3622***	0.1343*	-0.2697***	-0.1458*	-0.2232***	0.1604*	0.0156	-0.0368
WPS-2	-0.248***	-0.0839	-0.0923	-0.2295***	-0.2568***	-0.3023***	0.103	-0.2693***	0.0217	0.1376*	-0.0077	-0.0197
WS1	0.0152	0.0238	-0.0095	0.0889	-0.0231	0.0502	-0.0792	1e-04	0.0769	-0.0623	-0.085	-0.1204.
WS2	0.2811***	0.1279*	0.2421***	0.3656***	0.2436***	0.3464***	-0.1231.	0.2377***	-0.1214.	-0.0153	-0.046	-0.058
WS4	0.1304*	0.0985	0.1455*	0.0713	-0.0021	0.1149.	-0.0327	0.0435	-0.0763	0.0046	0.0215	-0.0115
Zixibacteria	0.4783***	0.5113***	0.6188***	0.3095***	0.4867***	0.2287***	-0.2478***	-0.1472*	-0.5311***	0.3513***	0.1653**	0.1326*
Fungi	Ca	CEC	Clay	K	Mg	Na	P2O5	pH	Sand	Silt	SOM	TN
Ascomycota	-0.138.	-0.3137***	-0.1132	0.0137	-0.149.	0.0364	-0.0046	0.1295	0.2201**	-0.2807***	-0.0114	-0.0509
Basidiomycota	-0.2255**	-0.1018	-0.4254***	0.1015	-0.3214***	0.0528	0.2184**	0.1839*	0.4416***	-0.3303***	-0.0868	-0.0661
Blastocladiomycota	0.1288	0.0671	-0.0046	0.1551*	-0.0033	0.0854	0.04	0.0902	0.0123	0.0059	0.0296	0.003
Cercozoa	0.1932*	-0.0398	-0.2347**	0.3155***	-0.0811	0.037	0.3047***	0.278***	0.0946	0.0184	0.0695	0.0378
Chytridiomycota	-0.0791	0.0274	0.269***	0.0158	0.2626***	0.0542	-0.3696***	-0.1723*	-0.0838	-0.0963	-0.0128	0.0379
Entomophthoromycota	0.0119	0.0069	0.0898	-0.0539	0.0582	-0.1003	0.0449	-0.086	-0.0849	0.0917	0.1499.	0.1748*
Glomeromycota	-0.326***	-0.362***	0.0763	-0.2153**	-0.1381.	-0.2724***	-0.279***	-0.2068**	0.0154	0.0468	-0.3377***	-0.2604***
Monoblepharomycota	-0.0035	-0.0742	-0.0746	0.0762	0.0129	0.0032	-0.021	0.0351	0.1275	-0.1453.	0.094	0.1117
Mortierellomycota	0.1645*	0.2539**	0.3005***	0.0046	0.2932***	-0.2066**	0.0251	-0.2826***	-0.4875***	0.4457***	0.0839	0.0566
Mucoromycota	-0.0141	-0.0671	-0.0191	0.0469	0.1368.	0.1008	-0.2597***	0.0467	0.1421.	-0.1766*	-0.1098	-0.0412
NA	0.2868***	0.2295**	0.301***	0.0564	0.3535***	0.0216	-0.1747*	-0.02	-0.3005***	0.2392**	0.1101	0.1213
Olpidiomycota	0.403***	0.2815***	0.4363***	0.0147	0.4431***	0.2354**	0.0549	0.0528	-0.6195***	0.5971***	0.1007	0.0978
Rozellomycota	0.2317**	0.1712*	0.2316**	0.1359.	0.2951***	-0.2197**	-0.0727	-0.1643*	-0.3792***	0.464***	-0.0063	-0.0014
unidentified	0.2511**	0.3147***	0.2536**	0.2446**	0.2419**	-0.2075**	-0.036	-0.1073	-0.2915***	0.324***	0.1124	0.1419.
Zoopagomycota	-0.1625*	-0.085	-0.4466***	0.1518.	-0.388***	-0.2696***	0.5849***	-0.0155	0.1812*	0.0614	-0.0151	-0.1133
Archaea	Ca	CEC	Clay	K	Mg	Na	P2O5	pH	Sand	Silt	SOM	TN
Altiarchaeota	0.0529	0.0949	-0.0262	0.2623***	-0.0234	-0.092	0.1287*	-0.0458	0.0026	0.0501	0.0746	0.0256
Asgardaeota	0.4103***	0.3974***	0.4288***	0.2533***	0.415***	0.2364***	-0.2398***	-0.1163.	-0.335***	0.1718**	0.2064***	0.1535*
Crenarchaeota	0.4529***	0.5193***	0.4909***	0.412***	0.4251***	0.0578	-0.0651	-0.3205***	-0.3565***	0.0706	0.5468***	0.5469***
Diapherotrites	0.162**	0.1899**	0.2205***	0.0406	0.2188***	0.0924	-0.2195***	-0.1566*	-0.2113***	0.2233***	0.0358	-0.0127
Euryarchaeota	-0.3023***	-0.1694**	-0.5248***	0.3072***	-0.5009***	-0.4823***	0.394***	0.0772	0.4675***	-0.2093***	-0.0471	0.0015
Hadesarchaeaeota	-0.1072.	-0.1254*	-0.0684	-0.0645	-0.0907	-0.0677	-0.0985	-0.0017	0.1526*	-0.1712**	-0.0835	-0.0827
NA	0.2322***	0.2984***	0.3299***	0.0881	0.2957***	-0.006	-0.1587*	-0.1972**	-0.2571***	0.179**	0.2008**	0.2309***
Nanoarchaeaeota	0.1952**	0.2409***	0.1875**	0.1155.	0.1491*	0.1815**	-0.1328*	-0.1963**	-0.1193.	0.0857	0.1834**	0.0435
Thaumarchaeota	-0.0544	0.1777**	0.1132.	-0.3634***	0.0573	-0.0694	0.0609	-0.2525***	-0.352***	0.4041***	-0.0605	-0.1469*

## Sheet: Class
Bacteria	Ca	CEC	Clay	K	Mg	Na	P2O5	pH	Sand	Silt	SOM	TN
Acidobacteria_Acidobacteriia	-0.4603***	-0.1609*	-0.3027***	-0.4583***	-0.2997***	-0.4247***	0.2794***	-0.1979**	-0.0111	0.2395***	-0.1627**	-0.1423*
Acidobacteria_Aminicenantia	0.4546***	0.4852***	0.5005***	0.4179***	0.4761***	0.1039.	-0.2058**	-0.2171***	-0.2986***	0.0101	0.3927***	0.4077***
Acidobacteria_AT-s3-28	0.0183	-0.02	-0.0393	-0.1163.	-0.03	0.059	-0.0346	0.0683	-0.0506	0.1745**	-0.1358*	-0.1585*
Acidobacteria_Blastocatellia (Subgroup 4)	0.131*	-0.2404***	-0.0383	0.1521*	-0.225***	-0.0381	0.1993**	0.3168***	0.0897	-0.0145	-0.0408	0.0503
Acidobacteria_c5LKS83	0.1629**	0.1696**	0.1945**	0.1324*	0.112.	0.0197	-0.0717	-0.1685**	-0.093	0.0159	0.2426***	0.2441***
Acidobacteria_Fischerbacteria	-0.0612	-0.0404	-0.0964	0.043	-0.1055.	-0.1081.	0.0951	0.0641	0.0456	0.0195	-0.0378	-0.0143
Acidobacteria_Holophagae	-0.3449***	-0.1968**	-0.2861***	-0.3954***	-0.1	-0.1918**	-0.0305	0.0547	0.1132.	-0.0251	-0.3095***	-0.2469***
Acidobacteria_NA	-0.005	0.0291	-0.039	0.0174	-0.093	-0.0341	0.0797	-0.0463	0.0058	0.0059	0.0152	-0.0167
Acidobacteria_Subgroup 11	-0.1125.	-0.2598***	-0.3856***	-0.1069.	-0.0807	0.0608	-0.03	0.3288***	0.3056***	-0.1186.	-0.3269***	-0.3318***
Acidobacteria_Subgroup 15	0.1262*	0.1559*	0.0142	0.0139	-0.0054	0.0104	0.1603*	0.0263	-0.1516*	0.2004**	0.038	0.0018
Acidobacteria_Subgroup 17	-0.1435*	-0.2559***	-0.3652***	-0.0431	-0.0604	0.0664	-0.0652	0.3699***	0.2958***	-0.1481*	-0.3707***	-0.3738***
Acidobacteria_Subgroup 18	0.3291***	0.1931**	0.2693***	0.1836**	0.4064***	0.1654**	-0.2451***	-0.1091.	-0.1352*	-0.0965	0.2402***	0.2318***
Acidobacteria_Subgroup 19	-0.0242	-0.0421	-0.0294	0.0354	0.0239	-0.0101	-0.0321	0.0143	0.0644	-0.0217	-0.047	-0.033
Acidobacteria_Subgroup 20	0.0416	-0.0339	-0.0835	0.0191	-0.0195	0.1072.	0.0512	0.1816**	-0.0216	0.0904	-0.152*	-0.1766**
Acidobacteria_Subgroup 21	0.1763**	0.041	0.177**	0.3135***	0.0444	0.1607*	0.0245	0.1863**	-0.0946	0.0187	-0.0375	-0.0241
Acidobacteria_Subgroup 22	0.4009***	0.2508***	0.3728***	0.1317*	0.4285***	0.2425***	-0.2438***	0.092	-0.391***	0.3368***	-0.0292	-0.053
Acidobacteria_Subgroup 25	0.3476***	0.1721**	0.2931***	-0.0953	0.2292***	0.1595*	-0.1134.	-0.0103	-0.3423***	0.3267***	0.103	0.0856
Acidobacteria_Subgroup 5	0.0126	-0.0196	-0.1025	0.0685	-0.1133.	-0.1257*	0.2618***	0.1082.	-0.0407	0.1559*	-0.0305	-0.0472
Acidobacteria_Subgroup 6	0.1789**	-0.23***	-0.1695**	0.1925**	-0.0804	0.0263	0.1137.	0.548***	0.0872	-0.0115	-0.2461***	-0.1699**
Acidobacteria_Thermoanaerobaculia	-0.1973**	-0.1987**	-0.2831***	-0.1753**	-0.2111***	-0.113.	0.1159.	0.0883	0.155*	0.1377*	-0.2465***	-0.2728***
Actinobacteria_0319-7L14	-0.1037	-0.0345	0.0455	-0.1244*	-0.0852	-0.1202.	-0.0686	-0.2066***	-0.0539	0.1186.	-0.019	-0.0183
Actinobacteria_Acidimicrobiia	-0.4562***	-0.3524***	-0.489***	-0.1851**	-0.3915***	-0.2727***	0.1718**	-0.1091.	0.3689***	-0.0923	-0.1486*	-0.1108.
Actinobacteria_Actinobacteria	-0.1852**	-0.3442***	-0.2335***	-0.0241	-0.41***	-0.0487	0.2001**	0.0888	0.373***	-0.3564***	0.1007	0.0751
Actinobacteria_Coriobacteriia	-0.0527	0.0683	-0.2026**	0.2955***	-0.1934**	-0.2305***	0.2027**	0.0139	0.1684**	-0.0572	0.0626	0.1082.
Actinobacteria_FFCH16263	0.0654	0.0668	0.0729	0.0334	0.1528*	0.0804	-0.1657**	-0.037	-0.0407	-0.0065	0.0017	0.0022
Actinobacteria_KIST-JJY010	0.0738	0.0796	0.1291*	-0.0137	0.0904	0.0146	-0.0855	-0.0631	-0.1261*	0.126*	0.0428	0.052
Actinobacteria_MB-A2-108	-0.1928**	-0.5971***	-0.4741***	-0.0184	-0.3904***	0.078	0.0663	0.6732***	0.4781***	-0.3456***	-0.5255***	-0.4562***
Actinobacteria_NA	-0.2251***	-0.0393	-0.249***	-0.1679**	-0.3184***	-0.2689***	0.2968***	-0.0271	0.0349	0.1291*	-0.0962	-0.1223.
Actinobacteria_RBG-16-55-12	0.0171	0.0273	-0.0976	0.0709	-0.0614	-0.0274	0.1162.	0.1129.	0.0411	0.0439	-0.0271	-0.044
Actinobacteria_Thermoleophilia	-0.425***	-0.2783***	-0.3568***	-0.4625***	-0.5227***	-0.4492***	0.3716***	-0.1707**	0.1346*	0.1232.	-3e-04	0.021
Actinobacteria_WCHB1-81	0.1617*	0.0953	0.0946	0.163**	0.0836	0.1051.	-0.0302	0.0292	-0.0396	0.0153	0.056	0.0273
Armatimonadetes_Armatimonadia	-0.1383*	-0.162*	-0.001	-0.1103.	-0.1309*	0.0284	-0.0869	-0.0302	0.1138.	-0.1403*	-0.085	-0.1068.
Armatimonadetes_Chthonomonadetes	-0.1457*	-0.0629	0.1142.	-0.2651***	-0.0238	-3e-04	-0.1345*	-0.1686**	-0.0911	0.0286	-0.0665	-0.0694
Armatimonadetes_DG-56	0.3387***	0.2942***	0.3407***	0.0877	0.2955***	0.1281*	-0.0568	-0.0573	-0.3433***	0.2404***	0.2039**	0.1741**
Armatimonadetes_Fimbriimonadia	-0.179**	-0.1868**	-0.0123	-0.2096***	-0.1719**	-0.0621	0.0628	0.0347	-0.052	0.1112.	-0.176**	-0.1698**
Armatimonadetes_NA	0.0384	0.0384	0.0046	0.14*	0.0262	0.0722	0.0413	0.102	-0.061	0.079	-0.0923	-0.1142.
Armatimonadetes_uncultured	-0.1025	-0.0363	-0.0837	-0.0926	-0.2192***	-0.0698	0.148*	-0.0608	0.0845	-0.086	0.0086	-0.0554
Armatimonadetes_uncultured bacterium	-0.2386***	-0.1632**	-0.1302*	-0.1861**	-0.163**	-0.0742	0.0123	-0.0468	0.135*	-0.0931	-0.1306*	-0.1156.
Atribacteria_JS1	0.1108.	0.0298	0.0629	0.0683	0.0962	-0.0386	-0.0575	0.0741	-0.0518	0.0445	0.009	0.0644
Bacteroidetes_Bacteroidia	0.3037***	0.0285	0.1284*	0.505***	0.0177	0.176**	0.1545*	0.2115***	4e-04	-0.0791	0.1993**	0.2074***
Bacteroidetes_Ignavibacteria	-0.1673**	-0.072	-0.1931**	-0.0134	-0.0272	-0.1158.	-0.0354	0.2025**	0.1111.	-0.024	-0.261***	-0.1792**
Bacteroidetes_Rhodothermia	0.1055.	0.0742	-0.0039	0.0977	0.056	0.1055.	0.0247	0.1034	-0.0508	0.1055.	-0.0534	-0.0821
BRC1_metagenome	0.1576*	0.1209.	0.1769**	0.054	0.1629**	0.0798	-0.1477*	-0.0525	-0.1118.	0.031	0.0694	0.0655
BRC1_NA	0.1024	0.0987	0.1541*	-0.005	0.1038	0.0653	-0.0385	-0.1485*	-0.0788	0.0375	0.1911**	0.1859**
BRC1_Omnitrophica bacterium OLB16	-0.0405	-0.0342	0.0134	-0.0116	-0.0966	-0.0455	0.0277	0.0145	0.0045	0.0176	0.0045	0.0053
BRC1_soil bacterium WWH121	-0.0716	0.0326	-0.0586	-0.0716	-0.1003	-0.0794	0.0898	-0.0916	-0.0143	0.0664	-0.0039	-0.0195
BRC1_uncultured bacterium	0.0091	0.0027	-0.0137	0.0961	0.0116	-0.0164	-0.0162	0.0239	0.0433	-0.0486	0.0071	0.0053
BRC1_uncultured candidate division BRC1 bacterium	0.0824	0.1236.	0.1108.	0.0456	0.0685	0.0096	0.0581	-0.0394	-0.0692	-0.0046	0.1553*	0.1706**
BRC1_uncultured deep-sea bacterium	0.0463	-0.0645	-0.0039	0.015	-0.0146	0.0813	0.0206	0.1085.	-0.0259	0.0205	-0.0561	-0.0737
BRC1_uncultured delta proteobacterium	0.0708	0.1241*	0.0551	-0.0402	0.0694	0.1051.	-0.0148	-0.0299	-0.0784	0.0378	0.0539	-0.0062
BRC1_uncultured organism	-0.1718**	-0.1026	-0.1915**	-0.1094.	-0.192**	-0.1437*	0.0956	-0.0196	0.1391*	-0.0841	-0.0739	-0.085
BRC1_uncultured soil bacterium	-0.0645	-0.0355	0.0037	0.0172	-0.1151.	-0.0518	-0.0365	-0.0965	0.0515	-0.0321	0.0017	-0.0361
BRC1_uncultured soil bacterium PBS-74	0.0472	0.0633	0.1005	0.0601	-0.0096	0.0286	-0.0424	-0.0184	-0.0807	0.0672	0.0295	0.0417
BRC1_uncultured soil bacterium PBS-II-1	0.0203	0.1087.	0.1163.	0.0894	0.1092.	0.0049	-0.1124.	-0.146*	-0.0705	0.0489	-0.0346	-0.0314
BRC1_uncultured soil bacterium PBS-II-34	0.0679	0.1235.	0.1345*	0.0442	0.0541	-0.0354	-0.0162	-0.1171.	-0.1346*	0.1263*	0.1237*	0.1208.
BRC1_uncultured soil bacterium PBS-II-4	-0.0038	0.0265	-0.003	0.0095	-0.0554	-0.1057.	0.0799	-0.0574	-0.0405	0.0778	0.076	0.0756
BRC1_uncultured soil bacterium PBS-III-18	0.0585	0.1006	0.0611	-0.042	0.0448	0.0506	0.0639	-0.0661	-0.0866	0.0483	0.1053.	0.0537
BRC1_uncultured soil bacterium PBS-III-24	-0.0247	-0.0195	0.0586	-0.0898	-0.0273	-0.0404	-0.0534	-0.0916	-0.0586	0.0898	0.0195	0.0274
BRC1_uncultured soil bacterium PBS-III-29	0.0722	0.0493	0.0916	0.0064	0.0708	0.0609	0.0541	0.0113	-0.1075.	0.1022	-0.0081	-0.0258
BRC1_uncultured soil bacterium PBS-III-4	0.0256	-0.0521	0.0567	0.1096.	0.0556	0.0081	-0.1378*	0.0878	0.0301	-0.0424	-0.1308*	-0.0891
BRC1_uncultured soil bacterium PRR-11	-0.0601	-0.0298	-0.0767	0.0147	-0.1667**	-0.154*	0.0699	-0.0362	0.1317*	-0.1044.	0.0731	0.0707
Calditrichaeota_Calditrichia	-0.0931	-0.0356	-0.0262	0.0106	-0.0012	-0.0068	-0.0941	-0.0801	0.0897	-0.1012	-0.0438	-0.0509
Chlamydiae_Chlamydiae	-0.215***	-0.0954	-0.2466***	-0.0394	-0.089	-0.1437*	0.0656	0.0368	0.097	0.1361*	-0.273***	-0.3064***
Chlamydiae_LD1-PA32	0.078	0.1289*	0.1224.	-0.0188	0.0902	0.0157	-0.0704	-0.0304	-0.0974	0.1031	0.0475	0.0565
Chloroflexi_AD3	-0.3082***	0.0935	-0.1354*	-0.4311***	-0.1763**	-0.2681***	0.2654***	-0.3898***	-0.1655**	0.3181***	0.0566	-0.0523
Chloroflexi_Anaerolineae	0.1909**	0.1577*	0.3019***	0.0711	0.4489***	0.5097***	-0.5903***	0.0517	-0.0139	-0.3105***	-0.0137	-0.0305
Chloroflexi_Chloroflexia	-0.1462*	-0.4077***	-0.2391***	-0.0395	-0.3206***	0.0822	0.1108.	0.4821***	0.248***	-0.1353*	-0.373***	-0.3557***
Chloroflexi_Dehalococcoidia	0.0713	-0.0103	-0.1214.	-0.0528	-0.1046.	-0.2008**	0.2054**	0.0102	0.0083	0.1156.	0.1517*	0.1756**
Chloroflexi_Gitt-GS-136	-0.197**	-0.4363***	-0.3878***	0.036	-0.2217***	0.1527*	0.0107	0.6602***	0.3572***	-0.2983***	-0.5622***	-0.5138***
Chloroflexi_JG30-KF-CM66	0.0237	0.1049.	0.0546	-0.1309*	0.2385***	0.3042***	-0.1698**	0.0653	-0.1673**	0.0799	-0.2053**	-0.3478***
Chloroflexi_KD4-96	-0.3163***	-0.3568***	-0.3802***	-0.1825**	-0.1156.	-0.0272	-0.1048.	0.2095***	0.382***	-0.3192***	-0.2647***	-0.1928**
Chloroflexi_Ktedonobacteria	0.0321	0.3043***	0.3659***	-0.2449***	0.1339*	-0.0742	0.086	-0.4395***	-0.4949***	0.4234***	0.253***	0.1683**
Chloroflexi_NA	0.005	0.0167	0.08	-0.1016	0.0357	0.0492	-0.0828	-0.064	-0.0619	0.052	0.0204	-0.0037
Chloroflexi_NLS2-31	0.0688	-0.0933	0.0656	0.0756	0.0609	0.1116.	-0.1971**	0.1383*	0.1091.	-0.2252***	0.0325	0.0774
Chloroflexi_OLB14	-0.0717	-0.2165***	0.064	-0.0874	0.2721***	0.331***	-0.4273***	0.0807	0.1568*	-0.2888***	-0.1265*	-0.0766
Chloroflexi_P2-11E	0.0209	0.0644	0.0286	-0.0376	-0.0354	-0.021	0.0775	-0.053	-0.0181	-0.0493	0.1271*	0.0921
Chloroflexi_SHA-26	-0.0269	0.0507	0.0884	-0.0407	-0.0103	-0.0646	-0.1113.	-0.1761**	-0.0375	-0.0505	0.0547	0.0583
Chloroflexi_TK10	0.1955**	0.1715**	0.16*	-0.0585	-0.0371	0.0094	0.316***	0.1111.	-0.4101***	0.4904***	-0.0057	-0.0864
CK-2C2-2_uncultured organism	-0.0508	-0.0729	-0.0508	-0.043	0.0378	0.0977	-0.0898	0.0406	0.082	-0.0833	-0.043	-0.0534
Cloacimonetes_Cloacimonadia	0.1307*	0.1749**	0.1602*	0.1514*	-0.0323	-0.0685	0.0788	-0.2329***	-0.0088	-0.1017	0.4057***	0.4313***
Cyanobacteria_Melainabacteria	-0.2163***	-0.0673	-0.1594*	-0.0503	-0.2653***	-0.0907	0.166**	-0.1529*	0.1514*	-0.0095	-0.0161	-0.0872
Cyanobacteria_Oxyphotobacteria	-0.2555***	-0.3125***	-0.2986***	-0.1037	-0.1213.	0.1224.	-0.2106***	0.281***	0.3699***	-0.2721***	-0.4031***	-0.4479***
Cyanobacteria_Sericytochromatia	-0.3311***	-0.2808***	-0.3925***	-0.2338***	-0.4004***	-0.1884**	0.2652***	-0.0427	0.2367***	0.0385	-0.1649**	-0.2274***
Dadabacteria_Dadabacteriia	0.2567***	0.1462*	0.2716***	-0.0575	0.2097***	0.1366*	-0.0641	0.0444	-0.2987***	0.3126***	0.0651	0.0378
Deinococcus-Thermus_Deinococci	0.1035	-0.0132	0.0315	0.0837	0.0097	-0.0049	0.0354	0.0178	-0.0304	0.0463	0.0582	0.046
Dependentiae_Babeliae	0.0406	0.1405*	-0.0288	0.0491	0.0605	0.019	0.1012	-0.025	-0.1472*	0.3423***	-0.0973	-0.1521*
Elusimicrobia_Elusimicrobia	-0.475***	-0.2718***	-0.483***	-0.2342***	-0.3761***	-0.2698***	0.1371*	-0.0222	0.3402***	-0.0804	-0.3018***	-0.3347***
Elusimicrobia_Endomicrobia	0.1432*	0.3004***	0.1826**	0.1736**	0.1284*	0.082	0.0317	-0.1589*	-0.1769**	0.1163.	0.201**	0.115.
Elusimicrobia_Lineage IIa	-0.3537***	-0.1277*	-0.3569***	-0.2224***	-0.2932***	-0.3151***	0.2237***	-0.1212.	0.0906	0.1808**	-0.1927**	-0.2144***
Elusimicrobia_Lineage IIb	-0.0375	0.0988	0.0913	-0.1731**	0.0925	0.0468	-0.0501	-0.1617*	-0.1669**	0.1729**	0.0572	0.0293
Elusimicrobia_Lineage IIc	0.0268	0.0862	0.0672	0.033	0.0433	-0.0967	-0.0046	-0.1727**	-0.0977	0.1175.	0.0703	0.0289
Elusimicrobia_NA	-0.0495	0.0162	-0.0387	-0.0154	-0.0219	-0.0123	0.0138	-0.047	0.0144	-0.002	0.0281	0.0073
Elusimicrobia_Rs-M47	-0.0313	-0.0034	-0.0053	-0.0238	-0.0682	-0.0202	0.0444	-0.0472	0.046	-0.0609	0.0776	0.1182.
Elusimicrobia_uncultured bacterium	0.0299	0.0586	0.0664	-0.0195	0.069	0.0195	-0.0716	-0.0353	-0.043	0.0352	0.0117	0.0195
Entotheonellaeota_Entotheonellia	-0.0868	-0.1062.	-0.0313	-0.1128.	-0.0672	6e-04	-0.0462	0.003	0.0351	-0.0228	-0.0833	-0.0743
Epsilonbacteraeota_Campylobacteria	0.1582*	0.1738**	0.2097***	0.2383***	0.331***	0.1881**	-0.3568***	-0.0392	-0.1061.	0.0932	-0.0623	-0.0647
FBP_metagenome	-0.0074	-0.0203	0.0198	-0.0455	-0.0154	0.013	-0.0286	-0.0153	0.0025	-0.0145	0.0257	-0.0015
FBP_NA	-0.1344*	-0.0625	-0.0992	-0.0369	-0.1441*	-0.1006	0.0741	-0.0333	0.0733	-0.0102	-0.0562	-0.0633
FBP_uncultured actinobacterium	0.1055.	0.0742	-0.0039	0.0977	0.056	0.1055.	0.0247	0.1034	-0.0508	0.1055.	-0.0534	-0.0821
FBP_uncultured bacterium	0.0768	0.043	0.043	0.1055.	0.0169	0.0872	0.056	0.0641	-0.0273	-0.0247	0.0299	0.0117
FBP_uncultured soil bacterium	-0.063	-0.0065	0.0706	-0.1853**	-0.0948	-0.1098.	-0.0579	-0.1864**	-0.0172	0.0504	0.118.	0.1178.
FCPU426_metagenome	-0.11.	-0.0875	0.0117	0.0167	0.0173	-0.0521	-0.1966**	-0.1552*	0.0305	0.0215	-0.1708**	-0.1785**
FCPU426_NA	-0.0022	0.0355	-0.016	-0.0113	0.0245	0.0724	0.0037	-0.0205	-0.033	0.0413	-0.0209	-0.0771
FCPU426_uncultured bacterium	-0.016	0.1197.	0.0798	0.0095	0.0364	-0.1073.	0.0035	-0.241***	-0.1417*	0.195**	0.0457	-0.0329
FCPU426_uncultured microorganism	0.1526*	0.1382*	0.1567*	0.1383*	0.1767**	0.0327	-0.0924	-0.0411	-0.1045.	0.0534	0.0723	0.084
FCPU426_uncultured Syntrophaceae bacterium	0.0423	0.0247	0.0712	-0.0155	-0.0013	0.0441	-0.0872	0.005	0.0085	-0.0623	0.0427	0.0335
Fibrobacteres_Chitinivibrionia	0.1763**	0.2975***	0.1096.	0.1003	0.1395*	-0.0026	0.0394	0.0388	-0.2125***	0.2634***	0.0403	0.037
Fibrobacteres_Fibrobacteria	-0.0193	-0.1171.	0.0067	0.0657	0.052	0.1315*	-0.1687**	-0.0147	0.0871	-0.0306	-0.1186.	-0.1644**
Firestonebacteria_Candidatus Firestonebacteria bacterium RIFOXYD2_FULL_39_29	0.0395	0.0635	0.014	0.0408	0.0033	-0.0614	0.0191	-0.0345	-0.0296	0.0511	0.038	0.0515
Firestonebacteria_NA	0.0221	0.0013	0.0195	0.0247	-0.0534	-0.0482	-0.0326	-0.0589	0.0612	-0.0664	0.0898	0.0795
Firestonebacteria_uncultured bacterium	0.0125	0.0957	0.1335*	-0.0952	0.0576	-0.0298	-0.1143.	-0.2411***	-0.0644	0.0271	0.1356*	0.0857
Firmicutes_Bacilli	-0.1646**	-0.2619***	-0.4069***	0.236***	-0.4693***	-0.1347*	0.3224***	0.3314***	0.3336***	-0.1511*	-0.3389***	-0.397***
Firmicutes_BRH-c20a	0.0138	-0.0178	0.0025	-0.0104	-0.0099	0.0042	-0.0852	-0.005	0.0538	-0.0537	-0.0075	-0.0046
Firmicutes_Clostridia	-0.1838**	-0.1862**	-0.2478***	0.162*	-0.3437***	-0.1271*	0.1103.	0.0263	0.3644***	-0.3509***	-0.1076.	-0.1568*
Firmicutes_Erysipelotrichia	0.0361	0.0199	0.0278	0.0617	0.0369	-0.0307	-0.0652	0.0263	-0.0404	0.0693	-0.0866	-0.0769
Firmicutes_Limnochordia	-0.0036	-0.0392	-0.1014	0.2176***	-0.0983	-0.0275	0.1618*	0.111.	0.0742	-0.048	-0.0528	-0.0859
Firmicutes_NA	0.1779**	0.1206.	0.0807	0.0236	0.105.	0.0678	0.1271*	-0.0171	-0.2156***	0.3289***	0.0873	0.0483
Firmicutes_Negativicutes	-0.1808**	-0.132*	-0.2168***	0.0887	-0.3778***	-0.3664***	0.2334***	-0.094	0.2376***	-0.1221.	0.0156	0.037
Fusobacteria_Fusobacteriia	0.013	0.0296	0.0897	0.0115	-0.0589	0.0366	0.0252	0.0214	-0.0261	-0.0156	0.0604	0.0704
GAL15_uncultured bacterium	0.2626***	0.1264*	0.0343	0.2059**	0.1377*	0.1841**	-0.0324	0.266***	-0.1258*	0.2457***	-0.1442*	-0.1625**
GAL15_uncultured Firmicutes bacterium	0.036	0.0092	0.0219	0.0776	0.0535	0.0091	0.0074	-0.0548	-0.0373	0.0204	0.0133	0.011
Gemmatimonadetes_AKAU4049	0.1495*	0.1052.	-0.0055	0.1384*	0.0793	0.1495*	0.0351	0.1466*	-0.072	0.1495*	-0.0757	-0.1163.
Gemmatimonadetes_BD2-11 terrestrial group	0.0926	-0.0223	-0.0692	0.1306*	-0.1284*	4e-04	0.1966**	0.2073***	-0.0331	0.1359*	-0.0644	-0.098
Gemmatimonadetes_Gemmatimonadetes	-0.2594***	-0.2213***	-0.3463***	-0.0452	-0.5122***	-0.4885***	0.5126***	0.0893	0.1224.	0.1239*	-0.0598	-0.0109
Gemmatimonadetes_Longimicrobia	0.0306	0.0453	-0.0632	0.1222.	-0.0559	-0.0119	0.163**	0.0808	-0.0022	0.0631	0.0131	-0.0257
Gemmatimonadetes_S0134 terrestrial group	0.1572*	0.1832**	0.4014***	-0.0076	0.4414***	0.1694**	-0.3347***	-0.2835***	-0.2665***	-0.0524	0.2286***	0.2643***
GN01_uncultured bacterium	0.0586	-0.0247	0.0143	0.0404	0.0299	-0.0612	0.0169	0.0641	-0.0065	-0.0117	0.0404	0.0873
Halanaerobiaeota_Halanaerobiia	0.0829	0.0703	-0.0062	0.225***	-0.0512	0.0871	0.1746**	0.1203.	-0.0143	-0.0066	-0.0046	-0.0443
Hydrogenedentes_Hydrogenedentia	0.2773***	0.2937***	0.3611***	0.1288*	0.31***	0.0693	-0.1611*	-0.1607*	-0.272***	0.1192.	0.2105***	0.1848**
Kiritimatiellaeota_Kiritimatiellae	0.1311*	0.1985**	-0.0297	0.2205***	0.059	-0.0577	0.0356	-0.1329*	-0.0065	0.0877	0.1171.	0.0505
Latescibacteria_Latescibacteria	0.3317***	0.1612*	0.1555*	0.0801	0.1484*	-0.0351	0.0205	0.0829	-0.1899**	0.2743***	0.1359*	0.1579*
Latescibacteria_Latescibacteria bacterium DG_63	-0.0125	0.0753	-0.0174	-0.0517	-0.0231	-0.071	0.0046	-0.051	-0.0213	0.0739	-0.0231	-0.0116
Latescibacteria_metagenome	0.0886	-0.0621	0.0509	0.0519	-0.0226	0.1248*	-0.0499	0.2497***	-0.0258	0.0244	-0.162**	-0.1579*
Latescibacteria_NA	0.0365	-0.0577	0.0389	-0.1432*	0.0188	0.0555	0.022	0.1556*	-0.083	0.064	-0.0889	-0.0814
Latescibacteria_uncultured Acidobacterium sp.	-0.0751	-0.025	-0.1788**	-0.0725	-0.1765**	-0.114.	0.1043.	0.028	0.1096.	0.0128	-0.0802	-0.0953
Latescibacteria_uncultured bacterium	0.3885***	0.2921***	0.3626***	0.0929	0.3919***	0.2894***	-0.1768**	-0.0832	-0.328***	0.2143***	0.1657**	0.1124.
Latescibacteria_uncultured bacterium mle1-16	0.3726***	0.2274***	0.2548***	0.1915**	0.3626***	0.4609***	-0.138*	0.3406***	-0.2583***	0.1008	-0.0854	-0.1546*
Latescibacteria_uncultured Bacteroidetes bacterium	0.0664	-0.0299	-0.0326	0.0482	0.0247	0.0794	0.0742	0.0641	-0.0352	0.0456	-0.0143	-0.03
Latescibacteria_uncultured Desulfuromonadales bacterium	-0.0083	-0.0688	-0.0099	-0.0612	-0.0288	-0.0953	0.0521	-2e-04	-0.0221	0.0661	0.0275	0.0667
Latescibacteria_uncultured Fibrobacteres bacterium	0.1495*	0.1052.	-0.0055	0.1384*	0.0793	0.1495*	0.0351	0.1466*	-0.072	0.1495*	-0.0757	-0.1163.
Latescibacteria_uncultured Latescibacteria bacterium	0.1325*	0.1144.	0.1775**	0.0505	0.123.	0.1279*	-0.1134.	-0.0355	-0.1292*	0.0641	0.0689	0.0484
Latescibacteria_uncultured low G+C Gram-positive bacterium	0.1775**	0.2119***	0.237***	0.0446	0.2655***	0.1083.	-0.2249***	-0.0965	-0.1897**	0.1147.	0.0478	0.0567
Latescibacteria_uncultured Pelobacter sp.	0.2707***	0.1086.	0.1108.	0.1777**	0.1445*	0.0567	0.0227	0.0419	-0.0749	0.0441	0.1871**	0.2171***
Latescibacteria_uncultured prokaryote	0.0379	-0.0977	-0.0397	0.0081	-0.0564	-0.0379	0.0141	0.1776**	0.0343	-0.0162	-0.0829	-0.0549
Latescibacteria_uncultured proteobacterium	0.163**	0.0851	0.1593*	0.2174***	0.0975	0.1598*	-0.13*	0.0422	-0.0219	-0.0758	0.0384	0.009
Latescibacteria_uncultured soil bacterium	0.1404*	-0.1175.	-0.0743	-0.0385	-0.0212	0.0945	-0.0065	0.2278***	0.0731	0.0094	-0.068	-0.0898
Latescibacteria_uncultured soil bacterium PBS-II-5	0.1544*	0.1686**	0.1671**	0.103	0.0921	0.0258	-0.0493	-0.148*	-0.1457*	0.131*	0.1609*	0.1478*
Latescibacteria_uncultured soil bacterium PBS-III-30	0.0565	0.0146	0.0385	0.0889	0.0273	0.0039	-0.0938	-0.0122	0.0205	0.0439	0.021	0.0122
Latescibacteria_uncultured soil bacterium PBS-III-32a	0.1162.	0.0256	0.0292	0.0738	0.092	0.0611	-0.0161	0.0743	-0.0719	0.0848	-0.0295	-0.0186
Latescibacteria_uncultured soil bacterium PRR-10	-0.041	-0.0564	-0.1121.	0.0533	-0.0236	0.0236	0.0182	-0.0101	0.0948	-0.0545	-0.0162	-0.0238
Latescibacteria_uncultured soil bacterium PRR-12	-0.0658	-0.0208	0.0458	0.1649**	0.0385	-0.0661	-0.1629**	-0.1346*	0.0427	-0.0773	-0.1073.	-0.0977
Latescibacteria_unidentified bacterium wb1_H11	0.0872	0.0977	0.1029	-0.0117	0.0924	0.0664	-0.0638	-0.0589	-0.082	-0.0039	0.1055.	0.0664
LCP-89_saltmarsh clone LCP-89	0.1752**	0.1872**	0.1524*	0.0822	0.2093***	0.1223.	-0.0822	-0.0354	-0.1616*	0.1132.	0.1043.	0.0837
LCP-89_uncultured bacterium	-0.0309	-0.024	0.0531	0.0282	0.006	-0.0363	-0.0525	-0.0731	0.0067	0.0102	0.0077	0.002
Lentisphaerae_Lentisphaeria	0.1133.	0.0932	0.0952	0.1277*	0.1092.	0.0676	-0.0312	-0.0081	-0.0286	-0.0198	0.0749	0.0808
Lentisphaerae_Oligosphaeria	0.1358*	0.1087.	0.1289*	0.1912**	0.223***	0.011	-0.182**	-0.038	-0.0819	0.0899	-0.0596	-0.0447
Margulisbacteria_metagenome	-0.1034	-0.1209.	-0.0988	-0.0998	-0.0224	0.1032	-0.0754	0.0352	0.1274*	-0.1301*	-0.0831	-0.1016
Margulisbacteria_microbial mat metagenome	0.0768	0.043	0.043	0.1055.	0.0169	0.0872	0.056	0.0641	-0.0273	-0.0247	0.0299	0.0117
Margulisbacteria_uncultured bacterium	-0.0133	0.0866	0.0217	-0.0445	-0.0171	-0.0151	0.0667	-0.1068.	-0.0754	0.0849	0.0551	0.0275
Margulisbacteria_uncultured delta proteobacterium	0.0194	0.0488	0.1384*	-0.0608	0.057	-0.0053	-0.1427*	-0.1767**	-0.0948	0.043	0.0696	0.038
Margulisbacteria_uncultured Gram-positive bacterium	-0.02	0.0304	-0.0349	0.0115	-0.0698	-0.0792	0.0921	-0.0703	0.0112	0.0089	0.0667	0.0613
Margulisbacteria_uncultured organism	0.043	0.0104	0.0091	0.0872	0.0013	-0.0326	0.0404	-0.0079	0.0299	-0.0534	0.0977	0.1055.
Modulibacteria_Moduliflexia	0.0722	0.0473	0.0699	0.041	0.0096	0.0137	-0.0792	-0.0226	0.0267	-0.0532	0.0699	0.0944
NA_NA	-0.044	0.1188.	-0.0877	-0.0669	-0.1775**	-0.2383***	0.154*	-0.1724**	-0.0549	0.2428***	0.0461	-0.0415
Nitrospinae_P9X2b3D02	-0.1464*	-0.0982	-0.2704***	-0.0303	-0.0708	0.1807**	-0.0576	0.33***	0.2064***	-0.0904	-0.3859***	-0.4398***
Nitrospirae_4-29-1	0.0284	0.1258*	0.1376*	-0.2015**	0.4411***	0.5664***	-0.3998***	0.0489	-0.1371*	-0.0648	-0.1863**	-0.2953***
Nitrospirae_661256	-0.0247	-0.0195	0.0586	-0.0898	-0.0273	-0.0404	-0.0534	-0.0916	-0.0586	0.0898	0.0195	0.0274
Nitrospirae_Nitrospira	-0.3177***	-0.4621***	-0.6244***	-0.112.	-0.3921***	-0.1108.	0.2741***	0.6124***	0.3443***	-0.0418	-0.6414***	-0.6056***
Nitrospirae_Thermodesulfovibrionia	0.2747***	0.3764***	0.2297***	-0.1105.	0.5063***	0.3053***	-0.2619***	-0.0601	-0.2995***	0.1442*	0.1218.	0.0943
Omnitrophicaeota_Candidatus Omnitrophica bacterium CG1_02_44_16	-0.0637	-0.0302	0.0114	-0.0226	0.0748	0.0552	-0.1538*	-0.0614	0.0472	-0.0685	-0.0423	-0.0596
Omnitrophicaeota_Candidatus Omnitrophus magneticus	-0.0502	0.0258	-0.0438	-0.061	-0.0776	-0.1212.	0.0569	-0.1171.	-0.01	0.0742	0.0035	0.0069
Omnitrophicaeota_NA	0.1045.	0.0353	0.0477	-0.0171	0.1352*	0.0252	-0.1401*	-0.0411	-0.0531	0.0923	-0.0452	-0.0248
Omnitrophicaeota_Omnitrophia	0.0222	0.131*	0.0544	-0.0046	0.0637	-0.0772	-0.0906	-0.2133***	-0.0485	0.0664	0.0469	0.0035
Omnitrophicaeota_Omnitrophica WOR_2 bacterium RIFCSPLOWO2_12_FULL_51_24	0.0426	0.0251	0.0323	-0.0123	0.0817	0.034	-0.0566	0.0344	-0.0161	0.0083	0.0243	0.0347
Omnitrophicaeota_Omnitrophica WOR_2 bacterium RIFOXYA2_FULL_38_17	0.1337*	0.1126.	0.0782	0.0957	0.0537	0.0851	0.0207	0.0253	-0.0588	0.0216	0.0598	0.0231
Omnitrophicaeota_uncultured bacterium	-0.1193.	0.1083.	-0.1778**	0.0096	-0.1332*	-0.3511***	0.2231***	-0.2223***	0.0127	0.1588*	0.0512	0.0085
Omnitrophicaeota_uncultured Banisveld landfill bacterium BVC56	-0.312***	-0.1485*	-0.2311***	-0.3708***	-0.158*	-0.0651	-0.0362	-0.0033	0.1434*	-0.0599	-0.1787**	-0.2077***
Omnitrophicaeota_uncultured beta proteobacterium	-0.0569	-0.0384	-0.0985	0.0295	-0.0847	-0.0719	0.082	0.0692	0.0555	-0.0078	-0.0518	-0.0457
Omnitrophicaeota_uncultured Firmicutes bacterium	-0.136*	-0.1371*	-0.1471*	-0.1055.	-0.1591*	-0.0014	0.0089	-0.0039	0.178**	-0.1627**	-0.0587	-0.0904
Omnitrophicaeota_uncultured organism	0.0939	-2e-04	-0.0552	0.1337*	0.0309	0.0243	0.0562	0.084	-4e-04	0.0447	-0.0571	-0.0732
Omnitrophicaeota_uncultured planctomycete	0.0518	0.0272	0.0339	-0.0215	0.049	0.0168	-0.0056	-0.0174	-0.0293	0.0433	0.0388	0.0229
Omnitrophicaeota_uncultured prokaryote	-1e-04	-0.0201	-0.0436	-0.0381	-0.0132	0.0093	0.0288	0.0208	0.008	-0.0362	0.0204	-9e-04
Omnitrophicaeota_uncultured soil bacterium PBS-87	0.0534	0.0898	0.0898	0.0091	0.0768	0.0586	0.0039	-0.0589	-0.0924	0.0534	0.082	0.0586
Omnitrophicaeota_uncultured Verrucomicrobia bacterium	0.0914	0.1311*	0.1272*	-5e-04	0.148*	0.0588	-0.0185	-0.0871	-0.1418*	0.1148.	0.0635	0.0742
Patescibacteria_ABY1	-0.139*	0.0302	-0.2164***	-0.1439*	-0.1091.	-0.1113.	0.154*	0.0177	0.0054	0.2045**	-0.1299*	-0.1661**
Patescibacteria_Berkelbacteria	0.1085.	0.1578*	0.142*	0.0199	0.0581	0.0957	-0.0168	-0.14*	-0.1111.	0.0091	0.1888**	0.1468*
Patescibacteria_CPR2	0.2063***	0.1278*	0.1655**	0.1531*	0.1297*	0.2547***	-0.0515	0.2394***	-0.1533*	0.0549	-0.0989	-0.12.
Patescibacteria_Gracilibacteria	0.3756***	0.3557***	0.2269***	0.1058.	0.3326***	0.2435***	-0.0269	0.0239	-0.3108***	0.2458***	0.1225.	0.0392
Patescibacteria_Kazania	0.1153.	0.0778	0.0875	0.206**	0.0889	0.0234	-0.0605	0.048	-0.0114	-0.0329	0.0094	0.0154
Patescibacteria_Microgenomatia	0.2002**	0.1744**	0.2324***	0.0655	0.2568***	0.2355***	-0.1246*	0.0168	-0.1738**	0.0608	0.0071	-0.0358
Patescibacteria_NA	-0.068	-0.0362	-5e-04	-0.0319	-0.0242	-0.0153	-0.1327*	-0.1222.	0.0657	-0.1092.	-0.0473	-0.0678
Patescibacteria_Parcubacteria	0.0639	0.0851	-0.0539	-0.0324	0.0287	-0.0058	0.0164	-0.0651	-0.08	0.2277***	-0.0363	-0.0825
Patescibacteria_Saccharimonadia	-0.4531***	-0.2853***	-0.4258***	-0.205**	-0.5098***	-0.4287***	0.3385***	-0.1814**	0.2334***	0.0595	-0.1388*	-0.115.
Patescibacteria_uncultured	0.0504	0.0529	0.0734	0.0046	0.0674	-0.0188	0.0205	-0.0457	-0.051	0.0467	0.0911	0.1009
Patescibacteria_WWE3	-0.0456	-0.0797	-0.004	0.0856	-2e-04	-0.0072	-0.0869	0.0546	0.0583	-0.0888	-0.1182.	-0.1352*
PAUC34f_NA	-0.1412*	-0.063	-0.0499	-0.0323	-0.0469	-0.067	-0.077	-0.1283*	0.0678	-0.0362	-0.0676	-0.0939
PAUC34f_uncultured Deferribacteres bacterium	0.0753	0.048	0.0182	0.176**	0.0664	0.0627	-0.066	0.0486	0.0211	-0.0093	-0.0712	-0.0943
Planctomycetes_BD7-11	-0.197**	-0.0723	-0.0452	-0.1539*	-0.102	-0.094	-0.0761	-0.1186.	0.0173	0.0472	-0.152*	-0.1877**
Planctomycetes_Brocadiae	0.1721**	0.1245*	0.1438*	0.053	0.121.	0.0635	-0.1351*	0.0046	-0.0914	0.0811	0.0606	0.0608
Planctomycetes_NA	0.262***	0.3139***	0.2989***	0.1348*	0.2639***	0.0358	-0.1279*	-0.1604*	-0.2521***	0.1571*	0.1928**	0.1565*
Planctomycetes_OM190	0.0516	-0.1289*	-0.1981**	0.0547	-0.1202.	0.0363	0.1565*	0.4456***	0.0594	0.085	-0.3328***	-0.3461***
Planctomycetes_Phycisphaerae	0.391***	0.472***	0.5123***	0.1307*	0.2965***	-0.1903**	0.0809	-0.4642***	-0.512***	0.3962***	0.5891***	0.6402***
Planctomycetes_Pla3 lineage	0.2473***	0.1065.	0.3383***	0.2263***	0.3473***	0.1593*	-0.3485***	-0.0101	-0.1379*	-0.0505	0.0339	0.0445
Planctomycetes_Pla4 lineage	0.0603	0.0476	-0.0504	-0.0018	0.0526	0.0172	0.0175	0.0925	-0.1234.	0.2789***	-0.1315*	-0.16*
Planctomycetes_Planctomycetacia	0.1992**	0.3136***	0.3456***	-0.1454*	0.1453*	0.1132.	0.0504	-0.2278***	-0.4501***	0.4288***	0.16*	0.0563
Planctomycetes_vadinHA49	4e-04	-0.0676	-0.0604	-0.0835	0.0199	0.0745	-0.0397	0.0386	0.0204	0.0453	-0.1292*	-0.1559*
Poribacteria_uncultured Firmicutes bacterium	0.1323*	0.1014	0.1082.	0.0761	0.116.	0.0236	-0.0708	-0.015	-0.0691	0.0104	0.1013	0.1015
Proteobacteria_Alphaproteobacteria	-0.0567	-0.1825**	-0.1248*	0.1586*	-0.2423***	-0.2533***	0.2321***	-0.1438*	0.1768**	-0.0574	0.2294***	0.2556***
Proteobacteria_Deltaproteobacteria	0.3003***	0.2781***	0.2842***	0.2722***	0.5103***	0.2063***	-0.3653***	0.0324	-0.16*	-0.0101	-0.0203	0.0143
Proteobacteria_Gammaproteobacteria	-0.0768	-0.2072***	-0.1264*	0.1502*	-0.1814**	0.0374	0.0842	0.0508	0.1887**	-0.0955	-0.1105.	-0.139*
Proteobacteria_NA	-0.1907**	-0.1745**	-0.1871**	-0.007	-0.0699	-0.0401	-0.0703	0.0036	0.2214***	-0.1225.	-0.1947**	-0.2311***
Rokubacteria_NC10	0.0817	-0.1044.	-0.0863	0.0071	0.0896	0.026	-0.038	0.2789***	-0.0185	0.0975	-0.2447***	-0.2211***
Schekmanbacteria_Candidatus Schekmanbacteria bacterium RIFCSPLOWO2_02_FULL_38_14	-0.1291*	-0.1001	-0.1818**	-0.0907	-0.1571*	-0.1026	0.1326*	0.0419	0.11.	-0.0304	-0.0699	-0.0676
Schekmanbacteria_NA	0.0977	0.0664	0.0742	0.056	0.1055.	0.0065	-0.0977	0.0406	-0.0664	0.0742	-0.0273	0.0039
Schekmanbacteria_uncultured bacterium	0.0518	0.0747	-0.0869	0.098	-0.0244	0.0204	0.119.	0.121.	-0.0133	0.1272*	-0.0813	-0.1194.
Spirochaetes_Brachyspirae	-0.044	-0.0349	0.0019	0.0645	-0.0426	-0.0811	-0.081	-0.1066.	0.0941	-0.0996	-0.005	-0.017
Spirochaetes_Leptospirae	0.3258***	0.3429***	0.317***	0.2849***	0.3984***	0.2501***	-0.0875	-0.1116.	-0.2906***	0.1973**	0.1795**	0.0685
Spirochaetes_MVP-15	-0.137*	-0.1025	-0.1254*	0.018	-0.1155.	-0.1084.	0.0212	-0.0311	0.1309*	-0.0671	-0.1049.	-0.106.
Spirochaetes_NA	0.0977	0.0664	0.0742	0.056	0.1055.	0.0065	-0.0977	0.0406	-0.0664	0.0742	-0.0273	0.0039
Spirochaetes_Spirochaetia	0.3955***	0.3784***	0.34***	0.3661***	0.3692***	0.1105.	-0.0783	-0.1819**	-0.272***	0.1917**	0.2799***	0.2167***
Spirochaetes_V2072-189E03	0.1772**	0.1851**	0.1616*	0.1711**	0.1839**	0.1314*	-0.0446	-0.0636	-0.1455*	0.1033	0.0893	0.0241
TA06_NA	0.1961**	0.1763**	0.1659**	0.0785	0.197**	0.1167.	-0.0632	-0.0858	-0.1678**	0.0579	0.1674**	0.1607*
TA06_uncultured bacterium	0.1805**	0.3868***	0.2722***	0.1338*	0.364***	0.0606	-0.2505***	-0.3138***	-0.1863**	0.0497	0.2118***	0.157*
TA06_uncultured bacterium SHA-114	-0.036	-0.0918	-0.0855	-0.0476	-0.0278	0.0246	-0.101	0.0515	0.1277*	-0.1085.	-0.0519	-0.0673
TA06_uncultured soil bacterium	0.193**	0.2627***	0.3744***	0.2213***	0.2837***	-0.0503	-0.1919**	-0.2651***	-0.2458***	0.1278*	0.1867**	0.2617***
Tenericutes_Mollicutes	0.1265*	0.091	0.0816	0.1514*	0.0806	0.0355	-0.0305	0.0035	-0.0337	0.0178	0.054	0.0656
uncultured_uncultured bacterium	-0.0753	-0.0844	-0.0914	-0.1517*	-0.0926	0.0425	-0.0237	-0.0437	0.0979	-0.1354*	-0.0034	-0.0426
Verrucomicrobia_Verrucomicrobiae	0.2556***	0.449***	0.5741***	-0.1951**	0.2998***	-0.1946**	-0.0815	-0.4617***	-0.6235***	0.5396***	0.3425***	0.3893***
WOR-1_candidate division WOR-1 bacterium RIFCSPHIGHO2_01_FULL_53_15	0.1384*	0.0941	0.1052.	0.0793	0.1495*	0.0092	-0.1384*	0.0575	-0.0941	0.1052.	-0.0387	0.0055
WOR-1_candidate division WOR-1 bacterium RIFOXYA12_FULL_43_27	-0.0813	-0.0254	0.0185	0.0661	0.0321	-0.0661	-0.1367*	-0.127*	0.0586	-0.0662	-0.1069.	-0.11.
WOR-1_NA	0.0676	0.1057.	0.0418	0.1023	0.1864**	0.1111.	-0.1198.	-0.0775	-0.0722	0.0504	-0.0473	-0.122.
WOR-1_uncultured bacterium	0.1799**	0.2781***	0.315***	0.13*	0.303***	0.0561	-0.2775***	-0.2234***	-0.2084***	0.0988	0.0825	0.0497
WPS-2_bacterium ADurb.Bin236	-0.0716	0.0326	-0.0586	-0.0716	-0.1003	-0.0794	0.0898	-0.0916	-0.0143	0.0664	-0.0039	-0.0195
WPS-2_Burkholderiales bacterium Beta_02	-0.0681	3e-04	0.0131	0.0589	-0.0315	-0.0478	-0.0236	-0.0703	0.0607	-0.0811	-0.0161	-0.0059
WPS-2_hydrothermal vent metagenome	0.0872	0.0977	0.1029	-0.0117	0.0924	0.0664	-0.0638	-0.0589	-0.082	-0.0039	0.1055.	0.0664
WPS-2_metagenome	-0.1318*	-0.1689**	-0.1919**	-0.0582	-0.1852**	-0.0814	0.0568	0.1449*	0.1753**	-0.1239*	-0.1181.	-0.1275*
WPS-2_NA	-0.0892	-0.0501	-0.0096	-0.0308	-0.0794	-0.1098.	-0.0184	-0.2086***	0.0356	0.0032	0.0604	0.0598
WPS-2_uncultured bacterium	-0.1476*	0.0122	0.0358	-0.2465***	-0.121.	-0.2156***	0.0669	-0.2752***	-0.1243*	0.2694***	0.0241	0.0245
WPS-2_uncultured forest soil bacterium	-0.0986	-0.0123	-0.1181.	-0.0842	-0.1459*	-0.1392*	0.1432*	0.0145	0.0467	0.0283	-0.0689	-0.0795
WS1_metagenome	-0.0582	-0.0042	-0.02	-0.0988	-0.0642	-0.0856	0.0344	-0.1127.	0.0085	0.042	0.0623	0.0582
WS1_NA	-0.015	-0.0102	-0.0147	-0.0225	-0.0444	0.0291	-0.0693	-0.0193	0.0632	-0.0714	-0.0491	-0.087
WS1_uncultured actinobacterium	0.0977	0.0664	0.0742	0.056	0.1055.	0.0065	-0.0977	0.0406	-0.0664	0.0742	-0.0273	0.0039
WS1_uncultured Armatimonadetes bacterium	0.0872	0.0977	0.1029	-0.0117	0.0924	0.0664	-0.0638	-0.0589	-0.082	-0.0039	0.1055.	0.0664
WS1_uncultured bacterium	-0.0471	-0.012	-0.0421	-0.0273	0.0303	0.0414	-0.0848	0.0038	0.0819	-0.0894	-0.0894	-0.1023
WS1_uncultured bacterium SJA-43	0.0349	-0.0119	-0.0124	0.1501*	-0.0546	0.0358	0.0298	0.022	0.015	0.0228	-0.0582	-0.0786
WS1_uncultured Streptomyces sp.	0.0323	0.0076	-0.0061	0.0228	-0.0724	-0.0679	0.0505	0.0187	0.0439	-0.0278	0.0765	0.0727
WS2_NA	0.0117	0.0138	0.049	0.0956	0.0165	0.0587	0.04	0.04	-0.0015	-0.0308	0.0381	0.072
WS2_uncultured bacterium	0.2164***	0.1888**	0.2077***	0.2604***	0.2035**	0.1515*	-0.1096.	0.004	-0.1589*	0.0891	-0.0059	-0.0522
WS2_uncultured Firmicutes bacterium	0.104.	-0.0584	0.0302	0.1386*	0.0893	0.2625***	-0.1042.	0.2219***	0.0303	-0.087	-0.1486*	-0.1843**
WS2_uncultured microorganism	0.073	-0.0113	-0.0164	0.0989	-0.0138	-0.01	0.0305	0.042	0.0667	-0.0749	0.0827	0.0867
WS2_uncultured soil bacterium	-0.1036	0.0062	-0.1185.	-0.0826	-0.1885**	-0.2015**	0.1723**	-0.1136.	0.0046	0.1134.	0.0271	0.0194
WS4_metagenome	0.0716	0.1029	0.1081.	-0.0534	0.082	0.0534	-0.0117	-0.0916	-0.0977	0.0221	0.0638	0.0404
WS4_NA	-0.1099.	-0.0204	-0.0229	-0.1651**	-0.099	-0.0652	-0.0063	-0.1479*	-0.0295	0.1044.	-0.005	-0.0168
WS4_uncultured bacterium	0.1337*	0.0988	0.1332*	0.1086.	0.0052	0.1313*	-0.0328	0.0781	-0.0512	-0.028	0.0091	-0.026
WS4_uncultured Clostridia bacterium	0.0242	-0.0314	0.0515	-0.0347	0.002	-0.072	-0.0256	-0.019	-0.046	0.0551	0.0425	0.0814
WS4_uncultured organism	0.0368	-0.028	0.0266	-0.0103	-0.0323	-0.0052	-0.0069	-0.0502	-0.0194	0.0407	0.0548	0.0443
Zixibacteria_bacterium enrichment culture clone Anammox_55	0.1967**	0.2138***	0.1719**	0.0703	0.16*	0.0104	-0.1008	-0.1613*	-0.1692**	0.2243***	0.1175.	0.0525
Zixibacteria_bioreactor metagenome	0.0468	0.1331*	0.165**	0.0333	0.1571*	0.0613	-0.1249*	-0.1835**	-0.0973	-0.0016	0.0701	0.0318
Zixibacteria_candidate division Zixibacteria bacterium RBG-1	0.0977	0.0664	0.0742	0.056	0.1055.	0.0065	-0.0977	0.0406	-0.0664	0.0742	-0.0273	0.0039
Zixibacteria_NA	0.241***	0.2014**	0.1343*	0.1527*	0.171**	0.1537*	-0.0535	-0.0174	-0.1505*	0.096	0.0968	0.1107.
Zixibacteria_uncultured bacterium	0.3849***	0.4288***	0.4815***	0.1599*	0.4119***	0.2069***	-0.1792**	-0.1147.	-0.4712***	0.3538***	0.0753	0.0235
Zixibacteria_uncultured candidate division TA06 bacterium	0.2972***	0.4241***	0.4587***	0.0958	0.4528***	0.2167***	-0.2313***	-0.3029***	-0.4017***	0.1583*	0.2592***	0.1796**
Zixibacteria_uncultured delta proteobacterium	0.1486*	0.1228.	0.296***	0.0808	0.29***	0.1304*	-0.2194***	-0.0463	-0.1448*	-0.0202	0.0066	0.0155
Zixibacteria_uncultured prokaryote	0.1408*	0.1231.	0.1318*	0.1859**	-0.0524	0.0042	0.0988	0.0747	-0.1349*	0.1377*	0.1223.	0.1354*
Fungi	Ca	CEC	Clay	K	Mg	Na	P2O5	pH	Sand	Silt	SOM	TN
Ascomycota_Archaeorhizomycetes	-0.038	0.0532	0.0228	0.0076	-0.0532	-0.0228	0.0532	0	0.038	-0.0532	0.0684	0.1139
Ascomycota_Arthoniomycetes	NaN	NaN	NaN	NaN	NaN	NaN	NaN	NaN	NaN	NaN	NaN	NaN
Ascomycota_Dothideomycetes	-0.0501	-0.2563***	0.0184	-0.0934	-0.2098**	0.0119	0.1225	0.055	0.0974	-0.229**	0.2177**	0.1921*
Ascomycota_Eurotiomycetes	0.1062	-0.0872	0.2649***	0.1121	0.2218**	0.1745*	-0.1492.	-0.0875	-0.1844*	-0.0124	0.0382	-0.0022
Ascomycota_Lecanoromycetes	NaN	NaN	NaN	NaN	NaN	NaN	NaN	NaN	NaN	NaN	NaN	NaN
Ascomycota_Leotiomycetes	-0.3793***	-0.304***	-0.0169	-0.2753***	0.0119	-0.2249**	-0.3829***	-0.3372***	0.1997*	-0.2225**	-0.0598	-7e-04
Ascomycota_NA	-0.1402.	-0.1413.	-0.0059	-0.1388.	0.0104	-0.1508.	0.0059	-0.2102**	-0.1038	0.1776*	-0.0844	-0.0599
Ascomycota_Orbiliomycetes	-0.0594	-0.1849*	-0.037	0.09	-0.0489	0.0824	-0.0856	0.0694	0.1612*	-0.2846***	-0.1184	-0.1542.
Ascomycota_Pezizomycetes	0.3038***	0.2445**	-0.0218	0.5853***	0.0919	0.0379	0.1	0.2924***	0.0029	0.0563	-0.1225	-0.1412.
Ascomycota_Saccharomycetes	0.3109***	0.3024***	0.1561*	0.2017*	0.3314***	0.4108***	-0.293***	0.3592***	-0.0494	-0.0918	-0.1349.	-0.1131
Ascomycota_Sordariomycetes	0.1804*	0.0887	-0.1649*	0.3661***	-0.0448	0.1868*	0.238**	0.3559***	0.0826	-0.074	-0.0458	-0.1303.
Ascomycota_Taphrinomycetes	1e-04	0.0582	0.0502	-0.0155	0.0249	-0.1134	-0.047	-0.1388.	-0.0466	0.0354	0.032	0.0258
Ascomycota_unidentified	NaN	NaN	NaN	NaN	NaN	NaN	NaN	NaN	NaN	NaN	NaN	NaN
Basidiomycota_Agaricomycetes	0.4377***	0.3021***	0.2857***	0.2629***	0.1954*	0.2005*	0.083	0.1319.	-0.2725***	0.1523.	0.2496**	0.2524**
Basidiomycota_Agaricostilbomycetes	0.0776	0.0325	0.2619***	0.2074**	0.2319**	0.1437.	-0.2936***	-0.1961*	-0.0741	-0.2123**	0.0838	0.0202
Basidiomycota_Cystobasidiomycetes	-0.2165**	-0.2639***	-0.0554	-0.1311.	-0.2626***	0.0698	-0.1689*	0.0221	0.3903***	-0.5778***	0.061	0.1013
Basidiomycota_Dacrymycetes	-0.038	0.0532	0.0228	0.0076	-0.0532	-0.0228	0.0532	0	0.038	-0.0532	0.0684	0.1139
Basidiomycota_Exobasidiomycetes	0.0749	0.1008	0.1185	-0.0216	0.065	-0.0051	-0.1011	-0.098	-0.0388	-0.0405	0.1374.	0.1197
Basidiomycota_Geminibasidiomycetes	-0.0098	-0.1144	-0.0649	0.1457.	0.0553	0.2797***	-0.0697	0.1938*	0.1684*	-0.2425**	-0.0685	-0.1179
Basidiomycota_Microbotryomycetes	-0.4071***	0.014	-0.061	-0.3957***	-0.1988*	-0.1086	-0.0873	-0.3447***	0.16*	-0.2271**	0.0205	0.0181
Basidiomycota_NA	-0.2251**	-0.2717***	0.1039	-0.333***	-0.061	-0.1737*	-0.0948	-0.1827*	-0.0567	0.094	0.0048	0.0718
Basidiomycota_Pucciniomycetes	0.1946*	0.2966***	0.2937***	-0.0413	0.1421.	0.1737*	-0.0964	-0.024	-0.2573***	0.0625	0.1794*	0.1256
Basidiomycota_Spiculogloeomycetes	NaN	NaN	NaN	NaN	NaN	NaN	NaN	NaN	NaN	NaN	NaN	NaN
Basidiomycota_Tremellomycetes	-0.2773***	-0.1522.	-0.5024***	0.1267	-0.3737***	0.0514	0.184*	0.2227**	0.5369***	-0.3999***	-0.1764*	-0.1511.
Basidiomycota_unidentified	-0.0932	-0.1989*	-0.0716	0.1168	-0.1546*	-0.1292	-0.0338	-0.0867	0.2488**	-0.2621***	0.0486	0.0558
Basidiomycota_Ustilaginomycetes	-0.0684	-0.038	-0.1139	0.038	-0.1139	-0.1291	0.1291	0.0382	0.0684	0.0076	-0.0076	-0.0228
Basidiomycota_Wallemiomycetes	0.1181	0.0642	-0.043	0.1508.	0.0428	0.0531	0.0432	0.0916	5e-04	0.0422	0.0224	0.0225
Blastocladiomycota_Blastocladiomycetes	0.1288	0.0671	-0.0046	0.1551*	-0.0033	0.0854	0.04	0.0902	0.0123	0.0059	0.0296	0.003
Cercozoa_unidentified	0.1932*	-0.0398	-0.2347**	0.3155***	-0.0811	0.037	0.3047***	0.278***	0.0946	0.0184	0.0695	0.0378
Chytridiomycota_Chytridiomycetes	-0.0104	-0.1165	-0.0796	-0.0529	-0.017	0.0995	0.0417	0.0887	0.0446	-0.0719	-0.0704	-0.071
Chytridiomycota_NA	0.2352**	0.1282	0.0191	0.2831***	0.1819*	0.0387	-0.0664	0.1805*	-0.0771	0.1507.	-0.1325.	-0.1116
Chytridiomycota_Rhizophlyctidomycetes	0.1074	0.0535	0.0533	0.1187	0.0856	-0.0433	-0.0639	0.0431	-0.021	0.0101	0.0438	0.0868
Chytridiomycota_Rhizophydiomycetes	-0.1524.	0.0212	0.3363***	-0.1389.	0.2974***	0.0763	-0.3689***	-0.3402***	-0.1655*	-0.0622	0.0927	0.0982
Chytridiomycota_Spizellomycetes	NaN	NaN	NaN	NaN	NaN	NaN	NaN	NaN	NaN	NaN	NaN	NaN
Chytridiomycota_unidentified	0.0848	0.0907	0.1069	0.2345**	0.1213	0.0566	-0.0889	0.1558*	0.0143	-0.102	-0.0655	-0.0048
Entomophthoromycota_Basidiobolomycetes	0.0119	0.0069	0.0898	-0.0539	0.0582	-0.1003	0.0449	-0.086	-0.0849	0.0917	0.1499.	0.1748*
Glomeromycota_Archaeosporomycetes	-0.3767***	-0.414***	0.0435	-0.2681***	-0.2105**	-0.2857***	-0.2616***	-0.2314**	0.0511	0.0265	-0.324***	-0.2706***
Glomeromycota_Glomeromycetes	0.0168	-0.074	0.015	0.0326	0.0504	-0.0163	-0.0375	0.0558	-0.036	0.0497	-0.1218	-0.1016
Glomeromycota_Paraglomeromycetes	-0.1522.	-0.0534	0.043	0.0439	0.0341	-0.1704*	-0.154.	-0.1891*	0.0324	-0.0446	-0.1446.	-0.0937
Monoblepharomycota_Monoblepharidomycetes	-0.0035	-0.0742	-0.0746	0.0762	0.0129	0.0032	-0.021	0.0351	0.1275	-0.1453.	0.094	0.1117
Mortierellomycota_Mortierellomycetes	0.1645*	0.2539**	0.3005***	0.0046	0.2932***	-0.2066**	0.0251	-0.2826***	-0.4875***	0.4457***	0.0839	0.0566
Mucoromycota_Endogonomycetes	-0.0162	-0.0661	-0.0178	0.0456	0.1364.	0.0991	-0.2626***	0.0445	0.1433.	-0.1783*	-0.1088	-0.0396
Mucoromycota_Mucoromycetes	NaN	NaN	NaN	NaN	NaN	NaN	NaN	NaN	NaN	NaN	NaN	NaN
Mucoromycota_Umbelopsidomycetes	0.0684	-0.0684	-0.0684	0.0532	0.0228	0.0835	0.0987	0.0917	-0.0228	0.038	-0.038	-0.0532
NA_NA	0.2868***	0.2295**	0.301***	0.0564	0.3535***	0.0216	-0.1747*	-0.02	-0.3005***	0.2392**	0.1101	0.1213
Olpidiomycota_Olpidiomycetes	0.403***	0.2815***	0.4363***	0.0147	0.4431***	0.2354**	0.0549	0.0528	-0.6195***	0.5971***	0.1007	0.0978
Rozellomycota_NA	0.1608*	0.1425.	0.1056	0.0866	0.126	0.0086	-0.0882	0.062	-0.1146	0.1108	-0.0609	-0.0241
Rozellomycota_Rozellomycotina_cls_Incertae_sedis	0.0703	0.0781	0.1163	0.0909	0.162*	-0.0527	-0.2222**	-0.0108	-0.0549	0.0471	-0.1137	-0.0599
Rozellomycota_unidentified	0.2319**	0.1711*	0.2329**	0.136.	0.2968***	-0.2193**	-0.0741	-0.1645*	-0.38***	0.4642***	-0.0063	-0.0012
unidentified_unidentified	0.2511**	0.3147***	0.2536**	0.2446**	0.2419**	-0.2075**	-0.036	-0.1073	-0.2915***	0.324***	0.1124	0.1419.
Zoopagomycota_Zoopagomycetes	-0.1625*	-0.085	-0.4466***	0.1518.	-0.388***	-0.2696***	0.5849***	-0.0155	0.1812*	0.0614	-0.0151	-0.1133
Archaea	Ca	CEC	Clay	K	Mg	Na	P2O5	pH	Sand	Silt	SOM	TN
Altiarchaeota_Altiarchaeia	0.0529	0.0949	-0.0262	0.2623***	-0.0234	-0.092	0.1287*	-0.0458	0.0026	0.0501	0.0746	0.0256
Asgardaeota_Lokiarchaeia	0.3716***	0.3832***	0.418***	0.1583*	0.4134***	0.2222***	-0.278***	-0.1527*	-0.3339***	0.1882**	0.1807**	0.122.
Asgardaeota_NA	0.0446	0.1173.	0.1075.	0.1041.	0.0529	0.0063	0.0324	-0.084	-0.0685	0.0202	0.1585*	0.1518*
Asgardaeota_Odinarchaeia	0.2387***	0.1416*	0.1255*	0.1992**	0.1455*	0.1433*	-0.0435	0.0875	-0.1119.	0.0576	0.0501	0.0273
Crenarchaeota_Bathyarchaeia	0.4529***	0.5193***	0.4909***	0.412***	0.4251***	0.0578	-0.0651	-0.3205***	-0.3565***	0.0706	0.5468***	0.5469***
Diapherotrites_Iainarchaeia	0.0301	0.0182	0.01	0.041	-0.007	0.0174	-0.0059	-0.0106	-0.0349	0.1042.	-0.0176	-0.0551
Diapherotrites_Micrarchaeia	0.1799**	0.2023**	0.2409***	0.0343	0.2397***	0.1041.	-0.2263***	-0.1651**	-0.2232***	0.207***	0.0618	0.0205
Euryarchaeota_Methanobacteria	-0.1978**	-0.1066.	-0.4508***	0.2754***	-0.5226***	-0.3121***	0.4967***	-7e-04	0.3956***	-0.1608*	0.1099.	0.0865
Euryarchaeota_Methanomicrobia	-0.3142***	-0.2002**	-0.512***	0.2967***	-0.4292***	-0.4705***	0.2974***	0.1207.	0.462***	-0.2188***	-0.1269*	-0.0564
Euryarchaeota_NA	0.0906	0.0886	0.0997	0.026	0.1237*	0.0184	-0.12.	0.0039	-0.0776	0.0776	-0.0112	0.0166
Euryarchaeota_Thermococci	0.1909**	0.1458*	0.119.	0.0923	0.1211.	0.0861	0.0166	-0.074	-0.1212.	0.0554	0.1909**	0.1374*
Euryarchaeota_Thermoplasmata	-0.2681***	-0.1832**	-0.3592***	0.0726	-0.2289***	-0.2709***	0.0728	0.1312*	0.3042***	-0.1385*	-0.2786***	-0.2356***
Hadesarchaeaeota_uncultured archaeon	-0.1072.	-0.1254*	-0.0684	-0.0645	-0.0907	-0.0677	-0.0985	-0.0017	0.1526*	-0.1712**	-0.0835	-0.0827
NA_NA	0.2322***	0.2984***	0.3299***	0.0881	0.2957***	-0.006	-0.1587*	-0.1972**	-0.2571***	0.179**	0.2008**	0.2309***
Nanoarchaeaeota_Nanohaloarchaeia	0.0772	0.0217	-0.0015	0.1004	-0.0174	-0.0258	0.0204	-0.0735	0.038	-0.0026	0.1106.	0.0897
Nanoarchaeaeota_Woesearchaeia	0.1959**	0.2419***	0.1887**	0.1169.	0.1507*	0.1834**	-0.1336*	-0.1939**	-0.1209.	0.0871	0.1822**	0.042
Thaumarchaeota_Group 1.1c	-0.1765**	0.0372	-0.2286***	-0.2563***	-0.24***	-0.1612*	0.2941***	-0.0619	-0.0451	0.1789**	-0.0827	-0.111.
Thaumarchaeota_Marine Benthic Group A	0.0252	-0.0271	0.0262	0.0368	0.0162	0.0611	-0.0857	0.0061	0.0541	-0.1021	0.0161	1e-04
Thaumarchaeota_NA	0.0644	0.0275	0.0586	-0.2178***	0.0629	-0.0439	-0.0539	-0.0336	-0.1003	0.0968	0.0515	0.0484
Thaumarchaeota_Nitrososphaeria	-0.0556	0.1686**	0.1242*	-0.3467***	0.0651	-0.0589	0.0496	-0.2492***	-0.3555***	0.4076***	-0.0718	-0.159*
Thaumarchaeota_SCGC AB-179-E04	0.1358*	0.2184***	0.2015**	0.0551	0.2127***	0.0623	-0.065	-0.1124.	-0.1812**	0.1029	0.1622**	0.142*

## Sheet: Order
Bacteria	Ca	CEC	Clay	K	Mg	Na	P2O5	pH	Sand	Silt	SOM	TN
Acidobacteria_Acidobacteriia_Acidobacteriales	-0.4458***	-0.0986	-0.2588***	-0.5421***	-0.2332***	-0.3238***	0.2191***	-0.2863***	-0.0338	0.2365***	-0.0879	-0.1341*
Acidobacteria_Acidobacteriia_NA	-0.0013	-0.0612	0.0273	-0.0273	-0.0456	0.0352	-0.0456	0.089	-0.0013	-0.0169	-0.0651	-0.0742
Acidobacteria_Acidobacteriia_Solibacterales	-0.3914***	-0.1662**	-0.274***	-0.2586***	-0.3687***	-0.5327***	0.3388***	-0.1114.	0.0272	0.1777**	-0.1212.	-0.0111
Acidobacteria_Acidobacteriia_Subgroup 12	-0.349***	-0.3284***	-0.378***	-0.2922***	-0.4422***	-0.2286***	0.2588***	0.0617	0.2091***	0.0326	-0.2881***	-0.3236***
Acidobacteria_Acidobacteriia_Subgroup 13	-0.0874	0.0176	-0.0714	-0.0615	0.1077.	-0.0075	-0.1628**	0.1077.	-0.0286	0.0976	-0.3144***	-0.3079***
Acidobacteria_Acidobacteriia_Subgroup 2	-0.3483***	-0.1164.	-0.2453***	-0.3102***	-0.1586*	-0.2067***	0.0392	-0.0306	0.0385	0.1145.	-0.3477***	-0.3854***
Acidobacteria_Aminicenantia_Aminicenantales	0.4546***	0.4852***	0.5005***	0.4179***	0.4761***	0.1039.	-0.2058**	-0.2171***	-0.2986***	0.0101	0.3927***	0.4077***
Acidobacteria_AT-s3-28_NA	0.0698	0.0817	0.0591	-0.0256	0.0864	0.0548	-0.0556	0.016	-0.0852	0.1573*	-0.0373	-0.0371
Acidobacteria_AT-s3-28_uncultured Acidobacteria bacterium	-0.0851	-0.0833	-0.0216	-0.1329*	-0.0684	0.0058	-0.0497	-0.0582	0.0281	-0.0079	-0.039	-0.0446
Acidobacteria_AT-s3-28_uncultured bacterium	-0.0238	-0.0689	-0.0618	-0.1166.	-0.1061.	0.0037	0.0189	0.0433	-0.023	0.112.	-0.0996	-0.1239*
Acidobacteria_AT-s3-28_unidentified	0.0222	-0.0321	-0.0545	-0.0083	0.0508	0.1022	-0.0377	0.0746	0.0248	0.0044	-0.0831	-0.0949
Acidobacteria_Blastocatellia (Subgroup 4)_11-24	-0.1422*	-0.3967***	-0.267***	-0.1853**	-0.1991**	-0.0018	0.0178	0.4398***	0.1657**	0.0149	-0.4599***	-0.4115***
Acidobacteria_Blastocatellia (Subgroup 4)_Blastocatellales	0.2814***	-0.072	0.1273*	0.3196***	-0.0935	0.0522	0.1587*	0.2**	0.0193	-0.0724	0.1707**	0.2427***
Acidobacteria_Blastocatellia (Subgroup 4)_Chloracidobacteriales	-0.0951	-0.0977	-0.0885	-0.0977	-0.069	0.0482	-0.0169	0.0092	0.0977	-0.1003	-0.0742	-0.0899
Acidobacteria_Blastocatellia (Subgroup 4)_DS-100	0.0242	-0.1747**	0.0268	-0.0951	-0.0162	0.1434*	-0.1464*	0.2817***	0.0129	0.0332	-0.3126***	-0.3002***
Acidobacteria_Blastocatellia (Subgroup 4)_Elev-16S-573	-0.1534*	-0.2055**	-0.1348*	-0.1764**	0.0398	0.2057**	-0.1896**	0.1473*	0.1757**	-0.1835**	-0.2187***	-0.2224***
Acidobacteria_Blastocatellia (Subgroup 4)_NA	-0.1002	-0.0321	-0.0821	-0.008	-0.1299*	-0.1641**	0.0794	-0.1304*	0.0434	0.0313	-0.0062	-0.013
Acidobacteria_Blastocatellia (Subgroup 4)_Pyrinomonadales	0.0449	-0.1225.	-0.0882	0.1284*	-0.2145***	-0.2396***	0.2359***	0.1174.	0.0031	0.1643**	0.0145	0.0973
Acidobacteria_c5LKS83_uncultured bacterium	0.1629**	0.1696**	0.1945**	0.1324*	0.112.	0.0197	-0.0717	-0.1685**	-0.093	0.0159	0.2426***	0.2441***
Acidobacteria_Fischerbacteria_Candidatus Fischerbacteria bacterium RBG_13_37_8	-0.0612	-0.0404	-0.0964	0.043	-0.1055.	-0.1081.	0.0951	0.0641	0.0456	0.0195	-0.0378	-0.0143
Acidobacteria_Holophagae_Holophagales	-0.0384	0.2679***	0.2237***	-0.0527	0.1016	-0.1222.	-0.1032	-0.4849***	-0.1672**	0.1391*	0.1934**	0.1381*
Acidobacteria_Holophagae_Subgroup 7	-0.3139***	-0.223***	-0.3071***	-0.3894***	-0.0977	-0.1583*	-0.0126	0.1362*	0.122.	-0.0336	-0.317***	-0.2436***
Acidobacteria_NA_NA	-0.005	0.0291	-0.039	0.0174	-0.093	-0.0341	0.0797	-0.0463	0.0058	0.0059	0.0152	-0.0167
Acidobacteria_Subgroup 11_NA	0.0134	-0.0657	-0.1718**	-0.0563	-0.0973	0.0454	0.0677	0.2544***	0.0475	0.0907	-0.246***	-0.2862***
Acidobacteria_Subgroup 11_uncultured Acidobacteria bacterium	-0.0417	-0.1517*	-0.1952**	-5e-04	0.0031	-0.0042	-0.0445	0.1296*	0.2292***	-0.1636**	-0.0878	-0.0443
Acidobacteria_Subgroup 11_uncultured Acidobacterium sp.	-0.1582*	-0.1419*	-0.2046**	-0.059	-0.0125	0.0409	-0.0848	0.054	0.1942**	-0.1143.	-0.1244*	-0.1446*
Acidobacteria_Subgroup 11_uncultured bacterium	0.1162.	0.0256	0.0292	0.0738	0.092	0.0611	-0.0161	0.0743	-0.0719	0.0848	-0.0295	-0.0186
Acidobacteria_Subgroup 11_uncultured soil bacterium	-0.0013	-0.0612	0.0273	-0.0273	-0.0456	0.0352	-0.0456	0.089	-0.0013	-0.0169	-0.0651	-0.0742
Acidobacteria_Subgroup 15_NA	-0.0127	0.065	-0.0659	-0.0301	-0.0308	0.0438	0.0551	0.0278	-0.0232	0.1108.	-0.0808	-0.1067.
Acidobacteria_Subgroup 15_uncultured Acidobacteria bacterium	-0.1025	6e-04	-0.1642**	0.0448	-0.2228***	-0.1886**	0.2419***	0.0208	0.045	0.0617	-0.0183	-0.0287
Acidobacteria_Subgroup 15_uncultured bacterium	0.1657**	0.1409*	0.1626**	-0.0324	0.1431*	0.0905	-0.0246	-0.0221	-0.1924**	0.0978	0.0693	0.0637
Acidobacteria_Subgroup 15_uncultured Holophaga sp.	-0.0964	-0.0513	-0.1686**	-0.0849	-0.1329*	-0.0841	0.1525*	0.0791	0.0619	0.0229	-0.0835	-0.0912
Acidobacteria_Subgroup 15_uncultured proteobacterium	0.1779**	0.0789	0.0524	0.1436*	0.0521	0.0854	0.0559	0.0344	-0.0738	0.1273*	0.0866	0.0413
Acidobacteria_Subgroup 17_metagenome	-0.011	-0.0344	-0.1199.	0.0617	-0.0801	0.073	0.1035	0.1522*	0.016	0.0739	-0.1186.	-0.1524*
Acidobacteria_Subgroup 17_NA	-0.0292	-0.0436	-0.2001**	0.0025	-0.11.	0.0369	0.2079***	0.2014**	0.0304	0.1059.	-0.1418*	-0.1865**
Acidobacteria_Subgroup 17_uncultured Acidobacteriaceae bacterium	0.0977	0.0664	0.0742	0.056	0.1055.	0.0065	-0.0977	0.0406	-0.0664	0.0742	-0.0273	0.0039
Acidobacteria_Subgroup 17_uncultured Acidobacteriales bacterium	0.0168	-0.0626	-0.041	0.1055.	-0.0549	0.0171	0.0782	0.1669**	0.0364	-0.0386	-0.0779	-0.0751
Acidobacteria_Subgroup 17_uncultured bacterium gp17	0.0271	-0.0698	-0.0148	0.0077	-0.0131	0.0624	-0.009	0.1962**	0.0095	-4e-04	-0.1568*	-0.1598*
Acidobacteria_Subgroup 17_uncultured Geobacter sp.	0.0586	0.1551*	0.0865	0.0168	0.0148	0.0193	0.0893	-0.0731	-0.0993	0.0331	0.1314*	0.0918
Acidobacteria_Subgroup 17_uncultured prokaryote	-0.0914	-0.1996**	-0.1347*	-0.1034	0.0651	0.0306	-0.2799***	0.1414*	0.2265***	-0.2134***	-0.2064***	-0.1569*
Acidobacteria_Subgroup 17_uncultured proteobacterium	0.0351	0.1246*	0.0868	0.1531*	0.0646	-0.0381	0.003	-0.0999	-0.0569	0.0315	0.0596	0.0303
Acidobacteria_Subgroup 18_NA	0.0346	-0.1576*	-0.144*	0.1832**	-0.0772	-0.0018	0.0064	0.0148	0.2364***	-0.2214***	0.0617	0.0539
Acidobacteria_Subgroup 18_uncultured Acidobacteria bacterium	-0.0642	0.0277	-0.0144	-0.0977	-0.0291	-0.081	0.107.	-0.0408	-0.05	0.1108.	0.0186	0.0324
Acidobacteria_Subgroup 18_uncultured Acidobacterium sp.	-0.0092	-0.0077	0.0443	-0.0075	-0.0591	0.0241	0.0016	0.0578	0.0092	-0.0405	0.0061	0.0143
Acidobacteria_Subgroup 18_uncultured bacterium	-0.0732	-0.0506	-0.121.	-0.0359	-0.0692	-0.0213	0.0074	0.0821	0.0296	0.0921	-0.2011**	-0.21***
Acidobacteria_Subgroup 18_uncultured prokaryote	0.1818**	0.2158***	0.2905***	-0.0248	0.3375***	0.1397*	-0.1964**	-0.0292	-0.2618***	0.0709	0.0814	0.0816
Acidobacteria_Subgroup 18_uncultured soil bacterium	0.064	0.0716	0.1277*	0.058	0.0685	0.006	-0.1056.	-0.0901	-0.059	0.033	0.0415	0.0366
Acidobacteria_Subgroup 19_uncultured bacterium	-0.0242	-0.0421	-0.0294	0.0354	0.0239	-0.0101	-0.0321	0.0143	0.0644	-0.0217	-0.047	-0.033
Acidobacteria_Subgroup 20_uncultured bacterium	0.0416	-0.0339	-0.0835	0.0191	-0.0195	0.1072.	0.0512	0.1816**	-0.0216	0.0904	-0.152*	-0.1766**
Acidobacteria_Subgroup 21_NA	0.1337*	0.0791	0.0791	0.1438*	0.0394	0.012	0.0399	0.0527	-0.0458	0.0023	0.0958	0.0942
Acidobacteria_Subgroup 21_uncultured soil bacterium	0.1265*	0.0122	0.1473*	0.2634***	0.0248	0.1565*	0.0166	0.1693**	-0.0792	0.0197	-0.0758	-0.0656
Acidobacteria_Subgroup 22_metagenome	-0.0128	-0.1565*	-0.0526	0.0117	-0.0392	-0.0841	0.0169	0.162*	0.0997	-0.115.	-0.0737	-0.008
Acidobacteria_Subgroup 22_NA	0.1882**	0.0865	0.1073.	0.1574*	0.0672	0.0631	-0.0554	-0.0614	-0.0503	0.0335	0.1046.	0.0827
Acidobacteria_Subgroup 22_uncultured Acidobacteria bacterium	0.1238*	0.0792	0.16*	-0.0183	0.1384*	0.0766	-0.1342*	0.1068.	-0.1403*	0.1279*	-0.1029	-0.089
Acidobacteria_Subgroup 22_uncultured Acidobacteriales bacterium	0.1008	0.1484*	0.1117.	0.0191	0.0839	0.0323	0.0292	-0.145*	-0.1678**	0.1701**	0.0891	0.0409
Acidobacteria_Subgroup 22_uncultured Acidobacterium sp.	0.1216.	0.1168.	0.2145***	0.058	0.2352***	0.1456*	-0.1472*	0.0398	-0.2078***	0.1636**	-0.0816	-0.0841
Acidobacteria_Subgroup 22_uncultured bacterium	-0.0128	-0.1076.	-0.1134.	-0.0102	-0.1879**	2e-04	0.1302*	0.1808**	0.0406	0.0403	-0.1391*	-0.1725**
Acidobacteria_Subgroup 22_uncultured Holophaga sp.	0.0746	0.0507	-0.1507*	0.1423*	-0.0496	-0.0113	0.2135***	0.1197.	-0.0288	0.1738**	-0.0701	-0.1121.
Acidobacteria_Subgroup 22_uncultured organism	-0.0394	0.0278	0.0454	-0.0077	0.079	0.0051	-0.1747**	-0.0951	0.0432	-0.0987	0.0021	0.0106
Acidobacteria_Subgroup 22_uncultured prokaryote	0.1552*	0.1671**	0.1489*	0.0715	0.1782**	0.1622**	-0.1379*	0.0197	-0.1237*	0.0817	0.0359	0.0152
Acidobacteria_Subgroup 22_uncultured proteobacterium	0.1426*	0.121.	0.1457*	-0.0288	0.123.	-0.0617	-0.0366	-0.1164.	-0.1601*	0.1141.	0.1368*	0.1253*
Acidobacteria_Subgroup 25_NA	0.0811	-0.1006	-0.0326	-0.0182	-0.0482	0.0317	0.1184.	0.1884**	-0.0448	0.1673**	-0.0893	-0.107.
Acidobacteria_Subgroup 25_uncultured Acidobacteria bacterium	0.1824**	0.147*	0.1618*	8e-04	0.0629	-0.0024	0.0014	-0.1272*	-0.1447*	0.105.	0.2058**	0.2004**
Acidobacteria_Subgroup 25_uncultured bacterium	0.2187***	0.144*	0.2244***	0.0338	0.281***	0.1893**	-0.2435***	0.0307	-0.1729**	0.0802	0.0239	0.0435
Acidobacteria_Subgroup 25_uncultured soil bacterium	-0.2457***	-0.1536*	-0.2481***	-0.1281*	-0.3301***	-0.1919**	0.144*	-0.0926	0.1769**	-0.0666	-0.1094.	-0.1493*
Acidobacteria_Subgroup 5_metagenome	0.1022	-0.0683	-0.1159.	0.1415*	-0.0586	-0.0154	0.1831**	0.215***	0.0196	0.0575	-0.0492	-0.0556
Acidobacteria_Subgroup 5_NA	-0.0868	-0.0554	-0.0993	-0.0591	-0.1732**	-0.1352*	0.1375*	-0.0137	0.0329	0.0621	-0.0469	-0.0593
Acidobacteria_Subgroup 5_uncultured Acidobacteriales bacterium	-0.098	-0.0129	-0.119.	-0.0354	-0.1254*	-0.1458*	0.1309*	0.0222	0.035	0.0481	-0.0204	-0.024
Acidobacteria_Subgroup 5_uncultured Acidobacterium sp.	-0.0081	-0.0244	-0.0361	0.0866	-0.0437	-0.0117	-4e-04	0.0627	0.0294	0.0112	-0.107.	-0.136*
Acidobacteria_Subgroup 5_uncultured Holophaga sp.	0.0245	0.1041.	0.099	2e-04	0.0696	-0.0466	0.0651	-0.0891	-0.1201.	0.0958	0.1202.	0.1203.
Acidobacteria_Subgroup 6_Acidobacteria bacterium SCN 69-37	0.0155	-0.0178	-0.037	0.0973	-0.0031	0.0106	0.0621	0.012	0.0073	0.0278	-0.029	-0.0472
Acidobacteria_Subgroup 6_Acidobacteria bacterium WX27	-0.066	-0.0661	0.0026	-0.1952**	-0.0112	-0.0594	0.0511	-0.0476	-0.0307	0.0758	-0.0114	0.0034
Acidobacteria_Subgroup 6_NA	0.0171	-0.0569	-0.0654	-0.0546	-0.0746	-0.0726	0.0484	0.174**	-0.0299	0.0878	-0.1524*	-0.1057.
Acidobacteria_Subgroup 6_uncultivated soil bacterium clone C112	-0.0481	-0.0694	-0.1045.	-0.0557	-0.047	0.1172.	-0.0051	0.071	0.0831	-0.0542	-0.1169.	-0.1517*
Acidobacteria_Subgroup 6_uncultured Acidobacterium sp.	0.0791	0.0626	0.0885	-0.0022	0.1068.	-0.0093	-0.0217	0.0035	-0.0997	0.1218.	0.015	0.038
Acidobacteria_Subgroup 6_uncultured Anaeromyxobacter sp.	0.0772	0.0796	0.1651**	-0.0726	0.079	-0.0209	-0.1168.	-0.1266*	-0.1236*	0.1216.	0.1018	0.1044.
Acidobacteria_Subgroup 6_uncultured bacterium 126	0.0933	-0.0661	-0.0534	0.154*	-0.0675	-9e-04	0.063	0.1527*	0.0516	-0.0138	-0.0099	0.0661
Acidobacteria_Subgroup 6_uncultured bacterium 213	-0.1113.	-0.1943**	-0.135*	0.1514*	-0.0769	0.0613	-0.0497	0.1386*	0.2455***	-0.3099***	-0.0933	-0.0871
Acidobacteria_Subgroup 6_uncultured bacterium 259	-0.0681	-0.0329	-0.1473*	-0.0055	-0.1363*	-0.0999	0.0651	0.042	0.1091.	1e-04	-0.0733	-0.0896
Acidobacteria_Subgroup 6_uncultured bacterium 92	0.0664	-0.0299	-0.0326	0.0482	0.0247	0.0794	0.0742	0.0641	-0.0352	0.0456	-0.0143	-0.03
Acidobacteria_Subgroup 6_uncultured bacterium 98	0.1055.	0.0742	-0.0039	0.0977	0.056	0.1055.	0.0247	0.1034	-0.0508	0.1055.	-0.0534	-0.0821
Acidobacteria_Subgroup 6_uncultured bacterium DA008	0.1164.	0.0315	0.0728	0.0585	0.0716	-0.0516	0.0317	0.015	-0.0398	-0.028	0.122.	0.1616*
Acidobacteria_Subgroup 6_uncultured bacterium DA023	-0.0864	-0.0232	-0.1618*	0.0327	-0.1181.	-0.1423*	0.1512*	0.0673	0.0304	0.0805	-0.0479	-0.036
Acidobacteria_Subgroup 6_uncultured bacterium mle1-25	0.0697	0.0232	0.1234.	0.0054	0.0304	0.0485	-0.0812	-0.015	-0.0776	0.0303	0.0461	0.0463
Acidobacteria_Subgroup 6_uncultured deep-sea bacterium	0.0576	0.0356	-0.0025	0.0173	0.0078	0.018	0.096	-0.0032	-0.0532	0.0428	0.031	9e-04
Acidobacteria_Subgroup 6_uncultured Geothrix sp.	0.1055.	0.0742	-0.0039	0.0977	0.056	0.1055.	0.0247	0.1034	-0.0508	0.1055.	-0.0534	-0.0821
Acidobacteria_Subgroup 6_uncultured Holophaga sp.	0.0758	-0.0925	-0.0474	0.1568*	-0.0278	0.1377*	0.0209	0.3292***	0.0314	0.0142	-0.2488***	-0.2586***
Acidobacteria_Subgroup 6_uncultured microorganism	0.1295*	0.0047	-0.029	0.1186.	0.0823	0.2263***	0.0055	0.2144***	-0.0036	0.0254	-0.0817	-0.1108.
Acidobacteria_Subgroup 6_uncultured prokaryote	0.1401*	0.0567	0.0931	0.0885	0.1499*	0.0458	-0.2113***	0.0662	-0.0046	-0.0082	-0.009	0.0555
Acidobacteria_Subgroup 6_uncultured proteobacterium	0.1697**	0.0309	0.117.	0.0081	0.1323*	0.0545	0.0237	0.1082.	-0.1268*	0.079	0.0503	0.0442
Acidobacteria_Subgroup 6_unidentified	-0.0648	-0.2662***	-0.2635***	-0.0569	-0.3217***	-0.1564*	0.1798**	0.3105***	0.2197***	-0.1218.	-0.1808**	-0.1442*
Acidobacteria_Subgroup 6_Unknown Order	0.1422*	0.0699	0.1072.	0.0635	0.0449	-0.0758	-0.0275	-0.148*	-0.0445	0.0351	0.2184***	0.2348***
Acidobacteria_Subgroup 6_wastewater metagenome	-0.0446	-0.0928	-0.078	-0.0642	-0.065	0.1189.	-0.0277	0.1053.	0.0731	-0.0577	-0.1344*	-0.1691**
Acidobacteria_Thermoanaerobaculia_Thermoanaerobaculales	-0.1973**	-0.1987**	-0.2831***	-0.1753**	-0.2111***	-0.113.	0.1159.	0.0883	0.155*	0.1377*	-0.2465***	-0.2728***
Actinobacteria_0319-7L14_uncultured bacterium	-0.1037	-0.0345	0.0455	-0.1244*	-0.0852	-0.1202.	-0.0686	-0.2066***	-0.0539	0.1186.	-0.019	-0.0183
Actinobacteria_Acidimicrobiia_Acidimicrobiales	-0.0204	-0.0098	0.0974	-0.1381*	-0.0053	-0.0581	-0.0234	-0.1267*	-0.1109.	0.1608*	0.0506	0.0604
Actinobacteria_Acidimicrobiia_Actinomarinales	0.2629***	0.1315*	0.0527	0.2553***	0.1358*	0.2246***	0.1024	0.1558*	-0.1157.	0.1298*	0.04	-0.0086
Actinobacteria_Acidimicrobiia_IMCC26256	-0.3663***	-0.1407*	-0.3696***	-0.2148***	-0.3304***	-0.3819***	0.3165***	-0.2183***	0.1029	0.2033**	-0.0481	-0.0729
Actinobacteria_Acidimicrobiia_Microtrichales	-0.3692***	-0.3818***	-0.3841***	-0.0762	-0.3094***	-0.1134.	0.0108	-0.0061	0.4682***	-0.3692***	-0.1141.	-0.0431
Actinobacteria_Acidimicrobiia_NA	0.0842	4e-04	-0.0363	0.1253*	0.0019	0.1089.	0.0288	0.0714	0.0403	-0.0456	-0.0113	-0.0616
Actinobacteria_Acidimicrobiia_uncultured	0.1503*	0.1101.	0.1547*	0.1504*	0.0474	0.0641	0.0247	-0.0767	-0.115.	0.0999	0.0692	0.0844
Actinobacteria_Actinobacteria_Catenulisporales	-0.0237	0.0354	0.0695	-0.1522*	0.0046	-0.0801	0.1052.	-0.1304*	-0.1336*	0.2027**	0.0724	0.0708
Actinobacteria_Actinobacteria_Corynebacteriales	0.189**	0.1374*	0.3758***	-0.0166	0.2436***	-0.1111.	-0.1975**	-0.4739***	-0.1309*	-0.1037	0.4699***	0.513***
Actinobacteria_Actinobacteria_Frankiales	-0.2691***	-0.0596	-0.0473	-0.2379***	-0.319***	-0.3662***	0.1708**	-0.4878***	0.0802	-0.0234	0.3067***	0.3088***
Actinobacteria_Actinobacteria_Glycomycetales	0.1546*	0.0865	0.0865	0.2122***	0.0341	0.1755**	0.1126.	0.1291*	-0.055	-0.0498	0.0603	0.0236
Actinobacteria_Actinobacteria_Kineosporiales	0.2881***	0.2858***	0.3604***	0.1269*	0.2455***	0.0059	-0.0798	-0.3377***	-0.2509***	0.0798	0.4152***	0.4087***
Actinobacteria_Actinobacteria_Micrococcales	-0.2355***	-0.3912***	-0.3454***	-0.0309	-0.3837***	0.0667	0.1747**	0.2691***	0.4248***	-0.375***	-0.0961	-0.1451*
Actinobacteria_Actinobacteria_Micromonosporales	-0.0945	-0.1878**	-0.0947	-0.0393	-0.2211***	-0.0778	0.1479*	0.1295*	0.0399	0.046	-0.1205.	-0.1099.
Actinobacteria_Actinobacteria_NA	-0.014	0.0037	0.0021	-0.0699	0.0188	0.0598	-0.0158	-0.0533	-0.015	0.0055	0.0119	-0.0423
Actinobacteria_Actinobacteria_PeM15	0.2003**	0.0803	0.0698	0.1073.	0.1491*	0.0683	-0.0242	0.1481*	-0.1445*	0.219***	-0.0817	-0.0689
Actinobacteria_Actinobacteria_Propionibacteriales	0.0725	-0.2527***	-0.1664**	0.2238***	-0.2991***	0.0142	0.2168***	0.3616***	0.2881***	-0.2538***	0.0467	0.107.
Actinobacteria_Actinobacteria_Pseudonocardiales	0.0598	-0.0263	-0.0167	0.0173	-0.0773	0.0485	0.1515*	0.0498	-0.073	0.1234.	0.0238	0.006
Actinobacteria_Actinobacteria_Streptomycetales	-0.0877	-0.1231.	-0.0456	-0.0731	-0.1678**	-0.2301***	0.0691	-0.1085.	0.0926	-0.0265	0.0584	0.1125.
Actinobacteria_Actinobacteria_Streptosporangiales	-0.0054	-0.0553	-0.1611*	0.0951	-0.214***	-0.0536	0.1984**	0.2197***	0.0392	0.0768	-0.1348*	-0.1455*
Actinobacteria_Coriobacteriia_CG2-30-50-142	-0.2709***	-0.2605***	-0.2813***	-0.1752**	-0.2105***	0.0087	-0.0189	0.1043.	0.2483***	-0.1386*	-0.233***	-0.2633***
Actinobacteria_Coriobacteriia_Coriobacteriales	-0.0846	-0.0508	-0.0169	0.0664	-0.0065	-0.0664	-0.082	-0.0916	0.0716	-0.0742	-0.0977	-0.1042.
Actinobacteria_Coriobacteriia_FS118-23B-02	-0.393***	-0.3336***	-0.5421***	-0.0837	-0.3473***	-0.1899**	0.1394*	0.1847**	0.3899***	-0.1318*	-0.4066***	-0.4292***
Actinobacteria_Coriobacteriia_NA	-0.2405***	-0.1624**	-0.2655***	-0.1168.	-0.2797***	-0.1556*	0.1387*	0.033	0.1739**	-0.0574	-0.1886**	-0.2205***
Actinobacteria_Coriobacteriia_OPB41	0.1119.	0.2189***	4e-04	0.3679***	-0.0687	-0.2065***	0.1823**	-0.0669	0.0134	0.0095	0.2271***	0.2928***
Actinobacteria_FFCH16263_uncultured bacterium	0.0654	0.0668	0.0729	0.0334	0.1528*	0.0804	-0.1657**	-0.037	-0.0407	-0.0065	0.0017	0.0022
Actinobacteria_KIST-JJY010_uncultured bacterium	0.0738	0.0796	0.1291*	-0.0137	0.0904	0.0146	-0.0855	-0.0631	-0.1261*	0.126*	0.0428	0.052
Actinobacteria_MB-A2-108_Actinobacteria bacterium RBG_19FT_COMBO_70_19	-0.0662	-0.3643***	-0.1956**	0.0723	-0.1681**	0.1435*	-0.114.	0.5499***	0.3426***	-0.3879***	-0.4045***	-0.3186***
Actinobacteria_MB-A2-108_metagenome	0.0877	0.1075.	0.143*	-0.0023	0.0802	-0.0824	-0.0778	-0.0917	-0.1204.	0.1186.	0.0605	0.1042.
Actinobacteria_MB-A2-108_NA	-0.2987***	-0.4958***	-0.469***	-0.2514***	-0.3682***	-0.1046.	0.1362*	0.279***	0.3561***	-0.1699**	-0.3515***	-0.3345***
Actinobacteria_MB-A2-108_uncultured actinobacterium	0.1055.	0.0742	-0.0039	0.0977	0.056	0.1055.	0.0247	0.1034	-0.0508	0.1055.	-0.0534	-0.0821
Actinobacteria_MB-A2-108_uncultured Actinomycetales bacterium	0.0143	0.0221	0.0508	-0.0586	0.0456	-0.0195	0.0664	-0.0353	-0.0742	0.0977	0.0482	0.0495
Actinobacteria_MB-A2-108_uncultured alpha proteobacterium	-0.0334	-0.1491*	-0.0881	-0.0729	-0.0389	0.0548	0.0409	0.1467*	0.0794	-0.086	-0.148*	-0.1558*
Actinobacteria_MB-A2-108_uncultured bacterium	-0.0623	0.0462	0.0555	-0.134*	-0.0765	-0.1379*	0.055	-0.1705**	-0.1315*	0.2081***	0.0827	0.0671
Actinobacteria_MB-A2-108_uncultured Catenulispora sp.	0.0213	-0.0875	-0.0102	-0.0147	-0.0139	0.0746	-0.0156	0.1371*	0.0542	-0.0393	-0.0599	-0.0494
Actinobacteria_MB-A2-108_uncultured Catenuloplanes sp.	0.0035	-0.0255	0.0245	0.028	0.032	0.0248	-0.091	0.0552	-0.0246	0.0171	-0.0918	-0.051
Actinobacteria_MB-A2-108_uncultured Micromonospora sp.	-0.1751**	-0.0077	-0.2258***	-0.06	-0.2716***	-0.265***	0.2632***	0.0087	0.0604	0.126*	-0.0471	-0.0584
Actinobacteria_MB-A2-108_uncultured Nocardioidaceae bacterium	0.0301	-0.0187	0.0235	0.1229.	0.0236	-0.0234	-0.0048	0.022	0.0215	-0.0639	-0.0152	-0.0021
Actinobacteria_MB-A2-108_uncultured soil bacterium	0.1097.	-0.0382	-0.0109	0.292***	-0.0398	0.1294*	0.0075	0.2773***	0.0483	-0.061	-0.1383*	-0.1205.
Actinobacteria_MB-A2-108_uncultured Streptomyces sp.	-0.0173	-0.0156	0.0586	-0.08	0.0846	0.1459*	-0.2118***	0.0446	0.0268	-0.0817	-0.0376	-0.0385
Actinobacteria_NA_NA	-0.2251***	-0.0393	-0.249***	-0.1679**	-0.3184***	-0.2689***	0.2968***	-0.0271	0.0349	0.1291*	-0.0962	-0.1223.
Actinobacteria_RBG-16-55-12_Actinobacteria bacterium GWC2_53_9	0.1834**	0.1291*	-0.0068	0.1698**	0.0974	0.1834**	0.043	0.1798**	-0.0883	0.1834**	-0.0928	-0.1427*
Actinobacteria_RBG-16-55-12_Actinobacteria bacterium RBG_16_55_12	-0.0117	0.0508	0.0352	0.0169	-0.0378	-0.0013	0.0482	-0.0079	0.0143	-0.0404	0.0742	0.0951
Actinobacteria_RBG-16-55-12_uncultured actinomycete	0.043	0.0104	0.0091	0.0872	0.0013	-0.0326	0.0404	-0.0079	0.0299	-0.0534	0.0977	0.1055.
Actinobacteria_RBG-16-55-12_uncultured bacterium	-0.1516*	-0.1041.	-0.1617*	-0.0962	-0.1586*	-0.1849**	0.09	0.0188	0.1173.	-0.0502	-0.0453	-0.0409
Actinobacteria_Thermoleophilia_Gaiellales	-0.5261***	-0.4948***	-0.5015***	-0.4462***	-0.5559***	-0.3984***	0.2695***	-0.0217	0.3299***	-0.0495	-0.1999**	-0.1582*
Actinobacteria_Thermoleophilia_NA	-0.1011	-0.0103	-0.126*	-0.0296	-0.2086***	-0.2339***	0.17**	-0.0507	0.0452	0.0711	0.0177	0.0186
Actinobacteria_Thermoleophilia_Solirubrobacterales	-0.1509*	0.1201.	-0.0337	-0.346***	-0.2956***	-0.3735***	0.4022***	-0.3299***	-0.1981**	0.3455***	0.278***	0.2652***
Actinobacteria_Thermoleophilia_uncultured	0.043	0.0286	-0.0564	0.0353	-0.0012	0.0639	0.0908	0.0928	-0.0174	0.0976	-0.0588	-0.0972
Actinobacteria_WCHB1-81_uncultured actinobacterium	0.01	-0.0273	-0.0158	0.0253	-0.0218	-0.058	0.0476	0.0057	0.0402	-0.0569	0.0191	0.0492
Actinobacteria_WCHB1-81_uncultured bacterium	0.1549*	0.1109.	0.1149.	0.1589*	0.0666	0.0771	-0.0129	-0.0076	-0.0624	0.0313	0.0884	0.0546
Actinobacteria_WCHB1-81_uncultured eubacterium WCHB1-81	0.0651	0.0296	-0.0339	0.0479	0.0687	0.1274*	-0.0521	0.0864	0.0011	0.048	-0.0887	-0.0957
Armatimonadetes_Armatimonadia_Armatimonadales	-0.1383*	-0.162*	-0.001	-0.1103.	-0.1309*	0.0284	-0.0869	-0.0302	0.1138.	-0.1403*	-0.085	-0.1068.
Armatimonadetes_Chthonomonadetes_Chthonomonadales	-0.1457*	-0.0629	0.1142.	-0.2651***	-0.0238	-3e-04	-0.1345*	-0.1686**	-0.0911	0.0286	-0.0665	-0.0694
Armatimonadetes_DG-56_NA	0.0129	-0.0093	0.0183	-0.0433	0.0098	-0.067	-0.0518	0.0215	0.0148	-0.0017	0.0036	0.0184
Armatimonadetes_DG-56_uncultured Actinomycetales bacterium	0.0554	0.0405	0.0571	-0.0082	0.0678	-5e-04	-0.0902	-0.031	-0.0344	0.0374	0.0112	0.0549
Armatimonadetes_DG-56_uncultured bacterium	0.3314***	0.2899***	0.3324***	0.0882	0.2882***	0.1331*	-0.0456	-0.0573	-0.344***	0.2371***	0.1949**	0.1651**
Armatimonadetes_DG-56_uncultured bacterium UASB_TL26	-0.0773	-0.0674	-0.0107	-0.0459	0.007	0.0088	-0.0029	0.0117	0.0247	-0.0154	-0.0284	-0.0255
Armatimonadetes_DG-56_uncultured soil bacterium	0.1055.	0.0742	-0.0039	0.0977	0.056	0.1055.	0.0247	0.1034	-0.0508	0.1055.	-0.0534	-0.0821
Armatimonadetes_Fimbriimonadia_Fimbriimonadales	-0.179**	-0.1868**	-0.0123	-0.2096***	-0.1719**	-0.0621	0.0628	0.0347	-0.052	0.1112.	-0.176**	-0.1698**
Armatimonadetes_NA_NA	0.0384	0.0384	0.0046	0.14*	0.0262	0.0722	0.0413	0.102	-0.061	0.079	-0.0923	-0.1142.
Armatimonadetes_uncultured bacterium_uncultured bacterium	-0.2386***	-0.1632**	-0.1302*	-0.1861**	-0.163**	-0.0742	0.0123	-0.0468	0.135*	-0.0931	-0.1306*	-0.1156.
Armatimonadetes_uncultured_candidate division OP10 clone OPB50	0.0087	0.0926	0.0107	0.022	0.005	-0.0757	0.1216.	-0.051	-0.0745	0.0816	0.0883	0.0782
Armatimonadetes_uncultured_metagenome	-0.134*	-0.0394	-0.2279***	0.0169	-0.252***	-0.1334*	0.2296***	0.1217.	0.1012	0.0484	-0.1724**	-0.1997**
Armatimonadetes_uncultured_NA	-0.0338	-0.0338	0.0202	-0.0641	-0.0179	0.0353	0.0355	0.0117	-0.051	0.0886	-0.0089	-0.0296
Armatimonadetes_uncultured_uncultured actinobacterium	-0.0295	-0.1288*	-0.1215.	-0.046	-0.0989	0.0409	0.1426*	0.226***	0.0562	0.0149	-0.1692**	-0.1892**
Armatimonadetes_uncultured_uncultured Armatimonadetes bacterium	-0.0132	-0.0067	0.0069	0.0849	-0.048	-0.1247*	-0.0365	-0.1352*	0.067	-0.0695	0.0338	0.0218
Armatimonadetes_uncultured_uncultured bacterium	0.118.	0.1628**	0.2013**	0.0357	0.0084	0.0505	0.0094	-0.1265*	-0.1127.	0.0101	0.1581*	0.1473*
Armatimonadetes_uncultured_uncultured bacterium SJA-121	-0.0234	-0.0062	-0.0905	0.017	-0.0705	-0.0313	-0.0172	-0.0238	0.0968	-0.108.	0.0208	-0.0132
Armatimonadetes_uncultured_uncultured bacterium SJA-171	-0.0299	-0.0664	-0.0247	-0.0065	-0.0195	-0.0065	-0.0091	0.089	0.0221	-0.0299	-0.0898	-0.0664
Armatimonadetes_uncultured_uncultured bacterium SJA-176	0.065	0.0309	0.0251	0.0506	-0.019	0.0017	0.0543	-0.0469	0.0164	-0.0521	0.086	0.0471
Armatimonadetes_uncultured_uncultured Chloroflexi bacterium	-0.1752**	-0.1605*	-0.1434*	-0.1401*	-0.1882**	-0.1084.	0.0855	0.1046.	0.1113.	-0.0505	-0.1611*	-0.1474*
Armatimonadetes_uncultured_uncultured Firmicutes bacterium	-0.0241	-0.0775	-0.0074	-0.0654	-0.082	0.0067	-0.0161	0.1029	-0.0083	0.0449	-0.1383*	-0.1417*
Armatimonadetes_uncultured_uncultured soil bacterium	0.1268*	0.0937	0.1381*	0.106.	0.0268	0.0915	0.0537	-3e-04	-0.101	-0.0032	0.123.	0.1083.
Atribacteria_JS1_NA	0.1108.	0.0298	0.0629	0.0683	0.0962	-0.0386	-0.0575	0.0741	-0.0518	0.0445	0.009	0.0644
Bacteroidetes_Bacteroidia_Bacteroidales	0.4479***	0.41***	0.3654***	0.464***	0.3945***	0.2025**	-0.1239*	-0.0167	-0.2266***	0.024	0.3147***	0.3655***
Bacteroidetes_Bacteroidia_Bacteroidetes VC2.1 Bac22	-0.0273	-0.0592	-0.1706**	0.0058	-0.2095***	-0.1082.	0.2406***	0.1006	0.0342	0.1171.	-0.0345	-0.0825
Bacteroidetes_Bacteroidia_Chitinophagales	0.0836	-0.2527***	-0.0394	0.249***	-0.1549*	0.1301*	0.1697**	0.3135***	0.1757**	-0.2134***	0.0624	0.0778
Bacteroidetes_Bacteroidia_Cytophagales	0.1565*	-0.066	0.0931	0.1647**	0.0213	0.2175***	0.0436	0.1508*	-0.0433	0.0488	-0.0302	-0.0805
Bacteroidetes_Bacteroidia_Flavobacteriales	0.224***	-0.0154	0.0075	0.3293***	0.0836	0.3624***	0.0801	0.3163***	0.0169	-0.0549	-0.0044	-0.118.
Bacteroidetes_Bacteroidia_NA	-0.1121.	-0.2094***	-0.2128***	-0.1114.	-0.1045.	0.0047	0.0604	0.1911**	0.1974**	-0.1969**	-0.1134.	-0.114.
Bacteroidetes_Bacteroidia_SM1A07	0.0326	-0.0331	-0.0637	0.0321	-0.041	0.0174	0.0786	0.0753	0.0123	0.0373	-0.0227	-0.0387
Bacteroidetes_Bacteroidia_Sphingobacteriales	0.0354	0.117.	-0.0343	0.2127***	-0.2935***	-0.2889***	0.4115***	-0.2246***	-0.0321	0.147*	0.2898***	0.2273***
Bacteroidetes_Ignavibacteria_Ignavibacteriales	-0.0891	-0.1684**	-0.1868**	0.1747**	-0.1174.	-0.1005	-0.023	0.2047**	0.3128***	-0.2968***	-0.0702	0.0378
Bacteroidetes_Ignavibacteria_Kryptoniales	-0.1268*	-8e-04	-0.235***	-0.0031	-0.0261	-0.2415***	0.0751	0.1311*	0.0501	0.1257*	-0.2373***	-0.2084***
Bacteroidetes_Ignavibacteria_NA	-0.0489	-0.009	0.0305	-0.0862	0.0192	-0.0052	-0.0497	-0.1675**	-0.0131	-0.03	0.0716	0.0511
Bacteroidetes_Ignavibacteria_OPB56	-0.2242***	-0.12.	-0.0941	-0.2652***	-0.1742**	0.0131	0.0783	-0.0282	0.0335	0.0097	-0.1024	-0.1234.
Bacteroidetes_Ignavibacteria_SJA-28	0.0124	-0.0101	0.0998	-0.0663	0.2588***	0.2543***	-0.2827***	0.1571*	-0.0718	-0.0404	-0.1828**	-0.1442*
Bacteroidetes_Rhodothermia_Rhodothermales	0.1055.	0.0742	-0.0039	0.0977	0.056	0.1055.	0.0247	0.1034	-0.0508	0.1055.	-0.0534	-0.0821
BRC1_metagenome_metagenome	0.1576*	0.1209.	0.1769**	0.054	0.1629**	0.0798	-0.1477*	-0.0525	-0.1118.	0.031	0.0694	0.0655
BRC1_NA_NA	0.1024	0.0987	0.1541*	-0.005	0.1038	0.0653	-0.0385	-0.1485*	-0.0788	0.0375	0.1911**	0.1859**
BRC1_Omnitrophica bacterium OLB16_Omnitrophica bacterium OLB16	-0.0405	-0.0342	0.0134	-0.0116	-0.0966	-0.0455	0.0277	0.0145	0.0045	0.0176	0.0045	0.0053
BRC1_soil bacterium WWH121_soil bacterium WWH121	-0.0716	0.0326	-0.0586	-0.0716	-0.1003	-0.0794	0.0898	-0.0916	-0.0143	0.0664	-0.0039	-0.0195
BRC1_uncultured bacterium_uncultured bacterium	0.0091	0.0027	-0.0137	0.0961	0.0116	-0.0164	-0.0162	0.0239	0.0433	-0.0486	0.0071	0.0053
BRC1_uncultured candidate division BRC1 bacterium_uncultured candidate division BRC1 bacterium	0.0824	0.1236.	0.1108.	0.0456	0.0685	0.0096	0.0581	-0.0394	-0.0692	-0.0046	0.1553*	0.1706**
BRC1_uncultured deep-sea bacterium_uncultured deep-sea bacterium	0.0463	-0.0645	-0.0039	0.015	-0.0146	0.0813	0.0206	0.1085.	-0.0259	0.0205	-0.0561	-0.0737
BRC1_uncultured delta proteobacterium_uncultured delta proteobacterium	0.0708	0.1241*	0.0551	-0.0402	0.0694	0.1051.	-0.0148	-0.0299	-0.0784	0.0378	0.0539	-0.0062
BRC1_uncultured organism_uncultured organism	-0.1718**	-0.1026	-0.1915**	-0.1094.	-0.192**	-0.1437*	0.0956	-0.0196	0.1391*	-0.0841	-0.0739	-0.085
BRC1_uncultured soil bacterium PBS-74_uncultured soil bacterium PBS-74	0.0472	0.0633	0.1005	0.0601	-0.0096	0.0286	-0.0424	-0.0184	-0.0807	0.0672	0.0295	0.0417
BRC1_uncultured soil bacterium PBS-II-1_uncultured soil bacterium PBS-II-1	0.0203	0.1087.	0.1163.	0.0894	0.1092.	0.0049	-0.1124.	-0.146*	-0.0705	0.0489	-0.0346	-0.0314
BRC1_uncultured soil bacterium PBS-II-34_uncultured soil bacterium PBS-II-34	0.0679	0.1235.	0.1345*	0.0442	0.0541	-0.0354	-0.0162	-0.1171.	-0.1346*	0.1263*	0.1237*	0.1208.
BRC1_uncultured soil bacterium PBS-II-4_uncultured soil bacterium PBS-II-4	-0.0038	0.0265	-0.003	0.0095	-0.0554	-0.1057.	0.0799	-0.0574	-0.0405	0.0778	0.076	0.0756
BRC1_uncultured soil bacterium PBS-III-18_uncultured soil bacterium PBS-III-18	0.0585	0.1006	0.0611	-0.042	0.0448	0.0506	0.0639	-0.0661	-0.0866	0.0483	0.1053.	0.0537
BRC1_uncultured soil bacterium PBS-III-24_uncultured soil bacterium PBS-III-24	-0.0247	-0.0195	0.0586	-0.0898	-0.0273	-0.0404	-0.0534	-0.0916	-0.0586	0.0898	0.0195	0.0274
BRC1_uncultured soil bacterium PBS-III-29_uncultured soil bacterium PBS-III-29	0.0722	0.0493	0.0916	0.0064	0.0708	0.0609	0.0541	0.0113	-0.1075.	0.1022	-0.0081	-0.0258
BRC1_uncultured soil bacterium PBS-III-4_uncultured soil bacterium PBS-III-4	0.0256	-0.0521	0.0567	0.1096.	0.0556	0.0081	-0.1378*	0.0878	0.0301	-0.0424	-0.1308*	-0.0891
BRC1_uncultured soil bacterium PRR-11_uncultured soil bacterium PRR-11	-0.0601	-0.0298	-0.0767	0.0147	-0.1667**	-0.154*	0.0699	-0.0362	0.1317*	-0.1044.	0.0731	0.0707
BRC1_uncultured soil bacterium_uncultured soil bacterium	-0.0645	-0.0355	0.0037	0.0172	-0.1151.	-0.0518	-0.0365	-0.0965	0.0515	-0.0321	0.0017	-0.0361
Calditrichaeota_Calditrichia_Calditrichales	-0.0931	-0.0356	-0.0262	0.0106	-0.0012	-0.0068	-0.0941	-0.0801	0.0897	-0.1012	-0.0438	-0.0509
Chlamydiae_Chlamydiae_Chlamydiales	-0.215***	-0.0954	-0.2466***	-0.0394	-0.089	-0.1437*	0.0656	0.0368	0.097	0.1361*	-0.273***	-0.3064***
Chlamydiae_LD1-PA32_NA	8e-04	0.0072	0.0658	-0.0401	-0.0215	0.0081	0.0405	0.026	-0.0358	0.0239	0.0337	0.0413
Chlamydiae_LD1-PA32_uncultured bacterium	0.1018	0.1084.	0.1255*	0.0352	0.0986	0.0181	-0.099	-0.0573	-0.0701	0.0477	0.0794	0.0818
Chlamydiae_LD1-PA32_uncultured Clostridiales bacterium	-0.0673	0.044	-0.0436	-0.0937	-0.0315	-0.004	0.0411	-0.059	-0.003	0.0383	5e-04	-0.0245
Chlamydiae_LD1-PA32_uncultured microorganism	0.1384*	0.0941	0.1052.	0.0793	0.1495*	0.0092	-0.1384*	0.0575	-0.0941	0.1052.	-0.0387	0.0055
Chloroflexi_AD3_NA	-0.2112***	0.0506	-0.0808	-0.3113***	-0.2014**	-0.2501***	0.193**	-0.2924***	-0.0811	0.1994**	0.035	-0.0103
Chloroflexi_AD3_uncultured Chloroflexi bacterium	-0.0742	9e-04	-0.0545	0.0556	-0.0808	-0.0947	0.0418	-0.0267	0.058	-9e-04	0.0149	0.0211
Chloroflexi_AD3_uncultured Clostridium sp.	-0.2843***	0.0531	-0.2764***	-0.2132***	-0.3692***	-0.3508***	0.3416***	-0.1441*	0.0316	0.1838**	-0.0663	-0.0878
Chloroflexi_AD3_uncultured forest soil bacterium	-0.1576*	-0.0279	-0.1267*	-0.1441*	-0.1487*	-0.0731	0.0913	-0.061	0.0505	0.0144	-0.058	-0.0658
Chloroflexi_AD3_uncultured soil bacterium	-0.1634**	-0.0422	-0.123.	-0.2156***	-0.1818**	-0.1282*	0.1178.	-0.1398*	-0.0326	0.1638**	-0.0467	-0.0571
Chloroflexi_AD3_uncultured Thermoflavimicrobium sp.	-0.2881***	0.1037	-0.1312*	-0.4131***	-0.1643**	-0.2667***	0.2703***	-0.3823***	-0.176**	0.33***	0.0633	-0.0469
Chloroflexi_AD3_uncultured Thermomicrobia bacterium	0.1216.	0.1788**	0.1729**	-0.0504	0.1547*	0.0674	-0.0448	-0.1024	-0.1637**	0.0293	0.1233.	0.0824
Chloroflexi_Anaerolineae_1-20	0.0368	-0.0069	-0.0326	0.0553	-0.0334	0.0364	0.0078	0.0226	0.0702	-0.0588	0.03	0.0066
Chloroflexi_Anaerolineae_ADurb.Bin180	-0.1184.	-0.0364	-0.0444	0.1243*	-0.0659	0.0149	-0.1493*	-0.0243	0.1534*	-0.1617*	-0.1094.	-0.0962
Chloroflexi_Anaerolineae_Anaerolineales	0.4222***	0.4174***	0.4958***	0.2879***	0.578***	0.5027***	-0.4782***	-0.0933	-0.2216***	-0.1244*	0.2286***	0.1978**
Chloroflexi_Anaerolineae_Ardenticatenales	0.0728	-0.1153.	-0.0382	0.1991**	-0.0635	0.2361***	0.03	0.4465***	0.081	-0.0727	-0.2744***	-0.2849***
Chloroflexi_Anaerolineae_C10-SB1A	-0.1734**	-0.1234.	-0.1421*	-0.1657**	-0.2278***	-0.1995**	0.1405*	0.0189	0.0401	0.0684	-0.1059.	-0.1103.
Chloroflexi_Anaerolineae_Caldilineales	-0.0385	-0.3371***	-0.2245***	0.1662**	-0.1982**	-0.0639	0.0492	0.1287*	0.3699***	-0.2851***	0.0171	0.0754
Chloroflexi_Anaerolineae_KZNMV-5-B42	-0.0169	-0.0729	-0.0378	0.0716	-0.0143	-0.0143	-0.0039	0.0785	0.0352	-0.0352	-0.0651	-0.0534
Chloroflexi_Anaerolineae_MSB-5E12	-0.0539	-0.0076	-0.0383	-0.0117	-0.0579	-0.059	0.0312	-0.0041	0.0676	-0.0564	0.0066	-0.0088
Chloroflexi_Anaerolineae_NA	-0.1769**	-0.1705**	-0.2103***	-0.0905	-0.1691**	-0.1313*	-0.0202	-0.0529	0.2099***	-0.1045.	-0.0789	-0.0833
Chloroflexi_Anaerolineae_RBG-13-54-9	-0.333***	-0.1552*	-0.0797	-0.3693***	0.0453	0.1122.	-0.3991***	0.0277	0.1516*	-0.26***	-0.3298***	-0.3463***
Chloroflexi_Anaerolineae_SBR1031	0.2441***	0.2069***	0.2779***	0.1393*	0.0943	0.3696***	-0.019	0.1367*	-0.1995**	0.141*	0.0622	-0.0326
Chloroflexi_Anaerolineae_SJA-15	0.0696	-0.0632	-0.0376	0.0575	0.0944	-0.0366	-0.2014**	-0.043	0.1972**	-0.2778***	0.1554*	0.2764***
Chloroflexi_Anaerolineae_uncultured	0.1893**	0.0803	0.1018	0.1828**	0.1299*	-0.0464	-0.119.	-0.0649	-0.0116	-0.0216	0.1222.	0.1967**
Chloroflexi_Anaerolineae_uncultured Bellilinea sp.	-0.0865	-0.1231.	0.2251***	-0.2181***	0.2782***	0.3701***	-0.5759***	0.1412*	-0.0444	-0.175**	-0.3558***	-0.3315***
Chloroflexi_Chloroflexia_Chloroflexales	-0.1607*	-0.4132***	-0.2527***	-0.0648	-0.3133***	0.0616	0.1084.	0.4944***	0.2426***	-0.1089.	-0.394***	-0.371***
Chloroflexi_Chloroflexia_Elev-1554	-0.0519	-0.02	-0.0224	-0.0702	-0.1035	-0.0317	0.0317	-0.0024	-0.0111	0.0353	-0.0487	-0.0663
Chloroflexi_Chloroflexia_Kallotenuales	-0.1555*	-0.1678**	-0.1329*	-0.2118***	-0.2622***	-0.0195	0.0844	0.0308	0.0739	0.006	-0.1098.	-0.1418*
Chloroflexi_Chloroflexia_Thermomicrobiales	-0.0188	-0.2094***	-0.0714	0.1167.	-0.1895**	0.1469*	0.0232	0.2467***	0.1803**	-0.2143***	-0.1411*	-0.1476*
Chloroflexi_Dehalococcoidia_661239	0.1138.	-0.0383	0.1627**	-0.1409*	0.155*	0.013	-0.1387*	-0.0255	-0.1071.	-0.0042	0.1037	0.1662**
Chloroflexi_Dehalococcoidia_Dehalococcoidales	0.0983	0.0231	0.024	0.1809**	0.023	0.016	0.0123	0.0464	0.0056	-0.0344	0.0275	0.011
Chloroflexi_Dehalococcoidia_DscP2	0.0718	0.0847	0.1087.	-0.0499	0.0977	0.033	0.0022	-0.0667	-0.1107.	0.0667	0.1087.	0.0821
Chloroflexi_Dehalococcoidia_ER-E4-17	0.0221	0.0013	0.0195	0.0247	-0.0534	-0.0482	-0.0326	-0.0589	0.0612	-0.0664	0.0898	0.0795
Chloroflexi_Dehalococcoidia_FW22	0.0706	0.0206	0.0761	0.1434*	0.0322	-0.0247	-0.0145	-0.1071.	0.0164	-0.0426	0.1047.	0.1018
Chloroflexi_Dehalococcoidia_GIF3	0.0996	0.1435*	0.0768	0.1561*	-0.0148	-0.099	0.0653	-0.072	-0.109.	0.1622**	0.0914	0.1023
Chloroflexi_Dehalococcoidia_GIF9	0.1206.	0.2145***	0.1285*	0.0428	0.045	-0.0687	0.0906	-0.1683**	-0.1753**	0.1984**	0.1879**	0.1733**
Chloroflexi_Dehalococcoidia_JdFR-54	0.0118	-0.0354	-0.023	-0.0459	0.0393	0.0445	-0.1074.	0.0904	0.0354	-0.0288	-0.1193.	-0.0937
Chloroflexi_Dehalococcoidia_MSBL5	0.1321*	0.1242*	0.195**	-0.0564	0.1035	1e-04	-0.0389	-0.1017	-0.1612*	0.082	0.1736**	0.1473*
Chloroflexi_Dehalococcoidia_NA	0.2669***	0.272***	0.302***	-0.0184	0.1399*	0.0207	-0.09	-0.1881**	-0.2407***	0.1604*	0.3043***	0.2963***
Chloroflexi_Dehalococcoidia_RBG-13-46-9	0.2709***	0.145*	0.2272***	0.1848**	0.2512***	0.0446	-0.172**	-0.1106.	-0.0463	-0.1129.	0.2834***	0.3022***
Chloroflexi_Dehalococcoidia_S085	-0.2741***	-0.315***	-0.493***	-0.2131***	-0.3527***	-0.302***	0.3157***	0.1435*	0.2805***	-0.0128	-0.1369*	-0.1111.
Chloroflexi_Dehalococcoidia_SAR202 clade	0.1339*	0.1186.	0.0862	-0.0088	0.1108.	0.1027	0.0805	-0.0572	-0.1509*	0.1456*	0.1151.	0.0655
Chloroflexi_Dehalococcoidia_Sh765B-AG-111	0.055	-0.0133	0.0329	0.0052	0.0624	-0.0019	-0.0606	0.1059.	-0.0126	0.0107	-0.0925	-0.0649
Chloroflexi_Dehalococcoidia_Sh765B-TzT-20	0.0491	0.0284	0.042	0.0185	-0.0078	0.0676	-0.0349	-0.0074	-0.0279	-0.0023	0.0263	0.0022
Chloroflexi_Dehalococcoidia_SPG12-343-353-B75	-0.0851	-0.0833	-0.0216	-0.1329*	-0.0684	0.0058	-0.0497	-0.0582	0.0281	-0.0079	-0.039	-0.0446
Chloroflexi_Dehalococcoidia_t0.6.f	0.0732	0.0615	0.097	-0.0109	0.016	-0.0249	-0.0308	-0.1065.	-0.0176	-0.0188	0.1674**	0.1381*
Chloroflexi_Dehalococcoidia_vadinBA26	0.0078	-0.0462	-0.0193	0.0672	-0.04	-0.0043	-0.0139	0.1152.	0.0597	-0.0935	-0.0079	0.0345
Chloroflexi_Gitt-GS-136_NA	-0.1529*	-0.3561***	-0.3467***	0.0966	-0.2584***	0.0368	0.0918	0.5864***	0.2878***	-0.22***	-0.5129***	-0.4647***
Chloroflexi_Gitt-GS-136_uncultured bacterium	0.0143	0.0221	0.0508	-0.0586	0.0456	-0.0195	0.0664	-0.0353	-0.0742	0.0977	0.0482	0.0495
Chloroflexi_Gitt-GS-136_uncultured Caldilinea sp.	-0.0668	-0.099	-0.0184	-0.1238*	0.0887	0.2022**	-0.1608*	0.0463	0.0766	-0.1075.	-0.0249	-0.0246
Chloroflexi_Gitt-GS-136_uncultured Chloroflexi bacterium	0.1055.	0.0742	-0.0039	0.0977	0.056	0.1055.	0.0247	0.1034	-0.0508	0.1055.	-0.0534	-0.0821
Chloroflexi_JG30-KF-CM66_metagenome	0.1686**	0.0551	0.0945	0.0529	0.086	0.2604***	0.0785	0.1678**	-0.1217.	0.0706	0.0059	-0.0737
Chloroflexi_JG30-KF-CM66_NA	0.0232	0.0272	0.2386***	-0.1947**	0.4104***	0.4012***	-0.4968***	-0.0477	-0.1282*	-0.1291*	-0.1713**	-0.2479***
Chloroflexi_JG30-KF-CM66_uncultured Anaerolineales bacterium	0.0144	0.0396	-0.0063	0.0641	-0.1056.	-0.0713	0.08	0.0306	0.0158	0.0029	0.0366	0.0271
Chloroflexi_JG30-KF-CM66_uncultured Armatimonadetes bacterium	-0.1959**	-0.0706	-0.3505***	-0.0084	-0.3609***	-0.3755***	0.3649***	0.0985	0.1503*	0.1149.	-0.0745	-0.0652
Chloroflexi_JG30-KF-CM66_uncultured bacterium	0.184**	0.3078***	0.2509***	-0.0882	0.1498*	0.1812**	0.0296	-0.1904**	-0.3265***	0.2255***	0.194**	0.0959
Chloroflexi_JG30-KF-CM66_uncultured Caldilinea sp.	-0.0952	0.1465*	-0.0712	-0.2095***	-0.1721**	-0.1654**	0.2283***	-0.2077***	-0.1712**	0.2803***	0.0732	0.0335
Chloroflexi_JG30-KF-CM66_uncultured soil bacterium	0.2075***	0.1798**	0.143*	0.0938	0.1703**	0.1535*	0.0077	-0.0354	-0.2065***	0.1535*	0.0986	0.0537
Chloroflexi_KD4-96_bacterium Ellin6529	0.0099	-0.041	0.055	-0.0171	-0.0416	-0.0215	-0.0339	-0.0052	-0.0171	0.0108	0.0298	0.0335
Chloroflexi_KD4-96_metagenome	-0.0794	-0.275***	-0.1206.	0.0834	-0.0461	0.0072	-0.0883	0.288***	0.2186***	-0.2338***	-0.2562***	-0.1724**
Chloroflexi_KD4-96_NA	-0.2343***	-0.0104	-0.1882**	-0.2108***	-0.2946***	-0.4213***	0.2149***	-0.1678**	0.0477	0.1133.	0.0519	0.0745
Chloroflexi_KD4-96_uncultured Anaerolineaceae bacterium	-0.0474	-0.0209	0.0445	-0.1895**	0.2055**	0.1651**	-0.2288***	-0.1061.	-0.0126	-0.0364	0.0448	0.0426
Chloroflexi_KD4-96_uncultured bacterium	-0.1987**	-0.3212***	-0.4073***	-0.0535	-0.3877***	-0.1125.	0.2283***	0.3936***	0.3439***	-0.2058**	-0.2868***	-0.2014**
Chloroflexi_KD4-96_uncultured Chloroflexi bacterium	0.0381	0.0308	0.0872	0.1	0.1865**	0.1678**	-0.2502***	0.0306	0.0274	-0.1397*	-0.0786	-0.0787
Chloroflexi_KD4-96_uncultured Gram-positive bacterium	0.0677	0.0733	0.0293	0.0811	-0.0199	0.0329	0.0233	0.0218	0.014	-1e-04	0.0636	0.0528
Chloroflexi_KD4-96_uncultured Levilinea sp.	0.043	0.0104	0.0091	0.0872	0.0013	-0.0326	0.0404	-0.0079	0.0299	-0.0534	0.0977	0.1055.
Chloroflexi_KD4-96_uncultured Longilinea sp.	0.0587	-0.0909	-6e-04	0.0754	-0.015	-0.0501	-0.0179	0.0025	0.0701	-0.0919	0.0862	0.1219.
Chloroflexi_KD4-96_uncultured prokaryote	-0.0049	-0.0839	-0.1166.	0.0674	-0.0971	0.0541	0.0324	0.1921**	0.1025	-0.0378	-0.1606*	-0.131*
Chloroflexi_Ktedonobacteria_B12-WMSP1	-0.0808	0.1985**	0.0508	-0.1751**	-0.0868	-0.158*	0.1873**	-0.3064***	-0.2181***	0.2931***	0.1494*	0.122.
Chloroflexi_Ktedonobacteria_C0119	-0.2078***	-0.0505	0.0398	-0.303***	-0.1925**	-0.1365*	0.133*	-0.1798**	-0.098	0.1137.	0.0716	0.0533
Chloroflexi_Ktedonobacteria_Ktedonobacterales	0.1837**	0.4317***	0.4804***	-0.14*	0.279***	-0.0629	0.0406	-0.4743***	-0.6216***	0.538***	0.2941***	0.2071***
Chloroflexi_Ktedonobacteria_MVP-21	-0.0337	-0.0279	-0.0901	0.0807	-0.1319*	-0.1349*	0.1028	0.0019	0.0914	-0.0343	0.0434	0.0193
Chloroflexi_NA_NA	0.005	0.0167	0.08	-0.1016	0.0357	0.0492	-0.0828	-0.064	-0.0619	0.052	0.0204	-0.0037
Chloroflexi_NLS2-31_uncultured bacterium	0.0688	-0.0933	0.0656	0.0756	0.0609	0.1116.	-0.1971**	0.1383*	0.1091.	-0.2252***	0.0325	0.0774
Chloroflexi_OLB14_Chloroflexi bacterium OLB14	-0.1051.	-0.0979	-0.0647	-0.0078	0.0389	0.0041	-0.1329*	-0.0088	0.1163.	-0.1163.	-0.1273*	-0.1226.
Chloroflexi_OLB14_metagenome	-0.0826	0.0496	-0.006	-0.0497	-0.0619	-0.1429*	0.0265	-0.1692**	-0.023	0.0507	0.0236	-0.0354
Chloroflexi_OLB14_NA	0.1016	0.1204.	0.0669	0.0215	0.0841	-0.0793	-0.0652	-0.0662	-0.1262*	0.21***	0.0297	0.0711
Chloroflexi_OLB14_uncultured bacterium	-0.154*	-0.2856***	-0.0292	-0.1509*	0.1438*	0.2852***	-0.3334***	0.1183.	0.225***	-0.3352***	-0.1532*	-0.1044.
Chloroflexi_OLB14_uncultured Chloroflexi bacterium	0.117.	8e-04	0.0329	0.1964**	0.0713	0.1515*	-0.0589	0.1723**	0.0058	-0.0551	-0.0688	-0.0654
Chloroflexi_P2-11E_uncultured bacterium	0.0209	0.0644	0.0286	-0.0376	-0.0354	-0.021	0.0775	-0.053	-0.0181	-0.0493	0.1271*	0.0921
Chloroflexi_SHA-26_NA	-0.0773	0.0231	0.0141	-0.0654	-0.0124	-0.0093	0.0046	-0.0879	-0.0909	0.1635**	-0.04	-0.0612
Chloroflexi_SHA-26_uncultured Anaerolineaceae bacterium	-0.0935	-0.0904	-0.0947	-0.0851	-0.0744	0.0738	-0.0218	0.0056	0.1181.	-0.1285*	-0.0401	-0.0127
Chloroflexi_SHA-26_uncultured bacterium	-0.0647	0.0496	0.0679	-0.0651	-0.0263	-0.0602	-0.1215.	-0.2248***	-0.0171	0.0065	-0.0069	-0.0282
Chloroflexi_SHA-26_uncultured Chloroflexi bacterium	-0.0668	-0.0466	-0.0299	-0.0941	-0.1009	-0.0673	-0.0053	0.0756	0.0274	0.0176	-0.0759	-0.0303
Chloroflexi_SHA-26_uncultured Dehalococcoides sp.	-0.0206	-0.0336	-0.0436	0.014	-0.1379*	-0.0625	0.0961	-0.0065	0.0313	0.0152	0.0569	0.0464
Chloroflexi_SHA-26_uncultured Dehalogenimonas sp.	0.1222.	-0.0114	0.0547	0.0689	0.069	0.0318	-0.0763	0.0732	0.0387	-0.1965**	0.1032	0.1379*
Chloroflexi_SHA-26_uncultured soil bacterium	0.0337	-0.0386	-0.0014	0.0852	-0.0407	-0.0187	-0.0136	0.0594	0.0463	-0.0449	-0.0122	0.0161
Chloroflexi_TK10_bacterium Ellin6519	0.0917	0.0704	0.1257*	-0.0574	0.0772	0.0097	-0.0226	-0.1143.	-0.1607*	0.1371*	0.1015	0.069
Chloroflexi_TK10_bacterium Ellin6543	-0.1261*	0.0734	-0.0914	-0.0741	-0.1747**	-0.1501*	0.2095***	-0.0809	-0.0753	0.1714**	-0.1005	-0.1409*
Chloroflexi_TK10_Chloroflexi bacterium JEA33	0.0548	0.0083	0.0457	0.0182	0.0398	0.076	0.0091	-0.0618	-0.0708	0.0621	0.0186	-0.0279
Chloroflexi_TK10_Clostridiales bacterium PH28_bin88	0.0376	0.0032	0.0628	0.0215	0.0407	0.08	-0.1057.	0.0138	0.0016	-0.0247	-0.0106	-0.0431
Chloroflexi_TK10_NA	0.1179.	0.009	0.1129.	-0.0392	-0.0269	-0.0371	0.0692	0.1471*	-0.1332*	0.157*	-0.0181	-0.0249
Chloroflexi_TK10_uncultured bacterium	0.2101***	0.101	0.1354*	0.0333	0.0437	0.2473***	0.1492*	0.1839**	-0.2195***	0.1937**	0.019	-0.066
Chloroflexi_TK10_uncultured beta proteobacterium	0.0534	0.0898	0.0898	0.0091	0.0768	0.0586	0.0039	-0.0589	-0.0924	0.0534	0.082	0.0586
Chloroflexi_TK10_uncultured Chloroflexi bacterium	0.2336***	0.1867**	0.2462***	0.0665	0.2291***	0.0685	-0.0556	-0.0317	-0.2946***	0.2598***	0.0265	0.0293
Chloroflexi_TK10_uncultured Chloroflexus sp.	0.1405*	-0.127*	-0.0123	0.1996**	-0.0839	0.089	0.082	0.3487***	0.0182	-0.0068	-0.1099.	-0.0724
Chloroflexi_TK10_uncultured Dehalococcoidia bacterium	0.1193.	0.07	-0.005	0.0418	0.0263	0.0729	0.1539*	0.0191	-0.2081***	0.3439***	-0.0261	-0.0818
Chloroflexi_TK10_uncultured soil bacterium	-0.0467	-0.0458	-0.0611	-0.1025	-0.0902	-0.0287	0.1261*	0.0036	-0.0088	0.0332	-0.0111	-0.0594
CK-2C2-2_uncultured organism_uncultured organism	-0.0508	-0.0729	-0.0508	-0.043	0.0378	0.0977	-0.0898	0.0406	0.082	-0.0833	-0.043	-0.0534
Cloacimonetes_Cloacimonadia_Cloacimonadales	0.1307*	0.1749**	0.1602*	0.1514*	-0.0323	-0.0685	0.0788	-0.2329***	-0.0088	-0.1017	0.4057***	0.4313***
Cyanobacteria_Melainabacteria_Gastranaerophilales	0.0232	-0.0045	0.0214	0.1931**	-0.0343	0.1424*	-0.0268	0.0104	0.1136.	-0.1298*	-2e-04	-0.0726
Cyanobacteria_Melainabacteria_Obscuribacterales	-0.2986***	-0.053	-0.1992**	-0.2583***	-0.317***	-0.293***	0.2471***	-0.2601***	0.0335	0.1809**	-0.0424	-0.073
Cyanobacteria_Melainabacteria_Vampirovibrionales	-0.0453	-0.091	-0.0725	-0.0095	-0.0336	0.0706	-0.0341	0.037	0.1793**	-0.2065***	0.0557	0.0528
Cyanobacteria_Oxyphotobacteria_Gloeobacterales	-0.0846	-0.0508	-0.0169	0.0664	-0.0065	-0.0664	-0.082	-0.0916	0.0716	-0.0742	-0.0977	-0.1042.
Cyanobacteria_Oxyphotobacteria_Leptolyngbyales	-0.246***	-0.2778***	-0.2805***	-0.1778**	-0.0876	0.1538*	-0.1126.	0.1305*	0.3014***	-0.2833***	-0.1834**	-0.2401***
Cyanobacteria_Oxyphotobacteria_Limnotrichales	0.0299	0.0586	0.0664	-0.0195	0.069	0.0195	-0.0716	-0.0353	-0.043	0.0352	0.0117	0.0195
Cyanobacteria_Oxyphotobacteria_NA	-0.0196	-0.0103	-0.0421	0.0095	-0.0364	0.0345	0.05	0.0639	0.0417	-0.0487	-0.0046	-0.0255
Cyanobacteria_Oxyphotobacteria_Nostocales	-0.0794	-0.0767	-0.1417*	0.0326	-0.0608	0.0797	-0.0789	0.1129.	0.1818**	-0.0995	-0.194**	-0.2453***
Cyanobacteria_Oxyphotobacteria_Oxyphotobacteria Incertae Sedis	-0.2963***	-0.3746***	-0.2882***	-0.2208***	-0.2033**	0.0574	-0.1162.	0.2381***	0.3158***	-0.2457***	-0.3767***	-0.3915***
Cyanobacteria_Oxyphotobacteria_Phormidesmiales	0.0184	-0.0128	-0.0266	0.0237	-9e-04	0.04	-0.0291	0.0767	0.031	-0.029	-0.0698	-0.0698
Cyanobacteria_Oxyphotobacteria_Pseudanabaenales	-0.1428*	-0.0648	-0.1012	-0.0657	-0.0898	-0.0605	-0.0118	-0.0523	0.1098.	-0.0784	-0.1202.	-0.1331*
Cyanobacteria_Oxyphotobacteria_SepB-3	-0.0951	-0.0977	-0.0885	-0.0977	-0.069	0.0482	-0.0169	0.0092	0.0977	-0.1003	-0.0742	-0.0899
Cyanobacteria_Oxyphotobacteria_Synechococcales	-0.099	-0.1297*	0.0027	-0.1405*	-0.0394	0.1074.	-0.2262***	0.1076.	0.1207.	-0.1805**	-0.1281*	-0.1341*
Cyanobacteria_Oxyphotobacteria_Thermosynechococcales	-0.1023	-0.1184.	-0.0957	-0.0913	-0.1293*	-0.0059	0.021	0.0695	0.0947	-0.061	-0.0858	-0.0955
Cyanobacteria_Sericytochromatia_Cyanobacteria/Melainabacteria group bacterium S15B-MN24 CBMW_12	-0.1425*	-0.0636	-0.1448*	-0.1169.	-0.1609*	-0.0723	0.0994	-0.0354	0.0863	-0.0121	-0.0502	-0.0639
Cyanobacteria_Sericytochromatia_Hyaloperonospora arabidopsidis	-0.0247	-0.0195	0.0586	-0.0898	-0.0273	-0.0404	-0.0534	-0.0916	-0.0586	0.0898	0.0195	0.0274
Cyanobacteria_Sericytochromatia_metagenome	0.0144	0.0084	-0.0645	0.084	0.0063	0.0945	0.0134	0.0788	0.0599	-0.0276	-0.0823	-0.1186.
Cyanobacteria_Sericytochromatia_NA	-0.0619	-0.0717	-0.0321	-0.0915	-0.0826	0	0.116.	0.0147	-0.0096	0.0898	-0.0154	-0.0586
Cyanobacteria_Sericytochromatia_uncultured Bacillales bacterium	0.0866	-0.0084	3e-04	0.0986	-0.035	0.0077	0.0214	0.0174	0.0456	-0.0489	0.0502	0.0483
Cyanobacteria_Sericytochromatia_uncultured bacterium	-0.3315***	-0.2224***	-0.2834***	-0.2708***	-0.3454***	-0.2197***	0.1889**	-0.1354*	0.1529*	0.0745	-0.1191.	-0.1504*
Cyanobacteria_Sericytochromatia_uncultured cyanobacterium	0.0488	0.0949	0.0481	-0.023	0.0203	-0.0396	0.015	-0.1009	-0.1274*	0.1743**	0.0214	0.0341
Cyanobacteria_Sericytochromatia_uncultured Halanaerobiaceae bacterium	-0.1291*	-0.0929	-0.1004	-0.1125.	-0.1095.	-0.0853	-0.0084	0.0483	0.1306*	-0.1412*	-0.0673	-0.0387
Cyanobacteria_Sericytochromatia_uncultured prokaryote	0.0768	0.043	0.043	0.1055.	0.0169	0.0872	0.056	0.0641	-0.0273	-0.0247	0.0299	0.0117
Cyanobacteria_Sericytochromatia_uncultured soil bacterium	-0.1242*	-0.0682	-0.157*	-0.0485	-0.0325	0.0278	0.0196	0.0277	0.0991	0.0025	-0.1704**	-0.2124***
Cyanobacteria_Sericytochromatia_unidentified	-0.1213.	-0.176**	-0.2531***	-0.1038	-0.1845**	-0.0019	0.0678	0.1445*	0.1656**	-0.0751	-0.1539*	-0.2017**
Dadabacteria_Dadabacteriia_Dadabacteriales	0.2567***	0.1462*	0.2716***	-0.0575	0.2097***	0.1366*	-0.0641	0.0444	-0.2987***	0.3126***	0.0651	0.0378
Deinococcus-Thermus_Deinococci_Deinococcales	0.0795	-0.0283	0.0167	0.059	-0.0109	-6e-04	0.0482	0.0114	-0.0247	0.0441	0.047	0.0269
Deinococcus-Thermus_Deinococci_Thermales	0.0258	-0.0126	-0.0035	0.0256	0.0216	0.0132	-0.0433	0.0244	0.0358	-0.0463	-0.0031	0.0104
Dependentiae_Babeliae_Babeliales	0.0406	0.1405*	-0.0288	0.0491	0.0605	0.019	0.1012	-0.025	-0.1472*	0.3423***	-0.0973	-0.1521*
Elusimicrobia_Elusimicrobia_FCPU453	-0.0974	-0.0091	-0.1928**	0.0066	-0.2264***	-0.2009**	0.2651***	-0.0874	0.05	0.07	0.0097	-0.0474
Elusimicrobia_Elusimicrobia_Lineage IV	-0.6115***	-0.3891***	-0.586***	-0.2606***	-0.5211***	-0.4601***	0.1866**	-9e-04	0.4274***	-0.1501*	-0.408***	-0.3803***
Elusimicrobia_Elusimicrobia_MD2894-B20	0.0757	0.1076.	0.1373*	0.029	0.1126.	0.1034	-0.1696**	-0.0457	-0.024	-0.0636	0.04	0.0075
Elusimicrobia_Elusimicrobia_MVP-88	-0.0692	-0.0529	-0.1123.	-0.097	-0.0115	0.1229.	-0.0098	0.003	0.072	0.0083	-0.0522	-0.1261*
Elusimicrobia_Elusimicrobia_NA	0.1171.	0.0792	0.0382	0.0878	0.0642	-0.0298	-0.0078	-0.0032	-0.0607	0.0506	0.0565	0.0851
Elusimicrobia_Endomicrobia_Endomicrobiales	0.1432*	0.3004***	0.1826**	0.1736**	0.1284*	0.082	0.0317	-0.1589*	-0.1769**	0.1163.	0.201**	0.115.
Elusimicrobia_Lineage IIa_actinobacterium YJF1-30	0.0322	0.0376	0.0388	-0.033	0.0458	-0.0014	0.0168	-0.0153	-0.0391	0.06	0.0382	0.0393
Elusimicrobia_Lineage IIa_bacterium LWH54	-0.0456	-0.0794	-0.0404	-0.0013	-0.0326	-0.0247	-0.0247	0.0641	0.0534	-0.0482	-0.0898	-0.0534
Elusimicrobia_Lineage IIa_metagenome	0.0709	0.0546	-0.0197	0.0698	0.03	0.0109	0.0152	0.0963	-0.0288	0.1107.	-0.052	-0.0461
Elusimicrobia_Lineage IIa_NA	-0.218***	-0.1025	-0.1224.	-0.1547*	-0.1365*	-0.1305*	-0.0169	-0.1405*	0.0595	0.0079	-0.0991	-0.1068.
Elusimicrobia_Lineage IIa_uncultured actinobacterium	0.1022	0.0446	0.0827	0.117.	0.0749	0.0919	-0.1033	0.0113	-0.0385	5e-04	-0.0057	-0.0401
Elusimicrobia_Lineage IIa_uncultured bacterium	-0.0808	-0.0852	-0.0815	-0.113.	-0.0137	-0.0777	0.0031	0.0118	0.0589	0.0025	-0.0232	0.0186
Elusimicrobia_Lineage IIa_uncultured Elusimicrobia bacterium	-0.1119.	-0.0285	-0.1286*	-0.0816	-0.1547*	-0.1132.	0.1281*	-0.0391	0.0307	0.0831	-0.0335	-0.0688
Elusimicrobia_Lineage IIa_uncultured soil bacterium	-0.068	0.0634	-0.1763**	-0.018	-0.1888**	-0.1068.	0.2782***	0.026	0.0195	0.1314*	-0.0168	-0.0384
Elusimicrobia_Lineage IIb_metagenome	-0.0041	-0.0624	-0.0838	0.0078	0.0103	0.1036	-0.0196	0.0946	0.051	-0.0211	-0.0754	-0.1317*
Elusimicrobia_Lineage IIb_NA	0.0404	0.1108.	0.0551	0.1169.	0.0705	-0.0338	0.0368	-0.0919	-0.0787	0.0796	0.0286	0.0093
Elusimicrobia_Lineage IIb_uncultured bacterium	0.0147	0.0614	0.1398*	-0.1281*	0.1011	0.0625	-0.1011	-0.0875	-0.1206.	0.0546	0.0695	0.0678
Elusimicrobia_Lineage IIb_uncultured organism	0.1211.	0.0232	0.034	0.1067.	0.0687	0.065	-0.0205	0.081	-0.0637	0.0936	-0.028	-0.0117
Elusimicrobia_Lineage IIb_uncultured soil bacterium	-0.1338*	0.0015	-0.0794	-0.1402*	-0.1774**	-0.1354*	0.0977	-0.1238*	-0.0418	0.1683**	-0.0305	-0.0414
Elusimicrobia_Lineage IIb_uncultured Termite group 1 bacterium	0.0424	0.083	0.0941	-0.0277	0.0978	0.0277	-0.1015	-0.0501	-0.0609	0.0498	0.0166	0.0277
Elusimicrobia_Lineage IIc_Elusimicrobia bacterium RIFCSPHIGHO2_02_FULL_39_36	0.0467	0.0872	0.0908	0.0779	0.0817	-0.0336	-0.1006	-0.0783	-0.0502	0.0212	0.0084	-0.0037
Elusimicrobia_Lineage IIc_Elusimicrobia bacterium RIFOXYA2_FULL_39_19	-0.0223	0.0522	0.0045	0.0131	-0.0551	-0.0904	0.0803	-0.1271*	-0.0376	0.0659	0.0682	0.066
Elusimicrobia_Lineage IIc_NA	0.1071.	0.0455	0.1092.	0.0769	0.1079.	0.032	-0.0564	0.004	-0.0791	0.0616	-0.016	-0.036
Elusimicrobia_Lineage IIc_uncultured bacterium	-0.0893	9e-04	-0.0317	-0.0555	-0.0714	-0.1256*	0.0187	-0.162**	-0.011	0.0565	0.0348	0.0155
Elusimicrobia_Lineage IIc_uncultured prokaryote	0.1244*	0.1	0.0362	0.0798	0.0724	0.0955	0.063	0.0313	-0.1003	0.0933	0.0569	0.0028
Elusimicrobia_NA_NA	-0.0495	0.0162	-0.0387	-0.0154	-0.0219	-0.0123	0.0138	-0.047	0.0144	-0.002	0.0281	0.0073
Elusimicrobia_Rs-M47_uncultured bacterium	-0.0117	0.0508	0.0352	0.0169	-0.0378	-0.0013	0.0482	-0.0079	0.0143	-0.0404	0.0742	0.0951
Elusimicrobia_Rs-M47_uncultured delta proteobacterium	-0.0326	-0.056	-0.043	-0.0508	-0.0586	-0.0273	0.0143	-0.0589	0.0508	-0.0456	0.0352	0.0716
Elusimicrobia_Rs-M47_uncultured organism	-0.0117	0.0508	0.0352	0.0169	-0.0378	-0.0013	0.0482	-0.0079	0.0143	-0.0404	0.0742	0.0951
Elusimicrobia_uncultured bacterium_uncultured bacterium	0.0299	0.0586	0.0664	-0.0195	0.069	0.0195	-0.0716	-0.0353	-0.043	0.0352	0.0117	0.0195
Entotheonellaeota_Entotheonellia_Entotheonellales	-0.0868	-0.1062.	-0.0313	-0.1128.	-0.0672	6e-04	-0.0462	0.003	0.0351	-0.0228	-0.0833	-0.0743
Epsilonbacteraeota_Campylobacteria_Campylobacterales	0.1582*	0.1738**	0.2097***	0.2383***	0.331***	0.1881**	-0.3568***	-0.0392	-0.1061.	0.0932	-0.0623	-0.0647
FBP_metagenome_metagenome	-0.0074	-0.0203	0.0198	-0.0455	-0.0154	0.013	-0.0286	-0.0153	0.0025	-0.0145	0.0257	-0.0015
FBP_NA_NA	-0.1344*	-0.0625	-0.0992	-0.0369	-0.1441*	-0.1006	0.0741	-0.0333	0.0733	-0.0102	-0.0562	-0.0633
FBP_uncultured actinobacterium_uncultured actinobacterium	0.1055.	0.0742	-0.0039	0.0977	0.056	0.1055.	0.0247	0.1034	-0.0508	0.1055.	-0.0534	-0.0821
FBP_uncultured bacterium_uncultured bacterium	0.0768	0.043	0.043	0.1055.	0.0169	0.0872	0.056	0.0641	-0.0273	-0.0247	0.0299	0.0117
FBP_uncultured soil bacterium_uncultured soil bacterium	-0.063	-0.0065	0.0706	-0.1853**	-0.0948	-0.1098.	-0.0579	-0.1864**	-0.0172	0.0504	0.118.	0.1178.
FCPU426_metagenome_metagenome	-0.11.	-0.0875	0.0117	0.0167	0.0173	-0.0521	-0.1966**	-0.1552*	0.0305	0.0215	-0.1708**	-0.1785**
FCPU426_NA_NA	-0.0022	0.0355	-0.016	-0.0113	0.0245	0.0724	0.0037	-0.0205	-0.033	0.0413	-0.0209	-0.0771
FCPU426_uncultured bacterium_uncultured bacterium	-0.016	0.1197.	0.0798	0.0095	0.0364	-0.1073.	0.0035	-0.241***	-0.1417*	0.195**	0.0457	-0.0329
FCPU426_uncultured microorganism_uncultured microorganism	0.1526*	0.1382*	0.1567*	0.1383*	0.1767**	0.0327	-0.0924	-0.0411	-0.1045.	0.0534	0.0723	0.084
FCPU426_uncultured Syntrophaceae bacterium_uncultured Syntrophaceae bacterium	0.0423	0.0247	0.0712	-0.0155	-0.0013	0.0441	-0.0872	0.005	0.0085	-0.0623	0.0427	0.0335
Fibrobacteres_Chitinivibrionia_uncultured	0.1763**	0.2975***	0.1096.	0.1003	0.1395*	-0.0026	0.0394	0.0388	-0.2125***	0.2634***	0.0403	0.037
Fibrobacteres_Fibrobacteria_Fibrobacterales	-0.0193	-0.1171.	0.0067	0.0657	0.052	0.1315*	-0.1687**	-0.0147	0.0871	-0.0306	-0.1186.	-0.1644**
Firestonebacteria_Candidatus Firestonebacteria bacterium RIFOXYD2_FULL_39_29_Candidatus Firestonebacteria bacterium RIFOXYD2_FULL_39_29	0.0395	0.0635	0.014	0.0408	0.0033	-0.0614	0.0191	-0.0345	-0.0296	0.0511	0.038	0.0515
Firestonebacteria_NA_NA	0.0221	0.0013	0.0195	0.0247	-0.0534	-0.0482	-0.0326	-0.0589	0.0612	-0.0664	0.0898	0.0795
Firestonebacteria_uncultured bacterium_uncultured bacterium	0.0125	0.0957	0.1335*	-0.0952	0.0576	-0.0298	-0.1143.	-0.2411***	-0.0644	0.0271	0.1356*	0.0857
Firmicutes_Bacilli_Bacillales	-0.1711**	-0.2487***	-0.414***	0.2396***	-0.4745***	-0.1693**	0.3413***	0.3014***	0.3356***	-0.1497*	-0.3176***	-0.3678***
Firmicutes_Bacilli_Lactobacillales	0.061	-0.0535	0.0135	0.065	0.0506	0.257***	-0.0826	0.2297***	0.0199	-0.0578	-0.1125.	-0.161*
Firmicutes_Bacilli_NA	-0.0089	-0.1067.	0.0259	-0.0204	-0.0432	0.1125.	-0.0492	0.138*	0.0061	-0.0216	-0.1467*	-0.1698**
Firmicutes_BRH-c20a_NA	0.0221	0.0013	0.0195	0.0247	-0.0534	-0.0482	-0.0326	-0.0589	0.0612	-0.0664	0.0898	0.0795
Firmicutes_BRH-c20a_uncultured bacterium	0.0013	-0.0226	-0.0106	-0.03	0.0253	0.0389	-0.081	0.0352	0.0226	-0.0189	-0.0721	-0.0612
Firmicutes_Clostridia_Clostridiales	-0.1864**	-0.1889**	-0.2478***	0.1602*	-0.3441***	-0.1275*	0.1096.	0.0251	0.3648***	-0.3514***	-0.1095.	-0.1573*
Firmicutes_Clostridia_D8A-2	0.0722	0.1051.	0.1088.	0.1051.	0.12.	-0.0036	-0.0888	-0.0358	-0.1088.	0.1088.	0.0237	0.0331
Firmicutes_Clostridia_DTU014	0.0516	0.0422	0.0264	0.1154.	-0.0182	-0.0396	0.1002	0.0126	0.0012	-0.0183	0.091	0.0959
Firmicutes_Clostridia_MBA03	0.1292*	0.0831	0.0275	0.1439*	0.0518	0.1366*	0.0571	0.1188.	-0.0554	0.0576	-0.0168	-0.0501
Firmicutes_Clostridia_NA	0.0232	0.0453	-0.0017	0.0546	-0.0316	0.0495	-0.0029	0.0404	0.0243	-0.0573	-0.0171	-0.0637
Firmicutes_Clostridia_Thermoanaerobacterales	0.0046	0.0619	-0.0243	0.0707	-0.0349	-0.0579	0.1	0.0379	-0.001	0.0654	-0.0225	-0.0242
Firmicutes_Erysipelotrichia_Erysipelotrichales	0.0361	0.0199	0.0278	0.0617	0.0369	-0.0307	-0.0652	0.0263	-0.0404	0.0693	-0.0866	-0.0769
Firmicutes_Limnochordia_Limnochordales	-0.0036	-0.0392	-0.1014	0.2176***	-0.0983	-0.0275	0.1618*	0.111.	0.0742	-0.048	-0.0528	-0.0859
Firmicutes_NA_NA	0.1779**	0.1206.	0.0807	0.0236	0.105.	0.0678	0.1271*	-0.0171	-0.2156***	0.3289***	0.0873	0.0483
Firmicutes_Negativicutes_Selenomonadales	-0.1808**	-0.132*	-0.2168***	0.0887	-0.3778***	-0.3664***	0.2334***	-0.094	0.2376***	-0.1221.	0.0156	0.037
Fusobacteria_Fusobacteriia_Fusobacteriales	0.013	0.0296	0.0897	0.0115	-0.0589	0.0366	0.0252	0.0214	-0.0261	-0.0156	0.0604	0.0704
GAL15_uncultured bacterium_uncultured bacterium	0.2626***	0.1264*	0.0343	0.2059**	0.1377*	0.1841**	-0.0324	0.266***	-0.1258*	0.2457***	-0.1442*	-0.1625**
GAL15_uncultured Firmicutes bacterium_uncultured Firmicutes bacterium	0.036	0.0092	0.0219	0.0776	0.0535	0.0091	0.0074	-0.0548	-0.0373	0.0204	0.0133	0.011
Gemmatimonadetes_AKAU4049_uncultured soil bacterium	0.1495*	0.1052.	-0.0055	0.1384*	0.0793	0.1495*	0.0351	0.1466*	-0.072	0.1495*	-0.0757	-0.1163.
Gemmatimonadetes_BD2-11 terrestrial group_metagenome	0.0831	-0.0232	-0.0572	0.1176.	-0.1328*	-0.0245	0.1942**	0.1917**	-0.0442	0.1429*	-0.0573	-0.0848
Gemmatimonadetes_BD2-11 terrestrial group_NA	0.043	0.0104	0.0091	0.0872	0.0013	-0.0326	0.0404	-0.0079	0.0299	-0.0534	0.0977	0.1055.
Gemmatimonadetes_BD2-11 terrestrial group_uncultured soil bacterium	0.0079	-0.0161	-0.0653	5e-04	-0.0089	0.109.	0.0057	0.08	0.0328	0.0043	-0.0904	-0.1218.
Gemmatimonadetes_Gemmatimonadetes_Gemmatimonadales	-0.2594***	-0.2213***	-0.3463***	-0.0452	-0.5122***	-0.4885***	0.5126***	0.0893	0.1224.	0.1239*	-0.0598	-0.0109
Gemmatimonadetes_Longimicrobia_Longimicrobiales	0.0306	0.0453	-0.0632	0.1222.	-0.0559	-0.0119	0.163**	0.0808	-0.0022	0.0631	0.0131	-0.0257
Gemmatimonadetes_S0134 terrestrial group_metagenome	-0.0951	-0.0977	-0.0885	-0.0977	-0.069	0.0482	-0.0169	0.0092	0.0977	-0.1003	-0.0742	-0.0899
Gemmatimonadetes_S0134 terrestrial group_NA	0.1583*	0.0897	0.1591*	-0.0034	0.2099***	0.068	-0.1892**	0.0019	-0.1412*	0.0033	0.041	0.076
Gemmatimonadetes_S0134 terrestrial group_uncultured bacterium	0.0554	0.162*	0.2557***	-0.0725	0.3272***	0.1939**	-0.1919**	-0.256***	-0.2172***	-0.0169	0.1702**	0.1437*
Gemmatimonadetes_S0134 terrestrial group_uncultured compost bacterium	0.15*	0.1833**	0.1986**	0.0107	0.1869**	0.0484	0.001	-0.1087.	-0.2154***	0.1389*	0.0941	0.0671
Gemmatimonadetes_S0134 terrestrial group_uncultured Gemmatimonadales bacterium	-0.0536	0.003	0.0424	0.1045.	0.0147	-0.0196	-0.0839	-0.0937	0.0184	-0.0492	-0.0515	-0.0409
Gemmatimonadetes_S0134 terrestrial group_uncultured Gemmatimonadetes bacterium	0.1598*	0.097	0.1129.	0.2076***	0.1081.	-0.0054	-0.1253*	-0.0342	-0.0329	-0.0166	0.0618	0.124*
Gemmatimonadetes_S0134 terrestrial group_uncultured soil bacterium	0.0634	-0.0664	0.0441	-0.0191	-0.0584	-0.0048	0.0394	0.0529	0.0242	-0.0541	0.106.	0.1234.
GN01_uncultured bacterium_uncultured bacterium	0.0586	-0.0247	0.0143	0.0404	0.0299	-0.0612	0.0169	0.0641	-0.0065	-0.0117	0.0404	0.0873
Halanaerobiaeota_Halanaerobiia_Halanaerobiales	0.0829	0.0703	-0.0062	0.225***	-0.0512	0.0871	0.1746**	0.1203.	-0.0143	-0.0066	-0.0046	-0.0443
Hydrogenedentes_Hydrogenedentia_Hydrogenedentiales	0.2773***	0.2937***	0.3611***	0.1288*	0.31***	0.0693	-0.1611*	-0.1607*	-0.272***	0.1192.	0.2105***	0.1848**
Kiritimatiellaeota_Kiritimatiellae_Kiritimatiellales	0.0221	0.0013	0.0195	0.0247	-0.0534	-0.0482	-0.0326	-0.0589	0.0612	-0.0664	0.0898	0.0795
Kiritimatiellaeota_Kiritimatiellae_WCHB1-41	0.1308*	0.1986**	-0.0298	0.2204***	0.0591	-0.0577	0.0359	-0.1328*	-0.0067	0.088	0.1167.	0.0501
Latescibacteria_Latescibacteria bacterium DG_63_Latescibacteria bacterium DG_63	-0.0125	0.0753	-0.0174	-0.0517	-0.0231	-0.071	0.0046	-0.051	-0.0213	0.0739	-0.0231	-0.0116
Latescibacteria_Latescibacteria_Latescibacterales	0.3317***	0.1612*	0.1555*	0.0801	0.1484*	-0.0351	0.0205	0.0829	-0.1899**	0.2743***	0.1359*	0.1579*
Latescibacteria_metagenome_metagenome	0.0886	-0.0621	0.0509	0.0519	-0.0226	0.1248*	-0.0499	0.2497***	-0.0258	0.0244	-0.162**	-0.1579*
Latescibacteria_NA_NA	0.0365	-0.0577	0.0389	-0.1432*	0.0188	0.0555	0.022	0.1556*	-0.083	0.064	-0.0889	-0.0814
Latescibacteria_uncultured Acidobacterium sp._uncultured Acidobacterium sp.	-0.0751	-0.025	-0.1788**	-0.0725	-0.1765**	-0.114.	0.1043.	0.028	0.1096.	0.0128	-0.0802	-0.0953
Latescibacteria_uncultured bacterium mle1-16_uncultured bacterium mle1-16	0.3726***	0.2274***	0.2548***	0.1915**	0.3626***	0.4609***	-0.138*	0.3406***	-0.2583***	0.1008	-0.0854	-0.1546*
Latescibacteria_uncultured bacterium_uncultured bacterium	0.3885***	0.2921***	0.3626***	0.0929	0.3919***	0.2894***	-0.1768**	-0.0832	-0.328***	0.2143***	0.1657**	0.1124.
Latescibacteria_uncultured Bacteroidetes bacterium_uncultured Bacteroidetes bacterium	0.0664	-0.0299	-0.0326	0.0482	0.0247	0.0794	0.0742	0.0641	-0.0352	0.0456	-0.0143	-0.03
Latescibacteria_uncultured Desulfuromonadales bacterium_uncultured Desulfuromonadales bacterium	-0.0083	-0.0688	-0.0099	-0.0612	-0.0288	-0.0953	0.0521	-2e-04	-0.0221	0.0661	0.0275	0.0667
Latescibacteria_uncultured Fibrobacteres bacterium_uncultured Fibrobacteres bacterium	0.1495*	0.1052.	-0.0055	0.1384*	0.0793	0.1495*	0.0351	0.1466*	-0.072	0.1495*	-0.0757	-0.1163.
Latescibacteria_uncultured Latescibacteria bacterium_uncultured Latescibacteria bacterium	0.1325*	0.1144.	0.1775**	0.0505	0.123.	0.1279*	-0.1134.	-0.0355	-0.1292*	0.0641	0.0689	0.0484
Latescibacteria_uncultured low G+C Gram-positive bacterium_uncultured low G+C Gram-positive bacterium	0.1775**	0.2119***	0.237***	0.0446	0.2655***	0.1083.	-0.2249***	-0.0965	-0.1897**	0.1147.	0.0478	0.0567
Latescibacteria_uncultured Pelobacter sp._uncultured Pelobacter sp.	0.2707***	0.1086.	0.1108.	0.1777**	0.1445*	0.0567	0.0227	0.0419	-0.0749	0.0441	0.1871**	0.2171***
Latescibacteria_uncultured prokaryote_uncultured prokaryote	0.0379	-0.0977	-0.0397	0.0081	-0.0564	-0.0379	0.0141	0.1776**	0.0343	-0.0162	-0.0829	-0.0549
Latescibacteria_uncultured proteobacterium_uncultured proteobacterium	0.163**	0.0851	0.1593*	0.2174***	0.0975	0.1598*	-0.13*	0.0422	-0.0219	-0.0758	0.0384	0.009
Latescibacteria_uncultured soil bacterium PBS-II-5_uncultured soil bacterium PBS-II-5	0.1544*	0.1686**	0.1671**	0.103	0.0921	0.0258	-0.0493	-0.148*	-0.1457*	0.131*	0.1609*	0.1478*
Latescibacteria_uncultured soil bacterium PBS-III-30_uncultured soil bacterium PBS-III-30	0.0565	0.0146	0.0385	0.0889	0.0273	0.0039	-0.0938	-0.0122	0.0205	0.0439	0.021	0.0122
Latescibacteria_uncultured soil bacterium PBS-III-32a_uncultured soil bacterium PBS-III-32a	0.1162.	0.0256	0.0292	0.0738	0.092	0.0611	-0.0161	0.0743	-0.0719	0.0848	-0.0295	-0.0186
Latescibacteria_uncultured soil bacterium PRR-10_uncultured soil bacterium PRR-10	-0.041	-0.0564	-0.1121.	0.0533	-0.0236	0.0236	0.0182	-0.0101	0.0948	-0.0545	-0.0162	-0.0238
Latescibacteria_uncultured soil bacterium PRR-12_uncultured soil bacterium PRR-12	-0.0658	-0.0208	0.0458	0.1649**	0.0385	-0.0661	-0.1629**	-0.1346*	0.0427	-0.0773	-0.1073.	-0.0977
Latescibacteria_uncultured soil bacterium_uncultured soil bacterium	0.1404*	-0.1175.	-0.0743	-0.0385	-0.0212	0.0945	-0.0065	0.2278***	0.0731	0.0094	-0.068	-0.0898
Latescibacteria_unidentified bacterium wb1_H11_unidentified bacterium wb1_H11	0.0872	0.0977	0.1029	-0.0117	0.0924	0.0664	-0.0638	-0.0589	-0.082	-0.0039	0.1055.	0.0664
LCP-89_saltmarsh clone LCP-89_saltmarsh clone LCP-89	0.1752**	0.1872**	0.1524*	0.0822	0.2093***	0.1223.	-0.0822	-0.0354	-0.1616*	0.1132.	0.1043.	0.0837
LCP-89_uncultured bacterium_uncultured bacterium	-0.0309	-0.024	0.0531	0.0282	0.006	-0.0363	-0.0525	-0.0731	0.0067	0.0102	0.0077	0.002
Lentisphaerae_Lentisphaeria_Victivallales	0.1133.	0.0932	0.0952	0.1277*	0.1092.	0.0676	-0.0312	-0.0081	-0.0286	-0.0198	0.0749	0.0808
Lentisphaerae_Oligosphaeria_Oligosphaerales	0.1405*	0.1056.	0.1355*	0.1864**	0.211***	-0.0085	-0.177**	-0.052	-0.0843	0.084	-0.0301	-0.0073
Lentisphaerae_Oligosphaeria_SS1-B-02-17	0.06	0.031	-0.0119	0.0715	0.0859	0.0974	-0.0167	0.0975	-0.0327	0.0785	-0.1114.	-0.1309*
Margulisbacteria_metagenome_metagenome	-0.1034	-0.1209.	-0.0988	-0.0998	-0.0224	0.1032	-0.0754	0.0352	0.1274*	-0.1301*	-0.0831	-0.1016
Margulisbacteria_microbial mat metagenome_microbial mat metagenome	0.0768	0.043	0.043	0.1055.	0.0169	0.0872	0.056	0.0641	-0.0273	-0.0247	0.0299	0.0117
Margulisbacteria_uncultured bacterium_uncultured bacterium	-0.0133	0.0866	0.0217	-0.0445	-0.0171	-0.0151	0.0667	-0.1068.	-0.0754	0.0849	0.0551	0.0275
Margulisbacteria_uncultured delta proteobacterium_uncultured delta proteobacterium	0.0194	0.0488	0.1384*	-0.0608	0.057	-0.0053	-0.1427*	-0.1767**	-0.0948	0.043	0.0696	0.038
Margulisbacteria_uncultured Gram-positive bacterium_uncultured Gram-positive bacterium	-0.02	0.0304	-0.0349	0.0115	-0.0698	-0.0792	0.0921	-0.0703	0.0112	0.0089	0.0667	0.0613
Margulisbacteria_uncultured organism_uncultured organism	0.043	0.0104	0.0091	0.0872	0.0013	-0.0326	0.0404	-0.0079	0.0299	-0.0534	0.0977	0.1055.
Modulibacteria_Moduliflexia_Moduliflexales	0.0722	0.0473	0.0699	0.041	0.0096	0.0137	-0.0792	-0.0226	0.0267	-0.0532	0.0699	0.0944
NA_NA_NA	-0.044	0.1188.	-0.0877	-0.0669	-0.1775**	-0.2383***	0.154*	-0.1724**	-0.0549	0.2428***	0.0461	-0.0415
Nitrospinae_P9X2b3D02_NA	0.0425	0.0622	0.0853	-0.0111	0.0407	0.0801	0.1018	-0.0545	-0.0721	-0.0019	0.0894	0.0594
Nitrospinae_P9X2b3D02_uncultured Nitrospina sp.	-0.2007**	-0.0639	-0.1981**	-0.0999	-0.1816**	-0.1166.	0.099	-0.0467	0.105.	0.0058	-0.0764	-0.098
Nitrospinae_P9X2b3D02_uncultured prokaryote	-0.095	-0.1035	-0.2286***	-0.0173	-0.0262	0.1704**	-0.1097.	0.3239***	0.1899**	-0.0786	-0.3429***	-0.378***
Nitrospinae_P9X2b3D02_uncultured soil bacterium	0.043	0.0104	0.0091	0.0872	0.0013	-0.0326	0.0404	-0.0079	0.0299	-0.0534	0.0977	0.1055.
Nitrospirae_4-29-1_NA	-0.0836	0.1584*	0.0573	-0.3462***	0.0922	0.0527	0.0519	-0.2903***	-0.1795**	0.1334*	0.169**	0.0857
Nitrospirae_4-29-1_uncultured bacterium	0.0218	-0.028	0.1087.	-0.1756**	0.4175***	0.4434***	-0.4802***	0.1764**	-0.0556	-0.0743	-0.321***	-0.3358***
Nitrospirae_4-29-1_uncultured Myxococcales bacterium	0.0355	0.0063	0.0457	-0.0225	-0.0679	-0.0703	0.0444	-0.0986	-0.0306	0.084	0.093	0.0875
Nitrospirae_4-29-1_uncultured Nitrospira sp.	0.0013	0.0386	0.0538	0.0809	0.0361	-0.0354	-0.0769	-0.0339	0.0109	-0.0229	-0.0299	-0.0034
Nitrospirae_4-29-1_uncultured Nitrospirae bacterium	0.0364	0.0811	0.0919	-0.054	0.3843***	0.5446***	-0.3023***	0.1165.	-0.0672	-0.1528*	-0.1361*	-0.2351***
Nitrospirae_4-29-1_uncultured prokaryote	0.0141	0.2093***	0.0895	-0.111.	0.036	0.0022	0.0609	-0.1721**	-0.1858**	0.1971**	0.0788	0.061
Nitrospirae_4-29-1_uncultured proteobacterium	0.1547*	0.1754**	0.2325***	-0.0372	0.3572***	0.3296***	-0.3374***	-0.0567	-0.1389*	-0.0352	0.003	-0.0354
Nitrospirae_661256_uncultured bacterium	-0.0247	-0.0195	0.0586	-0.0898	-0.0273	-0.0404	-0.0534	-0.0916	-0.0586	0.0898	0.0195	0.0274
Nitrospirae_Nitrospira_Nitrospirales	-0.3177***	-0.4621***	-0.6244***	-0.112.	-0.3921***	-0.1108.	0.2741***	0.6124***	0.3443***	-0.0418	-0.6414***	-0.6056***
Nitrospirae_Thermodesulfovibrionia_NA	0.2161***	0.2249***	0.2257***	0.021	0.257***	0.1152.	-0.1649**	-0.0402	-0.2037**	0.1447*	0.0916	0.0733
Nitrospirae_Thermodesulfovibrionia_Thermodesulfovibrionales	-0.3741***	-0.4041***	-0.7017***	-0.2157***	-0.4655***	-0.0554	0.3416***	0.5138***	0.3635***	-0.0393	-0.5944***	-0.6433***
Nitrospirae_Thermodesulfovibrionia_uncultured	0.2732***	0.3745***	0.2516***	-0.112.	0.5157***	0.2978***	-0.2933***	-0.0924	-0.2873***	0.1124.	0.1546*	0.1369*
Nitrospirae_Thermodesulfovibrionia_uncultured bacterium	-0.0647	0.04	-0.1153.	0.008	-0.1526*	-0.1864**	0.1601*	-0.0308	0.0104	0.0936	-0.0098	-0.0257
Omnitrophicaeota_Candidatus Omnitrophica bacterium CG1_02_44_16_Candidatus Omnitrophica bacterium CG1_02_44_16	-0.0637	-0.0302	0.0114	-0.0226	0.0748	0.0552	-0.1538*	-0.0614	0.0472	-0.0685	-0.0423	-0.0596
Omnitrophicaeota_Candidatus Omnitrophus magneticus_Candidatus Omnitrophus magneticus	-0.0502	0.0258	-0.0438	-0.061	-0.0776	-0.1212.	0.0569	-0.1171.	-0.01	0.0742	0.0035	0.0069
Omnitrophicaeota_NA_NA	0.1045.	0.0353	0.0477	-0.0171	0.1352*	0.0252	-0.1401*	-0.0411	-0.0531	0.0923	-0.0452	-0.0248
Omnitrophicaeota_Omnitrophia_Omnitrophales	0.0222	0.131*	0.0544	-0.0046	0.0637	-0.0772	-0.0906	-0.2133***	-0.0485	0.0664	0.0469	0.0035
Omnitrophicaeota_Omnitrophica WOR_2 bacterium RIFCSPLOWO2_12_FULL_51_24_Omnitrophica WOR_2 bacterium RIFCSPLOWO2_12_FULL_51_24	0.0426	0.0251	0.0323	-0.0123	0.0817	0.034	-0.0566	0.0344	-0.0161	0.0083	0.0243	0.0347
Omnitrophicaeota_Omnitrophica WOR_2 bacterium RIFOXYA2_FULL_38_17_Omnitrophica WOR_2 bacterium RIFOXYA2_FULL_38_17	0.1337*	0.1126.	0.0782	0.0957	0.0537	0.0851	0.0207	0.0253	-0.0588	0.0216	0.0598	0.0231
Omnitrophicaeota_uncultured bacterium_uncultured bacterium	-0.1193.	0.1083.	-0.1778**	0.0096	-0.1332*	-0.3511***	0.2231***	-0.2223***	0.0127	0.1588*	0.0512	0.0085
Omnitrophicaeota_uncultured Banisveld landfill bacterium BVC56_uncultured Banisveld landfill bacterium BVC56	-0.312***	-0.1485*	-0.2311***	-0.3708***	-0.158*	-0.0651	-0.0362	-0.0033	0.1434*	-0.0599	-0.1787**	-0.2077***
Omnitrophicaeota_uncultured beta proteobacterium_uncultured beta proteobacterium	-0.0569	-0.0384	-0.0985	0.0295	-0.0847	-0.0719	0.082	0.0692	0.0555	-0.0078	-0.0518	-0.0457
Omnitrophicaeota_uncultured Firmicutes bacterium_uncultured Firmicutes bacterium	-0.136*	-0.1371*	-0.1471*	-0.1055.	-0.1591*	-0.0014	0.0089	-0.0039	0.178**	-0.1627**	-0.0587	-0.0904
Omnitrophicaeota_uncultured organism_uncultured organism	0.0939	-2e-04	-0.0552	0.1337*	0.0309	0.0243	0.0562	0.084	-4e-04	0.0447	-0.0571	-0.0732
Omnitrophicaeota_uncultured planctomycete_uncultured planctomycete	0.0518	0.0272	0.0339	-0.0215	0.049	0.0168	-0.0056	-0.0174	-0.0293	0.0433	0.0388	0.0229
Omnitrophicaeota_uncultured prokaryote_uncultured prokaryote	-1e-04	-0.0201	-0.0436	-0.0381	-0.0132	0.0093	0.0288	0.0208	0.008	-0.0362	0.0204	-9e-04
Omnitrophicaeota_uncultured soil bacterium PBS-87_uncultured soil bacterium PBS-87	0.0534	0.0898	0.0898	0.0091	0.0768	0.0586	0.0039	-0.0589	-0.0924	0.0534	0.082	0.0586
Omnitrophicaeota_uncultured Verrucomicrobia bacterium_uncultured Verrucomicrobia bacterium	0.0914	0.1311*	0.1272*	-5e-04	0.148*	0.0588	-0.0185	-0.0871	-0.1418*	0.1148.	0.0635	0.0742
Patescibacteria_ABY1_Candidatus Buchananbacteria	0.0568	0.0494	0.0891	0.0419	-0.0047	-0.052	-0.0435	-0.0567	-0.01	0.0033	0.1135.	0.1396*
Patescibacteria_ABY1_Candidatus Falkowbacteria	-0.0499	0.0043	0.0494	-0.0043	0.0678	0.0402	-0.1479*	-0.1314*	0.0195	-0.071	-0.0033	-0.0558
Patescibacteria_ABY1_Candidatus Kerfeldbacteria	-0.0971	-0.0667	-0.0768	-0.057	-0.0492	0.0549	-0.0224	-0.0373	0.0987	-0.1046.	-0.0636	-0.1122.
Patescibacteria_ABY1_Candidatus Komeilibacteria	0.0286	0.0438	-0.0224	0.092	-0.0698	-0.025	0.0675	0.0508	0.0349	0.0096	0.0366	0.0389
Patescibacteria_ABY1_Candidatus Kuenenbacteria	0.0231	-0.039	0.0686	-0.0514	-0.0237	0.0333	-0.0807	-0.0609	-0.017	0.019	0.0646	0.0419
Patescibacteria_ABY1_Candidatus Magasanikbacteria	-0.0433	0.1393*	-0.1416*	-0.1038	-0.0832	-0.1122.	0.2282***	0.0263	-0.0982	0.2984***	-0.0494	-0.0777
Patescibacteria_ABY1_Candidatus Uhrbacteria	0.0861	0.0336	-0.0554	0.1242*	-0.0029	-0.0304	0.0947	0.0854	-0.0018	0.0592	0.0101	-4e-04
Patescibacteria_ABY1_NA	-0.1728**	-0.1417*	-0.1238*	-0.2079***	-0.0844	-0.0312	-0.0616	-0.0451	0.1051.	-0.0537	-0.0751	-0.088
Patescibacteria_Berkelbacteria_Berkelbacteria bacterium GW2011_GWA2_38_9	0.0768	0.043	0.043	0.1055.	0.0169	0.0872	0.056	0.0641	-0.0273	-0.0247	0.0299	0.0117
Patescibacteria_Berkelbacteria_Berkelbacteria bacterium GW2011_GWE1_39_12	0.0889	0.0602	0.0279	0.0477	0.0495	0.1547*	-3e-04	0.0589	-0.0326	-0.011	0.0048	-0.0464
Patescibacteria_Berkelbacteria_candidate division WS2 bacterium ADurb.Bin280	-0.0846	-0.0508	-0.0169	0.0664	-0.0065	-0.0664	-0.082	-0.0916	0.0716	-0.0742	-0.0977	-0.1042.
Patescibacteria_Berkelbacteria_Candidatus Berkelbacteria bacterium CG1_02_42_45	0.1055.	0.0742	-0.0039	0.0977	0.056	0.1055.	0.0247	0.1034	-0.0508	0.1055.	-0.0534	-0.0821
Patescibacteria_Berkelbacteria_Candidatus Berkelbacteria bacterium CG2_30_43_20	-0.0117	0.0508	0.0352	0.0169	-0.0378	-0.0013	0.0482	-0.0079	0.0143	-0.0404	0.0742	0.0951
Patescibacteria_Berkelbacteria_Candidatus Berkelbacteria bacterium RIFOXYA2_FULL_43_10	-0.0033	0.0163	-0.0128	-0.0534	-0.0149	-0.0041	-0.0033	-0.0221	-0.0336	0.0658	-0.0095	-0.017
Patescibacteria_Berkelbacteria_metagenome	-0.0185	-0.0612	0.0249	0.0081	-0.0238	-0.0453	-0.0426	-0.0337	0.0794	-0.11.	0.0687	0.0924
Patescibacteria_Berkelbacteria_NA	0.0577	0.0017	-0.0105	0.1124.	-0.049	-0.0084	0.0645	0.0111	0.0692	-0.0891	0.1326*	0.1308*
Patescibacteria_Berkelbacteria_uncultured bacterium	0.1118.	0.2154***	0.1217.	-0.0065	0.0643	0.071	0.0325	-0.1475*	-0.1595*	0.0677	0.1784**	0.1261*
Patescibacteria_Berkelbacteria_uncultured epsilon proteobacterium 1025	-0.0244	-0.0049	0.0168	0.018	0.0145	-0.0358	-0.0281	-0.0554	-0.0189	0.025	-0.015	-0.0137
Patescibacteria_Berkelbacteria_uncultured Epsilonproteobacteria bacterium	-0.0716	0.0326	-0.0586	-0.0716	-0.1003	-0.0794	0.0898	-0.0916	-0.0143	0.0664	-0.0039	-0.0195
Patescibacteria_Berkelbacteria_uncultured Microgenomates group bacterium	-0.0508	-0.0729	-0.0508	-0.043	0.0378	0.0977	-0.0898	0.0406	0.082	-0.0833	-0.043	-0.0534
Patescibacteria_Berkelbacteria_uncultured organism	-0.0117	0.0508	0.0352	0.0169	-0.0378	-0.0013	0.0482	-0.0079	0.0143	-0.0404	0.0742	0.0951
Patescibacteria_Berkelbacteria_uncultured soil bacterium	-0.1084.	-0.0518	-0.0144	-0.1754**	-0.1125.	-0.0569	-0.017	-0.1343*	-0.0179	0.0744	-0.0191	-0.0269
Patescibacteria_CPR2_NA	0.0559	0.0751	-0.0114	0.066	-0.0226	0.0403	0.0849	0.0373	-0.0553	0.0635	-0.0167	-0.0318
Patescibacteria_CPR2_uncultured bacterium	0.1938**	0.0952	0.192**	0.0905	0.1586*	0.2805***	-0.1105.	0.2325***	-0.1518*	0.0286	-0.1174.	-0.1324*
Patescibacteria_CPR2_uncultured Clostridium sp.	-0.0507	0.0159	-0.0837	0.1014	-0.1237*	-0.1577*	0.1059.	-0.0507	0.084	-0.0391	0.063	0.0757
Patescibacteria_CPR2_uncultured Firmicutes bacterium	-0.0661	0.0236	-0.0505	0.0397	-0.0232	-0.056	0.0286	-0.0472	0.0303	0.0351	-0.0468	-0.0675
Patescibacteria_CPR2_uncultured microorganism	0.1685**	0.0645	0.0633	0.2123***	0.0416	0.1932**	0.1343*	0.1446*	-0.0651	-0.0246	0.0479	0.0079
Patescibacteria_CPR2_uncultured Spirochaetes bacterium	-0.0508	-0.0729	-0.0508	-0.043	0.0378	0.0977	-0.0898	0.0406	0.082	-0.0833	-0.043	-0.0534
Patescibacteria_Gracilibacteria_Absconditabacteriales (SR1)	-0.0716	0.0326	-0.0586	-0.0716	-0.1003	-0.0794	0.0898	-0.0916	-0.0143	0.0664	-0.0039	-0.0195
Patescibacteria_Gracilibacteria_bacterium enrichment culture clone 24(2013)	0.2681***	0.1864**	0.1992**	0.1621**	0.2833***	0.0538	-0.2411***	0.0524	-0.1255*	0.1189.	0.037	0.0947
Patescibacteria_Gracilibacteria_Candidatus Abawacabacteria	-0.1354*	-0.1494*	-0.2088***	-0.0548	-0.1918**	-0.0533	0.0919	0.0627	0.2114***	-0.1854**	-0.0564	-0.0982
Patescibacteria_Gracilibacteria_Candidatus Peregrinibacteria	0.372***	0.3373***	0.3567***	0.1235.	0.3498***	0.2446***	-0.1	-0.1139.	-0.322***	0.1261*	0.2822***	0.2177***
Patescibacteria_Gracilibacteria_Candidatus Peregrinibacteria bacterium GW2011_GWA2_47_7	-0.017	0.0383	0.0569	0.0206	0.0569	-0.0298	-0.0629	-0.1068.	-0.0198	-0.0335	-0.0318	-0.0475
Patescibacteria_Gracilibacteria_Candidatus Peribacteria	0.1589*	0.109.	0.1318*	0.0637	0.1734**	0.0905	-0.0681	-0.0047	-0.1331*	0.1264*	0.0157	0.0063
Patescibacteria_Gracilibacteria_groundwater metagenome	0.187**	0.0569	-0.1056.	0.1648**	0.0687	0.3431***	0.0898	0.2849***	-0.0361	0.1452*	-0.1925**	-0.2839***
Patescibacteria_Gracilibacteria_JGI 0000069-P22	-0.0508	-0.0729	-0.0508	-0.043	0.0378	0.0977	-0.0898	0.0406	0.082	-0.0833	-0.043	-0.0534
Patescibacteria_Gracilibacteria_marine metagenome	-0.0378	-0.0117	-0.0794	0.0352	-0.0924	-0.1003	0.1029	0.0223	0.0404	0.0065	0.0039	-0.0091
Patescibacteria_Gracilibacteria_NA	0.0732	0.0846	-0.012	0.007	0.0516	0.0184	0.0233	0.0414	-0.0442	0.0862	-0.0091	-0.0202
Patescibacteria_Gracilibacteria_uncultured bacterium	-0.0161	0.0141	-0.038	-0.0749	-0.0259	-0.0983	0.0912	0.045	-0.0155	0.0648	0.0017	-0.0012
Patescibacteria_Gracilibacteria_uncultured marine bacterium	-0.0023	0.0635	0.0422	-0.1102.	0.0488	0.0999	-0.0358	-0.1041.	-0.0445	-0.0177	0.0542	0.0015
Patescibacteria_Gracilibacteria_uncultured sediment bacterium	-0.0098	0.0643	0.0096	-0.0685	0.005	-0.0282	0.0133	-0.0351	-0.0514	0.0408	0.0513	0.0293
Patescibacteria_Gracilibacteria_uncultured soil bacterium	0.2047**	0.0763	0.0639	0.1229.	0.1541*	0.0955	-0.0818	0.184**	-0.0889	0.1044.	-0.0831	-0.0673
Patescibacteria_Kazania_candidate division Kazan bacterium RBG_13_50_9	0.0758	0.0602	0.0591	0.1776**	0.0523	0.0192	-0.0351	0.0415	0.008	-0.0308	-0.0173	-0.0132
Patescibacteria_Kazania_NA	0.0714	0.0019	0.0262	0.1245*	0.0535	-0.0233	-0.0357	0.0649	-7e-04	-0.0082	0.0023	0.0317
Patescibacteria_Kazania_uncultured bacterium	0.0872	0.0977	0.1029	-0.0117	0.0924	0.0664	-0.0638	-0.0589	-0.082	-0.0039	0.1055.	0.0664
Patescibacteria_Microgenomatia_Candidatus Amesbacteria	0.1913**	0.152*	0.1644**	0.0539	0.2181***	0.185**	-0.1431*	-0.0026	-0.1458*	0.0731	0.016	-0.0284
Patescibacteria_Microgenomatia_Candidatus Beckwithbacteria	-0.0508	-0.0729	-0.0508	-0.043	0.0378	0.0977	-0.0898	0.0406	0.082	-0.0833	-0.043	-0.0534
Patescibacteria_Microgenomatia_Candidatus Collierbacteria	-0.0508	-0.0729	-0.0508	-0.043	0.0378	0.0977	-0.0898	0.0406	0.082	-0.0833	-0.043	-0.0534
Patescibacteria_Microgenomatia_Candidatus Curtissbacteria	-0.0991	-0.0025	-0.0392	-0.0831	0.0352	0.0108	-0.0646	-0.0414	0.0299	-0.0285	-0.032	-0.048
Patescibacteria_Microgenomatia_Candidatus Gottesmanbacteria	-0.0013	-0.0612	0.0273	-0.0273	-0.0456	0.0352	-0.0456	0.089	-0.0013	-0.0169	-0.0651	-0.0742
Patescibacteria_Microgenomatia_Candidatus Levybacteria	-0.0169	-0.0729	-0.0378	0.0716	-0.0143	-0.0143	-0.0039	0.0785	0.0352	-0.0352	-0.0651	-0.0534
Patescibacteria_Microgenomatia_Candidatus Roizmanbacteria	0.0903	0.0585	0.0534	0.0662	0.0326	-0.0179	-0.0062	0.0016	-0.0307	-0.0034	0.0918	0.0932
Patescibacteria_Microgenomatia_Candidatus Shapirobacteria	0.0491	0.0879	0.0781	0.0653	0.0237	0.0148	0.0534	-0.0435	-0.0285	-0.0229	0.1471*	0.15*
Patescibacteria_Microgenomatia_Candidatus Woesebacteria	0.1434*	0.1383*	0.1964**	0.0416	0.2223***	0.2069***	-0.0819	0.0434	-0.1598*	0.0668	-0.0417	-0.0798
Patescibacteria_Microgenomatia_Candidatus Woykebacteria	0.0345	0.0946	0.047	-0.0778	0.024	0.0515	0.0115	-0.0827	-0.108.	0.0922	0.0305	-0.014
Patescibacteria_Microgenomatia_metagenome	-0.0293	-0.0955	-0.0378	0.0333	-0.0858	-0.0736	-0.0702	-0.0971	0.1407*	-0.1359*	0.0639	0.0914
Patescibacteria_Microgenomatia_NA	-0.0041	0.0064	0.0262	-0.1036	0.0353	-0.0147	-0.0213	0.0024	-0.0279	-0.0078	0.0277	0.0105
Patescibacteria_Microgenomatia_uncultured soil bacterium	0.0604	0.0025	0.0334	0.0666	-0.008	-0.0076	-0.0228	0.0047	-0.0498	0.0684	0.0081	0.0451
Patescibacteria_NA_NA	-0.068	-0.0362	-5e-04	-0.0319	-0.0242	-0.0153	-0.1327*	-0.1222.	0.0657	-0.1092.	-0.0473	-0.0678
Patescibacteria_Parcubacteria_Candidatus Adlerbacteria	-0.043	-0.0378	-0.0964	0.0794	-0.082	-0.0846	0.1081.	0.0406	0.056	0.0013	-0.0195	-0.0378
Patescibacteria_Parcubacteria_Candidatus Azambacteria	-0.1591*	-0.1406*	-0.1861**	-0.1376*	-0.1314*	-0.0656	0.0124	-0.0243	0.0935	0.0334	-0.1132.	-0.1001
Patescibacteria_Parcubacteria_Candidatus Campbellbacteria	0.0549	0.0151	0.0397	0.004	-0.025	0.1007	8e-04	0.0928	-0.0468	0.0745	-0.0484	-0.0645
Patescibacteria_Parcubacteria_Candidatus Colwellbacteria	-0.0241	-0.0565	-0.0832	-0.0256	0.0143	0.1456*	-0.0481	0.0885	0.0753	-0.0462	-0.0988	-0.1305*
Patescibacteria_Parcubacteria_Candidatus Doudnabacteria	-0.0258	0.0223	0.0664	-0.0514	-0.0462	-0.0294	-0.0034	-0.0703	-0.0312	0.0347	0.0666	0.0869
Patescibacteria_Parcubacteria_Candidatus Giovannonibacteria	0.1544*	0.1883**	0.0778	0.0511	0.1124.	0.115.	0.0475	-0.0015	-0.158*	0.1754**	0.0575	-0.0029
Patescibacteria_Parcubacteria_Candidatus Jorgensenbacteria	0.0207	0.0179	0.0098	0.0058	0.0182	-0.0107	0.0441	-0.0547	-0.0336	0.0317	0.0772	0.0823
Patescibacteria_Parcubacteria_Candidatus Kaiserbacteria	-0.1199.	-0.072	-0.024	0.0941	-0.0092	-0.0941	-0.1162.	-0.1299*	0.1015	-0.1052.	-0.1384*	-0.1477*
Patescibacteria_Parcubacteria_Candidatus Liptonbacteria	0.0439	0.0255	-0.0713	0.1254*	-0.0188	0.0142	0.0943	0.1019	0.004	0.0754	-0.0516	-0.0848
Patescibacteria_Parcubacteria_Candidatus Lloydbacteria	0.0254	0.017	0.0365	-0.0388	0.0921	0.1163.	-0.1089.	-0.0127	5e-04	-0.062	0.0439	0.0089
Patescibacteria_Parcubacteria_Candidatus Moranbacteria	-0.0432	-0.035	-0.0542	-0.1029	-0.041	0.1098.	-0.0064	0.047	0.0084	-0.0215	-0.0672	-0.0973
Patescibacteria_Parcubacteria_Candidatus Nealsonbacteria	0.0977	0.0664	0.0742	0.056	0.1055.	0.0065	-0.0977	0.0406	-0.0664	0.0742	-0.0273	0.0039
Patescibacteria_Parcubacteria_Candidatus Nomurabacteria	-0.0299	-0.0528	0.0319	-0.0189	0.024	0.0064	-0.1078.	-0.0422	0.0203	0.0124	-0.0781	-0.0918
Patescibacteria_Parcubacteria_Candidatus Ryanbacteria	-0.1414*	0.0377	-0.1402*	-0.0989	-0.1808**	-0.1822**	0.1796**	-0.0497	0.025	0.0862	-0.0286	-0.0339
Patescibacteria_Parcubacteria_Candidatus Terrybacteria	-0.0508	-0.0729	-0.0508	-0.043	0.0378	0.0977	-0.0898	0.0406	0.082	-0.0833	-0.043	-0.0534
Patescibacteria_Parcubacteria_Candidatus Vogelbacteria	0.1276*	0.1058.	-0.0032	0.1068.	0.0571	0.0958	0.1016	0.0805	-0.0751	0.1225.	0.0106	-0.0261
Patescibacteria_Parcubacteria_Candidatus Wolfebacteria	0.1057.	0.0685	0.0747	0.1272*	0.1078.	0.0993	-0.0116	-0.0233	-0.0779	0.0355	0.0651	0.0084
Patescibacteria_Parcubacteria_Candidatus Yanofskybacteria	0.1715**	0.0499	0.0715	0.0298	0.1329*	-0.0592	-0.1029	0.0085	-0.0294	0.012	0.0689	0.1221.
Patescibacteria_Parcubacteria_Candidatus Zambryskibacteria	0.0121	-4e-04	-0.0755	0.0427	-0.0515	0.0344	0.0831	0.0134	-0.0118	0.0951	-0.0363	-0.0819
Patescibacteria_Parcubacteria_GWB1-42-6	0.0143	0.0221	0.0508	-0.0586	0.0456	-0.0195	0.0664	-0.0353	-0.0742	0.0977	0.0482	0.0495
Patescibacteria_Parcubacteria_NA	0.1307*	0.1593*	0.0975	0.0809	0.1898**	0.1489*	-0.1329*	-0.0586	-0.1015	0.0953	0.0102	-0.0714
Patescibacteria_Parcubacteria_Paceibacterales	-0.1199.	-0.072	-0.024	0.0941	-0.0092	-0.0941	-0.1162.	-0.1299*	0.1015	-0.1052.	-0.1384*	-0.1477*
Patescibacteria_Parcubacteria_Parcubacteria group bacterium GW2011_GWA1_40_21	0.043	0.0104	0.0091	0.0872	0.0013	-0.0326	0.0404	-0.0079	0.0299	-0.0534	0.0977	0.1055.
Patescibacteria_Parcubacteria_UBA9983	-0.0442	-0.0381	-0.0596	-0.0103	0.0286	0.0043	-0.0408	0.0482	0.0607	-0.0308	-0.0519	-0.0503
Patescibacteria_Parcubacteria_uncultured bacterium	-0.1131.	0.0156	-0.0787	-0.1828**	-0.178**	-0.1097.	0.1345*	-0.1264*	-0.0446	0.1975**	-0.0027	-0.0549
Patescibacteria_Parcubacteria_uncultured deep-sea bacterium	-0.0846	-0.0508	-0.0169	0.0664	-0.0065	-0.0664	-0.082	-0.0916	0.0716	-0.0742	-0.0977	-0.1042.
Patescibacteria_Parcubacteria_uncultured Parcubacteria group bacterium	0.0601	0.0768	0.0462	0.0824	0.0206	0.0786	-0.013	0.0446	-0.0409	0.0348	-0.048	-0.0743
Patescibacteria_Parcubacteria_uncultured soil bacterium	-0.0244	0.0043	-0.1213.	-0.0103	-0.1027	-0.0307	0.148*	-0.0022	6e-04	0.0802	-0.0327	-0.0565
Patescibacteria_Saccharimonadia_Saccharimonadales	-0.4531***	-0.2853***	-0.4258***	-0.205**	-0.5098***	-0.4287***	0.3385***	-0.1814**	0.2334***	0.0595	-0.1388*	-0.115.
Patescibacteria_uncultured_uncultured bacterium	0.0504	0.0529	0.0734	0.0046	0.0674	-0.0188	0.0205	-0.0457	-0.051	0.0467	0.0911	0.1009
Patescibacteria_WWE3_bacterium CG2_30_40_12	-0.0378	-0.0117	-0.0794	0.0352	-0.0924	-0.1003	0.1029	0.0223	0.0404	0.0065	0.0039	-0.0091
Patescibacteria_WWE3_Candidatus Berkelbacteria bacterium RIFCSPHIGHO2_12_FULL_50_11	-0.0758	-0.0765	-0.0111	0.0505	-0.0079	-0.0213	-0.091	0.0242	0.0803	-0.1173.	-0.1278*	-0.1475*
Patescibacteria_WWE3_NA	0.0606	0.0561	0.1118.	-0.0367	0.0565	-0.0126	-0.0062	-0.0978	-0.0932	0.0652	0.1364*	0.1251*
Patescibacteria_WWE3_uncultured bacterium	0.0362	-0.0344	-0.0485	0.1574*	-0.0246	0.0344	0.0321	0.1544*	0.0124	0.0112	-0.1053.	-0.0939
Patescibacteria_WWE3_uncultured candidate division WWE3 bacterium	-0.0898	-0.0925	-0.0638	-0.0638	-0.0117	0.0117	-0.1029	0.0092	0.0872	-0.0833	-0.0482	-0.0534
PAUC34f_NA_NA	-0.1412*	-0.063	-0.0499	-0.0323	-0.0469	-0.067	-0.077	-0.1283*	0.0678	-0.0362	-0.0676	-0.0939
PAUC34f_uncultured Deferribacteres bacterium_uncultured Deferribacteres bacterium	0.0753	0.048	0.0182	0.176**	0.0664	0.0627	-0.066	0.0486	0.0211	-0.0093	-0.0712	-0.0943
Planctomycetes_BD7-11_uncultured bacterium	-0.2153***	-0.0823	-0.0487	-0.175**	-0.1084.	-0.1137.	-0.084	-0.1379*	0.0242	0.0401	-0.1483*	-0.1795**
Planctomycetes_BD7-11_uncultured Planctomycetaceae bacterium	0.034	-0.0528	0.0192	0.0863	-0.0251	0.0629	0.0036	0.1344*	0.0036	-0.0444	-0.0581	-0.0673
Planctomycetes_BD7-11_uncultured planctomycete	0.1055.	0.0742	-0.0039	0.0977	0.056	0.1055.	0.0247	0.1034	-0.0508	0.1055.	-0.0534	-0.0821
Planctomycetes_Brocadiae_Brocadiales	0.1351*	0.0868	0.0068	0.1276*	0.034	0.0943	0.0098	0.0858	-0.0234	0.0838	-0.0098	-0.0491
Planctomycetes_Brocadiae_SM23-32	0.122.	0.0937	0.156*	-0.0063	0.1165.	0.023	-0.1547*	-0.0385	-0.0892	0.047	0.0723	0.092
Planctomycetes_NA_NA	0.262***	0.3139***	0.2989***	0.1348*	0.2639***	0.0358	-0.1279*	-0.1604*	-0.2521***	0.1571*	0.1928**	0.1565*
Planctomycetes_OM190_metagenome	0.0742	-0.0423	-0.0013	0.0767	0.0164	0.1236*	0.0416	0.2387***	0.0369	-0.0825	-0.1231.	-0.1266*
Planctomycetes_OM190_NA	0.0184	-0.0943	-0.1763**	0.0623	-0.0734	0.0408	0.0337	0.334***	0.0786	0.0701	-0.2758***	-0.2958***
Planctomycetes_OM190_planctomycete A-2	0.0792	0.0226	-0.0297	0.0617	0.0521	0.1475*	-4e-04	0.1568*	0.0045	0.0144	-0.1088.	-0.1334*
Planctomycetes_OM190_uncultured bacterium	0.1423*	0.0012	-0.0638	0.0874	-0.02	0.0709	0.1669**	0.2342***	-0.0703	0.144*	-0.0984	-0.122.
Planctomycetes_OM190_uncultured Crater Lake bacterium CL500-15	0.1053.	0.1128.	0.2039**	-0.0197	0.1304*	0.0564	-0.1246*	-0.0351	-0.1597*	0.126*	0.0155	0.016
Planctomycetes_OM190_uncultured Planctomyces sp.	0.0664	-0.0299	-0.0326	0.0482	0.0247	0.0794	0.0742	0.0641	-0.0352	0.0456	-0.0143	-0.03
Planctomycetes_OM190_uncultured soil bacterium	-0.0834	0.0254	-0.103	-0.0581	-0.1872**	-0.1482*	0.1604*	-0.059	0.0215	0.08	-0.003	-0.0377
Planctomycetes_Phycisphaerae_CCM11a	0.1355*	0.0818	-0.018	0.1236*	0.0146	-0.0098	0.0759	0.0944	-0.0133	0.0874	0.0225	0.0374
Planctomycetes_Phycisphaerae_DG-20	0.1166.	0.0849	0.0665	0.0146	0.0775	-0.0232	-0.0269	-0.0441	-0.0672	0.0459	0.0853	0.1118.
Planctomycetes_Phycisphaerae_mle1-8	0.0335	0.1385*	0.0624	-0.1208.	0.0442	-0.1676**	0.0195	-0.1375*	-0.1352*	0.1732**	0.114.	0.1496*
Planctomycetes_Phycisphaerae_MSBL9	0.4975***	0.4188***	0.5614***	0.3525***	0.5192***	0.0833	-0.2366***	-0.2294***	-0.3747***	0.1267*	0.4139***	0.4916***
Planctomycetes_Phycisphaerae_NA	-0.0637	-0.0013	-0.0163	-0.0296	-0.1012	-0.0533	0.0441	-0.0612	0.0129	0.0458	-0.0055	-0.0082
Planctomycetes_Phycisphaerae_Phycisphaerales	0.1608*	0.3153***	0.1472*	-0.0205	0.0426	-0.155*	0.2066***	-0.2024**	-0.3079***	0.3505***	0.1978**	0.1382*
Planctomycetes_Phycisphaerae_Pla1 lineage	-0.0896	-0.0062	-0.14*	0.0252	-0.109.	-0.1957**	0.1181.	-0.0578	0.1147.	-0.0105	0.077	0.1004
Planctomycetes_Phycisphaerae_S-70	0.1531*	0.1814**	0.0441	0.035	0.0216	-0.0752	0.1092.	-0.0777	-0.1765**	0.2594***	0.1016	0.1189.
Planctomycetes_Phycisphaerae_Tepidisphaerales	0.1558*	0.2687***	0.3165***	-0.0357	0.0025	-0.2463***	0.2707***	-0.4442***	-0.3972***	0.3627***	0.4849***	0.4987***
Planctomycetes_Pla3 lineage_metagenome	0.1113.	-0.047	0.0791	0.1001	0.0863	0.0973	-0.056	0.2026**	-0.055	0.0296	-0.1267*	-0.1008
Planctomycetes_Pla3 lineage_NA	0.1684**	0.1235.	0.1488*	0.1227.	0.1737**	0.1868**	-0.1108.	0.0485	-0.082	0.0065	0.055	-0.0066
Planctomycetes_Pla3 lineage_uncultured bacterium	0.0154	-0.0388	0.1235.	0.1241*	0.1062.	0.0711	-0.2318***	-0.0185	0.0132	-0.0812	-0.0676	-0.046
Planctomycetes_Pla3 lineage_uncultured planctomycete	0.0664	-0.0299	-0.0326	0.0482	0.0247	0.0794	0.0742	0.0641	-0.0352	0.0456	-0.0143	-0.03
Planctomycetes_Pla3 lineage_uncultured soil bacterium PBS-II-37	0.1353*	0.083	0.209***	0.0351	0.1772**	0.0504	-0.1583*	-0.0949	-0.1028	-0.0411	0.093	0.0828
Planctomycetes_Pla3 lineage_unidentified bacterium wb1_E15	0.0906	0.0886	0.0997	0.026	0.1237*	0.0184	-0.12.	0.0039	-0.0776	0.0776	-0.0112	0.0166
Planctomycetes_Pla4 lineage_metagenome	-0.0243	-0.1127.	-0.1583*	-0.0523	0.0036	0.0412	-0.004	0.1921**	0.0307	0.118.	-0.1799**	-0.1846**
Planctomycetes_Pla4 lineage_NA	0.1791**	0.1325*	0.1496*	0.04	0.1327*	0.1412*	-0.0308	-0.0689	-0.1896**	0.163**	0.0936	0.0688
Planctomycetes_Pla4 lineage_uncultured bacterium	0.034	0.176**	0.1003	-0.0131	0.1003	0.0048	-0.012	-0.1211.	-0.1399*	0.1676**	0.0209	-0.0118
Planctomycetes_Pla4 lineage_uncultured deep-sea bacterium	-0.0456	-0.0794	-0.0404	-0.0013	-0.0326	-0.0247	-0.0247	0.0641	0.0534	-0.0482	-0.0898	-0.0534
Planctomycetes_Pla4 lineage_uncultured organism	-0.1107.	-0.0127	-0.0536	-0.0041	-0.0759	-0.1034	0.006	-0.1299*	0.0403	-0.0051	-0.0717	-0.0874
Planctomycetes_Pla4 lineage_uncultured Planctomycetaceae bacterium	0.1404*	0.0871	0.1188.	0.0728	0.102	-0.0199	-0.0869	-0.0227	-0.0451	-0.0098	0.1304*	0.1487*
Planctomycetes_Pla4 lineage_uncultured Planctomycetales bacterium	0.1114.	-0.0139	0.0396	0.0699	0.0581	0.1008	-0.0186	0.1439*	-0.0517	0.0789	-0.0451	-0.052
Planctomycetes_Pla4 lineage_uncultured planctomycete	0.0162	0.087	0.0359	0.0472	-0.0092	-0.0662	-0.0107	-0.0133	-0.0891	0.1502*	-0.0651	-0.1031
Planctomycetes_Pla4 lineage_uncultured prokaryote	-0.0977	-0.0728	-0.0698	-0.1142.	-0.1248*	0.0017	0.0165	0.003	0.0475	-0.0291	-0.0827	-0.1062.
Planctomycetes_Planctomycetacia_Gemmatales	-0.2481***	-0.1832**	-0.193**	-0.1801**	-0.3579***	-0.181**	0.2307***	0.0999	0.0434	0.1673**	-0.2783***	-0.3116***
Planctomycetes_Planctomycetacia_Isosphaerales	0.4819***	0.5089***	0.7712***	-0.037	0.5294***	0.171**	-0.2155***	-0.5368***	-0.6301***	0.3328***	0.5996***	0.5593***
Planctomycetes_Planctomycetacia_Pirellulales	0.0231	0.024	-0.1686**	0.0513	-0.1345*	0.0661	0.1646**	0.2834***	0.0347	0.1163.	-0.2087***	-0.2436***
Planctomycetes_Planctomycetacia_Planctomycetales	-0.4402***	-0.3556***	-0.5152***	-0.2283***	-0.427***	-0.1864**	0.2482***	0.1446*	0.2676***	0.0691	-0.4394***	-0.4923***
Planctomycetes_Planctomycetacia_uncultured	-0.0228	-0.1286*	-0.086	-0.0512	-0.129*	0.0611	0.1092.	0.1177.	0.0121	0.0447	-0.0851	-0.125*
Planctomycetes_vadinHA49_bacterium 09.96.18	0.043	0.0104	0.0091	0.0872	0.0013	-0.0326	0.0404	-0.0079	0.0299	-0.0534	0.0977	0.1055.
Planctomycetes_vadinHA49_bacterium UW 659-2-F09	0.1069.	0.0112	-0.0203	0.061	0.0737	0.0837	-0.0166	0.055	-0.0157	0.0649	-0.0547	-0.0695
Planctomycetes_vadinHA49_metagenome	-0.0762	-0.0413	-0.0274	-0.1508*	-0.0507	-0.0667	-0.0141	-0.0734	-0.0045	0.054	-0.0511	-0.0387
Planctomycetes_vadinHA49_NA	-0.1807**	-0.1772**	-0.1104.	-0.1779**	-0.0982	-0.0437	-0.1037	0.0829	0.1044.	-0.044	-0.2372***	-0.244***
Planctomycetes_vadinHA49_uncultured Antarctic bacterium LB3-13	-0.0959	-0.0734	-0.032	-0.0528	-0.0176	-0.0214	-0.0186	-0.0678	0.0552	-0.0447	-0.0716	-0.0837
Planctomycetes_vadinHA49_uncultured bacterium	0.0034	-0.0213	0.015	-0.0011	0.0215	0.0548	0.013	0.0357	-0.0049	-0.0126	-0.0224	-0.0284
Planctomycetes_vadinHA49_uncultured organism	-0.0224	0.0222	-0.0299	-0.0389	-0.004	0.0538	-0.0047	-0.0057	0.0271	-0.0317	-2e-04	-0.0098
Planctomycetes_vadinHA49_uncultured Planctomycetales bacterium	-0.1031	-0.0973	-0.0594	-0.1996**	-0.0372	0.0842	7e-04	-0.0348	0.0634	-0.0817	-0.0384	-0.0761
Planctomycetes_vadinHA49_uncultured soil bacterium	0.0198	0.0166	0.0309	-0.0348	0.0619	0.0428	-0.1083.	0.0085	-0.0075	0.0061	-0.0519	-0.0381
Poribacteria_uncultured Firmicutes bacterium_uncultured Firmicutes bacterium	0.1323*	0.1014	0.1082.	0.0761	0.116.	0.0236	-0.0708	-0.015	-0.0691	0.0104	0.1013	0.1015
Proteobacteria_Alphaproteobacteria_Acetobacterales	-0.2861***	-0.2424***	-0.2045**	-0.0788	-0.2147***	-0.2126***	-0.0482	-0.1147.	0.2309***	-0.0694	-0.1178.	-0.0945
Proteobacteria_Alphaproteobacteria_Azospirillales	0.216***	0.1882**	0.3488***	0.0829	0.1391*	-0.0085	-0.0529	-0.1876**	-0.2865***	0.2503***	0.1581*	0.149*
Proteobacteria_Alphaproteobacteria_Caedibacterales	0.0813	0.0088	0.0653	0.0714	0.0039	-0.0202	-0.0675	0.0308	0.0122	-0.0319	0.049	0.0589
Proteobacteria_Alphaproteobacteria_Caulobacterales	-0.1132.	-0.1219.	-0.0283	0.1918**	-0.2982***	-0.1906**	0.2157***	-0.142*	0.1185.	-0.0924	0.0753	0.0791
Proteobacteria_Alphaproteobacteria_Dongiales	0.0562	-0.0813	-0.0832	0.0893	-0.0862	0.0594	0.1182.	0.3274***	0.0343	0.0273	-0.2051**	-0.2278***
Proteobacteria_Alphaproteobacteria_Elsterales	-0.1856**	-0.0555	-0.1761**	-0.224***	-0.2668***	-0.2699***	0.3461***	0.0075	-0.0987	0.3208***	-0.1366*	-0.1252*
Proteobacteria_Alphaproteobacteria_Holosporales	0.0591	0.116.	0.1778**	0.1264*	0.1347*	0.0917	-0.169**	-0.0584	-0.0615	0.0196	-0.0389	-0.0702
Proteobacteria_Alphaproteobacteria_Micavibrionales	-0.1044.	-0.0267	-0.1675**	-0.0342	-0.2572***	-0.1409*	0.2569***	0.0282	0.0454	0.0722	-0.0373	-0.0746
Proteobacteria_Alphaproteobacteria_Micropepsales	-0.3383***	0.0736	-0.1398*	-0.269***	-0.1465*	-0.3368***	0.1604*	-0.4617***	-0.0885	0.3155***	-0.0085	-0.0862
Proteobacteria_Alphaproteobacteria_NA	0.1974**	0.2328***	0.3602***	-0.1589*	0.2413***	0.0655	-0.1784**	-0.2526***	-0.3522***	0.3278***	0.1294*	0.0961
Proteobacteria_Alphaproteobacteria_Paracaedibacterales	-0.0355	0.0581	-0.0043	0.0504	-0.038	-0.0952	0.0021	-0.1435*	-0.0237	0.1208.	-0.0489	-0.0917
Proteobacteria_Alphaproteobacteria_Parvibaculales	-0.0177	0.0021	0.0312	0.0091	0.0273	-0.005	0.0109	-0.0579	-0.0104	-0.0182	-0.0083	-0.0203
Proteobacteria_Alphaproteobacteria_Reyranellales	-0.0295	-0.2227***	0.0229	0.2163***	0.1173.	0.0997	-0.3472***	0.1534*	0.2437***	-0.2846***	-0.1617*	-0.0443
Proteobacteria_Alphaproteobacteria_Rhizobiales	-0.2851***	-0.1647**	-0.3124***	-0.0326	-0.143*	-0.1804**	0.1261*	-0.0852	0.199**	-0.0282	-0.0485	-0.0428
Proteobacteria_Alphaproteobacteria_Rhodobacterales	0.0778	0.0907	0.1376*	-0.0656	0.1923**	0.2437***	-0.2249***	-0.0197	-0.0195	-0.039	0.0087	-0.0171
Proteobacteria_Alphaproteobacteria_Rhodospirillales	0.2481***	0.1865**	0.2344***	-0.0866	0.061	-0.2661***	0.0214	-0.387***	-0.1732**	0.1622**	0.5107***	0.5653***
Proteobacteria_Alphaproteobacteria_Rhodovibrionales	0.1836**	0.1181.	0.0389	0.2043**	0.0737	0.194**	0.081	0.1689**	-0.0788	0.0823	-0.0242	-0.0715
Proteobacteria_Alphaproteobacteria_Sneathiellales	0.1219.	0.0564	0.0083	0.082	0.0615	0.1565*	0.0072	0.1882**	-0.0657	0.1449*	-0.1036	-0.1512*
Proteobacteria_Alphaproteobacteria_Sphingomonadales	0.0193	-0.2617***	-0.1626**	0.264***	-0.3171***	0.0791	0.2208***	0.2727***	0.2633***	-0.2453***	-0.0233	-0.0549
Proteobacteria_Alphaproteobacteria_Thalassobaculales	0.276***	0.2462***	0.2925***	0.0431	0.3354***	0.2049**	-0.2263***	0.0231	-0.2857***	0.2315***	0.0372	0.005
Proteobacteria_Alphaproteobacteria_Tistrellales	0.0149	-0.1084.	-0.0722	-0.0021	-0.0636	0.2457***	-0.0147	0.2328***	0.0802	-0.0829	-0.176**	-0.2316***
Proteobacteria_Alphaproteobacteria_uncultured	-0.0974	-0.2011**	-0.14*	-0.0703	-0.1174.	-5e-04	-0.0067	0.2141***	0.1176.	-0.0016	-0.2976***	-0.2258***
Proteobacteria_Deltaproteobacteria_10bav-F6	0.043	0.0104	0.0091	0.0872	0.0013	-0.0326	0.0404	-0.0079	0.0299	-0.0534	0.0977	0.1055.
Proteobacteria_Deltaproteobacteria_Bdellovibrionales	-0.4179***	-0.3801***	-0.6141***	-0.1572*	-0.5776***	-0.2095***	0.415***	0.2374***	0.3896***	-0.0916	-0.2904***	-0.3065***
Proteobacteria_Deltaproteobacteria_Deltaproteobacteria Incertae Sedis	0.1353*	0.3597***	0.1824**	0.2292***	0.2749***	0.0478	-0.1391*	-0.2748***	-0.1346*	0.0479	0.1871**	0.1516*
Proteobacteria_Deltaproteobacteria_Desulfarculales	0.3354***	0.0105	0.1736**	0.1796**	0.2937***	0.2349***	-0.2039**	0.2036**	-0.0621	-0.028	-0.0075	0.0212
Proteobacteria_Deltaproteobacteria_Desulfobacterales	0.333***	0.1847**	0.3113***	0.2496***	0.3996***	0.4621***	-0.2717***	0.1596*	-0.1625**	-0.0466	0.0096	-0.0252
Proteobacteria_Deltaproteobacteria_Desulfovibrionales	0.1454*	0.2948***	0.285***	0.0795	0.2083***	0.1091.	-0.053	-0.248***	-0.1957**	0.0811	0.2579***	0.2166***
Proteobacteria_Deltaproteobacteria_Desulfuromonadales	0.1681**	0.3969***	0.0975	0.2449***	0.2859***	0.1665**	-0.0192	-0.0144	-0.2141***	0.2089***	-0.0609	-0.1315*
Proteobacteria_Deltaproteobacteria_DTB120	-0.0846	-0.0508	-0.0169	0.0664	-0.0065	-0.0664	-0.082	-0.0916	0.0716	-0.0742	-0.0977	-0.1042.
Proteobacteria_Deltaproteobacteria_FW113	-0.0846	-0.0508	-0.0169	0.0664	-0.0065	-0.0664	-0.082	-0.0916	0.0716	-0.0742	-0.0977	-0.1042.
Proteobacteria_Deltaproteobacteria_MBNT15	0.344***	0.0924	0.192**	0.2919***	0.3086***	0.1907**	-0.31***	0.3069***	0.0169	-0.2296***	-0.0178	0.0778
Proteobacteria_Deltaproteobacteria_Myxococcales	-0.3227***	-0.0366	-0.1006	-0.2142***	0.0152	-0.0377	-0.1146.	-0.0464	-0.009	0.1432*	-0.3505***	-0.4113***
Proteobacteria_Deltaproteobacteria_NA	-0.1014	-0.0762	-0.0338	-0.2826***	-0.0418	-0.0451	-0.0039	0.0278	-0.0563	0.1698**	-0.1304*	-0.1604*
Proteobacteria_Deltaproteobacteria_NB1-j	0.223***	-0.0446	0.0069	0.1442*	0.0946	0.264***	-0.0331	0.416***	-0.0655	0.1086.	-0.2936***	-0.3259***
Proteobacteria_Deltaproteobacteria_NKB15	0.1648**	0.1044.	0.1433*	0.2355***	0.2955***	0.157*	-0.301***	-0.0155	-0.0505	0.0107	-0.1126.	-0.1364*
Proteobacteria_Deltaproteobacteria_Oligoflexales	-0.6162***	-0.4329***	-0.6089***	-0.3608***	-0.6655***	-0.4975***	0.3423***	-0.0907	0.4183***	-0.0844	-0.2769***	-0.2858***
Proteobacteria_Deltaproteobacteria_PB19	0.0103	-0.292***	-0.1268*	0.0911	-0.0513	0.1827**	-0.1207.	0.5799***	0.2032**	-0.2622***	-0.3556***	-0.2758***
Proteobacteria_Deltaproteobacteria_RCP2-54	0.358***	0.096	0.0781	0.266***	0.1727**	0.1126.	-0.0353	0.4248***	-0.1437*	0.1431*	-0.1576*	-0.1032
Proteobacteria_Deltaproteobacteria_SAR324 clade(Marine group B)	0.057	-0.0343	-0.1046.	0.2997***	0.0113	0.1473*	-0.0886	0.2328***	0.1665**	-0.1145.	-0.1537*	-0.1989**
Proteobacteria_Deltaproteobacteria_Sva0485	0.3669***	0.3711***	0.3496***	0.0473	0.341***	-0.1368*	-0.0726	-0.3228***	-0.3135***	0.1917**	0.4384***	0.4651***
Proteobacteria_Deltaproteobacteria_Syntrophobacterales	0.2594***	0.1805**	0.3962***	0.1618*	0.4958***	0.1876**	-0.4434***	-0.2005**	-0.1382*	-0.123.	0.2072***	0.2979***
Proteobacteria_Deltaproteobacteria_TX1A-33	-0.1088.	-0.1508*	-0.0424	-0.0397	0.0379	0.0698	-0.2139***	0.0352	0.1431*	-0.1689**	-0.1443*	-0.1562*
Proteobacteria_Gammaproteobacteria_1013-28-CG33	-0.0428	-0.0134	-0.0033	-0.0722	0.0217	0.0444	0.0311	-0.0184	-0.005	-0.0134	-0.0353	-0.0409
Proteobacteria_Gammaproteobacteria_211ds20	0.0277	-0.0173	-0.1339*	0.1146.	-0.0943	-0.1434*	0.1603*	0.1265*	0.0706	0.0717	-0.0083	-0.0195
Proteobacteria_Gammaproteobacteria_Acidiferrobacterales	-0.2052**	-0.4668***	-0.5159***	-0.2552***	-0.185**	0.0538	0.0579	0.5084***	0.3432***	-0.0964	-0.4417***	-0.4175***
Proteobacteria_Gammaproteobacteria_Acidithiobacillales	-0.0262	-0.0251	-0.0667	0.0384	-0.076	-0.0887	0.0979	0.0103	0.0684	-0.0293	0.0624	0.0735
Proteobacteria_Gammaproteobacteria_Aeromonadales	0.0923	0.0832	0.1364*	-0.0268	0.0983	0.0184	-0.1245*	-0.0639	-0.1199.	0.0933	0.0562	0.0564
Proteobacteria_Gammaproteobacteria_Arenicellales	0.0332	0.0534	0.0688	-0.0382	0.1208.	0.0705	-0.1198.	0.0095	-0.0454	0.0123	0.0017	-0.0027
Proteobacteria_Gammaproteobacteria_B2M28	0.1495*	0.1052.	-0.0055	0.1384*	0.0793	0.1495*	0.0351	0.1466*	-0.072	0.1495*	-0.0757	-0.1163.
Proteobacteria_Gammaproteobacteria_Beggiatoales	0.1476*	0.1561*	0.122.	0.053	0.1377*	0.0831	-0.0338	-0.0249	-0.1109.	0.0506	0.0959	0.0654
Proteobacteria_Gammaproteobacteria_Betaproteobacteriales	-0.267***	-0.2512***	-0.1233.	-0.1365*	-0.1686**	-0.1323*	-0.0411	-0.1205.	0.151*	-0.0831	-0.1594*	-0.1174.
Proteobacteria_Gammaproteobacteria_CCD24	0.3273***	0.2469***	0.1066.	0.3325***	0.1896**	0.1185.	0.2822***	0.2757***	-0.3275***	0.3972***	-0.0132	-0.0564
Proteobacteria_Gammaproteobacteria_CCM19a	0.2001**	0.1414*	0.0609	0.1949**	0.0837	0.1774**	0.0314	0.1324*	-0.0727	0.0915	-4e-04	-0.0484
Proteobacteria_Gammaproteobacteria_Cellvibrionales	0.1083.	-0.0051	0.1005	0.015	0.1107.	0.2367***	0.0189	0.0147	-0.0891	0.0689	0.0284	-0.0333
Proteobacteria_Gammaproteobacteria_CHAB-XI-27	0.0736	0.0322	0.0694	0.0565	0.1085.	0.0114	-0.009	0.0194	-0.0874	0.0808	-0.007	0.0409
Proteobacteria_Gammaproteobacteria_Chromatiales	0.011	0.0204	0.0073	0.0202	-0.0534	-0.0757	-0.0017	-0.1068.	0.0367	-0.0367	0.0903	0.1089.
Proteobacteria_Gammaproteobacteria_Competibacterales	0.1781**	0.0384	0.0878	0.0736	0.0613	-0.0608	-0.0289	-0.0138	-0.0381	0.0535	0.1211.	0.1545*
Proteobacteria_Gammaproteobacteria_Coxiellales	0.2963***	0.2183***	0.3117***	0.3042***	0.3394***	0.3119***	-0.258***	0.0192	-0.1019	-0.0792	0.1152.	0.1008
Proteobacteria_Gammaproteobacteria_Diplorickettsiales	-0.205**	-0.1446*	-0.0086	-0.276***	-0.0277	0.1643**	-0.1323*	-0.038	0.0156	0.0666	-0.2571***	-0.3455***
Proteobacteria_Gammaproteobacteria_EC3	0.0421	0.0385	-0.0041	0.0645	0.0087	-0.0667	0.0043	0.0445	-0.0182	0.057	-0.0165	-0.0037
Proteobacteria_Gammaproteobacteria_Ectothiorhodospirales	0.2099***	0.0673	0.2707***	0.1436*	0.1783**	0.2326***	-0.2118***	0.2643***	-0.1928**	0.04	-0.1565*	-0.104.
Proteobacteria_Gammaproteobacteria_Enterobacteriales	0.0739	0.0403	0.0556	0.1202.	0.0643	0.0334	-0.0652	-0.0341	-0.0256	0.0287	-0.0201	-0.0232
Proteobacteria_Gammaproteobacteria_eub62A3	-0.0194	-0.0119	0.0421	-0.1158.	-0.0028	0.0425	-0.0777	-0.0821	-0.0248	-0.0079	0.029	0.0021
Proteobacteria_Gammaproteobacteria_EV818SWSAP88	-0.0847	-0.0828	-0.0208	-0.1328*	-0.0682	0.0053	-0.0499	-0.0587	0.0272	-0.0068	-0.0385	-0.044
Proteobacteria_Gammaproteobacteria_Ga0077536	0.0391	0.0231	0.0276	0.1428*	0.0313	0.0689	-0.101	0.0595	0.0254	0.0168	-0.1241*	-0.1403*
Proteobacteria_Gammaproteobacteria_Gammaproteobacteria Incertae Sedis	0.0265	-0.0871	0.0041	0.0851	0.0929	0.2184***	-0.0816	0.2525***	0.0115	0.0195	-0.2662***	-0.2969***
Proteobacteria_Gammaproteobacteria_HOC36	0.3586***	0.3415***	0.5002***	-0.0213	0.3672***	0.0643	-0.2008**	-0.3459***	-0.3531***	0.1413*	0.4542***	0.4697***
Proteobacteria_Gammaproteobacteria_I3A	-0.1003	-0.0065	-0.0885	-0.0846	-0.0846	-0.1055.	0.082	0.0092	0.0091	0.0612	-0.0326	-0.0247
Proteobacteria_Gammaproteobacteria_JG36-GS-52	0.0216	-0.0389	-0.2544***	0.1554*	-0.1851**	-0.0617	0.3709***	0.2492***	0.0163	0.2256***	-0.1261*	-0.1843**
Proteobacteria_Gammaproteobacteria_JG36-TzT-191	-0.1345*	0.0424	-0.0891	-0.0775	-0.0366	-0.1142.	0.0033	-0.0879	0.0426	0.0532	-0.0654	-0.0707
Proteobacteria_Gammaproteobacteria_KF-JG30-C25	0.0888	0.0506	0.0447	0.0704	0.0542	0.0491	0.0137	0.0564	-0.0509	0.0466	0.0184	0.0396
Proteobacteria_Gammaproteobacteria_KI89A clade	0.4404***	0.3374***	0.388***	0.2661***	0.4352***	0.2312***	-0.135*	0.0667	-0.3186***	0.2106***	0.1737**	0.1793**
Proteobacteria_Gammaproteobacteria_Legionellales	-0.1126.	-0.1584*	-0.1153.	0.1173.	-0.176**	0.1016	-0.0042	0.0851	0.2211***	-0.2054**	-0.1061.	-0.1808**
Proteobacteria_Gammaproteobacteria_MBMPE27	-0.1382*	-0.1797**	-0.169**	-0.0886	-0.1391*	-0.0763	-0.0382	0.0676	0.194**	-0.1119.	-0.0467	-0.0555
Proteobacteria_Gammaproteobacteria_Methylococcales	-0.0833	-0.119.	-0.2813***	0.1068.	-0.0492	0.168**	-0.0391	0.4419***	0.199**	-0.0726	-0.4872***	-0.5367***
Proteobacteria_Gammaproteobacteria_NA	0.1619*	0.1946**	0.2101***	0.0687	0.1563*	0.0524	-0.0675	-0.0822	-0.1945**	0.1747**	0.1121.	0.0861
Proteobacteria_Gammaproteobacteria_Nitrosococcales	-0.0087	-0.0573	-0.0331	0.0357	0.0265	0.0346	-0.0608	0.0113	0.0348	-0.0283	-0.1075.	-0.1111.
Proteobacteria_Gammaproteobacteria_Oceanospirillales	0.0919	0.0788	0.0656	0.0284	0.0598	0.2123***	0.0224	0.1396*	-0.066	0.0152	-0.0491	-0.11.
Proteobacteria_Gammaproteobacteria_Piscirickettsiales	-0.1227.	-0.0935	-0.0436	0.1328*	-0.0449	-0.1408*	-0.0739	-0.1884**	0.1327*	-0.1274*	-0.0926	-0.1208.
Proteobacteria_Gammaproteobacteria_PLTA13	0.2639***	0.1254*	0.0125	0.214***	0.1446*	0.2442***	0.0627	0.2389***	-0.1195.	0.216***	-0.0854	-0.139*
Proteobacteria_Gammaproteobacteria_Pseudomonadales	-0.054	-0.1951**	-0.2702***	0.1168.	-0.1728**	0.0625	0.2476***	0.1904**	0.1403*	0.0264	-0.1505*	-0.2153***
Proteobacteria_Gammaproteobacteria_R7C24	0.0851	-0.0621	-0.115.	0.2632***	-0.0432	0.0817	0.0864	0.2735***	0.1323*	-0.0946	-0.0664	-0.0771
Proteobacteria_Gammaproteobacteria_Salinisphaerales	-0.2252***	-0.0209	-0.1496*	-0.1487*	-0.1709**	-0.232***	0.0343	-0.1689**	0.0293	0.1349*	-0.1928**	-0.2605***
Proteobacteria_Gammaproteobacteria_sediment-surface35	0.0664	-0.0299	-0.0326	0.0482	0.0247	0.0794	0.0742	0.0641	-0.0352	0.0456	-0.0143	-0.03
Proteobacteria_Gammaproteobacteria_Steroidobacterales	0.182**	0.0483	0.0949	0.3265***	0.3526***	0.4116***	-0.3986***	0.2064***	0.0878	-0.1599*	-0.1925**	-0.2049**
Proteobacteria_Gammaproteobacteria_Tenderiales	0.0628	0.0387	-0.1258*	0.0906	-0.0713	-4e-04	0.2141***	0.0921	-0.0614	0.2015**	-0.0503	-0.0898
Proteobacteria_Gammaproteobacteria_uncultured	0.1419*	0.0888	0.1728**	0.1214.	0.1305*	0.2006**	-0.0642	0.0456	-0.119.	0.072	0.0334	-0.021
Proteobacteria_Gammaproteobacteria_WD260	-0.2559***	0.0082	-0.2343***	-0.1394*	-0.2379***	-0.2676***	0.2401***	-0.1233.	0.041	0.1232.	-0.0628	-0.1046.
Proteobacteria_Gammaproteobacteria_WN-HWB-116	0.0664	-0.0299	-0.0326	0.0482	0.0247	0.0794	0.0742	0.0641	-0.0352	0.0456	-0.0143	-0.03
Proteobacteria_Gammaproteobacteria_Xanthomonadales	-0.2482***	-0.281***	-0.2581***	0.0437	-0.4452***	-0.1578*	0.2828***	-0.1102.	0.3314***	-0.2262***	0.0973	0.0597
Proteobacteria_NA_NA	-0.1907**	-0.1745**	-0.1871**	-0.007	-0.0699	-0.0401	-0.0703	0.0036	0.2214***	-0.1225.	-0.1947**	-0.2311***
Rokubacteria_NC10_Methylomirabilales	0.1402*	0.0103	0.0487	0.161*	0.2834***	0.2239***	-0.2727***	0.0996	0.0234	-0.0996	-0.0842	-0.0853
Rokubacteria_NC10_Rokubacteriales	-0.0441	-0.1503*	-0.2048**	-0.188**	-0.2164***	-0.2042**	0.2644***	0.2705***	-0.0425	0.2365***	-0.2432***	-0.2252***
Schekmanbacteria_Candidatus Schekmanbacteria bacterium RIFCSPLOWO2_02_FULL_38_14_Candidatus Schekmanbacteria bacterium RIFCSPLOWO2_02_FULL_38_14	-0.1291*	-0.1001	-0.1818**	-0.0907	-0.1571*	-0.1026	0.1326*	0.0419	0.11.	-0.0304	-0.0699	-0.0676
Schekmanbacteria_NA_NA	0.0977	0.0664	0.0742	0.056	0.1055.	0.0065	-0.0977	0.0406	-0.0664	0.0742	-0.0273	0.0039
Schekmanbacteria_uncultured bacterium_uncultured bacterium	0.0518	0.0747	-0.0869	0.098	-0.0244	0.0204	0.119.	0.121.	-0.0133	0.1272*	-0.0813	-0.1194.
Spirochaetes_Brachyspirae_Brachyspirales	-0.044	-0.0349	0.0019	0.0645	-0.0426	-0.0811	-0.081	-0.1066.	0.0941	-0.0996	-0.005	-0.017
Spirochaetes_Leptospirae_Leptospirales	0.3258***	0.3429***	0.317***	0.2849***	0.3984***	0.2501***	-0.0875	-0.1116.	-0.2906***	0.1973**	0.1795**	0.0685
Spirochaetes_MVP-15_NA	-0.0951	-0.0977	-0.0885	-0.0977	-0.069	0.0482	-0.0169	0.0092	0.0977	-0.1003	-0.0742	-0.0899
Spirochaetes_MVP-15_uncultured bacterium	-0.1118.	-0.0748	-0.1016	0.0519	-0.0979	-0.1301*	0.0273	-0.036	0.1047.	-0.037	-0.0852	-0.081
Spirochaetes_NA_NA	0.0977	0.0664	0.0742	0.056	0.1055.	0.0065	-0.0977	0.0406	-0.0664	0.0742	-0.0273	0.0039
Spirochaetes_Spirochaetia_Brevinematales	0.1741**	0.2064***	0.1526*	0.1059.	0.1187.	0.0524	-0.0361	-0.1768**	-0.1276*	0.0828	0.1898**	0.1221.
Spirochaetes_Spirochaetia_Spirochaetales	0.3931***	0.3736***	0.3384***	0.3685***	0.3695***	0.1081.	-0.0825	-0.1756**	-0.2676***	0.1881**	0.2722***	0.212***
Spirochaetes_V2072-189E03_NA	0.1555*	0.1031	0.0447	0.0874	0.1165.	0.1485*	0.0879	0.08	-0.1365*	0.1835**	0.0039	-0.0389
Spirochaetes_V2072-189E03_uncultured Spirochaetales bacterium	0.1081.	0.1519*	0.1613*	0.1439*	0.1406*	0.0583	-0.109.	-0.126*	-0.0828	0.0038	0.1026	0.0536
TA06_NA_NA	0.1961**	0.1763**	0.1659**	0.0785	0.197**	0.1167.	-0.0632	-0.0858	-0.1678**	0.0579	0.1674**	0.1607*
TA06_uncultured bacterium SHA-114_uncultured bacterium SHA-114	-0.036	-0.0918	-0.0855	-0.0476	-0.0278	0.0246	-0.101	0.0515	0.1277*	-0.1085.	-0.0519	-0.0673
TA06_uncultured bacterium_uncultured bacterium	0.1805**	0.3868***	0.2722***	0.1338*	0.364***	0.0606	-0.2505***	-0.3138***	-0.1863**	0.0497	0.2118***	0.157*
TA06_uncultured soil bacterium_uncultured soil bacterium	0.193**	0.2627***	0.3744***	0.2213***	0.2837***	-0.0503	-0.1919**	-0.2651***	-0.2458***	0.1278*	0.1867**	0.2617***
Tenericutes_Mollicutes_Haloplasmatales	0.043	0.0104	0.0091	0.0872	0.0013	-0.0326	0.0404	-0.0079	0.0299	-0.0534	0.0977	0.1055.
Tenericutes_Mollicutes_Izimaplasmatales	0.1055.	0.0742	-0.0039	0.0977	0.056	0.1055.	0.0247	0.1034	-0.0508	0.1055.	-0.0534	-0.0821
Tenericutes_Mollicutes_Mollicutes RF39	0.0629	-0.0204	-0.0094	0.0517	-0.0201	0.0225	0.0298	0.0041	0.0182	-0.0144	0.0532	0.0348
Tenericutes_Mollicutes_Mycoplasmatales	0.0481	0.0755	0.091	0.1008	0.0668	0.0198	-0.0677	-0.0146	-0.0228	-0.0132	-0.0049	0.0111
Tenericutes_Mollicutes_NA	0.0479	0.049	0.05	0.0072	0.0574	-0.0238	-0.0372	-0.0408	-0.0443	0.037	0.0497	0.0847
uncultured_uncultured bacterium_uncultured bacterium	-0.0753	-0.0844	-0.0914	-0.1517*	-0.0926	0.0425	-0.0237	-0.0437	0.0979	-0.1354*	-0.0034	-0.0426
Verrucomicrobia_Verrucomicrobiae_B29	0.0331	0.0553	0.0302	-0.0097	-0.0186	-0.0316	-0.0068	6e-04	-0.0559	0.0567	0.0055	-0.0152
Verrucomicrobia_Verrucomicrobiae_Chthoniobacterales	-0.0619	0.049	0.0875	-0.3964***	-0.1989**	-0.3934***	0.2535***	-0.2597***	-0.2538***	0.3717***	0.1695**	0.1876**
Verrucomicrobia_Verrucomicrobiae_Methylacidiphilales	-0.0519	0.0915	-0.0613	0.0151	-0.0849	-0.0905	0.2079***	-0.076	-0.0698	0.1284*	0.0066	-0.0482
Verrucomicrobia_Verrucomicrobiae_NA	0.1754**	0.1477*	0.186**	0.1697**	0.1292*	0.0256	-0.0857	-0.045	-0.0812	0.0042	0.1459*	0.1557*
Verrucomicrobia_Verrucomicrobiae_Opitutales	-0.3695***	-0.1012	-0.2596***	-0.1896**	-0.3054***	-0.4147***	0.237***	-0.2532***	0.0551	0.2108***	-0.1702**	-0.169**
Verrucomicrobia_Verrucomicrobiae_Pedosphaerales	0.3393***	0.4927***	0.639***	-0.0479	0.4483***	-0.0656	-0.2232***	-0.4048***	-0.6098***	0.4416***	0.3308***	0.3941***
Verrucomicrobia_Verrucomicrobiae_S-BQ2-57 soil group	0.0053	0.2368***	0.1503*	-0.0965	0.0412	-0.1425*	-0.042	-0.2481***	-0.2182***	0.2242***	0.052	0.0206
Verrucomicrobia_Verrucomicrobiae_UA11	0.0299	0.0586	0.0664	-0.0195	0.069	0.0195	-0.0716	-0.0353	-0.043	0.0352	0.0117	0.0195
Verrucomicrobia_Verrucomicrobiae_uncultured	0.0151	-0.0861	-0.0595	0.1248*	0.0279	0.0491	0.0281	0.0058	0.0159	-0.004	-0.1065.	-0.1337*
Verrucomicrobia_Verrucomicrobiae_Verrucomicrobiales	0.1454*	-0.006	-0.0892	0.1969**	-0.0836	0.1443*	0.1429*	0.2354***	0.1092.	-0.0785	0.0107	-0.0411
WOR-1_candidate division WOR-1 bacterium RIFCSPHIGHO2_01_FULL_53_15_candidate division WOR-1 bacterium RIFCSPHIGHO2_01_FULL_53_15	0.1384*	0.0941	0.1052.	0.0793	0.1495*	0.0092	-0.1384*	0.0575	-0.0941	0.1052.	-0.0387	0.0055
WOR-1_candidate division WOR-1 bacterium RIFOXYA12_FULL_43_27_candidate division WOR-1 bacterium RIFOXYA12_FULL_43_27	-0.0813	-0.0254	0.0185	0.0661	0.0321	-0.0661	-0.1367*	-0.127*	0.0586	-0.0662	-0.1069.	-0.11.
WOR-1_NA_NA	0.0676	0.1057.	0.0418	0.1023	0.1864**	0.1111.	-0.1198.	-0.0775	-0.0722	0.0504	-0.0473	-0.122.
WOR-1_uncultured bacterium_uncultured bacterium	0.1799**	0.2781***	0.315***	0.13*	0.303***	0.0561	-0.2775***	-0.2234***	-0.2084***	0.0988	0.0825	0.0497
WPS-2_bacterium ADurb.Bin236_bacterium ADurb.Bin236	-0.0716	0.0326	-0.0586	-0.0716	-0.1003	-0.0794	0.0898	-0.0916	-0.0143	0.0664	-0.0039	-0.0195
WPS-2_Burkholderiales bacterium Beta_02_Burkholderiales bacterium Beta_02	-0.0681	3e-04	0.0131	0.0589	-0.0315	-0.0478	-0.0236	-0.0703	0.0607	-0.0811	-0.0161	-0.0059
WPS-2_hydrothermal vent metagenome_hydrothermal vent metagenome	0.0872	0.0977	0.1029	-0.0117	0.0924	0.0664	-0.0638	-0.0589	-0.082	-0.0039	0.1055.	0.0664
WPS-2_metagenome_metagenome	-0.1318*	-0.1689**	-0.1919**	-0.0582	-0.1852**	-0.0814	0.0568	0.1449*	0.1753**	-0.1239*	-0.1181.	-0.1275*
WPS-2_NA_NA	-0.0892	-0.0501	-0.0096	-0.0308	-0.0794	-0.1098.	-0.0184	-0.2086***	0.0356	0.0032	0.0604	0.0598
WPS-2_uncultured bacterium_uncultured bacterium	-0.1476*	0.0122	0.0358	-0.2465***	-0.121.	-0.2156***	0.0669	-0.2752***	-0.1243*	0.2694***	0.0241	0.0245
WPS-2_uncultured forest soil bacterium_uncultured forest soil bacterium	-0.0986	-0.0123	-0.1181.	-0.0842	-0.1459*	-0.1392*	0.1432*	0.0145	0.0467	0.0283	-0.0689	-0.0795
WS1_metagenome_metagenome	-0.0582	-0.0042	-0.02	-0.0988	-0.0642	-0.0856	0.0344	-0.1127.	0.0085	0.042	0.0623	0.0582
WS1_NA_NA	-0.015	-0.0102	-0.0147	-0.0225	-0.0444	0.0291	-0.0693	-0.0193	0.0632	-0.0714	-0.0491	-0.087
WS1_uncultured actinobacterium_uncultured actinobacterium	0.0977	0.0664	0.0742	0.056	0.1055.	0.0065	-0.0977	0.0406	-0.0664	0.0742	-0.0273	0.0039
WS1_uncultured Armatimonadetes bacterium_uncultured Armatimonadetes bacterium	0.0872	0.0977	0.1029	-0.0117	0.0924	0.0664	-0.0638	-0.0589	-0.082	-0.0039	0.1055.	0.0664
WS1_uncultured bacterium SJA-43_uncultured bacterium SJA-43	0.0349	-0.0119	-0.0124	0.1501*	-0.0546	0.0358	0.0298	0.022	0.015	0.0228	-0.0582	-0.0786
WS1_uncultured bacterium_uncultured bacterium	-0.0471	-0.012	-0.0421	-0.0273	0.0303	0.0414	-0.0848	0.0038	0.0819	-0.0894	-0.0894	-0.1023
WS1_uncultured Streptomyces sp._uncultured Streptomyces sp.	0.0323	0.0076	-0.0061	0.0228	-0.0724	-0.0679	0.0505	0.0187	0.0439	-0.0278	0.0765	0.0727
WS2_NA_NA	0.0117	0.0138	0.049	0.0956	0.0165	0.0587	0.04	0.04	-0.0015	-0.0308	0.0381	0.072
WS2_uncultured bacterium_uncultured bacterium	0.2164***	0.1888**	0.2077***	0.2604***	0.2035**	0.1515*	-0.1096.	0.004	-0.1589*	0.0891	-0.0059	-0.0522
WS2_uncultured Firmicutes bacterium_uncultured Firmicutes bacterium	0.104.	-0.0584	0.0302	0.1386*	0.0893	0.2625***	-0.1042.	0.2219***	0.0303	-0.087	-0.1486*	-0.1843**
WS2_uncultured microorganism_uncultured microorganism	0.073	-0.0113	-0.0164	0.0989	-0.0138	-0.01	0.0305	0.042	0.0667	-0.0749	0.0827	0.0867
WS2_uncultured soil bacterium_uncultured soil bacterium	-0.1036	0.0062	-0.1185.	-0.0826	-0.1885**	-0.2015**	0.1723**	-0.1136.	0.0046	0.1134.	0.0271	0.0194
WS4_metagenome_metagenome	0.0716	0.1029	0.1081.	-0.0534	0.082	0.0534	-0.0117	-0.0916	-0.0977	0.0221	0.0638	0.0404
WS4_NA_NA	-0.1099.	-0.0204	-0.0229	-0.1651**	-0.099	-0.0652	-0.0063	-0.1479*	-0.0295	0.1044.	-0.005	-0.0168
WS4_uncultured bacterium_uncultured bacterium	0.1337*	0.0988	0.1332*	0.1086.	0.0052	0.1313*	-0.0328	0.0781	-0.0512	-0.028	0.0091	-0.026
WS4_uncultured Clostridia bacterium_uncultured Clostridia bacterium	0.0242	-0.0314	0.0515	-0.0347	0.002	-0.072	-0.0256	-0.019	-0.046	0.0551	0.0425	0.0814
WS4_uncultured organism_uncultured organism	0.0368	-0.028	0.0266	-0.0103	-0.0323	-0.0052	-0.0069	-0.0502	-0.0194	0.0407	0.0548	0.0443
Zixibacteria_bacterium enrichment culture clone Anammox_55_bacterium enrichment culture clone Anammox_55	0.1967**	0.2138***	0.1719**	0.0703	0.16*	0.0104	-0.1008	-0.1613*	-0.1692**	0.2243***	0.1175.	0.0525
Zixibacteria_bioreactor metagenome_bioreactor metagenome	0.0468	0.1331*	0.165**	0.0333	0.1571*	0.0613	-0.1249*	-0.1835**	-0.0973	-0.0016	0.0701	0.0318
Zixibacteria_candidate division Zixibacteria bacterium RBG-1_candidate division Zixibacteria bacterium RBG-1	0.0977	0.0664	0.0742	0.056	0.1055.	0.0065	-0.0977	0.0406	-0.0664	0.0742	-0.0273	0.0039
Zixibacteria_NA_NA	0.241***	0.2014**	0.1343*	0.1527*	0.171**	0.1537*	-0.0535	-0.0174	-0.1505*	0.096	0.0968	0.1107.
Zixibacteria_uncultured bacterium_uncultured bacterium	0.3849***	0.4288***	0.4815***	0.1599*	0.4119***	0.2069***	-0.1792**	-0.1147.	-0.4712***	0.3538***	0.0753	0.0235
Zixibacteria_uncultured candidate division TA06 bacterium_uncultured candidate division TA06 bacterium	0.2972***	0.4241***	0.4587***	0.0958	0.4528***	0.2167***	-0.2313***	-0.3029***	-0.4017***	0.1583*	0.2592***	0.1796**
Zixibacteria_uncultured delta proteobacterium_uncultured delta proteobacterium	0.1486*	0.1228.	0.296***	0.0808	0.29***	0.1304*	-0.2194***	-0.0463	-0.1448*	-0.0202	0.0066	0.0155
Zixibacteria_uncultured prokaryote_uncultured prokaryote	0.1408*	0.1231.	0.1318*	0.1859**	-0.0524	0.0042	0.0988	0.0747	-0.1349*	0.1377*	0.1223.	0.1354*
Fungi	Ca	CEC	Clay	K	Mg	Na	P2O5	pH	Sand	Silt	SOM	TN
Ascomycota_Archaeorhizomycetes_Archaeorhizomycetales	-0.038	0.0532	0.0228	0.0076	-0.0532	-0.0228	0.0532	0	0.038	-0.0532	0.0684	0.1139
Ascomycota_Arthoniomycetes_unidentified	NaN	NaN	NaN	NaN	NaN	NaN	NaN	NaN	NaN	NaN	NaN	NaN
Ascomycota_Dothideomycetes_Botryosphaeriales	-0.038	0.0532	0.0228	0.0076	-0.0532	-0.0228	0.0532	0	0.038	-0.0532	0.0684	0.1139
Ascomycota_Dothideomycetes_Capnodiales	-0.1575*	-0.3804***	-0.2045**	-0.0561	-0.2968***	0.0721	0.1561*	0.1952*	0.3192***	-0.3766***	0.0881	0.0799
Ascomycota_Dothideomycetes_Dothideales	0.0071	0.0506	0.0316	0.0978	-0.025	-0.062	-0.0647	-0.0601	0.0361	-0.0371	-0.0324	-0.02
Ascomycota_Dothideomycetes_Dothideomycetes_ord_Incertae_sedis	0.1877*	0.057	-0.1402.	0.1575*	0.0338	0.2165**	0.1692*	0.2607***	-0.0716	0.2071**	-0.1646*	-0.1857*
Ascomycota_Dothideomycetes_Hysteriales	-0.0076	0.0076	0.0532	-0.0835	0.0532	-0.038	0.0835	-0.0306	-0.0987	0.1139	0.0532	0.0532
Ascomycota_Dothideomycetes_Myriangiales	-0.0684	-0.038	-0.1139	0.038	-0.1139	-0.1291	0.1291	0.0382	0.0684	0.0076	-0.0076	-0.0228
Ascomycota_Dothideomycetes_Mytilinidales	0.3845***	0.0496	-0.0334	0.2822***	0.2672***	0.2804***	0.1271	0.3161***	-0.2174**	0.2611***	-0.1208	-0.1257
Ascomycota_Dothideomycetes_NA	0.1653*	-0.079	0.0772	-0.0028	-0.0838	0.0162	0.0495	0.0671	-0.0519	0.0116	0.1779*	0.1818*
Ascomycota_Dothideomycetes_Pleosporales	-0.0219	-0.2199**	0.04	-0.0609	-0.2097**	-0.0318	0.1355.	-0.0037	0.0576	-0.2029**	0.2401**	0.1949*
Ascomycota_Dothideomycetes_Tubeufiales	NaN	NaN	NaN	NaN	NaN	NaN	NaN	NaN	NaN	NaN	NaN	NaN
Ascomycota_Dothideomycetes_unidentified	NaN	NaN	NaN	NaN	NaN	NaN	NaN	NaN	NaN	NaN	NaN	NaN
Ascomycota_Dothideomycetes_Venturiales	-0.0129	0.1663*	0.3451***	-0.2021**	0.332***	-0.2568***	-0.1296	-0.4348***	-0.428***	0.4311***	0.1003	0.1512.
Ascomycota_Eurotiomycetes_Chaetothyriales	-0.0034	-0.0297	0.2995***	-0.1013	0.1236	0.1649*	-0.049	-0.1989*	-0.164*	-0.1217	0.2575***	0.1981*
Ascomycota_Eurotiomycetes_Eurotiales	0.0502	-0.3183***	-0.0291	0.1699*	0.0856	0.0492	-0.2617***	0.1315.	0.0161	0.0673	-0.3916***	-0.3703***
Ascomycota_Eurotiomycetes_NA	-0.1139	-0.0835	-0.0532	0.0835	-0.0228	-0.0987	-0.0987	-0.1146	0.0987	-0.0987	-0.1291	-0.1291
Ascomycota_Eurotiomycetes_Onygenales	-0.0039	-0.0458	-0.0704	0.0513	-0.0832	0.0205	0.1607*	0.074	5e-04	0.0205	-0.073	-0.094
Ascomycota_Eurotiomycetes_Verrucariales	-0.0224	-0.0329	-0.0112	0.1506.	-0.0109	-9e-04	-0.0223	-0.0172	0.0651	-0.0972	-0.0654	-0.0868
Ascomycota_Lecanoromycetes_Lecanorales	NaN	NaN	NaN	NaN	NaN	NaN	NaN	NaN	NaN	NaN	NaN	NaN
Ascomycota_Leotiomycetes_Helotiales	-0.3087***	-0.2661***	0.0723	-0.2853***	-0.0047	-0.2664***	-0.1974*	-0.3068***	0.0309	0.0159	0.0017	0.08
Ascomycota_Leotiomycetes_NA	-0.6148***	-0.2743***	-0.1021	-0.6036***	-0.1233	-0.292***	-0.2674***	-0.5462***	0.1089	-0.0854	-0.1915*	-0.2072**
Ascomycota_Leotiomycetes_Thelebolales	-0.0455	-0.0886	-0.0618	0.1231	0.1256	0.14.	-0.4629***	0.0244	0.3536***	-0.5583***	-0.0505	-0.0302
Ascomycota_Leotiomycetes_unidentified	-0.0217	0.0219	0.0109	0.0215	-0.0968	-0.0752	0.0219	-0.0485	0.086	-0.0968	0.1184	0.1509.
Ascomycota_NA_NA	-0.1402.	-0.1413.	-0.0059	-0.1388.	0.0104	-0.1508.	0.0059	-0.2102**	-0.1038	0.1776*	-0.0844	-0.0599
Ascomycota_Orbiliomycetes_Orbiliales	-0.0493	-0.1806*	-0.0193	0.0831	-0.0311	0.1026	-0.1077	0.063	0.1515.	-0.2875***	-0.1178	-0.1509.
Ascomycota_Orbiliomycetes_unidentified	0.0101	-3e-04	-0.0545	0.1181	-0.076	-0.0225	0.1403.	0.0919	0.0434	-0.0213	0.0213	-0.0109
Ascomycota_Pezizomycetes_Pezizales	0.3038***	0.2445**	-0.0218	0.5853***	0.0919	0.0379	0.1	0.2924***	0.0029	0.0563	-0.1225	-0.1412.
Ascomycota_Saccharomycetes_NA	0.0684	-0.0684	-0.0684	0.0532	0.0228	0.0835	0.0987	0.0917	-0.0228	0.038	-0.038	-0.0532
Ascomycota_Saccharomycetes_Saccharomycetales	0.3105***	0.3026***	0.1564*	0.2016*	0.3314***	0.4103***	-0.2936***	0.3586***	-0.0492	-0.092	-0.135.	-0.1131
Ascomycota_Sordariomycetes_Annulatascales	NaN	NaN	NaN	NaN	NaN	NaN	NaN	NaN	NaN	NaN	NaN	NaN
Ascomycota_Sordariomycetes_Boliniales	-0.1366.	-0.0313	-0.1898*	-0.0123	-0.2073**	-0.2163**	0.2163**	-0.0211	0.0843	0.0481	-0.022	-0.0484
Ascomycota_Sordariomycetes_Branch06	-0.0994	-0.0811	0.0021	0.1238	-0.0099	-0.123	-0.1278	-0.1564*	0.0912	-0.1078	-0.0806	-0.0742
Ascomycota_Sordariomycetes_Chaetosphaeriales	-0.0301	-0.1363.	-0.0368	-0.0128	-0.0912	-0.2947***	0.268***	-0.0068	-0.0531	0.1747*	0.1851*	0.2091**
Ascomycota_Sordariomycetes_Coniochaetales	-0.0843	-0.0922	-0.1301.	0.1938*	-0.1656*	-0.3292***	0.0295	-0.0606	0.1699*	-0.0378	-0.0938	-0.0374
Ascomycota_Sordariomycetes_Diaporthales	NaN	NaN	NaN	NaN	NaN	NaN	NaN	NaN	NaN	NaN	NaN	NaN
Ascomycota_Sordariomycetes_Glomerellales	-0.0313	-0.1342.	-0.088	-0.1353.	-0.1354.	-0.0134	0.2151**	0.0169	-0.0245	0.1502.	0.0455	0.0838
Ascomycota_Sordariomycetes_Hypocreales	0.2523**	0.0312	0.2246**	0.1748*	0.4008***	0.3555***	-0.3387***	0.1642*	-0.1234	-0.0231	-0.1837*	-0.1657*
Ascomycota_Sordariomycetes_Magnaporthales	-0.0953	-0.1056	0.307***	-0.1811*	0.0661	-0.0609	-0.135.	-0.2665***	-0.1889*	0.0423	0.0843	0.0777
Ascomycota_Sordariomycetes_Melanosporales	0.0543	0.0325	0.0646	0.0333	0.0429	0.0437	0.1077	0.0439	-0.075	0.0532	0.0646	0.0429
Ascomycota_Sordariomycetes_Microascales	-0.1049	-0.2203**	-0.4603***	0.3346***	-0.3639***	0.1479.	0.3191***	0.3966***	0.343***	-0.1735*	-0.4748***	-0.5325***
Ascomycota_Sordariomycetes_Myrmecridiales	0.2853***	0.0969	-0.1386.	0.3256***	-0.0102	0.1099	0.331***	0.1969*	-0.0177	0.0198	0.1782*	0.0897
Ascomycota_Sordariomycetes_NA	0.0072	0.1366.	-0.0984	0.2484**	-0.0848	-0.1964*	0.3501***	-0.1704*	-0.1046	0.1106	0.0334	-0.0701
Ascomycota_Sordariomycetes_Pleurotheciales	NaN	NaN	NaN	NaN	NaN	NaN	NaN	NaN	NaN	NaN	NaN	NaN
Ascomycota_Sordariomycetes_Savoryellales	0.1291	0.0987	-0.038	0.1139	0.0684	0.1291	0.0228	0.1299.	-0.0532	0.1291	-0.0835	-0.0987
Ascomycota_Sordariomycetes_Sordariales	0.0885	0.1204	-0.2454**	0.2673***	-0.1973*	0.0696	0.3501***	0.2572***	0.1446.	-0.1146	0.0844	-0.0081
Ascomycota_Sordariomycetes_Trichosphaeriales	-0.2399**	-0.2421**	-0.2091**	-0.1918*	-0.2437**	0.1213	0.1394.	0.0866	0.2468**	-0.3362***	0.0618	-0.0177
Ascomycota_Sordariomycetes_unidentified	NaN	NaN	NaN	NaN	NaN	NaN	NaN	NaN	NaN	NaN	NaN	NaN
Ascomycota_Sordariomycetes_Xylariales	0.2534**	0.1075	0.0228	0.1925*	0.267***	0.1242	-0.0394	0.178*	-0.1424.	0.1292	-0.0114	-0.0544
Ascomycota_Taphrinomycetes_Taphrinales	1e-04	0.0582	0.0502	-0.0155	0.0249	-0.1134	-0.047	-0.1388.	-0.0466	0.0354	0.032	0.0258
Ascomycota_unidentified_unidentified	NaN	NaN	NaN	NaN	NaN	NaN	NaN	NaN	NaN	NaN	NaN	NaN
Basidiomycota_Agaricomycetes_Agaricales	0.5394***	0.4021***	0.2726***	0.3861***	0.2629***	0.372***	0.0526	0.2327**	-0.2367**	0.0588	0.2457**	0.2252**
Basidiomycota_Agaricomycetes_Atheliales	0.0223	0.0654	0.0118	0.0105	0.001	-0.0422	0.0422	-0.0222	-0.0331	-1e-04	0.0868	0.0436
Basidiomycota_Agaricomycetes_Auriculariales	0.0874	-0.229**	-0.0487	0.1165	-0.1513.	-0.0675	0.0371	0.1956*	0.1563*	-0.1878*	0.0941	0.145.
Basidiomycota_Agaricomycetes_Boletales	-0.0152	-0.0524	-0.0764	0.0085	0.0218	0.059	0.0633	0.061	0.0146	-0.0065	-0.0144	-0.0375
Basidiomycota_Agaricomycetes_Cantharellales	-0.1176	-0.1267	-0.0919	0.0062	-0.2058**	-0.1591*	0.0764	-0.07	0.1158	-0.0833	-0.0398	-0.0305
Basidiomycota_Agaricomycetes_Corticiales	0.0384	-0.0642	-0.02	0.1029	-0.0988	-0.1172	0.0921	-0.0529	0.0826	-0.0829	0.2273**	0.2722***
Basidiomycota_Agaricomycetes_Geastrales	NaN	NaN	NaN	NaN	NaN	NaN	NaN	NaN	NaN	NaN	NaN	NaN
Basidiomycota_Agaricomycetes_Hymenochaetales	-0.061	-0.077	-0.0849	-0.0063	-0.0154	-0.053	0.0678	0.0351	0.0706	-0.0327	0.0464	0.0466
Basidiomycota_Agaricomycetes_NA	0.1522.	0.0812	0.3419***	-0.1065	0.1898*	-0.092	-0.0264	-0.1258	-0.3314***	0.2581***	0.1978*	0.2103**
Basidiomycota_Agaricomycetes_Phallales	0.0845	-0.0036	-0.031	0.0928	-0.0039	0.0587	0.0131	0.143.	0.0125	0.0235	-0.0411	-0.0325
Basidiomycota_Agaricomycetes_Polyporales	0.0412	-0.0664	-0.0422	0.0833	0.1153	0.1835*	-0.1414.	0.2058**	0.0393	-0.032	-0.2139**	-0.188*
Basidiomycota_Agaricomycetes_Russulales	0.0466	-0.0621	-0.0112	0.0707	-0.0559	-0.1293	0.0411	-0.003	0.0571	-0.0135	0.1655*	0.2035**
Basidiomycota_Agaricomycetes_Sebacinales	0.0112	-0.0053	0.1127	-0.094	-0.0364	0.0705	-0.1038	0.0093	-0.0119	-0.0545	0.0536	0.0613
Basidiomycota_Agaricomycetes_Thelephorales	-0.0685	-0.1979*	0.0688	-0.1415.	-0.2391**	-0.2307**	0.1123	-0.0998	-0.0024	0.0658	0.2032**	0.2642***
Basidiomycota_Agaricomycetes_Trechisporales	-0.0398	-0.1543*	-0.1013	-0.073	-0.0816	-4e-04	-0.0287	0.0106	0.1175	-0.1071	-0.0448	-0.0264
Basidiomycota_Agaricomycetes_unidentified	-0.0497	-0.1377.	0.2648***	-0.3672***	0.0679	-0.042	-0.0924	-0.0579	-0.2856***	0.2976***	0.0321	0.0888
Basidiomycota_Agaricostilbomycetes_Agaricostilbales	0.0776	0.0325	0.2619***	0.2074**	0.2319**	0.1437.	-0.2936***	-0.1961*	-0.0741	-0.2123**	0.0838	0.0202
Basidiomycota_Cystobasidiomycetes_Cystobasidiales	-0.2662***	-0.3047***	-0.1268	-0.1751*	-0.3515***	0.0502	-0.0535	-6e-04	0.4254***	-0.5975***	0.1337.	0.1456.
Basidiomycota_Cystobasidiomycetes_Cystobasidiomycetes_ord_Incertae_sedis	-0.083	-0.1267	-0.0272	0.0532	-0.1164	0.0223	-0.0436	0.0934	0.1389.	-0.1769*	-0.116	-0.0742
Basidiomycota_Cystobasidiomycetes_Erythrobasidiales	0.0254	-0.0573	0.0922	0.0849	-0.0232	-0.0447	-0.1167	0.0996	0.0624	-0.0886	-0.0909	0.0025
Basidiomycota_Cystobasidiomycetes_NA	-0.038	0.0532	0.0228	0.0076	-0.0532	-0.0228	0.0532	0	0.038	-0.0532	0.0684	0.1139
Basidiomycota_Dacrymycetes_Dacrymycetales	-0.038	0.0532	0.0228	0.0076	-0.0532	-0.0228	0.0532	0	0.038	-0.0532	0.0684	0.1139
Basidiomycota_Exobasidiomycetes_Entylomatales	NaN	NaN	NaN	NaN	NaN	NaN	NaN	NaN	NaN	NaN	NaN	NaN
Basidiomycota_Exobasidiomycetes_Tilletiales	0.0749	0.1008	0.1185	-0.0216	0.065	-0.0051	-0.1011	-0.098	-0.0388	-0.0405	0.1374.	0.1197
Basidiomycota_Geminibasidiomycetes_Geminibasidiales	-0.0098	-0.1144	-0.0649	0.1457.	0.0553	0.2797***	-0.0697	0.1938*	0.1684*	-0.2425**	-0.0685	-0.1179
Basidiomycota_Microbotryomycetes_Kriegeriales	-0.121	-0.1795*	0.0416	0.0179	0.0204	0.1309.	-0.3486***	0.1164	0.1634*	-0.331***	-0.3457***	-0.3411***
Basidiomycota_Microbotryomycetes_Leucosporidiales	0.2563***	0.3993***	0.3988***	0.0041	0.2121**	-0.0328	-0.0017	-0.3275***	-0.4339***	0.3931***	0.2633***	0.2414**
Basidiomycota_Microbotryomycetes_Microbotryales	-0.0252	-0.0239	0.0029	0.0024	-0.0725	-0.1482.	0.0041	-0.079	0.0442	-0.0089	0.1047	0.1182
Basidiomycota_Microbotryomycetes_Microbotryomycetes_ord_Incertae_sedis	-0.5811***	-0.1699*	-0.3377***	-0.301***	-0.3729***	-0.1595*	0.002	-0.1963*	0.408***	-0.4275***	-0.2163**	-0.2117**
Basidiomycota_Microbotryomycetes_NA	-0.0082	0.0446	0.3598***	-0.3407***	0.3914***	0.2611***	-0.5148***	-0.1739*	-0.082	-0.2643***	0.1859*	0.1934*
Basidiomycota_Microbotryomycetes_Sporidiobolales	-0.1965*	-0.0832	-0.0669	-0.0475	-0.1474.	-0.0279	-0.0597	-0.0516	0.2523**	-0.4108***	0.1536.	0.1106
Basidiomycota_NA_NA	-0.2251**	-0.2717***	0.1039	-0.333***	-0.061	-0.1737*	-0.0948	-0.1827*	-0.0567	0.094	0.0048	0.0718
Basidiomycota_Pucciniomycetes_Platygloeales	0.1735*	0.1829*	0.3157***	-0.1756*	0.1493.	0.1492.	-0.1984*	-0.0809	-0.2637***	-0.0053	0.1901*	0.0981
Basidiomycota_Pucciniomycetes_unidentified	0.0785	0.214**	0.0566	0.1462.	0.0299	0.0802	0.0907	0.0644	-0.0628	0.0955	0.0318	0.063
Basidiomycota_Spiculogloeomycetes_Spiculogloeales	NaN	NaN	NaN	NaN	NaN	NaN	NaN	NaN	NaN	NaN	NaN	NaN
Basidiomycota_Tremellomycetes_Cystofilobasidiales	-0.1555*	-0.0713	-0.4783***	0.1701*	-0.348***	0.0842	0.2366**	0.2892***	0.4817***	-0.3217***	-0.0993	-0.0766
Basidiomycota_Tremellomycetes_Filobasidiales	-0.6411***	-0.5204***	-0.4569***	-0.2026**	-0.4716***	-0.0372	0.1682*	0.028	0.5479***	-0.5345***	-0.2817***	-0.2688***
Basidiomycota_Tremellomycetes_Holtermanniales	0.1153	-0.0385	-0.1574*	0.1833*	-0.0915	0.13.	0.3635***	0.1751*	-0.0196	0.0609	-0.0237	-0.1037
Basidiomycota_Tremellomycetes_NA	-0.0571	0.0041	0.0841	-0.111	-0.0213	-0.0751	0.0488	-0.0846	-0.076	0.0939	0.0837	0.1187
Basidiomycota_Tremellomycetes_Tremellales	0.1452.	0.2809***	0.4738***	0.048	0.2486**	-0.1757*	-0.3301***	-0.2647***	-0.2369**	-0.0199	0.298***	0.2994***
Basidiomycota_Tremellomycetes_Trichosporonales	0.2038**	0.0778	0.0246	0.2269**	0.1343.	-0.0021	-0.0182	0.107	-0.0206	0.0261	0.083	0.1286
Basidiomycota_Tremellomycetes_unidentified	-0.4605***	-0.2836***	-0.234**	-0.2435**	-0.1684*	-0.0954	-0.2362**	-0.2816***	0.2977***	-0.2462**	-0.228**	-0.2239**
Basidiomycota_unidentified_unidentified	-0.0932	-0.1989*	-0.0716	0.1168	-0.1546*	-0.1292	-0.0338	-0.0867	0.2488**	-0.2621***	0.0486	0.0558
Basidiomycota_Ustilaginomycetes_Ustilaginales	-0.0684	-0.038	-0.1139	0.038	-0.1139	-0.1291	0.1291	0.0382	0.0684	0.0076	-0.0076	-0.0228
Basidiomycota_Wallemiomycetes_Wallemiales	0.1181	0.0642	-0.043	0.1508.	0.0428	0.0531	0.0432	0.0916	5e-04	0.0422	0.0224	0.0225
Blastocladiomycota_Blastocladiomycetes_Blastocladiales	0.1288	0.0671	-0.0046	0.1551*	-0.0033	0.0854	0.04	0.0902	0.0123	0.0059	0.0296	0.003
Cercozoa_unidentified_unidentified	0.1932*	-0.0398	-0.2347**	0.3155***	-0.0811	0.037	0.3047***	0.278***	0.0946	0.0184	0.0695	0.0378
Chytridiomycota_Chytridiomycetes_Chytridiales	-0.0661	-0.0394	-0.0396	-0.0926	-0.0118	0.0377	-0.023	-0.0238	0.0668	-0.1149	-0.0104	-0.0036
Chytridiomycota_Chytridiomycetes_unidentified	0.0668	-0.1366.	-0.0756	0.0316	-0.0126	0.1107	0.0936	0.173*	-0.0136	0.0313	-0.1011	-0.1101
Chytridiomycota_NA_NA	0.2352**	0.1282	0.0191	0.2831***	0.1819*	0.0387	-0.0664	0.1805*	-0.0771	0.1507.	-0.1325.	-0.1116
Chytridiomycota_Rhizophlyctidomycetes_Rhizophlyctidales	0.1074	0.0535	0.0533	0.1187	0.0856	-0.0433	-0.0639	0.0431	-0.021	0.0101	0.0438	0.0868
Chytridiomycota_Rhizophydiomycetes_Rhizophydiales	-0.1524.	0.0212	0.3363***	-0.1389.	0.2974***	0.0763	-0.3689***	-0.3402***	-0.1655*	-0.0622	0.0927	0.0982
Chytridiomycota_Spizellomycetes_Spizellomycetales	NaN	NaN	NaN	NaN	NaN	NaN	NaN	NaN	NaN	NaN	NaN	NaN
Chytridiomycota_unidentified_unidentified	0.0848	0.0907	0.1069	0.2345**	0.1213	0.0566	-0.0889	0.1558*	0.0143	-0.102	-0.0655	-0.0048
Entomophthoromycota_Basidiobolomycetes_Basidiobolales	0.0119	0.0069	0.0898	-0.0539	0.0582	-0.1003	0.0449	-0.086	-0.0849	0.0917	0.1499.	0.1748*
Glomeromycota_Archaeosporomycetes_Archaeosporales	-0.3767***	-0.414***	0.0435	-0.2681***	-0.2105**	-0.2857***	-0.2616***	-0.2314**	0.0511	0.0265	-0.324***	-0.2706***
Glomeromycota_Glomeromycetes_Diversisporales	NaN	NaN	NaN	NaN	NaN	NaN	NaN	NaN	NaN	NaN	NaN	NaN
Glomeromycota_Glomeromycetes_Glomerales	0.0168	-0.074	0.015	0.0326	0.0504	-0.0163	-0.0375	0.0558	-0.036	0.0497	-0.1218	-0.1016
Glomeromycota_Paraglomeromycetes_Paraglomerales	-0.1522.	-0.0534	0.043	0.0439	0.0341	-0.1704*	-0.154.	-0.1891*	0.0324	-0.0446	-0.1446.	-0.0937
Monoblepharomycota_Monoblepharidomycetes_Monoblepharidales	-0.0035	-0.0742	-0.0746	0.0762	0.0129	0.0032	-0.021	0.0351	0.1275	-0.1453.	0.094	0.1117
Monoblepharomycota_Monoblepharidomycetes_NA	NaN	NaN	NaN	NaN	NaN	NaN	NaN	NaN	NaN	NaN	NaN	NaN
Monoblepharomycota_Monoblepharidomycetes_unidentified	NaN	NaN	NaN	NaN	NaN	NaN	NaN	NaN	NaN	NaN	NaN	NaN
Mortierellomycota_Mortierellomycetes_Mortierellales	0.1645*	0.2539**	0.3005***	0.0046	0.2932***	-0.2066**	0.0251	-0.2826***	-0.4875***	0.4457***	0.0839	0.0566
Mucoromycota_Endogonomycetes_Endogonales	-0.0162	-0.0661	-0.0178	0.0456	0.1364.	0.0991	-0.2626***	0.0445	0.1433.	-0.1783*	-0.1088	-0.0396
Mucoromycota_Mucoromycetes_Mucorales	NaN	NaN	NaN	NaN	NaN	NaN	NaN	NaN	NaN	NaN	NaN	NaN
Mucoromycota_Umbelopsidomycetes_Umbelopsidales	0.0684	-0.0684	-0.0684	0.0532	0.0228	0.0835	0.0987	0.0917	-0.0228	0.038	-0.038	-0.0532
NA_NA_NA	0.2868***	0.2295**	0.301***	0.0564	0.3535***	0.0216	-0.1747*	-0.02	-0.3005***	0.2392**	0.1101	0.1213
Olpidiomycota_Olpidiomycetes_Olpidiales	0.403***	0.2815***	0.4363***	0.0147	0.4431***	0.2354**	0.0549	0.0528	-0.6195***	0.5971***	0.1007	0.0978
Rozellomycota_NA_NA	0.1608*	0.1425.	0.1056	0.0866	0.126	0.0086	-0.0882	0.062	-0.1146	0.1108	-0.0609	-0.0241
Rozellomycota_Rozellomycotina_cls_Incertae_sedis_GS11	0.0703	0.0781	0.1163	0.0909	0.162*	-0.0527	-0.2222**	-0.0108	-0.0549	0.0471	-0.1137	-0.0599
Rozellomycota_unidentified_unidentified	0.2319**	0.1711*	0.2329**	0.136.	0.2968***	-0.2193**	-0.0741	-0.1645*	-0.38***	0.4642***	-0.0063	-0.0012
unidentified_unidentified_unidentified	0.2511**	0.3147***	0.2536**	0.2446**	0.2419**	-0.2075**	-0.036	-0.1073	-0.2915***	0.324***	0.1124	0.1419.
Zoopagomycota_Zoopagomycetes_Zoopagales	-0.1625*	-0.085	-0.4466***	0.1518.	-0.388***	-0.2696***	0.5849***	-0.0155	0.1812*	0.0614	-0.0151	-0.1133
Archaea	Ca	CEC	Clay	K	Mg	Na	P2O5	pH	Sand	Silt	SOM	TN
Altiarchaeota_Altiarchaeia_NA	-0.1639**	-0.0984	-0.1826**	0.0082	-0.171**	-0.2342***	0.1071.	-0.0307	0.1407*	-0.0287	-0.0957	-0.0733
Altiarchaeota_Altiarchaeia_uncultured archaeon	0.1957**	0.0963	0.1721**	0.106.	0.186**	0.0951	-0.0612	-0.0269	-0.1387*	0.0632	0.1219.	0.1148.
Altiarchaeota_Altiarchaeia_uncultured euryarchaeote	0.0021	0.0843	-0.0873	0.2907***	-0.0843	-0.0712	0.1238*	-0.0236	0.0807	0.0065	0.0233	-0.0407
Asgardaeota_Lokiarchaeia_NA	0.1785**	0.1492*	0.1173.	0.1106.	0.1728**	0.0894	-0.0837	0.0642	-0.1386*	0.1549*	-0.0139	-0.0087
Asgardaeota_Lokiarchaeia_uncultured archaeon VC2.1 Arc31	0.3381***	0.3618***	0.4096***	0.1365*	0.3938***	0.2007**	-0.2706***	-0.1797**	-0.3081***	0.1375*	0.2016**	0.1444*
Asgardaeota_Lokiarchaeia_uncultured crenarchaeote	0.0576	0.039	0.0386	0.0061	0.0205	0.0465	-0.0201	0.0089	-0.0775	0.1384*	-0.0242	-0.0391
Asgardaeota_NA_NA	0.0446	0.1173.	0.1075.	0.1041.	0.0529	0.0063	0.0324	-0.084	-0.0685	0.0202	0.1585*	0.1518*
Asgardaeota_Odinarchaeia_NA	0.0565	0.0384	0.013	0.1563*	0.0383	0.0731	-6e-04	0.0438	-0.0037	0.0032	-0.0698	-0.1007
Asgardaeota_Odinarchaeia_uncultured archaeon APA3-11cm	0.0998	0.0546	0.0592	0.1014	0.0759	-0.0183	-0.041	0.0233	-0.0261	0.0151	0.0495	0.0772
Asgardaeota_Odinarchaeia_uncultured crenarchaeote	-0.0432	-0.0756	-0.0743	-0.0339	-0.0583	0.0055	0.0097	0.0752	0.0789	-0.108.	-0.0449	-0.037
Asgardaeota_Odinarchaeia_uncultured euryarchaeote	0.2537***	0.1761**	0.1643**	0.1487*	0.1643**	0.15*	-0.0442	0.0383	-0.1699**	0.1243*	0.0977	0.0671
Crenarchaeota_Bathyarchaeia_archaeon RBG_16_50_20	0.0866	0.0647	0.0908	0.043	0.0351	-0.0349	-0.1183.	-0.0563	0.0057	-0.0109	0.0818	0.0912
Crenarchaeota_Bathyarchaeia_Candidatus Bathyarchaeota archaeon RBG_16_48_13	0.3877***	0.352***	0.416***	0.1613*	0.4166***	0.1119.	-0.312***	-0.0957	-0.2882***	0.1271*	0.2334***	0.2471***
Crenarchaeota_Bathyarchaeia_NA	0.3735***	0.4424***	0.5323***	0.2236***	0.3047***	-0.022	-0.0343	-0.3383***	-0.4088***	0.112.	0.5376***	0.57***
Crenarchaeota_Bathyarchaeia_uncultured archaeon	0.2058**	0.262***	0.2767***	0.1125.	0.1922**	-0.0196	-0.112.	-0.1761**	-0.1622**	0.0777	0.2858***	0.2626***
Crenarchaeota_Bathyarchaeia_uncultured archaeon Arc.171	0.1531*	0.0896	0.1516*	0.0372	0.1606*	0.0416	-0.1597*	0.0389	-0.102	0.0533	0.0205	0.057
Crenarchaeota_Bathyarchaeia_uncultured archaeon Arc.201	0.0977	0.0664	0.0742	0.056	0.1055.	0.0065	-0.0977	0.0406	-0.0664	0.0742	-0.0273	0.0039
Crenarchaeota_Bathyarchaeia_uncultured archaeon Arc.98	0.0499	0.0611	0.0721	0.0721	0.0318	-0.0034	-0.0165	-0.0574	-0.0337	0.0133	0.1032	0.0811
Crenarchaeota_Bathyarchaeia_uncultured Bathyarchaeota archaeon	0.1516*	0.1168.	0.1406*	0.1607*	0.0378	-0.013	-0.0487	-0.081	-0.0715	0.0425	0.127*	0.119.
Crenarchaeota_Bathyarchaeia_uncultured crenarchaeote MCG	0.0977	0.0664	0.0742	0.056	0.1055.	0.0065	-0.0977	0.0406	-0.0664	0.0742	-0.0273	0.0039
Crenarchaeota_Bathyarchaeia_uncultured euryarchaeote	0.3337***	0.2409***	0.3832***	0.2754***	0.3884***	0.1245*	-0.3493***	-0.0755	-0.1911**	-0.0111	0.0855	0.1257*
Crenarchaeota_Bathyarchaeia_uncultured marine crenarchaeote E6-3G	0.0533	-0.0081	0.0533	0.0167	0.0085	0.0196	-0.0325	-0.0265	-0.0067	0.0035	0.0505	0.0314
Crenarchaeota_Bathyarchaeia_uncultured methanogenic archaeon	0.1222.	0.0621	0.1584*	0.1761**	0.3661***	0.4548***	-0.3024***	0.1012	-0.0054	-0.2613***	-0.0427	-0.0923
Crenarchaeota_Bathyarchaeia_uncultured thaumarchaeote	0.0869	0.062	0.0606	0.0801	0.0597	-0.0614	0.0346	-0.0455	-0.0404	0.0356	0.1139.	0.1523*
Crenarchaeota_Bathyarchaeia_uncultured Thermofilum sp.	0.2634***	0.2732***	0.2904***	0.0337	0.3135***	0.1003	-0.222***	-0.0691	-0.2709***	0.167**	0.1161.	0.1185.
Crenarchaeota_Bathyarchaeia_unidentified archaeon	0.2376***	0.352***	0.1207.	0.2776***	0.0127	-0.2227***	0.3448***	-0.275***	-0.2391***	0.3114***	0.3867***	0.3518***
Diapherotrites_Iainarchaeia_Iainarchaeales	0.0301	0.0182	0.01	0.041	-0.007	0.0174	-0.0059	-0.0106	-0.0349	0.1042.	-0.0176	-0.0551
Diapherotrites_Micrarchaeia_Candidatus Micrarchaeota archaeon CG1_02_55_22	-0.0846	-0.0508	-0.0169	0.0664	-0.0065	-0.0664	-0.082	-0.0916	0.0716	-0.0742	-0.0977	-0.1042.
Diapherotrites_Micrarchaeia_NA	0.1396*	0.1422*	0.1822**	-0.0277	0.1756**	0.0829	-0.1642**	-0.0657	-0.1738**	0.1773**	0.0326	0.0346
Diapherotrites_Micrarchaeia_uncultured archaeon	0.1416*	0.1612*	0.1208.	0.0712	0.142*	0.0559	-0.0652	-0.0488	-0.1688**	0.1859**	0.0029	-0.0223
Diapherotrites_Micrarchaeia_uncultured euryarchaeote	0.016	0.057	0.1141.	-0.0721	0.0959	0.0135	-0.2095***	-0.1486*	-0.0288	0.0321	0.0356	0.0398
Diapherotrites_Micrarchaeia_uncultured euryarchaeote VAL31-1	0.0534	0.0898	0.0898	0.0091	0.0768	0.0586	0.0039	-0.0589	-0.0924	0.0534	0.082	0.0586
Diapherotrites_Micrarchaeia_uncultured euryarchaeote VAL90	0.0193	0.1015	0.0677	0.079	0.0907	0.0196	-0.0681	-0.0937	-0.0652	0.0331	-0.0034	-0.0502
Euryarchaeota_Methanobacteria_Methanobacteriales	-0.1978**	-0.1066.	-0.4508***	0.2754***	-0.5226***	-0.3121***	0.4967***	-7e-04	0.3956***	-0.1608*	0.1099.	0.0865
Euryarchaeota_Methanomicrobia_Methanocellales	-0.5093***	-0.258***	-0.4348***	-0.0674	-0.519***	-0.5948***	0.3363***	-0.0466	0.3348***	-0.0872	-0.1279*	-0.015
Euryarchaeota_Methanomicrobia_Methanomicrobiales	0.2618***	0.0328	0.1269*	0.6427***	0.1924**	0.0715	-0.1343*	0.128*	0.1486*	-0.2768***	0.126*	0.1925**
Euryarchaeota_Methanomicrobia_Methanosarcinales	-0.4357***	-0.2928***	-0.6507***	0.1409*	-0.5103***	-0.4798***	0.3039***	0.1323*	0.5329***	-0.2315***	-0.2384***	-0.1796**
Euryarchaeota_NA_NA	0.0906	0.0886	0.0997	0.026	0.1237*	0.0184	-0.12.	0.0039	-0.0776	0.0776	-0.0112	0.0166
Euryarchaeota_Thermococci_Methanofastidiosales	0.1411*	0.1026	0.126*	0.0363	0.0964	0.061	-0.026	-0.1176.	-0.0751	-0.0327	0.2206***	0.1659**
Euryarchaeota_Thermococci_NA	0.1651**	0.0946	0.0614	0.1346*	0.1192.	0.0976	0.02	0.0643	-0.0966	0.1015	0.0375	0.025
Euryarchaeota_Thermococci_Thermococcales	-0.0716	0.0326	-0.0586	-0.0716	-0.1003	-0.0794	0.0898	-0.0916	-0.0143	0.0664	-0.0039	-0.0195
Euryarchaeota_Thermoplasmata_Marine Benthic Group D and DHVEG-1	-0.0127	-0.0128	0.0078	0.0577	-0.0204	-0.1113.	0.0688	-0.0777	0.0288	9e-04	0.0708	0.0607
Euryarchaeota_Thermoplasmata_Marine Group II	-0.304***	-0.1937**	-0.3248***	-0.2761***	-0.3692***	-0.2637***	0.2281***	0.0869	0.1836**	-0.0407	-0.2084***	-0.226***
Euryarchaeota_Thermoplasmata_Methanomassiliicoccales	-0.237***	-0.165**	-0.3087***	0.1331*	-0.1587*	-0.176**	0.0271	0.1106.	0.275***	-0.1631**	-0.252***	-0.2113***
Euryarchaeota_Thermoplasmata_NA	0.0143	0.0221	0.0508	-0.0586	0.0456	-0.0195	0.0664	-0.0353	-0.0742	0.0977	0.0482	0.0495
Euryarchaeota_Thermoplasmata_uncultured	0.1371*	0.0952	0.0634	0.0841	0.0556	-0.0481	-0.0551	0.0277	-0.0641	0.1528*	-0.0125	0.0203
Hadesarchaeaeota_uncultured archaeon_uncultured archaeon	-0.1072.	-0.1254*	-0.0684	-0.0645	-0.0907	-0.0677	-0.0985	-0.0017	0.1526*	-0.1712**	-0.0835	-0.0827
NA_NA_NA	0.2322***	0.2984***	0.3299***	0.0881	0.2957***	-0.006	-0.1587*	-0.1972**	-0.2571***	0.179**	0.2008**	0.2309***
Nanoarchaeaeota_Nanohaloarchaeia_Aenigmarchaeales	0.0654	0.0327	0.0229	0.0483	0.0183	0.0015	0.0555	-0.034	-0.0481	0.0787	0.0689	0.0506
Nanoarchaeaeota_Nanohaloarchaeia_Deep Sea Euryarchaeotic Group(DSEG)	0.0573	0.0224	0.002	0.0851	-0.0166	-0.0198	-0.0093	-0.074	0.0536	-0.0387	0.0992	0.082
Nanoarchaeaeota_Woesearchaeia_archaeon GW2011_AR13	0.0984	0.0788	0.0471	0.0255	0.0755	0.0617	-0.0459	0.0343	-0.0358	-0.0272	0.0679	0.0265
Nanoarchaeaeota_Woesearchaeia_archaeon GW2011_AR15	0.1267*	0.1272*	0.1125.	0.1781**	0.1494*	0.046	-0.0022	-0.058	-0.109.	0.0806	0.0277	0.0159
Nanoarchaeaeota_Woesearchaeia_Candidatus Amesbacteria bacterium GW2011_GWC1_47_15	0.079	0.0787	0.0235	0.1167.	0.0111	0.0417	0.0657	0.0508	-0.0038	0.0069	0.0686	0.0687
Nanoarchaeaeota_Woesearchaeia_Candidatus Diapherotrites archaeon ADurb.Bin253	0.0732	0.1073.	0.097	0.1354*	0.0432	-0.0326	-0.0242	-0.0551	-0.0253	-0.0061	0.1225.	0.1228.
Nanoarchaeaeota_Woesearchaeia_Candidatus Pacearchaeota archaeon CG1_02_31_27	0.0099	0.0381	0.1012	0.1306*	0.1413*	-0.0692	-0.1876**	-0.113.	-0.0283	0.0275	-0.1156.	-0.0997
Nanoarchaeaeota_Woesearchaeia_Candidatus Pacearchaeota archaeon CG1_02_32_21	-0.0378	-0.0117	-0.0794	0.0352	-0.0924	-0.1003	0.1029	0.0223	0.0404	0.0065	0.0039	-0.0091
Nanoarchaeaeota_Woesearchaeia_Candidatus Pacearchaeota archaeon RBG_19FT_COMBO_34_9	-0.015	0.1103.	0.0874	0.0511	0.0644	-0.0347	-0.0853	-0.1167.	-0.0323	0.0031	-0.0173	-0.0215
Nanoarchaeaeota_Woesearchaeia_Candidatus Staskawiczbacteria bacterium RIFCSPHIGHO2_01_FULL_34_27	-0.0326	-0.0271	0.0026	0.192**	0.1021	-0.0238	-0.213***	-0.0702	0.0619	-0.03	-0.2296***	-0.2428***
Nanoarchaeaeota_Woesearchaeia_Candidatus Staskawiczbacteria bacterium RIFOXYA2_FULL_32_7	0.1441*	0.1757**	0.0873	0.111.	0.0677	0.0073	0.0456	-0.0189	-0.1061.	0.1101.	0.1051.	0.0695
Nanoarchaeaeota_Woesearchaeia_metagenome	0.0923	0.055	-6e-04	0.094	0.0245	0.1059.	0.0854	0.0921	-0.0412	0.0635	0.0044	-0.009
Nanoarchaeaeota_Woesearchaeia_NA	0.1967**	0.2863***	0.2058**	0.1168.	0.1077.	0.1116.	-0.0633	-0.1984**	-0.1788**	0.1695**	0.1939**	0.0764
Nanoarchaeaeota_Woesearchaeia_Nanoarchaeota archaeon SCGC AAA011-D5	-0.1769**	-0.0387	-0.0059	0.0921	-0.0077	-0.1512*	-0.142*	-0.2659***	0.099	-0.1023	-0.164**	-0.1912**
Nanoarchaeaeota_Woesearchaeia_uncultured archaeon	0.0685	0.0809	0.0859	0.0948	-0.0771	0.0125	-0.0624	-0.1178.	-0.0078	0.0264	0.0597	0.0052
Nanoarchaeaeota_Woesearchaeia_uncultured archaeon CLEAR-15	-0.0515	0.0901	-0.0152	-0.0774	-0.0709	-0.0575	0.106.	-0.1402*	-0.0706	0.1079.	0.0434	0.0117
Nanoarchaeaeota_Woesearchaeia_uncultured bacterium	0.0534	-0.0259	0.0286	-9e-04	-0.0148	0.1231.	-0.0211	0.1187.	-0.0252	0.015	-0.036	-0.0596
Nanoarchaeaeota_Woesearchaeia_uncultured crenarchaeote	0.0084	-0.0681	-0.0651	0.0217	-0.0248	0.0556	0.0568	0.0383	0.0533	-0.0622	0.0048	-0.0089
Nanoarchaeaeota_Woesearchaeia_uncultured euryarchaeote	0.0599	0.06	0.057	-0.0364	0.0764	0.1857**	-0.0999	-0.1705**	0.0201	-0.0614	0.1652**	0.0269
Thaumarchaeota_Group 1.1c_NA	0.0211	0.0442	-0.0351	-4e-04	-0.0394	-0.0183	0.1031	-0.0325	-0.0453	0.058	0.0452	0.0035
Thaumarchaeota_Group 1.1c_uncultured archaeon	0.0832	0.1108.	0.12.	-0.0221	0.1145.	0.061	-0.0959	-0.0669	-0.0887	0.022	0.0833	0.061
Thaumarchaeota_Group 1.1c_uncultured crenarchaeote	-0.219***	0.0011	-0.249***	-0.271***	-0.2643***	-0.1851**	0.2804***	-0.0433	-0.006	0.1537*	-0.1207.	-0.1287*
Thaumarchaeota_Group 1.1c_uncultured thaumarchaeote	0.0664	-0.0299	-0.0326	0.0482	0.0247	0.0794	0.0742	0.0641	-0.0352	0.0456	-0.0143	-0.03
Thaumarchaeota_Marine Benthic Group A_NA	0.0252	-0.0271	0.0262	0.0368	0.0162	0.0611	-0.0857	0.0061	0.0541	-0.1021	0.0161	1e-04
Thaumarchaeota_NA_NA	0.0644	0.0275	0.0586	-0.2178***	0.0629	-0.0439	-0.0539	-0.0336	-0.1003	0.0968	0.0515	0.0484
Thaumarchaeota_Nitrososphaeria_Nitrosopumilales	-0.0337	-0.173**	-0.2085***	-0.0962	-0.0459	0.2064***	-0.0181	0.3909***	0.1358*	-0.047	-0.369***	-0.3991***
Thaumarchaeota_Nitrososphaeria_Nitrososphaerales	0.3584***	0.404***	0.4646***	0.0166	0.2532***	0.0913	0.163**	-0.1748**	-0.6052***	0.468***	0.2819***	0.1919**
Thaumarchaeota_Nitrososphaeria_Nitrosotaleales	-0.3549***	-0.1103.	-0.1775**	-0.47***	-0.0991	-0.154*	-0.0168	-0.2201***	-0.0379	0.2191***	-0.2691***	-0.3127***
Thaumarchaeota_SCGC AB-179-E04_hot springs metagenome	0.0732	0.0163	0.021	0.1148.	-0.02	-0.084	0.0336	-0.0491	0.0512	-0.0785	0.1728**	0.1964**
Thaumarchaeota_SCGC AB-179-E04_uncultured archaeon	0.115.	0.22***	0.2**	0.0171	0.2259***	0.0925	-0.0777	-0.0996	-0.2041**	0.1324*	0.1093.	0.0801

## Sheet: Family
Bacteria	Ca	CEC	Clay	K	Mg	Na	P2O5	pH	Sand	Silt	SOM	TN
Acidobacteria_Acidobacteriia_Acidobacteriales_Acidobacteriaceae (Subgroup 1)	-0.1384*	-0.0643	-0.0787	-0.0718	-0.136*	-0.2233***	0.1107.	-0.2327***	0.0024	0.1473*	0.0592	0.0635
Acidobacteria_Acidobacteriia_Acidobacteriales_Koribacteraceae	-0.2726***	0.0312	-0.0581	-0.2833***	-0.2561***	-0.3905***	0.251***	-0.4319***	-0.0455	0.1651**	0.1615*	0.1794**
Acidobacteria_Acidobacteriia_Acidobacteriales_NA	-0.0089	-0.0769	-0.0472	-0.1198.	0.1611*	0.21***	-0.1455*	0.1058.	0.0485	-0.0885	-0.1017	-0.1476*
Acidobacteria_Acidobacteriia_Acidobacteriales_uncultured	-0.4103***	-0.1121.	-0.2678***	-0.5187***	-0.1933**	-0.2401***	0.136*	-0.1488*	-0.0203	0.2031**	-0.1842**	-0.2251***
Acidobacteria_Acidobacteriia_Acidobacteriales_uncultured Acidobacteriaceae bacterium	-0.1342*	0.0233	-0.1023	-0.15*	-0.1887**	-0.2786***	0.2663***	-0.0905	-0.0586	0.2302***	0.0542	0.0573
Acidobacteria_Acidobacteriia_NA_NA	-0.0013	-0.0612	0.0273	-0.0273	-0.0456	0.0352	-0.0456	0.089	-0.0013	-0.0169	-0.0651	-0.0742
Acidobacteria_Acidobacteriia_Solibacterales_Solibacteraceae (Subgroup 3)	-0.3914***	-0.1662**	-0.274***	-0.2586***	-0.3687***	-0.5327***	0.3388***	-0.1114.	0.0272	0.1777**	-0.1212.	-0.0111
Acidobacteria_Acidobacteriia_Subgroup 12_uncultured bacterium	-0.349***	-0.3284***	-0.378***	-0.2922***	-0.4422***	-0.2286***	0.2588***	0.0617	0.2091***	0.0326	-0.2881***	-0.3236***
Acidobacteria_Acidobacteriia_Subgroup 13_NA	-0.2076***	-0.1476*	-0.1736**	-0.186**	-0.1474*	-0.1074.	0.0468	0.0942	0.0822	0.0016	-0.2158***	-0.1794**
Acidobacteria_Acidobacteriia_Subgroup 13_uncultured Acidobacteria bacterium	0.1599*	0.1507*	0.1295*	0.101	0.1261*	0.0819	0.0459	0.0466	-0.1833**	0.1724**	0.0683	0.0697
Acidobacteria_Acidobacteriia_Subgroup 13_uncultured Acidobacterium sp.	0.0985	0.0495	0.0144	0.1212.	0.0018	0.0136	0.0186	0.0205	0.0239	-0.0091	0.0784	0.0604
Acidobacteria_Acidobacteriia_Subgroup 13_uncultured bacterium	0.0077	-0.0273	-0.0046	0.0197	0.0708	0.0823	-0.1591*	0.0034	0.0411	-0.033	-0.1148.	-0.1541*
Acidobacteria_Acidobacteriia_Subgroup 13_uncultured bacterium KF-JG30-18	0.0347	0.085	0.085	0.0187	0.1089.	0.0203	-0.0473	-0.1137.	-0.0855	0.0122	0.0372	-0.0096
Acidobacteria_Acidobacteriia_Subgroup 13_uncultured Holophaga sp.	4e-04	8e-04	0.0363	0.0204	0.0613	0.0113	-0.1143.	0.0035	-9e-04	-0.005	-0.0574	-0.0562
Acidobacteria_Acidobacteriia_Subgroup 13_uncultured Solibacterales bacterium	0.0173	7e-04	0.0315	0.0944	0.0791	0.0203	-0.0977	-0.0425	0.0346	-0.0795	-0.0082	-0.0059
Acidobacteria_Acidobacteriia_Subgroup 2_metagenome	0.0664	-0.0299	-0.0326	0.0482	0.0247	0.0794	0.0742	0.0641	-0.0352	0.0456	-0.0143	-0.03
Acidobacteria_Acidobacteriia_Subgroup 2_NA	-0.3151***	-0.4208***	-0.3272***	-0.2109***	-0.2049**	-0.0619	-0.1865**	0.3566***	0.3659***	-0.2708***	-0.5195***	-0.471***
Acidobacteria_Acidobacteriia_Subgroup 2_uncultured Acidobacteria bacterium	-0.1858**	0.0181	-0.2288***	-0.1271*	-0.2584***	-0.2426***	0.284***	-0.0273	0.0436	0.1307*	-0.0486	-0.0608
Acidobacteria_Acidobacteriia_Subgroup 2_uncultured Acidobacterium sp.	0.0994	0.0661	0.1201.	0.0135	0.107.	-0.0156	-0.1444*	-0.0055	-0.111.	0.1381*	-0.0206	0.0203
Acidobacteria_Acidobacteriia_Subgroup 2_uncultured bacterium	0.0221	0.0013	0.0195	0.0247	-0.0534	-0.0482	-0.0326	-0.0589	0.0612	-0.0664	0.0898	0.0795
Acidobacteria_Acidobacteriia_Subgroup 2_uncultured bacterium KF/GS-JG36-31	0.1055.	0.0742	-0.0039	0.0977	0.056	0.1055.	0.0247	0.1034	-0.0508	0.1055.	-0.0534	-0.0821
Acidobacteria_Acidobacteriia_Subgroup 2_uncultured eubacterium WD244	0.0488	-0.0483	-0.094	0.0293	-0.0059	0.0657	0.1533*	0.1011	-0.0482	0.0996	-0.0381	-0.0576
Acidobacteria_Acidobacteriia_Subgroup 2_uncultured eubacterium WD261	0.0379	-0.0281	0.0887	0.1051.	0.0972	-0.037	-0.2318***	0.0541	-0.0024	-0.0047	-0.2041**	-0.1729**
Acidobacteria_Acidobacteriia_Subgroup 2_uncultured eubacterium WD264	-0.0846	-0.0508	-0.0169	0.0664	-0.0065	-0.0664	-0.082	-0.0916	0.0716	-0.0742	-0.0977	-0.1042.
Acidobacteria_Acidobacteriia_Subgroup 2_uncultured Holophaga sp.	-0.0896	0.252***	0.0832	-0.2301***	0.0582	-0.0495	0.0912	-0.4063***	-0.2777***	0.3074***	0.1713**	0.0671
Acidobacteria_Aminicenantia_Aminicenantales_metagenome	0.1902**	0.2772***	0.2812***	-0.0467	0.2966***	0.1097.	-0.1813**	-0.1728**	-0.2296***	0.0441	0.2313***	0.228***
Acidobacteria_Aminicenantia_Aminicenantales_NA	0.0116	0.1506*	0.0993	0.0766	0.0032	-0.1612*	0.0943	-0.1874**	-0.0718	0.0957	0.1895**	0.2093***
Acidobacteria_Aminicenantia_Aminicenantales_uncultured Aminicenantes bacterium	0.0235	0.1032	0.1973**	-0.0017	0.2307***	-0.0235	-0.3099***	-0.1612*	-0.0541	-0.0901	-0.0478	-0.0457
Acidobacteria_Aminicenantia_Aminicenantales_uncultured Anaerolineae bacterium	0.0977	0.0664	0.0742	0.056	0.1055.	0.0065	-0.0977	0.0406	-0.0664	0.0742	-0.0273	0.0039
Acidobacteria_Aminicenantia_Aminicenantales_uncultured bacterium	-0.0989	0.037	-0.126*	-0.0747	-0.1457*	-0.1593*	0.1517*	0.0038	0.046	0.0506	-0.0385	-0.0461
Acidobacteria_Aminicenantia_Aminicenantales_uncultured Desulfovibrio sp.	0.2037**	0.0582	0.0211	0.3615***	0.0068	-0.0271	0.1454*	0.0203	0.0476	-0.0647	0.2379***	0.26***
Acidobacteria_Aminicenantia_Aminicenantales_uncultured microorganism	0.2666***	0.3437***	0.3577***	0.1902**	0.3313***	0.2074***	-0.076	-0.0822	-0.3218***	0.1768**	0.185**	0.1426*
Acidobacteria_Aminicenantia_Aminicenantales_uncultured prokaryote	0.1459*	0.1177.	0.1857**	0.165**	0.1577*	0.1017	-0.1084.	-0.0218	-0.0856	-0.0642	0.0759	0.0851
Acidobacteria_Aminicenantia_Aminicenantales_uncultured soil bacterium	0.2968***	0.2168***	0.1155.	0.401***	0.0805	0.1729**	0.1681**	0.1866**	-0.1211.	0.113.	0.1351*	0.1469*
Acidobacteria_AT-s3-28_NA_NA	0.0698	0.0817	0.0591	-0.0256	0.0864	0.0548	-0.0556	0.016	-0.0852	0.1573*	-0.0373	-0.0371
Acidobacteria_AT-s3-28_uncultured Acidobacteria bacterium_uncultured Acidobacteria bacterium	-0.0851	-0.0833	-0.0216	-0.1329*	-0.0684	0.0058	-0.0497	-0.0582	0.0281	-0.0079	-0.039	-0.0446
Acidobacteria_AT-s3-28_uncultured bacterium_uncultured bacterium	-0.0238	-0.0689	-0.0618	-0.1166.	-0.1061.	0.0037	0.0189	0.0433	-0.023	0.112.	-0.0996	-0.1239*
Acidobacteria_AT-s3-28_unidentified_unidentified	0.0222	-0.0321	-0.0545	-0.0083	0.0508	0.1022	-0.0377	0.0746	0.0248	0.0044	-0.0831	-0.0949
Acidobacteria_Blastocatellia (Subgroup 4)_11-24_Acidobacteria bacterium Ellin7246	-0.0404	-0.0176	-0.0948	0.0031	-0.0623	-0.0335	0.1075.	-0.0283	0.0023	0.0568	-0.0739	-0.098
Acidobacteria_Blastocatellia (Subgroup 4)_11-24_NA	-0.2507***	-0.1339*	-0.1863**	-0.096	-0.1922**	-0.1581*	0.0165	-0.0117	0.1585*	-0.0619	-0.1879**	-0.1953**
Acidobacteria_Blastocatellia (Subgroup 4)_11-24_uncultured Acidobacteria bacterium	-0.0921	-0.1777**	-0.0704	-0.0553	-0.0935	-0.0692	0.0271	0.1116.	0.0583	-0.0118	-0.1714**	-0.147*
Acidobacteria_Blastocatellia (Subgroup 4)_11-24_uncultured Acidobacteriales bacterium	-0.031	-0.3294***	-0.1725**	-0.1276*	-0.1195.	0.0709	0.0085	0.4414***	0.0934	0.0355	-0.3632***	-0.3142***
Acidobacteria_Blastocatellia (Subgroup 4)_11-24_uncultured Acidobacterium sp.	-0.0488	-0.0606	-0.0852	-0.0986	-0.0311	0.0889	-0.0506	0.0728	0.0781	-0.094	-0.0922	-0.1332*
Acidobacteria_Blastocatellia (Subgroup 4)_Blastocatellales_Blastocatellaceae	0.2814***	-0.072	0.1273*	0.3196***	-0.0935	0.0522	0.1587*	0.2**	0.0193	-0.0724	0.1707**	0.2427***
Acidobacteria_Blastocatellia (Subgroup 4)_Chloracidobacteriales_Chloracidobacteriaceae	-0.0951	-0.0977	-0.0885	-0.0977	-0.069	0.0482	-0.0169	0.0092	0.0977	-0.1003	-0.0742	-0.0899
Acidobacteria_Blastocatellia (Subgroup 4)_DS-100_NA	-0.0169	-0.0391	0.0341	-0.0069	-0.0471	-0.0473	0.0226	-0.0768	0.0461	-0.0456	0.1057.	0.1308*
Acidobacteria_Blastocatellia (Subgroup 4)_DS-100_uncultured Acidobacteria bacterium	0	-0.0421	-0.0464	-0.1147.	-0.0347	-0.018	0.0663	0.0998	-0.0669	0.1533*	-0.1204.	-0.126*
Acidobacteria_Blastocatellia (Subgroup 4)_DS-100_uncultured bacterium	0.0237	-0.1084.	0.0235	0.0107	0.0284	0.1727**	-0.218***	0.2854***	0.0447	-0.0716	-0.3407***	-0.3374***
Acidobacteria_Blastocatellia (Subgroup 4)_Elev-16S-573_uncultured proteobacterium	-0.1534*	-0.2055**	-0.1348*	-0.1764**	0.0398	0.2057**	-0.1896**	0.1473*	0.1757**	-0.1835**	-0.2187***	-0.2224***
Acidobacteria_Blastocatellia (Subgroup 4)_NA_NA	-0.1002	-0.0321	-0.0821	-0.008	-0.1299*	-0.1641**	0.0794	-0.1304*	0.0434	0.0313	-0.0062	-0.013
Acidobacteria_Blastocatellia (Subgroup 4)_Pyrinomonadales_Pyrinomonadaceae	0.0449	-0.1225.	-0.0882	0.1284*	-0.2145***	-0.2396***	0.2359***	0.1174.	0.0031	0.1643**	0.0145	0.0973
Acidobacteria_c5LKS83_uncultured bacterium_uncultured bacterium	0.1629**	0.1696**	0.1945**	0.1324*	0.112.	0.0197	-0.0717	-0.1685**	-0.093	0.0159	0.2426***	0.2441***
Acidobacteria_Fischerbacteria_Candidatus Fischerbacteria bacterium RBG_13_37_8_Candidatus Fischerbacteria bacterium RBG_13_37_8	-0.0612	-0.0404	-0.0964	0.043	-0.1055.	-0.1081.	0.0951	0.0641	0.0456	0.0195	-0.0378	-0.0143
Acidobacteria_Holophagae_Holophagales_Holophagaceae	-0.0384	0.2679***	0.2237***	-0.0527	0.1016	-0.1222.	-0.1032	-0.4849***	-0.1672**	0.1391*	0.1934**	0.1381*
Acidobacteria_Holophagae_Subgroup 7_Acidobacteria bacterium enrichment culture clone CV-04	0.0768	0.043	0.043	0.1055.	0.0169	0.0872	0.056	0.0641	-0.0273	-0.0247	0.0299	0.0117
Acidobacteria_Holophagae_Subgroup 7_NA	0.0304	-0.041	-0.0458	-0.1551*	-0.1408*	-0.1222.	0.1786**	0.0988	-0.066	0.1647**	-0.0352	0.0083
Acidobacteria_Holophagae_Subgroup 7_uncultured Acidobacteriales bacterium	-0.0131	-0.0343	8e-04	-0.2436***	0.2843***	0.2457***	-0.4632***	-0.0786	0.1141.	-0.2513***	-0.1014	-0.0979
Acidobacteria_Holophagae_Subgroup 7_uncultured Acidobacterium sp.	0.0541	0.0289	-0.0278	0.0913	0.0188	-0.0489	-0.045	0.1138.	0.0111	0.0645	-0.0812	-0.0624
Acidobacteria_Holophagae_Subgroup 7_uncultured bacterium gp7	0.1987**	0.1247*	0.0551	0.2308***	0.073	0.2129***	0.0984	0.1796**	-0.0825	0.0602	-0.0067	-0.0571
Acidobacteria_Holophagae_Subgroup 7_uncultured bacterium SJA-36	0.0475	0.0456	0.0096	0.1011	0.0511	0.0908	-0.0375	0.0332	-0.0406	0.068	-0.115.	-0.1426*
Acidobacteria_Holophagae_Subgroup 7_uncultured candidate division OS-K bacterium	-0.065	0.0252	-0.1178.	-0.0211	-0.1229.	-0.1956**	0.1718**	-0.1215.	0.0384	0.0453	0.1235.	0.1535*
Acidobacteria_Holophagae_Subgroup 7_uncultured Desulfovirga sp.	-0.086	-0.0162	-0.0438	-0.1223.	0.0089	-0.0774	-0.0075	-0.0035	-0.0034	-0.022	-0.0629	-0.0528
Acidobacteria_Holophagae_Subgroup 7_uncultured Desulfuromonadales bacterium	-0.3661***	-0.2906***	-0.3643***	-0.2239***	-0.2753***	-0.1953**	0.084	0.1709**	0.2498***	-0.1577*	-0.3065***	-0.2727***
Acidobacteria_Holophagae_Subgroup 7_uncultured Holophaga sp.	0.0445	0.0676	0.1251*	0.0432	0.1053.	0.0471	-0.1104.	-0.0642	-0.0427	-0.0174	0.0639	0.0716
Acidobacteria_Holophagae_Subgroup 7_uncultured proteobacterium	-0.2681***	-0.1859**	-0.2859***	-0.2721***	-0.2568***	-0.22***	0.161*	-0.0538	0.1211.	0.0701	-0.0801	-0.101
Acidobacteria_Holophagae_Subgroup 7_uncultured soil bacterium	0.0475	-0.0394	-0.0221	0.0223	0.066	0.1673**	-0.0394	0.0924	7e-04	0.0153	-0.0496	-0.07
Acidobacteria_Holophagae_Subgroup 7_uncultured Thermaerobacter sp.	-0.2203***	-0.1221.	-0.1182.	-0.1105.	0.0799	0.0164	-0.1212.	0.0533	0.0711	-0.0876	-0.2006**	-0.1645**
Acidobacteria_NA_NA_NA	-0.005	0.0291	-0.039	0.0174	-0.093	-0.0341	0.0797	-0.0463	0.0058	0.0059	0.0152	-0.0167
Acidobacteria_Subgroup 11_NA_NA	0.0134	-0.0657	-0.1718**	-0.0563	-0.0973	0.0454	0.0677	0.2544***	0.0475	0.0907	-0.246***	-0.2862***
Acidobacteria_Subgroup 11_uncultured Acidobacteria bacterium_uncultured Acidobacteria bacterium	-0.0417	-0.1517*	-0.1952**	-5e-04	0.0031	-0.0042	-0.0445	0.1296*	0.2292***	-0.1636**	-0.0878	-0.0443
Acidobacteria_Subgroup 11_uncultured Acidobacterium sp._uncultured Acidobacterium sp.	-0.1582*	-0.1419*	-0.2046**	-0.059	-0.0125	0.0409	-0.0848	0.054	0.1942**	-0.1143.	-0.1244*	-0.1446*
Acidobacteria_Subgroup 11_uncultured bacterium_uncultured bacterium	0.1162.	0.0256	0.0292	0.0738	0.092	0.0611	-0.0161	0.0743	-0.0719	0.0848	-0.0295	-0.0186
Acidobacteria_Subgroup 11_uncultured soil bacterium_uncultured soil bacterium	-0.0013	-0.0612	0.0273	-0.0273	-0.0456	0.0352	-0.0456	0.089	-0.0013	-0.0169	-0.0651	-0.0742
Acidobacteria_Subgroup 15_NA_NA	-0.0127	0.065	-0.0659	-0.0301	-0.0308	0.0438	0.0551	0.0278	-0.0232	0.1108.	-0.0808	-0.1067.
Acidobacteria_Subgroup 15_uncultured Acidobacteria bacterium_uncultured Acidobacteria bacterium	-0.1025	6e-04	-0.1642**	0.0448	-0.2228***	-0.1886**	0.2419***	0.0208	0.045	0.0617	-0.0183	-0.0287
Acidobacteria_Subgroup 15_uncultured bacterium_uncultured bacterium	0.1657**	0.1409*	0.1626**	-0.0324	0.1431*	0.0905	-0.0246	-0.0221	-0.1924**	0.0978	0.0693	0.0637
Acidobacteria_Subgroup 15_uncultured Holophaga sp._uncultured Holophaga sp.	-0.0964	-0.0513	-0.1686**	-0.0849	-0.1329*	-0.0841	0.1525*	0.0791	0.0619	0.0229	-0.0835	-0.0912
Acidobacteria_Subgroup 15_uncultured proteobacterium_uncultured proteobacterium	0.1779**	0.0789	0.0524	0.1436*	0.0521	0.0854	0.0559	0.0344	-0.0738	0.1273*	0.0866	0.0413
Acidobacteria_Subgroup 17_metagenome_metagenome	-0.011	-0.0344	-0.1199.	0.0617	-0.0801	0.073	0.1035	0.1522*	0.016	0.0739	-0.1186.	-0.1524*
Acidobacteria_Subgroup 17_NA_NA	-0.0292	-0.0436	-0.2001**	0.0025	-0.11.	0.0369	0.2079***	0.2014**	0.0304	0.1059.	-0.1418*	-0.1865**
Acidobacteria_Subgroup 17_uncultured Acidobacteriaceae bacterium_uncultured Acidobacteriaceae bacterium	0.0977	0.0664	0.0742	0.056	0.1055.	0.0065	-0.0977	0.0406	-0.0664	0.0742	-0.0273	0.0039
Acidobacteria_Subgroup 17_uncultured Acidobacteriales bacterium_uncultured Acidobacteriales bacterium	0.0168	-0.0626	-0.041	0.1055.	-0.0549	0.0171	0.0782	0.1669**	0.0364	-0.0386	-0.0779	-0.0751
Acidobacteria_Subgroup 17_uncultured bacterium gp17_uncultured bacterium gp17	0.0271	-0.0698	-0.0148	0.0077	-0.0131	0.0624	-0.009	0.1962**	0.0095	-4e-04	-0.1568*	-0.1598*
Acidobacteria_Subgroup 17_uncultured Geobacter sp._uncultured Geobacter sp.	0.0586	0.1551*	0.0865	0.0168	0.0148	0.0193	0.0893	-0.0731	-0.0993	0.0331	0.1314*	0.0918
Acidobacteria_Subgroup 17_uncultured prokaryote_uncultured prokaryote	-0.0914	-0.1996**	-0.1347*	-0.1034	0.0651	0.0306	-0.2799***	0.1414*	0.2265***	-0.2134***	-0.2064***	-0.1569*
Acidobacteria_Subgroup 17_uncultured proteobacterium_uncultured proteobacterium	0.0351	0.1246*	0.0868	0.1531*	0.0646	-0.0381	0.003	-0.0999	-0.0569	0.0315	0.0596	0.0303
Acidobacteria_Subgroup 18_NA_NA	0.0346	-0.1576*	-0.144*	0.1832**	-0.0772	-0.0018	0.0064	0.0148	0.2364***	-0.2214***	0.0617	0.0539
Acidobacteria_Subgroup 18_uncultured Acidobacteria bacterium_uncultured Acidobacteria bacterium	-0.0642	0.0277	-0.0144	-0.0977	-0.0291	-0.081	0.107.	-0.0408	-0.05	0.1108.	0.0186	0.0324
Acidobacteria_Subgroup 18_uncultured Acidobacterium sp._uncultured Acidobacterium sp.	-0.0092	-0.0077	0.0443	-0.0075	-0.0591	0.0241	0.0016	0.0578	0.0092	-0.0405	0.0061	0.0143
Acidobacteria_Subgroup 18_uncultured bacterium_uncultured bacterium	-0.0732	-0.0506	-0.121.	-0.0359	-0.0692	-0.0213	0.0074	0.0821	0.0296	0.0921	-0.2011**	-0.21***
Acidobacteria_Subgroup 18_uncultured prokaryote_uncultured prokaryote	0.1818**	0.2158***	0.2905***	-0.0248	0.3375***	0.1397*	-0.1964**	-0.0292	-0.2618***	0.0709	0.0814	0.0816
Acidobacteria_Subgroup 18_uncultured soil bacterium_uncultured soil bacterium	0.064	0.0716	0.1277*	0.058	0.0685	0.006	-0.1056.	-0.0901	-0.059	0.033	0.0415	0.0366
Acidobacteria_Subgroup 19_uncultured bacterium_uncultured bacterium	-0.0242	-0.0421	-0.0294	0.0354	0.0239	-0.0101	-0.0321	0.0143	0.0644	-0.0217	-0.047	-0.033
Acidobacteria_Subgroup 20_uncultured bacterium_uncultured bacterium	0.0416	-0.0339	-0.0835	0.0191	-0.0195	0.1072.	0.0512	0.1816**	-0.0216	0.0904	-0.152*	-0.1766**
Acidobacteria_Subgroup 21_NA_NA	0.1337*	0.0791	0.0791	0.1438*	0.0394	0.012	0.0399	0.0527	-0.0458	0.0023	0.0958	0.0942
Acidobacteria_Subgroup 21_uncultured soil bacterium_uncultured soil bacterium	0.1265*	0.0122	0.1473*	0.2634***	0.0248	0.1565*	0.0166	0.1693**	-0.0792	0.0197	-0.0758	-0.0656
Acidobacteria_Subgroup 22_metagenome_metagenome	-0.0128	-0.1565*	-0.0526	0.0117	-0.0392	-0.0841	0.0169	0.162*	0.0997	-0.115.	-0.0737	-0.008
Acidobacteria_Subgroup 22_NA_NA	0.1882**	0.0865	0.1073.	0.1574*	0.0672	0.0631	-0.0554	-0.0614	-0.0503	0.0335	0.1046.	0.0827
Acidobacteria_Subgroup 22_uncultured Acidobacteria bacterium_uncultured Acidobacteria bacterium	0.1238*	0.0792	0.16*	-0.0183	0.1384*	0.0766	-0.1342*	0.1068.	-0.1403*	0.1279*	-0.1029	-0.089
Acidobacteria_Subgroup 22_uncultured Acidobacteriales bacterium_uncultured Acidobacteriales bacterium	0.1008	0.1484*	0.1117.	0.0191	0.0839	0.0323	0.0292	-0.145*	-0.1678**	0.1701**	0.0891	0.0409
Acidobacteria_Subgroup 22_uncultured Acidobacterium sp._uncultured Acidobacterium sp.	0.1216.	0.1168.	0.2145***	0.058	0.2352***	0.1456*	-0.1472*	0.0398	-0.2078***	0.1636**	-0.0816	-0.0841
Acidobacteria_Subgroup 22_uncultured bacterium_uncultured bacterium	-0.0128	-0.1076.	-0.1134.	-0.0102	-0.1879**	2e-04	0.1302*	0.1808**	0.0406	0.0403	-0.1391*	-0.1725**
Acidobacteria_Subgroup 22_uncultured Holophaga sp._uncultured Holophaga sp.	0.0746	0.0507	-0.1507*	0.1423*	-0.0496	-0.0113	0.2135***	0.1197.	-0.0288	0.1738**	-0.0701	-0.1121.
Acidobacteria_Subgroup 22_uncultured organism_uncultured organism	-0.0394	0.0278	0.0454	-0.0077	0.079	0.0051	-0.1747**	-0.0951	0.0432	-0.0987	0.0021	0.0106
Acidobacteria_Subgroup 22_uncultured prokaryote_uncultured prokaryote	0.1552*	0.1671**	0.1489*	0.0715	0.1782**	0.1622**	-0.1379*	0.0197	-0.1237*	0.0817	0.0359	0.0152
Acidobacteria_Subgroup 22_uncultured proteobacterium_uncultured proteobacterium	0.1426*	0.121.	0.1457*	-0.0288	0.123.	-0.0617	-0.0366	-0.1164.	-0.1601*	0.1141.	0.1368*	0.1253*
Acidobacteria_Subgroup 25_NA_NA	0.0811	-0.1006	-0.0326	-0.0182	-0.0482	0.0317	0.1184.	0.1884**	-0.0448	0.1673**	-0.0893	-0.107.
Acidobacteria_Subgroup 25_uncultured Acidobacteria bacterium_uncultured Acidobacteria bacterium	0.1824**	0.147*	0.1618*	8e-04	0.0629	-0.0024	0.0014	-0.1272*	-0.1447*	0.105.	0.2058**	0.2004**
Acidobacteria_Subgroup 25_uncultured bacterium_uncultured bacterium	0.2187***	0.144*	0.2244***	0.0338	0.281***	0.1893**	-0.2435***	0.0307	-0.1729**	0.0802	0.0239	0.0435
Acidobacteria_Subgroup 25_uncultured soil bacterium_uncultured soil bacterium	-0.2457***	-0.1536*	-0.2481***	-0.1281*	-0.3301***	-0.1919**	0.144*	-0.0926	0.1769**	-0.0666	-0.1094.	-0.1493*
Acidobacteria_Subgroup 5_metagenome_metagenome	0.1022	-0.0683	-0.1159.	0.1415*	-0.0586	-0.0154	0.1831**	0.215***	0.0196	0.0575	-0.0492	-0.0556
Acidobacteria_Subgroup 5_NA_NA	-0.0868	-0.0554	-0.0993	-0.0591	-0.1732**	-0.1352*	0.1375*	-0.0137	0.0329	0.0621	-0.0469	-0.0593
Acidobacteria_Subgroup 5_uncultured Acidobacteriales bacterium_uncultured Acidobacteriales bacterium	-0.098	-0.0129	-0.119.	-0.0354	-0.1254*	-0.1458*	0.1309*	0.0222	0.035	0.0481	-0.0204	-0.024
Acidobacteria_Subgroup 5_uncultured Acidobacterium sp._uncultured Acidobacterium sp.	-0.0081	-0.0244	-0.0361	0.0866	-0.0437	-0.0117	-4e-04	0.0627	0.0294	0.0112	-0.107.	-0.136*
Acidobacteria_Subgroup 5_uncultured Holophaga sp._uncultured Holophaga sp.	0.0245	0.1041.	0.099	2e-04	0.0696	-0.0466	0.0651	-0.0891	-0.1201.	0.0958	0.1202.	0.1203.
Acidobacteria_Subgroup 6_Acidobacteria bacterium SCN 69-37_Acidobacteria bacterium SCN 69-37	0.0155	-0.0178	-0.037	0.0973	-0.0031	0.0106	0.0621	0.012	0.0073	0.0278	-0.029	-0.0472
Acidobacteria_Subgroup 6_Acidobacteria bacterium WX27_Acidobacteria bacterium WX27	-0.066	-0.0661	0.0026	-0.1952**	-0.0112	-0.0594	0.0511	-0.0476	-0.0307	0.0758	-0.0114	0.0034
Acidobacteria_Subgroup 6_NA_NA	0.0171	-0.0569	-0.0654	-0.0546	-0.0746	-0.0726	0.0484	0.174**	-0.0299	0.0878	-0.1524*	-0.1057.
Acidobacteria_Subgroup 6_uncultivated soil bacterium clone C112_uncultivated soil bacterium clone C112	-0.0481	-0.0694	-0.1045.	-0.0557	-0.047	0.1172.	-0.0051	0.071	0.0831	-0.0542	-0.1169.	-0.1517*
Acidobacteria_Subgroup 6_uncultured Acidobacterium sp._uncultured Acidobacterium sp.	0.0791	0.0626	0.0885	-0.0022	0.1068.	-0.0093	-0.0217	0.0035	-0.0997	0.1218.	0.015	0.038
Acidobacteria_Subgroup 6_uncultured Anaeromyxobacter sp._uncultured Anaeromyxobacter sp.	0.0772	0.0796	0.1651**	-0.0726	0.079	-0.0209	-0.1168.	-0.1266*	-0.1236*	0.1216.	0.1018	0.1044.
Acidobacteria_Subgroup 6_uncultured bacterium 126_uncultured bacterium 126	0.0933	-0.0661	-0.0534	0.154*	-0.0675	-9e-04	0.063	0.1527*	0.0516	-0.0138	-0.0099	0.0661
Acidobacteria_Subgroup 6_uncultured bacterium 213_uncultured bacterium 213	-0.1113.	-0.1943**	-0.135*	0.1514*	-0.0769	0.0613	-0.0497	0.1386*	0.2455***	-0.3099***	-0.0933	-0.0871
Acidobacteria_Subgroup 6_uncultured bacterium 259_uncultured bacterium 259	-0.0681	-0.0329	-0.1473*	-0.0055	-0.1363*	-0.0999	0.0651	0.042	0.1091.	1e-04	-0.0733	-0.0896
Acidobacteria_Subgroup 6_uncultured bacterium 92_uncultured bacterium 92	0.0664	-0.0299	-0.0326	0.0482	0.0247	0.0794	0.0742	0.0641	-0.0352	0.0456	-0.0143	-0.03
Acidobacteria_Subgroup 6_uncultured bacterium 98_uncultured bacterium 98	0.1055.	0.0742	-0.0039	0.0977	0.056	0.1055.	0.0247	0.1034	-0.0508	0.1055.	-0.0534	-0.0821
Acidobacteria_Subgroup 6_uncultured bacterium DA008_uncultured bacterium DA008	0.1164.	0.0315	0.0728	0.0585	0.0716	-0.0516	0.0317	0.015	-0.0398	-0.028	0.122.	0.1616*
Acidobacteria_Subgroup 6_uncultured bacterium DA023_uncultured bacterium DA023	-0.0864	-0.0232	-0.1618*	0.0327	-0.1181.	-0.1423*	0.1512*	0.0673	0.0304	0.0805	-0.0479	-0.036
Acidobacteria_Subgroup 6_uncultured bacterium mle1-25_uncultured bacterium mle1-25	0.0697	0.0232	0.1234.	0.0054	0.0304	0.0485	-0.0812	-0.015	-0.0776	0.0303	0.0461	0.0463
Acidobacteria_Subgroup 6_uncultured deep-sea bacterium_uncultured deep-sea bacterium	0.0576	0.0356	-0.0025	0.0173	0.0078	0.018	0.096	-0.0032	-0.0532	0.0428	0.031	9e-04
Acidobacteria_Subgroup 6_uncultured Geothrix sp._uncultured Geothrix sp.	0.1055.	0.0742	-0.0039	0.0977	0.056	0.1055.	0.0247	0.1034	-0.0508	0.1055.	-0.0534	-0.0821
Acidobacteria_Subgroup 6_uncultured Holophaga sp._uncultured Holophaga sp.	0.0758	-0.0925	-0.0474	0.1568*	-0.0278	0.1377*	0.0209	0.3292***	0.0314	0.0142	-0.2488***	-0.2586***
Acidobacteria_Subgroup 6_uncultured microorganism_uncultured microorganism	0.1295*	0.0047	-0.029	0.1186.	0.0823	0.2263***	0.0055	0.2144***	-0.0036	0.0254	-0.0817	-0.1108.
Acidobacteria_Subgroup 6_uncultured prokaryote_uncultured prokaryote	0.1401*	0.0567	0.0931	0.0885	0.1499*	0.0458	-0.2113***	0.0662	-0.0046	-0.0082	-0.009	0.0555
Acidobacteria_Subgroup 6_uncultured proteobacterium_uncultured proteobacterium	0.1697**	0.0309	0.117.	0.0081	0.1323*	0.0545	0.0237	0.1082.	-0.1268*	0.079	0.0503	0.0442
Acidobacteria_Subgroup 6_unidentified_unidentified	-0.0648	-0.2662***	-0.2635***	-0.0569	-0.3217***	-0.1564*	0.1798**	0.3105***	0.2197***	-0.1218.	-0.1808**	-0.1442*
Acidobacteria_Subgroup 6_Unknown Order_Unknown Family	0.1422*	0.0699	0.1072.	0.0635	0.0449	-0.0758	-0.0275	-0.148*	-0.0445	0.0351	0.2184***	0.2348***
Acidobacteria_Subgroup 6_wastewater metagenome_wastewater metagenome	-0.0446	-0.0928	-0.078	-0.0642	-0.065	0.1189.	-0.0277	0.1053.	0.0731	-0.0577	-0.1344*	-0.1691**
Acidobacteria_Thermoanaerobaculia_Thermoanaerobaculales_Thermoanaerobaculaceae	-0.1973**	-0.1987**	-0.2831***	-0.1753**	-0.2111***	-0.113.	0.1159.	0.0883	0.155*	0.1377*	-0.2465***	-0.2728***
Actinobacteria_0319-7L14_uncultured bacterium_uncultured bacterium	-0.1037	-0.0345	0.0455	-0.1244*	-0.0852	-0.1202.	-0.0686	-0.2066***	-0.0539	0.1186.	-0.019	-0.0183
Actinobacteria_Acidimicrobiia_Acidimicrobiales_Acidimicrobiaceae	-0.0204	-0.0098	0.0974	-0.1381*	-0.0053	-0.0581	-0.0234	-0.1267*	-0.1109.	0.1608*	0.0506	0.0604
Actinobacteria_Acidimicrobiia_Actinomarinales_uncultured	0.2629***	0.1315*	0.0527	0.2553***	0.1358*	0.2246***	0.1024	0.1558*	-0.1157.	0.1298*	0.04	-0.0086
Actinobacteria_Acidimicrobiia_IMCC26256_actinobacterium BGR 88	0.0426	0.0318	0.0888	-0.0462	0.0299	0.0424	-0.0368	0.0209	-0.0722	0.0075	-0.008	-0.0255
Actinobacteria_Acidimicrobiia_IMCC26256_actinobacterium YJF2-33	-0.0643	0.0112	-0.0944	-0.0597	-0.0943	-0.0552	0.1441*	-0.0285	-0.0263	0.0988	-0.0235	-0.0309
Actinobacteria_Acidimicrobiia_IMCC26256_bacterium enrichment culture clone auto73_4W	-0.2653***	-0.0533	-0.1425*	-0.3066***	-0.1886**	-0.2189***	0.0925	-0.2509***	0.0342	0.1376*	-0.0139	-0.0164
Actinobacteria_Acidimicrobiia_IMCC26256_metagenome	-0.0057	-0.0358	0.005	-0.0657	0.0658	0.057	-0.0988	-0.0326	0.0426	-0.1014	0.0497	0.0952
Actinobacteria_Acidimicrobiia_IMCC26256_NA	0.2407***	0.3002***	0.2789***	0.1357*	0.1496*	0.1071.	-0.0126	-0.1349*	-0.2607***	0.1864**	0.2178***	0.1696**
Actinobacteria_Acidimicrobiia_IMCC26256_uncultured Acidimicrobiales bacterium	0.0688	0.0273	0.09	0.0801	0.0395	-0.0156	-0.1169.	-0.0359	0.0044	-0.0569	0.0426	0.032
Actinobacteria_Acidimicrobiia_IMCC26256_uncultured Acidimicrobidae bacterium	-0.0062	-0.0847	-0.0153	-0.0424	-0.0126	0.0313	-0.0767	0.155*	0.0309	-0.0401	-0.1465*	-0.1217.
Actinobacteria_Acidimicrobiia_IMCC26256_uncultured Aciditerrimonas sp.	-0.0846	-0.0508	-0.0169	0.0664	-0.0065	-0.0664	-0.082	-0.0916	0.0716	-0.0742	-0.0977	-0.1042.
Actinobacteria_Acidimicrobiia_IMCC26256_uncultured Acidothermaceae bacterium	0.1053.	0.0327	0.0504	0.1718**	0.0716	0.0869	0.0018	0.0636	-0.0384	-0.0013	-0.0361	-0.0481
Actinobacteria_Acidimicrobiia_IMCC26256_uncultured actinobacterium	-0.0912	-0.0752	0.0099	-0.1177.	-0.0875	-0.0264	-0.0454	-0.0523	0.0223	-0.0046	-0.0239	0.0021
Actinobacteria_Acidimicrobiia_IMCC26256_uncultured Ferrimicrobium sp.	-0.4375***	-0.2356***	-0.4559***	-0.2036**	-0.3941***	-0.4078***	0.3492***	-0.1253*	0.1879**	0.147*	-0.1425*	-0.1555*
Actinobacteria_Acidimicrobiia_IMCC26256_uncultured organism	-0.03	-0.0556	-0.0292	-0.0285	-0.102	-0.0275	-0.0475	-0.0627	0.1277*	-0.1353*	0.0604	0.0392
Actinobacteria_Acidimicrobiia_Microtrichales_Iamiaceae	0.0562	0.0051	-0.0272	0.1633**	-0.0879	-0.02	0.0678	0.0192	0.0279	0.0024	0.0123	0.0279
Actinobacteria_Acidimicrobiia_Microtrichales_Ilumatobacteraceae	-0.259***	-0.3397***	-0.3048***	-0.095	-0.1681**	-0.0608	0.0766	0.1036	0.2128***	-0.12.	-0.2345***	-0.201**
Actinobacteria_Acidimicrobiia_Microtrichales_metagenome	0.0185	-0.0368	0.0081	-0.0605	0.0908	0.0968	-0.1394*	-0.1086.	0.0783	-0.1467*	0.1106.	0.1089.
Actinobacteria_Acidimicrobiia_Microtrichales_Microtrichaceae	0.0314	0.0535	9e-04	0.095	-0.0398	0.0927	0.0782	-6e-04	0.0211	-0.0506	0.0198	-0.0408
Actinobacteria_Acidimicrobiia_Microtrichales_NA	-0.2399***	-0.1612*	-0.2082***	-0.1495*	-0.1553*	-0.1908**	-0.0208	-0.0019	0.1422*	-0.0029	-0.1645**	-0.0846
Actinobacteria_Acidimicrobiia_Microtrichales_uncultured	-0.1201.	-0.1552*	-0.1038	0.0549	-0.0854	0.0485	-0.0591	0.0983	0.2129***	-0.2168***	-0.0965	-0.0531
Actinobacteria_Acidimicrobiia_NA_NA	0.0842	4e-04	-0.0363	0.1253*	0.0019	0.1089.	0.0288	0.0714	0.0403	-0.0456	-0.0113	-0.0616
Actinobacteria_Acidimicrobiia_uncultured_metagenome	-0.0497	-0.0396	0.0207	-0.0419	-0.0078	-0.0198	-0.0304	-0.0883	-0.0148	0.0337	-0.0461	-0.0174
Actinobacteria_Acidimicrobiia_uncultured_NA	0.0182	0.0561	0.0699	0.0659	0.0259	-0.0465	0.0104	-0.1362*	-0.0304	0.0029	0.0854	0.0896
Actinobacteria_Acidimicrobiia_uncultured_uncultured Acidimicrobiales bacterium	-0.0125	0.0424	0.0432	-0.0212	-0.0686	-0.0395	0.0734	-0.0455	-0.0053	-0.0026	0.0678	0.1061.
Actinobacteria_Acidimicrobiia_uncultured_uncultured Acidimicrobidae bacterium	-0.0663	-0.058	0.0428	-0.0152	-0.006	-0.048	-0.0658	-0.0544	-0.0381	0.0709	-0.0945	-0.0812
Actinobacteria_Acidimicrobiia_uncultured_uncultured actinobacterium	0.1546*	0.0449	3e-04	0.1669**	0.067	0.0962	0.0225	0.117.	-0.0217	0.0492	-0.0019	-0.0093
Actinobacteria_Acidimicrobiia_uncultured_uncultured forest soil bacterium	-0.1015	0.0461	-0.083	-0.1015	-0.1421*	-0.1125.	0.1273*	-0.1299*	-0.0203	0.0941	-0.0055	-0.0277
Actinobacteria_Acidimicrobiia_uncultured_uncultured Iamia sp.	-0.0314	0.0737	0.0646	-0.1417*	-0.0462	-0.0175	0.0041	-0.166**	-0.083	0.0878	0.0541	0.018
Actinobacteria_Acidimicrobiia_uncultured_uncultured soil bacterium	0.3251***	0.1563*	0.0943	0.3316***	0.1295*	0.2086***	0.0728	0.2234***	-0.1212.	0.1182.	0.017	-0.0072
Actinobacteria_Actinobacteria_Catenulisporales_Catenulisporaceae	-0.0237	0.0354	0.0695	-0.1522*	0.0046	-0.0801	0.1052.	-0.1304*	-0.1336*	0.2027**	0.0724	0.0708
Actinobacteria_Actinobacteria_Corynebacteriales_Corynebacteriaceae	-0.043	-0.0378	-0.0964	0.0794	-0.082	-0.0846	0.1081.	0.0406	0.056	0.0013	-0.0195	-0.0378
Actinobacteria_Actinobacteria_Corynebacteriales_Corynebacteriales Incertae Sedis	-0.0846	-0.0508	-0.0169	0.0664	-0.0065	-0.0664	-0.082	-0.0916	0.0716	-0.0742	-0.0977	-0.1042.
Actinobacteria_Actinobacteria_Corynebacteriales_Mycobacteriaceae	0.1837**	0.1297*	0.3739***	-0.0454	0.2488***	-0.1174.	-0.2152***	-0.4726***	-0.1293*	-0.0991	0.4725***	0.5216***
Actinobacteria_Actinobacteria_Corynebacteriales_NA	-0.1029	-0.1029	-0.1003	-0.1029	-0.0742	-0.0742	-0.0221	-0.0079	0.1029	-0.0951	-0.0846	-0.0638
Actinobacteria_Actinobacteria_Corynebacteriales_Nocardiaceae	-0.0106	0.0912	-0.024	0.0033	-0.0726	-0.0241	0.121.	-0.0522	-0.073	0.1588*	-0.0378	-0.059
Actinobacteria_Actinobacteria_Frankiales_Acidothermaceae	0.1859**	0.3907***	0.3776***	-0.161*	0.2682***	0.1073.	-0.1083.	-0.3575***	-0.464***	0.3511***	0.1995**	0.1211.
Actinobacteria_Actinobacteria_Frankiales_Cryptosporangiaceae	0.0584	0.0689	0.1543*	0.2196***	0.1966**	0.1254*	-0.2836***	-0.1239*	-0.0123	-0.0857	0.0073	8e-04
Actinobacteria_Actinobacteria_Frankiales_Frankiaceae	-0.2603***	-0.1412*	-0.2554***	-0.1734**	-0.3624***	-0.3481***	0.2981***	-0.0954	0.1164.	0.0882	-0.0081	-0.0014
Actinobacteria_Actinobacteria_Frankiales_Geodermatophilaceae	-0.2163***	-0.2**	-0.1336*	-0.2562***	-0.3195***	-0.3813***	0.1857**	-0.2575***	0.1587*	-0.0823	0.2864***	0.3246***
Actinobacteria_Actinobacteria_Frankiales_NA	0.2904***	0.418***	0.4965***	-0.0155	0.378***	0.1438*	-0.1673**	-0.3528***	-0.4369***	0.2356***	0.3521***	0.3329***
Actinobacteria_Actinobacteria_Frankiales_Nakamurellaceae	-0.2918***	-0.3467***	-0.2153***	-0.106.	-0.225***	0.0793	-0.0671	0.2265***	0.3193***	-0.3287***	-0.2851***	-0.2629***
Actinobacteria_Actinobacteria_Frankiales_Sporichthyaceae	-0.0407	-0.0639	-0.0117	0.0446	-0.0651	-0.1982**	-0.0398	-0.2166***	0.0988	-0.0528	0.0831	0.0996
Actinobacteria_Actinobacteria_Frankiales_uncultured	-0.1951**	-0.0915	-0.1472*	-0.1046.	-0.2767***	-0.3115***	0.1137.	-0.232***	0.1403*	-0.0266	0.0613	0.115.
Actinobacteria_Actinobacteria_Glycomycetales_Glycomycetaceae	0.1546*	0.0865	0.0865	0.2122***	0.0341	0.1755**	0.1126.	0.1291*	-0.055	-0.0498	0.0603	0.0236
Actinobacteria_Actinobacteria_Kineosporiales_Kineosporiaceae	0.2881***	0.2858***	0.3604***	0.1269*	0.2455***	0.0059	-0.0798	-0.3377***	-0.2509***	0.0798	0.4152***	0.4087***
Actinobacteria_Actinobacteria_Micrococcales_Cellulomonadaceae	-0.0316	-0.0808	-0.0653	0.1224.	-0.0358	0.1506*	0.0038	0.1373*	0.1295*	-0.1937**	-0.0879	-0.1414*
Actinobacteria_Actinobacteria_Micrococcales_Dermatophilaceae	-0.1032	-0.1208.	-0.0986	-0.0995	-0.0218	0.1035	-0.0759	0.0353	0.1273*	-0.13*	-0.0829	-0.1014
Actinobacteria_Actinobacteria_Micrococcales_Intrasporangiaceae	-0.1459*	-0.4116***	-0.2644***	0.0576	-0.3743***	0.014	0.1364*	0.1917**	0.4552***	-0.4558***	0.0598	0.0832
Actinobacteria_Actinobacteria_Micrococcales_Microbacteriaceae	-0.3752***	-0.3659***	-0.4636***	0.0128	-0.461***	-0.0668	0.1815**	0.3574***	0.4881***	-0.3978***	-0.3023***	-0.3097***
Actinobacteria_Actinobacteria_Micrococcales_Micrococcaceae	-0.1548*	-0.2052**	-0.2481***	-0.0535	-0.2159***	0.1145.	0.1473*	0.2441***	0.1865**	-0.1161.	-0.1765**	-0.2624***
Actinobacteria_Actinobacteria_Micromonosporales_Micromonosporaceae	-0.0945	-0.1878**	-0.0947	-0.0393	-0.2211***	-0.0778	0.1479*	0.1295*	0.0399	0.046	-0.1205.	-0.1099.
Actinobacteria_Actinobacteria_NA_NA	-0.014	0.0037	0.0021	-0.0699	0.0188	0.0598	-0.0158	-0.0533	-0.015	0.0055	0.0119	-0.0423
Actinobacteria_Actinobacteria_PeM15_Actinomycetales bacterium GP-5	0.0323	-0.016	0.0446	-0.0583	0.0246	0.0112	0.05	-0.0367	-0.0973	0.1351*	0.0308	0.0271
Actinobacteria_Actinobacteria_PeM15_bacterium rJ7	0.1055.	0.0742	-0.0039	0.0977	0.056	0.1055.	0.0247	0.1034	-0.0508	0.1055.	-0.0534	-0.0821
Actinobacteria_Actinobacteria_PeM15_metagenome	-0.0378	-0.0117	-0.0794	0.0352	-0.0924	-0.1003	0.1029	0.0223	0.0404	0.0065	0.0039	-0.0091
Actinobacteria_Actinobacteria_PeM15_NA	0.1698**	0.1155.	0.1291*	0.0974	0.1834**	0.0113	-0.1698**	0.0706	-0.1155.	0.1291*	-0.0476	0.0068
Actinobacteria_Actinobacteria_PeM15_uncultured actinobacterium	0.0887	-0.0231	-0.037	0.057	0.0372	0.1023	0.0644	0.1599*	-0.0223	0.0541	-0.0985	-0.1197.
Actinobacteria_Actinobacteria_PeM15_uncultured soil bacterium	0.0977	0.0664	0.0742	0.056	0.1055.	0.0065	-0.0977	0.0406	-0.0664	0.0742	-0.0273	0.0039
Actinobacteria_Actinobacteria_Propionibacteriales_Nocardioidaceae	0.0727	-0.2524***	-0.1663**	0.2239***	-0.2993***	0.0137	0.2174***	0.3616***	0.2878***	-0.2533***	0.0468	0.1072.
Actinobacteria_Actinobacteria_Propionibacteriales_Propionibacteriaceae	-0.131*	-0.1347*	-0.1079.	-0.1143.	-0.057	0.0423	-0.0851	0.013	0.131*	-0.13*	-0.0866	-0.1014
Actinobacteria_Actinobacteria_Pseudonocardiales_Pseudonocardiaceae	0.0598	-0.0263	-0.0167	0.0173	-0.0773	0.0485	0.1515*	0.0498	-0.073	0.1234.	0.0238	0.006
Actinobacteria_Actinobacteria_Streptomycetales_Streptomycetaceae	-0.0877	-0.1231.	-0.0456	-0.0731	-0.1678**	-0.2301***	0.0691	-0.1085.	0.0926	-0.0265	0.0584	0.1125.
Actinobacteria_Actinobacteria_Streptosporangiales_Nocardiopsaceae	-0.0023	-0.0021	-0.0428	0.0513	-0.0649	-0.0042	0.109.	0.0611	0.0279	-0.0091	0.0147	0.0073
Actinobacteria_Actinobacteria_Streptosporangiales_Streptosporangiaceae	0.0354	-0.0505	-0.0743	0.0619	-0.0865	0.0564	0.0699	0.2401***	-0.014	0.0735	-0.1901**	-0.1932**
Actinobacteria_Actinobacteria_Streptosporangiales_Streptosporangiales Incertae Sedis	-0.0155	-0.0299	-0.054	0.0238	-0.0624	-0.0473	0.035	-0.0375	0.1123.	-0.1242*	0.1052.	0.1173.
Actinobacteria_Actinobacteria_Streptosporangiales_Thermomonosporaceae	-0.0381	-0.0264	-0.1101.	0.0571	-0.179**	-0.102	0.1557*	0.0863	0.018	0.0757	-0.0653	-0.0814
Actinobacteria_Coriobacteriia_CG2-30-50-142_Actinobacteria bacterium CG2_30_50_142	-0.2276***	-0.2342***	-0.2598***	-0.1064.	-0.1464*	0.0562	-0.0354	0.1329*	0.2437***	-0.1609*	-0.2212***	-0.264***
Actinobacteria_Coriobacteriia_CG2-30-50-142_uncultured actinobacterium	-0.0972	-0.0903	-0.0797	-0.151*	-0.1392*	-0.0608	0.0192	-0.0065	0.0372	0.0378	-0.0811	-0.0619
Actinobacteria_Coriobacteriia_Coriobacteriales_Coriobacteriales Incertae Sedis	-0.0846	-0.0508	-0.0169	0.0664	-0.0065	-0.0664	-0.082	-0.0916	0.0716	-0.0742	-0.0977	-0.1042.
Actinobacteria_Coriobacteriia_FS118-23B-02_marine sediment metagenome	-0.0202	-0.0414	-0.1052.	0.053	-0.083	-0.0136	0.0515	0.0495	0.1153.	-0.0704	0.0096	-0.0224
Actinobacteria_Coriobacteriia_FS118-23B-02_uncultured bacterium	-0.4052***	-0.3391***	-0.5425***	-0.099	-0.3464***	-0.1913**	0.1365*	0.1811**	0.3856***	-0.1299*	-0.4162***	-0.4364***
Actinobacteria_Coriobacteriia_NA_NA	-0.2405***	-0.1624**	-0.2655***	-0.1168.	-0.2797***	-0.1556*	0.1387*	0.033	0.1739**	-0.0574	-0.1886**	-0.2205***
Actinobacteria_Coriobacteriia_OPB41_Coriobacteriaceae bacterium EMTCatB1	-0.1245*	-0.0197	-0.1349*	-0.1501*	-0.1412*	-0.0813	0.0977	-0.0065	0.0638	0.0014	-0.085	-0.0918
Actinobacteria_Coriobacteriia_OPB41_NA	0.1576*	0.1389*	0.0791	0.3591***	0.0542	-0.1252*	-0.0061	-0.0398	0.0296	-0.0748	0.2196***	0.3083***
Actinobacteria_Coriobacteriia_OPB41_uncultured actinobacterium	0.0299	0.0586	0.0664	-0.0195	0.069	0.0195	-0.0716	-0.0353	-0.043	0.0352	0.0117	0.0195
Actinobacteria_Coriobacteriia_OPB41_uncultured Coriobacteriaceae bacterium	-0.0247	-0.0195	0.0586	-0.0898	-0.0273	-0.0404	-0.0534	-0.0916	-0.0586	0.0898	0.0195	0.0274
Actinobacteria_Coriobacteriia_OPB41_uncultured Coriobacteriales bacterium	-0.0899	-0.0269	-0.1154.	-0.0526	-0.0777	-0.052	0.0535	0.0317	0.0822	-0.021	-0.0432	-0.0567
Actinobacteria_Coriobacteriia_OPB41_uncultured Coriobacteriia bacterium	0.0499	0.028	-0.0326	0.0177	-0.0189	0.0229	0.0936	0.0126	-0.0745	0.1502*	-0.0191	-0.047
Actinobacteria_Coriobacteriia_OPB41_uncultured Gordonibacter sp.	-0.0547	0.0817	0.0055	-0.1004	-0.0326	-0.0676	0.1228.	-0.105.	-0.0892	0.1386*	0.0526	0.0426
Actinobacteria_Coriobacteriia_OPB41_uncultured soil bacterium	-0.1227.	0.0407	-0.1099.	-0.0257	-0.1937**	-0.1394*	0.1753**	-0.0438	0.0364	0.0754	-0.042	-0.0677
Actinobacteria_FFCH16263_uncultured bacterium_uncultured bacterium	0.0654	0.0668	0.0729	0.0334	0.1528*	0.0804	-0.1657**	-0.037	-0.0407	-0.0065	0.0017	0.0022
Actinobacteria_KIST-JJY010_uncultured bacterium_uncultured bacterium	0.0738	0.0796	0.1291*	-0.0137	0.0904	0.0146	-0.0855	-0.0631	-0.1261*	0.126*	0.0428	0.052
Actinobacteria_MB-A2-108_Actinobacteria bacterium RBG_19FT_COMBO_70_19_Actinobacteria bacterium RBG_19FT_COMBO_70_19	-0.0662	-0.3643***	-0.1956**	0.0723	-0.1681**	0.1435*	-0.114.	0.5499***	0.3426***	-0.3879***	-0.4045***	-0.3186***
Actinobacteria_MB-A2-108_metagenome_metagenome	0.0877	0.1075.	0.143*	-0.0023	0.0802	-0.0824	-0.0778	-0.0917	-0.1204.	0.1186.	0.0605	0.1042.
Actinobacteria_MB-A2-108_NA_NA	-0.2987***	-0.4958***	-0.469***	-0.2514***	-0.3682***	-0.1046.	0.1362*	0.279***	0.3561***	-0.1699**	-0.3515***	-0.3345***
Actinobacteria_MB-A2-108_uncultured actinobacterium_uncultured actinobacterium	0.1055.	0.0742	-0.0039	0.0977	0.056	0.1055.	0.0247	0.1034	-0.0508	0.1055.	-0.0534	-0.0821
Actinobacteria_MB-A2-108_uncultured Actinomycetales bacterium_uncultured Actinomycetales bacterium	0.0143	0.0221	0.0508	-0.0586	0.0456	-0.0195	0.0664	-0.0353	-0.0742	0.0977	0.0482	0.0495
Actinobacteria_MB-A2-108_uncultured alpha proteobacterium_uncultured alpha proteobacterium	-0.0334	-0.1491*	-0.0881	-0.0729	-0.0389	0.0548	0.0409	0.1467*	0.0794	-0.086	-0.148*	-0.1558*
Actinobacteria_MB-A2-108_uncultured bacterium_NA	-0.0351	-0.0277	0.083	-0.1273*	-0.0387	-0.0572	-0.0756	-0.1299*	-0.083	0.1273*	0.0277	0.0388
Actinobacteria_MB-A2-108_uncultured bacterium_uncultured bacterium	-0.0573	0.0542	0.0398	-0.112.	-0.0713	-0.1314*	0.0737	-0.1495*	-0.1191.	0.1892**	0.0803	0.0616
Actinobacteria_MB-A2-108_uncultured Catenulispora sp._uncultured Catenulispora sp.	0.0213	-0.0875	-0.0102	-0.0147	-0.0139	0.0746	-0.0156	0.1371*	0.0542	-0.0393	-0.0599	-0.0494
Actinobacteria_MB-A2-108_uncultured Catenuloplanes sp._uncultured Catenuloplanes sp.	0.0035	-0.0255	0.0245	0.028	0.032	0.0248	-0.091	0.0552	-0.0246	0.0171	-0.0918	-0.051
Actinobacteria_MB-A2-108_uncultured Micromonospora sp._uncultured Micromonospora sp.	-0.1751**	-0.0077	-0.2258***	-0.06	-0.2716***	-0.265***	0.2632***	0.0087	0.0604	0.126*	-0.0471	-0.0584
Actinobacteria_MB-A2-108_uncultured Nocardioidaceae bacterium_uncultured Nocardioidaceae bacterium	0.0301	-0.0187	0.0235	0.1229.	0.0236	-0.0234	-0.0048	0.022	0.0215	-0.0639	-0.0152	-0.0021
Actinobacteria_MB-A2-108_uncultured soil bacterium_uncultured soil bacterium	0.1097.	-0.0382	-0.0109	0.292***	-0.0398	0.1294*	0.0075	0.2773***	0.0483	-0.061	-0.1383*	-0.1205.
Actinobacteria_MB-A2-108_uncultured Streptomyces sp._uncultured Streptomyces sp.	-0.0173	-0.0156	0.0586	-0.08	0.0846	0.1459*	-0.2118***	0.0446	0.0268	-0.0817	-0.0376	-0.0385
Actinobacteria_NA_NA_NA	-0.2251***	-0.0393	-0.249***	-0.1679**	-0.3184***	-0.2689***	0.2968***	-0.0271	0.0349	0.1291*	-0.0962	-0.1223.
Actinobacteria_RBG-16-55-12_Actinobacteria bacterium GWC2_53_9_Actinobacteria bacterium GWC2_53_9	0.1834**	0.1291*	-0.0068	0.1698**	0.0974	0.1834**	0.043	0.1798**	-0.0883	0.1834**	-0.0928	-0.1427*
Actinobacteria_RBG-16-55-12_Actinobacteria bacterium RBG_16_55_12_Actinobacteria bacterium RBG_16_55_12	-0.0117	0.0508	0.0352	0.0169	-0.0378	-0.0013	0.0482	-0.0079	0.0143	-0.0404	0.0742	0.0951
Actinobacteria_RBG-16-55-12_uncultured actinomycete_uncultured actinomycete	0.043	0.0104	0.0091	0.0872	0.0013	-0.0326	0.0404	-0.0079	0.0299	-0.0534	0.0977	0.1055.
Actinobacteria_RBG-16-55-12_uncultured bacterium_uncultured bacterium	-0.1516*	-0.1041.	-0.1617*	-0.0962	-0.1586*	-0.1849**	0.09	0.0188	0.1173.	-0.0502	-0.0453	-0.0409
Actinobacteria_Thermoleophilia_Gaiellales_Gaiellaceae	-0.245***	-0.3736***	-0.4617***	-0.1541*	-0.4376***	-0.2356***	0.2454***	0.4055***	0.3453***	-0.1003	-0.3024***	-0.2493***
Actinobacteria_Thermoleophilia_Gaiellales_NA	0.0388	-0.1093.	-0.0578	0.1739**	-0.0241	0.1898**	-0.0022	0.2209***	0.0713	-0.0542	-0.1098.	-0.1222.
Actinobacteria_Thermoleophilia_Gaiellales_uncultured	-0.3631***	-0.1812**	-0.1853**	-0.342***	-0.2707***	-0.3098***	0.1275*	-0.3497***	0.0888	0.034	0.0496	0.0585
Actinobacteria_Thermoleophilia_NA_NA	-0.1011	-0.0103	-0.126*	-0.0296	-0.2086***	-0.2339***	0.17**	-0.0507	0.0452	0.0711	0.0177	0.0186
Actinobacteria_Thermoleophilia_Solirubrobacterales_67-14	0.0333	-0.1613*	-0.0173	-0.0104	-0.1124.	0.1663**	-0.0278	0.2274***	0.0762	-0.0897	-0.1026	-0.0824
Actinobacteria_Thermoleophilia_Solirubrobacterales_NA	-0.1107.	-0.0132	-0.0534	-0.0033	-0.0754	-0.1033	0.0051	-0.1299*	0.0408	-0.0059	-0.0722	-0.0879
Actinobacteria_Thermoleophilia_Solirubrobacterales_Solirubrobacteraceae	-0.1471*	0.1813**	-0.0284	-0.3158***	-0.2344***	-0.4301***	0.3988***	-0.4134***	-0.2114***	0.3595***	0.3256***	0.3054***
Actinobacteria_Thermoleophilia_uncultured_uncultured bacterium	0.043	0.0286	-0.0564	0.0353	-0.0012	0.0639	0.0908	0.0928	-0.0174	0.0976	-0.0588	-0.0972
Actinobacteria_WCHB1-81_uncultured actinobacterium_uncultured actinobacterium	0.01	-0.0273	-0.0158	0.0253	-0.0218	-0.058	0.0476	0.0057	0.0402	-0.0569	0.0191	0.0492
Actinobacteria_WCHB1-81_uncultured bacterium_uncultured bacterium	0.1549*	0.1109.	0.1149.	0.1589*	0.0666	0.0771	-0.0129	-0.0076	-0.0624	0.0313	0.0884	0.0546
Actinobacteria_WCHB1-81_uncultured eubacterium WCHB1-81_uncultured eubacterium WCHB1-81	0.0651	0.0296	-0.0339	0.0479	0.0687	0.1274*	-0.0521	0.0864	0.0011	0.048	-0.0887	-0.0957
Armatimonadetes_Armatimonadia_Armatimonadales_NA	-0.1256*	-0.1298*	-0.0656	-0.1999**	-0.0517	0.0614	-0.0653	-0.0558	0.0889	-0.073	-0.0539	-0.0554
Armatimonadetes_Armatimonadia_Armatimonadales_uncultured Armatimonadetes bacterium	0.0207	-0.0564	0.1025	-0.0015	-0.101	0.0611	-0.0301	0.128*	-0.0116	-0.0485	-0.0121	-0.0146
Armatimonadetes_Armatimonadia_Armatimonadales_uncultured bacterium	-0.0299	-0.0061	4e-04	-0.063	0.0051	0.0756	-0.0093	-0.0351	0.0042	-0.0336	0.0051	-0.0226
Armatimonadetes_Armatimonadia_Armatimonadales_uncultured Chloroflexi bacterium	-0.1117.	-0.0799	-0.0281	-0.0213	-0.0794	-0.1106.	-0.0379	-0.1291*	0.0806	-0.0473	-0.0424	-0.059
Armatimonadetes_Armatimonadia_Armatimonadales_uncultured eubacterium WD294	-0.0799	-0.0805	-0.0563	0.0316	-0.0433	-0.0291	-0.0342	-0.0523	0.1158.	-0.1323*	-0.0438	-0.0522
Armatimonadetes_Chthonomonadetes_Chthonomonadales_Chthonomonadaceae	-0.3909***	-0.2525***	-0.2612***	-0.2547***	-0.3801***	-0.2232***	0.12.	-0.0622	0.1873**	-0.0572	-0.2133***	-0.2315***
Armatimonadetes_Chthonomonadetes_Chthonomonadales_NA	0.0643	0.1703**	0.1412*	-0.0736	0.1397*	0.1689**	-0.0954	-0.117.	-0.1301*	0.0276	0.0916	0.035
Armatimonadetes_Chthonomonadetes_Chthonomonadales_uncultured Armatimonadetes bacterium	0.0325	0.0619	0.0747	-0.0143	0.1109.	0.1245*	-0.0475	-0.0448	-0.0596	0.0136	0.0702	0.037
Armatimonadetes_Chthonomonadetes_Chthonomonadales_uncultured bacterium	-0.0515	-0.114.	0.0022	-0.0468	-0.096	-0.0557	0.0312	0.0455	-0.0082	0.0593	-0.0826	-0.0866
Armatimonadetes_Chthonomonadetes_Chthonomonadales_uncultured bacterium SJA-22	-0.0151	0.0137	0.1593*	-0.1235.	0.1177.	0.0606	-0.2374***	-0.1115.	-0.0697	-0.0529	-0.0191	0.032
Armatimonadetes_Chthonomonadetes_Chthonomonadales_uncultured Lutispora sp.	0.1053.	-0.0177	0.0307	0.0672	0.0665	0.083	0.0202	0.0804	-0.0261	-0.0061	0.07	0.0898
Armatimonadetes_DG-56_NA_NA	0.0129	-0.0093	0.0183	-0.0433	0.0098	-0.067	-0.0518	0.0215	0.0148	-0.0017	0.0036	0.0184
Armatimonadetes_DG-56_uncultured Actinomycetales bacterium_uncultured Actinomycetales bacterium	0.0554	0.0405	0.0571	-0.0082	0.0678	-5e-04	-0.0902	-0.031	-0.0344	0.0374	0.0112	0.0549
Armatimonadetes_DG-56_uncultured bacterium UASB_TL26_uncultured bacterium UASB_TL26	-0.0773	-0.0674	-0.0107	-0.0459	0.007	0.0088	-0.0029	0.0117	0.0247	-0.0154	-0.0284	-0.0255
Armatimonadetes_DG-56_uncultured bacterium_uncultured bacterium	0.3314***	0.2899***	0.3324***	0.0882	0.2882***	0.1331*	-0.0456	-0.0573	-0.344***	0.2371***	0.1949**	0.1651**
Armatimonadetes_DG-56_uncultured soil bacterium_uncultured soil bacterium	0.1055.	0.0742	-0.0039	0.0977	0.056	0.1055.	0.0247	0.1034	-0.0508	0.1055.	-0.0534	-0.0821
Armatimonadetes_Fimbriimonadia_Fimbriimonadales_Fimbriimonadaceae	-0.1627**	-0.1627**	0.0044	-0.1965**	-0.1723**	-0.0741	0.0784	0.0158	-0.0758	0.1348*	-0.1568*	-0.151*
Armatimonadetes_Fimbriimonadia_Fimbriimonadales_NA	-0.056	-0.0317	-0.057	-0.0491	-0.0267	-0.0068	-0.0057	0.0068	0.0747	-0.0573	0.0224	-0.0079
Armatimonadetes_Fimbriimonadia_Fimbriimonadales_uncultured bacterium	-0.0662	-0.1323*	-0.0135	-0.1055.	-0.0531	0.054	-0.0299	0.1473*	0.0356	-0.027	-0.1506*	-0.1424*
Armatimonadetes_NA_NA_NA	0.0384	0.0384	0.0046	0.14*	0.0262	0.0722	0.0413	0.102	-0.061	0.079	-0.0923	-0.1142.
Armatimonadetes_uncultured bacterium_uncultured bacterium_uncultured bacterium	-0.2386***	-0.1632**	-0.1302*	-0.1861**	-0.163**	-0.0742	0.0123	-0.0468	0.135*	-0.0931	-0.1306*	-0.1156.
Armatimonadetes_uncultured_candidate division OP10 clone OPB50_candidate division OP10 clone OPB50	0.0087	0.0926	0.0107	0.022	0.005	-0.0757	0.1216.	-0.051	-0.0745	0.0816	0.0883	0.0782
Armatimonadetes_uncultured_metagenome_metagenome	-0.134*	-0.0394	-0.2279***	0.0169	-0.252***	-0.1334*	0.2296***	0.1217.	0.1012	0.0484	-0.1724**	-0.1997**
Armatimonadetes_uncultured_NA_NA	-0.0338	-0.0338	0.0202	-0.0641	-0.0179	0.0353	0.0355	0.0117	-0.051	0.0886	-0.0089	-0.0296
Armatimonadetes_uncultured_uncultured actinobacterium_uncultured actinobacterium	-0.0295	-0.1288*	-0.1215.	-0.046	-0.0989	0.0409	0.1426*	0.226***	0.0562	0.0149	-0.1692**	-0.1892**
Armatimonadetes_uncultured_uncultured Armatimonadetes bacterium_uncultured Armatimonadetes bacterium	-0.0132	-0.0067	0.0069	0.0849	-0.048	-0.1247*	-0.0365	-0.1352*	0.067	-0.0695	0.0338	0.0218
Armatimonadetes_uncultured_uncultured bacterium SJA-121_uncultured bacterium SJA-121	-0.0234	-0.0062	-0.0905	0.017	-0.0705	-0.0313	-0.0172	-0.0238	0.0968	-0.108.	0.0208	-0.0132
Armatimonadetes_uncultured_uncultured bacterium SJA-171_uncultured bacterium SJA-171	-0.0299	-0.0664	-0.0247	-0.0065	-0.0195	-0.0065	-0.0091	0.089	0.0221	-0.0299	-0.0898	-0.0664
Armatimonadetes_uncultured_uncultured bacterium SJA-176_uncultured bacterium SJA-176	0.065	0.0309	0.0251	0.0506	-0.019	0.0017	0.0543	-0.0469	0.0164	-0.0521	0.086	0.0471
Armatimonadetes_uncultured_uncultured bacterium_NA	0.0576	0.039	0.0386	0.0061	0.0205	0.0465	-0.0201	0.0089	-0.0775	0.1384*	-0.0242	-0.0391
Armatimonadetes_uncultured_uncultured bacterium_uncultured bacterium	0.1047.	0.1534*	0.2008**	0.0252	0.0015	0.0371	0.0069	-0.1388*	-0.1045.	-0.0065	0.165**	0.1579*
Armatimonadetes_uncultured_uncultured Chloroflexi bacterium_uncultured Chloroflexi bacterium	-0.1752**	-0.1605*	-0.1434*	-0.1401*	-0.1882**	-0.1084.	0.0855	0.1046.	0.1113.	-0.0505	-0.1611*	-0.1474*
Armatimonadetes_uncultured_uncultured Firmicutes bacterium_uncultured Firmicutes bacterium	-0.0241	-0.0775	-0.0074	-0.0654	-0.082	0.0067	-0.0161	0.1029	-0.0083	0.0449	-0.1383*	-0.1417*
Armatimonadetes_uncultured_uncultured soil bacterium_uncultured soil bacterium	0.1268*	0.0937	0.1381*	0.106.	0.0268	0.0915	0.0537	-3e-04	-0.101	-0.0032	0.123.	0.1083.
Atribacteria_JS1_NA_NA	0.1108.	0.0298	0.0629	0.0683	0.0962	-0.0386	-0.0575	0.0741	-0.0518	0.0445	0.009	0.0644
Bacteroidetes_Bacteroidia_Bacteroidales_Bacteroidaceae	0.01	0.0862	0.06	-0.0463	-0.0059	0.0098	-0.0112	-0.0519	-0.0718	0.075	-0.0023	-0.0154
Bacteroidetes_Bacteroidia_Bacteroidales_Bacteroidetes BD2-2	-0.0278	0.0726	0.0588	-0.0941	0.0419	-0.0158	-0.1124.	-0.2233***	-0.0172	-0.0106	0.1054.	0.0463
Bacteroidetes_Bacteroidia_Bacteroidales_Bacteroidetes vadinHA17	0.4575***	0.3809***	0.3558***	0.5063***	0.4032***	0.2136***	-0.1374*	0.0449	-0.2168***	-0.004	0.2578***	0.3116***
Bacteroidetes_Bacteroidia_Bacteroidales_Barnesiellaceae	0.0376	0.0309	0.0537	0.0338	-0.0564	-0.0521	-0.0138	-0.065	0.0134	-0.0111	0.1011	0.0861
Bacteroidetes_Bacteroidia_Bacteroidales_Dysgonomonadaceae	0.0026	-0.0306	-0.0282	0.013	0.0146	0.1023	0.019	0.0565	0.0352	-0.0449	0.0094	0.0062
Bacteroidetes_Bacteroidia_Bacteroidales_Marinilabiliaceae	0.1184.	0.0973	0.1063.	0.0825	0.1105.	0.066	-0.065	0.0403	-0.0791	0.0486	0.0086	0.0204
Bacteroidetes_Bacteroidia_Bacteroidales_NA	0.2198***	0.1283*	0.1507*	0.1558*	0.1291*	0.1342*	0.0782	0.116.	-0.1261*	0.0523	0.1158.	0.1144.
Bacteroidetes_Bacteroidia_Bacteroidales_Paludibacteraceae	0.0252	0.1019	0.1033	0.0397	-0.0192	-0.0468	0.0298	-0.1815**	-0.058	0.0768	0.1573*	0.147*
Bacteroidetes_Bacteroidia_Bacteroidales_Prolixibacteraceae	-0.0871	0.0966	-0.0179	-0.2704***	-0.0169	-0.1762**	-0.0259	-0.3255***	0.0317	0.0103	0.2809***	0.3311***
Bacteroidetes_Bacteroidia_Bacteroidales_Rikenellaceae	0.0891	0.1503*	0.1676**	0.2013**	0.1321*	0.029	-0.095	-0.1015	-0.0745	-0.0029	0.0187	0.0061
Bacteroidetes_Bacteroidia_Bacteroidales_SB-5	0.3934***	0.3054***	0.3037***	0.4208***	0.2586***	0.3009***	-0.0406	0.1204.	-0.19**	0.0512	0.1907**	0.1771**
Bacteroidetes_Bacteroidia_Bacteroidetes VC2.1 Bac22_metagenome	-0.0273	-0.0592	-0.1706**	0.0058	-0.2095***	-0.1082.	0.2406***	0.1006	0.0342	0.1171.	-0.0345	-0.0825
Bacteroidetes_Bacteroidia_Chitinophagales_37-13	-0.2471***	-0.2108***	-0.2659***	-0.2038**	-0.3534***	-0.2547***	0.2558***	-0.0168	0.1574*	0.1007	-0.067	-0.0945
Bacteroidetes_Bacteroidia_Chitinophagales_Chitinophagaceae	0.1142.	-0.1711**	0.075	0.2466***	-0.1065.	0.081	0.138*	0.1871**	0.0956	-0.1717**	0.175**	0.2115***
Bacteroidetes_Bacteroidia_Chitinophagales_NA	-0.1314*	-0.1571*	-0.2826***	-0.1186.	-0.2801***	-0.0044	0.2949***	0.2395***	0.0593	0.1027	-0.2473***	-0.3086***
Bacteroidetes_Bacteroidia_Chitinophagales_Saprospiraceae	-0.0375	-0.4228***	-0.3743***	0.1613*	-0.178**	0.2439***	0.1603*	0.6278***	0.3785***	-0.3142***	-0.3139***	-0.3606***
Bacteroidetes_Bacteroidia_Chitinophagales_uncultured	-0.1668**	-0.0957	-0.193**	-0.0561	-0.2566***	-0.0886	0.2013**	0.0258	0.152*	-0.0637	0.017	0.0218
Bacteroidetes_Bacteroidia_Cytophagales_Amoebophilaceae	0.0293	0.0296	0.0471	-0.0938	0.0682	0.1021	-0.0224	-0.0571	-0.0818	0.0537	0.0543	0.0137
Bacteroidetes_Bacteroidia_Cytophagales_Cyclobacteriaceae	0.092	0.0893	-0.048	0.0479	0.0269	0.072	0.0927	0.0645	-0.0855	0.185**	-0.0657	-0.0974
Bacteroidetes_Bacteroidia_Cytophagales_Cytophagaceae	0.1457*	0.11.	0.1619*	0.1358*	0.0621	0.2527***	0.0399	0.0196	-0.0872	-0.0227	0.142*	0.0575
Bacteroidetes_Bacteroidia_Cytophagales_Hymenobacteraceae	-0.1073.	-0.278***	-0.2353***	0.1246*	-0.2237***	0.075	0.0632	0.1045.	0.3734***	-0.4248***	-0.0253	-0.0511
Bacteroidetes_Bacteroidia_Cytophagales_Microscillaceae	0.1238*	-0.0281	0.137*	0.0365	0.1024	0.1728**	-0.0487	0.1565*	-0.1774**	0.2563***	-0.1874**	-0.2141***
Bacteroidetes_Bacteroidia_Cytophagales_MWH-CFBk5	0.1291*	0.0829	0.0278	0.1439*	0.0516	0.1365*	0.0573	0.1186.	-0.0553	0.0568	-0.0164	-0.0496
Bacteroidetes_Bacteroidia_Cytophagales_NA	-0.1347*	-0.1384*	-0.1255*	-0.1384*	-0.0978	0.0683	-0.024	0.013	0.1384*	-0.1421*	-0.1052.	-0.1274*
Bacteroidetes_Bacteroidia_Cytophagales_Spirosomaceae	0.1169.	-0.0044	0.0279	0.1812**	-0.1039.	0.1559*	0.1515*	0.1223.	0.0794	-0.1917**	0.1965**	0.1217.
Bacteroidetes_Bacteroidia_Flavobacteriales_Crocinitomicaceae	0.0532	-0.1429*	-0.0507	0.0749	-0.0052	0.1546*	-0.0278	0.2678***	0.0518	-0.0447	-0.1581*	-0.19**
Bacteroidetes_Bacteroidia_Flavobacteriales_Flavobacteriaceae	0.2191***	-0.0034	0.0034	0.316***	0.1006	0.3726***	0.0772	0.3181***	0.0097	-0.0466	-0.0129	-0.1268*
Bacteroidetes_Bacteroidia_Flavobacteriales_NS9 marine group	0	-0.0072	-0.0829	0.0638	-0.0291	0.1061.	0.086	0.123.	0.0627	-0.0239	-0.0437	-0.0883
Bacteroidetes_Bacteroidia_Flavobacteriales_Weeksellaceae	0.079	0.0118	0.1079.	0.1173.	-0.0715	0.0159	0.0309	-0.0263	-0.0209	-0.0205	0.0933	0.0607
Bacteroidetes_Bacteroidia_NA_NA	-0.1121.	-0.2094***	-0.2128***	-0.1114.	-0.1045.	0.0047	0.0604	0.1911**	0.1974**	-0.1969**	-0.1134.	-0.114.
Bacteroidetes_Bacteroidia_SM1A07_metagenome	0.0035	-0.001	-0.0501	0.0866	-0.0648	-0.0943	0.1017	0.0103	0.0498	-0.033	0.0717	0.068
Bacteroidetes_Bacteroidia_SM1A07_uncultured bacterium	0.0363	-0.0403	-0.0423	-0.0237	-0.0047	0.0873	0.0231	0.0839	-0.0198	0.0683	-0.0787	-0.0953
Bacteroidetes_Bacteroidia_Sphingobacteriales_AKYH767	0.0181	-0.1163.	-0.2049**	0.0092	-0.16*	-0.0781	0.2902***	0.2659***	0.0209	0.1917**	-0.1068.	-0.1491*
Bacteroidetes_Bacteroidia_Sphingobacteriales_CWT CU03-E12	-0.0105	0.0096	0.0422	-0.1	-0.0269	-0.0269	-0.007	-0.1104.	-0.0947	0.1473*	0.0147	0.0113
Bacteroidetes_Bacteroidia_Sphingobacteriales_env.OPS 17	-0.3429***	-0.117.	-0.381***	-0.2172***	-0.3878***	-0.3388***	0.3145***	-0.1748**	0.1155.	0.2194***	-0.1407*	-0.2021**
Bacteroidetes_Bacteroidia_Sphingobacteriales_FFCH9454	-0.1039.	-0.0918	-0.1058.	-0.0357	-0.1014	-0.1376*	0.0873	-0.0135	0.0791	-0.0093	0.0038	0.0094
Bacteroidetes_Bacteroidia_Sphingobacteriales_KD3-93	0.0205	0.0623	-0.0819	0.0686	-0.0322	0.0162	0.2044**	0.0731	0.006	0.0604	0.0655	0.0283
Bacteroidetes_Bacteroidia_Sphingobacteriales_Lentimicrobiaceae	0.2952***	0.4685***	0.4703***	0.1416*	0.4057***	-0.0356	-0.242***	-0.4785***	-0.319***	0.1018	0.4652***	0.5093***
Bacteroidetes_Bacteroidia_Sphingobacteriales_LiUU-11-161	-0.0795	-0.0053	-0.1275*	-0.0647	-0.1436*	-0.0875	0.177**	-0.049	0.0019	0.0954	-0.0157	-0.0352
Bacteroidetes_Bacteroidia_Sphingobacteriales_NA	0.0854	0.0821	7e-04	0.054	-0.0133	-0.0067	0.1546*	0.0071	-0.0869	0.1314*	0.0373	0.0016
Bacteroidetes_Bacteroidia_Sphingobacteriales_NS11-12 marine group	-0.2276***	-0.1226.	-0.4004***	-0.0645	-0.4039***	-0.3305***	0.452***	0.0953	0.1684**	0.0611	-0.0536	-0.0298
Bacteroidetes_Bacteroidia_Sphingobacteriales_S15A-MN91	-0.0958	0.0182	0.0062	-0.147*	-0.0739	-0.1026	-0.0074	-0.2317***	-0.0284	0.0635	0.0453	0.0283
Bacteroidetes_Bacteroidia_Sphingobacteriales_Sphingobacteriaceae	-0.0501	-0.0671	-0.0871	0.1965**	-0.381***	-0.2125***	0.3506***	-0.1086.	0.1157.	-0.0368	0.1964**	0.1497*
Bacteroidetes_Bacteroidia_Sphingobacteriales_uncultured	0.072	0.0348	0.0366	0.0315	0.0884	0.0666	0.096	0.0207	-0.0994	0.0903	0.0073	0.0017
Bacteroidetes_Bacteroidia_Sphingobacteriales_Z4MB62	0.1966**	0.1344*	0.145*	0.0616	0.1896**	0.1015	-0.1121.	0.0124	-0.1497*	0.0839	0.064	0.0499
Bacteroidetes_Ignavibacteria_Ignavibacteriales_BSV40	0.0599	0.1351*	0.1918**	0.1544*	0.0928	-0.0473	-0.0895	-0.2683***	-0.019	-0.1066.	0.2469***	0.2484***
Bacteroidetes_Ignavibacteria_Ignavibacteriales_Ignavibacteriaceae	-0.1387*	-0.3274***	-0.2256***	-0.0584	-0.1135.	0.0535	-0.1576*	0.3285***	0.366***	-0.3866***	-0.1836**	-0.0712
Bacteroidetes_Ignavibacteria_Ignavibacteriales_LD-RB-34	-0.1459*	0.0977	-0.1659**	-0.1064.	-0.2098***	-0.2088***	0.2742***	-0.1351*	-0.036	0.1574*	0.0422	0.0081
Bacteroidetes_Ignavibacteria_Ignavibacteriales_NA	0.1177.	0.1592*	0.1343*	0.0234	0.0547	-0.0975	0.0576	-0.1807**	-0.1255*	0.0971	0.2596***	0.2217***
Bacteroidetes_Ignavibacteria_Ignavibacteriales_PHOS-HE36	0.1637**	0.1349*	0.1505*	0.0896	0.1883**	0.0107	-0.1636**	0.0184	-0.1055.	0.0993	0.0156	0.0642
Bacteroidetes_Ignavibacteria_Ignavibacteriales_SR-FBR-L83	0.0196	0.0935	0.0779	0.0388	0.0463	0.0424	-0.0548	-0.0518	-0.017	-0.0309	0.0418	0.0386
Bacteroidetes_Ignavibacteria_Ignavibacteriales_UA-50	0.0319	-1e-04	0.0346	0.2647***	-0.0227	0.0127	0.0648	0.0668	0.0654	-0.1344*	0.0354	0.0525
Bacteroidetes_Ignavibacteria_Ignavibacteriales_uncultured bacterium	0.0609	0.0398	0.0144	0.0741	0.066	0.0829	0.1222.	0.0386	-0.1238*	0.1873**	-0.0688	-0.1138.
Bacteroidetes_Ignavibacteria_Kryptoniales_BSV26	-0.1501*	-0.0206	-0.2639***	-0.0103	-0.0534	-0.2677***	0.1016	0.1294*	0.0742	0.1181.	-0.2364***	-0.2091***
Bacteroidetes_Ignavibacteria_Kryptoniales_MSB-3C8	0.1693**	0.1211.	0.1677**	0.0957	0.2459***	0.1919**	-0.243***	0.0633	-0.1375*	0.0156	-0.055	-0.0401
Bacteroidetes_Ignavibacteria_NA_NA	-0.0489	-0.009	0.0305	-0.0862	0.0192	-0.0052	-0.0497	-0.1675**	-0.0131	-0.03	0.0716	0.0511
Bacteroidetes_Ignavibacteria_OPB56_Candidatus Kapabacteria sp. 59-99	-0.1165.	-0.0772	-0.0889	-0.1427*	-0.0354	0.0093	0.0219	0.0117	0.0568	-0.0111	-0.0507	-0.059
Bacteroidetes_Ignavibacteria_OPB56_metagenome	-0.0061	-0.0257	-0.1099.	0.0149	-0.0587	0.0185	0.0731	0.1244*	0.0558	0.0028	-0.0916	-0.1134.
Bacteroidetes_Ignavibacteria_OPB56_NA	-0.0096	-0.0272	-0.0341	0.0402	-0.087	-0.0714	-0.0252	0.0588	0.0265	0.0074	-0.1589*	-0.1858**
Bacteroidetes_Ignavibacteria_OPB56_uncultured bacterium	-0.3669***	-0.3008***	-0.2245***	-0.3504***	-0.2428***	-0.0729	0.0511	-0.0437	0.1813**	-0.0569	-0.1591*	-0.1414*
Bacteroidetes_Ignavibacteria_OPB56_uncultured bacterium KF-JG30-B11	0.1028	0.183**	0.21***	-0.0029	0.0249	0.0417	0.0384	-0.1562*	-0.1841**	0.0108	0.2498***	0.2547***
Bacteroidetes_Ignavibacteria_OPB56_uncultured Chlorobi bacterium	0.0123	0.029	-0.1148.	0.0771	-0.1128.	-0.0482	0.0952	0.0543	0.0638	0.0581	-0.0084	-0.0548
Bacteroidetes_Ignavibacteria_OPB56_uncultured Chlorobiales bacterium	-0.1667**	-0.1515*	-0.3407***	-0.0178	-0.2762***	-0.1746**	0.359***	0.1622**	0.1391*	0.0677	-0.109.	-0.1365*
Bacteroidetes_Ignavibacteria_OPB56_uncultured prokaryote	0.1742**	0.2063***	0.2817***	0.0608	0.286***	0.2084***	-0.1839**	-0.0476	-0.1811**	-0.0277	0.1023	0.1194.
Bacteroidetes_Ignavibacteria_OPB56_uncultured soil bacterium	0.1055.	0.0742	-0.0039	0.0977	0.056	0.1055.	0.0247	0.1034	-0.0508	0.1055.	-0.0534	-0.0821
Bacteroidetes_Ignavibacteria_SJA-28_Chlorobi bacterium OLB5	0.297***	0.1537*	0.0178	0.2951***	0.1206.	0.2713***	0.1075.	0.2795***	-0.1255*	0.197**	-0.0697	-0.1314*
Bacteroidetes_Ignavibacteria_SJA-28_NA	-0.1294*	0.0398	-0.0725	-0.2116***	-0.0513	-0.0837	-0.0097	-0.1626**	-0.0221	0.0996	-0.0508	-0.0781
Bacteroidetes_Ignavibacteria_SJA-28_uncultured bacterium	0.0795	-0.0159	0.2484***	-0.0335	0.3864***	0.3001***	-0.4603***	0.1303*	-0.0602	-0.1588*	-0.1094.	-0.0312
Bacteroidetes_Ignavibacteria_SJA-28_uncultured Chlorobi bacterium	-0.1368*	-0.057	-0.1621**	-0.0533	-0.2737***	-0.1654**	0.2131***	-0.0254	0.0638	0.0645	-0.0504	-0.1026
Bacteroidetes_Ignavibacteria_SJA-28_uncultured Ignavibacterium sp.	0.0144	-0.0625	-0.088	0.0038	0.0252	0.1665**	-0.0031	0.1098.	0.0461	-0.015	-0.0929	-0.1285*
Bacteroidetes_Ignavibacteria_SJA-28_uncultured sludge bacterium	0.0872	0.0977	0.1029	-0.0117	0.0924	0.0664	-0.0638	-0.0589	-0.082	-0.0039	0.1055.	0.0664
Bacteroidetes_Ignavibacteria_SJA-28_uncultured soil bacterium	-0.0405	0.0414	-0.0539	-0.0493	-0.0971	-0.0845	0.0833	-0.1084.	0.0014	0.0398	0.1004	0.0664
Bacteroidetes_Rhodothermia_Rhodothermales_Rhodothermaceae	0.1055.	0.0742	-0.0039	0.0977	0.056	0.1055.	0.0247	0.1034	-0.0508	0.1055.	-0.0534	-0.0821
BRC1_metagenome_metagenome_metagenome	0.1576*	0.1209.	0.1769**	0.054	0.1629**	0.0798	-0.1477*	-0.0525	-0.1118.	0.031	0.0694	0.0655
BRC1_NA_NA_NA	0.1024	0.0987	0.1541*	-0.005	0.1038	0.0653	-0.0385	-0.1485*	-0.0788	0.0375	0.1911**	0.1859**
BRC1_Omnitrophica bacterium OLB16_Omnitrophica bacterium OLB16_Omnitrophica bacterium OLB16	-0.0405	-0.0342	0.0134	-0.0116	-0.0966	-0.0455	0.0277	0.0145	0.0045	0.0176	0.0045	0.0053
BRC1_soil bacterium WWH121_soil bacterium WWH121_soil bacterium WWH121	-0.0716	0.0326	-0.0586	-0.0716	-0.1003	-0.0794	0.0898	-0.0916	-0.0143	0.0664	-0.0039	-0.0195
BRC1_uncultured bacterium_uncultured bacterium_uncultured bacterium	0.0091	0.0027	-0.0137	0.0961	0.0116	-0.0164	-0.0162	0.0239	0.0433	-0.0486	0.0071	0.0053
BRC1_uncultured candidate division BRC1 bacterium_uncultured candidate division BRC1 bacterium_uncultured candidate division BRC1 bacterium	0.0824	0.1236.	0.1108.	0.0456	0.0685	0.0096	0.0581	-0.0394	-0.0692	-0.0046	0.1553*	0.1706**
BRC1_uncultured deep-sea bacterium_uncultured deep-sea bacterium_uncultured deep-sea bacterium	0.0463	-0.0645	-0.0039	0.015	-0.0146	0.0813	0.0206	0.1085.	-0.0259	0.0205	-0.0561	-0.0737
BRC1_uncultured delta proteobacterium_uncultured delta proteobacterium_uncultured delta proteobacterium	0.0708	0.1241*	0.0551	-0.0402	0.0694	0.1051.	-0.0148	-0.0299	-0.0784	0.0378	0.0539	-0.0062
BRC1_uncultured organism_uncultured organism_uncultured organism	-0.1718**	-0.1026	-0.1915**	-0.1094.	-0.192**	-0.1437*	0.0956	-0.0196	0.1391*	-0.0841	-0.0739	-0.085
BRC1_uncultured soil bacterium PBS-74_uncultured soil bacterium PBS-74_uncultured soil bacterium PBS-74	0.0472	0.0633	0.1005	0.0601	-0.0096	0.0286	-0.0424	-0.0184	-0.0807	0.0672	0.0295	0.0417
BRC1_uncultured soil bacterium PBS-II-1_uncultured soil bacterium PBS-II-1_uncultured soil bacterium PBS-II-1	0.0203	0.1087.	0.1163.	0.0894	0.1092.	0.0049	-0.1124.	-0.146*	-0.0705	0.0489	-0.0346	-0.0314
BRC1_uncultured soil bacterium PBS-II-34_uncultured soil bacterium PBS-II-34_uncultured soil bacterium PBS-II-34	0.0679	0.1235.	0.1345*	0.0442	0.0541	-0.0354	-0.0162	-0.1171.	-0.1346*	0.1263*	0.1237*	0.1208.
BRC1_uncultured soil bacterium PBS-II-4_uncultured soil bacterium PBS-II-4_uncultured soil bacterium PBS-II-4	-0.0038	0.0265	-0.003	0.0095	-0.0554	-0.1057.	0.0799	-0.0574	-0.0405	0.0778	0.076	0.0756
BRC1_uncultured soil bacterium PBS-III-18_uncultured soil bacterium PBS-III-18_uncultured soil bacterium PBS-III-18	0.0585	0.1006	0.0611	-0.042	0.0448	0.0506	0.0639	-0.0661	-0.0866	0.0483	0.1053.	0.0537
BRC1_uncultured soil bacterium PBS-III-24_uncultured soil bacterium PBS-III-24_uncultured soil bacterium PBS-III-24	-0.0247	-0.0195	0.0586	-0.0898	-0.0273	-0.0404	-0.0534	-0.0916	-0.0586	0.0898	0.0195	0.0274
BRC1_uncultured soil bacterium PBS-III-29_uncultured soil bacterium PBS-III-29_uncultured soil bacterium PBS-III-29	0.0722	0.0493	0.0916	0.0064	0.0708	0.0609	0.0541	0.0113	-0.1075.	0.1022	-0.0081	-0.0258
BRC1_uncultured soil bacterium PBS-III-4_uncultured soil bacterium PBS-III-4_uncultured soil bacterium PBS-III-4	0.0256	-0.0521	0.0567	0.1096.	0.0556	0.0081	-0.1378*	0.0878	0.0301	-0.0424	-0.1308*	-0.0891
BRC1_uncultured soil bacterium PRR-11_uncultured soil bacterium PRR-11_uncultured soil bacterium PRR-11	-0.0601	-0.0298	-0.0767	0.0147	-0.1667**	-0.154*	0.0699	-0.0362	0.1317*	-0.1044.	0.0731	0.0707
BRC1_uncultured soil bacterium_uncultured soil bacterium_uncultured soil bacterium	-0.0645	-0.0355	0.0037	0.0172	-0.1151.	-0.0518	-0.0365	-0.0965	0.0515	-0.0321	0.0017	-0.0361
Calditrichaeota_Calditrichia_Calditrichales_Calditrichaceae	-0.0931	-0.0356	-0.0262	0.0106	-0.0012	-0.0068	-0.0941	-0.0801	0.0897	-0.1012	-0.0438	-0.0509
Chlamydiae_Chlamydiae_Chlamydiales_Chlamydiaceae	0.0705	0.076	0.0397	0.0158	0.04	0.0242	0.0307	-0.0577	-0.0647	0.0398	0.089	0.0647
Chlamydiae_Chlamydiae_Chlamydiales_Criblamydiaceae	0.0506	-0.0554	-0.0023	7e-04	0.0742	0.0968	-0.0877	0.1366*	-0.0059	0.0074	-0.0946	-0.0846
Chlamydiae_Chlamydiae_Chlamydiales_cvE6	0.0834	0.1473*	0.0174	0.0208	0.0793	-0.0235	0.0987	-0.0434	-0.1734**	0.282***	-0.0121	-0.0405
Chlamydiae_Chlamydiae_Chlamydiales_NA	0.1033	0.0359	0.0336	0.1726**	0.0383	-0.0147	-0.0326	0.0898	-0.0026	0.0134	0.0068	0.011
Chlamydiae_Chlamydiae_Chlamydiales_Parachlamydiaceae	-0.3407***	-0.2706***	-0.3295***	-0.1218.	-0.2084***	-0.1436*	-3e-04	0.0659	0.266***	-0.0743	-0.3301***	-0.3656***
Chlamydiae_Chlamydiae_Chlamydiales_Simkaniaceae	0.1482*	0.2351***	0.1444*	0.1048.	0.1703**	0.0311	0.0569	-0.092	-0.2629***	0.3484***	0.0366	0.0126
Chlamydiae_Chlamydiae_Chlamydiales_Waddliaceae	-0.0657	-0.0654	-0.0178	-0.0905	-0.0168	0.0234	-0.0901	0.0346	0.0739	-0.0948	-0.0555	-0.0301
Chlamydiae_LD1-PA32_NA_NA	8e-04	0.0072	0.0658	-0.0401	-0.0215	0.0081	0.0405	0.026	-0.0358	0.0239	0.0337	0.0413
Chlamydiae_LD1-PA32_uncultured bacterium_uncultured bacterium	0.1018	0.1084.	0.1255*	0.0352	0.0986	0.0181	-0.099	-0.0573	-0.0701	0.0477	0.0794	0.0818
Chlamydiae_LD1-PA32_uncultured Clostridiales bacterium_uncultured Clostridiales bacterium	-0.0673	0.044	-0.0436	-0.0937	-0.0315	-0.004	0.0411	-0.059	-0.003	0.0383	5e-04	-0.0245
Chlamydiae_LD1-PA32_uncultured microorganism_uncultured microorganism	0.1384*	0.0941	0.1052.	0.0793	0.1495*	0.0092	-0.1384*	0.0575	-0.0941	0.1052.	-0.0387	0.0055
Chloroflexi_AD3_NA_NA	-0.2112***	0.0506	-0.0808	-0.3113***	-0.2014**	-0.2501***	0.193**	-0.2924***	-0.0811	0.1994**	0.035	-0.0103
Chloroflexi_AD3_uncultured Chloroflexi bacterium_uncultured Chloroflexi bacterium	-0.0742	9e-04	-0.0545	0.0556	-0.0808	-0.0947	0.0418	-0.0267	0.058	-9e-04	0.0149	0.0211
Chloroflexi_AD3_uncultured Clostridium sp._uncultured Clostridium sp.	-0.2843***	0.0531	-0.2764***	-0.2132***	-0.3692***	-0.3508***	0.3416***	-0.1441*	0.0316	0.1838**	-0.0663	-0.0878
Chloroflexi_AD3_uncultured forest soil bacterium_uncultured forest soil bacterium	-0.1576*	-0.0279	-0.1267*	-0.1441*	-0.1487*	-0.0731	0.0913	-0.061	0.0505	0.0144	-0.058	-0.0658
Chloroflexi_AD3_uncultured soil bacterium_uncultured soil bacterium	-0.1634**	-0.0422	-0.123.	-0.2156***	-0.1818**	-0.1282*	0.1178.	-0.1398*	-0.0326	0.1638**	-0.0467	-0.0571
Chloroflexi_AD3_uncultured Thermoflavimicrobium sp._uncultured Thermoflavimicrobium sp.	-0.2881***	0.1037	-0.1312*	-0.4131***	-0.1643**	-0.2667***	0.2703***	-0.3823***	-0.176**	0.33***	0.0633	-0.0469
Chloroflexi_AD3_uncultured Thermomicrobia bacterium_uncultured Thermomicrobia bacterium	0.1216.	0.1788**	0.1729**	-0.0504	0.1547*	0.0674	-0.0448	-0.1024	-0.1637**	0.0293	0.1233.	0.0824
Chloroflexi_Anaerolineae_1-20_metagenome	-0.0179	-0.0503	-0.0352	0.0077	-0.0703	-0.0184	-0.0052	-0.0331	0.1096.	-0.1277*	0.0649	0.0543
Chloroflexi_Anaerolineae_1-20_uncultured Chloroflexia bacterium	0.1055.	0.0742	-0.0039	0.0977	0.056	0.1055.	0.0247	0.1034	-0.0508	0.1055.	-0.0534	-0.0821
Chloroflexi_Anaerolineae_ADurb.Bin180_Chloroflexi bacterium ADurb.Bin180	-0.0099	-0.0475	-0.0281	-0.0047	-0.0371	-0.0422	-0.0287	-0.0351	0.078	-0.0653	0.0632	0.0623
Chloroflexi_Anaerolineae_ADurb.Bin180_metagenome	-0.1107.	-0.0127	-0.0536	-0.0041	-0.0759	-0.1034	0.006	-0.1299*	0.0403	-0.0051	-0.0717	-0.0874
Chloroflexi_Anaerolineae_ADurb.Bin180_NA	-0.0541	-0.0592	0.0249	0.0749	0.0083	0.0585	-0.1307*	0.0057	0.0901	-0.1428*	-0.0787	-0.0492
Chloroflexi_Anaerolineae_ADurb.Bin180_uncultured bacterium	-0.1236*	-0.0691	-0.0681	0.0684	-0.0468	0.003	-0.1295*	0.0337	0.1328*	-0.1358*	-0.12.	-0.1047.
Chloroflexi_Anaerolineae_ADurb.Bin180_uncultured bacterium SJA-68	0.0566	0.0776	0.082	0.1242*	0.0074	0.0593	-0.055	-0.0497	-0.0246	0.0048	0.019	0.002
Chloroflexi_Anaerolineae_ADurb.Bin180_uncultured organism	-0.0578	-0.0283	-0.0414	-0.0841	-0.0508	-0.058	0.0034	-0.0872	0.0736	-0.0582	0.0336	0.0527
Chloroflexi_Anaerolineae_Anaerolineales_Anaerolineaceae	0.4222***	0.4174***	0.4958***	0.2879***	0.578***	0.5027***	-0.4782***	-0.0933	-0.2216***	-0.1244*	0.2286***	0.1978**
Chloroflexi_Anaerolineae_Ardenticatenales_Ardenticatenaceae	-0.0378	-0.0117	-0.0794	0.0352	-0.0924	-0.1003	0.1029	0.0223	0.0404	0.0065	0.0039	-0.0091
Chloroflexi_Anaerolineae_Ardenticatenales_uncultured	0.0756	-0.114.	-0.0327	0.1967**	-0.0572	0.2424***	0.0233	0.4446***	0.078	-0.0729	-0.2739***	-0.2837***
Chloroflexi_Anaerolineae_C10-SB1A_uncultured bacterium	-0.1734**	-0.1234.	-0.1421*	-0.1657**	-0.2278***	-0.1995**	0.1405*	0.0189	0.0401	0.0684	-0.1059.	-0.1103.
Chloroflexi_Anaerolineae_Caldilineales_Caldilineaceae	-0.0385	-0.3371***	-0.2245***	0.1662**	-0.1982**	-0.0639	0.0492	0.1287*	0.3699***	-0.2851***	0.0171	0.0754
Chloroflexi_Anaerolineae_KZNMV-5-B42_uncultured bacterium	-0.0169	-0.0729	-0.0378	0.0716	-0.0143	-0.0143	-0.0039	0.0785	0.0352	-0.0352	-0.0651	-0.0534
Chloroflexi_Anaerolineae_MSB-5E12_uncultured bacterium	-0.0539	-0.0076	-0.0383	-0.0117	-0.0579	-0.059	0.0312	-0.0041	0.0676	-0.0564	0.0066	-0.0088
Chloroflexi_Anaerolineae_NA_NA	-0.1769**	-0.1705**	-0.2103***	-0.0905	-0.1691**	-0.1313*	-0.0202	-0.0529	0.2099***	-0.1045.	-0.0789	-0.0833
Chloroflexi_Anaerolineae_RBG-13-54-9_metagenome	-0.1888**	0.0661	0.0469	-0.2127***	0.2218***	0.2239***	-0.4364***	-0.1146.	0.035	-0.1433*	-0.2107***	-0.2802***
Chloroflexi_Anaerolineae_RBG-13-54-9_NA	-0.2857***	-0.1891**	-0.0989	-0.1865**	-0.0556	-0.016	-0.2634***	0.0668	0.189**	-0.2188***	-0.2915***	-0.2681***
Chloroflexi_Anaerolineae_RBG-13-54-9_uncultured Anaerolineaceae bacterium	-0.1102.	0.0187	-0.1105.	-0.1701**	-0.174**	-0.1728**	0.2729***	-0.1768**	-0.0213	0.0892	0.1529*	0.1016
Chloroflexi_Anaerolineae_RBG-13-54-9_uncultured bacterium	0.0366	-0.047	0.0867	-0.1804**	0.2765***	0.2333***	-0.4692***	-0.0178	0.0588	-0.1679**	-0.0443	-0.0771
Chloroflexi_Anaerolineae_RBG-13-54-9_uncultured bacterium UASB_TL14	0.0295	0.0322	0.1683**	-0.2005**	0.22***	0.2683***	-0.2581***	-0.1226.	-0.0922	0.0033	0.0841	0.039
Chloroflexi_Anaerolineae_RBG-13-54-9_uncultured Caldilineaceae bacterium	-0.3474***	-0.0979	-0.2748***	-0.3983***	-0.3002***	-0.2258***	0.1506*	-0.0758	0.0533	0.1016	-0.1665**	-0.1838**
Chloroflexi_Anaerolineae_RBG-13-54-9_uncultured Caldilineae bacterium	-0.2753***	-0.2658***	-0.3746***	-0.1879**	-0.3274***	-0.2322***	0.2006**	0.2223***	0.2275***	-0.0441	-0.3078***	-0.2671***
Chloroflexi_Anaerolineae_RBG-13-54-9_uncultured eubacterium WCHB1-50	-0.3078***	-0.0913	-0.1158.	-0.2839***	-0.0548	0.023	-0.2205***	-0.122.	0.1212.	-0.0935	-0.2487***	-0.3403***
Chloroflexi_Anaerolineae_RBG-13-54-9_uncultured planctomycete	0.1271*	0.0659	0.1275*	0.0588	0.2087***	0.1106.	-0.2334***	0.0466	-0.0433	0.0048	-0.0358	-0.0158
Chloroflexi_Anaerolineae_RBG-13-54-9_uncultured prokaryote	-0.2085***	-0.1096.	0.0347	-0.2627***	0.1171.	0.1815**	-0.366***	0.0925	0.064	-0.2489***	-0.193**	-0.1797**
Chloroflexi_Anaerolineae_RBG-13-54-9_uncultured sludge bacterium A31	-0.1658**	-0.2258***	-0.1781**	-0.1	-0.2716***	-0.1442*	0.0813	0.0265	0.1759**	-0.0689	-0.1068.	-0.1174.
Chloroflexi_Anaerolineae_RBG-13-54-9_uncultured soil bacterium	0.0616	0.0283	0.0338	0.0652	0.0377	0.038	-0.0613	-0.0029	0.0194	-0.0397	0.0392	0.0521
Chloroflexi_Anaerolineae_SBR1031_A4b	0.1263*	-0.0808	0.0308	0.089	-0.0103	0.4099***	0.0079	0.4005***	0.0422	-0.0549	-0.1457*	-0.2264***
Chloroflexi_Anaerolineae_SBR1031_anaerobic bacterium MO-CFX2	0.2871***	0.0431	0.095	0.354***	0.029	0.1791**	0.0142	0.3476***	0.0474	-0.1284*	0.0541	0.1126.
Chloroflexi_Anaerolineae_SBR1031_anaerobic digester metagenome	-0.1027	-0.1647**	-0.0704	-0.1304*	-0.119.	0.0237	-0.0748	0.144*	0.1014	-0.1211.	-0.1557*	-0.1689**
Chloroflexi_Anaerolineae_SBR1031_metagenome	0.4192***	0.3797***	0.3285***	0.2395***	0.4497***	0.34***	-0.199**	-0.0434	-0.2714***	0.1002	0.2021**	0.1378*
Chloroflexi_Anaerolineae_SBR1031_NA	0.2182***	0.1605*	0.217***	0.2132***	0.115.	0.2417***	-0.0555	0.1127.	-0.0928	-0.0024	0.0955	0.0762
Chloroflexi_Anaerolineae_SBR1031_uncultured bacterium	-0.1304*	0.0239	0.0303	-0.0992	-0.1055.	-0.1186.	-0.0901	-0.1746**	0.0186	-0.0092	0.0068	0.0314
Chloroflexi_Anaerolineae_SBR1031_uncultured Chlorobi bacterium	0.1235.	-0.0032	0.0868	0.0224	-0.0219	0.0625	-0.0804	0.021	0.0083	0.0271	0.0634	0.0223
Chloroflexi_Anaerolineae_SBR1031_uncultured compost bacterium	-0.0883	-0.1268*	-0.0883	-0.0747	0.0657	0.1698**	-0.1562*	0.0706	0.1426*	-0.1449*	-0.0747	-0.0929
Chloroflexi_Anaerolineae_SBR1031_uncultured Gemmatimonadetes bacterium	0.0482	0.1831**	0.195**	-0.131*	0.0983	0.0299	0.0172	-0.1798**	-0.2901***	0.326***	0.0782	-0.0116
Chloroflexi_Anaerolineae_SBR1031_uncultured sludge bacterium H5	0.0641	-0.0853	-0.0726	-0.0087	-3e-04	0.1863**	-0.002	0.285***	0.0471	-0.0062	-0.1943**	-0.2425***
Chloroflexi_Anaerolineae_SBR1031_uncultured soil bacterium	0.1999**	0.089	0.1765**	0.0734	0.0629	0.2634***	0.0067	0.1722**	-0.1592*	0.1496*	-0.0332	-0.0845
Chloroflexi_Anaerolineae_SBR1031_wastewater metagenome	-0.0362	-0.1005	-0.1502*	0.0333	-0.0784	0.1603*	0.0187	0.1813**	0.1076.	-0.0547	-0.1775**	-0.2286***
Chloroflexi_Anaerolineae_SJA-15_metagenome	0.0445	0.1307*	0.0685	0.0169	0.0279	-0.1088.	0.1034	-0.2124***	-0.0841	0.0868	0.19**	0.2113***
Chloroflexi_Anaerolineae_SJA-15_NA	-0.0252	-0.1515*	-0.0721	-0.0305	-0.0393	-0.0199	-0.1323*	0.0774	0.1452*	-0.2365***	-0.0588	0.0371
Chloroflexi_Anaerolineae_SJA-15_uncultured bacterium	0.064	-0.0491	0.0036	0.1214.	0.0109	-0.0776	-5e-04	0.0342	0.0165	0.0162	-0.0154	0.0422
Chloroflexi_Anaerolineae_SJA-15_uncultured bacterium SHA-3	0.0152	-0.034	0.0151	0.0292	-0.1238*	-0.1271*	-0.0445	-0.1473*	0.1449*	-0.1474*	0.1817**	0.1658**
Chloroflexi_Anaerolineae_SJA-15_uncultured bacterium SHD-58	0.0586	-0.0247	0.0143	0.0404	0.0299	-0.0612	0.0169	0.0641	-0.0065	-0.0117	0.0404	0.0873
Chloroflexi_Anaerolineae_SJA-15_uncultured bacterium SHD-71	-0.1473*	0.0127	-0.1694**	-0.1351*	-0.1448*	-0.1567*	0.133*	-0.1163.	0.0786	0.0378	0.051	0.0338
Chloroflexi_Anaerolineae_SJA-15_uncultured Chloroflexi bacterium	0.016	0.0546	0.0797	0.061	0.052	0.1262*	-0.0486	-0.0289	-0.0189	-0.0315	0.053	0.0256
Chloroflexi_Anaerolineae_SJA-15_uncultured soil bacterium	0.1077.	-0.1075.	-0.0355	0.1051.	0.0952	-0.0261	-0.1821**	0.0331	0.1725**	-0.2021**	0.111.	0.2142***
Chloroflexi_Anaerolineae_uncultured Bellilinea sp._uncultured Bellilinea sp.	-0.0865	-0.1231.	0.2251***	-0.2181***	0.2782***	0.3701***	-0.5759***	0.1412*	-0.0444	-0.175**	-0.3558***	-0.3315***
Chloroflexi_Anaerolineae_uncultured_metagenome	0.1462*	0.061	0.0359	0.1382*	0.0745	0.1463*	-0.0234	0.101	-0.0197	-0.0096	0.0083	0.0051
Chloroflexi_Anaerolineae_uncultured_NA	0.0695	0.0526	0.0314	0.1275*	0.0903	0.0268	-0.0899	0.031	-0.0271	0.0618	-0.1031	-0.1052.
Chloroflexi_Anaerolineae_uncultured_uncultured bacterium	0.1389*	0.0739	0.1057.	0.0352	0.1675**	0.0468	-0.2502***	0.0651	-0.0511	0.0614	-0.0911	-0.0396
Chloroflexi_Anaerolineae_uncultured_uncultured Chloroflexi bacterium	0.1101.	0.0225	0.0705	0.1312*	0.0491	-0.1791**	-0.047	-0.1561*	0.0221	-0.0545	0.2025**	0.2891***
Chloroflexi_Anaerolineae_uncultured_uncultured organism	-0.0161	0.0389	0.0092	-0.0388	0.0032	0.0486	0.0253	-0.0044	-0.0248	0.0108	0.0074	-0.0115
Chloroflexi_Chloroflexia_Chloroflexales_Chloroflexaceae	0.0186	-0.0534	-0.0764	-0.0787	-0.0362	0.2425***	-0.111.	0.2092***	0.097	-0.0901	-0.1831**	-0.2684***
Chloroflexi_Chloroflexia_Chloroflexales_Herpetosiphonaceae	0.1788**	0.1934**	0.2146***	0.0776	0.1742**	0.2382***	-0.0706	-0.0133	-0.1653**	0.0453	0.1117.	0.0638
Chloroflexi_Chloroflexia_Chloroflexales_Roseiflexaceae	-0.1726**	-0.4257***	-0.2642***	-0.0692	-0.3266***	0.0478	0.1156.	0.4929***	0.2523***	-0.1126.	-0.4003***	-0.3741***
Chloroflexi_Chloroflexia_Elev-1554_uncultured bacterium	-0.0519	-0.02	-0.0224	-0.0702	-0.1035	-0.0317	0.0317	-0.0024	-0.0111	0.0353	-0.0487	-0.0663
Chloroflexi_Chloroflexia_Kallotenuales_AKIW781	-0.1555*	-0.1678**	-0.1329*	-0.2118***	-0.2622***	-0.0195	0.0844	0.0308	0.0739	0.006	-0.1098.	-0.1418*
Chloroflexi_Chloroflexia_Thermomicrobiales_AKYG1722	0.154*	0.0826	0.0939	0.0905	0.0989	0.0965	-0.0014	0.0682	-0.1334*	0.1383*	0.0206	0.014
Chloroflexi_Chloroflexia_Thermomicrobiales_JG30-KF-CM45	-0.0453	-0.2175***	-0.0903	0.1027	-0.2025**	0.1457*	0.0165	0.2494***	0.1934**	-0.2195***	-0.173**	-0.1799**
Chloroflexi_Chloroflexia_Thermomicrobiales_NA	0.0941	-0.0424	-0.0461	0.0683	0.0351	0.1125.	0.1052.	0.0909	-0.0498	0.0646	-0.0203	-0.0425
Chloroflexi_Chloroflexia_Thermomicrobiales_Thermomicrobiaceae	0.0365	-0.0257	0.0548	-0.0474	-0.0169	0.0409	-0.009	-0.001	-0.0105	-0.0045	0.0573	0.0278
Chloroflexi_Dehalococcoidia_661239_NA	-0.042	0.006	-0.0483	0.037	-0.0821	-0.1224.	0.1024	-0.0457	-0.0053	0.0948	-0.0081	-0.0163
Chloroflexi_Dehalococcoidia_661239_uncultured bacterium	0.1112.	-0.0419	0.1469*	-0.1292*	0.1748**	0.0609	-0.1693**	-0.0095	-0.0736	-0.059	0.081	0.1429*
Chloroflexi_Dehalococcoidia_661239_uncultured Dehalococcoides sp.	0.0283	0.0058	0.0413	-0.0029	-0.029	-0.0459	-0.0047	-0.0064	-0.0264	0.0294	0.0498	0.0431
Chloroflexi_Dehalococcoidia_Dehalococcoidales_Dehalococcoidaceae	0.0586	-0.016	-0.008	0.0221	0.0731	0.0945	-0.0772	0.0575	-0.0134	0.0153	-0.0498	-0.0802
Chloroflexi_Dehalococcoidia_Dehalococcoidales_uncultured	0.0933	0.022	0.0215	0.1684**	0.004	-0.0214	0.036	0.0465	0.018	-0.0512	0.0557	0.0558
Chloroflexi_Dehalococcoidia_DscP2_uncultured eubacterium H1.4.f	0.0718	0.0847	0.1087.	-0.0499	0.0977	0.033	0.0022	-0.0667	-0.1107.	0.0667	0.1087.	0.0821
Chloroflexi_Dehalococcoidia_ER-E4-17_uncultured bacterium	0.0221	0.0013	0.0195	0.0247	-0.0534	-0.0482	-0.0326	-0.0589	0.0612	-0.0664	0.0898	0.0795
Chloroflexi_Dehalococcoidia_FW22_NA	0.067	0.0181	0.0601	0.0355	-0.0037	-0.0696	-0.0599	-0.0441	0.0365	-0.0549	0.1164.	0.1338*
Chloroflexi_Dehalococcoidia_FW22_uncultured bacterium	0.0182	-0.0194	0.0218	0.0997	-0.0122	-0.0013	-0.0811	-0.0986	0.063	-0.0719	0.0215	0.0061
Chloroflexi_Dehalococcoidia_FW22_uncultured Chloroflexi bacterium	0.0706	0.0262	0.0673	0.044	0.0315	0.0226	0.0765	-0.0242	-0.0488	0.0121	0.0978	0.0967
Chloroflexi_Dehalococcoidia_FW22_uncultured Dehalogenimonas sp.	-0.0732	-0.0498	-0.0676	0.0365	-0.0601	-0.1231.	0.0212	-0.0526	0.0687	-0.026	-0.0275	-0.0025
Chloroflexi_Dehalococcoidia_GIF3_Dehalococcoidia bacterium SCGC AB-540-C11	0.0676	0.0505	-0.0117	0.236***	-0.0472	-0.0634	0.1078.	0.0647	-0.0263	0.089	0.008	0.0267
Chloroflexi_Dehalococcoidia_GIF3_NA	0.044	0.055	0.1143.	-0.0722	0.0458	0.0182	-0.083	-0.1068.	-0.0996	0.0612	0.0883	0.0663
Chloroflexi_Dehalococcoidia_GIF3_uncultured bacterium	-0.0017	0.0808	0.017	-0.0434	-0.0707	-0.1204.	0.0236	-0.1495*	-0.051	0.0894	0.0778	0.0722
Chloroflexi_Dehalococcoidia_GIF3_uncultured Chlorobi bacterium	0.1163.	0.1988**	0.1915**	-0.0637	0.1723**	0.0483	-0.0773	-0.1355*	-0.1883**	0.1411*	0.1018	0.0867
Chloroflexi_Dehalococcoidia_GIF3_uncultured eubacterium t0.8.f	0.0221	0.0013	0.0195	0.0247	-0.0534	-0.0482	-0.0326	-0.0589	0.0612	-0.0664	0.0898	0.0795
Chloroflexi_Dehalococcoidia_GIF9_NA	0.0594	0.0752	0.1065.	-0.0288	0.1064.	0.0501	-0.1088.	-0.0208	-0.0737	0.0182	0.0204	0.0201
Chloroflexi_Dehalococcoidia_GIF9_uncultured bacterium	-0.0715	-0.0294	0.0335	0.0089	0.0389	-0.0868	-0.0169	-0.1282*	-0.0015	0.0222	-0.0509	-0.0563
Chloroflexi_Dehalococcoidia_GIF9_uncultured Chloroflexi bacterium	0.0863	0.0739	0.0567	0.0841	0.0553	0.0027	-0.0104	5e-04	-0.0164	0.0244	0.0607	0.0801
Chloroflexi_Dehalococcoidia_GIF9_uncultured soil bacterium	0.1045.	0.204**	0.0864	0.0264	5e-04	-0.0573	0.1202.	-0.1464*	-0.1682**	0.2093***	0.1721**	0.1492*
Chloroflexi_Dehalococcoidia_JdFR-54_Dehalococcoides sp. JdFR-54	0.1384*	0.0941	0.1052.	0.0793	0.1495*	0.0092	-0.1384*	0.0575	-0.0941	0.1052.	-0.0387	0.0055
Chloroflexi_Dehalococcoidia_JdFR-54_uncultured bacterium	-0.1217.	-0.1439*	-0.1375*	-0.1439*	-0.0941	0.0534	-0.0129	0.0698	0.1439*	-0.1458*	-0.1293*	-0.1375*
Chloroflexi_Dehalococcoidia_MSBL5_NA	0.0991	0.0336	0.0738	0.0291	0.0557	-0.0047	-0.0023	-0.0053	-0.0433	0.0117	0.1	0.1087.
Chloroflexi_Dehalococcoidia_MSBL5_uncultured bacterium	0.1067.	0.1253*	0.1393*	0.0456	0.1167.	0.0494	-0.0615	-0.0104	-0.1356*	0.0893	0.0655	0.0397
Chloroflexi_Dehalococcoidia_MSBL5_uncultured Chloroflexi bacterium	0.0318	0.063	0.1319*	-0.1371*	0.0307	-0.0307	-0.0073	-0.1365*	-0.1177.	0.0734	0.1111.	0.0912
Chloroflexi_Dehalococcoidia_NA_NA	0.2669***	0.272***	0.302***	-0.0184	0.1399*	0.0207	-0.09	-0.1881**	-0.2407***	0.1604*	0.3043***	0.2963***
Chloroflexi_Dehalococcoidia_RBG-13-46-9_Chloroflexi bacterium RBG_13_46_9	0.1247*	0.0969	0.1178.	0.0593	0.1139.	-0.008	-0.1507*	-0.0063	-0.0575	0.0589	0.0236	0.0538
Chloroflexi_Dehalococcoidia_RBG-13-46-9_uncultured bacterium	0.2562***	0.1349*	0.2159***	0.1761**	0.2361***	0.0446	-0.1561*	-0.117.	-0.0367	-0.1248*	0.2884***	0.3023***
Chloroflexi_Dehalococcoidia_S085_marine sediment metagenome	0.0446	0.1005	0.0603	-0.0081	0.0314	-0.0129	-0.0025	-0.0978	-0.0553	0.0223	0.1065.	0.0865
Chloroflexi_Dehalococcoidia_S085_metagenome	0.1062.	0.0541	0.1165.	0.0233	0.0493	-0.004	-0.0096	-0.0417	-0.0916	0.096	0.1013	0.1191.
Chloroflexi_Dehalococcoidia_S085_NA	-0.2167***	-0.3339***	-0.28***	-0.171**	-0.0569	0.0707	-0.1046.	0.162*	0.2943***	-0.2778***	-0.2054**	-0.1598*
Chloroflexi_Dehalococcoidia_S085_uncultured bacterium	-0.157*	-0.142*	-0.4454***	-0.0804	-0.3828***	-0.3656***	0.4651***	0.202**	0.1215.	0.2287***	-0.1735**	-0.1597*
Chloroflexi_Dehalococcoidia_S085_uncultured bacterium 5G4	-0.0166	0.0158	0.0322	-0.0899	-0.0505	-0.2077***	0.1103.	-0.1728**	-0.0481	0.0513	0.191**	0.2028**
Chloroflexi_Dehalococcoidia_S085_uncultured Chloroflexi bacterium	0.1007	0.1115.	0.157*	0.0063	0.0721	0.0586	-0.0677	-0.0995	-0.1001	0.0346	0.1396*	0.1085.
Chloroflexi_Dehalococcoidia_SAR202 clade_hydrothermal vent metagenome	0.0571	-0.0054	0.0132	-0.0077	0.0499	0.0422	0.0996	0.0201	-0.0776	0.1016	0.0242	0.0141
Chloroflexi_Dehalococcoidia_SAR202 clade_NA	-0.0772	-0.0171	-0.0608	-0.1038	-0.0269	-0.0136	0.075	-0.0304	0.0077	0.0186	0.0086	-0.0289
Chloroflexi_Dehalococcoidia_SAR202 clade_uncultured bacterium	0.1689**	0.1635**	0.1455*	0.0147	0.1383*	0.1317*	0.035	-0.0764	-0.1862**	0.1554*	0.1299*	0.0871
Chloroflexi_Dehalococcoidia_SAR202 clade_uncultured eubacterium H1.2.f	0.0503	-0.0353	-0.0616	0.1027	-0.0192	-0.0271	0.0241	0.0861	0.0541	-0.0127	-0.0386	-0.0296
Chloroflexi_Dehalococcoidia_Sh765B-AG-111_uncultured Chlorobi bacterium	0.055	-0.0133	0.0329	0.0052	0.0624	-0.0019	-0.0606	0.1059.	-0.0126	0.0107	-0.0925	-0.0649
Chloroflexi_Dehalococcoidia_Sh765B-TzT-20_NA	0.0628	0.0521	0.0609	-0.0328	0.0863	0.1227.	-0.0329	-0.0356	-0.0687	0.0129	0.0489	0.0102
Chloroflexi_Dehalococcoidia_Sh765B-TzT-20_uncultured bacterium	-1e-04	-0.0324	0.0023	0.0241	-0.0131	0.0279	-0.057	0.0768	-0.0155	0.0227	-0.084	-0.0647
Chloroflexi_Dehalococcoidia_Sh765B-TzT-20_uncultured Chlorobi bacterium	0.0252	0.0393	0.012	0.0423	-0.0954	-0.0442	0.0405	-0.0728	0.0406	-0.046	0.1036	0.0761
Chloroflexi_Dehalococcoidia_SPG12-343-353-B75_uncultured bacterium	-0.0851	-0.0833	-0.0216	-0.1329*	-0.0684	0.0058	-0.0497	-0.0582	0.0281	-0.0079	-0.039	-0.0446
Chloroflexi_Dehalococcoidia_t0.6.f_NA	0.0314	0.0018	0.0277	0.0351	-0.0756	-0.0683	-0.0461	-0.0835	0.0867	-0.0941	0.1273*	0.1126.
Chloroflexi_Dehalococcoidia_t0.6.f_uncultured eubacterium t0.6.f	0.0718	0.0847	0.1087.	-0.0499	0.0977	0.033	0.0022	-0.0667	-0.1107.	0.0667	0.1087.	0.0821
Chloroflexi_Dehalococcoidia_vadinBA26_NA	-0.0319	0.0532	-0.0548	0.04	-0.1189.	-0.1158.	0.1725**	-0.032	0.0079	0.0407	0.0986	0.0801
Chloroflexi_Dehalococcoidia_vadinBA26_uncultured bacterium	-0.0039	-0.0813	-0.0052	0.0354	-0.0059	0.0635	-0.0796	0.141*	0.0473	-0.0949	-0.0952	-0.0499
Chloroflexi_Dehalococcoidia_vadinBA26_uncultured Caldilineaceae bacterium	0.0498	0.0401	-0.0067	0.0473	0.003	-0.0516	0.0289	0.0062	0.0216	-0.0098	0.0948	0.0833
Chloroflexi_Gitt-GS-136_NA_NA	-0.1529*	-0.3561***	-0.3467***	0.0966	-0.2584***	0.0368	0.0918	0.5864***	0.2878***	-0.22***	-0.5129***	-0.4647***
Chloroflexi_Gitt-GS-136_uncultured bacterium_uncultured bacterium	0.0143	0.0221	0.0508	-0.0586	0.0456	-0.0195	0.0664	-0.0353	-0.0742	0.0977	0.0482	0.0495
Chloroflexi_Gitt-GS-136_uncultured Caldilinea sp._uncultured Caldilinea sp.	-0.0668	-0.099	-0.0184	-0.1238*	0.0887	0.2022**	-0.1608*	0.0463	0.0766	-0.1075.	-0.0249	-0.0246
Chloroflexi_Gitt-GS-136_uncultured Chloroflexi bacterium_uncultured Chloroflexi bacterium	0.1055.	0.0742	-0.0039	0.0977	0.056	0.1055.	0.0247	0.1034	-0.0508	0.1055.	-0.0534	-0.0821
Chloroflexi_JG30-KF-CM66_metagenome_metagenome	0.1686**	0.0551	0.0945	0.0529	0.086	0.2604***	0.0785	0.1678**	-0.1217.	0.0706	0.0059	-0.0737
Chloroflexi_JG30-KF-CM66_NA_NA	0.0232	0.0272	0.2386***	-0.1947**	0.4104***	0.4012***	-0.4968***	-0.0477	-0.1282*	-0.1291*	-0.1713**	-0.2479***
Chloroflexi_JG30-KF-CM66_uncultured Anaerolineales bacterium_uncultured Anaerolineales bacterium	0.0144	0.0396	-0.0063	0.0641	-0.1056.	-0.0713	0.08	0.0306	0.0158	0.0029	0.0366	0.0271
Chloroflexi_JG30-KF-CM66_uncultured Armatimonadetes bacterium_uncultured Armatimonadetes bacterium	-0.1959**	-0.0706	-0.3505***	-0.0084	-0.3609***	-0.3755***	0.3649***	0.0985	0.1503*	0.1149.	-0.0745	-0.0652
Chloroflexi_JG30-KF-CM66_uncultured bacterium_uncultured bacterium	0.184**	0.3078***	0.2509***	-0.0882	0.1498*	0.1812**	0.0296	-0.1904**	-0.3265***	0.2255***	0.194**	0.0959
Chloroflexi_JG30-KF-CM66_uncultured Caldilinea sp._uncultured Caldilinea sp.	-0.0952	0.1465*	-0.0712	-0.2095***	-0.1721**	-0.1654**	0.2283***	-0.2077***	-0.1712**	0.2803***	0.0732	0.0335
Chloroflexi_JG30-KF-CM66_uncultured soil bacterium_uncultured soil bacterium	0.2075***	0.1798**	0.143*	0.0938	0.1703**	0.1535*	0.0077	-0.0354	-0.2065***	0.1535*	0.0986	0.0537
Chloroflexi_KD4-96_bacterium Ellin6529_bacterium Ellin6529	0.0099	-0.041	0.055	-0.0171	-0.0416	-0.0215	-0.0339	-0.0052	-0.0171	0.0108	0.0298	0.0335
Chloroflexi_KD4-96_metagenome_metagenome	-0.0794	-0.275***	-0.1206.	0.0834	-0.0461	0.0072	-0.0883	0.288***	0.2186***	-0.2338***	-0.2562***	-0.1724**
Chloroflexi_KD4-96_NA_NA	-0.2343***	-0.0104	-0.1882**	-0.2108***	-0.2946***	-0.4213***	0.2149***	-0.1678**	0.0477	0.1133.	0.0519	0.0745
Chloroflexi_KD4-96_uncultured Anaerolineaceae bacterium_uncultured Anaerolineaceae bacterium	-0.0474	-0.0209	0.0445	-0.1895**	0.2055**	0.1651**	-0.2288***	-0.1061.	-0.0126	-0.0364	0.0448	0.0426
Chloroflexi_KD4-96_uncultured bacterium_uncultured bacterium	-0.1987**	-0.3212***	-0.4073***	-0.0535	-0.3877***	-0.1125.	0.2283***	0.3936***	0.3439***	-0.2058**	-0.2868***	-0.2014**
Chloroflexi_KD4-96_uncultured Chloroflexi bacterium_uncultured Chloroflexi bacterium	0.0381	0.0308	0.0872	0.1	0.1865**	0.1678**	-0.2502***	0.0306	0.0274	-0.1397*	-0.0786	-0.0787
Chloroflexi_KD4-96_uncultured Gram-positive bacterium_uncultured Gram-positive bacterium	0.0677	0.0733	0.0293	0.0811	-0.0199	0.0329	0.0233	0.0218	0.014	-1e-04	0.0636	0.0528
Chloroflexi_KD4-96_uncultured Levilinea sp._uncultured Levilinea sp.	0.043	0.0104	0.0091	0.0872	0.0013	-0.0326	0.0404	-0.0079	0.0299	-0.0534	0.0977	0.1055.
Chloroflexi_KD4-96_uncultured Longilinea sp._uncultured Longilinea sp.	0.0587	-0.0909	-6e-04	0.0754	-0.015	-0.0501	-0.0179	0.0025	0.0701	-0.0919	0.0862	0.1219.
Chloroflexi_KD4-96_uncultured prokaryote_uncultured prokaryote	-0.0049	-0.0839	-0.1166.	0.0674	-0.0971	0.0541	0.0324	0.1921**	0.1025	-0.0378	-0.1606*	-0.131*
Chloroflexi_Ktedonobacteria_B12-WMSP1_NA	-0.0976	0.0267	-0.0345	-0.135*	-0.1324*	-0.1157.	0.0739	-0.1594*	-0.0504	0.129*	0.0067	-0.007
Chloroflexi_Ktedonobacteria_B12-WMSP1_uncultured bacterium	0.0178	0.1491*	0.0995	-0.03	0.0278	-0.0782	0.1353*	-0.1772**	-0.1696**	0.1848**	0.1617*	0.1229.
Chloroflexi_Ktedonobacteria_B12-WMSP1_uncultured Chloroflexi bacterium	-0.103	0.1306*	-0.024	-0.1743**	-0.112.	-0.109.	0.1146.	-0.2065***	-0.122.	0.1875**	0.0472	0.0518
Chloroflexi_Ktedonobacteria_C0119_NA	-0.0153	-0.052	-0.1013	0.0476	-0.1135.	-0.0984	0.1177.	0.0911	0.0401	0.0162	-0.0226	-0.0301
Chloroflexi_Ktedonobacteria_C0119_uncultured bacterium	-0.2626***	-0.0805	-0.0515	-0.2422***	-0.2637***	-0.1941**	0.1982**	-0.1227.	-0.0504	0.136*	-0.021	-0.0227
Chloroflexi_Ktedonobacteria_C0119_uncultured candidate division SAM bacterium	-0.0196	0.0168	-0.0184	-0.028	0.0242	0.0637	-0.0278	-0.0167	-0.0116	0.0638	-0.0185	-0.0516
Chloroflexi_Ktedonobacteria_C0119_uncultured Chloroflexi bacterium	-0.2241***	-0.194**	-0.0906	-0.1324*	-0.2015**	-0.1781**	-0.0047	-0.0768	0.1636**	-0.1116.	-0.0253	-0.0283
Chloroflexi_Ktedonobacteria_C0119_uncultured soil bacterium	0.0398	0.0462	0.1336*	-0.1636**	0.0804	0.0667	-0.0153	-0.1091.	-0.1361*	0.0693	0.11.	0.1001
Chloroflexi_Ktedonobacteria_Ktedonobacterales_JG30-KF-AS9	0.1189.	0.1746**	0.3987***	-0.0926	0.3139***	0.1783**	-0.2988***	-0.3553***	-0.2974***	0.0782	0.1323*	0.0429
Chloroflexi_Ktedonobacteria_Ktedonobacterales_Ktedonobacteraceae	0.2174***	0.4653***	0.4518***	-0.1412*	0.2241***	-0.0869	0.1395*	-0.4369***	-0.6487***	0.5952***	0.3451***	0.264***
Chloroflexi_Ktedonobacteria_Ktedonobacterales_uncultured bacterium	0.3163***	0.3787***	0.6126***	-0.2029**	0.448***	0.2118***	-0.2057**	-0.3111***	-0.5726***	0.344***	0.2899***	0.2318***
Chloroflexi_Ktedonobacteria_MVP-21_uncultured bacterium	-0.0337	-0.0279	-0.0901	0.0807	-0.1319*	-0.1349*	0.1028	0.0019	0.0914	-0.0343	0.0434	0.0193
Chloroflexi_NA_NA_NA	0.005	0.0167	0.08	-0.1016	0.0357	0.0492	-0.0828	-0.064	-0.0619	0.052	0.0204	-0.0037
Chloroflexi_NLS2-31_uncultured bacterium_uncultured bacterium	0.0688	-0.0933	0.0656	0.0756	0.0609	0.1116.	-0.1971**	0.1383*	0.1091.	-0.2252***	0.0325	0.0774
Chloroflexi_OLB14_Chloroflexi bacterium OLB14_Chloroflexi bacterium OLB14	-0.1051.	-0.0979	-0.0647	-0.0078	0.0389	0.0041	-0.1329*	-0.0088	0.1163.	-0.1163.	-0.1273*	-0.1226.
Chloroflexi_OLB14_metagenome_metagenome	-0.0826	0.0496	-0.006	-0.0497	-0.0619	-0.1429*	0.0265	-0.1692**	-0.023	0.0507	0.0236	-0.0354
Chloroflexi_OLB14_NA_NA	0.1016	0.1204.	0.0669	0.0215	0.0841	-0.0793	-0.0652	-0.0662	-0.1262*	0.21***	0.0297	0.0711
Chloroflexi_OLB14_uncultured bacterium_uncultured bacterium	-0.154*	-0.2856***	-0.0292	-0.1509*	0.1438*	0.2852***	-0.3334***	0.1183.	0.225***	-0.3352***	-0.1532*	-0.1044.
Chloroflexi_OLB14_uncultured Chloroflexi bacterium_uncultured Chloroflexi bacterium	0.117.	8e-04	0.0329	0.1964**	0.0713	0.1515*	-0.0589	0.1723**	0.0058	-0.0551	-0.0688	-0.0654
Chloroflexi_P2-11E_uncultured bacterium_uncultured bacterium	0.0209	0.0644	0.0286	-0.0376	-0.0354	-0.021	0.0775	-0.053	-0.0181	-0.0493	0.1271*	0.0921
Chloroflexi_SHA-26_NA_NA	-0.0773	0.0231	0.0141	-0.0654	-0.0124	-0.0093	0.0046	-0.0879	-0.0909	0.1635**	-0.04	-0.0612
Chloroflexi_SHA-26_uncultured Anaerolineaceae bacterium_uncultured Anaerolineaceae bacterium	-0.0935	-0.0904	-0.0947	-0.0851	-0.0744	0.0738	-0.0218	0.0056	0.1181.	-0.1285*	-0.0401	-0.0127
Chloroflexi_SHA-26_uncultured bacterium_uncultured bacterium	-0.0647	0.0496	0.0679	-0.0651	-0.0263	-0.0602	-0.1215.	-0.2248***	-0.0171	0.0065	-0.0069	-0.0282
Chloroflexi_SHA-26_uncultured Chloroflexi bacterium_uncultured Chloroflexi bacterium	-0.0668	-0.0466	-0.0299	-0.0941	-0.1009	-0.0673	-0.0053	0.0756	0.0274	0.0176	-0.0759	-0.0303
Chloroflexi_SHA-26_uncultured Dehalococcoides sp._uncultured Dehalococcoides sp.	-0.0206	-0.0336	-0.0436	0.014	-0.1379*	-0.0625	0.0961	-0.0065	0.0313	0.0152	0.0569	0.0464
Chloroflexi_SHA-26_uncultured Dehalogenimonas sp._uncultured Dehalogenimonas sp.	0.1222.	-0.0114	0.0547	0.0689	0.069	0.0318	-0.0763	0.0732	0.0387	-0.1965**	0.1032	0.1379*
Chloroflexi_SHA-26_uncultured soil bacterium_uncultured soil bacterium	0.0337	-0.0386	-0.0014	0.0852	-0.0407	-0.0187	-0.0136	0.0594	0.0463	-0.0449	-0.0122	0.0161
Chloroflexi_TK10_bacterium Ellin6519_bacterium Ellin6519	0.0917	0.0704	0.1257*	-0.0574	0.0772	0.0097	-0.0226	-0.1143.	-0.1607*	0.1371*	0.1015	0.069
Chloroflexi_TK10_bacterium Ellin6543_bacterium Ellin6543	-0.1261*	0.0734	-0.0914	-0.0741	-0.1747**	-0.1501*	0.2095***	-0.0809	-0.0753	0.1714**	-0.1005	-0.1409*
Chloroflexi_TK10_Chloroflexi bacterium JEA33_Chloroflexi bacterium JEA33	0.0548	0.0083	0.0457	0.0182	0.0398	0.076	0.0091	-0.0618	-0.0708	0.0621	0.0186	-0.0279
Chloroflexi_TK10_Clostridiales bacterium PH28_bin88_Clostridiales bacterium PH28_bin88	0.0376	0.0032	0.0628	0.0215	0.0407	0.08	-0.1057.	0.0138	0.0016	-0.0247	-0.0106	-0.0431
Chloroflexi_TK10_NA_NA	0.1179.	0.009	0.1129.	-0.0392	-0.0269	-0.0371	0.0692	0.1471*	-0.1332*	0.157*	-0.0181	-0.0249
Chloroflexi_TK10_uncultured bacterium_uncultured bacterium	0.2101***	0.101	0.1354*	0.0333	0.0437	0.2473***	0.1492*	0.1839**	-0.2195***	0.1937**	0.019	-0.066
Chloroflexi_TK10_uncultured beta proteobacterium_uncultured beta proteobacterium	0.0534	0.0898	0.0898	0.0091	0.0768	0.0586	0.0039	-0.0589	-0.0924	0.0534	0.082	0.0586
Chloroflexi_TK10_uncultured Chloroflexi bacterium_uncultured Chloroflexi bacterium	0.2336***	0.1867**	0.2462***	0.0665	0.2291***	0.0685	-0.0556	-0.0317	-0.2946***	0.2598***	0.0265	0.0293
Chloroflexi_TK10_uncultured Chloroflexus sp._uncultured Chloroflexus sp.	0.1405*	-0.127*	-0.0123	0.1996**	-0.0839	0.089	0.082	0.3487***	0.0182	-0.0068	-0.1099.	-0.0724
Chloroflexi_TK10_uncultured Dehalococcoidia bacterium_uncultured Dehalococcoidia bacterium	0.1193.	0.07	-0.005	0.0418	0.0263	0.0729	0.1539*	0.0191	-0.2081***	0.3439***	-0.0261	-0.0818
Chloroflexi_TK10_uncultured soil bacterium_uncultured soil bacterium	-0.0467	-0.0458	-0.0611	-0.1025	-0.0902	-0.0287	0.1261*	0.0036	-0.0088	0.0332	-0.0111	-0.0594
CK-2C2-2_uncultured organism_uncultured organism_uncultured organism	-0.0508	-0.0729	-0.0508	-0.043	0.0378	0.0977	-0.0898	0.0406	0.082	-0.0833	-0.043	-0.0534
Cloacimonetes_Cloacimonadia_Cloacimonadales_PBS-18	0.1333*	0.1556*	0.1399*	0.1311*	-0.0304	-0.0598	0.0859	-0.2102***	-0.0049	-0.1028	0.3793***	0.4084***
Cloacimonetes_Cloacimonadia_Cloacimonadales_uncultured soil bacterium PBS-21	0.0084	0.0779	0.0779	0.0781	-0.0154	-0.0355	-0.0071	-0.0922	-0.0073	-0.0153	0.1305*	0.1258*
Cyanobacteria_Melainabacteria_Gastranaerophilales_Blattella germanica (German cockroach)	-0.0193	0.015	0.0172	9e-04	-0.0784	-0.023	0.0752	-0.006	-0.0024	0.0175	0.058	0.0673
Cyanobacteria_Melainabacteria_Gastranaerophilales_Candidatus Melainabacteria bacterium GWA2_34_9	0.0231	-0.0157	-0.0075	0.1138.	-0.0339	-0.0246	-0.0106	-0.0719	0.085	-0.0734	0.015	-0.0212
Cyanobacteria_Melainabacteria_Gastranaerophilales_Candidatus Melainabacteria bacterium RIFOXYA2_FULL_32_9	0.0216	0.0067	-0.0127	0.0874	-0.0153	-0.0413	0.0387	0.0054	0.0314	-0.0096	0.0599	0.0387
Cyanobacteria_Melainabacteria_Gastranaerophilales_NA	-0.0303	0.0026	0.0069	0.0972	-0.0229	0.1438*	-0.0325	0.0346	0.0788	-0.1117.	-0.0562	-0.1101.
Cyanobacteria_Melainabacteria_Gastranaerophilales_rumen bacterium YS2	0.0768	0.043	0.043	0.1055.	0.0169	0.0872	0.056	0.0641	-0.0273	-0.0247	0.0299	0.0117
Cyanobacteria_Melainabacteria_Gastranaerophilales_uncultured bacterium	0.0768	0.043	0.043	0.1055.	0.0169	0.0872	0.056	0.0641	-0.0273	-0.0247	0.0299	0.0117
Cyanobacteria_Melainabacteria_Gastranaerophilales_uncultured Gloeobacter sp.	0.0785	0.0375	0.0518	0.1059.	0.0299	0.0742	-0.036	0.0339	-0.0125	0.0133	-0.0123	-0.0169
Cyanobacteria_Melainabacteria_Gastranaerophilales_uncultured Merismopedia sp.	0.0087	0.012	0.0159	0.0464	0.0101	0.1068.	0.0083	0.0565	0.0398	-0.086	0.0353	0.0306
Cyanobacteria_Melainabacteria_Gastranaerophilales_uncultured organism	0.0054	-0.0657	0.0331	-0.0092	-0.0213	0.0736	-0.0631	0.0501	0.0378	-0.0767	0.0031	-0.0076
Cyanobacteria_Melainabacteria_Gastranaerophilales_uncultured prokaryote	0.0373	0.0439	0.0519	0.0267	0.0606	0.0166	-0.0479	-0.0048	-0.0465	0.0511	-0.0165	-0.0228
Cyanobacteria_Melainabacteria_Obscuribacterales_metagenome	-0.0862	0.0237	0.0037	0.0164	-0.0164	-0.1157.	0.0556	-0.1265*	-0.003	0.0344	-0.0324	-0.0436
Cyanobacteria_Melainabacteria_Obscuribacterales_NA	0.1055.	0.0742	-0.0039	0.0977	0.056	0.1055.	0.0247	0.1034	-0.0508	0.1055.	-0.0534	-0.0821
Cyanobacteria_Melainabacteria_Obscuribacterales_uncultured bacterium	-0.2882***	-0.0819	-0.2147***	-0.3081***	-0.3368***	-0.2584***	0.2274***	-0.2251***	0.0445	0.1607*	-0.0202	-0.0425
Cyanobacteria_Melainabacteria_Vampirovibrionales_metagenome	-0.0745	-0.0881	-0.0836	-0.071	0.0437	0.2071***	-0.1199.	0.0844	0.1621**	-0.1946**	-0.0336	-0.0565
Cyanobacteria_Melainabacteria_Vampirovibrionales_NA	-0.0079	-0.0134	0.0056	0.0967	-0.0627	-0.0857	0.0127	-0.0953	0.1059.	-0.1373*	0.1231.	0.1463*
Cyanobacteria_Melainabacteria_Vampirovibrionales_uncultured bacterium	0.0772	0.0227	0.0547	0.0672	0.0228	-0.0619	-0.0233	-0.0194	0.0217	-0.0492	0.1211.	0.1471*
Cyanobacteria_Melainabacteria_Vampirovibrionales_uncultured soil bacterium	-0.0311	-0.0649	-0.0531	-0.0971	-0.0627	0.02	0.0815	0.0533	-0.0082	0.0382	-0.0653	-0.0811
Cyanobacteria_Melainabacteria_Vampirovibrionales_Vampirovibrio chlorellavorus	-0.0378	-0.0117	-0.0794	0.0352	-0.0924	-0.1003	0.1029	0.0223	0.0404	0.0065	0.0039	-0.0091
Cyanobacteria_Oxyphotobacteria_Gloeobacterales_Gloeobacteraceae	-0.0846	-0.0508	-0.0169	0.0664	-0.0065	-0.0664	-0.082	-0.0916	0.0716	-0.0742	-0.0977	-0.1042.
Cyanobacteria_Oxyphotobacteria_Leptolyngbyales_Leptolyngbyaceae	-0.246***	-0.2778***	-0.2805***	-0.1778**	-0.0876	0.1538*	-0.1126.	0.1305*	0.3014***	-0.2833***	-0.1834**	-0.2401***
Cyanobacteria_Oxyphotobacteria_Limnotrichales_Limnotrichaceae	0.0299	0.0586	0.0664	-0.0195	0.069	0.0195	-0.0716	-0.0353	-0.043	0.0352	0.0117	0.0195
Cyanobacteria_Oxyphotobacteria_NA_NA	-0.0196	-0.0103	-0.0421	0.0095	-0.0364	0.0345	0.05	0.0639	0.0417	-0.0487	-0.0046	-0.0255
Cyanobacteria_Oxyphotobacteria_Nostocales_Chroococcidiopsaceae	0.1055.	0.0742	-0.0039	0.0977	0.056	0.1055.	0.0247	0.1034	-0.0508	0.1055.	-0.0534	-0.0821
Cyanobacteria_Oxyphotobacteria_Nostocales_Coleofasciculaceae	-0.1248*	-0.0593	-0.0869	-0.1511*	-0.1308*	-0.0166	0.0426	-0.0498	0.0546	-0.0201	-0.0191	-0.0696
Cyanobacteria_Oxyphotobacteria_Nostocales_Cyanobacteriaceae	0.0097	0.0114	0.0408	0.0867	0.0704	-0.0422	-0.1274*	-0.0358	0.0033	4e-04	-0.0884	-0.0708
Cyanobacteria_Oxyphotobacteria_Nostocales_Microcystaceae	-0.2864***	-0.1879**	-0.246***	-0.2487***	-0.1741**	0.0327	-0.0813	0.0732	0.2382***	-0.1622**	-0.2193***	-0.2461***
Cyanobacteria_Oxyphotobacteria_Nostocales_NA	-0.061	-0.0425	-0.0272	-0.0328	-0.0943	-0.1054.	0.0299	-0.019	-0.0089	0.0773	-0.0131	0.0091
Cyanobacteria_Oxyphotobacteria_Nostocales_Nostocaceae	0.0472	-0.0068	-0.0347	0.1963**	-0.0263	0.0617	-0.0318	0.105.	0.1164.	-0.0851	-0.1032	-0.1463*
Cyanobacteria_Oxyphotobacteria_Nostocales_Nostocales Incertae Sedis	-0.1402*	-0.1421*	-0.1337*	-0.1421*	-0.1015	-0.0181	-0.0277	0.001	0.1421*	-0.1384*	-0.1125.	-0.109.
Cyanobacteria_Oxyphotobacteria_Nostocales_Phormidiaceae	0.0923	0.0018	-0.0308	0.0448	0.0441	0.1451*	0.001	0.1477*	-0.0252	0.0695	-0.1073.	-0.13*
Cyanobacteria_Oxyphotobacteria_Oxyphotobacteria Incertae Sedis_Unknown Family	-0.2963***	-0.3746***	-0.2882***	-0.2208***	-0.2033**	0.0574	-0.1162.	0.2381***	0.3158***	-0.2457***	-0.3767***	-0.3915***
Cyanobacteria_Oxyphotobacteria_Phormidesmiales_Nodosilineaceae	0.0184	-0.0128	-0.0266	0.0237	-9e-04	0.04	-0.0291	0.0767	0.031	-0.029	-0.0698	-0.0698
Cyanobacteria_Oxyphotobacteria_Pseudanabaenales_Pseudanabaenaceae	-0.1428*	-0.0648	-0.1012	-0.0657	-0.0898	-0.0605	-0.0118	-0.0523	0.1098.	-0.0784	-0.1202.	-0.1331*
Cyanobacteria_Oxyphotobacteria_SepB-3_NA	-0.0951	-0.0977	-0.0885	-0.0977	-0.069	0.0482	-0.0169	0.0092	0.0977	-0.1003	-0.0742	-0.0899
Cyanobacteria_Oxyphotobacteria_Synechococcales_Cyanobiaceae	0.0836	0.0762	0.1919**	0.0417	0.0485	0.0563	-0.1491*	0.0036	-0.08	0.0157	0.0414	0.0484
Cyanobacteria_Oxyphotobacteria_Synechococcales_Synechococcaceae	-0.268***	-0.338***	-0.2395***	-0.2913***	-0.1554*	0.1103.	-0.1736**	0.2094***	0.2954***	-0.3134***	-0.2882***	-0.3127***
Cyanobacteria_Oxyphotobacteria_Thermosynechococcales_Thermosynechococcaceae	-0.1023	-0.1184.	-0.0957	-0.0913	-0.1293*	-0.0059	0.021	0.0695	0.0947	-0.061	-0.0858	-0.0955
Cyanobacteria_Sericytochromatia_Cyanobacteria/Melainabacteria group bacterium S15B-MN24 CBMW_12_Cyanobacteria/Melainabacteria group bacterium S15B-MN24 CBMW_12	-0.1425*	-0.0636	-0.1448*	-0.1169.	-0.1609*	-0.0723	0.0994	-0.0354	0.0863	-0.0121	-0.0502	-0.0639
Cyanobacteria_Sericytochromatia_Hyaloperonospora arabidopsidis_Hyaloperonospora arabidopsidis	-0.0247	-0.0195	0.0586	-0.0898	-0.0273	-0.0404	-0.0534	-0.0916	-0.0586	0.0898	0.0195	0.0274
Cyanobacteria_Sericytochromatia_metagenome_metagenome	0.0144	0.0084	-0.0645	0.084	0.0063	0.0945	0.0134	0.0788	0.0599	-0.0276	-0.0823	-0.1186.
Cyanobacteria_Sericytochromatia_NA_NA	-0.0619	-0.0717	-0.0321	-0.0915	-0.0826	0	0.116.	0.0147	-0.0096	0.0898	-0.0154	-0.0586
Cyanobacteria_Sericytochromatia_uncultured Bacillales bacterium_uncultured Bacillales bacterium	0.0866	-0.0084	3e-04	0.0986	-0.035	0.0077	0.0214	0.0174	0.0456	-0.0489	0.0502	0.0483
Cyanobacteria_Sericytochromatia_uncultured bacterium_uncultured bacterium	-0.3315***	-0.2224***	-0.2834***	-0.2708***	-0.3454***	-0.2197***	0.1889**	-0.1354*	0.1529*	0.0745	-0.1191.	-0.1504*
Cyanobacteria_Sericytochromatia_uncultured cyanobacterium_uncultured cyanobacterium	0.0488	0.0949	0.0481	-0.023	0.0203	-0.0396	0.015	-0.1009	-0.1274*	0.1743**	0.0214	0.0341
Cyanobacteria_Sericytochromatia_uncultured Halanaerobiaceae bacterium_uncultured Halanaerobiaceae bacterium	-0.1291*	-0.0929	-0.1004	-0.1125.	-0.1095.	-0.0853	-0.0084	0.0483	0.1306*	-0.1412*	-0.0673	-0.0387
Cyanobacteria_Sericytochromatia_uncultured prokaryote_uncultured prokaryote	0.0768	0.043	0.043	0.1055.	0.0169	0.0872	0.056	0.0641	-0.0273	-0.0247	0.0299	0.0117
Cyanobacteria_Sericytochromatia_uncultured soil bacterium_uncultured soil bacterium	-0.1242*	-0.0682	-0.157*	-0.0485	-0.0325	0.0278	0.0196	0.0277	0.0991	0.0025	-0.1704**	-0.2124***
Cyanobacteria_Sericytochromatia_unidentified_unidentified	-0.1213.	-0.176**	-0.2531***	-0.1038	-0.1845**	-0.0019	0.0678	0.1445*	0.1656**	-0.0751	-0.1539*	-0.2017**
Dadabacteria_Dadabacteriia_Dadabacteriales_Candidatus Dadabacteria bacterium CSP1-2	0.131*	0.1163.	0.1255*	0.0312	0.1402*	0.0518	-0.1143.	-0.0133	-0.1052.	0.0496	0.0557	0.05
Dadabacteria_Dadabacteriia_Dadabacteriales_NA	0.0361	-0.0243	0.045	-0.0194	-0.017	0.0603	0.0253	0.1429*	-0.0277	0.0307	-0.0679	-0.0751
Dadabacteria_Dadabacteriia_Dadabacteriales_uncultured bacterium	0.1167.	0.071	0.2409***	-0.1516*	0.1143.	0.0382	-0.0684	-0.1218.	-0.2208***	0.1695**	0.1539*	0.1297*
Dadabacteria_Dadabacteriia_Dadabacteriales_uncultured soil bacterium	0.2132***	0.1275*	0.0972	0.0864	0.1669**	0.1138.	-0.0388	0.1281*	-0.1743**	0.2799***	-0.0673	-0.0667
Deinococcus-Thermus_Deinococci_Deinococcales_Deinococcaceae	0.123.	0.0029	0.0536	0.0389	0.0243	0.0072	0.0416	0.0034	-0.0694	0.0893	0.0911	0.0737
Deinococcus-Thermus_Deinococci_Deinococcales_Trueperaceae	-0.083	-0.0739	-0.08	0.058	-0.0824	-0.019	0.0253	0.0224	0.0948	-0.0912	-0.0909	-0.0996
Deinococcus-Thermus_Deinococci_Thermales_Thermaceae	0.0258	-0.0126	-0.0035	0.0256	0.0216	0.0132	-0.0433	0.0244	0.0358	-0.0463	-0.0031	0.0104
Dependentiae_Babeliae_Babeliales_Babeliaceae	-0.0285	0.0632	0.0726	0.0089	0.0315	0.0204	0.0079	-0.1181.	-0.0545	0.0655	0.0538	0.0399
Dependentiae_Babeliae_Babeliales_candidate division TM6 bacterium GW2011_GWF2_37_49	0.1439*	0.0997	0.0496	0.109.	0.1143.	0.0796	-0.0513	0.1022	-0.083	0.1274*	-0.0573	-0.0556
Dependentiae_Babeliae_Babeliales_metagenome	0.03	-0.0107	0.0206	0.015	0.0318	-0.0588	-0.0465	-0.0358	0.007	0.0096	0.0109	0.0377
Dependentiae_Babeliae_Babeliales_NA	0.1836**	0.1512*	-0.0032	0.2954***	0.0618	0.0326	0.1006	0.1093.	-0.0694	0.1518*	-0.0126	-0.0531
Dependentiae_Babeliae_Babeliales_UBA12409	-0.0798	-0.0364	-0.1286*	0.1283*	-0.0823	-0.0552	0.083	0.029	0.0929	-0.0127	-0.0815	-0.121.
Dependentiae_Babeliae_Babeliales_UBA12411	0.1217.	0.0311	-0.0259	0.1032	0.0571	0.1309*	0.0703	0.1186.	-0.0608	0.1068.	-0.0479	-0.0792
Dependentiae_Babeliae_Babeliales_uncultured bacterium	0.0882	0.035	0.0048	0.1521*	0.0826	0.0577	-0.0788	0.0265	-0.0091	0.0479	-0.1002	-0.1123.
Dependentiae_Babeliae_Babeliales_uncultured Candidatus Dependentiae bacterium	-0.1703**	-0.1022	-0.0341	0.1336*	-0.0131	-0.1336*	-0.165**	-0.1844**	0.1441*	-0.1493*	-0.1965**	-0.2096***
Dependentiae_Babeliae_Babeliales_uncultured organism	0.0177	-0.0215	-0.0911	0.1038	-0.0791	-0.0765	0.1607*	0.0506	0.0378	0.0023	0.0464	0.0295
Dependentiae_Babeliae_Babeliales_uncultured prokaryote	0.1291*	0.0829	0.0278	0.1439*	0.0516	0.1365*	0.0573	0.1186.	-0.0553	0.0568	-0.0164	-0.0496
Dependentiae_Babeliae_Babeliales_Vermiphilaceae	0.0251	0.0908	0.0544	-0.1529*	0.095	0.0417	-0.0369	-0.0719	-0.1545*	0.2754***	-0.0415	-0.0605
Elusimicrobia_Elusimicrobia_FCPU453_uncultured bacterium	-0.098	-0.007	-0.1872**	-0.0081	-0.2003**	-0.1728**	0.2604***	-0.0834	0.0265	0.0887	-0.0135	-0.0679
Elusimicrobia_Elusimicrobia_FCPU453_uncultured Termite group 1 bacterium	-0.0112	-0.0074	-0.0427	0.0425	-0.1034	-0.1053.	0.0502	-0.0257	0.0719	-0.0422	0.0662	0.0496
Elusimicrobia_Elusimicrobia_Lineage IV_Elusimicrobia bacterium GWA2_69_24	0.0298	-0.0351	0.0182	-0.0291	-0.0017	0.028	0.0151	-0.019	-0.0664	0.0958	0.0036	-0.002
Elusimicrobia_Elusimicrobia_Lineage IV_Elusimicrobia bacterium RIFCSPHIGHO2_02_FULL_61_10	-0.0426	0.0794	0.0015	-0.0139	-0.0417	-0.0862	0.0215	-0.1757**	-0.019	0.0047	0.0674	0.0256
Elusimicrobia_Elusimicrobia_Lineage IV_Elusimicrobia bacterium RIFOXYD12_FULL_66_9	0.0074	-0.0285	0.0247	-0.0558	0.0662	-0.0019	-0.1625**	0.0103	-0.0024	0.0263	-0.0737	-0.0373
Elusimicrobia_Elusimicrobia_Lineage IV_NA	0.0687	0.0299	0.0296	0.0238	0.0536	0.1011	0.0284	0.0245	-0.095	0.1268*	-0.0194	-0.0478
Elusimicrobia_Elusimicrobia_Lineage IV_uncultured bacterium	-0.112.	0.0082	-0.1683**	-0.0419	-0.1941**	-0.151*	0.2299***	-0.0689	0.024	0.1028	0.011	-0.0226
Elusimicrobia_Elusimicrobia_Lineage IV_uncultured Elusimicrobia bacterium	-0.0075	-0.0051	-0.0058	-0.0077	4e-04	-0.0266	0.0019	0.0187	0.0268	-0.0629	0.0421	0.0376
Elusimicrobia_Elusimicrobia_Lineage IV_uncultured soil bacterium	-0.1158.	-0.0893	-0.0318	-0.0719	-0.1264*	-0.167**	-0.022	-0.0609	0.02	0.0418	-0.0742	-0.0817
Elusimicrobia_Elusimicrobia_Lineage IV_uncultured Termite group 1 bacterium	-0.572***	-0.3739***	-0.548***	-0.1876**	-0.482***	-0.4069***	0.1578*	0.0127	0.4567***	-0.2225***	-0.3851***	-0.3467***
Elusimicrobia_Elusimicrobia_MD2894-B20_uncultured bacterium	0.0757	0.1076.	0.1373*	0.029	0.1126.	0.1034	-0.1696**	-0.0457	-0.024	-0.0636	0.04	0.0075
Elusimicrobia_Elusimicrobia_MVP-88_metagenome	0.1055.	0.0742	-0.0039	0.0977	0.056	0.1055.	0.0247	0.1034	-0.0508	0.1055.	-0.0534	-0.0821
Elusimicrobia_Elusimicrobia_MVP-88_NA	-0.0567	-0.1526*	-0.1365*	-0.0531	0.0597	0.1432*	-0.0876	0.1662**	0.1185.	-0.0963	-0.1341*	-0.1446*
Elusimicrobia_Elusimicrobia_MVP-88_uncultured bacterium	-0.0525	-0.019	-0.0648	-0.0697	-0.0195	0.0936	-0.0086	-0.0399	0.0475	0.0139	-0.0198	-0.0812
Elusimicrobia_Elusimicrobia_MVP-88_uncultured deep-sea bacterium	-0.0213	0.0521	0.0217	-0.1334*	0.0045	-0.0115	0.0156	-0.0667	-0.0851	0.1241*	-0.013	-0.0333
Elusimicrobia_Elusimicrobia_MVP-88_uncultured delta proteobacterium	0.1531*	0.0418	0.0413	0.1251*	0.0723	0.1253*	0.0809	0.0557	-0.0672	0.0032	0.0934	0.0571
Elusimicrobia_Elusimicrobia_MVP-88_uncultured Termite group 1 bacterium	0.1366*	0.1217.	0.0698	0.0612	0.1051.	0.1219.	-0.0274	0.032	-0.094	0.0723	0.0365	-0.0115
Elusimicrobia_Elusimicrobia_NA_NA	0.1171.	0.0792	0.0382	0.0878	0.0642	-0.0298	-0.0078	-0.0032	-0.0607	0.0506	0.0565	0.0851
Elusimicrobia_Endomicrobia_Endomicrobiales_Endomicrobiaceae	0.1432*	0.3004***	0.1826**	0.1736**	0.1284*	0.082	0.0317	-0.1589*	-0.1769**	0.1163.	0.201**	0.115.
Elusimicrobia_Lineage IIa_actinobacterium YJF1-30_actinobacterium YJF1-30	0.0322	0.0376	0.0388	-0.033	0.0458	-0.0014	0.0168	-0.0153	-0.0391	0.06	0.0382	0.0393
Elusimicrobia_Lineage IIa_bacterium LWH54_bacterium LWH54	-0.0456	-0.0794	-0.0404	-0.0013	-0.0326	-0.0247	-0.0247	0.0641	0.0534	-0.0482	-0.0898	-0.0534
Elusimicrobia_Lineage IIa_metagenome_metagenome	0.0709	0.0546	-0.0197	0.0698	0.03	0.0109	0.0152	0.0963	-0.0288	0.1107.	-0.052	-0.0461
Elusimicrobia_Lineage IIa_NA_NA	-0.218***	-0.1025	-0.1224.	-0.1547*	-0.1365*	-0.1305*	-0.0169	-0.1405*	0.0595	0.0079	-0.0991	-0.1068.
Elusimicrobia_Lineage IIa_uncultured actinobacterium_uncultured actinobacterium	0.1022	0.0446	0.0827	0.117.	0.0749	0.0919	-0.1033	0.0113	-0.0385	5e-04	-0.0057	-0.0401
Elusimicrobia_Lineage IIa_uncultured bacterium_uncultured bacterium	-0.0808	-0.0852	-0.0815	-0.113.	-0.0137	-0.0777	0.0031	0.0118	0.0589	0.0025	-0.0232	0.0186
Elusimicrobia_Lineage IIa_uncultured Elusimicrobia bacterium_uncultured Elusimicrobia bacterium	-0.1119.	-0.0285	-0.1286*	-0.0816	-0.1547*	-0.1132.	0.1281*	-0.0391	0.0307	0.0831	-0.0335	-0.0688
Elusimicrobia_Lineage IIa_uncultured soil bacterium_uncultured soil bacterium	-0.068	0.0634	-0.1763**	-0.018	-0.1888**	-0.1068.	0.2782***	0.026	0.0195	0.1314*	-0.0168	-0.0384
Elusimicrobia_Lineage IIb_metagenome_metagenome	-0.0041	-0.0624	-0.0838	0.0078	0.0103	0.1036	-0.0196	0.0946	0.051	-0.0211	-0.0754	-0.1317*
Elusimicrobia_Lineage IIb_NA_NA	0.0404	0.1108.	0.0551	0.1169.	0.0705	-0.0338	0.0368	-0.0919	-0.0787	0.0796	0.0286	0.0093
Elusimicrobia_Lineage IIb_uncultured bacterium_uncultured bacterium	0.0147	0.0614	0.1398*	-0.1281*	0.1011	0.0625	-0.1011	-0.0875	-0.1206.	0.0546	0.0695	0.0678
Elusimicrobia_Lineage IIb_uncultured organism_uncultured organism	0.1211.	0.0232	0.034	0.1067.	0.0687	0.065	-0.0205	0.081	-0.0637	0.0936	-0.028	-0.0117
Elusimicrobia_Lineage IIb_uncultured soil bacterium_uncultured soil bacterium	-0.1338*	0.0015	-0.0794	-0.1402*	-0.1774**	-0.1354*	0.0977	-0.1238*	-0.0418	0.1683**	-0.0305	-0.0414
Elusimicrobia_Lineage IIb_uncultured Termite group 1 bacterium_uncultured Termite group 1 bacterium	0.0424	0.083	0.0941	-0.0277	0.0978	0.0277	-0.1015	-0.0501	-0.0609	0.0498	0.0166	0.0277
Elusimicrobia_Lineage IIc_Elusimicrobia bacterium RIFCSPHIGHO2_02_FULL_39_36_Elusimicrobia bacterium RIFCSPHIGHO2_02_FULL_39_36	0.0467	0.0872	0.0908	0.0779	0.0817	-0.0336	-0.1006	-0.0783	-0.0502	0.0212	0.0084	-0.0037
Elusimicrobia_Lineage IIc_Elusimicrobia bacterium RIFOXYA2_FULL_39_19_Elusimicrobia bacterium RIFOXYA2_FULL_39_19	-0.0223	0.0522	0.0045	0.0131	-0.0551	-0.0904	0.0803	-0.1271*	-0.0376	0.0659	0.0682	0.066
Elusimicrobia_Lineage IIc_NA_NA	0.1071.	0.0455	0.1092.	0.0769	0.1079.	0.032	-0.0564	0.004	-0.0791	0.0616	-0.016	-0.036
Elusimicrobia_Lineage IIc_uncultured bacterium_uncultured bacterium	-0.0893	9e-04	-0.0317	-0.0555	-0.0714	-0.1256*	0.0187	-0.162**	-0.011	0.0565	0.0348	0.0155
Elusimicrobia_Lineage IIc_uncultured prokaryote_uncultured prokaryote	0.1244*	0.1	0.0362	0.0798	0.0724	0.0955	0.063	0.0313	-0.1003	0.0933	0.0569	0.0028
Elusimicrobia_NA_NA_NA	-0.0495	0.0162	-0.0387	-0.0154	-0.0219	-0.0123	0.0138	-0.047	0.0144	-0.002	0.0281	0.0073
Elusimicrobia_Rs-M47_uncultured bacterium_uncultured bacterium	-0.0117	0.0508	0.0352	0.0169	-0.0378	-0.0013	0.0482	-0.0079	0.0143	-0.0404	0.0742	0.0951
Elusimicrobia_Rs-M47_uncultured delta proteobacterium_uncultured delta proteobacterium	-0.0326	-0.056	-0.043	-0.0508	-0.0586	-0.0273	0.0143	-0.0589	0.0508	-0.0456	0.0352	0.0716
Elusimicrobia_Rs-M47_uncultured organism_uncultured organism	-0.0117	0.0508	0.0352	0.0169	-0.0378	-0.0013	0.0482	-0.0079	0.0143	-0.0404	0.0742	0.0951
Elusimicrobia_uncultured bacterium_uncultured bacterium_uncultured bacterium	0.0299	0.0586	0.0664	-0.0195	0.069	0.0195	-0.0716	-0.0353	-0.043	0.0352	0.0117	0.0195
Entotheonellaeota_Entotheonellia_Entotheonellales_Entotheonellaceae	-0.0868	-0.1062.	-0.0313	-0.1128.	-0.0672	6e-04	-0.0462	0.003	0.0351	-0.0228	-0.0833	-0.0743
Epsilonbacteraeota_Campylobacteria_Campylobacterales_Sulfurospirillaceae	0.0516	0.049	0.0537	0.0477	0.05	-0.0091	-0.0225	-0.0307	-0.0094	-0.0127	0.0773	0.0884
Epsilonbacteraeota_Campylobacteria_Campylobacterales_Thiovulaceae	0.1393*	0.1594*	0.1936**	0.2259***	0.3131***	0.191**	-0.3447***	-0.0393	-0.0978	0.0878	-0.0731	-0.0813
Epsilonbacteraeota_Campylobacteria_Campylobacterales_uncultured	0.0741	0.0224	0.0537	0.0922	0.0796	0.0258	-0.1237*	0.0575	-0.0629	0.0703	-0.0755	-0.0257
FBP_metagenome_metagenome_metagenome	-0.0074	-0.0203	0.0198	-0.0455	-0.0154	0.013	-0.0286	-0.0153	0.0025	-0.0145	0.0257	-0.0015
FBP_NA_NA_NA	-0.1344*	-0.0625	-0.0992	-0.0369	-0.1441*	-0.1006	0.0741	-0.0333	0.0733	-0.0102	-0.0562	-0.0633
FBP_uncultured actinobacterium_uncultured actinobacterium_uncultured actinobacterium	0.1055.	0.0742	-0.0039	0.0977	0.056	0.1055.	0.0247	0.1034	-0.0508	0.1055.	-0.0534	-0.0821
FBP_uncultured bacterium_uncultured bacterium_uncultured bacterium	0.0768	0.043	0.043	0.1055.	0.0169	0.0872	0.056	0.0641	-0.0273	-0.0247	0.0299	0.0117
FBP_uncultured soil bacterium_uncultured soil bacterium_uncultured soil bacterium	-0.063	-0.0065	0.0706	-0.1853**	-0.0948	-0.1098.	-0.0579	-0.1864**	-0.0172	0.0504	0.118.	0.1178.
FCPU426_metagenome_metagenome_metagenome	-0.11.	-0.0875	0.0117	0.0167	0.0173	-0.0521	-0.1966**	-0.1552*	0.0305	0.0215	-0.1708**	-0.1785**
FCPU426_NA_NA_NA	-0.0022	0.0355	-0.016	-0.0113	0.0245	0.0724	0.0037	-0.0205	-0.033	0.0413	-0.0209	-0.0771
FCPU426_uncultured bacterium_uncultured bacterium_uncultured bacterium	-0.016	0.1197.	0.0798	0.0095	0.0364	-0.1073.	0.0035	-0.241***	-0.1417*	0.195**	0.0457	-0.0329
FCPU426_uncultured microorganism_uncultured microorganism_uncultured microorganism	0.1526*	0.1382*	0.1567*	0.1383*	0.1767**	0.0327	-0.0924	-0.0411	-0.1045.	0.0534	0.0723	0.084
FCPU426_uncultured Syntrophaceae bacterium_uncultured Syntrophaceae bacterium_uncultured Syntrophaceae bacterium	0.0423	0.0247	0.0712	-0.0155	-0.0013	0.0441	-0.0872	0.005	0.0085	-0.0623	0.0427	0.0335
Fibrobacteres_Chitinivibrionia_uncultured_NA	-0.0273	0.0736	-0.0227	-0.0429	-0.0603	-0.0893	0.1075.	-0.0742	-0.0434	0.0579	0.0312	0.0055
Fibrobacteres_Chitinivibrionia_uncultured_uncultured bacterium	0.1732**	0.2572***	0.0947	0.1024	0.1282*	0.0087	0.0092	0.0673	-0.1738**	0.2233***	0.0259	0.029
Fibrobacteres_Chitinivibrionia_uncultured_uncultured Caldithrix sp.	0.0063	0.1138.	0.062	4e-04	0.0557	-0.0133	0.093	-0.0868	-0.1317*	0.135*	0.0444	0.0277
Fibrobacteres_Fibrobacteria_Fibrobacterales_B122	-0.0514	-0.0437	-0.0411	0.0423	0.0563	0.0079	-0.1505*	-0.1569*	0.1054.	-0.106.	-1e-04	-0.0338
Fibrobacteres_Fibrobacteria_Fibrobacterales_B5-096	0.0917	0.079	0.0735	-0.0051	0.0464	-0.0306	-0.0121	-0.0794	-0.0929	0.1175.	0.0821	0.1038
Fibrobacteres_Fibrobacteria_Fibrobacterales_Candidatus Raymondbacteria	0.0079	0.0779	0.0631	0.0495	-0.0104	-0.086	0.0589	-0.1683**	-0.0565	0.0546	0.1264*	0.0781
Fibrobacteres_Fibrobacteria_Fibrobacterales_Fibrobacteraceae	0.0505	-0.0369	0.079	-0.0414	0.0157	0.0969	0.0145	0.046	-0.101	0.1481*	-0.0446	-0.0832
Fibrobacteres_Fibrobacteria_Fibrobacterales_MAT-CR-H6-H10	0.0908	0.1336*	0.1293*	0.0129	0.1219.	0.0305	-0.1197.	-0.0815	-0.1046.	0.0947	0.0301	0.0328
Fibrobacteres_Fibrobacteria_Fibrobacterales_NA	-0.0048	-0.0635	0.0164	0.0583	0.0094	0.0807	-0.1062.	0.035	0.0504	-0.0414	-0.1058.	-0.1142.
Fibrobacteres_Fibrobacteria_Fibrobacterales_possible family 01	-0.0339	-0.1272*	-0.0694	0.1149.	-0.0395	0.0903	-0.0704	0.1486*	0.1482*	-0.1166.	-0.1503*	-0.1556*
Firestonebacteria_Candidatus Firestonebacteria bacterium RIFOXYD2_FULL_39_29_Candidatus Firestonebacteria bacterium RIFOXYD2_FULL_39_29_Candidatus Firestonebacteria bacterium RIFOXYD2_FULL_39_29	0.0395	0.0635	0.014	0.0408	0.0033	-0.0614	0.0191	-0.0345	-0.0296	0.0511	0.038	0.0515
Firestonebacteria_NA_NA_NA	0.0221	0.0013	0.0195	0.0247	-0.0534	-0.0482	-0.0326	-0.0589	0.0612	-0.0664	0.0898	0.0795
Firestonebacteria_uncultured bacterium_uncultured bacterium_uncultured bacterium	0.0125	0.0957	0.1335*	-0.0952	0.0576	-0.0298	-0.1143.	-0.2411***	-0.0644	0.0271	0.1356*	0.0857
Firmicutes_Bacilli_Bacillales_Alicyclobacillaceae	-0.1271*	-0.1403*	-0.1828**	-0.1242*	-0.2594***	-0.059	0.17**	0.0947	0.1132.	-0.0126	-0.1143.	-0.1563*
Firmicutes_Bacilli_Bacillales_Bacillaceae	-0.1215.	-0.0976	-0.2542***	0.2249***	-0.2612***	-0.132*	0.2585***	0.0316	0.1782**	-0.0609	-0.1371*	-0.1813**
Firmicutes_Bacilli_Bacillales_NA	-0.1774**	-0.3124***	-0.0947	-0.1628**	-0.1259*	0.0115	-0.2946***	0.1645**	0.2698***	-0.3287***	-0.347***	-0.3325***
Firmicutes_Bacilli_Bacillales_Paenibacillaceae	-0.0637	-0.1209.	-0.2677***	0.1384*	-0.3351***	-0.0309	0.2971***	0.2281***	0.1907**	-0.0459	-0.1547*	-0.2237***
Firmicutes_Bacilli_Bacillales_Planococcaceae	0.0907	0.0641	0.0324	0.1	-0.006	0.1115.	0.1087.	0.0849	-0.0652	0.0257	0.0464	0.0203
Firmicutes_Bacilli_Bacillales_Sporolactobacillaceae	0.0768	0.043	0.043	0.1055.	0.0169	0.0872	0.056	0.0641	-0.0273	-0.0247	0.0299	0.0117
Firmicutes_Bacilli_Bacillales_Thermoactinomycetaceae	0.0906	0.0239	-0.1801**	0.3457***	-0.2566***	-0.1315*	0.4287***	0.2683***	0.06	0.0944	-0.0019	-0.0435
Firmicutes_Bacilli_Lactobacillales_Carnobacteriaceae	0.0874	-0.03	0.0313	0.0845	0.0554	0.2622***	-0.0572	0.2347***	-0.0031	-0.0371	-0.103	-0.1517*
Firmicutes_Bacilli_Lactobacillales_Leuconostocaceae	-0.0898	-0.0925	-0.0638	-0.0638	-0.0117	0.0117	-0.1029	0.0092	0.0872	-0.0833	-0.0482	-0.0534
Firmicutes_Bacilli_Lactobacillales_Streptococcaceae	0.0534	0.0898	0.0898	0.0091	0.0768	0.0586	0.0039	-0.0589	-0.0924	0.0534	0.082	0.0586
Firmicutes_Bacilli_NA_NA	-0.0089	-0.1067.	0.0259	-0.0204	-0.0432	0.1125.	-0.0492	0.138*	0.0061	-0.0216	-0.1467*	-0.1698**
Firmicutes_BRH-c20a_NA_NA	0.0221	0.0013	0.0195	0.0247	-0.0534	-0.0482	-0.0326	-0.0589	0.0612	-0.0664	0.0898	0.0795
Firmicutes_BRH-c20a_uncultured bacterium_uncultured bacterium	0.0013	-0.0226	-0.0106	-0.03	0.0253	0.0389	-0.081	0.0352	0.0226	-0.0189	-0.0721	-0.0612
Firmicutes_Clostridia_Clostridiales_Caldicoprobacteraceae	-0.021	0.0325	0.011	0.1004	-0.0162	-0.0406	0.0114	-0.0669	0.0296	-0.0369	-0.01	-0.0217
Firmicutes_Clostridia_Clostridiales_Christensenellaceae	-0.0214	-0.0249	0.0478	0.0926	-0.0421	-0.0493	-0.135*	-0.0971	0.1137.	-0.1232.	0.0304	0.0522
Firmicutes_Clostridia_Clostridiales_Clostridiaceae 1	-0.2172***	-0.146*	-0.2583***	0.0637	-0.2758***	-0.176**	0.0903	-0.0151	0.2648***	-0.2266***	-0.1661**	-0.2158***
Firmicutes_Clostridia_Clostridiales_Clostridiaceae 2	-0.0229	0.0179	0.0585	-0.0072	0.063	-0.0381	-0.0505	-0.0938	-0.0269	0.0345	-0.0214	-0.0198
Firmicutes_Clostridia_Clostridiales_Clostridiaceae 4	-0.0299	-0.0061	4e-04	-0.063	0.0051	0.0756	-0.0093	-0.0351	0.0042	-0.0336	0.0051	-0.0226
Firmicutes_Clostridia_Clostridiales_Clostridiales Incertae Sedis	0.1051.	-0.0241	-0.0314	0.0922	0.0406	0.017	0.0776	0.0613	-0.0204	0.026	0.0367	0.0421
Firmicutes_Clostridia_Clostridiales_Defluviitaleaceae	0.033	0.0658	-0.0281	0.0872	-0.0426	0.0028	0.1018	0.0688	0.002	0.0422	0.0138	0.0015
Firmicutes_Clostridia_Clostridiales_Eubacteriaceae	0.1013	0.1118.	0.1365*	0.0121	0.1569*	0.0886	-0.1606*	-0.0186	-0.0838	0.0263	0.0365	0.0336
Firmicutes_Clostridia_Clostridiales_Family XI	0.1742**	0.0716	0.129*	0.2517***	0.0513	0.2091***	0.0433	0.0945	-0.0524	-0.0893	0.0407	0.0046
Firmicutes_Clostridia_Clostridiales_Family XII	-0.0638	-0.0872	-0.0742	-0.0768	0.0612	0.0716	-0.1055.	0.0785	0.0924	-0.0898	-0.082	-0.069
Firmicutes_Clostridia_Clostridiales_Family XIII	0.0413	0.0698	0.058	0.0871	-0.026	-0.0531	-0.0194	-0.0946	-0.0053	0.002	0.0654	0.0708
Firmicutes_Clostridia_Clostridiales_Family XIV	0.0703	0.0315	0.0443	0.0925	-0.0256	0.0281	0.0169	0.0041	0.0237	-0.0645	0.0847	0.0644
Firmicutes_Clostridia_Clostridiales_Family XVII	-0.0508	-0.0729	-0.0508	-0.043	0.0378	0.0977	-0.0898	0.0406	0.082	-0.0833	-0.043	-0.0534
Firmicutes_Clostridia_Clostridiales_Family XVIII	0.0927	0.0447	-0.0306	0.0666	0.0532	0.0525	0.0667	0.0597	-0.0496	0.0779	-0.0059	-0.023
Firmicutes_Clostridia_Clostridiales_Gracilibacteraceae	-0.0445	-0.0393	-0.0526	0.0117	-0.0776	-0.0059	0.0164	-0.0827	0.0648	-0.0492	0.0151	-0.0047
Firmicutes_Clostridia_Clostridiales_Heliobacteriaceae	-0.0562	-0.2175***	-0.0962	0.1507*	-0.2601***	-0.0919	0.0756	0.0709	0.2285***	-0.2371***	-0.0218	-0.0223
Firmicutes_Clostridia_Clostridiales_Lachnospiraceae	0.0504	-0.0246	-0.029	0.1915**	-0.1172.	-0.0389	0.0994	-0.0588	0.1649**	-0.1751**	0.0929	0.0728
Firmicutes_Clostridia_Clostridiales_NA	-0.025	0.0389	0.0174	0.0634	-0.1188.	-0.0166	0.1282*	-0.0408	0.0178	-0.0392	0.1066.	0.0799
Firmicutes_Clostridia_Clostridiales_Peptococcaceae	0.0185	0	0.062	0.0173	-0.0948	0.0586	0.0144	0.0562	-0.0142	-0.0354	-0.0238	-0.0285
Firmicutes_Clostridia_Clostridiales_Peptostreptococcaceae	-0.0362	-0.1525*	-0.0529	0.091	-0.0597	0.0369	-0.0469	0.1032	0.1322*	-0.1534*	-0.1241*	-0.135*
Firmicutes_Clostridia_Clostridiales_Ruminococcaceae	-0.12.	-0.1952**	-0.1895**	0.1716**	-0.2077***	0	-0.0111	0.0785	0.3852***	-0.4044***	-0.0432	-0.074
Firmicutes_Clostridia_Clostridiales_Syntrophomonadaceae	-0.1161.	-0.1272*	-0.1385*	0.1046.	-0.116.	0.0537	0.0065	0.0781	0.2259***	-0.2375***	-0.1024	-0.1603*
Firmicutes_Clostridia_D8A-2_uncultured Firmicutes bacterium	0.0722	0.1051.	0.1088.	0.1051.	0.12.	-0.0036	-0.0888	-0.0358	-0.1088.	0.1088.	0.0237	0.0331
Firmicutes_Clostridia_DTU014_uncultured Bacilli bacterium	0.0892	0.068	0.0791	0.1073.	0.0337	0.0111	0.0635	-0.0188	-0.0221	-0.0305	0.1213.	0.1148.
Firmicutes_Clostridia_DTU014_uncultured bacterium	-0.0612	-0.0404	-0.0964	0.043	-0.1055.	-0.1081.	0.0951	0.0641	0.0456	0.0195	-0.0378	-0.0143
Firmicutes_Clostridia_MBA03_NA	0.0768	0.043	0.043	0.1055.	0.0169	0.0872	0.056	0.0641	-0.0273	-0.0247	0.0299	0.0117
Firmicutes_Clostridia_MBA03_uncultured compost bacterium	0.1055.	0.0742	-0.0039	0.0977	0.056	0.1055.	0.0247	0.1034	-0.0508	0.1055.	-0.0534	-0.0821
Firmicutes_Clostridia_NA_NA	0.0232	0.0453	-0.0017	0.0546	-0.0316	0.0495	-0.0029	0.0404	0.0243	-0.0573	-0.0171	-0.0637
Firmicutes_Clostridia_Thermoanaerobacterales_NA	0.0931	0.0957	0.0629	0.082	0.0402	0.0869	0.0982	0.0629	-0.069	0.0684	0.0499	0.0375
Firmicutes_Clostridia_Thermoanaerobacterales_Thermoanaerobacteraceae	-0.0767	-0.0021	-0.0878	0.0199	-0.082	-0.1534*	0.046	-0.0059	0.0594	0.0265	-0.074	-0.0652
Firmicutes_Erysipelotrichia_Erysipelotrichales_Erysipelotrichaceae	0.0361	0.0199	0.0278	0.0617	0.0369	-0.0307	-0.0652	0.0263	-0.0404	0.0693	-0.0866	-0.0769
Firmicutes_Limnochordia_Limnochordales_Limnochordaceae	0.0146	-0.0292	-0.0997	0.2069***	-0.0985	-0.0129	0.1821**	0.1333*	0.0598	-0.0325	-0.0335	-0.066
Firmicutes_Limnochordia_Limnochordales_uncultured	-0.0299	-0.0288	-0.0056	0.1088.	-0.0037	-0.0702	-0.0299	-0.0707	0.0721	-0.0905	-5e-04	3e-04
Firmicutes_NA_NA_NA	0.1779**	0.1206.	0.0807	0.0236	0.105.	0.0678	0.1271*	-0.0171	-0.2156***	0.3289***	0.0873	0.0483
Firmicutes_Negativicutes_Selenomonadales_Acidaminococcaceae	0.1056.	0.046	0.0782	0.0938	0.0875	0.1767**	0.0131	0.092	-0.07	0.0158	0.0252	0.0024
Firmicutes_Negativicutes_Selenomonadales_uncultured	-0.0115	-0.133*	-0.0614	0.049	-0.0479	-0.0576	0.0135	0.0157	0.1059.	-0.1337*	-0.0136	0.0485
Firmicutes_Negativicutes_Selenomonadales_Veillonellaceae	-0.1813**	-0.1137.	-0.209***	0.0738	-0.3798***	-0.3891***	0.2284***	-0.0986	0.2184***	-0.0907	0.0122	0.0293
Fusobacteria_Fusobacteriia_Fusobacteriales_Leptotrichiaceae	0.013	0.0296	0.0897	0.0115	-0.0589	0.0366	0.0252	0.0214	-0.0261	-0.0156	0.0604	0.0704
GAL15_uncultured bacterium_uncultured bacterium_uncultured bacterium	0.2626***	0.1264*	0.0343	0.2059**	0.1377*	0.1841**	-0.0324	0.266***	-0.1258*	0.2457***	-0.1442*	-0.1625**
GAL15_uncultured Firmicutes bacterium_uncultured Firmicutes bacterium_uncultured Firmicutes bacterium	0.036	0.0092	0.0219	0.0776	0.0535	0.0091	0.0074	-0.0548	-0.0373	0.0204	0.0133	0.011
Gemmatimonadetes_AKAU4049_uncultured soil bacterium_uncultured soil bacterium	0.1495*	0.1052.	-0.0055	0.1384*	0.0793	0.1495*	0.0351	0.1466*	-0.072	0.1495*	-0.0757	-0.1163.
Gemmatimonadetes_BD2-11 terrestrial group_metagenome_metagenome	0.0831	-0.0232	-0.0572	0.1176.	-0.1328*	-0.0245	0.1942**	0.1917**	-0.0442	0.1429*	-0.0573	-0.0848
Gemmatimonadetes_BD2-11 terrestrial group_NA_NA	0.043	0.0104	0.0091	0.0872	0.0013	-0.0326	0.0404	-0.0079	0.0299	-0.0534	0.0977	0.1055.
Gemmatimonadetes_BD2-11 terrestrial group_uncultured soil bacterium_uncultured soil bacterium	0.0079	-0.0161	-0.0653	5e-04	-0.0089	0.109.	0.0057	0.08	0.0328	0.0043	-0.0904	-0.1218.
Gemmatimonadetes_Gemmatimonadetes_Gemmatimonadales_Gemmatimonadaceae	-0.2594***	-0.2213***	-0.3463***	-0.0452	-0.5122***	-0.4885***	0.5126***	0.0893	0.1224.	0.1239*	-0.0598	-0.0109
Gemmatimonadetes_Longimicrobia_Longimicrobiales_Longimicrobiaceae	0.0306	0.0453	-0.0632	0.1222.	-0.0559	-0.0119	0.163**	0.0808	-0.0022	0.0631	0.0131	-0.0257
Gemmatimonadetes_S0134 terrestrial group_metagenome_metagenome	-0.0951	-0.0977	-0.0885	-0.0977	-0.069	0.0482	-0.0169	0.0092	0.0977	-0.1003	-0.0742	-0.0899
Gemmatimonadetes_S0134 terrestrial group_NA_NA	0.1583*	0.0897	0.1591*	-0.0034	0.2099***	0.068	-0.1892**	0.0019	-0.1412*	0.0033	0.041	0.076
Gemmatimonadetes_S0134 terrestrial group_uncultured bacterium_uncultured bacterium	0.0554	0.162*	0.2557***	-0.0725	0.3272***	0.1939**	-0.1919**	-0.256***	-0.2172***	-0.0169	0.1702**	0.1437*
Gemmatimonadetes_S0134 terrestrial group_uncultured compost bacterium_uncultured compost bacterium	0.15*	0.1833**	0.1986**	0.0107	0.1869**	0.0484	0.001	-0.1087.	-0.2154***	0.1389*	0.0941	0.0671
Gemmatimonadetes_S0134 terrestrial group_uncultured Gemmatimonadales bacterium_uncultured Gemmatimonadales bacterium	-0.0536	0.003	0.0424	0.1045.	0.0147	-0.0196	-0.0839	-0.0937	0.0184	-0.0492	-0.0515	-0.0409
Gemmatimonadetes_S0134 terrestrial group_uncultured Gemmatimonadetes bacterium_uncultured Gemmatimonadetes bacterium	0.1598*	0.097	0.1129.	0.2076***	0.1081.	-0.0054	-0.1253*	-0.0342	-0.0329	-0.0166	0.0618	0.124*
Gemmatimonadetes_S0134 terrestrial group_uncultured soil bacterium_uncultured soil bacterium	0.0634	-0.0664	0.0441	-0.0191	-0.0584	-0.0048	0.0394	0.0529	0.0242	-0.0541	0.106.	0.1234.
GN01_uncultured bacterium_uncultured bacterium_uncultured bacterium	0.0586	-0.0247	0.0143	0.0404	0.0299	-0.0612	0.0169	0.0641	-0.0065	-0.0117	0.0404	0.0873
Halanaerobiaeota_Halanaerobiia_Halanaerobiales_Halanaerobiaceae	0.0307	0.0384	-0.02	0.1797**	-0.0799	0.0318	0.1643**	0.0767	0.0102	-0.0332	0.002	-0.0261
Halanaerobiaeota_Halanaerobiia_Halanaerobiales_Halobacteroidaceae	0.1501*	0.0927	0.0478	0.1789**	0.0519	0.1622**	0.0794	0.1341*	-0.061	0.0319	0.0042	-0.0335
Hydrogenedentes_Hydrogenedentia_Hydrogenedentiales_Hydrogenedensaceae	0.2773***	0.2937***	0.3611***	0.1288*	0.31***	0.0693	-0.1611*	-0.1607*	-0.272***	0.1192.	0.2105***	0.1848**
Kiritimatiellaeota_Kiritimatiellae_Kiritimatiellales_Kiritimatiellaceae	0.0221	0.0013	0.0195	0.0247	-0.0534	-0.0482	-0.0326	-0.0589	0.0612	-0.0664	0.0898	0.0795
Kiritimatiellaeota_Kiritimatiellae_WCHB1-41_Lentisphaerae bacterium RIFOXYC12_FULL_60_16	0.0467	0.0275	-0.0369	0.0242	0.0048	-0.0213	0.0326	-0.0215	-0.0161	0.0431	0.0327	0.0481
Kiritimatiellaeota_Kiritimatiellae_WCHB1-41_metagenome	0.0461	0.0083	0.0203	0.0792	-0.0371	-0.0572	0.0053	-0.0474	0.0647	-0.0849	0.1328*	0.131*
Kiritimatiellaeota_Kiritimatiellae_WCHB1-41_NA	0.0682	0.0739	0.0172	0.0619	0.0331	0.0659	-9e-04	0.0408	-0.0319	0.0496	0.0131	-0.0294
Kiritimatiellaeota_Kiritimatiellae_WCHB1-41_uncultured bacterium	-0.0582	0.0152	-0.0816	0.0049	-0.1039.	-0.1193.	0.1245*	-0.1273*	4e-04	0.053	0.0131	0.0057
Kiritimatiellaeota_Kiritimatiellae_WCHB1-41_uncultured Chlorobi bacterium	0.1858**	0.1922**	0.1996**	0.0154	0.1716**	0.1661**	-0.0971	-0.1406*	-0.1528*	-0.0081	0.205**	0.1747**
Kiritimatiellaeota_Kiritimatiellae_WCHB1-41_uncultured Kiritimatiellaeota bacterium	0.0313	0.0368	0.0536	-0.0018	0.0544	0.0896	-0.118.	-0.0236	0.03	-0.0851	0.0716	0.0367
Kiritimatiellaeota_Kiritimatiellae_WCHB1-41_uncultured Lentisphaerae bacterium	0.0288	0.0198	-0.0197	0.0727	0.0119	-0.0618	0.0827	0.0131	-0.0196	0.0502	0.0654	0.0716
Kiritimatiellaeota_Kiritimatiellae_WCHB1-41_uncultured organism	0.0118	0.0221	0.0138	0.048	0.0496	0.0379	-0.0733	-0.0244	0.0258	-0.0216	-0.0428	-0.054
Kiritimatiellaeota_Kiritimatiellae_WCHB1-41_uncultured Planctomycetes Sva0500	0.0119	-0.0438	-0.0569	0.166**	-0.0269	-0.0609	0.0812	-0.0013	0.0683	-0.0605	0.0292	0.0182
Kiritimatiellaeota_Kiritimatiellae_WCHB1-41_uncultured soil bacterium	-0.0552	-0.0158	0.0032	-0.0108	-0.0614	-0.124*	0.0351	-0.1211.	0.053	-0.0481	0.0849	0.0923
Kiritimatiellaeota_Kiritimatiellae_WCHB1-41_uncultured soil bacterium PBS-III-20	-0.1329*	-0.0543	-0.2225***	0.1098.	-0.2003**	-0.1184.	0.1906**	-0.1001	0.1733**	-0.0697	0.0229	-0.0341
Kiritimatiellaeota_Kiritimatiellae_WCHB1-41_uncultured soil bacterium PBS-III-26	-0.0716	0.0326	-0.0586	-0.0716	-0.1003	-0.0794	0.0898	-0.0916	-0.0143	0.0664	-0.0039	-0.0195
Kiritimatiellaeota_Kiritimatiellae_WCHB1-41_uncultured Verrucomicrobia bacterium	0.1922**	0.1766**	0.1552*	0.1374*	0.1807**	0.062	-0.18**	-0.0816	-0.1072.	0.0823	0.0323	0.0093
Kiritimatiellaeota_Kiritimatiellae_WCHB1-41_uncultured Verrucomicrobiales bacterium	0.0154	-0.0225	-0.0193	0.0015	-0.0525	-0.0105	0.0808	0.0459	-0.0237	0.0649	-0.0075	-0.0277
Kiritimatiellaeota_Kiritimatiellae_WCHB1-41_uncultured verrucomicrobium DEV045	0.0985	0.0555	0.1281*	-0.024	0.0802	-0.0279	-0.1061.	-0.0806	-0.1174.	0.1089.	0.0824	0.0964
Latescibacteria_Latescibacteria bacterium DG_63_Latescibacteria bacterium DG_63_Latescibacteria bacterium DG_63	-0.0125	0.0753	-0.0174	-0.0517	-0.0231	-0.071	0.0046	-0.051	-0.0213	0.0739	-0.0231	-0.0116
Latescibacteria_Latescibacteria_Latescibacterales_Latescibacteraceae	0.3317***	0.1612*	0.1555*	0.0801	0.1484*	-0.0351	0.0205	0.0829	-0.1899**	0.2743***	0.1359*	0.1579*
Latescibacteria_metagenome_metagenome_metagenome	0.0886	-0.0621	0.0509	0.0519	-0.0226	0.1248*	-0.0499	0.2497***	-0.0258	0.0244	-0.162**	-0.1579*
Latescibacteria_NA_NA_NA	0.0365	-0.0577	0.0389	-0.1432*	0.0188	0.0555	0.022	0.1556*	-0.083	0.064	-0.0889	-0.0814
Latescibacteria_uncultured Acidobacterium sp._uncultured Acidobacterium sp._uncultured Acidobacterium sp.	-0.0751	-0.025	-0.1788**	-0.0725	-0.1765**	-0.114.	0.1043.	0.028	0.1096.	0.0128	-0.0802	-0.0953
Latescibacteria_uncultured bacterium mle1-16_uncultured bacterium mle1-16_uncultured bacterium mle1-16	0.3726***	0.2274***	0.2548***	0.1915**	0.3626***	0.4609***	-0.138*	0.3406***	-0.2583***	0.1008	-0.0854	-0.1546*
Latescibacteria_uncultured bacterium_uncultured bacterium_uncultured bacterium	0.3885***	0.2921***	0.3626***	0.0929	0.3919***	0.2894***	-0.1768**	-0.0832	-0.328***	0.2143***	0.1657**	0.1124.
Latescibacteria_uncultured Bacteroidetes bacterium_uncultured Bacteroidetes bacterium_uncultured Bacteroidetes bacterium	0.0664	-0.0299	-0.0326	0.0482	0.0247	0.0794	0.0742	0.0641	-0.0352	0.0456	-0.0143	-0.03
Latescibacteria_uncultured Desulfuromonadales bacterium_uncultured Desulfuromonadales bacterium_uncultured Desulfuromonadales bacterium	-0.0083	-0.0688	-0.0099	-0.0612	-0.0288	-0.0953	0.0521	-2e-04	-0.0221	0.0661	0.0275	0.0667
Latescibacteria_uncultured Fibrobacteres bacterium_uncultured Fibrobacteres bacterium_uncultured Fibrobacteres bacterium	0.1495*	0.1052.	-0.0055	0.1384*	0.0793	0.1495*	0.0351	0.1466*	-0.072	0.1495*	-0.0757	-0.1163.
Latescibacteria_uncultured Latescibacteria bacterium_uncultured Latescibacteria bacterium_uncultured Latescibacteria bacterium	0.1325*	0.1144.	0.1775**	0.0505	0.123.	0.1279*	-0.1134.	-0.0355	-0.1292*	0.0641	0.0689	0.0484
Latescibacteria_uncultured low G+C Gram-positive bacterium_uncultured low G+C Gram-positive bacterium_uncultured low G+C Gram-positive bacterium	0.1775**	0.2119***	0.237***	0.0446	0.2655***	0.1083.	-0.2249***	-0.0965	-0.1897**	0.1147.	0.0478	0.0567
Latescibacteria_uncultured Pelobacter sp._uncultured Pelobacter sp._uncultured Pelobacter sp.	0.2707***	0.1086.	0.1108.	0.1777**	0.1445*	0.0567	0.0227	0.0419	-0.0749	0.0441	0.1871**	0.2171***
Latescibacteria_uncultured prokaryote_uncultured prokaryote_uncultured prokaryote	0.0379	-0.0977	-0.0397	0.0081	-0.0564	-0.0379	0.0141	0.1776**	0.0343	-0.0162	-0.0829	-0.0549
Latescibacteria_uncultured proteobacterium_uncultured proteobacterium_uncultured proteobacterium	0.163**	0.0851	0.1593*	0.2174***	0.0975	0.1598*	-0.13*	0.0422	-0.0219	-0.0758	0.0384	0.009
Latescibacteria_uncultured soil bacterium PBS-II-5_uncultured soil bacterium PBS-II-5_uncultured soil bacterium PBS-II-5	0.1544*	0.1686**	0.1671**	0.103	0.0921	0.0258	-0.0493	-0.148*	-0.1457*	0.131*	0.1609*	0.1478*
Latescibacteria_uncultured soil bacterium PBS-III-30_uncultured soil bacterium PBS-III-30_uncultured soil bacterium PBS-III-30	0.0565	0.0146	0.0385	0.0889	0.0273	0.0039	-0.0938	-0.0122	0.0205	0.0439	0.021	0.0122
Latescibacteria_uncultured soil bacterium PBS-III-32a_uncultured soil bacterium PBS-III-32a_uncultured soil bacterium PBS-III-32a	0.1162.	0.0256	0.0292	0.0738	0.092	0.0611	-0.0161	0.0743	-0.0719	0.0848	-0.0295	-0.0186
Latescibacteria_uncultured soil bacterium PRR-10_uncultured soil bacterium PRR-10_uncultured soil bacterium PRR-10	-0.041	-0.0564	-0.1121.	0.0533	-0.0236	0.0236	0.0182	-0.0101	0.0948	-0.0545	-0.0162	-0.0238
Latescibacteria_uncultured soil bacterium PRR-12_uncultured soil bacterium PRR-12_uncultured soil bacterium PRR-12	-0.0658	-0.0208	0.0458	0.1649**	0.0385	-0.0661	-0.1629**	-0.1346*	0.0427	-0.0773	-0.1073.	-0.0977
Latescibacteria_uncultured soil bacterium_uncultured soil bacterium_uncultured soil bacterium	0.1404*	-0.1175.	-0.0743	-0.0385	-0.0212	0.0945	-0.0065	0.2278***	0.0731	0.0094	-0.068	-0.0898
Latescibacteria_unidentified bacterium wb1_H11_unidentified bacterium wb1_H11_unidentified bacterium wb1_H11	0.0872	0.0977	0.1029	-0.0117	0.0924	0.0664	-0.0638	-0.0589	-0.082	-0.0039	0.1055.	0.0664
LCP-89_saltmarsh clone LCP-89_saltmarsh clone LCP-89_saltmarsh clone LCP-89	0.1752**	0.1872**	0.1524*	0.0822	0.2093***	0.1223.	-0.0822	-0.0354	-0.1616*	0.1132.	0.1043.	0.0837
LCP-89_uncultured bacterium_uncultured bacterium_uncultured bacterium	-0.0309	-0.024	0.0531	0.0282	0.006	-0.0363	-0.0525	-0.0731	0.0067	0.0102	0.0077	0.002
Lentisphaerae_Lentisphaeria_Victivallales_Arctic95B-14	-0.0263	-0.0115	0.0181	0.0035	0.0501	0.0033	-0.1353*	-0.0396	0.03	-0.0327	-0.0944	-0.0859
Lentisphaerae_Lentisphaeria_Victivallales_GWF2-44-16	0.0507	-0.0027	0.0157	0.1183.	0.0617	-0.0038	-0.0354	-0.0127	0.0389	-0.0738	0.0472	0.0653
Lentisphaerae_Lentisphaeria_Victivallales_NA	-0.0117	0.0508	0.0352	0.0169	-0.0378	-0.0013	0.0482	-0.0079	0.0143	-0.0404	0.0742	0.0951
Lentisphaerae_Lentisphaeria_Victivallales_PRD18C08	0.1314*	0.1294*	0.1054.	0.1042.	0.0881	0.0968	0.0505	0.0049	-0.0963	0.0666	0.0793	0.0465
Lentisphaerae_Oligosphaeria_Oligosphaerales_Lenti-02	0.1405*	0.1056.	0.1355*	0.1864**	0.211***	-0.0085	-0.177**	-0.052	-0.0843	0.084	-0.0301	-0.0073
Lentisphaerae_Oligosphaeria_SS1-B-02-17_uncultured bacterium	0.06	0.031	-0.0119	0.0715	0.0859	0.0974	-0.0167	0.0975	-0.0327	0.0785	-0.1114.	-0.1309*
Margulisbacteria_metagenome_metagenome_metagenome	-0.1034	-0.1209.	-0.0988	-0.0998	-0.0224	0.1032	-0.0754	0.0352	0.1274*	-0.1301*	-0.0831	-0.1016
Margulisbacteria_microbial mat metagenome_microbial mat metagenome_microbial mat metagenome	0.0768	0.043	0.043	0.1055.	0.0169	0.0872	0.056	0.0641	-0.0273	-0.0247	0.0299	0.0117
Margulisbacteria_uncultured bacterium_uncultured bacterium_uncultured bacterium	-0.0133	0.0866	0.0217	-0.0445	-0.0171	-0.0151	0.0667	-0.1068.	-0.0754	0.0849	0.0551	0.0275
Margulisbacteria_uncultured delta proteobacterium_uncultured delta proteobacterium_uncultured delta proteobacterium	0.0194	0.0488	0.1384*	-0.0608	0.057	-0.0053	-0.1427*	-0.1767**	-0.0948	0.043	0.0696	0.038
Margulisbacteria_uncultured Gram-positive bacterium_uncultured Gram-positive bacterium_uncultured Gram-positive bacterium	-0.02	0.0304	-0.0349	0.0115	-0.0698	-0.0792	0.0921	-0.0703	0.0112	0.0089	0.0667	0.0613
Margulisbacteria_uncultured organism_uncultured organism_uncultured organism	0.043	0.0104	0.0091	0.0872	0.0013	-0.0326	0.0404	-0.0079	0.0299	-0.0534	0.0977	0.1055.
Modulibacteria_Moduliflexia_Moduliflexales_Moduliflexaceae	0.0722	0.0473	0.0699	0.041	0.0096	0.0137	-0.0792	-0.0226	0.0267	-0.0532	0.0699	0.0944
NA_NA_NA_NA	-0.044	0.1188.	-0.0877	-0.0669	-0.1775**	-0.2383***	0.154*	-0.1724**	-0.0549	0.2428***	0.0461	-0.0415
Nitrospinae_P9X2b3D02_NA_NA	0.0425	0.0622	0.0853	-0.0111	0.0407	0.0801	0.1018	-0.0545	-0.0721	-0.0019	0.0894	0.0594
Nitrospinae_P9X2b3D02_uncultured Nitrospina sp._uncultured Nitrospina sp.	-0.2007**	-0.0639	-0.1981**	-0.0999	-0.1816**	-0.1166.	0.099	-0.0467	0.105.	0.0058	-0.0764	-0.098
Nitrospinae_P9X2b3D02_uncultured prokaryote_uncultured prokaryote	-0.095	-0.1035	-0.2286***	-0.0173	-0.0262	0.1704**	-0.1097.	0.3239***	0.1899**	-0.0786	-0.3429***	-0.378***
Nitrospinae_P9X2b3D02_uncultured soil bacterium_uncultured soil bacterium	0.043	0.0104	0.0091	0.0872	0.0013	-0.0326	0.0404	-0.0079	0.0299	-0.0534	0.0977	0.1055.
Nitrospirae_4-29-1_NA_NA	-0.0836	0.1584*	0.0573	-0.3462***	0.0922	0.0527	0.0519	-0.2903***	-0.1795**	0.1334*	0.169**	0.0857
Nitrospirae_4-29-1_uncultured bacterium_uncultured bacterium	0.0218	-0.028	0.1087.	-0.1756**	0.4175***	0.4434***	-0.4802***	0.1764**	-0.0556	-0.0743	-0.321***	-0.3358***
Nitrospirae_4-29-1_uncultured Myxococcales bacterium_uncultured Myxococcales bacterium	0.0355	0.0063	0.0457	-0.0225	-0.0679	-0.0703	0.0444	-0.0986	-0.0306	0.084	0.093	0.0875
Nitrospirae_4-29-1_uncultured Nitrospira sp._uncultured Nitrospira sp.	0.0013	0.0386	0.0538	0.0809	0.0361	-0.0354	-0.0769	-0.0339	0.0109	-0.0229	-0.0299	-0.0034
Nitrospirae_4-29-1_uncultured Nitrospirae bacterium_uncultured Nitrospirae bacterium	0.0364	0.0811	0.0919	-0.054	0.3843***	0.5446***	-0.3023***	0.1165.	-0.0672	-0.1528*	-0.1361*	-0.2351***
Nitrospirae_4-29-1_uncultured prokaryote_uncultured prokaryote	0.0141	0.2093***	0.0895	-0.111.	0.036	0.0022	0.0609	-0.1721**	-0.1858**	0.1971**	0.0788	0.061
Nitrospirae_4-29-1_uncultured proteobacterium_uncultured proteobacterium	0.1547*	0.1754**	0.2325***	-0.0372	0.3572***	0.3296***	-0.3374***	-0.0567	-0.1389*	-0.0352	0.003	-0.0354
Nitrospirae_661256_uncultured bacterium_uncultured bacterium	-0.0247	-0.0195	0.0586	-0.0898	-0.0273	-0.0404	-0.0534	-0.0916	-0.0586	0.0898	0.0195	0.0274
Nitrospirae_Nitrospira_Nitrospirales_Nitrospiraceae	-0.3177***	-0.4621***	-0.6244***	-0.112.	-0.3921***	-0.1108.	0.2741***	0.6124***	0.3443***	-0.0418	-0.6414***	-0.6056***
Nitrospirae_Thermodesulfovibrionia_NA_NA	0.2161***	0.2249***	0.2257***	0.021	0.257***	0.1152.	-0.1649**	-0.0402	-0.2037**	0.1447*	0.0916	0.0733
Nitrospirae_Thermodesulfovibrionia_Thermodesulfovibrionales_Thermodesulfovibrionaceae	-0.3741***	-0.4041***	-0.7017***	-0.2157***	-0.4655***	-0.0554	0.3416***	0.5138***	0.3635***	-0.0393	-0.5944***	-0.6433***
Nitrospirae_Thermodesulfovibrionia_uncultured bacterium_uncultured bacterium	-0.0647	0.04	-0.1153.	0.008	-0.1526*	-0.1864**	0.1601*	-0.0308	0.0104	0.0936	-0.0098	-0.0257
Nitrospirae_Thermodesulfovibrionia_uncultured_NA	-0.2383***	-0.0898	-0.2363***	-0.2405***	0.0018	0.076	-0.0541	0.0242	0.115.	-0.0913	-0.2083***	-0.2706***
Nitrospirae_Thermodesulfovibrionia_uncultured_uncultured bacterium	0.0369	0.131*	-0.0063	-0.1106.	0.1872**	0.065	-0.2141***	0.1043.	-0.1082.	0.1505*	-0.2701***	-0.2527***
Nitrospirae_Thermodesulfovibrionia_uncultured_uncultured Nitrospira sp.	0.214***	0.1611*	0.1804**	0.1077.	0.2461***	0.0214	-0.231***	0.0695	-0.1547*	0.1677**	-0.0517	0.016
Nitrospirae_Thermodesulfovibrionia_uncultured_uncultured Nitrospiraceae bacterium	-0.1497*	-0.239***	-0.2472***	-0.1475*	-0.1613*	-0.0144	0.0019	0.1195.	0.2502***	-0.24***	-0.1616*	-0.1665**
Nitrospirae_Thermodesulfovibrionia_uncultured_uncultured Nitrospirae bacterium	0.0641	0.0355	-0.0233	0.0182	0.0438	0.1199.	0.0496	0.09	-0.0385	0.1035	-0.0667	-0.1026
Nitrospirae_Thermodesulfovibrionia_uncultured_uncultured prokaryote	0.2653***	0.3384***	0.3508***	-0.1762**	0.5332***	0.2726***	-0.3565***	-0.1887**	-0.2794***	0.0058	0.2801***	0.288***
Nitrospirae_Thermodesulfovibrionia_uncultured_uncultured Sphingobacteriales bacterium	0.5151***	0.4781***	0.4322***	0.1381*	0.5681***	0.359***	-0.1848**	-0.1752**	-0.3624***	0.1289*	0.4585***	0.4339***
Omnitrophicaeota_Candidatus Omnitrophica bacterium CG1_02_44_16_Candidatus Omnitrophica bacterium CG1_02_44_16_Candidatus Omnitrophica bacterium CG1_02_44_16	-0.0637	-0.0302	0.0114	-0.0226	0.0748	0.0552	-0.1538*	-0.0614	0.0472	-0.0685	-0.0423	-0.0596
Omnitrophicaeota_Candidatus Omnitrophus magneticus_Candidatus Omnitrophus magneticus_Candidatus Omnitrophus magneticus	-0.0502	0.0258	-0.0438	-0.061	-0.0776	-0.1212.	0.0569	-0.1171.	-0.01	0.0742	0.0035	0.0069
Omnitrophicaeota_NA_NA_NA	0.1045.	0.0353	0.0477	-0.0171	0.1352*	0.0252	-0.1401*	-0.0411	-0.0531	0.0923	-0.0452	-0.0248
Omnitrophicaeota_Omnitrophia_Omnitrophales_Omnitrophaceae	0.0222	0.131*	0.0544	-0.0046	0.0637	-0.0772	-0.0906	-0.2133***	-0.0485	0.0664	0.0469	0.0035
Omnitrophicaeota_Omnitrophica WOR_2 bacterium RIFCSPLOWO2_12_FULL_51_24_Omnitrophica WOR_2 bacterium RIFCSPLOWO2_12_FULL_51_24_Omnitrophica WOR_2 bacterium RIFCSPLOWO2_12_FULL_51_24	0.0426	0.0251	0.0323	-0.0123	0.0817	0.034	-0.0566	0.0344	-0.0161	0.0083	0.0243	0.0347
Omnitrophicaeota_Omnitrophica WOR_2 bacterium RIFOXYA2_FULL_38_17_Omnitrophica WOR_2 bacterium RIFOXYA2_FULL_38_17_Omnitrophica WOR_2 bacterium RIFOXYA2_FULL_38_17	0.1337*	0.1126.	0.0782	0.0957	0.0537	0.0851	0.0207	0.0253	-0.0588	0.0216	0.0598	0.0231
Omnitrophicaeota_uncultured bacterium_uncultured bacterium_uncultured bacterium	-0.1193.	0.1083.	-0.1778**	0.0096	-0.1332*	-0.3511***	0.2231***	-0.2223***	0.0127	0.1588*	0.0512	0.0085
Omnitrophicaeota_uncultured Banisveld landfill bacterium BVC56_uncultured Banisveld landfill bacterium BVC56_uncultured Banisveld landfill bacterium BVC56	-0.312***	-0.1485*	-0.2311***	-0.3708***	-0.158*	-0.0651	-0.0362	-0.0033	0.1434*	-0.0599	-0.1787**	-0.2077***
Omnitrophicaeota_uncultured beta proteobacterium_uncultured beta proteobacterium_uncultured beta proteobacterium	-0.0569	-0.0384	-0.0985	0.0295	-0.0847	-0.0719	0.082	0.0692	0.0555	-0.0078	-0.0518	-0.0457
Omnitrophicaeota_uncultured Firmicutes bacterium_uncultured Firmicutes bacterium_uncultured Firmicutes bacterium	-0.136*	-0.1371*	-0.1471*	-0.1055.	-0.1591*	-0.0014	0.0089	-0.0039	0.178**	-0.1627**	-0.0587	-0.0904
Omnitrophicaeota_uncultured organism_uncultured organism_uncultured organism	0.0939	-2e-04	-0.0552	0.1337*	0.0309	0.0243	0.0562	0.084	-4e-04	0.0447	-0.0571	-0.0732
Omnitrophicaeota_uncultured planctomycete_uncultured planctomycete_uncultured planctomycete	0.0518	0.0272	0.0339	-0.0215	0.049	0.0168	-0.0056	-0.0174	-0.0293	0.0433	0.0388	0.0229
Omnitrophicaeota_uncultured prokaryote_uncultured prokaryote_uncultured prokaryote	-1e-04	-0.0201	-0.0436	-0.0381	-0.0132	0.0093	0.0288	0.0208	0.008	-0.0362	0.0204	-9e-04
Omnitrophicaeota_uncultured soil bacterium PBS-87_uncultured soil bacterium PBS-87_uncultured soil bacterium PBS-87	0.0534	0.0898	0.0898	0.0091	0.0768	0.0586	0.0039	-0.0589	-0.0924	0.0534	0.082	0.0586
Omnitrophicaeota_uncultured Verrucomicrobia bacterium_uncultured Verrucomicrobia bacterium_uncultured Verrucomicrobia bacterium	0.0914	0.1311*	0.1272*	-5e-04	0.148*	0.0588	-0.0185	-0.0871	-0.1418*	0.1148.	0.0635	0.0742
Patescibacteria_ABY1_Candidatus Buchananbacteria_Candidatus Buchananbacteria bacterium RIFCSPLOWO2_01_FULL_46_12	0.052	0.0335	0.0941	-0.0236	0.0557	-0.0239	-0.1071.	-0.0358	-0.0886	0.1162.	-0.0057	0.0221
Patescibacteria_ABY1_Candidatus Buchananbacteria_metagenome	0.0073	0.037	0.0388	0.0295	-0.0645	-0.0349	0.0113	-0.0472	0.0534	-0.0756	0.1162.	0.1237*
Patescibacteria_ABY1_Candidatus Buchananbacteria_Parcubacteria group bacterium CG2_30_48_51	0.043	0.0104	0.0091	0.0872	0.0013	-0.0326	0.0404	-0.0079	0.0299	-0.0534	0.0977	0.1055.
Patescibacteria_ABY1_Candidatus Buchananbacteria_Parcubacteria group bacterium GW2011_GWA2_38_13	-0.0247	-0.0195	0.0586	-0.0898	-0.0273	-0.0404	-0.0534	-0.0916	-0.0586	0.0898	0.0195	0.0274
Patescibacteria_ABY1_Candidatus Falkowbacteria_Candidatus Falkowbacteria bacterium GW2011_GWA2_41_14	-0.0475	-0.0023	0.04	0.0702	0.046	-0.0385	-0.1321*	-0.1404*	0.0355	-0.0883	-0.0521	-0.0823
Patescibacteria_ABY1_Candidatus Falkowbacteria_Candidatus Falkowbacteria bacterium GW2011_GWF2_43_32	-0.0597	0.0411	0.0085	0.0029	-0.0169	-0.0505	0.006	-0.1404*	-0.02	0.0258	-0.0118	-0.0381
Patescibacteria_ABY1_Candidatus Falkowbacteria_Candidatus Falkowbacteria bacterium RIFOXYD2_FULL_34_120	-0.1087.	-0.1245*	-0.1069.	-0.1032	-0.0255	0.0171	-0.0795	0.0233	0.1309*	-0.1264*	-0.0903	-0.083
Patescibacteria_ABY1_Candidatus Falkowbacteria_NA	0.0482	-0.01	0.0863	0.0771	0.0183	0.0173	-0.0364	-0.0358	-0.0096	-0.0264	0.0842	0.0613
Patescibacteria_ABY1_Candidatus Falkowbacteria_uncultured bacterium	-0.075	0.0126	-0.0046	-0.0538	0.0667	0.0378	-0.1333*	-0.0776	0.017	-0.0345	-0.0742	-0.1067.
Patescibacteria_ABY1_Candidatus Falkowbacteria_uncultured Parcubacteria group bacterium	-0.006	-0.0058	0.0183	0.1217.	0.0073	0.0143	-0.0188	-0.0199	0.0316	-0.0703	-0.0483	-0.0658
Patescibacteria_ABY1_Candidatus Kerfeldbacteria_NA	-0.1022	-0.0333	-0.0551	-0.0258	-0.0455	-0.1109.	-0.0316	-0.0256	0.077	-0.064	-0.0533	-0.0374
Patescibacteria_ABY1_Candidatus Kerfeldbacteria_Parcubacteria group bacterium ADurb.Bin326	0.043	0.0104	0.0091	0.0872	0.0013	-0.0326	0.0404	-0.0079	0.0299	-0.0534	0.0977	0.1055.
Patescibacteria_ABY1_Candidatus Kerfeldbacteria_Parcubacteria group bacterium GW2011_GWC2_49_9	-0.0951	-0.0977	-0.0885	-0.0977	-0.069	0.0482	-0.0169	0.0092	0.0977	-0.1003	-0.0742	-0.0899
Patescibacteria_ABY1_Candidatus Kerfeldbacteria_Parcubacteria group bacterium GW2011_GWD2_43_10	0.0306	-0.0771	0.0091	-0.0426	0.004	0.0439	0.0539	0.1139.	-0.0318	0.0345	-0.0672	-0.0752
Patescibacteria_ABY1_Candidatus Kerfeldbacteria_uncultured bacterium	-0.0676	-0.0244	-0.0427	-0.0392	-0.0312	0.0906	-0.044	-0.0645	0.0663	-0.0788	-0.034	-0.0914
Patescibacteria_ABY1_Candidatus Komeilibacteria_Candidatus Komeilibacteria bacterium RIFCSPHIGHO2_01_FULL_52_14	0.0393	0.0209	-0.0464	0.0961	-0.0589	-0.0285	0.0502	0.0632	0.032	0.0344	-8e-04	-0.0101
Patescibacteria_ABY1_Candidatus Komeilibacteria_uncultured bacterium	-0.0117	0.0508	0.0352	0.0169	-0.0378	-0.0013	0.0482	-0.0079	0.0143	-0.0404	0.0742	0.0951
Patescibacteria_ABY1_Candidatus Kuenenbacteria_uncultured bacterium	0.0231	-0.039	0.0686	-0.0514	-0.0237	0.0333	-0.0807	-0.0609	-0.017	0.019	0.0646	0.0419
Patescibacteria_ABY1_Candidatus Magasanikbacteria_Candidatus Magasanikbacteria bacterium GW2011_GWA2_56_11	-0.0664	0.0378	-0.069	-0.082	-0.0794	-0.0872	0.0794	-0.0079	0.0195	0.0404	-0.0352	-0.0352
Patescibacteria_ABY1_Candidatus Magasanikbacteria_Candidatus Magasanikbacteria bacterium RIFCSPHIGHO2_02_FULL_44_13	0.0977	0.0664	0.0742	0.056	0.1055.	0.0065	-0.0977	0.0406	-0.0664	0.0742	-0.0273	0.0039
Patescibacteria_ABY1_Candidatus Magasanikbacteria_Candidatus Magasanikbacteria bacterium RIFOXYC2_FULL_42_28	0.0446	0.0557	0.1145.	-0.0717	0.0465	0.0188	-0.0831	-0.1066.	-0.0997	0.0606	0.0888	0.0666
Patescibacteria_ABY1_Candidatus Magasanikbacteria_Candidatus Magasanikbacteria bacterium RIFOXYD1_FULL_40_23	-0.0376	0.0094	-0.0571	-0.092	-0.098	-0.0078	0.0289	-0.0913	0.0213	0.0455	0.0174	-0.0259
Patescibacteria_ABY1_Candidatus Magasanikbacteria_Candidatus Magasanikbacteria bacterium RIFOXYD12_FULL_33_17	0.0664	-0.0299	-0.0326	0.0482	0.0247	0.0794	0.0742	0.0641	-0.0352	0.0456	-0.0143	-0.03
Patescibacteria_ABY1_Candidatus Magasanikbacteria_Candidatus Magasanikbacteria bacterium RIFOXYD2_FULL_36_9	-0.0555	0.031	-0.0726	0.0599	-0.0343	-0.0337	0.0459	0.0046	0.0254	0.0383	-0.0598	-0.076
Patescibacteria_ABY1_Candidatus Magasanikbacteria_Candidatus Uhrbacteria bacterium RIFCSPHIGHO2_02_FULL_57_19	-0.0022	-0.0462	-0.0584	0.059	-0.0539	-0.1201.	0.0796	0.0909	0.0278	0.0056	0.0016	0.0514
Patescibacteria_ABY1_Candidatus Magasanikbacteria_Candidatus Uhrbacteria bacterium RIFOXYC2_FULL_47_19	-0.1195.	0.0081	-0.161*	-0.066	-0.1653**	-0.1081.	0.1389*	0.0276	0.0757	0.0219	-0.0554	-0.0788
Patescibacteria_ABY1_Candidatus Magasanikbacteria_metagenome	-0.0321	0.0689	-0.0332	-0.0321	-0.0227	0.0297	0.0664	-0.0024	-0.0214	0.0683	0.0084	-0.0121
Patescibacteria_ABY1_Candidatus Magasanikbacteria_NA	0.0876	0.0407	-0.1039.	0.0515	0.0778	0.1181.	0.0857	0.1679**	-0.0453	0.1671**	-0.0781	-0.0974
Patescibacteria_ABY1_Candidatus Magasanikbacteria_Parcubacteria group bacterium ADurb.Bin192	0.0872	0.0977	0.1029	-0.0117	0.0924	0.0664	-0.0638	-0.0589	-0.082	-0.0039	0.1055.	0.0664
Patescibacteria_ABY1_Candidatus Magasanikbacteria_uncultured bacterium	-0.2089***	-0.0046	-0.1728**	-0.2243***	-0.2114***	-0.2508***	0.2219***	-0.0128	-0.016	0.1829**	-0.0794	-0.0797
Patescibacteria_ABY1_Candidatus Magasanikbacteria_uncultured Parcubacteria group bacterium	0.2298***	0.2657***	0.2084***	0.1067.	0.1779**	0.0769	-0.0078	-0.083	-0.2171***	0.1478*	0.1703**	0.1648**
Patescibacteria_ABY1_Candidatus Magasanikbacteria_uncultured planctomycete	0.0057	0.0263	0.0481	-0.0474	0.102	0.0789	-0.135*	-0.0178	-0.0028	-0.007	-0.0111	-0.008
Patescibacteria_ABY1_Candidatus Magasanikbacteria_uncultured soil bacterium	0.0299	0.0586	0.0664	-0.0195	0.069	0.0195	-0.0716	-0.0353	-0.043	0.0352	0.0117	0.0195
Patescibacteria_ABY1_Candidatus Uhrbacteria_Candidatus Uhrbacteria bacterium GW2011_GWF2_41_40	0.1055.	0.0742	-0.0039	0.0977	0.056	0.1055.	0.0247	0.1034	-0.0508	0.1055.	-0.0534	-0.0821
Patescibacteria_ABY1_Candidatus Uhrbacteria_Candidatus Uhrbacteria bacterium RIFOXYC12_FULL_57_11	0.031	-0.0111	-0.0648	0.0829	-0.0428	-0.1108.	0.098	0.0315	0.0333	-0.0018	0.0496	0.0569
Patescibacteria_ABY1_NA_NA	-0.1728**	-0.1417*	-0.1238*	-0.2079***	-0.0844	-0.0312	-0.0616	-0.0451	0.1051.	-0.0537	-0.0751	-0.088
Patescibacteria_Berkelbacteria_Berkelbacteria bacterium GW2011_GWA2_38_9_Berkelbacteria bacterium GW2011_GWA2_38_9	0.0768	0.043	0.043	0.1055.	0.0169	0.0872	0.056	0.0641	-0.0273	-0.0247	0.0299	0.0117
Patescibacteria_Berkelbacteria_Berkelbacteria bacterium GW2011_GWE1_39_12_Berkelbacteria bacterium GW2011_GWE1_39_12	0.0889	0.0602	0.0279	0.0477	0.0495	0.1547*	-3e-04	0.0589	-0.0326	-0.011	0.0048	-0.0464
Patescibacteria_Berkelbacteria_candidate division WS2 bacterium ADurb.Bin280_candidate division WS2 bacterium ADurb.Bin280	-0.0846	-0.0508	-0.0169	0.0664	-0.0065	-0.0664	-0.082	-0.0916	0.0716	-0.0742	-0.0977	-0.1042.
Patescibacteria_Berkelbacteria_Candidatus Berkelbacteria bacterium CG1_02_42_45_Candidatus Berkelbacteria bacterium CG1_02_42_45	0.1055.	0.0742	-0.0039	0.0977	0.056	0.1055.	0.0247	0.1034	-0.0508	0.1055.	-0.0534	-0.0821
Patescibacteria_Berkelbacteria_Candidatus Berkelbacteria bacterium CG2_30_43_20_Candidatus Berkelbacteria bacterium CG2_30_43_20	-0.0117	0.0508	0.0352	0.0169	-0.0378	-0.0013	0.0482	-0.0079	0.0143	-0.0404	0.0742	0.0951
Patescibacteria_Berkelbacteria_Candidatus Berkelbacteria bacterium RIFOXYA2_FULL_43_10_Candidatus Berkelbacteria bacterium RIFOXYA2_FULL_43_10	-0.0033	0.0163	-0.0128	-0.0534	-0.0149	-0.0041	-0.0033	-0.0221	-0.0336	0.0658	-0.0095	-0.017
Patescibacteria_Berkelbacteria_metagenome_metagenome	-0.0185	-0.0612	0.0249	0.0081	-0.0238	-0.0453	-0.0426	-0.0337	0.0794	-0.11.	0.0687	0.0924
Patescibacteria_Berkelbacteria_NA_NA	0.0577	0.0017	-0.0105	0.1124.	-0.049	-0.0084	0.0645	0.0111	0.0692	-0.0891	0.1326*	0.1308*
Patescibacteria_Berkelbacteria_uncultured bacterium_uncultured bacterium	0.1118.	0.2154***	0.1217.	-0.0065	0.0643	0.071	0.0325	-0.1475*	-0.1595*	0.0677	0.1784**	0.1261*
Patescibacteria_Berkelbacteria_uncultured epsilon proteobacterium 1025_uncultured epsilon proteobacterium 1025	-0.0244	-0.0049	0.0168	0.018	0.0145	-0.0358	-0.0281	-0.0554	-0.0189	0.025	-0.015	-0.0137
Patescibacteria_Berkelbacteria_uncultured Epsilonproteobacteria bacterium_uncultured Epsilonproteobacteria bacterium	-0.0716	0.0326	-0.0586	-0.0716	-0.1003	-0.0794	0.0898	-0.0916	-0.0143	0.0664	-0.0039	-0.0195
Patescibacteria_Berkelbacteria_uncultured Microgenomates group bacterium_uncultured Microgenomates group bacterium	-0.0508	-0.0729	-0.0508	-0.043	0.0378	0.0977	-0.0898	0.0406	0.082	-0.0833	-0.043	-0.0534
Patescibacteria_Berkelbacteria_uncultured organism_uncultured organism	-0.0117	0.0508	0.0352	0.0169	-0.0378	-0.0013	0.0482	-0.0079	0.0143	-0.0404	0.0742	0.0951
Patescibacteria_Berkelbacteria_uncultured soil bacterium_uncultured soil bacterium	-0.1084.	-0.0518	-0.0144	-0.1754**	-0.1125.	-0.0569	-0.017	-0.1343*	-0.0179	0.0744	-0.0191	-0.0269
Patescibacteria_CPR2_NA_NA	0.0559	0.0751	-0.0114	0.066	-0.0226	0.0403	0.0849	0.0373	-0.0553	0.0635	-0.0167	-0.0318
Patescibacteria_CPR2_uncultured bacterium_uncultured bacterium	0.1938**	0.0952	0.192**	0.0905	0.1586*	0.2805***	-0.1105.	0.2325***	-0.1518*	0.0286	-0.1174.	-0.1324*
Patescibacteria_CPR2_uncultured Clostridium sp._uncultured Clostridium sp.	-0.0507	0.0159	-0.0837	0.1014	-0.1237*	-0.1577*	0.1059.	-0.0507	0.084	-0.0391	0.063	0.0757
Patescibacteria_CPR2_uncultured Firmicutes bacterium_uncultured Firmicutes bacterium	-0.0661	0.0236	-0.0505	0.0397	-0.0232	-0.056	0.0286	-0.0472	0.0303	0.0351	-0.0468	-0.0675
Patescibacteria_CPR2_uncultured microorganism_uncultured microorganism	0.1685**	0.0645	0.0633	0.2123***	0.0416	0.1932**	0.1343*	0.1446*	-0.0651	-0.0246	0.0479	0.0079
Patescibacteria_CPR2_uncultured Spirochaetes bacterium_uncultured Spirochaetes bacterium	-0.0508	-0.0729	-0.0508	-0.043	0.0378	0.0977	-0.0898	0.0406	0.082	-0.0833	-0.043	-0.0534
Patescibacteria_Gracilibacteria_Absconditabacteriales (SR1)_metagenome	-0.0716	0.0326	-0.0586	-0.0716	-0.1003	-0.0794	0.0898	-0.0916	-0.0143	0.0664	-0.0039	-0.0195
Patescibacteria_Gracilibacteria_bacterium enrichment culture clone 24(2013)_bacterium enrichment culture clone 24(2013)	0.2681***	0.1864**	0.1992**	0.1621**	0.2833***	0.0538	-0.2411***	0.0524	-0.1255*	0.1189.	0.037	0.0947
Patescibacteria_Gracilibacteria_Candidatus Abawacabacteria_NA	-0.0499	-0.062	-0.0537	-0.1249*	-0.0241	0.0822	-0.0473	0.0231	0.071	-0.122.	-0.0454	-0.0747
Patescibacteria_Gracilibacteria_Candidatus Abawacabacteria_uncultured bacterium	-0.1047.	-0.1001	-0.1631**	0.0363	-0.1352*	-0.0708	0.1161.	0.0525	0.1213.	-0.0561	-0.0654	-0.0956
Patescibacteria_Gracilibacteria_Candidatus Abawacabacteria_uncultured candidate division GN10 bacterium	-0.1249*	-0.1147.	-0.1776**	-0.0679	-0.1596*	-0.0617	0.0934	0.0718	0.1432*	-0.0978	-0.0885	-0.1075.
Patescibacteria_Gracilibacteria_Candidatus Abawacabacteria_uncultured organism	0.0462	0.0083	0.0203	0.0795	-0.0367	-0.0572	0.0057	-0.0472	0.0645	-0.0848	0.1329*	0.1311*
Patescibacteria_Gracilibacteria_Candidatus Peregrinibacteria bacterium GW2011_GWA2_47_7_Candidatus Peregrinibacteria bacterium GW2011_GWA2_47_7	-0.017	0.0383	0.0569	0.0206	0.0569	-0.0298	-0.0629	-0.1068.	-0.0198	-0.0335	-0.0318	-0.0475
Patescibacteria_Gracilibacteria_Candidatus Peregrinibacteria_Candidatus Peregrinibacteria bacterium RIFCSPLOWO2_01_FULL_48_20	0.0664	-0.0299	-0.0326	0.0482	0.0247	0.0794	0.0742	0.0641	-0.0352	0.0456	-0.0143	-0.03
Patescibacteria_Gracilibacteria_Candidatus Peregrinibacteria_metagenome	0.2172***	0.2845***	0.2859***	-0.0339	0.2886***	0.2025**	-0.0687	-0.1853**	-0.3207***	0.1831**	0.1669**	0.0914
Patescibacteria_Gracilibacteria_Candidatus Peregrinibacteria_NA	0.0281	-0.0211	0.0078	-0.0301	-0.0222	0.0378	-0.0368	0.0311	-0.0069	-0.012	-0.0284	-0.0467
Patescibacteria_Gracilibacteria_Candidatus Peregrinibacteria_uncultured bacterium	0.3283***	0.2455***	0.2741***	0.1953**	0.2818***	0.1615*	-0.1085.	-0.0212	-0.1847**	0.0242	0.2667***	0.2507***
Patescibacteria_Gracilibacteria_Candidatus Peregrinibacteria_uncultured proteobacterium	-0.0378	-0.0117	-0.0794	0.0352	-0.0924	-0.1003	0.1029	0.0223	0.0404	0.0065	0.0039	-0.0091
Patescibacteria_Gracilibacteria_Candidatus Peribacteria_Candidatus Peregrinibacteria bacterium CG1_02_54_53	0.0518	0.0607	0.0956	0.0471	0.1694**	0.0314	-0.1569*	-0.0169	-0.0523	0.0445	-0.0661	-0.0407
Patescibacteria_Gracilibacteria_Candidatus Peribacteria_groundwater metagenome	-0.0247	-0.0195	0.0586	-0.0898	-0.0273	-0.0404	-0.0534	-0.0916	-0.0586	0.0898	0.0195	0.0274
Patescibacteria_Gracilibacteria_Candidatus Peribacteria_metagenome	0.1055.	0.0742	-0.0039	0.0977	0.056	0.1055.	0.0247	0.1034	-0.0508	0.1055.	-0.0534	-0.0821
Patescibacteria_Gracilibacteria_Candidatus Peribacteria_NA	0.1264*	0.0675	0.0688	0.0084	0.0789	0.0473	0.037	-0.019	-0.0961	0.0816	0.0866	0.0634
Patescibacteria_Gracilibacteria_Candidatus Peribacteria_uncultured Epsilonproteobacteria bacterium	0.0768	0.043	0.043	0.1055.	0.0169	0.0872	0.056	0.0641	-0.0273	-0.0247	0.0299	0.0117
Patescibacteria_Gracilibacteria_groundwater metagenome_groundwater metagenome	0.187**	0.0569	-0.1056.	0.1648**	0.0687	0.3431***	0.0898	0.2849***	-0.0361	0.1452*	-0.1925**	-0.2839***
Patescibacteria_Gracilibacteria_JGI 0000069-P22_uncultured Candidatus Gracilibacteria bacterium	-0.0508	-0.0729	-0.0508	-0.043	0.0378	0.0977	-0.0898	0.0406	0.082	-0.0833	-0.043	-0.0534
Patescibacteria_Gracilibacteria_marine metagenome_marine metagenome	-0.0378	-0.0117	-0.0794	0.0352	-0.0924	-0.1003	0.1029	0.0223	0.0404	0.0065	0.0039	-0.0091
Patescibacteria_Gracilibacteria_NA_NA	0.0732	0.0846	-0.012	0.007	0.0516	0.0184	0.0233	0.0414	-0.0442	0.0862	-0.0091	-0.0202
Patescibacteria_Gracilibacteria_uncultured bacterium_uncultured bacterium	-0.0161	0.0141	-0.038	-0.0749	-0.0259	-0.0983	0.0912	0.045	-0.0155	0.0648	0.0017	-0.0012
Patescibacteria_Gracilibacteria_uncultured marine bacterium_uncultured marine bacterium	-0.0023	0.0635	0.0422	-0.1102.	0.0488	0.0999	-0.0358	-0.1041.	-0.0445	-0.0177	0.0542	0.0015
Patescibacteria_Gracilibacteria_uncultured sediment bacterium_uncultured sediment bacterium	-0.0098	0.0643	0.0096	-0.0685	0.005	-0.0282	0.0133	-0.0351	-0.0514	0.0408	0.0513	0.0293
Patescibacteria_Gracilibacteria_uncultured soil bacterium_uncultured soil bacterium	0.2047**	0.0763	0.0639	0.1229.	0.1541*	0.0955	-0.0818	0.184**	-0.0889	0.1044.	-0.0831	-0.0673
Patescibacteria_Kazania_candidate division Kazan bacterium RBG_13_50_9_candidate division Kazan bacterium RBG_13_50_9	0.0758	0.0602	0.0591	0.1776**	0.0523	0.0192	-0.0351	0.0415	0.008	-0.0308	-0.0173	-0.0132
Patescibacteria_Kazania_NA_NA	0.0714	0.0019	0.0262	0.1245*	0.0535	-0.0233	-0.0357	0.0649	-7e-04	-0.0082	0.0023	0.0317
Patescibacteria_Kazania_uncultured bacterium_uncultured bacterium	0.0872	0.0977	0.1029	-0.0117	0.0924	0.0664	-0.0638	-0.0589	-0.082	-0.0039	0.1055.	0.0664
Patescibacteria_Microgenomatia_Candidatus Amesbacteria_Microgenomates bacterium SCGC AAA011-B20	0.0681	0.0734	0.0722	0.0218	0.128*	0.1157.	-0.0845	-0.0535	-0.0638	0.029	0.0112	-0.0168
Patescibacteria_Microgenomatia_Candidatus Amesbacteria_NA	0.1661**	0.163**	0.1526*	0.0643	0.1693**	0.1229.	-0.0731	-0.0356	-0.137*	0.0888	0.0563	0.0147
Patescibacteria_Microgenomatia_Candidatus Amesbacteria_uncultured bacterium	-0.1166.	-0.1659**	-0.1453*	-0.0814	-0.0895	-0.0337	-0.0262	0.154*	0.1438*	-0.1438*	-0.1613*	-0.1478*
Patescibacteria_Microgenomatia_Candidatus Amesbacteria_uncultured soil bacterium	0.073	0.0449	0.0867	0.0494	0.0713	0.0636	-0.0811	-0.0106	-0.0535	0.015	-0.0026	-0.0037
Patescibacteria_Microgenomatia_Candidatus Beckwithbacteria_uncultured bacterium	-0.0508	-0.0729	-0.0508	-0.043	0.0378	0.0977	-0.0898	0.0406	0.082	-0.0833	-0.043	-0.0534
Patescibacteria_Microgenomatia_Candidatus Collierbacteria_uncultured Microgenomates group bacterium	-0.0508	-0.0729	-0.0508	-0.043	0.0378	0.0977	-0.0898	0.0406	0.082	-0.0833	-0.043	-0.0534
Patescibacteria_Microgenomatia_Candidatus Curtissbacteria_Microgenomates bacterium SCGC AAA011-L6	-0.1003	-0.0065	-0.0885	-0.0846	-0.0846	-0.1055.	0.082	0.0092	0.0091	0.0612	-0.0326	-0.0247
Patescibacteria_Microgenomatia_Candidatus Curtissbacteria_NA	-0.0638	-0.0872	-0.0742	-0.0768	0.0612	0.0716	-0.1055.	0.0785	0.0924	-0.0898	-0.082	-0.069
Patescibacteria_Microgenomatia_Candidatus Curtissbacteria_uncultured bacterium	-0.1347*	-0.0238	-0.0629	-0.0096	-0.0666	-0.1145.	0.0023	-0.0805	0.0533	-0.0107	-0.0847	-0.0763
Patescibacteria_Microgenomatia_Candidatus Curtissbacteria_uncultured Microgenomates group bacterium	0.0526	0.0672	0.0829	-0.0262	0.1202.	0.1289*	-0.0864	-0.0452	-0.0544	-0.019	0.0844	0.042
Patescibacteria_Microgenomatia_Candidatus Gottesmanbacteria_Candidatus Gottesmanbacteria bacterium GW2011_GWA1_34_13	-0.0013	-0.0612	0.0273	-0.0273	-0.0456	0.0352	-0.0456	0.089	-0.0013	-0.0169	-0.0651	-0.0742
Patescibacteria_Microgenomatia_Candidatus Levybacteria_Candidatus Levybacteria bacterium GW2011_GWC2_37_7	-0.0169	-0.0729	-0.0378	0.0716	-0.0143	-0.0143	-0.0039	0.0785	0.0352	-0.0352	-0.0651	-0.0534
Patescibacteria_Microgenomatia_Candidatus Roizmanbacteria_Candidatus Roizmanbacteria bacterium RIFCSPLOWO2_01_FULL_40_32	0.0908	0.1367*	0.0963	0.0047	0.0519	0.0709	0.0081	-0.0738	-0.1039.	0.017	0.1199.	0.0634
Patescibacteria_Microgenomatia_Candidatus Roizmanbacteria_Candidatus Roizmanbacteria bacterium RIFCSPLOWO2_02_FULL_36_11	0.0995	0.0543	0.0589	0.1016	0.0754	-0.0186	-0.0402	0.0231	-0.0256	0.0144	0.0502	0.0778
Patescibacteria_Microgenomatia_Candidatus Roizmanbacteria_Microgenomates bacterium OLB22	0.0998	0.0546	0.0592	0.1014	0.0759	-0.0183	-0.041	0.0233	-0.0261	0.0151	0.0495	0.0772
Patescibacteria_Microgenomatia_Candidatus Roizmanbacteria_NA	-0.0701	-0.1048.	-0.0811	-0.0312	-0.0962	-0.0692	0.0369	0.0406	0.081	-0.0419	-0.0287	-0.0111
Patescibacteria_Microgenomatia_Candidatus Shapirobacteria_metagenome	0.0534	0.0898	0.0898	0.0091	0.0768	0.0586	0.0039	-0.0589	-0.0924	0.0534	0.082	0.0586
Patescibacteria_Microgenomatia_Candidatus Shapirobacteria_NA	-0.0117	0.0508	0.0352	0.0169	-0.0378	-0.0013	0.0482	-0.0079	0.0143	-0.0404	0.0742	0.0951
Patescibacteria_Microgenomatia_Candidatus Shapirobacteria_uncultured bacterium	0.043	0.0104	0.0091	0.0872	0.0013	-0.0326	0.0404	-0.0079	0.0299	-0.0534	0.0977	0.1055.
Patescibacteria_Microgenomatia_Candidatus Woesebacteria_Candidatus Woesebacteria bacterium GW2011_GWA1_39_21	0.046	-0.0532	-0.0366	0.0883	0.0055	-0.03	0.0351	0.0786	0.0273	-0.0014	-0.0181	4e-04
Patescibacteria_Microgenomatia_Candidatus Woesebacteria_Candidatus Woesebacteria bacterium GW2011_GWA2_40_7b	0.0786	0.0227	-0.0231	0.1212.	-0.075	0.0092	0.163**	0.1049.	-0.0304	0.0124	0.0544	0.0115
Patescibacteria_Microgenomatia_Candidatus Woesebacteria_Candidatus Woesebacteria bacterium GW2011_GWB1_41_10	0.0585	-1e-04	0	0.0859	0.0105	0.0979	-0.0018	0.2137***	0.0092	0.0017	-0.1266*	-0.114.
Patescibacteria_Microgenomatia_Candidatus Woesebacteria_Candidatus Woesebacteria bacterium RBG_13_46_13	-0.0951	-0.0977	-0.0885	-0.0977	-0.069	0.0482	-0.0169	0.0092	0.0977	-0.1003	-0.0742	-0.0899
Patescibacteria_Microgenomatia_Candidatus Woesebacteria_Candidatus Woesebacteria bacterium RIFCSPHIGHO2_01_FULL_39_28	0.0534	0.0898	0.0898	0.0091	0.0768	0.0586	0.0039	-0.0589	-0.0924	0.0534	0.082	0.0586
Patescibacteria_Microgenomatia_Candidatus Woesebacteria_Candidatus Woesebacteria bacterium RIFOXYA1_FULL_43_16	0.1292*	0.0131	0.0849	0.0155	0.0985	0.1163.	0.0144	0.0895	-0.0684	-0.0083	0.0098	-0.0166
Patescibacteria_Microgenomatia_Candidatus Woesebacteria_groundwater metagenome	0.0363	0.0517	0.0935	-0.0718	0.206**	0.22***	-0.0944	0.0307	-0.052	-0.1061.	0.0374	0.0203
Patescibacteria_Microgenomatia_Candidatus Woesebacteria_NA	0.0945	0.1245*	0.1249*	-0.0438	0.1435*	0.076	-0.0754	-0.0051	-0.1435*	0.144*	-0.0291	-0.0378
Patescibacteria_Microgenomatia_Candidatus Woesebacteria_uncultured bacterium	0.036	0.081	0.2065***	0.002	0.1235.	0.0492	-0.0963	-0.1596*	-0.1062.	0.0263	0.0914	0.0853
Patescibacteria_Microgenomatia_Candidatus Woesebacteria_uncultured eubacterium WCHB1-56	-0.0332	-0.0394	0.0274	-0.0282	0.0051	0.0608	-0.0957	-0.0526	0.0416	-0.0351	-0.0528	-0.0732
Patescibacteria_Microgenomatia_Candidatus Woesebacteria_uncultured Microgenomates group bacterium	-0.1468*	-7e-04	-0.0961	0.0087	-0.1259*	-0.0312	0.0535	-0.077	0.1056.	-0.0663	-0.0847	-0.1313*
Patescibacteria_Microgenomatia_Candidatus Woykebacteria_uncultured bacterium	-0.0041	0.002	-0.0647	-0.0169	-0.0539	-4e-04	0.1163.	-0.0199	-0.035	0.0794	-0.0129	-0.035
Patescibacteria_Microgenomatia_Candidatus Woykebacteria_uncultured Microgenomates group bacterium	0.0421	0.1036	0.0853	-0.0767	0.0555	0.0593	-0.0463	-0.0802	-0.1028	0.0623	0.0404	0.002
Patescibacteria_Microgenomatia_metagenome_metagenome	-0.0293	-0.0955	-0.0378	0.0333	-0.0858	-0.0736	-0.0702	-0.0971	0.1407*	-0.1359*	0.0639	0.0914
Patescibacteria_Microgenomatia_NA_NA	-0.0041	0.0064	0.0262	-0.1036	0.0353	-0.0147	-0.0213	0.0024	-0.0279	-0.0078	0.0277	0.0105
Patescibacteria_Microgenomatia_uncultured soil bacterium_uncultured soil bacterium	0.0604	0.0025	0.0334	0.0666	-0.008	-0.0076	-0.0228	0.0047	-0.0498	0.0684	0.0081	0.0451
Patescibacteria_NA_NA_NA	-0.068	-0.0362	-5e-04	-0.0319	-0.0242	-0.0153	-0.1327*	-0.1222.	0.0657	-0.1092.	-0.0473	-0.0678
Patescibacteria_Parcubacteria_Candidatus Adlerbacteria_metagenome	-0.043	-0.0378	-0.0964	0.0794	-0.082	-0.0846	0.1081.	0.0406	0.056	0.0013	-0.0195	-0.0378
Patescibacteria_Parcubacteria_Candidatus Azambacteria_Candidatus Azambacteria bacterium GW2011_GWF1_41_10	0.0299	0.0586	0.0664	-0.0195	0.069	0.0195	-0.0716	-0.0353	-0.043	0.0352	0.0117	0.0195
Patescibacteria_Parcubacteria_Candidatus Azambacteria_Candidatus Azambacteria bacterium GW2011_GWF2_42_22	0.0664	-0.0299	-0.0326	0.0482	0.0247	0.0794	0.0742	0.0641	-0.0352	0.0456	-0.0143	-0.03
Patescibacteria_Parcubacteria_Candidatus Azambacteria_Entomoplasmatales bacterium EntAcro10	-0.0109	-0.0311	0.0187	-0.0463	0.0186	-0.0185	0.0408	0.0377	-0.0372	0.0483	-0.0291	-0.0117
Patescibacteria_Parcubacteria_Candidatus Azambacteria_NA	0.0087	0.0021	0.0706	-0.0612	-0.0252	-0.1115.	-0.0541	-0.0967	-0.0903	0.1507*	0.039	0.0731
Patescibacteria_Parcubacteria_Candidatus Azambacteria_Parcubacteria bacterium C7867-005	-0.1748**	-0.1746**	-0.2124***	-0.1177.	-0.0771	0.0372	-0.0852	0.0283	0.2161***	-0.1543*	-0.1398*	-0.161*
Patescibacteria_Parcubacteria_Candidatus Azambacteria_uncultured bacterium	-0.1042.	-0.03	-0.1385*	-0.0418	-0.1621**	-0.1088.	0.1439*	-0.0361	0.0058	0.0907	-0.0483	-0.0216
Patescibacteria_Parcubacteria_Candidatus Campbellbacteria_Candidatus Campbellbacteria bacterium GW2011_GWC2_35_28	-0.0247	-0.0195	0.0586	-0.0898	-0.0273	-0.0404	-0.0534	-0.0916	-0.0586	0.0898	0.0195	0.0274
Patescibacteria_Parcubacteria_Candidatus Campbellbacteria_Candidatus Campbellbacteria bacterium RIFOXYC2_FULL_35_25	0.0568	0.0385	0.0389	0.005	0.0201	0.0457	-0.0205	0.0078	-0.0775	0.1383*	-0.0238	-0.0385
Patescibacteria_Parcubacteria_Candidatus Campbellbacteria_uncultured soil bacterium	0.0831	0.0332	-0.0024	0.0781	-0.0064	0.1487*	0.0446	0.1816**	-0.0055	0.0115	-0.0715	-0.0963
Patescibacteria_Parcubacteria_Candidatus Colwellbacteria_Candidatus Harrisonbacteria bacterium RIFCSPHIGHO2_02_FULL_40_20	0.0068	-0.0171	-0.0657	-5e-04	-0.0096	0.1087.	0.0054	0.0795	0.0336	0.0031	-0.0905	-0.1218.
Patescibacteria_Parcubacteria_Candidatus Colwellbacteria_NA	-0.0508	-0.0729	-0.0508	-0.043	0.0378	0.0977	-0.0898	0.0406	0.082	-0.0833	-0.043	-0.0534
Patescibacteria_Parcubacteria_Candidatus Doudnabacteria_Candidatus Doudnabacteria bacterium RIFCSPHIGHO2_01_48_18	-0.0247	-0.0195	0.0586	-0.0898	-0.0273	-0.0404	-0.0534	-0.0916	-0.0586	0.0898	0.0195	0.0274
Patescibacteria_Parcubacteria_Candidatus Doudnabacteria_NA	-0.0117	0.0508	0.0352	0.0169	-0.0378	-0.0013	0.0482	-0.0079	0.0143	-0.0404	0.0742	0.0951
Patescibacteria_Parcubacteria_Candidatus Giovannonibacteria_Candidatus Giovannonibacteria bacterium GW2011_GWF2_42_19	0.11.	0.1092.	-0.0499	0.1059.	0.0428	0.1074.	0.0782	0.1612*	-0.0724	0.1902**	-0.0971	-0.1366*
Patescibacteria_Parcubacteria_Candidatus Giovannonibacteria_NA	0.0664	-0.0299	-0.0326	0.0482	0.0247	0.0794	0.0742	0.0641	-0.0352	0.0456	-0.0143	-0.03
Patescibacteria_Parcubacteria_Candidatus Giovannonibacteria_uncultured bacterium	0.0821	0.1776**	0.1063.	-0.0264	0.0834	0.0315	0.0105	-0.0983	-0.1357*	0.1121.	0.1112.	0.0667
Patescibacteria_Parcubacteria_Candidatus Jorgensenbacteria_Candidatus Adlerbacteria bacterium GW2011_GWC1_50_9	-0.0463	0.0337	0.0026	-0.017	-0.0489	-0.0901	-0.0046	-0.1147.	0.0271	-0.0303	0.0858	0.1
Patescibacteria_Parcubacteria_Candidatus Jorgensenbacteria_Candidatus Jorgensenbacteria bacterium GW2011_GWA1_48_11	0.0709	0.0551	0.0759	-0.0245	0.1048.	0.0501	-0.0018	-0.0209	-0.098	0.1071.	0.0285	0.0292
Patescibacteria_Parcubacteria_Candidatus Jorgensenbacteria_NA	0.0402	-0.0334	-0.012	0.035	0.0426	0.0554	0.0424	0.0581	-0.0272	0.0102	0.0043	0.0016
Patescibacteria_Parcubacteria_Candidatus Jorgensenbacteria_Parcubacteria group bacterium GW2011_GWA1_48_11b	0.0664	-0.0299	-0.0326	0.0482	0.0247	0.0794	0.0742	0.0641	-0.0352	0.0456	-0.0143	-0.03
Patescibacteria_Parcubacteria_Candidatus Kaiserbacteria_uncultured bacterium	-0.0846	-0.0508	-0.0169	0.0664	-0.0065	-0.0664	-0.082	-0.0916	0.0716	-0.0742	-0.0977	-0.1042.
Patescibacteria_Parcubacteria_Candidatus Kaiserbacteria_uncultured Parcubacteria group bacterium	-0.0846	-0.0508	-0.0169	0.0664	-0.0065	-0.0664	-0.082	-0.0916	0.0716	-0.0742	-0.0977	-0.1042.
Patescibacteria_Parcubacteria_Candidatus Liptonbacteria_NA	0.0439	0.0255	-0.0713	0.1254*	-0.0188	0.0142	0.0943	0.1019	0.004	0.0754	-0.0516	-0.0848
Patescibacteria_Parcubacteria_Candidatus Lloydbacteria_Candidatus Lloydbacteria bacterium RIFCSPHIGHO2_02_FULL_50_18	0.0254	0.017	0.0365	-0.0388	0.0921	0.1163.	-0.1089.	-0.0127	5e-04	-0.062	0.0439	0.0089
Patescibacteria_Parcubacteria_Candidatus Moranbacteria_Candidatus Moranbacteria bacterium GW2011_GWC2_40_12	-0.1159.	-0.1519*	-0.0942	-0.1324*	-0.1096.	0.0048	-0.049	0.0519	0.116.	-0.1234.	-0.1299*	-0.1321*
Patescibacteria_Parcubacteria_Candidatus Moranbacteria_Candidatus Moranbacteria bacterium GW2011_GWE1_49_15	-0.0378	-0.0117	-0.0794	0.0352	-0.0924	-0.1003	0.1029	0.0223	0.0404	0.0065	0.0039	-0.0091
Patescibacteria_Parcubacteria_Candidatus Moranbacteria_NA	-0.0839	-0.0376	-0.0741	-0.0839	-0.1289*	-0.0455	0.0229	-0.0815	0.0843	-0.0589	0.0065	-0.0177
Patescibacteria_Parcubacteria_Candidatus Moranbacteria_uncultured bacterium	-0.0658	-0.0618	-0.1157.	-0.0764	-0.0882	-0.0415	0.0711	0.0419	0.0345	0.0015	-0.0722	-0.0857
Patescibacteria_Parcubacteria_Candidatus Moranbacteria_uncultured organism	0.0768	0.043	0.043	0.1055.	0.0169	0.0872	0.056	0.0641	-0.0273	-0.0247	0.0299	0.0117
Patescibacteria_Parcubacteria_Candidatus Moranbacteria_uncultured Parcubacteria group bacterium	0.0474	0.0481	0.0479	-0.0228	0.0706	0.1597*	-0.0346	0.0413	-0.0781	0.0409	-0.0077	-0.0273
Patescibacteria_Parcubacteria_Candidatus Moranbacteria_uncultured soil bacterium	-0.0951	-0.0977	-0.0885	-0.0977	-0.069	0.0482	-0.0169	0.0092	0.0977	-0.1003	-0.0742	-0.0899
Patescibacteria_Parcubacteria_Candidatus Nealsonbacteria_NA	0.0977	0.0664	0.0742	0.056	0.1055.	0.0065	-0.0977	0.0406	-0.0664	0.0742	-0.0273	0.0039
Patescibacteria_Parcubacteria_Candidatus Nomurabacteria_Candidatus Nomurabacteria bacterium CG2_30_43_9	0.1055.	0.0742	-0.0039	0.0977	0.056	0.1055.	0.0247	0.1034	-0.0508	0.1055.	-0.0534	-0.0821
Patescibacteria_Parcubacteria_Candidatus Nomurabacteria_Candidatus Nomurabacteria bacterium GW2011_GWD1_44_10	-0.0446	-0.0352	0.0017	0.0647	-0.0423	-0.0812	-0.0813	-0.1068.	0.0941	-0.0997	-0.0061	-0.0181
Patescibacteria_Parcubacteria_Candidatus Nomurabacteria_marine metagenome	-0.0013	-0.0612	0.0273	-0.0273	-0.0456	0.0352	-0.0456	0.089	-0.0013	-0.0169	-0.0651	-0.0742
Patescibacteria_Parcubacteria_Candidatus Nomurabacteria_NA	-0.0938	-0.0811	0.0019	-0.1149.	0.0105	-0.001	-0.0462	-0.0853	0.0184	0.0111	-0.0414	-0.0505
Patescibacteria_Parcubacteria_Candidatus Nomurabacteria_uncultured bacterium	0.0977	0.0664	0.0742	0.056	0.1055.	0.0065	-0.0977	0.0406	-0.0664	0.0742	-0.0273	0.0039
Patescibacteria_Parcubacteria_Candidatus Ryanbacteria_Candidatus Giovannonibacteria bacterium GW2011_GWB1_47_6b	-0.1414*	0.0377	-0.1402*	-0.0989	-0.1808**	-0.1822**	0.1796**	-0.0497	0.025	0.0862	-0.0286	-0.0339
Patescibacteria_Parcubacteria_Candidatus Terrybacteria_Candidatus Terrybacteria bacterium RIFCSPHIGHO2_01_FULL_58_15	-0.0508	-0.0729	-0.0508	-0.043	0.0378	0.0977	-0.0898	0.0406	0.082	-0.0833	-0.043	-0.0534
Patescibacteria_Parcubacteria_Candidatus Vogelbacteria_Candidatus Vogelbacteria bacterium GWA1_51_14	-0.0664	0.0378	-0.069	-0.082	-0.0794	-0.0872	0.0794	-0.0079	0.0195	0.0404	-0.0352	-0.0352
Patescibacteria_Parcubacteria_Candidatus Vogelbacteria_Candidatus Vogelbacteria bacterium RIFOXYB1_FULL_42_16	0.0664	-0.0299	-0.0326	0.0482	0.0247	0.0794	0.0742	0.0641	-0.0352	0.0456	-0.0143	-0.03
Patescibacteria_Parcubacteria_Candidatus Vogelbacteria_Candidatus Vogelbacteria bacterium RIFOXYD1_FULL_46_19	0.0534	0.0898	0.0898	0.0091	0.0768	0.0586	0.0039	-0.0589	-0.0924	0.0534	0.082	0.0586
Patescibacteria_Parcubacteria_Candidatus Vogelbacteria_NA	0.1055.	0.0742	-0.0039	0.0977	0.056	0.1055.	0.0247	0.1034	-0.0508	0.1055.	-0.0534	-0.0821
Patescibacteria_Parcubacteria_Candidatus Vogelbacteria_uncultured bacterium	0.043	0.0104	0.0091	0.0872	0.0013	-0.0326	0.0404	-0.0079	0.0299	-0.0534	0.0977	0.1055.
Patescibacteria_Parcubacteria_Candidatus Vogelbacteria_uncultured Parcubacteria group bacterium	0.1055.	0.0742	-0.0039	0.0977	0.056	0.1055.	0.0247	0.1034	-0.0508	0.1055.	-0.0534	-0.0821
Patescibacteria_Parcubacteria_Candidatus Wolfebacteria_Candidatus Wolfebacteria bacterium RIFCSPHIGHO2_01_FULL_48_22	0.0773	0.0698	0.0865	0.0093	0.0273	0.0126	-0.0682	-0.0835	-0.0144	-0.05	0.1383*	0.1034
Patescibacteria_Parcubacteria_Candidatus Wolfebacteria_NA	0.1026	0.0696	0.0708	0.1252*	0.1262*	0.1162.	-0.0023	-0.0066	-0.0973	0.0556	0.0407	-0.0148
Patescibacteria_Parcubacteria_Candidatus Wolfebacteria_uncultured Parcubacteria group bacterium	0.0534	0.0898	0.0898	0.0091	0.0768	0.0586	0.0039	-0.0589	-0.0924	0.0534	0.082	0.0586
Patescibacteria_Parcubacteria_Candidatus Yanofskybacteria_Candidatus Yanofskybacteria bacterium GW2011_GWF2_43_596	0.1332*	-0.0632	9e-04	0.1163.	0.0331	-0.0219	0.0274	0.1181.	0.0016	0.0103	0.0099	0.0502
Patescibacteria_Parcubacteria_Candidatus Yanofskybacteria_Candidatus Yanofskybacteria bacterium RIFCSPHIGHO2_02_FULL_46_19	0.0518	-0.0461	-0.0222	0.0866	0.0222	0.0776	-0.0014	0.0743	-0.0406	0.0499	-0.0662	-0.0498
Patescibacteria_Parcubacteria_Candidatus Yanofskybacteria_metagenome	-0.0321	-0.0031	-0.0614	0.0941	-0.0614	-0.1038	0.0875	-0.0033	0.0431	-0.0197	-0.0098	-0.0081
Patescibacteria_Parcubacteria_Candidatus Yanofskybacteria_NA	0.0052	-0.0934	-0.0122	-0.0839	0.0161	0.0239	-0.0426	0.0713	0.0216	-0.0178	-0.1025	-0.0888
Patescibacteria_Parcubacteria_Candidatus Yanofskybacteria_uncultured bacterium	0.1833**	0.1548*	0.1189.	0.031	0.1705**	-0.0226	-0.0994	-0.0722	-0.0767	0.0409	0.1658**	0.1969**
Patescibacteria_Parcubacteria_Candidatus Yanofskybacteria_uncultured deep-sea bacterium	0.0452	-0.016	0.0372	-0.0096	0.0457	-0.0138	-0.1322*	0.0811	-0.0151	0.0179	-0.1029	-0.0655
Patescibacteria_Parcubacteria_Candidatus Yanofskybacteria_uncultured organism	-0.0794	-0.0456	-0.1029	-0.0326	-0.1081.	-0.0924	0.0977	0.0223	0.0664	0.0117	-0.0091	-0.0013
Patescibacteria_Parcubacteria_Candidatus Zambryskibacteria_Candidatus Zambryskibacteria bacterium RIFCSPHIGHO2_01_FULL_43_27	0.1055.	0.0742	-0.0039	0.0977	0.056	0.1055.	0.0247	0.1034	-0.0508	0.1055.	-0.0534	-0.0821
Patescibacteria_Parcubacteria_Candidatus Zambryskibacteria_metagenome	-0.0508	-0.0729	-0.0508	-0.043	0.0378	0.0977	-0.0898	0.0406	0.082	-0.0833	-0.043	-0.0534
Patescibacteria_Parcubacteria_Candidatus Zambryskibacteria_NA	-0.0694	-0.0032	-0.0386	-0.0285	-0.0741	-0.0269	0.0148	-0.0426	-0.0118	0.0787	-0.0687	-0.0954
Patescibacteria_Parcubacteria_Candidatus Zambryskibacteria_Parcubacteria group bacterium GW2011_GWA2_40_14	0.1178.	0.0303	-0.0249	0.0943	0.0168	0.0743	0.1004	0.0381	-0.045	0.0819	0.0339	0.0028
Patescibacteria_Parcubacteria_Candidatus Zambryskibacteria_uncultured bacterium	-0.0378	-0.0117	-0.0794	0.0352	-0.0924	-0.1003	0.1029	0.0223	0.0404	0.0065	0.0039	-0.0091
Patescibacteria_Parcubacteria_GWB1-42-6_uncultured Parcubacteria group bacterium	0.0143	0.0221	0.0508	-0.0586	0.0456	-0.0195	0.0664	-0.0353	-0.0742	0.0977	0.0482	0.0495
Patescibacteria_Parcubacteria_NA_NA	0.1307*	0.1593*	0.0975	0.0809	0.1898**	0.1489*	-0.1329*	-0.0586	-0.1015	0.0953	0.0102	-0.0714
Patescibacteria_Parcubacteria_Paceibacterales_Paceibacteraceae	-0.1199.	-0.072	-0.024	0.0941	-0.0092	-0.0941	-0.1162.	-0.1299*	0.1015	-0.1052.	-0.1384*	-0.1477*
Patescibacteria_Parcubacteria_Parcubacteria group bacterium GW2011_GWA1_40_21_Parcubacteria group bacterium GW2011_GWA1_40_21	0.043	0.0104	0.0091	0.0872	0.0013	-0.0326	0.0404	-0.0079	0.0299	-0.0534	0.0977	0.1055.
Patescibacteria_Parcubacteria_UBA9983_NA	-0.0442	-0.0381	-0.0596	-0.0103	0.0286	0.0043	-0.0408	0.0482	0.0607	-0.0308	-0.0519	-0.0503
Patescibacteria_Parcubacteria_uncultured bacterium_uncultured bacterium	-0.1131.	0.0156	-0.0787	-0.1828**	-0.178**	-0.1097.	0.1345*	-0.1264*	-0.0446	0.1975**	-0.0027	-0.0549
Patescibacteria_Parcubacteria_uncultured deep-sea bacterium_uncultured deep-sea bacterium	-0.0846	-0.0508	-0.0169	0.0664	-0.0065	-0.0664	-0.082	-0.0916	0.0716	-0.0742	-0.0977	-0.1042.
Patescibacteria_Parcubacteria_uncultured Parcubacteria group bacterium_uncultured Parcubacteria group bacterium	0.0601	0.0768	0.0462	0.0824	0.0206	0.0786	-0.013	0.0446	-0.0409	0.0348	-0.048	-0.0743
Patescibacteria_Parcubacteria_uncultured soil bacterium_uncultured soil bacterium	-0.0244	0.0043	-0.1213.	-0.0103	-0.1027	-0.0307	0.148*	-0.0022	6e-04	0.0802	-0.0327	-0.0565
Patescibacteria_Saccharimonadia_Saccharimonadales_bacterium LWQ8	-0.0872	-0.009	-0.1059.	-0.0764	-0.124*	-0.1682**	0.1065.	-0.0854	0.0657	-0.0206	0.0359	0.1016
Patescibacteria_Saccharimonadia_Saccharimonadales_metagenome	0.0522	0.1016	-0.0158	0.0745	-0.0499	0.0546	0.1426*	0.0218	-0.0605	0.0851	-6e-04	-0.044
Patescibacteria_Saccharimonadia_Saccharimonadales_NA	-0.1612*	-0.2411***	-0.1929**	0.1179.	-0.1415*	-0.1364*	-0.0359	0.0044	0.1982**	-0.1149.	-0.1393*	-0.1112.
Patescibacteria_Saccharimonadia_Saccharimonadales_Saccharimonadaceae	0.0586	-0.0247	0.0143	0.0404	0.0299	-0.0612	0.0169	0.0641	-0.0065	-0.0117	0.0404	0.0873
Patescibacteria_Saccharimonadia_Saccharimonadales_Saccharum hybrid cultivar	-0.1443*	-0.1608*	-0.1216.	-0.1171.	-0.0851	-0.0878	-0.0542	-0.0519	0.1548*	-0.139*	-0.0525	-0.0397
Patescibacteria_Saccharimonadia_Saccharimonadales_soil bacterium WF55	-0.0898	-0.0925	-0.0638	-0.0638	-0.0117	0.0117	-0.1029	0.0092	0.0872	-0.0833	-0.0482	-0.0534
Patescibacteria_Saccharimonadia_Saccharimonadales_uncultured bacterium	-0.2718***	-0.2013**	-0.2999***	-0.2141***	-0.3119***	-0.2706***	0.2757***	-0.0693	0.1322*	0.064	-0.0971	-0.0645
Patescibacteria_Saccharimonadia_Saccharimonadales_uncultured bacterium SBR2096	-0.0931	-0.0854	-0.0528	-0.0911	-0.1143.	-0.1293*	0.0452	-0.0928	0.0496	0.023	0.0308	0.0437
Patescibacteria_Saccharimonadia_Saccharimonadales_uncultured candidate division WS5 bacterium	0.0872	0.0977	0.1029	-0.0117	0.0924	0.0664	-0.0638	-0.0589	-0.082	-0.0039	0.1055.	0.0664
Patescibacteria_Saccharimonadia_Saccharimonadales_uncultured Candidatus Saccharibacteria bacterium	-0.0898	-0.0925	-0.0638	-0.0638	-0.0117	0.0117	-0.1029	0.0092	0.0872	-0.0833	-0.0482	-0.0534
Patescibacteria_Saccharimonadia_Saccharimonadales_uncultured gamma proteobacterium	0.0236	-0.0171	-0.0254	0.127*	-0.0522	0.0211	0.0915	0.1291*	0.0223	-0.0394	-0.0342	-0.0224
Patescibacteria_Saccharimonadia_Saccharimonadales_uncultured prokaryote	-0.1055.	0.0169	-0.0716	-0.0794	-0.0872	-0.0951	0.0846	-0.0223	0.0039	0.0586	-0.0221	-0.0039
Patescibacteria_Saccharimonadia_Saccharimonadales_uncultured soil bacterium	-0.3076***	-0.0909	-0.2633***	-0.1685**	-0.4356***	-0.3594***	0.3434***	-0.1931**	0.1075.	0.1088.	-0.0234	-0.0244
Patescibacteria_Saccharimonadia_Saccharimonadales_wastewater metagenome	0.0618	-0.0244	0.0176	0.0647	0.0445	0.1879**	-0.013	0.0947	3e-04	-0.0174	-0.0118	-0.0771
Patescibacteria_uncultured_uncultured bacterium_uncultured bacterium	0.0504	0.0529	0.0734	0.0046	0.0674	-0.0188	0.0205	-0.0457	-0.051	0.0467	0.0911	0.1009
Patescibacteria_WWE3_bacterium CG2_30_40_12_bacterium CG2_30_40_12	-0.0378	-0.0117	-0.0794	0.0352	-0.0924	-0.1003	0.1029	0.0223	0.0404	0.0065	0.0039	-0.0091
Patescibacteria_WWE3_Candidatus Berkelbacteria bacterium RIFCSPHIGHO2_12_FULL_50_11_Candidatus Berkelbacteria bacterium RIFCSPHIGHO2_12_FULL_50_11	-0.0758	-0.0765	-0.0111	0.0505	-0.0079	-0.0213	-0.091	0.0242	0.0803	-0.1173.	-0.1278*	-0.1475*
Patescibacteria_WWE3_NA_NA	0.0606	0.0561	0.1118.	-0.0367	0.0565	-0.0126	-0.0062	-0.0978	-0.0932	0.0652	0.1364*	0.1251*
Patescibacteria_WWE3_uncultured bacterium_uncultured bacterium	0.0362	-0.0344	-0.0485	0.1574*	-0.0246	0.0344	0.0321	0.1544*	0.0124	0.0112	-0.1053.	-0.0939
Patescibacteria_WWE3_uncultured candidate division WWE3 bacterium_uncultured candidate division WWE3 bacterium	-0.0898	-0.0925	-0.0638	-0.0638	-0.0117	0.0117	-0.1029	0.0092	0.0872	-0.0833	-0.0482	-0.0534
PAUC34f_NA_NA_NA	-0.1412*	-0.063	-0.0499	-0.0323	-0.0469	-0.067	-0.077	-0.1283*	0.0678	-0.0362	-0.0676	-0.0939
PAUC34f_uncultured Deferribacteres bacterium_uncultured Deferribacteres bacterium_uncultured Deferribacteres bacterium	0.0753	0.048	0.0182	0.176**	0.0664	0.0627	-0.066	0.0486	0.0211	-0.0093	-0.0712	-0.0943
Planctomycetes_BD7-11_uncultured bacterium_uncultured bacterium	-0.2153***	-0.0823	-0.0487	-0.175**	-0.1084.	-0.1137.	-0.084	-0.1379*	0.0242	0.0401	-0.1483*	-0.1795**
Planctomycetes_BD7-11_uncultured Planctomycetaceae bacterium_uncultured Planctomycetaceae bacterium	0.034	-0.0528	0.0192	0.0863	-0.0251	0.0629	0.0036	0.1344*	0.0036	-0.0444	-0.0581	-0.0673
Planctomycetes_BD7-11_uncultured planctomycete_uncultured planctomycete	0.1055.	0.0742	-0.0039	0.0977	0.056	0.1055.	0.0247	0.1034	-0.0508	0.1055.	-0.0534	-0.0821
Planctomycetes_Brocadiae_Brocadiales_NA	0.1351*	0.0868	0.0068	0.1276*	0.034	0.0943	0.0098	0.0858	-0.0234	0.0838	-0.0098	-0.0491
Planctomycetes_Brocadiae_SM23-32_Planctomycetes bacterium SM23_32	0.1332*	0.1024	0.145*	0.0186	0.1282*	0.0351	-0.1452*	-0.0142	-0.0759	0.0234	0.0693	0.0875
Planctomycetes_Brocadiae_SM23-32_uncultured bacterium	-0.0247	-0.0195	0.0586	-0.0898	-0.0273	-0.0404	-0.0534	-0.0916	-0.0586	0.0898	0.0195	0.0274
Planctomycetes_NA_NA_NA	0.262***	0.3139***	0.2989***	0.1348*	0.2639***	0.0358	-0.1279*	-0.1604*	-0.2521***	0.1571*	0.1928**	0.1565*
Planctomycetes_OM190_metagenome_metagenome	0.0742	-0.0423	-0.0013	0.0767	0.0164	0.1236*	0.0416	0.2387***	0.0369	-0.0825	-0.1231.	-0.1266*
Planctomycetes_OM190_NA_NA	0.0184	-0.0943	-0.1763**	0.0623	-0.0734	0.0408	0.0337	0.334***	0.0786	0.0701	-0.2758***	-0.2958***
Planctomycetes_OM190_planctomycete A-2_planctomycete A-2	0.0792	0.0226	-0.0297	0.0617	0.0521	0.1475*	-4e-04	0.1568*	0.0045	0.0144	-0.1088.	-0.1334*
Planctomycetes_OM190_uncultured bacterium_uncultured bacterium	0.1423*	0.0012	-0.0638	0.0874	-0.02	0.0709	0.1669**	0.2342***	-0.0703	0.144*	-0.0984	-0.122.
Planctomycetes_OM190_uncultured Crater Lake bacterium CL500-15_uncultured Crater Lake bacterium CL500-15	0.1053.	0.1128.	0.2039**	-0.0197	0.1304*	0.0564	-0.1246*	-0.0351	-0.1597*	0.126*	0.0155	0.016
Planctomycetes_OM190_uncultured Planctomyces sp._uncultured Planctomyces sp.	0.0664	-0.0299	-0.0326	0.0482	0.0247	0.0794	0.0742	0.0641	-0.0352	0.0456	-0.0143	-0.03
Planctomycetes_OM190_uncultured soil bacterium_uncultured soil bacterium	-0.0834	0.0254	-0.103	-0.0581	-0.1872**	-0.1482*	0.1604*	-0.059	0.0215	0.08	-0.003	-0.0377
Planctomycetes_Phycisphaerae_CCM11a_groundwater metagenome	0.1337*	0.0954	-0.0048	0.1066.	0.0704	0.1446*	0.0099	0.1792**	-0.04	0.1006	-0.0929	-0.1057.
Planctomycetes_Phycisphaerae_CCM11a_NA	-0.0065	0.0273	-0.0091	0.0039	-0.0221	-0.0586	0.0299	-0.0916	-0.0091	0.0143	0.0378	0.0742
Planctomycetes_Phycisphaerae_CCM11a_uncultured bacterium	0.0445	0.0349	-0.0354	0.0493	-0.0603	-0.1017	0.0912	0.0107	0.0263	0.0464	0.0645	0.0646
Planctomycetes_Phycisphaerae_CCM11a_uncultured Planctomycetaceae bacterium	-0.0132	-0.0214	-0.0621	0.0921	-0.0741	-0.0998	0.0961	0.0401	0.0536	-0.0238	0.0421	0.0643
Planctomycetes_Phycisphaerae_CCM11a_uncultured planctomycete	0.1163.	0.0261	0.0298	0.0738	0.0925	0.0607	-0.0171	0.0741	-0.072	0.085	-0.0296	-0.0184
Planctomycetes_Phycisphaerae_DG-20_uncultured bacterium	0.1166.	0.0849	0.0665	0.0146	0.0775	-0.0232	-0.0269	-0.0441	-0.0672	0.0459	0.0853	0.1118.
Planctomycetes_Phycisphaerae_mle1-8_NA	0.0725	-0.0162	-9e-04	0.019	0.045	0.0038	-0.1022	0.0589	0.0029	0.0236	-0.0231	0.002
Planctomycetes_Phycisphaerae_mle1-8_uncultured bacterium	-0.065	0.0255	-0.0661	-0.0569	-0.1052.	-0.1129.	0.1629**	-0.0219	-0.0106	0.0639	0.0154	-0.0072
Planctomycetes_Phycisphaerae_mle1-8_uncultured bacterium mle1-8	0.1025	0.1045.	0.1636**	0.0314	0.1324*	0.083	-0.1117.	-0.0378	-0.1478*	0.1007	0.0732	0.0599
Planctomycetes_Phycisphaerae_mle1-8_uncultured bacterium UASB_TL4	-0.034	0.0247	-0.0363	-0.0492	-0.0851	-0.1347*	0.0327	-0.0944	0.0349	0.024	0.0295	0.035
Planctomycetes_Phycisphaerae_mle1-8_uncultured delta proteobacterium	0.0891	0.1365*	0.1711**	-0.0724	0.059	-0.0534	-0.0592	-0.1863**	-0.141*	0.0693	0.1304*	0.1434*
Planctomycetes_Phycisphaerae_mle1-8_uncultured organism	0.1291*	0.1557*	0.1425*	-0.0074	0.0971	0.0284	-0.0899	-0.0595	-0.1155.	0.0889	0.1033	0.0841
Planctomycetes_Phycisphaerae_mle1-8_uncultured Planctomycetales bacterium	0.0023	0.0739	-0.0216	-0.004	-0.0357	-0.0965	0.0557	-0.033	-0.0156	0.0635	0.0163	0.0283
Planctomycetes_Phycisphaerae_mle1-8_uncultured planctomycete	0.1054.	0.071	0.0379	0.0731	0.0733	0.0574	0.0096	0.0433	-0.072	0.0911	0.014	0.0398
Planctomycetes_Phycisphaerae_mle1-8_uncultured Schlesneria sp.	0.0682	0.0585	0.0833	-0.0438	0.0565	0.0355	0.0349	-0.0636	-0.1184.	0.1383*	0.0862	0.0562
Planctomycetes_Phycisphaerae_MSBL9_4572-13	0.1562*	0.1104.	0.1209.	0.0991	0.0753	0.0942	-0.0745	0.0572	-0.0247	0.0084	0.0975	0.1035
Planctomycetes_Phycisphaerae_MSBL9_GWC2-45-44	-0.0186	0.0535	0.0118	0.0898	-0.0131	-0.0476	0.0218	-0.1472*	0.0065	0.0334	0.0265	0.0044
Planctomycetes_Phycisphaerae_MSBL9_KCLunmb-38-53	0.1607*	0.1408*	0.1582*	0.0871	0.1255*	0.08	-0.1224.	0.0168	-0.1033	0.0758	0.0439	0.0591
Planctomycetes_Phycisphaerae_MSBL9_metagenome	0.1823**	0.1739**	0.264***	0.2017**	0.167**	0.1202.	-0.1254*	0.0623	-0.1645**	0.0527	0.0073	0.0475
Planctomycetes_Phycisphaerae_MSBL9_NA	-0.0821	-0.0638	-0.077	-0.0227	-0.137*	-0.1193.	0.0825	-0.0502	0.0985	-0.0624	0.039	0.0366
Planctomycetes_Phycisphaerae_MSBL9_SG8-4	0.475***	0.4061***	0.5511***	0.2675***	0.5211***	0.064	-0.261***	-0.2472***	-0.3719***	0.1289*	0.4259***	0.5056***
Planctomycetes_Phycisphaerae_MSBL9_SM23-30	0.0538	0.0183	-0.0245	0.0607	-0.0155	-0.0199	0.0268	0.0409	0.0206	0.0067	0.0432	0.0372
Planctomycetes_Phycisphaerae_MSBL9_ST-NAGAB-D1	-0.0392	-0.0337	-0.0166	-0.0654	0.009	0.0294	0.0283	-0.0282	-0.0049	0.0015	0.0078	0.0038
Planctomycetes_Phycisphaerae_NA_NA	-0.0637	-0.0013	-0.0163	-0.0296	-0.1012	-0.0533	0.0441	-0.0612	0.0129	0.0458	-0.0055	-0.0082
Planctomycetes_Phycisphaerae_Phycisphaerales_AKAU3564 sediment group	0.0968	0.2591***	0.1389*	-0.079	-0.0158	-0.1898**	0.1828**	-0.2608***	-0.2462***	0.266***	0.2535***	0.2**
Planctomycetes_Phycisphaerae_Phycisphaerales_Phycisphaeraceae	0.2117***	0.1955**	0.1014	0.0948	0.1671**	0.0699	0.0567	0.0514	-0.2151***	0.2274***	-0.0181	-0.0612
Planctomycetes_Phycisphaerae_Pla1 lineage_NA	0.1049.	0.1714**	0.1481*	0.0297	0.125*	0.0639	0.0024	-0.1038	-0.1339*	0.0934	0.1793**	0.15*
Planctomycetes_Phycisphaerae_Pla1 lineage_uncultured bacterium	-0.0782	-0.0782	-0.163**	-0.0331	-0.0827	-0.0245	0.0681	0.0745	0.1111.	-0.0182	-0.0606	-0.0505
Planctomycetes_Phycisphaerae_Pla1 lineage_uncultured soil bacterium	0.0398	0.0045	0.0469	0.1611*	0.0033	-0.0306	-0.027	-0.0072	0.0295	-0.0654	0.0472	0.0328
Planctomycetes_Phycisphaerae_Pla1 lineage_uncultured soil bacterium PBS-71	-0.0718	-0.0674	-0.0844	-0.0493	-0.0847	-0.0589	0.0297	0.0155	0.1087.	-0.0792	0.0207	0.0489
Planctomycetes_Phycisphaerae_S-70_NA	0.1055.	0.0742	-0.0039	0.0977	0.056	0.1055.	0.0247	0.1034	-0.0508	0.1055.	-0.0534	-0.0821
Planctomycetes_Phycisphaerae_S-70_uncultured bacterium	0.141*	0.1728**	0.0447	0.0234	0.015	-0.0878	0.1063.	-0.09	-0.1708**	0.2473***	0.108.	0.129*
Planctomycetes_Phycisphaerae_Tepidisphaerales_CPla-3 termite group	-0.1131.	0.1041.	-0.0693	-0.0301	-0.0927	-0.1535*	0.1399*	-0.2061***	-0.0259	0.1419*	0.0346	-0.0078
Planctomycetes_Phycisphaerae_Tepidisphaerales_Tepidisphaeraceae	-0.0495	-0.074	-0.0585	0.1036	-0.0779	-0.0143	-0.0175	0.0024	0.0981	-0.0984	-0.0637	-0.076
Planctomycetes_Phycisphaerae_Tepidisphaerales_WD2101 soil group	0.1895**	0.2634***	0.3444***	-0.022	0.0317	-0.2158***	0.2448***	-0.4187***	-0.4046***	0.3439***	0.4937***	0.5154***
Planctomycetes_Pla3 lineage_metagenome_metagenome	0.1113.	-0.047	0.0791	0.1001	0.0863	0.0973	-0.056	0.2026**	-0.055	0.0296	-0.1267*	-0.1008
Planctomycetes_Pla3 lineage_NA_NA	0.1684**	0.1235.	0.1488*	0.1227.	0.1737**	0.1868**	-0.1108.	0.0485	-0.082	0.0065	0.055	-0.0066
Planctomycetes_Pla3 lineage_uncultured bacterium_uncultured bacterium	0.0154	-0.0388	0.1235.	0.1241*	0.1062.	0.0711	-0.2318***	-0.0185	0.0132	-0.0812	-0.0676	-0.046
Planctomycetes_Pla3 lineage_uncultured planctomycete_uncultured planctomycete	0.0664	-0.0299	-0.0326	0.0482	0.0247	0.0794	0.0742	0.0641	-0.0352	0.0456	-0.0143	-0.03
Planctomycetes_Pla3 lineage_uncultured soil bacterium PBS-II-37_uncultured soil bacterium PBS-II-37	0.1353*	0.083	0.209***	0.0351	0.1772**	0.0504	-0.1583*	-0.0949	-0.1028	-0.0411	0.093	0.0828
Planctomycetes_Pla3 lineage_unidentified bacterium wb1_E15_unidentified bacterium wb1_E15	0.0906	0.0886	0.0997	0.026	0.1237*	0.0184	-0.12.	0.0039	-0.0776	0.0776	-0.0112	0.0166
Planctomycetes_Pla4 lineage_metagenome_metagenome	-0.0243	-0.1127.	-0.1583*	-0.0523	0.0036	0.0412	-0.004	0.1921**	0.0307	0.118.	-0.1799**	-0.1846**
Planctomycetes_Pla4 lineage_NA_NA	0.1791**	0.1325*	0.1496*	0.04	0.1327*	0.1412*	-0.0308	-0.0689	-0.1896**	0.163**	0.0936	0.0688
Planctomycetes_Pla4 lineage_uncultured bacterium_uncultured bacterium	0.034	0.176**	0.1003	-0.0131	0.1003	0.0048	-0.012	-0.1211.	-0.1399*	0.1676**	0.0209	-0.0118
Planctomycetes_Pla4 lineage_uncultured deep-sea bacterium_uncultured deep-sea bacterium	-0.0456	-0.0794	-0.0404	-0.0013	-0.0326	-0.0247	-0.0247	0.0641	0.0534	-0.0482	-0.0898	-0.0534
Planctomycetes_Pla4 lineage_uncultured organism_uncultured organism	-0.1107.	-0.0127	-0.0536	-0.0041	-0.0759	-0.1034	0.006	-0.1299*	0.0403	-0.0051	-0.0717	-0.0874
Planctomycetes_Pla4 lineage_uncultured Planctomycetaceae bacterium_uncultured Planctomycetaceae bacterium	0.1404*	0.0871	0.1188.	0.0728	0.102	-0.0199	-0.0869	-0.0227	-0.0451	-0.0098	0.1304*	0.1487*
Planctomycetes_Pla4 lineage_uncultured Planctomycetales bacterium_uncultured Planctomycetales bacterium	0.1114.	-0.0139	0.0396	0.0699	0.0581	0.1008	-0.0186	0.1439*	-0.0517	0.0789	-0.0451	-0.052
Planctomycetes_Pla4 lineage_uncultured planctomycete_uncultured planctomycete	0.0162	0.087	0.0359	0.0472	-0.0092	-0.0662	-0.0107	-0.0133	-0.0891	0.1502*	-0.0651	-0.1031
Planctomycetes_Pla4 lineage_uncultured prokaryote_uncultured prokaryote	-0.0977	-0.0728	-0.0698	-0.1142.	-0.1248*	0.0017	0.0165	0.003	0.0475	-0.0291	-0.0827	-0.1062.
Planctomycetes_Planctomycetacia_Gemmatales_Gemmataceae	-0.2481***	-0.1832**	-0.193**	-0.1801**	-0.3579***	-0.181**	0.2307***	0.0999	0.0434	0.1673**	-0.2783***	-0.3116***
Planctomycetes_Planctomycetacia_Isosphaerales_Isosphaeraceae	0.4819***	0.5089***	0.7712***	-0.037	0.5294***	0.171**	-0.2155***	-0.5368***	-0.6301***	0.3328***	0.5996***	0.5593***
Planctomycetes_Planctomycetacia_Pirellulales_Pirellulaceae	0.0231	0.024	-0.1686**	0.0513	-0.1345*	0.0661	0.1646**	0.2834***	0.0347	0.1163.	-0.2087***	-0.2436***
Planctomycetes_Planctomycetacia_Planctomycetales_NA	0.1564*	0.0646	0.022	0.1172.	0.1081.	0.1111.	5e-04	0.1208.	-0.0884	0.1309*	-0.0553	-0.0629
Planctomycetes_Planctomycetacia_Planctomycetales_Rubinisphaeraceae	0.0456	-0.0228	-0.0239	0.0852	-0.0439	0.0698	0.0176	0.0716	0.0139	0.0236	-0.0686	-0.1135.
Planctomycetes_Planctomycetacia_Planctomycetales_Schlesneriaceae	0.0425	-0.0413	0.008	0.1571*	-0.0729	0.1028	-0.0077	0.1715**	0.103	-0.1765**	-0.0159	0.0151
Planctomycetes_Planctomycetacia_Planctomycetales_uncultured	-0.4469***	-0.3503***	-0.5062***	-0.2593***	-0.4113***	-0.1986**	0.2386***	0.1138.	0.2545***	0.0809	-0.4283***	-0.481***
Planctomycetes_Planctomycetacia_uncultured_uncultured bacterium	0.0022	-0.1064.	-0.0648	-0.0265	-0.1142.	0.0505	0.1171.	0.119.	-0.0139	0.0731	-0.0679	-0.1048.
Planctomycetes_Planctomycetacia_uncultured_uncultured Planctomycetaceae bacterium	-0.0951	-0.0977	-0.0885	-0.0977	-0.069	0.0482	-0.0169	0.0092	0.0977	-0.1003	-0.0742	-0.0899
Planctomycetes_Planctomycetacia_uncultured_uncultured planctomycete	-0.0951	-0.0977	-0.0885	-0.0977	-0.069	0.0482	-0.0169	0.0092	0.0977	-0.1003	-0.0742	-0.0899
Planctomycetes_vadinHA49_bacterium 09.96.18_bacterium 09.96.18	0.043	0.0104	0.0091	0.0872	0.0013	-0.0326	0.0404	-0.0079	0.0299	-0.0534	0.0977	0.1055.
Planctomycetes_vadinHA49_bacterium UW 659-2-F09_bacterium UW 659-2-F09	0.1069.	0.0112	-0.0203	0.061	0.0737	0.0837	-0.0166	0.055	-0.0157	0.0649	-0.0547	-0.0695
Planctomycetes_vadinHA49_metagenome_metagenome	-0.0762	-0.0413	-0.0274	-0.1508*	-0.0507	-0.0667	-0.0141	-0.0734	-0.0045	0.054	-0.0511	-0.0387
Planctomycetes_vadinHA49_NA_NA	-0.1807**	-0.1772**	-0.1104.	-0.1779**	-0.0982	-0.0437	-0.1037	0.0829	0.1044.	-0.044	-0.2372***	-0.244***
Planctomycetes_vadinHA49_uncultured Antarctic bacterium LB3-13_uncultured Antarctic bacterium LB3-13	-0.0959	-0.0734	-0.032	-0.0528	-0.0176	-0.0214	-0.0186	-0.0678	0.0552	-0.0447	-0.0716	-0.0837
Planctomycetes_vadinHA49_uncultured bacterium_uncultured bacterium	0.0034	-0.0213	0.015	-0.0011	0.0215	0.0548	0.013	0.0357	-0.0049	-0.0126	-0.0224	-0.0284
Planctomycetes_vadinHA49_uncultured organism_uncultured organism	-0.0224	0.0222	-0.0299	-0.0389	-0.004	0.0538	-0.0047	-0.0057	0.0271	-0.0317	-2e-04	-0.0098
Planctomycetes_vadinHA49_uncultured Planctomycetales bacterium_uncultured Planctomycetales bacterium	-0.1031	-0.0973	-0.0594	-0.1996**	-0.0372	0.0842	7e-04	-0.0348	0.0634	-0.0817	-0.0384	-0.0761
Planctomycetes_vadinHA49_uncultured soil bacterium_uncultured soil bacterium	0.0198	0.0166	0.0309	-0.0348	0.0619	0.0428	-0.1083.	0.0085	-0.0075	0.0061	-0.0519	-0.0381
Poribacteria_uncultured Firmicutes bacterium_uncultured Firmicutes bacterium_uncultured Firmicutes bacterium	0.1323*	0.1014	0.1082.	0.0761	0.116.	0.0236	-0.0708	-0.015	-0.0691	0.0104	0.1013	0.1015
Proteobacteria_Alphaproteobacteria_Acetobacterales_Acetobacteraceae	-0.2894***	-0.2415***	-0.2069***	-0.0839	-0.2248***	-0.2188***	-0.0355	-0.1202.	0.229***	-0.0662	-0.1106.	-0.0882
Proteobacteria_Alphaproteobacteria_Acetobacterales_Acetobacterales Incertae Sedis	0.0772	0.0618	0.0577	0.1217.	0.099	-0.0658	-0.1241*	0.0233	-0.0396	0.0698	-0.0797	-0.0461
Proteobacteria_Alphaproteobacteria_Acetobacterales_NA	-0.069	-0.14*	-0.1177.	-0.0274	0.0302	0.1776**	-0.1253*	0.1478*	0.1428*	-0.1255*	-0.1662**	-0.1676**
Proteobacteria_Alphaproteobacteria_Azospirillales_Azospirillaceae	0.2988***	0.197**	0.3754***	0.114.	0.2004**	0.0722	-0.0293	-0.0787	-0.3352***	0.2737***	0.1864**	0.1899**
Proteobacteria_Alphaproteobacteria_Azospirillales_Azospirillales Incertae Sedis	0.0376	0.0199	-0.0067	0.1458*	0.0295	0.0039	-0.0092	0.0027	0.0292	-0.0127	-0.03	-0.0458
Proteobacteria_Alphaproteobacteria_Azospirillales_Inquilinaceae	-0.0818	0.0561	0.0581	-0.0966	-0.0346	-0.115.	-0.0735	-0.2669***	0.0135	-0.037	0.0769	0.0439
Proteobacteria_Alphaproteobacteria_Azospirillales_NA	0.0279	0.005	0.0957	-0.0481	0.0197	-0.0164	-0.0293	-0.0357	-0.066	0.0679	0.05	0.057
Proteobacteria_Alphaproteobacteria_Azospirillales_uncultured	0.0394	-0.0335	0.0551	-0.0237	-0.0311	0.0678	-0.0602	0.0944	-0.0568	0.0821	-0.082	-0.1016
Proteobacteria_Alphaproteobacteria_Caedibacterales_Caedibacteraceae	0.0813	0.0088	0.0653	0.0714	0.0039	-0.0202	-0.0675	0.0308	0.0122	-0.0319	0.049	0.0589
Proteobacteria_Alphaproteobacteria_Caulobacterales_Caulobacteraceae	-0.1472*	-0.0972	-0.0074	0.1686**	-0.3042***	-0.2507***	0.1781**	-0.2335***	0.1246*	-0.1103.	0.1373*	0.1514*
Proteobacteria_Alphaproteobacteria_Caulobacterales_Hyphomonadaceae	0.0219	-0.17**	-0.1266*	-0.0252	-0.0901	0.1703**	0.2131***	0.3589***	0.0061	0.0534	-0.2694***	-0.3075***
Proteobacteria_Alphaproteobacteria_Caulobacterales_Parvularculaceae	-0.1249*	-0.1249*	-0.0694	-0.1653**	-0.096	0.0329	-0.0504	-0.042	0.08	-0.065	-0.0752	-0.0889
Proteobacteria_Alphaproteobacteria_Dongiales_Dongiaceae	0.0562	-0.0813	-0.0832	0.0893	-0.0862	0.0594	0.1182.	0.3274***	0.0343	0.0273	-0.2051**	-0.2278***
Proteobacteria_Alphaproteobacteria_Elsterales_Elsteraceae	-0.0398	0.0518	-0.0439	-0.0768	-0.1172.	-0.0392	0.0876	-0.0909	0.0045	-1e-04	0.04	-0.0024
Proteobacteria_Alphaproteobacteria_Elsterales_NA	-0.0311	-0.0371	-0.0328	-0.0307	-0.1018	-0.0527	0.0501	-0.0354	0.0331	-0.0253	0.0331	0.0432
Proteobacteria_Alphaproteobacteria_Elsterales_uncultured	-0.0727	-0.0347	-0.1001	-0.1845**	-0.1641**	-0.1546*	0.2834***	0.0544	-0.126*	0.2974***	-0.0874	-0.0753
Proteobacteria_Alphaproteobacteria_Elsterales_URHD0088	-0.1904**	-0.0479	-0.122.	-0.0403	-0.1786**	-0.1921**	0.0726	-0.1141.	0.062	0.0287	-0.0758	-0.099
Proteobacteria_Alphaproteobacteria_Holosporales_Holosporaceae	0.0591	0.116.	0.1778**	0.1264*	0.1347*	0.0917	-0.169**	-0.0584	-0.0615	0.0196	-0.0389	-0.0702
Proteobacteria_Alphaproteobacteria_Micavibrionales_Micavibrionaceae	-0.1856**	0.0016	-0.2147***	-0.1227.	-0.2853***	-0.2569***	0.279***	-0.078	0.0201	0.162**	-0.0349	-0.0523
Proteobacteria_Alphaproteobacteria_Micavibrionales_uncultured	0.0648	-0.0451	-0.0182	0.0931	-0.0555	0.0871	0.089	0.1352*	0.0312	-0.0513	-0.0169	-0.0542
Proteobacteria_Alphaproteobacteria_Micropepsales_Micropepsaceae	-0.3383***	0.0736	-0.1398*	-0.269***	-0.1465*	-0.3368***	0.1604*	-0.4617***	-0.0885	0.3155***	-0.0085	-0.0862
Proteobacteria_Alphaproteobacteria_NA_NA	0.1974**	0.2328***	0.3602***	-0.1589*	0.2413***	0.0655	-0.1784**	-0.2526***	-0.3522***	0.3278***	0.1294*	0.0961
Proteobacteria_Alphaproteobacteria_Paracaedibacterales_Paracaedibacteraceae	-0.0355	0.0581	-0.0043	0.0504	-0.038	-0.0952	0.0021	-0.1435*	-0.0237	0.1208.	-0.0489	-0.0917
Proteobacteria_Alphaproteobacteria_Parvibaculales_Parvibaculaceae	-0.0177	0.0021	0.0312	0.0091	0.0273	-0.005	0.0109	-0.0579	-0.0104	-0.0182	-0.0083	-0.0203
Proteobacteria_Alphaproteobacteria_Reyranellales_Reyranellaceae	-0.0295	-0.2227***	0.0229	0.2163***	0.1173.	0.0997	-0.3472***	0.1534*	0.2437***	-0.2846***	-0.1617*	-0.0443
Proteobacteria_Alphaproteobacteria_Rhizobiales_A0839	-0.1169.	3e-04	-0.1771**	0.0429	-0.1801**	-0.1092.	0.2434***	-0.0293	-0.0285	0.2046**	-0.1787**	-0.242***
Proteobacteria_Alphaproteobacteria_Rhizobiales_Beijerinckiaceae	-0.2593***	-0.1964**	-0.3104***	0.0707	-0.068	0.098	-0.1742**	0.1996**	0.3459***	-0.2592***	-0.377***	-0.4282***
Proteobacteria_Alphaproteobacteria_Rhizobiales_Devosiaceae	-0.0212	-0.2079***	-0.1157.	0.0674	-0.1517*	0.0166	0.2231***	0.2881***	0.0664	-0.0285	-0.1571*	-0.1189.
Proteobacteria_Alphaproteobacteria_Rhizobiales_Hyphomicrobiaceae	-0.1969**	-0.1781**	-0.2916***	0.0836	-0.0582	0.0997	-0.0235	0.1533*	0.2706***	-0.2131***	-0.2044**	-0.2464***
Proteobacteria_Alphaproteobacteria_Rhizobiales_Kaistiaceae	-0.0632	-0.0148	-0.0534	0.0066	-0.133*	-0.1104.	0.0828	0.0325	0.0269	0.0271	0.0037	0.013
Proteobacteria_Alphaproteobacteria_Rhizobiales_KF-JG30-B3	-0.0271	0.1532*	-0.0682	-0.1176.	-0.132*	-0.0905	0.326***	-0.0588	-0.2418***	0.4635***	-0.0425	-0.115.
Proteobacteria_Alphaproteobacteria_Rhizobiales_Labraceae	0.0768	0.043	0.043	0.1055.	0.0169	0.0872	0.056	0.0641	-0.0273	-0.0247	0.0299	0.0117
Proteobacteria_Alphaproteobacteria_Rhizobiales_Methyloligellaceae	0.0182	-0.0579	0.0085	-0.1649**	-0.0612	-0.0178	-0.0067	0.132*	-0.041	0.1117.	-0.0958	-0.0928
Proteobacteria_Alphaproteobacteria_Rhizobiales_NA	0.0388	-0.0149	-0.034	0.0065	-0.0201	0.1524*	0.0855	0.1202.	0.0011	-0.016	-0.034	-0.0841
Proteobacteria_Alphaproteobacteria_Rhizobiales_Pleomorphomonadaceae	-0.1224.	-0.0937	-0.0637	-0.0752	-0.0375	0.0254	-0.0942	-0.0543	0.112.	-0.1199.	-0.1172.	-0.1323*
Proteobacteria_Alphaproteobacteria_Rhizobiales_Rhizobiaceae	-0.1158.	-0.3212***	-0.2243***	0.0342	-0.3019***	0.0359	0.1034	0.2771***	0.2639***	-0.195**	-0.2096***	-0.2025**
Proteobacteria_Alphaproteobacteria_Rhizobiales_Rhizobiales Incertae Sedis	0.0466	-0.0921	-0.1042.	0.2021**	-0.1181.	0.0383	0.0966	0.2259***	0.0811	-0.0041	-0.0988	-0.1243*
Proteobacteria_Alphaproteobacteria_Rhizobiales_Rhodomicrobiaceae	0.1437*	0.3257***	0.2049**	-0.0833	0.0579	-0.2579***	0.164**	-0.3234***	-0.3077***	0.3207***	0.3823***	0.3879***
Proteobacteria_Alphaproteobacteria_Rhizobiales_uncultured	-0.2229***	0.0177	-0.2564***	-0.0797	-0.2241***	-0.2575***	0.3592***	-0.0534	-0.0157	0.2245***	-0.0811	-0.1255*
Proteobacteria_Alphaproteobacteria_Rhizobiales_Xanthobacteraceae	-0.1727**	0.0326	-0.0994	-0.1102.	0.0083	-0.2414***	0.0786	-0.3494***	0.0068	0.0786	0.225***	0.2709***
Proteobacteria_Alphaproteobacteria_Rhodobacterales_Rhodobacteraceae	0.0778	0.0907	0.1376*	-0.0656	0.1923**	0.2437***	-0.2249***	-0.0197	-0.0195	-0.039	0.0087	-0.0171
Proteobacteria_Alphaproteobacteria_Rhodospirillales_Magnetospiraceae	0.1278*	0.0325	0.0521	0.0531	0.0838	0.0941	0.0093	0.1191.	-0.1024	0.1378*	-0.0514	-0.061
Proteobacteria_Alphaproteobacteria_Rhodospirillales_Magnetospirillaceae	-0.1269*	-0.1084.	-0.1131.	-0.0738	-0.0453	-0.015	-0.0546	-0.0034	0.1397*	-0.1236.	-0.0845	-0.084
Proteobacteria_Alphaproteobacteria_Rhodospirillales_Rhodopirillaceae	0.3257***	0.1748**	0.3384***	-0.043	0.183**	-0.1389*	-0.1183.	-0.3145***	-0.1829**	0.082	0.5047***	0.568***
Proteobacteria_Alphaproteobacteria_Rhodospirillales_Rhodospirillaceae	0.0286	0.0725	-0.0436	0.1371*	-0.1367*	-0.1139.	0.2663***	-0.0049	-0.0625	0.1375*	0.0414	0.0141
Proteobacteria_Alphaproteobacteria_Rhodospirillales_uncultured	-0.1528*	0.0425	-0.2563***	-0.1004	-0.2478***	-0.1744**	0.3527***	-0.0815	0.0126	0.2157***	-0.0203	-0.0759
Proteobacteria_Alphaproteobacteria_Rhodovibrionales_Fodinicurvataceae	0.1836**	0.1181.	0.0389	0.2043**	0.0737	0.194**	0.081	0.1689**	-0.0788	0.0823	-0.0242	-0.0715
Proteobacteria_Alphaproteobacteria_Sneathiellales_Sneathiellaceae	0.1219.	0.0564	0.0083	0.082	0.0615	0.1565*	0.0072	0.1882**	-0.0657	0.1449*	-0.1036	-0.1512*
Proteobacteria_Alphaproteobacteria_Sphingomonadales_Sphingomonadaceae	0.0193	-0.2617***	-0.1626**	0.264***	-0.3171***	0.0791	0.2208***	0.2727***	0.2633***	-0.2453***	-0.0233	-0.0549
Proteobacteria_Alphaproteobacteria_Thalassobaculales_uncultured	0.276***	0.2462***	0.2925***	0.0431	0.3354***	0.2049**	-0.2263***	0.0231	-0.2857***	0.2315***	0.0372	0.005
Proteobacteria_Alphaproteobacteria_Tistrellales_Geminicoccaceae	0.0295	-0.1081.	-0.0596	0.0102	-0.0517	0.2624***	-0.027	0.2325***	0.0794	-0.0924	-0.1722**	-0.2292***
Proteobacteria_Alphaproteobacteria_Tistrellales_Tistrellaceae	-0.1003	-0.0065	-0.0885	-0.0846	-0.0846	-0.1055.	0.082	0.0092	0.0091	0.0612	-0.0326	-0.0247
Proteobacteria_Alphaproteobacteria_uncultured_alpha proteobacterium LWH5	0.0366	-0.0713	-0.0255	0.0268	0.0042	0.165**	-0.0926	0.2573***	0.051	-0.0897	-0.2145***	-0.1953**
Proteobacteria_Alphaproteobacteria_uncultured_bacterium Ellin6089	-0.0411	-0.1337*	0.0242	-0.0798	-0.0211	-0.0872	-0.0701	-0.0648	0.0842	-0.0719	0.0473	0.1171.
[truncated: 714 more rows]

## Sheet: Genus
Bacteria	Ca	CEC	Clay	K	Mg	Na	P2O5	pH	Sand	Silt	SOM	TN
[truncated: 3,367 more rows]
