# Supplementary material for: Compositional Shift of Bacterial, Archaeal, and Fungal Communities Is Dependent on Trophic Lifestyles in Rice Paddy Soil
Source: Front Microbiol. 2021 Sep 1;12:719486. doi: 10.3389/fmicb.2021.719486 (PMC8440912; doi:10.3389/fmicb.2021.719486)
Supplement: Supplementary file 1 [file Data_Sheet_1.zip › Table 6.XLSX]

## Sheet: Sheet1
Supplementary Table 6. Correlation between diversity indices and edaphic factors
Bacteria
ρ (Rho)	pH	SOM1	TN2	CEC3	Ca	Mg	K	Na	P2O5	Sand	Silt	Clay
Observed OTU	0.058201	-0.131713	-0.20731	-0.0212146	0.0627519	-0.0836535	0.0807738	0.096733	-0.0265945	-0.026662	0.105171	0.0362285
Shannon	0.189835	-0.332087	-0.305976	-0.255847	-0.126104	-0.217156	-0.0173339	-0.0621069	0.0206558	0.110343	0.0343853	-0.165598
Simpson	0.0804372	-0.250279	-0.122711	-0.329578	-0.358226	-0.183012	-0.245434	-0.220482	0.0342718	0.178927	-0.118011	-0.243357
p value	pH	SOM	TN	CEC	Ca	Mg	K	Na	P2O5	Sand	Silt	Clay
Observed OTU	0.357521	0.0366546	0.000930899	0.737524	0.321109	0.18561	0.201264	0.125634	0.674376	0.673596	0.0957413	0.567025
Shannon	0.00247711	6.68202e-08	7.33209e-07	3.95884e-05	0.0455132	0.000517328	0.784223	0.326118	0.744194	0.0804153	0.586925	0.00844055
Simpson	0.203155	5.88378e-05	0.0516971	8.49511e-08	4.80426e-09	0.00355178	8.245e-05	0.000421672	0.588162	0.00438165	0.0614006	9.50893e-05
Archaea
ρ (Rho)	pH	SOM	TN	CEC	Ca	Mg	K	Na	P2O5	Sand	Silt	Clay
Observed OTU	-0.146184	0.0591366	0.0790286	0.133495	-0.0714996	-0.107754	0.122624	-0.361018	0.141934	0.00381878	0.0913588	-0.108162
Shannon	0.026112	-0.165497	-0.0797536	-0.133518	-0.281887	-0.278081	0.0497287	-0.447353	0.184914	0.231638	-0.0801251	-0.365909
Simpson	0.292603	-0.364917	-0.280349	-0.453877	-0.360639	-0.329536	-0.0328494	-0.16219	0.09799	0.467217	-0.365335	-0.506174
p value	pH	SOM	TN	CEC	Ca	Mg	K	Na	P2O5	Sand	Silt	Clay
Observed OTU	0.020257	0.349832	0.211205	0.0341652	0.258129	0.087819	0.0518645	3.57471e-09	0.0242371	0.951901	0.148152	0.0866175
Shannon	0.679954	0.00848113	0.207033	0.0341339	5.49167e-06	7.42413e-06	0.431879	8.37108e-14	0.00321627	0.00020772	0.204918	2.115e-09
Simpson	2.29356e-06	2.35438e-09	6.20631e-06	3.28626e-14	3.72178e-09	8.52961e-08	0.60375	0.00990918	0.120771	4.44089e-15	2.25055e-09	0
Fungi
ρ (Rho)	pH	SOM	TN	CEC	Ca	Mg	K	Na	P2O5	Sand	Silt	Clay
Observed OTU	-0.0437234	0.135578	0.0956801	0.285423	0.414862	0.332889	0.305114	0.105768	-0.0159607	-0.374323	0.301363	0.364086
Shannon	-0.0931034	0.199439	0.19084	0.22224	0.266135	0.166536	0.136758	-0.102505	0.134659	-0.332864	0.291195	0.267086
Simpson	0.00761332	0.0515757	0.0434232	-0.0986487	-0.148414	-0.178851	-0.0956967	-0.144077	0.131301	0.111102	-0.128199	-0.106677
p value	pH	SOM	TN	CEC	Ca	Mg	K	Na	P2O5	Sand	Silt	Clay
Observed OTU	0.489586	0.031438	0.129823	4.13328e-06	6.65645e-12	6.1853e-08	7.90526e-07	0.0938612	0.800945	8.39773e-10	1.09366e-06	2.57456e-09
Shannon	0.140529	0.00146116	0.00234672	0.000378027	1.85873e-05	0.00807174	0.0299776	0.104504	0.0326181	6.20006e-08	2.5777e-06	1.73045e-05
Simpson	0.904278	0.414952	0.492576	0.118282	0.0184055	0.00439874	0.129756	0.022153	0.0372513	0.0783446	0.0420147	0.0910579
1SOM, soil organic matters
2TN, total nitrogen
3CEC, Cation exchange capacity
