# Supplementary material for: Compositional Shift of Bacterial, Archaeal, and Fungal Communities Is Dependent on Trophic Lifestyles in Rice Paddy Soil
Source: Front Microbiol. 2021 Sep 1;12:719486. doi: 10.3389/fmicb.2021.719486 (PMC8440912; doi:10.3389/fmicb.2021.719486)
Supplement: Supplementary file 1 [file Data_Sheet_1.zip › Table 7.XLSX]

## Sheet: Content
Supplementary Table 7. Taxonomic information and relative abundances of putative oligo- and copiotrophs in soil microbial communities
Sheet	Content
Bacteria	Taxonomic information and relative abundances of bacterial oligo- and copiotrophs
Archaea	Taxonomic information and relative abundances of archaeal oligo- and copiotrophs
Fungi	Taxonomic information and relative abundances of fungal oligo- and copiotrophs

## Sheet: Bacteria
										Relative abundance
OTU	Kingdom	Phylum	Class	Order	Family	Genus	Species	OTU_id	Category	CC1	CC1.18	CC2	CC2.18	CJ1	CJ1.18	CJ2	CJ2.18	DG1	DG1.18	DG2	DG2.18	IS1	IS1.18	IS2	IS2.18	JJ1	JJ2	MY1	MY2	NJ1	NJ2	UF1	UF1.18	UF2	UF2.18	YS1	YS2
0020e98dfcaae593f9c1075bff258bd6	Bacteria	Cloacimonetes	Cloacimonadia	Cloacimonadales	PBS-18	#N/A	#N/A	B6430_f_PBS-18	Copiotroph	0	0	0	0	0	0	0	0	8.64961e-05	8.59509e-05	0	0	4.50882e-05	0	3.94552e-05	0	0	3.41556e-05	0	0	0	0	0	0	0	0	0	0
0080a0511adb4be458158b10137971fa	Bacteria	BRC1	#N/A	#N/A	#N/A	#N/A	#N/A	B10323_o_NA	Copiotroph	0	0	0	0	0	0	0	0	0	2.19091e-05	0	0	0	2.5597e-05	0	0	0	0	2.08283e-05	0	1.78276e-05	0	2.83316e-05	0	0	0	0	0
02246285d60a6e195e2072cf75782f87	Bacteria	Planctomycetes	#N/A	#N/A	#N/A	#N/A	#N/A	B8877_o_NA	Copiotroph	0	0	0	0	0	0	0	0	4.20792e-05	0	0	9.72688e-05	0	0	0	0	0	0	0	0	0	0	0	0	0	0	0	0
0226366d147c5730bd8108f1c39457f4	Bacteria	Planctomycetes	Planctomycetacia	Isosphaerales	Isosphaeraceae	uncultured	#N/A	B7255_uncultured	Copiotroph	0	0	0	0	0	0	0	0	0	0	0.000261369	0	0	0	0	0	0	0	0	0	0	0	0	0	0	0	0	0
02ceeabe36c24c0210e0cb15877789fa	Bacteria	Bacteroidetes	Ignavibacteria	Kryptoniales	MSB-3C8	#N/A	#N/A	B7203_f_MSB-3C8	Copiotroph	1.16717e-05	2.71684e-05	0	0	0	0	0	0	4.67546e-05	0	2.37608e-05	0	6.08691e-05	0	0	0	0	2.73245e-05	0	0	0	0	5.23044e-05	0	0	0	0	0
035912e7874635f19ba29bd20736a555	Bacteria	Chloroflexi	Ktedonobacteria	Ktedonobacterales	JG30-KF-AS9	uncultured bacterium	uncultured bacterium	B2977_uncultured bacterium	Copiotroph	0	0	0	0	0	0	0	0	0	0	0	0	0.000480189	8.04477e-05	0.000188821	0	0	0	0	0	0	0	0	0	0	0	0.000316425	0
0363ea720e6ea642d6a8d3ff956d9f5e	Bacteria	Proteobacteria	Gammaproteobacteria	#N/A	#N/A	#N/A	#N/A	B8653_o_NA	Copiotroph	0	0	0	0	0	0	0	0	0	0	0	0	7.21411e-05	3.29104e-05	8.45468e-05	0	0	0	0	0	0	0	0	0	0	0	0	0
03b5fad320677582d6fc4d4dd3ab8a95	Bacteria	Patescibacteria	Gracilibacteria	uncultured bacterium	uncultured bacterium	uncultured bacterium	uncultured bacterium	B19619_uncultured bacterium	Copiotroph	0	0	0	0	0	0	0	0	0	0	0	0	1.35265e-05	0	0	0	0	0	0	0	0	0	0	0	0	0	0	0
040e9ba998ce93f665dc837320532cca	Bacteria	Chloroflexi	Anaerolineae	SBR1031	uncultured bacterium	uncultured bacterium	uncultured bacterium	B5111_uncultured bacterium	Copiotroph	0	0	0	0	0	0	0	0	0.000156628	0	6.17781e-05	0	0	5.1194e-05	0.000169094	0	0	0	0	0	0	0	0	0	3.92515e-05	0	0	0
041ad81d28162a55b67e20f62ee919b3	Bacteria	Proteobacteria	Deltaproteobacteria	Desulfovibrionales	Desulfovibrionaceae	Desulfovibrio	#N/A	B5938_Desulfovibrio	Copiotroph	0	0	2.26624e-05	0	0	0	0	0	0	0	0	3.18639e-05	0.000101448	0	5.91828e-05	4.22025e-05	0	0	5.32279e-05	3.56563e-05	0	0	0	0	0	0	0	0
0454748e057e5f1b2af8be8b51ae7c38	Bacteria	Gemmatimonadetes	Gemmatimonadetes	Gemmatimonadales	Gemmatimonadaceae	Gemmatimonas	#N/A	B251_Gemmatimonas	Copiotroph	0	0	0	0	0.000396366	0.00062106	0	0	0.0011525	0.000738167	0.00172741	0.00250886	0.00018937	0.000298022	0.00113011	0.00169769	0.00136557	0	0.00085859	0.000646008	0.000206291	0.000116682	0.00106134	0.0013557	0.00132801	0.00181541	0	0.00258338
046ede05428ea6755e69661d7567273b	Bacteria	Planctomycetes	Phycisphaerae	MSBL9	SG8-4	#N/A	#N/A	B12071_f_SG8-4	Copiotroph	0	0	0	0	0	0	0	0	0	0	1.66326e-05	8.38524e-06	0	0	0	0	0	0	0	0	1.01872e-05	5.26213e-05	0	0	0	0	0	0
04836cb2cc46fb877abde5488604fdd6	Bacteria	Proteobacteria	Deltaproteobacteria	Syntrophobacterales	Syntrophobacteraceae	Syntrophobacter	#N/A	B258_Syntrophobacter	Copiotroph	0	0	0.000254322	0.000806047	0	0	0	0	0.000780803	0.000591544	0.000795987	0.000290129	0.00162318	0.000934291	0.00376515	0.00202764	0.000161386	0.00193093	0.00183058	0.00128572	0	0	0.00242344	0.00160531	0.000830824	0.000943335	0	0.000127785
057523a871554588c72fc4a3d343b49b	Bacteria	Proteobacteria	Deltaproteobacteria	SAR324 clade(Marine group B)	#N/A	#N/A	#N/A	B18423_o_SAR324 clade(Marine group B)	Copiotroph	0	0	0	0	0	0	0	0	1.16887e-05	0	9.50433e-06	0	0	0	0	0	0	0	0	0	0	0	0	0	0	0	0	0
057f8789d633cd574753e65db59c3635	Bacteria	Planctomycetes	Pla4 lineage	#N/A	#N/A	#N/A	#N/A	B9319_o_NA	Copiotroph	0	0	0	0	0	0	0	0	0	0	0	0	0	4.93657e-05	0.000118366	0	0	0	0	0	0	0	0	0	0	0	0	0
05f0d52e5bcf9feafe2823ee77435711	Bacteria	Latescibacteria	uncultured bacterium	uncultured bacterium	uncultured bacterium	uncultured bacterium	uncultured bacterium	B1130_uncultured bacterium	Copiotroph	6.76958e-05	0	0.000105758	5.47432e-05	0.000296081	0	0.000109453	0	0.000163641	7.41537e-05	0.000144941	0	0.000529786	0.000725858	7.04557e-05	0.000285826	0	0	0.000115713	0.00013843	0	0.000265395	0.000185245	6.36251e-05	0.000187535	0.000111979	0.000127449	0
0657b190029301952e101c1adea5f9f5	Bacteria	Planctomycetes	Phycisphaerae	MSBL9	SG8-4	#N/A	#N/A	B1088_f_SG8-4	Copiotroph	0	6.98617e-05	0	0	9.31221e-05	8.03725e-05	1.53234e-05	0	0.000194032	0.000458405	0.000171078	0.000620508	0.000252494	0.000126157	0.000186003	0.000189911	0	2.73245e-05	3.00853e-05	0	0.000613778	0.000924305	1.52555e-05	0	0	0	0	0
06b6fef5fe9422f4e86006bd631158cd	Bacteria	Chloroflexi	Anaerolineae	Anaerolineales	Anaerolineaceae	#N/A	#N/A	B9320_f_Anaerolineaceae	Copiotroph	0	0	0	0	0	0	0	0	0	0	0	0	0.000155554	0	0	0	0	0	0	0	0	0	0	0	0	0	0	0
078e8c4037faaf7df3275d76857f958c	Bacteria	Zixibacteria	uncultured candidate division TA06 bacterium	uncultured candidate division TA06 bacterium	uncultured candidate division TA06 bacterium	uncultured candidate division TA06 bacterium	uncultured candidate division TA06 bacterium	B2139_uncultured candidate division TA06 bacterium	Copiotroph	0	0	0	0	0	0	0	0	0	0	0	0	0.000344925	0.000265112	0.00039737	0.000257052	0	0	0	0	0.000290335	4.34698e-05	0	0	0	0	0.000125252	0
07bf28ef246562b89027cf74e6862fbc	Bacteria	Verrucomicrobia	Verrucomicrobiae	Chthoniobacterales	Chthoniobacteraceae	LD29	#N/A	B7908_LD29	Copiotroph	0	0	0	0	0	0	0	0	0	5.22447e-05	0	0	3.8325e-05	0	8.17286e-05	0	0	0	4.16566e-05	0	0	0	0	0	0	0	0	0
08f38661afb033773150da4bfe6bf5b2	Bacteria	Proteobacteria	Deltaproteobacteria	Myxococcales	Haliangiaceae	Haliangium	#N/A	B7869_Haliangium	Copiotroph	0	0	0	0	0	0	0	0	0	0	0	0	0	0	0	0	0	0	0	0	0	0	0.000209218	0	0	0	0	0
0bf76821ed499739fb09b8a5ee542fe0	Bacteria	Verrucomicrobia	Verrucomicrobiae	Pedosphaerales	Pedosphaeraceae	#N/A	#N/A	B11032_f_Pedosphaeraceae	Copiotroph	0	0	0	0	0	0	0	0	0	0	0	0	0	0	0	0	0	0	0	0	0	0	0.000104609	0	0	0	0	0
0c51bde826722d690992dc738814a2d9	Bacteria	Proteobacteria	Deltaproteobacteria	#N/A	#N/A	#N/A	#N/A	B17087_o_NA	Copiotroph	7.00301e-06	0	0	0	0	0	0	0	0	3.37062e-06	4.75216e-06	0	0	0	8.45468e-06	5.75489e-06	0	0	0	0	0	0	0	0	0	0	0	0
0c77da80e68964e2918e3eb4f48b4ff2	Bacteria	Elusimicrobia	Endomicrobia	Endomicrobiales	Endomicrobiaceae	Candidatus Endomicrobium	metagenome	B1699_Candidatus Endomicrobium	Copiotroph	3.96837e-05	0	0	0	0	0	7.44281e-05	0	0	0	4.27695e-05	0	0.000568111	7.31343e-05	0.000656647	0	0	0.000136623	0	0	0.000203744	0.000171591	0.000154734	0	0	0	0.00020216	9.58387e-05
0d08fd761cff7dcbf6d4c314fc5cd51c	Bacteria	Planctomycetes	Planctomycetacia	Isosphaerales	Isosphaeraceae	uncultured	#N/A	B7229_uncultured	Copiotroph	0	0	0	0	0	0	0	0	0	0	0	0	0.000223187	0	0	0	0	0	2.77711e-05	0	0	0	0	0	0	0	0	0
0ddaf5bad1b8611f0b7fc09bf11bdf5d	Bacteria	#N/A	#N/A	#N/A	#N/A	#N/A	#N/A	B7257_o_NA	Copiotroph	0	0	0	0	0	0	0	0	3.03905e-05	0	5.46499e-05	0.000107331	0	0	0	0	0	0	0	0	0	0	2.17935e-05	0	0	0	0	0
0e141c9e4f3e6e4cf1a7090fca567d8a	Bacteria	Firmicutes	Negativicutes	Selenomonadales	Veillonellaceae	#N/A	#N/A	B13011_f_Veillonellaceae	Copiotroph	0	0	0	0	0	0	0	0	5.37678e-05	0	0	0	2.02897e-05	0	0	0	0	0	0	0	0	0	0	0	0	0	0	0
0e75eee8ec040695e282c6f7a038212a	Bacteria	Proteobacteria	Deltaproteobacteria	Myxococcales	Haliangiaceae	Haliangium	#N/A	B2252_Haliangium	Copiotroph	0	8.92677e-05	0	0	0	0	0.000131344	0	0.000479235	0	0	0	0.000358451	0	8.45468e-05	0	0	0.000229981	0	0.000180379	0	5.49092e-05	0	0	0	0	0	0
0e781bedbba34c418a8df94f7de66770	Bacteria	Proteobacteria	Deltaproteobacteria	Myxococcales	Polyangiaceae	Pajaroellobacter	#N/A	B6756_Pajaroellobacter	Copiotroph	0	0	0	0	0	0	0	0	0	0	0	4.19262e-05	0	0	0	0	0	0	0	0	0	0	0.000217935	0	0	0	0	0
0e9c7265b769f127950cbd8a8d68ae97	Bacteria	#N/A	#N/A	#N/A	#N/A	#N/A	#N/A	B8925_o_NA	Copiotroph	0	0	0	0	0	0	0	0	0	0	0	0	0.000101448	2.37686e-05	1.40911e-05	0	0	0	0	2.51692e-05	0	0	0	0	0	0	0	0
0ee3ab0349ac6f049ebadb7f3aff6fb8	Bacteria	Planctomycetes	Phycisphaerae	DG-20	uncultured bacterium	uncultured bacterium	uncultured bacterium	B15727_uncultured bacterium	Copiotroph	0	0	0	0	0	0	0	0	1.16887e-05	0	1.18804e-05	1.34164e-05	0	0	0	0	0	0	0	0	0	0	0	0	0	0	0	0
0fd877ab7ec466b11d6125f5f8f0af55	Bacteria	Chlamydiae	Chlamydiae	Chlamydiales	Parachlamydiaceae	#N/A	#N/A	B8125_f_Parachlamydiaceae	Copiotroph	0	0	0	0	0	0	0	0	0	0	0	0	7.43955e-05	0	4.50916e-05	7.86501e-05	0	0	0	0	0	0	0	0	0	0	0	0
1052ed3ad2dda5aa11e87b32f2b4c170	Bacteria	Chloroflexi	Anaerolineae	RBG-13-54-9	#N/A	#N/A	#N/A	B1380_o_RBG-13-54-9	Copiotroph	0	0	0	0	0	0	0	0	0	0	0	0	0.000820605	0.00121951	0	0.00068675	0	0	0	0	0	0	0	0	0	0	0	0
105611ce3615e963857e111c2559be80	Bacteria	Chloroflexi	Anaerolineae	SBR1031	A4b	#N/A	#N/A	B7910_f_A4b	Copiotroph	0	0	0	0	0	0	0	0	6.77942e-05	0	6.65303e-05	0	0	0	0	0	0	0	8.79418e-05	0	0	0	0	0	0	0	0	0
106c9bb8d06c18177242c5f547adc625	Bacteria	Nitrospirae	Thermodesulfovibrionia	uncultured	uncultured prokaryote	uncultured prokaryote	uncultured prokaryote	B409_uncultured prokaryote	Copiotroph	0	0	0	0	0	0	0	0	0	0	0	0	0.00460351	0.00311552	0.00418225	0.00215233	0	0	0	0	0	0	0	0	0	0	0	0
1071e1a670987bc5bc926184cf767fdd	Bacteria	Patescibacteria	Parcubacteria	Candidatus Jorgensenbacteria	Candidatus Adlerbacteria bacterium GW2011_GWC1_50_9	Candidatus Adlerbacteria bacterium GW2011_GWC1_50_9	Candidatus Adlerbacteria bacterium GW2011_GWC1_50_9	B18434_Candidatus Adlerbacteria bacterium GW2011_GWC1_50_9	Copiotroph	0	0	0	0	0	0	0	0	0	0	4.75216e-06	0	0	0	1.97276e-05	0	0	0	0	0	0	0	0	0	0	0	0	0
11962b14f7b3247088a932d04e712fa0	Bacteria	Proteobacteria	Deltaproteobacteria	Oligoflexales	0319-6G20	uncultured Syntrophobacteraceae bacterium	uncultured Syntrophobacteraceae bacterium	B14798_uncultured Syntrophobacteraceae bacterium	Copiotroph	0	0	1.76263e-05	0	0	0	0	0	0	0	0	0	9.01764e-06	0	0	0	0	0	0	0	0	0	2.39729e-05	0	0	0	0	0
11fa6260153f3233fa8a33faa214b20b	Bacteria	Chloroflexi	Anaerolineae	SBR1031	uncultured soil bacterium	uncultured soil bacterium	uncultured soil bacterium	B7632_uncultured soil bacterium	Copiotroph	0	0	0	0	0	0	0	0	4.44169e-05	0	3.32651e-05	8.21753e-05	0	0	0	0	0	0	4.39709e-05	0	0	0	0	0	0	0	0	0
1243d4918ae6156b5df05f45a90f1011	Bacteria	Proteobacteria	Alphaproteobacteria	#N/A	#N/A	#N/A	#N/A	B9667_o_NA	Copiotroph	0	0	0	0	0	0	0	0	3.03905e-05	0	2.61369e-05	0	2.70529e-05	0	0	0	0	0	0	2.09743e-05	3.31084e-05	1.14394e-05	0	0	0	0	0	0
12ccf787cfd22c4fa523fcfb99c896ee	Bacteria	Proteobacteria	Deltaproteobacteria	Desulfarculales	Desulfarculaceae	Desulfatiglans	#N/A	B6122_Desulfatiglans	Copiotroph	0	0	0	0	0	0	0	0	0	0	0	0	0.000119484	0	0.000140911	0	0	0	0.000104142	0	0	0	0	0	0	0	0	0
131ebfdcd3f3d8e91b142df999fff738	Bacteria	Chloroflexi	Ktedonobacteria	Ktedonobacterales	Ktedonobacteraceae	FCPS473	uncultured Ktedonobacter sp.	B2663_FCPS473	Copiotroph	0	0	0	0	0	0	0	0	0	0	0	0	0.000193879	0.000292537	0.000132457	0.000163055	0	0	0	0.000281056	3.56552e-05	2.97425e-05	0	0	3.70709e-05	0	0	0
13c6eacae0fdacef9e9089f165f29703	Bacteria	Armatimonadetes	Fimbriimonadia	Fimbriimonadales	Fimbriimonadaceae	metagenome	metagenome	B1246_metagenome	Copiotroph	0.000233434	0.000116436	0	0	0.000140877	0	0	0	3.97414e-05	0.000337062	0.000282754	0.000565165	0.000198388	0	0.000448098	7.48135e-05	0	0.000218596	0.000573936	0	0	0	0	2.44712e-05	9.15869e-05	0	0	0
148cac40ee3fbac94ff2fdce596e0504	Bacteria	Spirochaetes	Spirochaetia	Spirochaetales	Spirochaetaceae	Spirochaeta 2	uncultured Spirochaetes bacterium	B931_Spirochaeta 2	Copiotroph	0	0	0	0	3.58162e-05	0.000226504	1.09453e-05	0.000129902	0.000308581	0.00029493	0.000335027	0.000689267	0.000234459	5.66791e-05	0.000183185	0.000445045	0.000490365	5.0095e-05	0	0	0.000336177	0.000695517	0	0	0	0	0.000241714	0.000134174
14ba42b1a7a5dc71fcfdd22d8b584624	Bacteria	Planctomycetes	Planctomycetacia	Isosphaerales	Isosphaeraceae	uncultured	uncultured Isosphaera sp.	B9753_uncultured	Copiotroph	0	0	0	0	0	0	0	0	0	0	0	0	0.000142028	0	0	0	0	0	0	0	0	0	0	0	0	0	0	0
14e84571b4e4ef882f23c65695ca2287	Bacteria	#N/A	#N/A	#N/A	#N/A	#N/A	#N/A	B7765_o_NA	Copiotroph	0	0	0	0	0	0	0	0	1.63641e-05	0	2.13847e-05	5.03114e-06	2.25441e-05	1.82836e-05	6.76375e-05	0	0	0	0	0	0	0	3.26903e-05	1.79455e-05	0	0	1.97766e-05	0
151d5e81e49602aca78f11e03f3fff08	Bacteria	#N/A	#N/A	#N/A	#N/A	#N/A	#N/A	B2814_o_NA	Copiotroph	0	0	2.01443e-05	0	1.19387e-05	0	5.03484e-05	0	0.000149615	0	0	0	0.000119484	2.92537e-05	9.58197e-05	0	0.00043657	0	2.54568e-05	0	1.78276e-05	0.000132697	0	0	0	0	5.49349e-05	0
158196112f2ff939e5f6ce4c945cf483	Bacteria	Planctomycetes	Planctomycetacia	Pirellulales	Pirellulaceae	Pir2 lineage	uncultured bacterium	B12461_Pir2 lineage	Copiotroph	0	0	0	0	0	0	0	0	3.74037e-05	0	0	0	0	0	5.63645e-05	0	0	0	0	0	0	0	0	0	0	0	0	0
1641a6da28f83e85c1e5a9d178ff1a51	Bacteria	Chloroflexi	Dehalococcoidia	#N/A	#N/A	#N/A	#N/A	B3221_o_NA	Copiotroph	0	0	0	0	0	0	0	0	0.000222085	0	0.000173454	0.000132487	8.11588e-05	0	0	0	5.37954e-05	0	8.79418e-05	0	0	0.000109818	0	0	3.70709e-05	0	0	0
167e921f990f4d277debe41db7224055	Bacteria	Bacteroidetes	Ignavibacteria	OPB56	uncultured prokaryote	uncultured prokaryote	uncultured prokaryote	B7258_uncultured prokaryote	Copiotroph	0	0	0	0	0	0	0	0	0	0	0	0	0.000220932	0	0	0	0	0	0	0	0	2.74546e-05	0	0	0	0	0	0
1784a11b1268f875d6c1e1f8f51fb056	Bacteria	Acidobacteria	Thermoanaerobaculia	Thermoanaerobaculales	Thermoanaerobaculaceae	Thermoanaerobaculum	#N/A	B2520_Thermoanaerobaculum	Copiotroph	0	0	0.000234178	0	5.01427e-05	0	0	0	0.000137926	0	0.000102172	0.000172736	0.000270529	0	0.000140911	0.000113179	0	0	3.47139e-05	0	0	0	0	0	1.96258e-05	0	0	5.75032e-05
1959230c7461d25c73657d8f7aaaa3c0	Bacteria	Bacteroidetes	Ignavibacteria	Ignavibacteriales	BSV40	uncultured Chlorobiales bacterium	uncultured Chlorobiales bacterium	B933_uncultured Chlorobiales bacterium	Copiotroph	0	0	0.000216552	0	0	6.57593e-05	0.000297712	0.000127772	0.000292217	0.000358971	0.000465712	0.000362242	0.000380995	0.000164552	0.000248004	0.000266643	9.51764e-05	0.000125237	0.000129598	8.38972e-05	5.34827e-05	0.000228788	0.000137299	4.56795e-05	4.57934e-05	0	0.000788865	3.62057e-05
1a3dbf43af8a200d86404bf2af0c99d6	Bacteria	Fibrobacteres	Chitinivibrionia	uncultured	uncultured bacterium	uncultured bacterium	uncultured bacterium	B4302_uncultured bacterium	Copiotroph	0	0	0	0	0	0	0	0	0	0	6.41542e-05	0	0	7.13059e-05	5.91828e-05	0	8.48312e-05	6.60343e-05	6.47992e-05	4.61435e-05	0	3.20304e-05	8.93534e-05	0	0	0	0	0
1a41376fd91bf261dbb4f6e3a31cd590	Bacteria	Patescibacteria	Gracilibacteria	Candidatus Peregrinibacteria	uncultured bacterium	uncultured bacterium	uncultured bacterium	B11039_uncultured bacterium	Copiotroph	0	0	0	0	0	0	0	0	0	0	0	0	6.08691e-05	3.83955e-05	0	0	0	0	0	0	0	0	0	0	0	0	0	0
1b35f7f0b8431ab5009d091f39d98de8	Bacteria	Acidobacteria	Subgroup 22	#N/A	#N/A	#N/A	#N/A	B1313_o_NA	Copiotroph	9.33735e-05	0	1.76263e-05	0	0.000112224	0	0.000124776	0	0.000371699	0.000117972	0.000125932	0.000286775	0.000187116	0.000246828	0.000383279	0	0.000171731	0.00010019	0.00014117	0.000388025	0	0	7.19186e-05	0	4.79741e-05	0	0.000204358	0
1b6b92a1374dec0925235807df1c9902	Bacteria	TA06	uncultured soil bacterium	uncultured soil bacterium	uncultured soil bacterium	uncultured soil bacterium	uncultured soil bacterium	B2360_uncultured soil bacterium	Copiotroph	0	0	0	0	7.64079e-05	0	0	0	0.000236111	0.000129769	0	0.000132487	0.000184862	0	8.17286e-05	0.000124689	0	0.00016167	0	0	0.000196103	0	0	0	0	0	0	0.000112877
1b96ba3daf17d50c645995771a076c52	Bacteria	Gemmatimonadetes	Gemmatimonadetes	Gemmatimonadales	Gemmatimonadaceae	uncultured	#N/A	B3091_uncultured	Copiotroph	0	0	0	0	2.38775e-05	4.20129e-05	0	0	0.000133251	3.53915e-05	0.000218599	0.000270005	0	1.27985e-05	0	0	0	0	0	1.04871e-05	8.65911e-05	4.80456e-05	0	0	0	1.86631e-05	0	0
1bc10fc2b2f68e01c243198991c29232	Bacteria	Acidobacteria	Thermoanaerobaculia	Thermoanaerobaculales	Thermoanaerobaculaceae	Subgroup 23	#N/A	B2639_Subgroup 23	Copiotroph	4.66868e-05	0	0	0	0	1.64398e-05	0	0	0.000128575	0.000124713	9.97954e-05	0	0.000139773	4.02239e-05	6.76375e-05	0.000214849	0.000113798	1.59393e-05	0	1.25846e-05	5.09359e-05	3.43183e-05	0	0	0	0	4.83427e-05	3.83355e-05
1bd8bf95383f066a50f436213b686b60	Bacteria	#N/A	#N/A	#N/A	#N/A	#N/A	#N/A	B15501_o_NA	Copiotroph	0	0	0	0	0	0	0	0	0	0	0	0	6.76323e-06	0	4.50916e-05	0	0	0	0	0	0	0	0	0	0	0	0	0
1c5b1575db3681bf2921a195b2d3297c	Bacteria	Proteobacteria	Deltaproteobacteria	Deltaproteobacteria Incertae Sedis	Syntrophorhabdaceae	Syntrophorhabdus	uncultured Syntrophorhabdaceae bacterium WCHB1-27	B2543_Syntrophorhabdus	Copiotroph	0.000163404	0	0	0	0	0	0.000234229	0	0	0	0	0	0.000378741	0	0.000171912	0.000178402	0	0.000209488	0	0	0	0	0	0	0	0	0	0
1cc1057af1d4afcab8ef730fd125d643	Bacteria	Chloroflexi	Anaerolineae	SBR1031	anaerobic bacterium MO-CFX2	anaerobic bacterium MO-CFX2	anaerobic bacterium MO-CFX2	B9525_anaerobic bacterium MO-CFX2	Copiotroph	0	0	0	0	0	0	0	0	0	0	0	0	0	0	0	0	0	0	0	0	0	0	0.000143837	0	0	0	0	0
1db1ca80df59cda4a5cbd6ffbf175630	Bacteria	Patescibacteria	ABY1	Candidatus Magasanikbacteria	Candidatus Magasanikbacteria bacterium RIFOXYD1_FULL_40_23	Candidatus Magasanikbacteria bacterium RIFOXYD1_FULL_40_23	Candidatus Magasanikbacteria bacterium RIFOXYD1_FULL_40_23	B13171_Candidatus Magasanikbacteria bacterium RIFOXYD1_FULL_40_23	Copiotroph	0	0	0	0	0	0	0	0	3.27283e-05	2.86503e-05	0	0	0	0	0	0	0	0	0	0	0	0	0	0	0	0	0	0
1ee45b1b882b062181441ee1bea0cd17	Bacteria	Chloroflexi	Anaerolineae	RBG-13-54-9	#N/A	#N/A	#N/A	B339_o_RBG-13-54-9	Copiotroph	0.000163404	9.70301e-05	0	0	0.000210122	0.000215544	0.000571345	0.000440815	0.000794829	0.00075839	0.00134961	0.00129133	0.000743955	0.000992798	0.000589009	0.00023595	0.000242079	0.000125237	0.000557736	0.000178282	0	0.000441562	0.00160182	0.00132634	0.000481921	0.000771974	0.00149203	0.000240662
1f1e2493c2fd4ae831f67c7723b2f0aa	Bacteria	Acidobacteria	Acidobacteriia	Solibacterales	Solibacteraceae (Subgroup 3)	Candidatus Solibacter	#N/A	B6101_Candidatus Solibacter	Copiotroph	0	0	0	0	0	0	0	0	0.000275852	0	0	0	0	0	0	0	0	0	0	0	0	0	6.75599e-05	0	0	0	0	0
1f25a0fb851c0bea83dac8ae41738c59	Bacteria	Chloroflexi	Ktedonobacteria	Ktedonobacterales	Ktedonobacteraceae	uncultured	uncultured bacterium	B8486_uncultured	Copiotroph	0	0	0	0	0	0	0	0	0	0	0	0	0.000123993	0	2.81823e-05	0	0	0	0	3.77537e-05	0	0	0	0	0	0	0	0
1fa32085381b6ef72aa15281e19c4d6c	Bacteria	Elusimicrobia	Elusimicrobia	MD2894-B20	uncultured bacterium	uncultured bacterium	uncultured bacterium	B8368_uncultured bacterium	Copiotroph	0	0	1.51083e-05	0	0	0	2.40797e-05	0	0	0	0	0	4.05794e-05	3.47388e-05	4.22734e-05	0	0	0	0	0	0	0	3.48696e-05	0	0	0	0	0
1fb3912f294c12ed892c21f298e0b436	Bacteria	#N/A	#N/A	#N/A	#N/A	#N/A	#N/A	B8614_o_NA	Copiotroph	0	0	0	0	0	0	0	0	0	0	7.12824e-06	0	6.98867e-05	5.1194e-05	3.6637e-05	0	0	0	0	0	5.09359e-06	9.15154e-06	0	0	0	0	0	0
1fee011864f77845ab581f18e38f5442	Bacteria	Proteobacteria	Alphaproteobacteria	Rhodospirillales	uncultured	#N/A	#N/A	B9003_f_uncultured	Copiotroph	0	0	5.53969e-05	0	0	0	0	0	1.40264e-05	0	9.50433e-06	0	4.50882e-06	2.01119e-05	3.38187e-05	0	1.44834e-05	0	0	0	0	0	2.17935e-05	0	0	0	0	0
202ad1e607bc314cd43527cee67b857d	Bacteria	Chloroflexi	Anaerolineae	#N/A	#N/A	#N/A	#N/A	B1108_o_NA	Copiotroph	5.36898e-05	5.43369e-05	0	5.28555e-05	0.000143265	0.000151612	0.000317414	0.00027897	0.000280528	0.000355601	0.000479968	0.000271682	0.000155554	0	0.00014373	9.59148e-05	5.58644e-05	5.4649e-05	0.000370281	0.000339784	3.05616e-05	0.000176167	6.53806e-05	1.79455e-05	0	0	7.25141e-05	0
210a867bd2eb0d42a7cbde6b950f1546	Bacteria	Chloroflexi	Anaerolineae	Anaerolineales	Anaerolineaceae	uncultured	uncultured Anaerolineaceae bacterium	B676_uncultured	Copiotroph	0.000217093	4.46338e-05	0.000312237	0	0	0.000211891	0.000323981	0	0.000895351	0.000775243	0.000477592	0.00036895	6.76323e-05	0.000316306	0.000504463	0.000118934	0.000128281	0.00038482	0.000738248	0.000459337	7.38571e-05	0.000141849	0.000326903	0.000102779	0	7.63491e-05	9.44881e-05	0.000553735
211128c744bc1a20f83f6d352dd27838	Bacteria	Zixibacteria	uncultured bacterium	uncultured bacterium	uncultured bacterium	uncultured bacterium	uncultured bacterium	B1929_uncultured bacterium	Copiotroph	9.57079e-05	0	0	0	3.58162e-05	0	0	0	0	0	0.000123556	0	0.000196134	0	0.000112729	0.000253215	9.31074e-05	7.05883e-05	0.000340196	0.000207646	0.000287788	0.000114394	3.05109e-05	0	0	0	0	0
21146c688feaae3fd32c392df1cdba62	Bacteria	Chloroflexi	Dehalococcoidia	S085	uncultured Chloroflexi bacterium	uncultured Chloroflexi bacterium	uncultured Chloroflexi bacterium	B6673_uncultured Chloroflexi bacterium	Copiotroph	0	0	0	0	0	0	0	0	0	0	0	0	0.000234459	0	6.76375e-05	0	0	0	0	0	0	0	0	0	0	0	0	0
21255ae4e8f8707c9028add2d5fcac6c	Bacteria	FCPU426	#N/A	#N/A	#N/A	#N/A	#N/A	B10433_o_NA	Copiotroph	0	0	0	0	0	0	0	0	0	0	0	0	5.63603e-05	0	8.45468e-05	0	0	0	0	0	0	0	0	0	0	0	0	0
21f7fe6001c991b342bf662a628aee40	Bacteria	Chlamydiae	Chlamydiae	Chlamydiales	#N/A	#N/A	#N/A	B13487_o_Chlamydiales	Copiotroph	0	0	0	0	0	0	0	0	0	0	4.51455e-05	0	0	0	2.81823e-05	0	0	0	0	0	0	0	0	0	0	0	0	0
223c1fa30c25d9d92d8deee605031b9a	Bacteria	Armatimonadetes	Chthonomonadetes	Chthonomonadales	Chthonomonadaceae	Chthonomonas	uncultured bacterium	B6906_Chthonomonas	Copiotroph	0	0	6.2951e-05	0	0	0	0	0	0	0	5.7026e-05	0	7.66499e-05	0	0.000104274	0	0	0	0	0	0	0	0	0	0	0	0	0
229019c3b977a396f4c91f339a64209a	Bacteria	Chloroflexi	JG30-KF-CM66	uncultured Caldilinea sp.	uncultured Caldilinea sp.	uncultured Caldilinea sp.	uncultured Caldilinea sp.	B9191_uncultured Caldilinea sp.	Copiotroph	0	0	0	0	0	0	0	0	0	0	0	0	7.21411e-05	0	0.000109911	0	0	0	0	0	0	0	0	0	0	0	0	0
22ae605d242510d111d9c499d4062977	Bacteria	Proteobacteria	Deltaproteobacteria	Myxococcales	#N/A	#N/A	#N/A	B1568_o_Myxococcales	Copiotroph	0	0	0	0	0	0	0.000267065	0	0.000483911	0	0.00023048	0	0	0	0.000501644	0	0	0	0	0	0	0.000201334	0.000616757	0	0	0	0.000235121	0.00016612
22b886bbc546e9760d34e0ef70ca4208	Bacteria	Chloroflexi	Dehalococcoidia	#N/A	#N/A	#N/A	#N/A	B4819_o_NA	Copiotroph	0	4.46338e-05	5.53969e-05	0	0	0	0	0	3.5066e-05	0	0	0	0.000155554	2.19403e-05	0	0	0	0	0	0	7.38571e-05	3.66062e-05	0	0	0	0	0	7.02817e-05
232481b6a33c9fef9d83d6b85351ccc6	Bacteria	Planctomycetes	Planctomycetacia	Isosphaerales	Isosphaeraceae	Singulisphaera	#N/A	B9192_Singulisphaera	Copiotroph	0	0	0	0	0	0	0	0	6.54565e-05	0	0.000102172	0	0	0	0	0	0	0	0	0	0	0	0	0	0	0	0	0
24d1f4f431cb21fdc1e106c418060312	Bacteria	Chloroflexi	Anaerolineae	SBR1031	uncultured Gemmatimonadetes bacterium	uncultured Gemmatimonadetes bacterium	uncultured Gemmatimonadetes bacterium	B3006_uncultured Gemmatimonadetes bacterium	Copiotroph	0	0	0	0	0	0	0	0	0.000820544	0	0	0	0	0	0	0	0	0	0	0	0	0.000253955	0	0	0	0	0	0
26b9e56ced59e91ac1e20e9390047b77	Bacteria	Nitrospirae	4-29-1	uncultured prokaryote	uncultured prokaryote	uncultured prokaryote	uncultured prokaryote	B1885_uncultured prokaryote	Copiotroph	0	0	0.00014101	0	0	0	0	0	0	0	0	0	0.000394522	0.000385783	0.000245186	0.000209094	8.27621e-05	0	0	6.29229e-05	0.000203744	0.000235652	0	0	0	0	0	0
2711360e82c2b159844394df92a8a731	Bacteria	Zixibacteria	uncultured bacterium	uncultured bacterium	uncultured bacterium	uncultured bacterium	uncultured bacterium	B20683_uncultured bacterium	Copiotroph	0	0	0	0	0	0	0	0	0	0	4.75216e-06	3.3541e-06	0	0	0	0	0	0	0	0	0	0	0	0	0	0	0	0
2736341e9cdfa4c86f8b0b1b6a7ba322	Bacteria	Planctomycetes	Planctomycetacia	Gemmatales	Gemmataceae	uncultured	#N/A	B6077_uncultured	Copiotroph	0	0	0	0	0	0	0	0	4.90924e-05	0	0	7.71442e-05	0.000103703	0	0	0	0	0	8.56275e-05	0	0	0	0	0	0	0	0	0
276a4ed40970946b07394aabe3f2b3a4	Bacteria	Chloroflexi	Anaerolineae	RBG-13-54-9	uncultured bacterium	uncultured bacterium	uncultured bacterium	B2157_uncultured bacterium	Copiotroph	0	0	0	0	0	0	0	0	0	0	0.000323147	0	0.000653779	9.87313e-05	0.000279004	0	0	0	0	7.341e-05	0	0.000251667	0	0	0	0	0	7.24115e-05
27a62ef3bb1b923986c9efa0fee8f72f	Bacteria	Bacteroidetes	Ignavibacteria	OPB56	uncultured bacterium KF-JG30-B11	uncultured bacterium KF-JG30-B11	uncultured bacterium KF-JG30-B11	B1896_uncultured bacterium KF-JG30-B11	Copiotroph	0	0	0	0	0	0	0	0	0	0	0	0	0.000410303	0.000610671	0.000481917	0.000187993	0	0	1.38855e-05	0	0.000124793	0.000105243	0	0	0	0	0	0
27bf6e426d15755ad0c8771c5a0d3d78	Bacteria	Zixibacteria	uncultured bacterium	uncultured bacterium	uncultured bacterium	uncultured bacterium	uncultured bacterium	B2645_uncultured bacterium	Copiotroph	0	0	3.52526e-05	0	0	0	0	0	4.20792e-05	0	7.60346e-05	6.70819e-05	0.000108212	9.50746e-05	0	0.000161137	0	9.10817e-06	1.85141e-05	6.92152e-05	0.000178276	0.000249379	6.10219e-05	1.63141e-05	2.61677e-05	0	0	0
29ca1938ff207428d8460d93d3b7e833	Bacteria	Proteobacteria	Deltaproteobacteria	Oligoflexales	Oligoflexaceae	uncultured	uncultured bacterium	B19240_uncultured	Copiotroph	0	0	0	0	0	0	0	0	0	0	0	0	6.76323e-06	0	1.12729e-05	0	0	0	0	0	0	0	0	0	0	0	0	0
2bd6cb6284b4520c89e9987cb907846e	Bacteria	Planctomycetes	Pla4 lineage	uncultured Planctomycetales bacterium	uncultured Planctomycetales bacterium	uncultured Planctomycetales bacterium	uncultured Planctomycetales bacterium	B11471_uncultured Planctomycetales bacterium	Copiotroph	0	0	0	0	0	0	0	0	0	0	7.84107e-05	0	0	0	0	0	0	0	2.54568e-05	0	0	0	0	0	0	0	0	0
2be9111e24cbf1847df16465a388111e	Bacteria	Planctomycetes	Planctomycetacia	Isosphaerales	Isosphaeraceae	uncultured	#N/A	B3128_uncultured	Copiotroph	0	0	0	0	0	0	0	0	7.0132e-05	0.000138196	2.37608e-05	0.000166028	0.0003066	0	0	6.52221e-05	3.51739e-05	0	0	0	0	4.11819e-05	0	0	1.52645e-05	0	0	0
2cdb1fb43070c65aa4a68b7d72ecc98a	Bacteria	Acidobacteria	Aminicenantia	Aminicenantales	uncultured Aminicenantes bacterium	uncultured Aminicenantes bacterium	uncultured Aminicenantes bacterium	B3368_uncultured Aminicenantes bacterium	Copiotroph	0	0	0	0	0	0	0	0	4.67546e-05	0.000205608	1.18804e-05	3.3541e-05	8.56676e-05	0	5.07281e-05	0.000207176	0	0	0	0	2.03744e-05	9.15154e-05	0	0	0	0	8.78959e-06	0
2d272bc974e3995ef99e40091e63f085	Bacteria	Actinobacteria	Acidimicrobiia	#N/A	#N/A	#N/A	#N/A	B7674_o_NA	Copiotroph	0	0	0	0	0	0	0	0	0	0	0	0	0.000164572	0	7.60921e-05	0	0	0	0	0	0	0	0	0	0	0	0	0
305d7a93909ef5402e1fa777543b7dce	Bacteria	Armatimonadetes	Fimbriimonadia	Fimbriimonadales	Fimbriimonadaceae	uncultured bacterium	uncultured bacterium	B3140_uncultured bacterium	Copiotroph	0	0	0	7.73956e-05	0	0	0	0	1.63641e-05	0	8.55389e-05	0.000110685	0.000178098	0	0	0	0	0	9.95131e-05	0	0	0.000176167	0	0	3.27096e-05	0	0.000145028	0
30d2d045b68effaaa855c1703488500b	Bacteria	Planctomycetes	Planctomycetacia	Isosphaerales	Isosphaeraceae	#N/A	#N/A	B5063_f_Isosphaeraceae	Copiotroph	0	0	0	0	0	0	0	0	0.000259488	0	6.89064e-05	0	0	0	0	0	0	0	0	0	0	0	0.00013512	0	0	0	0	0
31610257d458e108718a34edad7cfcca	Bacteria	Chloroflexi	Anaerolineae	SBR1031	A4b	wastewater metagenome	wastewater metagenome	B3440_wastewater metagenome	Copiotroph	0	0	0	0	0.000303244	0	0	0	0	0	0.000133061	0	7.66499e-05	0	3.94552e-05	0	0	0	0	0	0	0	0.000307289	0	0	0	0	0
32fcf2bf1eac9587cebe9112446fc64a	Bacteria	Patescibacteria	ABY1	Candidatus Falkowbacteria	#N/A	#N/A	#N/A	B18477_o_Candidatus Falkowbacteria	Copiotroph	0	0	0	0	0	0	0	0	4.67546e-06	0	1.66326e-05	0	0	0	0	0	0	0	0	0	0	0	0	0	0	0	0	0
338eae7b1cd1930c2c4239b665cc4678	Bacteria	Chloroflexi	KD4-96	#N/A	#N/A	#N/A	#N/A	B11694_o_NA	Copiotroph	0	0	0	0	0	0	0	0	0	0	0	0	0	0	0	0	0	0	0	0	0	0	9.15328e-05	0	0	0	0	0
339b64f9fef9d34526cfde911856c7ce	Bacteria	Chloroflexi	Anaerolineae	#N/A	#N/A	#N/A	#N/A	B9673_o_NA	Copiotroph	0	0	0	0	0	0	0	0	3.74037e-05	0	0	0	3.8325e-05	0	0	0	0	0	7.1742e-05	0	0	0	0	0	0	0	0	0
33e0cd23c66344a411ac17230a0dc004	Bacteria	Chloroflexi	Anaerolineae	Anaerolineales	Anaerolineaceae	Leptolinea	metagenome	B1562_Leptolinea	Copiotroph	0	0	0	0.000519117	0	0	0	0	0.000287541	0	0	0	0.000696613	0	0.000645374	0	0	0	0	0	0	0	0.000512148	0	0	0	0	0
34eab2d7d30b587bbedcf967d15983ae	Bacteria	Elusimicrobia	Elusimicrobia	MD2894-B20	uncultured bacterium	uncultured bacterium	uncultured bacterium	B10947_uncultured bacterium	Copiotroph	0	0	0	0	0	0	0	0	0	0	0	0	4.28338e-05	2.92537e-05	0	0	0	0	0	0	0	3.20304e-05	0	0	0	0	0	0
355cabe3b4c13db94d81ba2fa79fbcc0	Bacteria	Chloroflexi	TK10	#N/A	#N/A	#N/A	#N/A	B11801_o_NA	Copiotroph	0	0	0	0	0	0	0	0	0	0	0	0	9.24308e-05	0	0	0	0	0	0	0	0	0	0	0	0	0	0	0
356fdcf54da792c3811cdbb4511d49a7	Bacteria	Elusimicrobia	Lineage IIc	Elusimicrobia bacterium RIFCSPHIGHO2_02_FULL_39_36	Elusimicrobia bacterium RIFCSPHIGHO2_02_FULL_39_36	Elusimicrobia bacterium RIFCSPHIGHO2_02_FULL_39_36	Elusimicrobia bacterium RIFCSPHIGHO2_02_FULL_39_36	B13665_Elusimicrobia bacterium RIFCSPHIGHO2_02_FULL_39_36	Copiotroph	0	0	0	0	0	0	0	0	0	0	6.17781e-05	0	0	0	0	0	0	0	0	0	0	4.57577e-06	0	0	0	0	0	0
357e8dd2b2f6ed8f81c4f98f6848883a	Bacteria	TA06	uncultured soil bacterium	uncultured soil bacterium	uncultured soil bacterium	uncultured soil bacterium	uncultured soil bacterium	B1640_uncultured soil bacterium	Copiotroph	0.000109714	0	0.00014101	3.02032e-05	0	0	0	0.000181011	0.000182343	0.000367398	0.000228104	0.000244849	0.000142028	0	6.2001e-05	0.000172647	0	0	0.000136541	0.000119553	0	0	0	0	0	0	9.88828e-05	0
3894d51072b93a282bb7544d0643d0a9	Bacteria	Patescibacteria	Gracilibacteria	Candidatus Peregrinibacteria	uncultured bacterium	uncultured bacterium	uncultured bacterium	B18901_uncultured bacterium	Copiotroph	0	0	0	0	0	0	0	0	0	0	0	1.34164e-05	0	0	0	0	0	0	0	0	0	0	0	0	0	0	0	0
3896e9459f1e8ffec6187611cc131081	Bacteria	Bacteroidetes	Ignavibacteria	OPB56	uncultured bacterium	#N/A	#N/A	B9676_f_uncultured bacterium	Copiotroph	0	0	0	0	0	0	0	0	0	0	0	0	9.24308e-05	0	0	4.41208e-05	0	0	0	0	0	0	0	0	0	0	0	0
38cdaeaf674af764b72bc8d7776eeabe	Bacteria	Chloroflexi	SHA-26	uncultured bacterium	uncultured bacterium	uncultured bacterium	uncultured bacterium	B9534_uncultured bacterium	Copiotroph	0	0	0	0	0	0	0	0	3.97414e-05	0	0	0	0	0	0	0	0	0	0	0	0	0	0.000106788	0	0	0	0	0
39aad473e32e3c89e00d7ce28659f580	Bacteria	Planctomycetes	Planctomycetacia	Isosphaerales	Isosphaeraceae	#N/A	#N/A	B3238_f_Isosphaeraceae	Copiotroph	0	0	0	0	0	0	0	0	0	0	4.03934e-05	0	0	0.000115187	7.89104e-05	0	0	0	0.00020134	0.000180379	0.000183369	0.000125834	0	0	0	0	0	0
39af31892fe0d181c12daa9382850a45	Bacteria	Latescibacteria	uncultured bacterium	uncultured bacterium	uncultured bacterium	uncultured bacterium	uncultured bacterium	B11144_uncultured bacterium	Copiotroph	0	0	0	0	0	0	0	0	7.24697e-05	0	0	0	0	0	0	0	0	0	3.70281e-05	0	0	0	0	0	0	0	0	0
3abfe09e94d190cea3dd4a70b129066e	Bacteria	Fibrobacteres	Fibrobacteria	Fibrobacterales	B122	uncultured bacterium	uncultured bacterium	B4102_uncultured bacterium	Copiotroph	0	0	0	0	0	0	0	0	0.000119224	0.000175272	0.000140189	0	0	0	6.2001e-05	0	0	0	0	0	0	0	0	0	0	0	0.000105475	0
3af123ffe8db50a63105d6a124930fe9	Bacteria	Planctomycetes	Phycisphaerae	Phycisphaerales	AKAU3564 sediment group	uncultured soil bacterium	uncultured soil bacterium	B11360_uncultured soil bacterium	Copiotroph	0	0	0	0	0	0	0	0	2.57151e-05	0	0	5.70196e-05	0	0	0	0	0	0	0	0	0	0	0	0	0	0	0	0
3af62dcf713f3d6d0c41def85557970e	Bacteria	Bacteroidetes	Bacteroidia	Chitinophagales	Chitinophagaceae	uncultured	#N/A	B4672_uncultured	Copiotroph	0	0	0	0	0	0	0	0	0.000217409	0.000170216	0	0	0	0	0	0	0	0	0	7.55075e-05	0	0	0	0	0	0	0	0
3b6b2c948b0550b439360f67e503ed79	Bacteria	Patescibacteria	ABY1	Candidatus Magasanikbacteria	#N/A	#N/A	#N/A	B10264_o_Candidatus Magasanikbacteria	Copiotroph	0	0	0	0	0	0	0	0	0	0	3.08891e-05	4.36032e-05	0	0	0	0	0	0	0	0	4.58424e-05	0	0	0	0	0	0	0
3ba6915e4f9a19456a9f4c4eface96d1	Bacteria	Proteobacteria	Gammaproteobacteria	Competibacterales	Competibacteraceae	#N/A	#N/A	B3845_f_Competibacteraceae	Copiotroph	4.66868e-05	0	0	0	0	0	0	0	3.5066e-05	0	7.60346e-05	0	9.01764e-06	0	0	0	0	0	0.000277711	0.000245399	1.78276e-05	0	0	0	0	0	0	0
3bb29d099a1b4fe95f12570dfa563664	Bacteria	Proteobacteria	Deltaproteobacteria	Syntrophobacterales	Syntrophaceae	Desulfobacca	#N/A	B2456_Desulfobacca	Copiotroph	0	0	0	0	0	0	0	0	0	0	0	0	0	0	0	0	0	0	0	0	0	0	0.00135774	0	0	0	0	0
3bb9db057661b371eb07a3b99138ab90	Bacteria	Planctomycetes	Planctomycetacia	Pirellulales	Pirellulaceae	Pir2 lineage	uncultured bacterium	B8763_Pir2 lineage	Copiotroph	0	0	0	0	0	0	0	0	0	0	0.000114052	0	0	0	0	0	0	0	0	0	0	0	6.53806e-05	0	0	0	0	0
3bf3ca1155335c1c6beef070c1670939	Bacteria	Planctomycetes	Phycisphaerae	MSBL9	#N/A	#N/A	#N/A	B13671_o_MSBL9	Copiotroph	0	0	0	0	0	0	0	0	2.33773e-05	0	4.27695e-05	0	0	0	0	0	0	0	0	0	0	0	0	0	0	0	0	0
3c1dfcdd09a9f5984f9828ead2d3bb7b	Bacteria	Spirochaetes	Spirochaetia	Spirochaetales	Spirochaetaceae	Spirochaeta 2	Spirochaeta sp.	B3343_Spirochaeta 2	Copiotroph	0	0	0	0	0	0	0	0	0	0	0	0	0.000299837	0	0.000388915	0.000226359	0	0	0	0	0	0	0	0	0	0	0	0
3cd35af2c916f923f04dbad25b9c8e45	Bacteria	Patescibacteria	ABY1	Candidatus Falkowbacteria	#N/A	#N/A	#N/A	B17798_o_Candidatus Falkowbacteria	Copiotroph	0	0	0	0	0	0	0	0	1.16887e-05	0	1.42565e-05	0	0	0	0	0	0	0	0	0	0	0	0	0	0	0	0	0
3d7ecb4d5ea8cdfe1c533b179cdc1dde	Bacteria	Chloroflexi	Anaerolineae	RBG-13-54-9	uncultured prokaryote	uncultured prokaryote	uncultured prokaryote	B6156_uncultured prokaryote	Copiotroph	0	0	0	0	0	0	0	0	0	0	0.000278002	0	0	0	8.45468e-05	0	0	0	0	0	0	0	0	0	0	0	0	0
3ea71ddcdf7758cc12d740ca6bed4bb0	Bacteria	Acidobacteria	Acidobacteriia	Subgroup 12	uncultured bacterium	uncultured bacterium	uncultured bacterium	B3868_uncultured bacterium	Copiotroph	0	0	0	0	0	0	0	0	0	8.0895e-05	7.36585e-05	4.02491e-05	2.93073e-05	0	7.89104e-05	4.22025e-05	0	0	6.71135e-05	9.01895e-05	0	5.49092e-05	3.48696e-05	0	7.41418e-05	0	0	0
3fb873e7f3006bee2eb26a7ae019540d	Bacteria	Proteobacteria	Deltaproteobacteria	Myxococcales	Blfdi19	#N/A	#N/A	B11576_f_Blfdi19	Copiotroph	0	0	0	0	0	0	0	0	0.000100522	0	0	0	0	0	0	0	0	0	0	0	0	0	0	0	0	0	0	0
3fceb608980cfa15dec1c6a709906d17	Bacteria	Planctomycetes	Planctomycetacia	Isosphaerales	Isosphaeraceae	uncultured	uncultured Isosphaera sp.	B3653_uncultured	Copiotroph	0	0	0	0	1.43265e-05	0	0	0	0	2.02237e-05	3.08891e-05	2.01246e-05	0.000112721	4.38806e-05	3.38187e-05	3.45293e-05	0	0	8.33133e-05	0.00014682	0.000152808	4.11819e-05	4.3587e-06	0	0	0	1.0987e-05	8.51899e-06
3fd7538ee64f52547a8e8cd2d842878e	Bacteria	Kiritimatiellaeota	Kiritimatiellae	WCHB1-41	uncultured Verrucomicrobia bacterium	uncultured Verrucomicrobia bacterium	uncultured Verrucomicrobia bacterium	B6562_uncultured Verrucomicrobia bacterium	Copiotroph	0	0	0	0	0	0	0	0	0	0	0	0.000155965	0	0	0	0	0	0	0	0	0	0	8.49947e-05	0	0	0	0	0
401080ac23cd2a0209187f8d87bc722d	Bacteria	Planctomycetes	Phycisphaerae	Tepidisphaerales	WD2101 soil group	#N/A	#N/A	B6910_f_WD2101 soil group	Copiotroph	0	0	0	0	0	0	0	0	0	0	0	0.000137518	0	0	0	0	0	0	0	0	0	0	8.28154e-05	0	0	0	0	0
401d1636537011ab9b546b90552b52ff	Bacteria	Fibrobacteres	Fibrobacteria	Fibrobacterales	Candidatus Raymondbacteria	uncultured bacterium	uncultured bacterium	B11808_uncultured bacterium	Copiotroph	0	0	0	0	0	0	0	0	0	0	0	0	5.18514e-05	0	0	0	0	0	0	0	4.58424e-05	0	0	0	0	0	0	0
4066083a69e46899c4fb82fb99c8edbd	Bacteria	Firestonebacteria	uncultured bacterium	uncultured bacterium	uncultured bacterium	uncultured bacterium	uncultured bacterium	B15532_uncultured bacterium	Copiotroph	0	0	0	0	0	0	0	0	0	0	0	0	3.15617e-05	0	1.40911e-05	0	0	0	0	0	0	0	0	0	0	0	0	0
4075ffda34c056525055c010d09b70f6	Bacteria	Proteobacteria	Deltaproteobacteria	SAR324 clade(Marine group B)	uncultured bacterium	uncultured bacterium	uncultured bacterium	B17124_uncultured bacterium	Copiotroph	0	0	0	0	0	0	0	0	0	0	3.08891e-05	0	0	0	0	0	0	0	0	0	0	0	0	0	0	0	0	0
4084f8aa9c1942b7476cc3a512d0b960	Bacteria	Armatimonadetes	Chthonomonadetes	Chthonomonadales	#N/A	#N/A	#N/A	B1247_o_Chthonomonadales	Copiotroph	0	0	0	0	0	0	0	0	0	0	0	0	0.000464408	0.000925149	0.00079474	0	0	0	0	0	0	0.00044385	0.00033562	0	0.000309651	0	0.000199963	0
41076c81cce3a38a90c2b3380dd3ffff	Bacteria	Patescibacteria	Saccharimonadia	Saccharimonadales	uncultured bacterium	uncultured bacterium	uncultured bacterium	B7675_uncultured bacterium	Copiotroph	0	0	0	0	0	0	0	0	0	0.00010786	8.55389e-05	0	0	0	0	0	0	0	0	0	0	0	0	0	0	0	0	0
41e992bc318308bd0534bd258cff0e6e	Bacteria	Planctomycetes	Planctomycetacia	Isosphaerales	Isosphaeraceae	uncultured	uncultured Isosphaera sp.	B4232_uncultured	Copiotroph	0	0	0	0	0	0	0	0	1.87019e-05	1.85384e-05	0	0	0	0.000135298	0.000107093	0.000103588	0	0	0	0	0.000106965	9.8379e-05	0	0	0	0	0	0
42517b2cb37a6844417ab577076b6383	Bacteria	Zixibacteria	uncultured bacterium	uncultured bacterium	uncultured bacterium	uncultured bacterium	uncultured bacterium	B2407_uncultured bacterium	Copiotroph	0	0	5.03608e-05	0	0	0	0	0	0	0	0	0	0.000464408	0.000281567	0.000171912	7.09769e-05	0	0	0	0.0001636	0	0	0	0	0	0	0.000199963	0
425a23c5204c3f004e1b9aa6a1cd7f9b	Bacteria	Chlamydiae	Chlamydiae	Chlamydiales	#N/A	#N/A	#N/A	B18911_o_Chlamydiales	Copiotroph	0	0	0	0	0	0	0	0	1.87019e-05	0	0	0	0	0	0	0	0	0	0	0	0	0	0	0	0	0	0	0
434362707bbbc22fa7c7d3cba52e50c0	Bacteria	Proteobacteria	Deltaproteobacteria	Myxococcales	bacteriap25	uncultured Geobacter sp.	uncultured Geobacter sp.	B16825_uncultured Geobacter sp.	Copiotroph	0	0	0	0	0	0	0	0	0	0	2.13847e-05	0	1.12721e-05	0	0	0	0	0	0	0	0	0	0	0	0	0	0	0
43998cd352513f85fc838a6a6ef41dee	Bacteria	Margulisbacteria	uncultured delta proteobacterium	uncultured delta proteobacterium	uncultured delta proteobacterium	uncultured delta proteobacterium	uncultured delta proteobacterium	B16012_uncultured delta proteobacterium	Copiotroph	0	0	0	0	0	0	0	0	0	0	0	0	3.38162e-05	0	0	0	0	0	0	4.19486e-06	0	0	0	0	0	0	0	0
443bb1d252f9a9492309b6c7cc7f8bb7	Bacteria	Planctomycetes	Phycisphaerae	MSBL9	SG8-4	#N/A	#N/A	B1251_f_SG8-4	Copiotroph	0	2.13466e-05	0	0	2.14897e-05	5.47994e-05	0.000142289	6.60157e-05	0.000296892	0.000203923	0.000106924	0	0.000457645	0.000447948	0.000112729	0.000322274	7.65549e-05	0	0	0	0	0.000347758	8.0636e-05	0.000292023	0	0	2.1974e-05	0.000123525
452c8f6b1facb6a6528e228858d5d7f3	Bacteria	Elusimicrobia	Elusimicrobia	MVP-88	uncultured bacterium	uncultured bacterium	uncultured bacterium	B4371_uncultured bacterium	Copiotroph	8.87048e-05	0	0	0	0	0	0	0	0	0	0	0	1.80353e-05	4.93657e-05	0.000191639	0.000124689	0	1.82163e-05	0	0	0	9.60911e-05	0	0	0	0	0	0
45c3704b15ddee95a9ddfa771f36cb40	Bacteria	Verrucomicrobia	Verrucomicrobiae	Verrucomicrobiales	Rubritaleaceae	Luteolibacter	#N/A	B11579_Luteolibacter	Copiotroph	0	0	0	0	0	0	0	0	0	0	0	4.52803e-05	0	0	0	0	0	0	0	0	0	0	3.48696e-05	0	0	0	0	0
45da66dc7610bd29cbb9606d1bd2d558	Bacteria	Chloroflexi	Dehalococcoidia	FW22	uncultured Chloroflexi bacterium	uncultured Chloroflexi bacterium	uncultured Chloroflexi bacterium	B9764_uncultured Chloroflexi bacterium	Copiotroph	0	0	0	0	0	0	0	0	1.63641e-05	0	0.000133061	0	0	0	0	0	0	0	0	0	0	0	0	0	0	0	0	0
45f4581de894966b74c1075dd1fb09a1	Bacteria	Latescibacteria	Latescibacteria	Latescibacterales	Latescibacteraceae	uncultured Latescibacteria bacterium	uncultured Latescibacteria bacterium	B6942_uncultured Latescibacteria bacterium	Copiotroph	0	0	0	0	0	0	0	0	8.64961e-05	0	0.000118804	1.00623e-05	0	0	0	0	0	0	1.61998e-05	0	4.83892e-05	0	0	0	0	0	0	0
46308c124e6ce025240028be3a17dd1d	Bacteria	#N/A	#N/A	#N/A	#N/A	#N/A	#N/A	B18500_o_NA	Copiotroph	0	0	0	0	0	0	0	0	0	0	1.18804e-05	0	0	0	1.12729e-05	0	0	0	0	0	0	0	0	0	0	0	0	0
46f0b207bef5114bb9f9021e27008c4f	Bacteria	Planctomycetes	Phycisphaerae	MSBL9	#N/A	#N/A	#N/A	B5214_o_MSBL9	Copiotroph	0	0	0	7.36202e-05	0	0	0	0	0	6.06712e-05	8.07868e-05	0	0	0	0	0	0	0	0.00014117	4.82409e-05	0	0	0	0	0	0	0	0
480c2c6c129a58f571e0cb1abcb743b1	Bacteria	Verrucomicrobia	Verrucomicrobiae	S-BQ2-57 soil group	uncultured bacterium	uncultured bacterium	uncultured bacterium	B13679_uncultured bacterium	Copiotroph	0	0	0	0	0	0	0	0	3.27283e-05	0	0	0	3.15617e-05	0	0	0	0	0	0	0	0	0	0	0	0	0	0	0
481cc2ea57145a65855343e077326763	Bacteria	Planctomycetes	Phycisphaerae	Tepidisphaerales	WD2101 soil group	uncultured Planctomycetales bacterium	uncultured Planctomycetales bacterium	B3697_uncultured Planctomycetales bacterium	Copiotroph	0	0	0	0	0	0	0	0	0	0.000197181	0.000180582	0.000239818	0	0	0	0	0	0	0	0	0	0	0	0	0	0	0	0
487df355bf2b3adc7504f79d464e3bfe	Bacteria	Proteobacteria	Deltaproteobacteria	SAR324 clade(Marine group B)	uncultured bacterium	uncultured bacterium	uncultured bacterium	B13680_uncultured bacterium	Copiotroph	0	0	0	0	0	0	0	0	0	0	1.42565e-05	0	1.12721e-05	0	0	2.30196e-05	0	0	0	0	0	0	0	0	0	0	0	1.06487e-05
4b3de6fe927b0fc59ef7c622995f46ee	Bacteria	Chloroflexi	Anaerolineae	Anaerolineales	Anaerolineaceae	uncultured	#N/A	B6943_uncultured	Copiotroph	0	0	0	0	0	0	0	0	9.11716e-05	8.76362e-05	0	0	0	0	0	0	0	0	0	0	0	6.40608e-05	0	0	0	0	0	0
4b838ba695b6a821d23565086d0a9b92	Bacteria	Chloroflexi	JG30-KF-CM66	uncultured bacterium	uncultured bacterium	uncultured bacterium	uncultured bacterium	B2566_uncultured bacterium	Copiotroph	0	0	6.79871e-05	0	2.38775e-05	0	0	0	0	0	0	0	0.000514006	8.95895e-05	0.000403006	8.63233e-05	0	0	0	4.19486e-05	0	6.86365e-05	0	0	0	0	7.03167e-05	0
4c290df675d5d075ca03f34f34db4ecc	Bacteria	Chloroflexi	Anaerolineae	uncultured	uncultured Chloroflexi bacterium	uncultured Chloroflexi bacterium	uncultured Chloroflexi bacterium	B5127_uncultured Chloroflexi bacterium	Copiotroph	0	0	0	0	0	0	0	0	0	9.43775e-05	0	0.000238141	0	0	0	0	0	0	0	0	0	0	0	0	0	0	0	0
4c39a1a4fbd786cd3e2ce8432e5ec291	Bacteria	#N/A	#N/A	#N/A	#N/A	#N/A	#N/A	B15778_o_NA	Copiotroph	0	0	0	0	0	0	0	0	0	0	0	0	6.76323e-06	0	1.97276e-05	0	0	0	4.62852e-06	0	0	1.37273e-05	0	0	0	0	0	0
4d06fd5eaf30e48b62cc925382a0b5ba	Bacteria	Chloroflexi	NLS2-31	uncultured bacterium	uncultured bacterium	uncultured bacterium	uncultured bacterium	B10269_uncultured bacterium	Copiotroph	0	0	0	0	0	0	0	0	0	0	9.97954e-05	0	0	0	0	0	0	0	0	0	0	0	0	0	0	0	0	3.19462e-05
4ddaff500a5b2d68de2de2d49cae9073	Bacteria	Verrucomicrobia	Verrucomicrobiae	Pedosphaerales	Pedosphaeraceae	#N/A	#N/A	B19736_f_Pedosphaeraceae	Copiotroph	0	0	0	0	0	0	0	0	0	0	0	0	0	0	0	0	0	0	0	0	0	0	1.30761e-05	0	0	0	0	0
4e32a56d2b021b744f240f8ea57026f5	Bacteria	Proteobacteria	Alphaproteobacteria	#N/A	#N/A	#N/A	#N/A	B5465_o_NA	Copiotroph	0	0	0	0	0	0	0	0	2.10396e-05	0	0	1.84475e-05	2.70529e-05	3.65671e-05	9.58197e-05	0	0	0	4.62852e-05	7.76049e-05	1.01872e-05	5.71971e-05	4.3587e-06	0	1.30838e-05	0	0	0
4f854c97460e4d4acce7f86f9cf53cd4	Bacteria	Chloroflexi	Ktedonobacteria	C0119	uncultured bacterium	uncultured bacterium	uncultured bacterium	B5128_uncultured bacterium	Copiotroph	0	0	0	0	0	0	0	0	0	0	2.8513e-05	0	0.000117229	0	0.000233913	0	0	7.28654e-05	0	0	1.78276e-05	2.74546e-05	0	0	0	0	0	0
5040887f1e1dfb32456d9805ea4ed599	Bacteria	Chloroflexi	Chloroflexia	Chloroflexales	Roseiflexaceae	#N/A	#N/A	B6509_f_Roseiflexaceae	Copiotroph	0	0	0	1.69893e-05	0	0	0	0	0	0	0	0	3.60706e-05	0	4.50916e-05	0	0	0	0.000101827	0.000102774	0	0	0	0	0	0	0	0
508761afb8662c99f7cf1b4f4c0fc6a7	Bacteria	Actinobacteria	Acidimicrobiia	IMCC26256	#N/A	#N/A	#N/A	B5596_o_IMCC26256	Copiotroph	0	0	0	0	0	0	0	0	0	0	0	0	0.000166826	0.000159067	0	2.30196e-05	0	0	0	0	0	0	0	0	0	0	0	0
50aa3f1d3e50fea08e99fdcdde9e0c80	Bacteria	#N/A	#N/A	#N/A	#N/A	#N/A	#N/A	B10182_o_NA	Copiotroph	0	0	0	0	0	0	0	0	0	1.17972e-05	8.7915e-05	2.34787e-05	0	0	0	0	0	0	0	0	0	0	0	0	0	0	0	0
50aef04558873fcf7c88ccf0fa71006e	Bacteria	Bacteroidetes	Ignavibacteria	Ignavibacteriales	#N/A	#N/A	#N/A	B2553_o_Ignavibacteriales	Copiotroph	0	0	0	0	0	0	0	0	0.000201045	9.10068e-05	4.03934e-05	0.000216339	0.000162318	0.000140784	2.5364e-05	0.00010167	3.72429e-05	0	9.25703e-05	2.09743e-05	0	0	5.01251e-05	0	0	0	0	0
50d5f705c7f4db19acb50e302dce7a59	Bacteria	FCPU426	uncultured bacterium	uncultured bacterium	uncultured bacterium	uncultured bacterium	uncultured bacterium	B16028_uncultured bacterium	Copiotroph	0	0	0	0	0	0	0	0	0	0	0	0	2.02897e-05	0	2.25458e-05	0	0	0	0	0	0	0	0	0	0	0	0	0
50da2a29959775bc4474a143ff9b9642	Bacteria	Armatimonadetes	uncultured bacterium	uncultured bacterium	uncultured bacterium	uncultured bacterium	uncultured bacterium	B5270_uncultured bacterium	Copiotroph	0	0	6.54691e-05	0	0	0	0	0	1.87019e-05	0	0	0	5.86147e-05	5.1194e-05	6.48192e-05	4.02842e-05	0	4.55409e-05	0	0	0	3.8894e-05	4.57664e-05	0	0	0	0	0
522ad2d7b300951d5d80c303b58c8528	Bacteria	Bacteroidetes	Ignavibacteria	Ignavibacteriales	BSV40	unidentified eubacterium clone BSV40	unidentified eubacterium clone BSV40	B2559_unidentified eubacterium clone BSV40	Copiotroph	3.50151e-05	0	8.81315e-05	0	4.05917e-05	0	0.000131344	0	8.64961e-05	6.23565e-05	0	0	0	0	0	0.000149627	0	0	7.63705e-05	0	0	0	0.000518686	0	0	6.10793e-05	0	0
52f50fc1f757030d9333b51888294ba2	Bacteria	Chloroflexi	JG30-KF-CM66	uncultured soil bacterium	uncultured soil bacterium	uncultured soil bacterium	uncultured soil bacterium	B4352_uncultured soil bacterium	Copiotroph	0	0	0	0	0	0	0	0	0	0	0	0	5.41058e-05	0.0003675	0	6.33038e-05	0	0	0	0	0	0	0	0	0	0	0	0
543106f556f056f9eae6ad74f1682aa4	Bacteria	Planctomycetes	Phycisphaerae	Phycisphaerales	AKAU3564 sediment group	#N/A	#N/A	B5009_f_AKAU3564 sediment group	Copiotroph	0	0	0	0	0	0	0	0	8.88338e-05	0.000124713	0.000223352	0	0	0	0	0	0	0	0	0	0	0	0	0	0	0	0	0
5482972314f5f105d41709d9d85071b3	Bacteria	BRC1	metagenome	metagenome	metagenome	metagenome	metagenome	B5113_metagenome	Copiotroph	0	9.70301e-06	0	0	1.9102e-05	0	0	0	0	1.34825e-05	3.80173e-05	0	0.000103703	2.5597e-05	3.6637e-05	0	2.68977e-05	0	0	0	5.60295e-05	9.15154e-05	0	0	0	0	2.1974e-05	8.51899e-06
549181d0a6e58a2887be31258684f6ca	Bacteria	Kiritimatiellaeota	Kiritimatiellae	WCHB1-41	uncultured Verrucomicrobia bacterium	uncultured Verrucomicrobia bacterium	uncultured Verrucomicrobia bacterium	B2496_uncultured Verrucomicrobia bacterium	Copiotroph	0	0	0.000183817	0	0	0	0	0	0.000128575	0	5.46499e-05	0	0.000338162	0.0001225	0.000386097	0	0	0	0	6.50203e-05	0.000185916	0	0	0	0	0	0	0
558381f67fec9736ce6d4f674a3e7f15	Bacteria	Acidobacteria	Acidobacteriia	Solibacterales	Solibacteraceae (Subgroup 3)	GOUTB8	uncultured soil bacterium	B1113_GOUTB8	Copiotroph	0	0	0	0	0	0	0	0	0	0	0	0.000318639	0.000915291	0	0	0.00157108	0	9.33588e-05	0.000388795	0	0.000483892	0.00016244	0	0	0	0	0	0
56ae6b39a76b316106a0ae6bc2b94851	Bacteria	#N/A	#N/A	#N/A	#N/A	#N/A	#N/A	B4465_o_NA	Copiotroph	0	0	0	0	0	0	0	0	9.35093e-06	0	0.000180582	2.85098e-05	0	0	0	0	1.86215e-05	0	0	0	0	0	0	0	0.000309651	0	0	0
56ca650255c26c6221f02a4f22f7ac86	Bacteria	Spirochaetes	Spirochaetia	Spirochaetales	Spirochaetaceae	Spirochaeta 2	uncultured bacterium	B6588_Spirochaeta 2	Copiotroph	0	0	0	0	0	0	0	0	0	0	6.89064e-05	0	0	0	0.000104274	3.83659e-05	0	0	2.31426e-05	0	0	0	0	0	0	0	0	7.45412e-05
56d4e358e73b61a036992793c57ebc31	Bacteria	Patescibacteria	Berkelbacteria	metagenome	metagenome	metagenome	metagenome	B15787_metagenome	Copiotroph	0	0	0	0	0	0	0	0	4.67546e-06	8.42656e-06	0	1.17393e-05	0	0	0	0	0	0	9.25703e-06	0	0	0	0	0	0	0	0	0
56f7a44a766cd83ef027826463b4f542	Bacteria	Actinobacteria	Thermoleophilia	Gaiellales	uncultured	#N/A	#N/A	B174_f_uncultured	Copiotroph	0.00072131	0.00267609	0.000830954	0.00225957	0.000630365	0.000982736	0.000950052	0.00107329	0.00157797	0.00252965	0.00231193	0.00239147	0.000568111	0.00116284	0.000510099	0.00140995	0.00026277	0.00112258	0.00141401	0.000956428	0.00128868	0.00122631	0	0.000849966	0.000198438	0.000186631	0	0.000308814
57756a5b8e2abe01705e4a3a6701118f	Bacteria	Patescibacteria	Parcubacteria	#N/A	#N/A	#N/A	#N/A	B19751_o_NA	Copiotroph	0	0	0	0	0	0	0	0	7.0132e-06	0	7.12824e-06	0	0	0	0	0	0	0	0	0	0	0	0	0	0	0	0	0
57ae03fb15b3f69a191d564727849027	Bacteria	Chloroflexi	Anaerolineae	SBR1031	uncultured bacterium	uncultured bacterium	uncultured bacterium	B4020_uncultured bacterium	Copiotroph	0	0	4.28067e-05	1.51016e-05	0	0	0	0	0	0	4.75216e-06	0	0.00020966	0.000168209	0	3.64476e-05	0	0	1.85141e-05	8.80921e-05	0	9.15154e-06	4.3587e-06	0	1.30838e-05	0	0	0
57d411a28c4931c45cd21326402c2427	Bacteria	Chloroflexi	Anaerolineae	uncultured	uncultured Chloroflexi bacterium	uncultured Chloroflexi bacterium	uncultured Chloroflexi bacterium	B4658_uncultured Chloroflexi bacterium	Copiotroph	0	0	0	0	0	0	0	0	1.63641e-05	0.000234258	0	0.0001023	0	0	0	4.60391e-05	0	0	0	0	0	0	0	0	0	0	0	0
58ac0575f4d1c078bea57052e912a0e8	Bacteria	WS1	uncultured Streptomyces sp.	uncultured Streptomyces sp.	uncultured Streptomyces sp.	uncultured Streptomyces sp.	uncultured Streptomyces sp.	B13348_uncultured Streptomyces sp.	Copiotroph	0	0	0	0	0	0	0	0	2.57151e-05	0	0	0	0	0	0	0	0	0	0	0	0	0	4.14077e-05	0	0	0	0	0
58b59000c873a81b002b294bafb2a87c	Bacteria	Firmicutes	Clostridia	Clostridiales	Heliobacteriaceae	Hydrogenispora	uncultured Firmicutes bacterium	B3716_Hydrogenispora	Copiotroph	0	0	0	0	0	0	0	0	0	0	0.000449079	0	0.000103703	0	0.000135275	0	0	0	0	0	0.00012734	0	0	0	0	0	0	0
593ef3fd791a133526ade2baed6ca0a6	Bacteria	Chloroflexi	SHA-26	uncultured bacterium	uncultured bacterium	uncultured bacterium	uncultured bacterium	B8040_uncultured bacterium	Copiotroph	0	0	0	0	0	0	0	0	0	5.89859e-05	0	0	0.000128501	0	0	0	0	0	0	0	0	0	0	0	0	0	0	0
59a3026479cc7682b23f71159b66e10e	Bacteria	Actinobacteria	Acidimicrobiia	IMCC26256	#N/A	#N/A	#N/A	B1918_o_IMCC26256	Copiotroph	0	0	0	0	0	0	0	0	7.94829e-05	4.21328e-05	7.84107e-05	0	0.00026602	0.000402239	0.000138093	0.000358721	2.27596e-05	2.73245e-05	0	0.000123748	0	0.000121258	4.79457e-05	3.09968e-05	2.83483e-05	2.8843e-05	0	0
5a60e9b4a0417a699801e57143703538	Bacteria	Planctomycetes	Phycisphaerae	MSBL9	SG8-4	uncultured organism	uncultured organism	B5649_uncultured organism	Copiotroph	0	0	0	0	0	0	0	0	4.20792e-05	0.000146622	1.42565e-05	0	0	0	0	0	0	0	0	0	0.000150261	0	0	0	0	0	0	0
5b9abe95e25b8ee6ffe6bdcfffb32bfe	Bacteria	Patescibacteria	Parcubacteria	#N/A	#N/A	#N/A	#N/A	B16849_o_NA	Copiotroph	0	0	0	0	0	0	0	0	0	0	0	0	2.47985e-05	0	0	0	0	0	6.94277e-06	0	0	0	0	0	0	0	0	0
5bf62bf443dd68f26cd49fbdbb7986bc	Bacteria	Chloroflexi	Anaerolineae	Anaerolineales	Anaerolineaceae	RBG-16-58-14	uncultured bacterium	B1970_RBG-16-58-14	Copiotroph	0	0	0	0	0	0	0	0	0	0	0	0	0.00072592	0.00014444	0.000287459	0.00010167	0	0	0	0	0	0.000393516	0	0	9.15869e-05	0	0.000156015	0
5c076ec52dfe2b1f2b5c14669e867273	Bacteria	Planctomycetes	Planctomycetacia	Isosphaerales	Isosphaeraceae	Singulisphaera	#N/A	B2184_Singulisphaera	Copiotroph	9.33735e-06	0	0	0	0	0	6.56718e-06	8.51816e-06	0	0	4.27695e-05	0	0.000392267	0.000149925	0.000163457	5.94672e-05	6.20716e-06	0.000236813	0.000229112	0.000144723	2.5468e-05	0.00011897	0	0	1.30838e-05	2.3753e-05	0	2.76867e-05
5d6aedf247a2b185826d55150daacc62	Bacteria	Planctomycetes	Phycisphaerae	Tepidisphaerales	WD2101 soil group	#N/A	#N/A	B523_f_WD2101 soil group	Copiotroph	0	0	0.000105758	0.000109486	0.000348611	0.000261211	0.000100697	0	0.000619499	0.00037751	0.000926672	0.000375659	0.00105056	0.000162724	0.000405825	0.000141954	0.000208974	0.000188995	0.000194398	0.000643911	0.000878645	0.000292849	0.000664702	0.00085486	0.000359806	0.0002528	0.000538362	0.000487712
5d6f05fc717018419613f0c71640a228	Bacteria	Planctomycetes	Phycisphaerae	Tepidisphaerales	WD2101 soil group	uncultured Planctomycetia bacterium	uncultured Planctomycetia bacterium	B8715_uncultured Planctomycetia bacterium	Copiotroph	0	0	0	0	0	0	0	0	0.000184681	0	0	0	0	0	0	0	0	0	0	0	0	0	0	0	0	0	0	0
5d8125df57e510823f1deea0ff94fc2e	Bacteria	Chloroflexi	JG30-KF-CM66	uncultured bacterium	uncultured bacterium	uncultured bacterium	uncultured bacterium	B3252_uncultured bacterium	Copiotroph	0	0	0	0	0	0	0	0	0	0	0	0	0.000444119	9.50746e-05	0.000197276	0.000122771	0	0	1.38855e-05	3.14614e-05	0	0	0	0	0	0	0	0
5dde54302c9ba58887edd62220e9c9c6	Bacteria	Planctomycetes	#N/A	#N/A	#N/A	#N/A	#N/A	B16282_o_NA	Copiotroph	0	0	0	0	0	0	0	0	0	6.74125e-06	1.90087e-05	0	9.01764e-06	0	0	0	0	0	0	0	0	0	0	0	0	0	0	0
5df50f4e345e4e50465a80b87fddb7c0	Bacteria	Omnitrophicaeota	uncultured bacterium	uncultured bacterium	uncultured bacterium	uncultured bacterium	uncultured bacterium	B9603_uncultured bacterium	Copiotroph	0	0	0	0	0	0	0	0	8.88338e-05	3.70769e-05	0	0	0	0	0	0	0	0	1.15713e-05	0	0	0	0	0	0	0	0	0
5e7dc172a50c737b010aae4dad9644ff	Bacteria	Proteobacteria	Deltaproteobacteria	Syntrophobacterales	Syntrophaceae	Desulfobacca	#N/A	B4055_Desulfobacca	Copiotroph	0	0	0	0	0	0	0	0	0	0	0	0	0	0	0.000391734	0	0	0	0	0	0	0	0.000326903	0	0	0	0	0
5e7e3880943c368c45d732c56f6088da	Bacteria	Chloroflexi	Anaerolineae	SBR1031	anaerobic bacterium MO-CFX2	anaerobic bacterium MO-CFX2	anaerobic bacterium MO-CFX2	B10537_anaerobic bacterium MO-CFX2	Copiotroph	0	0	0	0	0	0	0	0	0	0	0	0	1.80353e-05	0	1.12729e-05	4.41208e-05	0	0	4.39709e-05	0	0	0	0	0	0	0	0	0
60550ca6eb77925ff71f93b63a2a8ea7	Bacteria	Omnitrophicaeota	uncultured bacterium	uncultured bacterium	uncultured bacterium	uncultured bacterium	uncultured bacterium	B17832_uncultured bacterium	Copiotroph	0	0	0	0	0	0	0	0	0	0	4.75216e-06	1.50934e-05	0	0	0	0	0	0	0	0	0	0	0	0	0	0	0	0
615a6c36cef229239ccc2ac440b4c3ef	Bacteria	Proteobacteria	Deltaproteobacteria	SAR324 clade(Marine group B)	uncultured soil bacterium	uncultured soil bacterium	uncultured soil bacterium	B12768_uncultured soil bacterium	Copiotroph	0	0	0	0	0	0	0	0	0	1.68531e-05	0	0	3.60706e-05	0	0	0	0	0	0	0	0	1.83031e-05	0	0	0	0	0	0
61911b1646c41acc1653d8edb5a29743	Bacteria	Proteobacteria	Deltaproteobacteria	Syntrophobacterales	Syntrophaceae	Desulfomonile	#N/A	B16854_Desulfomonile	Copiotroph	0	0	0	0	0	0	0	0	3.27283e-05	0	0	0	0	0	0	0	0	0	0	0	0	0	0	0	0	0	0	0
627978c5d9e74e1feb71a448677b92ea	Bacteria	Chlamydiae	Chlamydiae	Chlamydiales	Simkaniaceae	uncultured	#N/A	B12893_uncultured	Copiotroph	0	0	0	0	0	0	0	0	0	0	0	0	0	0	0	0	0	0	0	0	0	0	7.19186e-05	0	0	0	0	0
627c77e998793b6e87ba978e3817db01	Bacteria	Actinobacteria	Thermoleophilia	Solirubrobacterales	Solirubrobacteraceae	Conexibacter	#N/A	B6978_Conexibacter	Copiotroph	0	0	0	0	0	0	0	0	0	0	0.000106924	0.000122424	0	0	0	0	0	0	0	0	0	0	0	0	0	0	0	0
6289a810c0caba0644972cba4b68e4ab	Bacteria	Patescibacteria	Gracilibacteria	Candidatus Peregrinibacteria	metagenome	metagenome	metagenome	B3620_metagenome	Copiotroph	0	0	5.03608e-05	0	1.19387e-05	0	0	0	0	0	0	0	0.000225441	0.00014444	0.000118366	0.000120853	2.48286e-05	0	9.25703e-06	0	2.5468e-05	0	0	1.79455e-05	0	0	0	0
62bb0be9e514eb68da7ed7ab07145e2c	Bacteria	Omnitrophicaeota	uncultured bacterium	uncultured bacterium	uncultured bacterium	uncultured bacterium	uncultured bacterium	B6480_uncultured bacterium	Copiotroph	0	0	0	0	0	0	0	0	0	0	0	0	7.21411e-05	5.1194e-05	0.000107093	0	0	8.42506e-05	0	0	0	0	0	0	0	0	0	0
6367566307012ebe4b770abba4a5fe9f	Bacteria	Spirochaetes	Spirochaetia	Spirochaetales	Spirochaetaceae	#N/A	#N/A	B8622_f_Spirochaetaceae	Copiotroph	0	0	0	0	0	0	0	0	0	0	0	0	2.02897e-05	0	6.76375e-05	6.13855e-05	0	0	0	0	0	0	3.48696e-05	0	0	0	0	0
63e51fd52b18a4f53ab754103caa2f5f	Bacteria	Proteobacteria	Gammaproteobacteria	#N/A	#N/A	#N/A	#N/A	B13898_o_NA	Copiotroph	0	0	0	0	0	0	0	0	2.10396e-05	0	2.37608e-05	0	0	0	0	0	0	0	1.85141e-05	0	0	0	0	0	0	0	0	0
6424fffb9a4da77579f0297b9e3101f7	Bacteria	Planctomycetes	Phycisphaerae	mle1-8	uncultured delta proteobacterium	uncultured delta proteobacterium	uncultured delta proteobacterium	B2429_uncultured delta proteobacterium	Copiotroph	0	0	3.77706e-05	0	0	8.58524e-05	0	0	0.000142602	0.000203923	0	6.20508e-05	2.25441e-05	0.000215746	0	0.00019183	0	0	0	0.000123748	0.000140074	0	0	0	0	0	0	2.12975e-05
64580ef060199de8bf0d348e384f1ada	Bacteria	Planctomycetes	Pla4 lineage	uncultured Planctomycetaceae bacterium	uncultured Planctomycetaceae bacterium	uncultured Planctomycetaceae bacterium	uncultured Planctomycetaceae bacterium	B14649_uncultured Planctomycetaceae bacterium	Copiotroph	0	0	0	0	0	0	0	0	7.0132e-06	0	4.75216e-06	1.50934e-05	1.35265e-05	0	0	0	0	0	0	0	0	6.86365e-06	0	0	0	0	0	0
648d0c901d7942f277a3f3c182da548b	Bacteria	Proteobacteria	Deltaproteobacteria	Myxococcales	#N/A	#N/A	#N/A	B8138_o_Myxococcales	Copiotroph	0	0	0	0	0	0	0	0	0	0	0	0	0.000117229	6.94776e-05	0	0	0	0	0	0	0	0	0	0	0	0	0	0
64e42baf9358c7528508356f43d86b83	Bacteria	Proteobacteria	Deltaproteobacteria	Syntrophobacterales	Syntrophobacteraceae	Syntrophobacter	#N/A	B109_Syntrophobacter	Copiotroph	0	0	0	0	0.000728263	8.95057e-05	0.000785873	0	0.00548666	0.00535087	0.00617068	0.00518543	0.000232204	6.58209e-05	0.000403006	0.00147517	0.00241665	0	0.00542462	0.00242463	0.000450783	0.000224213	0.0026392	0.00273425	0.00119717	0.000909402	0.000437282	0.0017038
65796ab57e5c5d86fad6e888fbef51ab	Bacteria	Hydrogenedentes	Hydrogenedentia	Hydrogenedentiales	Hydrogenedensaceae	#N/A	#N/A	B13899_f_Hydrogenedensaceae	Copiotroph	0	0	0	0	0	0	0	0	1.87019e-05	0	3.32651e-05	0	0	9.14179e-06	0	0	0	0	0	0	0	0	0	0	0	0	0	0
657e2219950e5c245d09bc5fe3b6a18a	Bacteria	Planctomycetes	Planctomycetacia	Isosphaerales	Isosphaeraceae	Candidatus Nostocoida	uncultured bacterium	B5553_Candidatus Nostocoida	Copiotroph	0	0	0	0	0	0	0	0	0	0	0	0	0.000196134	0	0.000248004	0	0	0	0	0	0	0	0	0	0	0	0	0
6602351996b2ec1d4f34374f7f7fe0c3	Bacteria	Patescibacteria	Gracilibacteria	Candidatus Peregrinibacteria	metagenome	metagenome	metagenome	B9148_metagenome	Copiotroph	0	0	0	0	0	0	0	0	0	0	0	0	0.000121738	7.31343e-06	0	0	0	0	0	0	0	3.20304e-05	0	0	0	0	0	0
6771ec49ebba200f14730662c2f0dcc6	Bacteria	Latescibacteria	uncultured bacterium	uncultured bacterium	uncultured bacterium	uncultured bacterium	uncultured bacterium	B4124_uncultured bacterium	Copiotroph	0	0	0	6.79571e-05	5.01427e-05	0	0	0	6.54565e-05	1.68531e-05	3.56412e-05	0	5.63603e-05	0.000137127	6.76375e-05	2.49378e-05	0	0	0	2.30717e-05	0	0	0	0	0	0	5.27375e-05	0
68175934ec96b33cb5c1bd31b8620b87	Bacteria	#N/A	#N/A	#N/A	#N/A	#N/A	#N/A	B12502_o_NA	Copiotroph	0	0	0	0	0	0	0	0	0	0	1.42565e-05	0	2.25441e-05	3.65671e-05	0	0	0	0	0	0	0	0	0	0	0	0	0	0
6844f9f266f1bc749339fa2aac103458	Bacteria	Chloroflexi	Anaerolineae	SBR1031	uncultured Gemmatimonadetes bacterium	uncultured Gemmatimonadetes bacterium	uncultured Gemmatimonadetes bacterium	B4409_uncultured Gemmatimonadetes bacterium	Copiotroph	0	0	0	0	0	0	0	0	0	0	0	0	0.000146537	1.64552e-05	9.01833e-05	4.79574e-05	0	6.14802e-05	0	0.0001636	0	0	0	0	0	0	3.73557e-05	0
689a4796005c15ee43487cdf9aa790fc	Bacteria	Armatimonadetes	DG-56	uncultured bacterium	uncultured bacterium	uncultured bacterium	uncultured bacterium	B4328_uncultured bacterium	Copiotroph	0	0	0	0	0	0	0	0	5.14301e-05	0	6.41542e-05	0.00014758	0	0	0	0	0	0	2.54568e-05	0	0.000203744	5.9485e-05	0	0	0	0	1.31844e-05	0
68fc9c4a2772d1d1083cb700191620c3	Bacteria	Chloroflexi	Anaerolineae	SJA-15	#N/A	#N/A	#N/A	B407_o_SJA-15	Copiotroph	0	0	0	0	0	0	0.000781495	0	0.000841584	0.00320209	0	0.000357211	0.00151722	0	0.00071583	0	0.000794516	0	0	0.00044046	0	0	0.00176963	0	0.000708708	0	0.000771286	0.00123312
69b19c4f3647aa56a5e87c5967275ce9	Bacteria	Proteobacteria	Gammaproteobacteria	Coxiellales	Coxiellaceae	Coxiella	uncultured hydrocarbon seep bacterium BPC023	B17842_Coxiella	Copiotroph	0	0	0	0	0	0	0	0	0	0	0	0	2.02897e-05	0	5.63645e-06	0	0	0	0	0	0	0	0	0	0	0	0	0
6a238219fb48804426cf83b71e92459b	Bacteria	Bacteroidetes	Ignavibacteria	OPB56	uncultured bacterium KF-JG30-B11	uncultured bacterium KF-JG30-B11	uncultured bacterium KF-JG30-B11	B8139_uncultured bacterium KF-JG30-B11	Copiotroph	0	0	0	0	0	0	0	0	0	0	0	0	0.000112721	6.58209e-05	0	0	0	0	0	0	0	0	0	0	0	0	8.78959e-06	0
6a295dc6b93bb85414b7be73785f392f	Bacteria	Chlamydiae	Chlamydiae	Chlamydiales	Simkaniaceae	uncultured	#N/A	B5340_uncultured	Copiotroph	0	0	0	0	0	0	0	0	0	0	0	2.85098e-05	0	1.64552e-05	4.79099e-05	0.000199503	0	0	0	0	4.83892e-05	4.57577e-05	0	0	0	0	0	0
6b1ab2bfc0e6e4f2670189764e1b8ae0	Bacteria	Spirochaetes	Spirochaetia	Brevinematales	Brevinemataceae	Brevinema	uncultured bacterium	B9150_Brevinema	Copiotroph	0	0	0	0	0	0	0	0	0	0	0	0	0.000108212	0	1.69094e-05	0	0	0	0	0	0	4.11819e-05	0	0	0	0	0	0
6b1adacc3fbb701cce946ec23064ceee	Bacteria	Chloroflexi	Ktedonobacteria	Ktedonobacterales	Ktedonobacteraceae	Ktedonobacter	#N/A	B8837_Ktedonobacter	Copiotroph	0	0	0	0	0	0	0	0	0	0	0	0	2.47985e-05	0	9.8638e-05	2.68561e-05	0	0	0	3.56563e-05	0	0	0	0	0	0	0	0
6c47f1684aaa599dd2b8386f159c5019	Bacteria	WOR-1	uncultured bacterium	uncultured bacterium	uncultured bacterium	uncultured bacterium	uncultured bacterium	B10013_uncultured bacterium	Copiotroph	0	0	0	0	0	0	0	0	0	0	0	0	3.15617e-05	0	0.000129638	0	0	0	0	0	0	0	0	0	0	0	0	0
6cb972d5f51112a1ac56470b9be57c97	Bacteria	Chloroflexi	Anaerolineae	Anaerolineales	Anaerolineaceae	uncultured	#N/A	B11257_uncultured	Copiotroph	0	0	0	0	0	0	0	0	0	0	0	0	6.76323e-05	0	4.50916e-05	0	0	0	0	0	0	0	0	0	0	0	0	0
6ceef4c39576342d2856bf459db3b4f2	Bacteria	Proteobacteria	Alphaproteobacteria	Azospirillales	Azospirillaceae	Azospirillum	#N/A	B567_Azospirillum	Copiotroph	0	0	0	0	0	0	0	0	1.16887e-05	0	4.98977e-05	3.3541e-05	0.000412557	0.000404067	0.000417098	0.0001573	0	0	0.00335336	0.00379425	0.000781867	0.000533077	2.17935e-05	0	8.72256e-05	0	0	0
6d038ffdb72743f7fba023648b2fdaef	Bacteria	Latescibacteria	uncultured bacterium	uncultured bacterium	uncultured bacterium	uncultured bacterium	uncultured bacterium	B13700_uncultured bacterium	Copiotroph	0	0	0	0	0	0	0	0	0	0	3.56412e-05	1.34164e-05	0	0	0	0	0	0	1.15713e-05	0	0	0	0	0	0	0	0	0
6d1aa9ec7ecc7983a2828f2dbf4d3177	Bacteria	Chloroflexi	Dehalococcoidia	MSBL5	#N/A	#N/A	#N/A	B13193_o_MSBL5	Copiotroph	0	0	0	0	0	0	0	0	0	0	0	5.19885e-05	0	0	0	0	0	0	0	0	0	0	0	0	0	0	0	0
6db1d39a25eed96f0a40380a3bc61360	Bacteria	Chloroflexi	Ktedonobacteria	B12-WMSP1	uncultured bacterium	uncultured bacterium	uncultured bacterium	B9202_uncultured bacterium	Copiotroph	0	0	0	0	0	0	0	0	0	0	1.66326e-05	0	2.25441e-05	0	3.10005e-05	4.79574e-05	0	0	4.16566e-05	0	0	0	0	0	0	0	0	0
6dce085e2e89fa92bf31e9b36a26f136	Bacteria	#N/A	#N/A	#N/A	#N/A	#N/A	#N/A	B10101_o_NA	Copiotroph	0	0	0	0	1.9102e-05	0	0	0	1.87019e-05	0	0	0	6.98867e-05	0	0	0	0	0	0	0	0	0	0	0	0	0	0	2.5557e-05
6e07b19726d9c3acca024791777a6fea	Bacteria	TA06	#N/A	#N/A	#N/A	#N/A	#N/A	B1771_o_NA	Copiotroph	0	0	6.79871e-05	0	0	0	0.00016418	0	0	6.23565e-05	0	0.000350503	0.000473426	0.000274254	0.000267732	4.60391e-05	7.44859e-05	1.82163e-05	0	0	7.64039e-05	0	3.92283e-05	0	0	0	9.66854e-05	0
6e87c7082bc62974422c709a882a9117	Bacteria	Gemmatimonadetes	Gemmatimonadetes	Gemmatimonadales	Gemmatimonadaceae	uncultured	#N/A	B8771_uncultured	Copiotroph	0	0	0	0	0	0	0	0	0	0	9.26672e-05	6.54049e-05	0	0	0	0	0	0	0	0	0	0	0	0	0	0	0	0
6f616862cb5c44cb1ab633c0d872a328	Bacteria	WPS-2	uncultured bacterium	uncultured bacterium	uncultured bacterium	uncultured bacterium	uncultured bacterium	B6481_uncultured bacterium	Copiotroph	0	0	0	0	0	0	0	0	1.40264e-05	0	0	0	0	0	0	0	0	0	0.000115713	0.000151015	0	1.60152e-05	0	0	0	0	0	0
6f9237069ef8c677d7e112a8e51195f3	Bacteria	Chloroflexi	Anaerolineae	Anaerolineales	Anaerolineaceae	uncultured	#N/A	B1938_uncultured	Copiotroph	0	0	0	0	0	0	0	0	0	0	0	0	0.000895001	0	0.000214185	0.000293499	0	0	0.000240683	0.000266374	0	0	0	0	0	0	0	0
6fcbf179bc34d4e9c7dfb13915b406dc	Bacteria	Verrucomicrobia	Verrucomicrobiae	Chthoniobacterales	Chthoniobacteraceae	uncultured Verrucomicrobia bacterium	uncultured Verrucomicrobia bacterium	B3159_uncultured Verrucomicrobia bacterium	Copiotroph	1.4006e-05	0	0	0	2.38775e-05	0	0	0	4.67546e-05	0	7.12824e-05	6.03737e-05	9.01764e-05	0	5.91828e-05	1.72647e-05	0	0	1.85141e-05	2.9364e-05	7.13103e-05	3.43183e-05	6.75599e-05	0	3.0529e-05	0.000183238	3.95531e-05	4.04652e-05
70087c25c1ea97b4aaf8099276cb14a9	Bacteria	Planctomycetes	Phycisphaerae	Phycisphaerales	AKAU3564 sediment group	uncultured organism	uncultured organism	B1849_uncultured organism	Copiotroph	0	0	0.000120866	0.00013969	7.16324e-05	7.12393e-05	6.12937e-05	0	2.57151e-05	7.5839e-05	0.00012118	0	0.000225441	0.00015541	0.00012682	3.64476e-05	5.37954e-05	5.0095e-05	4.62852e-05	4.61435e-05	8.14975e-05	7.09244e-05	0.000150375	0	5.01547e-05	3.73262e-05	3.73557e-05	0.000106487
713701dcd575726c6d966729f914793c	Bacteria	#N/A	#N/A	#N/A	#N/A	#N/A	#N/A	B20267_o_NA	Copiotroph	0	0	0	0	0	0	0	0	0	0	0	0	4.50882e-06	0	8.45468e-06	0	0	0	0	0	0	0	0	0	0	0	0	0
71691ea1ee6ca807d17f8c1c6361f78e	Bacteria	Patescibacteria	Saccharimonadia	Saccharimonadales	#N/A	#N/A	#N/A	B5365_o_Saccharimonadales	Copiotroph	5.83584e-05	0	0	0	0	0	0	0	3.5066e-05	2.6965e-05	0.000102172	8.38524e-06	0	0	6.2001e-05	0	7.44859e-05	0	0	2.72666e-05	1.52808e-05	0	0	0	8.72256e-06	0	0	0
71cda8d14a122afc9e566c239c5da9d2	Bacteria	Kiritimatiellaeota	Kiritimatiellae	WCHB1-41	#N/A	#N/A	#N/A	B14855_o_WCHB1-41	Copiotroph	0	0	0	0	0	0	0	0	0	0	0	0	2.47985e-05	0	3.10005e-05	0	0	0	0	0	0	0	0	0	0	0	0	0
728e6dab48cc95d6988f934eee79ea99	Bacteria	Spirochaetes	Spirochaetia	Brevinematales	Brevinemataceae	Brevinema	uncultured bacterium	B14090_Brevinema	Copiotroph	0	0	0	0	0	0	0	0	1.87019e-05	0	0	0	0	3.29104e-05	0	0	0	0	0	0	0	0	0	0	0	0	0	0
729384f791aa26826bfa81b2cd32f2fe	Bacteria	Planctomycetes	Planctomycetacia	Gemmatales	Gemmataceae	uncultured	uncultured bacterium	B11591_uncultured	Copiotroph	0	0	0	0	0	0	0	0	9.35093e-06	0	4.51455e-05	0	0	0	0	0	0	0	0	0	0	0	0	0	0	0	0	4.2595e-05
7344c8fd1fdb4ee5c8a5233c9383a34d	Bacteria	Chloroflexi	Anaerolineae	Anaerolineales	Anaerolineaceae	#N/A	#N/A	B159_f_Anaerolineaceae	Copiotroph	0.000170407	0.000188238	0.00160651	0.00230865	0	0	0	0.00110736	0.00251072	0.00209821	0.000734209	0.000377336	0.00224539	0.00175888	0.00120902	0.00296185	0.000204836	0.000995068	0.00160841	0.000316712	0.000402394	0.00126291	0.00162798	0.00192017	0.00156352	0.00259587	0	0.00193594
734a5b7cbfe0f5a61c0d09699d7bb833	Bacteria	Proteobacteria	Deltaproteobacteria	Deltaproteobacteria Incertae Sedis	Syntrophorhabdaceae	Syntrophorhabdus	uncultured delta proteobacterium	B1805_Syntrophorhabdus	Copiotroph	0	0	0	0	6.68569e-05	0	0.000105075	0	0.00040209	0.000438181	0	0	0	0	0.000171912	0	0	0	0	0	0	0	0	0	0	0	0	0.000792266
7391d05d703948a358566e6bb8d7fc75	Bacteria	Proteobacteria	Gammaproteobacteria	PLTA13	#N/A	#N/A	#N/A	B13905_o_PLTA13	Copiotroph	0	0	0	0	0	0	0	0	0	0	4.03934e-05	0	0	0	0	0	0	0	0	0	0	2.28788e-05	0	0	0	0	0	0
73dc82d361c5784c1e5ba697eef66306	Bacteria	Spirochaetes	Spirochaetia	Spirochaetales	Spirochaetaceae	Spirochaeta 2	Spirochaeta sp.	B5450_Spirochaeta 2	Copiotroph	0	0	0	0	0	0	0	0	0.000130913	0.000168531	0	0	0	0	0	0	0	0	0	0	0	0	5.44838e-05	0	0	0	0	0
748ec1339ec664aca78c793b06d940b9	Bacteria	Proteobacteria	Gammaproteobacteria	HOC36	uncultured soil bacterium	uncultured soil bacterium	uncultured soil bacterium	B225_uncultured soil bacterium	Copiotroph	0	3.68714e-05	0	0	0.000343835	0.00111973	5.25374e-05	1.49068e-05	0.00229332	0.00297626	0.00171791	0.00102132	0.00208758	0.00268586	0.00239549	0.00263958	2.68977e-05	0	0.000661878	0.000738295	0.00131415	0.00168846	7.84567e-05	0.000259394	5.66966e-05	0.00027825	0	1.7038e-05
75de9a36fe8e78a8913079054a39f08b	Bacteria	Proteobacteria	Deltaproteobacteria	Oligoflexales	0319-6G20	#N/A	#N/A	B17856_f_0319-6G20	Copiotroph	0	0	0	0	0	0	0	0	0	0	0	0	1.12721e-05	0	1.69094e-05	0	0	0	0	0	0	0	0	0	0	0	0	0
7624db399c1a0ceef29420fb61c6ed37	Bacteria	Proteobacteria	Deltaproteobacteria	Oligoflexales	0319-6G20	marine metagenome	marine metagenome	B12356_marine metagenome	Copiotroph	0	0	0	0	0	0	0	0	3.97414e-05	0	0	0	0	1.64552e-05	0	0	0	0	0	0	0	0	2.39729e-05	0	0	0	0	0
7671ecdd0568c410a0d3048783537f6e	Bacteria	Chloroflexi	Dehalococcoidia	#N/A	#N/A	#N/A	#N/A	B827_o_NA	Copiotroph	0.000121386	9.89707e-05	0.000455766	0.000668245	8.35711e-05	0.000273997	5.03484e-05	7.66634e-05	0.000542354	0.000193811	0.00012118	0.000446095	0.000568111	0.000341903	0.000332551	0.000324192	0.000217251	0.000234535	2.77711e-05	2.9364e-05	0.000165542	0.000201334	7.84567e-05	3.09968e-05	5.01547e-05	3.39329e-05	0	5.9633e-05
7689b6de29df5dc24aa50345e2f029af	Bacteria	Chloroflexi	Anaerolineae	Anaerolineales	Anaerolineaceae	#N/A	#N/A	B3316_f_Anaerolineaceae	Copiotroph	0	0	0.000234178	0	0	0	0	0	3.03905e-05	0.000138196	4.51455e-05	0	0	0	5.63645e-05	0	0	0	0.000166627	0	6.36699e-05	0	0	0	0	0	0	0.000149082
773d453bb1bd61703b01a28c6c233364	Bacteria	Acidobacteria	Subgroup 25	uncultured Acidobacteria bacterium	uncultured Acidobacteria bacterium	uncultured Acidobacteria bacterium	uncultured Acidobacteria bacterium	B10957_uncultured Acidobacteria bacterium	Copiotroph	0	0	0	0	0	0	0	0	0.000114549	0	0	0	0	0	0	0	0	0	0	0	0	0	0	0	0	0	0	0
7750ccf3a43747b723d8f3a4f7802349	Bacteria	Proteobacteria	Deltaproteobacteria	Myxococcales	#N/A	#N/A	#N/A	B8888_o_Myxococcales	Copiotroph	0	0	0	0	0	0	0	0	0.000177668	0	0	0	0	0	0	0	0	0	0	0	0	0	0	0	0	0	0	0
7765bb748dcaff85e3e557578d09e214	Bacteria	Chloroflexi	Chloroflexia	Chloroflexales	Herpetosiphonaceae	Herpetosiphon	uncultured Chloroflexi bacterium	B6590_Herpetosiphon	Copiotroph	0	0	0	0	0	0	0	0	0	0	3.08891e-05	1.00623e-05	2.02897e-05	1.46269e-05	0.000186003	5.1794e-05	0	0	0	0	5.09359e-06	0	0	0	0	0	0	0
778b0e24f65c9790390919a8bdabfceb	Bacteria	Chloroflexi	Ktedonobacteria	Ktedonobacterales	Ktedonobacteraceae	HSB OF53-F07	uncultured bacterium	B201_HSB OF53-F07	Copiotroph	0.000305798	0.000186298	0.000805773	0.000388866	0	0	0	0	0	0	0.000220976	0.000100623	0.00535422	0.00663145	0.00215313	0.00290622	0	0.000633018	0.00102059	0.00450947	0.000269961	0.00135672	0	0	0.000471018	0.000140822	0.00021974	0
7794bcaa3da0cf073c6abb7d4040139b	Bacteria	Bacteroidetes	Bacteroidia	Bacteroidales	Paludibacteraceae	uncultured	uncultured soil bacterium	B13359_uncultured	Copiotroph	0	0	0	0	0	0	0	0	0	0	3.56412e-05	0	0	0	4.22734e-05	0	0	0	0	0	0	0	0	0	0	0	0	0
784a17c140a564804b0e9ac7dad399f8	Bacteria	Planctomycetes	#N/A	#N/A	#N/A	#N/A	#N/A	B4633_o_NA	Copiotroph	0	0	0	0	0	0	0	0	7.94829e-05	0	0	1.50934e-05	4.73426e-05	5.1194e-05	0.000129638	8.4405e-05	0	0	0	0	3.05616e-05	7.32123e-05	0	0	0	0	1.53818e-05	0
785950324d328595c841dfc79e39e895	Bacteria	Latescibacteria	uncultured soil bacterium PBS-III-30	uncultured soil bacterium PBS-III-30	uncultured soil bacterium PBS-III-30	uncultured soil bacterium PBS-III-30	uncultured soil bacterium PBS-III-30	B1958_uncultured soil bacterium PBS-III-30	Copiotroph	0.000224096	0	0	0	0	0	0	4.89794e-05	0.000334296	6.90978e-05	0	0	0	0	0.000202912	0	0	5.2372e-05	7.86848e-05	0	0.000244493	8.23638e-05	0.000152555	8.15706e-05	0	0	9.44881e-05	0.00025344
78fd93bb3e239ac367c3b1171a8f2dce	Bacteria	Chloroflexi	Anaerolineae	Anaerolineales	Anaerolineaceae	Anaerolinea	#N/A	B708_Anaerolinea	Copiotroph	0	0	0	0	0	0	0	0	0	0	0	0	0.00223412	0.00273157	0.00092156	0.00116824	0	0	0	0	0	0	0	0	0	0	0	0
7988b1e54b2a4c9a8040e6b94aacbb7c	Bacteria	Chloroflexi	TK10	uncultured bacterium	uncultured bacterium	uncultured bacterium	uncultured bacterium	B4239_uncultured bacterium	Copiotroph	0	0	9.56856e-05	2.45401e-05	0	0	0	0	0	0	0	0	0.000112721	4.20522e-05	0.000200094	0.000132362	0	0	0	0	1.2734e-05	0	0	0	0	0	0	0
7a07060dc2ecd7c92cf73e2e0de8dc72	Bacteria	Chloroflexi	Ktedonobacteria	Ktedonobacterales	Ktedonobacteraceae	#N/A	#N/A	B3282_f_Ktedonobacteraceae	Copiotroph	0	0	0	0	0	0	0	0	0	0	0	0	0.000123993	6.58209e-05	3.10005e-05	5.1794e-05	0	0	0.000270768	0.000127943	3.31084e-05	8.23638e-05	0	0	3.92515e-05	2.71463e-05	2.1974e-05	0
7a07a27e7cf0d0a8b4db5b5fbb69c766	Bacteria	Proteobacteria	Gammaproteobacteria	Diplorickettsiales	Diplorickettsiaceae	uncultured	uncultured bacterium	B9154_uncultured	Copiotroph	0	0	0	0	0	0	0	0	0	0	0	0	2.70529e-05	2.01119e-05	1.40911e-05	7.28952e-05	1.24143e-05	0	0	0	0	0	0	0	0	0	0	0
7aab5008a1f46b2cb0d4b6e3c3a154c6	Bacteria	Planctomycetes	Phycisphaerae	Phycisphaerales	AKAU3564 sediment group	#N/A	#N/A	B8044_f_AKAU3564 sediment group	Copiotroph	0	0	0	0	0	0	0	0	0	0	6.89064e-05	6.37278e-05	0	0	0	0	0	0	0	0	0	0	5.44838e-05	0	0	0	0	0
7b3dd7dc21df94a10ac388967d3fd195	Bacteria	#N/A	#N/A	#N/A	#N/A	#N/A	#N/A	B2465_o_NA	Copiotroph	2.33434e-05	0	1.51083e-05	0	2.14897e-05	2.00931e-05	0	0	0.000135588	0	0.000206719	0.000125779	8.56676e-05	0	0.000152184	2.49378e-05	0.000339325	2.04934e-05	0	6.29229e-06	0	2.28788e-05	1.96142e-05	0	4.14322e-05	0	5.27375e-05	4.47247e-05
7b9f274e26266ccd440987b9d82414bb	Bacteria	Planctomycetes	Planctomycetacia	Isosphaerales	Isosphaeraceae	uncultured	uncultured Isosphaera sp.	B8224_uncultured	Copiotroph	0	0	0	0	7.16324e-06	0	0	0	0	0	9.74193e-05	0	0	0	3.94552e-05	2.49378e-05	0	0	3.93424e-05	0	0	0	0	0	0	0	0	0
7c707d94f2343deaf27367c083f01d3d	Bacteria	Planctomycetes	Phycisphaerae	Phycisphaerales	Phycisphaeraceae	uncultured	uncultured bacterium	B11386_uncultured	Copiotroph	0	0	0	0	0	0	0	0	0	0	0	3.85721e-05	0	3.47388e-05	0	0	0	0	0	0	0	0	6.53806e-06	0	0	0	0	0
7d0d098fa603987f95ac2c1329360da3	Bacteria	Proteobacteria	Gammaproteobacteria	Betaproteobacteriales	#N/A	#N/A	#N/A	B367_o_Betaproteobacteriales	Copiotroph	0	0	0	0	0.00239013	0.000173532	0	0	0	0	0	0	0.00508369	0.00366586	0	0.000237869	0	0.000573815	0	0	0	0	0.00224473	0	0.000859172	0.000195114	0	0
7d14f43230479cc9dba8543e5f37b0d8	Bacteria	Chloroflexi	Anaerolineae	Anaerolineales	Anaerolineaceae	uncultured	#N/A	B2182_uncultured	Copiotroph	0	0	0	0	0	0	0	0	0.000542354	6.74125e-05	3.08891e-05	0	1.80353e-05	0	0	0	0	0	0	6.29229e-05	0.000738571	0.000249379	4.3587e-06	0	4.57934e-05	0	0	0
7d18d2968c2af8485173fd1daecd7c3c	Bacteria	Verrucomicrobia	Verrucomicrobiae	Pedosphaerales	Pedosphaeraceae	#N/A	#N/A	B19808_f_Pedosphaeraceae	Copiotroph	0	0	0	0	0	0	0	0	7.0132e-06	0	7.12824e-06	0	0	0	0	0	0	0	0	0	0	0	0	0	0	0	0	0
7d65410ed452dcd95128943769cb07b3	Bacteria	Planctomycetes	Planctomycetacia	Gemmatales	Gemmataceae	uncultured	#N/A	B13201_uncultured	Copiotroph	0	0	0	0	0	0	0	0	3.27283e-05	0	0	0	3.8325e-05	0	0	0	0	0	0	0	0	0	0	0	0	0	0	0
7d8361db70ea91561a4dfb6bffeb0481	Bacteria	Acidobacteria	Subgroup 6	Unknown Order	Unknown Family	Vicinamibacter	#N/A	B3858_Vicinamibacter	Copiotroph	0	0	0	0	0	0	0	0	0.000472222	0	0	0.000187829	0	0	0	0	0	0	0	0	0	0	0	0	0	0	0	0
7def111eae0c3d641bc7669f882d7584	Bacteria	Kiritimatiellaeota	Kiritimatiellae	WCHB1-41	uncultured soil bacterium PBS-III-20	uncultured soil bacterium PBS-III-20	uncultured soil bacterium PBS-III-20	B9086_uncultured soil bacterium PBS-III-20	Copiotroph	0	0	0	0	0	0	0	0	7.24697e-05	0	9.97954e-05	0	0	0	0	0	0	0	0	0	0	0	0	0	0	0	0	0
7e49d0c48d62d90e07795b1491ac9a48	Bacteria	Verrucomicrobia	Verrucomicrobiae	S-BQ2-57 soil group	uncultured Verrucomicrobiaceae bacterium	uncultured Verrucomicrobiaceae bacterium	uncultured Verrucomicrobiaceae bacterium	B4781_uncultured Verrucomicrobiaceae bacterium	Copiotroph	0	0	6.79871e-05	0	0	0	0	0	4.44169e-05	0	0	0	4.05794e-05	0.000142612	0	0	0	0	2.08283e-05	7.76049e-05	0	2.74546e-05	0	0	0	2.20564e-05	0	1.91677e-05
7edc06b73cf86f33bcea61cce88e7f8e	Bacteria	Chloroflexi	Anaerolineae	Anaerolineales	Anaerolineaceae	uncultured	#N/A	B7821_uncultured	Copiotroph	0	0	0	0	0	0	0	0	0	0	0	0	0.000218678	0	0	0	0	0	0	0	0	0	0	0	0	0	0	0
7ee59eac08f1d0deec27140dd1c1f4c8	Bacteria	Omnitrophicaeota	uncultured bacterium	uncultured bacterium	uncultured bacterium	uncultured bacterium	uncultured bacterium	B3907_uncultured bacterium	Copiotroph	0	0	9.06495e-05	0.000151016	0	0	7.66171e-05	0	0	0	0	0	0.000103703	0	0.000109911	7.09769e-05	0	4.32638e-05	0	0	0	0	3.48696e-05	0	0	0	0	0
802848c7c94e01a10b663b6d7496eeef	Bacteria	Chloroflexi	Anaerolineae	Anaerolineales	Anaerolineaceae	Leptolinea	metagenome	B5218_Leptolinea	Copiotroph	0	0	0	0	0	0	6.12937e-05	0	0	0	0	0	0.000126247	0	0.000307187	0	0	0	0	0	0	0	0	0	0	0	0	0
8099191b76b25595912344dbbdb336fd	Bacteria	Chloroflexi	Ktedonobacteria	Ktedonobacterales	JG30-KF-AS9	#N/A	#N/A	B3122_f_JG30-KF-AS9	Copiotroph	0	0	0	0	0	0	0	0	0	0	0	0	0.000340416	0.000210261	0.000287459	0	0	0	0	5.24357e-05	0	0	0	0	0	0	9.00933e-05	0
80c522c33efc3c8091183f6245636e4a	Bacteria	Proteobacteria	Deltaproteobacteria	Syntrophobacterales	Syntrophobacteraceae	uncultured	sulfate-reducing bacterium EZ-2C2	B1039_uncultured	Copiotroph	0	0	0	0	0	0	0	0	0	0	0	0	0.0011768	0.00129996	0.000744012	0.000312682	0	0	0.000136541	0.000633424	0	0	5.23044e-05	0	1.52645e-05	0	0	0
8142ddaaf3f3f934de566d3c6ac0f346	Bacteria	Firestonebacteria	uncultured bacterium	uncultured bacterium	uncultured bacterium	uncultured bacterium	uncultured bacterium	B15815_uncultured bacterium	Copiotroph	0	0	0	0	0	0	0	0	3.74037e-05	0	0	0	0	0	0	0	0	0	4.62852e-06	0	0	0	0	0	0	0	0	0
815c8d4651b6862701fe679cc431349b	Bacteria	Bacteroidetes	Ignavibacteria	Kryptoniales	BSV26	uncultured bacterium	uncultured bacterium	B2818_uncultured bacterium	Copiotroph	0	0	0	0.000109486	0	0	0	0	0	0.000205608	0	0	0	0	0.000183185	0.000115098	0	0	8.0999e-05	0.000117456	0	0	0.000254984	0	0	0	0	0
818cbed403cc19d83e4756f5d4452c1c	Bacteria	Acidobacteria	Subgroup 6	#N/A	#N/A	#N/A	#N/A	B3253_o_NA	Copiotroph	0	0	0	0	0	0	0	0	0	0	0	0	3.8325e-05	0.00041138	0	0	0	0	0	0	0	0	0.000353055	0	0	0	0	0
81e445e666cd1d08f1cd159695d4bc5e	Bacteria	Planctomycetes	Phycisphaerae	mle1-8	uncultured bacterium mle1-8	uncultured bacterium mle1-8	uncultured bacterium mle1-8	B9610_uncultured bacterium mle1-8	Copiotroph	0	0	0	0	0	0	0	0	0	0	0	0	6.76323e-05	0	5.63645e-05	0	0	0	0	0	0	0	3.26903e-05	0	0	0	0	0
82a2e75f505c52c26183dbe431465e40	Bacteria	Elusimicrobia	Endomicrobia	Endomicrobiales	Endomicrobiaceae	Candidatus Endomicrobium	#N/A	B16612_Candidatus Endomicrobium	Copiotroph	0	0	0	0	0	0	0	0	0	0	0	0	3.38162e-05	0	0	0	0	0	0	0	0	0	0	0	0	0	0	0
8315d67f94151e6b25dab10ef4fccee4	Bacteria	Chloroflexi	Anaerolineae	Anaerolineales	Anaerolineaceae	uncultured	#N/A	B2028_uncultured	Copiotroph	0	0	0	0	0	0	0	0	0.000121562	6.90978e-05	0.000168702	0.000370628	0.000126247	0	8.7365e-05	0	1.65524e-05	0	0.000289282	6.50203e-05	0.000183369	0.00023794	0	0	0	0	0	0
8356ad021fa83e0aeb8897141fdcc90d	Bacteria	Bacteroidetes	Ignavibacteria	OPB56	uncultured bacterium KF-JG30-B11	uncultured bacterium KF-JG30-B11	uncultured bacterium KF-JG30-B11	B2631_uncultured bacterium KF-JG30-B11	Copiotroph	0	0	0	0	0	2.55731e-05	5.03484e-05	0	0.000128575	7.41537e-05	0.000130684	8.55294e-05	0	0	3.10005e-05	0	0	0	0.000152741	1.25846e-05	0	0	0.000276778	5.22052e-05	0.000176632	0	0	0
8368f5ebca6fde6214579b50232bd613	Bacteria	Planctomycetes	Phycisphaerae	Tepidisphaerales	WD2101 soil group	#N/A	#N/A	B4420_f_WD2101 soil group	Copiotroph	0	0	0	0	0	0	0	0	0	0	0	0	0.000182607	0.000124328	0.000290277	0	0	0	0	0	0	0	0	0	0	0	0	0
861ca2d37fec79db77a09c5813ff058c	Bacteria	Chloroflexi	Chloroflexia	Thermomicrobiales	JG30-KF-CM45	bacterium Ellin6537	bacterium Ellin6537	B11068_bacterium Ellin6537	Copiotroph	0	0	0	0	0	0	0	0	9.35093e-06	0	0	0	5.86147e-05	0	0	3.45293e-05	0	0	0	0	0	0	0	0	0	0	0	0
86976041e9602b644229bcf673d8377e	Bacteria	Chloroflexi	SHA-26	uncultured Dehalogenimonas sp.	uncultured Dehalogenimonas sp.	uncultured Dehalogenimonas sp.	uncultured Dehalogenimonas sp.	B10278_uncultured Dehalogenimonas sp.	Copiotroph	0	0	0	0	0	0	0	0	0	0	3.56412e-05	0	0	0	0.000118366	0	0	0	0	0	0	0	0	0	0	0	0	0
8716f67370cad0cdd9a7cc02263c51b0	Bacteria	Actinobacteria	Thermoleophilia	Gaiellales	uncultured	uncultured Rubrobacteraceae bacterium	uncultured Rubrobacteraceae bacterium	B2430_uncultured Rubrobacteraceae bacterium	Copiotroph	2.33434e-05	0	6.79871e-05	0.000232187	0	0	0	0	0.000189356	0	0.000142565	6.70819e-05	0.000234459	0	5.07281e-05	2.68561e-05	6.41406e-05	0.000120683	3.47139e-05	4.4046e-05	0	0	0	2.44712e-05	4.14322e-05	0	4.39479e-06	0
8771345a86a2f6905ede3adff07eef24	Bacteria	Chloroflexi	Anaerolineae	RBG-13-54-9	#N/A	#N/A	#N/A	B3878_o_RBG-13-54-9	Copiotroph	0	0	0	0	9.55098e-06	0	5.25374e-05	0	0.000158966	5.56153e-05	0.000114052	6.70819e-05	2.02897e-05	0	0	0	0	0	0.000138855	0	0	0	0	4.07853e-05	0	0	0	0
87b85aa92eacf2f5c4300be4c56b1b8d	Bacteria	Planctomycetes	Phycisphaerae	MSBL9	SG8-4	uncultured planctomycete	uncultured planctomycete	B7506_uncultured planctomycete	Copiotroph	0	0	0	0	0	0	0	0	0	0	0	0	6.76323e-05	0	5.91828e-05	0	0	0	8.33133e-05	0	0	0	0	0	0	0	0	3.62057e-05
883513fe46ccae9276108e654fa97e2e	Bacteria	Latescibacteria	uncultured proteobacterium	uncultured proteobacterium	uncultured proteobacterium	uncultured proteobacterium	uncultured proteobacterium	B4509_uncultured proteobacterium	Copiotroph	0	0	0	0	0	0	0	0	6.77942e-05	0	0.000104548	0	0.000112721	0	0	7.48135e-05	0	0	2.54568e-05	0	0	4.80456e-05	0	0	0	2.8843e-05	7.47115e-05	0
89900416f8576db12c2dc8ffbdde91be	Bacteria	Kiritimatiellaeota	Kiritimatiellae	WCHB1-41	uncultured Verrucomicrobia bacterium	uncultured Verrucomicrobia bacterium	uncultured Verrucomicrobia bacterium	B12512_uncultured Verrucomicrobia bacterium	Copiotroph	0	0	0	0	0	0	0	0	0	0	3.80173e-05	0	0	0	0	0	0	0	0	0	0	0	4.3587e-05	0	0	0	0	0
89c8ea6ccbe4dc515b33e8685f49c241	Bacteria	Chloroflexi	Anaerolineae	Anaerolineales	Anaerolineaceae	uncultured	#N/A	B8380_uncultured	Copiotroph	0	0	0	0	0	0	0	0	0	0	6.89064e-05	0	0	0	9.01833e-05	0	0	0	3.47139e-05	0	0	0	0	0	0	0	0	1.91677e-05
89fb9fc9430fb8b96b86adc82edaab89	Bacteria	Firmicutes	Clostridia	Clostridiales	Heliobacteriaceae	Hydrogenispora	uncultured Firmicutes bacterium	B1820_Hydrogenispora	Copiotroph	0	0	0	0	0.000131326	0	0	0	0	0.000274706	0.000180582	7.71442e-05	4.9597e-05	4.93657e-05	0.000225458	0	7.8624e-05	0	0.000354081	0	0.00012734	6.17729e-05	0	0	0.000157006	0	0	0.000264089
8a65e697836a928d7d6485ec66117f4d	Bacteria	Verrucomicrobia	Verrucomicrobiae	Pedosphaerales	Pedosphaeraceae	uncultured Prosthecobacter sp.	uncultured Prosthecobacter sp.	B3768_uncultured Prosthecobacter sp.	Copiotroph	0	0	0	0	0	0	0	0	0	0	0.000389677	0	0.000365214	0	0	0	0	0	0	0	0	0	0	0	0	0	0	0
8a8bceb77e236d14c66b36a01a2c1db4	Bacteria	Proteobacteria	Deltaproteobacteria	Myxococcales	VHS-B3-70	#N/A	#N/A	B20310_f_VHS-B3-70	Copiotroph	0	0	0	0	0	0	0	0	4.67546e-06	0	7.12824e-06	0	0	0	0	0	0	0	0	0	0	0	0	0	0	0	0	0
8b9178108b84596aac8c952205e7c647	Bacteria	Chloroflexi	Anaerolineae	RBG-13-54-9	uncultured Caldilineaceae bacterium	uncultured Caldilineaceae bacterium	uncultured Caldilineaceae bacterium	B868_uncultured Caldilineaceae bacterium	Copiotroph	0.000179744	0	0.000110794	0	0	0	0.000713634	0.000212954	0.00010286	0.000101119	0	6.70819e-05	0.000861185	0.000484515	0.000233913	0.00024746	0.000175869	0.000148008	0.000307796	0.000161502	0.000196103	0.000187607	0.000374849	0.000185981	0.000412141	0	0	9.58387e-05
8c6356a6558a5f1506a4a1944a79d1d2	Bacteria	Chloroflexi	Dehalococcoidia	vadinBA26	#N/A	#N/A	#N/A	B7680_o_vadinBA26	Copiotroph	0	0	0	0	0	0	0	0	0	0	0.000114052	0	0	0	0.000146548	0	0	0	0	0	0	0	0	0	0	0	0	0
8c68aa977f835f4006b5444c154467c1	Bacteria	Planctomycetes	Phycisphaerae	Phycisphaerales	AKAU3564 sediment group	#N/A	#N/A	B4622_f_AKAU3564 sediment group	Copiotroph	2.80121e-05	0	5.28789e-05	0	0	0	8.75624e-06	0	2.33773e-05	0	0	0	5.63603e-05	6.39925e-05	0.000233913	2.30196e-05	0	5.0095e-05	0	0	0	0	2.17935e-05	0	0	0	0	0
8cd2f9e41aaecd0d8987c1b2ac64f385	Bacteria	Proteobacteria	Deltaproteobacteria	Syntrophobacterales	Syntrophaceae	Desulfobacca	uncultured delta proteobacterium	B563_Desulfobacca	Copiotroph	0.000305798	0	0.000337418	0	0	0	0	0	0.00179304	0.00046009	0.00094568	0.000301869	0.00068985	0.000405895	0.00111884	0	0.000146903	0	0.00185835	0.000432071	0	0	0	0	0.000776308	0.00057177	0	0
8d791aa42e0ce4bc04a137520f07274f	Bacteria	Patescibacteria	Parcubacteria	uncultured bacterium	uncultured bacterium	uncultured bacterium	uncultured bacterium	B15586_uncultured bacterium	Copiotroph	0	0	0	0	0	0	0	0	0	0	0	0	3.8325e-05	0	0	0	0	0	0	0	0	4.57577e-06	0	0	0	0	0	0
8dbc42415032846928b357664280e378	Bacteria	Chloroflexi	Chloroflexia	Chloroflexales	Chloroflexaceae	Oscillochloris	Oscillochloris trichoides	B14874_Oscillochloris	Copiotroph	0	0	0	0	0	0	0	0	7.0132e-06	0	4.51455e-05	0	0	0	0	0	0	0	0	0	0	0	0	0	0	0	0	0
8dcbc80f6ac46c45d7b582e397b2d80f	Bacteria	Acidobacteria	Subgroup 25	#N/A	#N/A	#N/A	#N/A	B2029_o_NA	Copiotroph	0	0	0	0	0.000107449	0	0	0	0	0	0.000161574	0.00017609	5.41058e-05	0	4.22734e-05	0	0	0.000177609	0.000462852	0.000547429	0	0	0	0	0	0	3.07636e-05	0
8e018bcb9d053bb9169befff1da211c3	Bacteria	Chloroflexi	Anaerolineae	RBG-13-54-9	uncultured bacterium	uncultured bacterium	uncultured bacterium	B13060_uncultured bacterium	Copiotroph	0	0	0	0	0	0	0	0	2.10396e-05	0	5.46499e-05	0	0	0	0	0	0	0	0	0	0	0	0	0	0	0	0	0
8e74d4f2f8a2e3ec7a74a10b65587a73	Bacteria	Bacteroidetes	Bacteroidia	Chitinophagales	uncultured	#N/A	#N/A	B11268_f_uncultured	Copiotroph	0	0	0	0	0	0	0	0	4.20792e-05	0	0	0	0	0	0	0	0	0	3.23996e-05	0	0	0	3.05109e-05	0	0	0	0	0
8f2bc90134270b895037c9dc1290790d	Bacteria	Zixibacteria	#N/A	#N/A	#N/A	#N/A	#N/A	B5367_o_NA	Copiotroph	0	0	0	0	0	0	0	0	0	0	7.36585e-05	0	0	0.000199291	0	0	0	0	0	0	0.000114606	0	0	0	0	0	0	0
8f3d0c2ff8760e7853e452029ff3abe3	Bacteria	Zixibacteria	uncultured bacterium	uncultured bacterium	uncultured bacterium	uncultured bacterium	uncultured bacterium	B8506_uncultured bacterium	Copiotroph	0	0	0	0	0	0	0	0	4.90924e-05	0	0.000147317	0	0	0	0	0	0	0	0	0	0	0	0	0	0	0	0	0
8f43c1669eb98d4be99622456a8a14cb	Bacteria	Chloroflexi	Anaerolineae	SBR1031	A4b	wastewater metagenome	wastewater metagenome	B2895_wastewater metagenome	Copiotroph	0	5.43369e-05	0	0	0	0	0	0	0.000177668	0	0	5.53426e-05	0.000126247	4.38806e-05	0	0	0	0	0	0.000314614	0	0	0.000193962	0	0	6.44726e-05	0	0
8f78decb50fe363ba19bf874a2e164b2	Bacteria	Rokubacteria	NC10	Methylomirabilales	Methylomirabilaceae	Z114MB74	uncultured bacterium	B11070_Z114MB74	Copiotroph	0	0	0	0	0	0	0	0	0	0	6.17781e-05	0	0	0	1.97276e-05	0	0	1.36623e-05	0	1.88769e-05	0	0	0	0	0	0	0	0
8fe1d48a50031d9564023b2bc622dd42	Bacteria	Fibrobacteres	Fibrobacteria	Fibrobacterales	Candidatus Raymondbacteria	uncultured bacterium	uncultured bacterium	B18591_uncultured bacterium	Copiotroph	0	0	0	0	0	0	0	0	0	0	1.42565e-05	0	0	0	0	0	0	0	0	0	0	0	6.53806e-06	0	0	0	0	0
91c2e87693fa4be494d789963a8e380d	Bacteria	Bacteroidetes	Bacteroidia	Bacteroidales	Paludibacteraceae	uncultured	uncultured soil bacterium	B11722_uncultured	Copiotroph	0	0	0	0	0	0	0	0	3.97414e-05	0	0	0	5.63603e-05	0	0	0	0	0	0	0	0	0	0	0	0	0	0	0
92cd18d82152bff631a515264e71d7ef	Bacteria	Bacteroidetes	Ignavibacteria	Kryptoniales	BSV26	uncultured bacterium	uncultured bacterium	B7681_uncultured bacterium	Copiotroph	0	0	0	0	0	0	0	0	0.00017533	0	0	0	0	3.10821e-05	0	0	1.24143e-05	0	0	0	0	0	4.3587e-06	0	0	0	0	0
932e22115db825699eb0171421e179c7	Bacteria	Proteobacteria	Gammaproteobacteria	Competibacterales	Competibacteraceae	Candidatus Competibacter	#N/A	B2530_Candidatus Competibacter	Copiotroph	0	0	0	0	0	0	0	0	0.000327283	5.22447e-05	0	0.000268328	0	2.37686e-05	0	0	0	0	0.000458223	0	0	1.60152e-05	0	4.56795e-05	4.14322e-05	0	0	0
94fe9c476ca81bebc7a42d6622cc5815	Bacteria	Latescibacteria	Latescibacteria	Latescibacterales	Latescibacteraceae	metagenome	metagenome	B1248_metagenome	Copiotroph	0.000242771	3.49308e-05	0.000251804	0.000205759	0	0	4.59703e-05	3.19431e-05	0.000374037	3.70769e-05	0.000427695	0.000350503	0.000365214	0	5.07281e-05	0	0	0.00010019	0.000150427	0.000388025	0	8.0076e-05	3.92283e-05	0	0.00023987	0	0	0
95011699aba582c341a2a2ab480e3351	Bacteria	Actinobacteria	Thermoleophilia	Solirubrobacterales	Solirubrobacteraceae	Conexibacter	uncultured actinobacterium	B4676_Conexibacter	Copiotroph	0	0	0	0	0	0	0	0	4.20792e-05	0	0	0	0	0	0.000507281	0	0	0	0	0	0	0	6.97393e-05	0	0	0	0	0
95404a4b0ac4d83ddb25a4c26bfe3970	Bacteria	Latescibacteria	#N/A	#N/A	#N/A	#N/A	#N/A	B15338_o_NA	Copiotroph	0	0	0	0	0	0	0	0	3.97414e-05	0	0	0	0	0	8.45468e-06	0	0	0	0	0	0	0	0	0	0	0	0	0
96098068b6f6f6674a64d38887e8fe48	Bacteria	Acidobacteria	Thermoanaerobaculia	Thermoanaerobaculales	Thermoanaerobaculaceae	TPD-58	uncultured bacterium	B4741_TPD-58	Copiotroph	4.20181e-05	0	1.25902e-05	8.87218e-05	0	0	5.03484e-05	2.7684e-05	2.10396e-05	0	0	0	6.76323e-05	0	3.94552e-05	6.52221e-05	0	0	2.31426e-05	0	0	1.83031e-05	3.05109e-05	0	0	0	0	0
97c67c53c89fdaf618742b207791bad0	Bacteria	Planctomycetes	Planctomycetacia	Isosphaerales	Isosphaeraceae	#N/A	#N/A	B712_f_Isosphaeraceae	Copiotroph	0	0	0.000100722	0	0	8.76791e-05	0	0	7.71452e-05	0	0.000368293	0	0.000795807	0.00147914	0.000744012	0.000205258	0	0.000389374	0.000654935	0.00088931	0.000491532	0.00074585	0	0	0.000433947	0	0	0
97e7084cd69a46a914477625a36841da	Bacteria	Planctomycetes	Phycisphaerae	MSBL9	SM23-30	#N/A	#N/A	B15829_f_SM23-30	Copiotroph	0	0	0	0	0	0	0	0	1.87019e-05	0	4.75216e-06	0	0	0	2.25458e-05	0	0	0	0	0	0	0	0	0	0	0	0	0
9891c15f1939856753315485f626db1d	Bacteria	Verrucomicrobia	Verrucomicrobiae	Pedosphaerales	Pedosphaeraceae	ADurb.Bin063-1	uncultured Verrucomicrobia subdivision 3 bacterium	B1720_ADurb.Bin063-1	Copiotroph	0.00111581	0	0	0	0	0	0	0	0.00015429	0.000192126	0	0.000169382	0	0	0	0	0	0	0.000118027	0	0	0.000155576	0.000211397	0	0	0	0	5.1114e-05
98f15d097d6a7fd3af8ca2d8f6fefa95	Bacteria	Chloroflexi	Ktedonobacteria	Ktedonobacterales	uncultured bacterium	uncultured bacterium	uncultured bacterium	B1023_uncultured bacterium	Copiotroph	0	0	0	0	9.55098e-06	0	0	0	0	0	0	0	0.000985177	0.000731343	0.000656647	0.00019183	0	0	0.00057625	0.000874628	6.62167e-05	0.000302001	1.74348e-05	0	0.000115574	4.75061e-05	0	0
99b91abab4cc9bd662dcc8acb0c9981f	Bacteria	Planctomycetes	Phycisphaerae	mle1-8	#N/A	#N/A	#N/A	B8382_o_mle1-8	Copiotroph	0	0	0	0	0	0	0	0	0	0	4.03934e-05	0.000114039	0	0	0	0	0	0	0	0	0	0	0	0	0	0	0	0
99cddf4f41e12ad297cf9a3093132bd6	Bacteria	Proteobacteria	Deltaproteobacteria	Myxococcales	#N/A	#N/A	#N/A	B3948_o_Myxococcales	Copiotroph	0	0	0	0	0	0	0	0	0	0	0	0	0.000211915	0	0.00022264	0	0	0	0.000300853	0	0	0	0	0	0	0	0	0
9a96becf0589fc453b3f71ee400d1af0	Bacteria	Patescibacteria	Parcubacteria	Candidatus Jorgensenbacteria	Candidatus Adlerbacteria bacterium GW2011_GWC1_50_9	Candidatus Adlerbacteria bacterium GW2011_GWC1_50_9	Candidatus Adlerbacteria bacterium GW2011_GWC1_50_9	B20340_Candidatus Adlerbacteria bacterium GW2011_GWC1_50_9	Copiotroph	0	0	0	0	0	0	0	0	0	0	0	5.03114e-06	0	0	0	0	0	0	0	0	0	0	4.3587e-06	0	0	0	0	0
9ac34822577c55fb785077331429a67b	Bacteria	Chloroflexi	TK10	uncultured bacterium	uncultured bacterium	uncultured bacterium	uncultured bacterium	B2030_uncultured bacterium	Copiotroph	6.30271e-05	2.13466e-05	0.000113312	0.000111374	0	9.13324e-06	6.78609e-05	0	0	0	0	2.34787e-05	0.000347179	0.00023403	0.000183185	4.79574e-05	0	0.000207211	0.000104142	0.000216035	0	0	0	0	0	0	1.53818e-05	0
9ad65ca74de17d9e7e879748c0155acc	Bacteria	Chloroflexi	Dehalococcoidia	t0.6.f	#N/A	#N/A	#N/A	B11396_o_t0.6.f	Copiotroph	0	0	0	0	0	0	0	0	0.000105198	0	0	0	0	0	0	0	0	0	0	0	0	0	0	0	0	0	0	0
9bfe75e6f71d1b05d93e8d1bc61af2ea	Bacteria	#N/A	#N/A	#N/A	#N/A	#N/A	#N/A	B3217_o_NA	Copiotroph	0	5.82181e-05	3.27345e-05	0	0	0	9.19405e-05	0	0.000112211	3.70769e-05	9.26672e-05	2.68328e-05	3.38162e-05	0	0.000152184	5.94672e-05	0	1.36623e-05	0	3.56563e-05	0	0	2.83316e-05	4.40481e-05	6.10579e-05	0	0	2.5557e-05
9bfffd34d3fc58a3176353c9ddc231d5	Bacteria	Acidobacteria	Aminicenantia	Aminicenantales	#N/A	#N/A	#N/A	B2847_o_Aminicenantales	Copiotroph	0	0	2.26624e-05	4.71924e-05	0	0	0	0	0	0	0	0	1.57809e-05	3.47388e-05	0	0	2.27596e-05	0	0	0	4.58424e-05	9.15154e-06	0.000618936	7.50449e-05	2.18064e-05	1.69665e-05	0	0.000132044
9c4a8d637d52ba13507cc2b80f1167a3	Bacteria	Acidobacteria	Subgroup 22	uncultured prokaryote	uncultured prokaryote	uncultured prokaryote	uncultured prokaryote	B7174_uncultured prokaryote	Copiotroph	0	0	0	0	0	0	0	0	0	0	0	0	7.21411e-05	0	0.000228276	0	0	0	0	0	0	0	0	0	0	0	0	0
9c7457e863d0eff356f2cb8d03d17173	Bacteria	Cyanobacteria	Sericytochromatia	uncultured bacterium	uncultured bacterium	uncultured bacterium	uncultured bacterium	B3680_uncultured bacterium	Copiotroph	0	0.000112555	6.54691e-05	3.96416e-05	0	0	0	0	1.16887e-05	0.000109545	0	4.52803e-05	0	0	2.25458e-05	0	0	2.27704e-05	0.000148112	0.000115359	0	0	0	0	0	0	0	0
9c7e1ef431b89e51458abbdf8e6c4143	Bacteria	Planctomycetes	Planctomycetacia	Isosphaerales	Isosphaeraceae	Aquisphaera	#N/A	B795_Aquisphaera	Copiotroph	0	0	7.30232e-05	0	0.00031757	9.3159e-05	0	0	0.000490924	0.00016179	0.000496601	0.000157642	0.00149242	0.000546679	0.000563645	0.000531368	0	0.000218596	0.000101827	0.000524357	0.000201197	0.000121258	5.01251e-05	0.000210452	0	0	0	3.19462e-05
9cb5c8773e719046605cd9668cfacd93	Bacteria	Firmicutes	Clostridia	DTU014	uncultured Bacilli bacterium	uncultured Bacilli bacterium	uncultured Bacilli bacterium	B17198_uncultured Bacilli bacterium	Copiotroph	0	0	0	0	0	0	0	0	9.35093e-06	0	2.13847e-05	0	0	0	0	0	0	0	0	0	0	0	0	0	0	0	0	0
9ce89af23ef73be35376813dfdc05aa7	Bacteria	Zixibacteria	uncultured prokaryote	uncultured prokaryote	uncultured prokaryote	uncultured prokaryote	uncultured prokaryote	B1612_uncultured prokaryote	Copiotroph	9.33735e-05	0	0.000100722	0	0	0	0	0	0.0001239	0	0.000299386	8.72065e-05	0	0	0	0	0.000144834	0	9.48846e-05	0.000434168	4.58424e-05	0	0.00060368	7.99392e-05	0.000154825	0.000110282	0	0
9d5cff52e39fcd6811e82fd6ab3bbe7d	Bacteria	Chloroflexi	JG30-KF-CM66	uncultured bacterium	uncultured bacterium	uncultured bacterium	uncultured bacterium	B9617_uncultured bacterium	Copiotroph	0	0	0	0	0	0	0	0	0	0	0	0	0	0	9.30015e-05	0	0	0	0	0	0	0	6.97393e-05	0	0	0	0	0
9dad315c2604cbbfc7039e1077dc10e3	Bacteria	Planctomycetes	Phycisphaerae	MSBL9	SG8-4	uncultured planctomycete	uncultured planctomycete	B1464_uncultured planctomycete	Copiotroph	0	0	0	0	0.00016953	0	0	0	0	0.000175272	0.000482345	0.00054504	0	0	0.000321278	0.000239787	0.000182077	0	0.000196712	0.000331394	0	0	0	0	0	0	0	0
9dfbbeb7c317630369a99bada7ec9576	Bacteria	Elusimicrobia	Endomicrobia	Endomicrobiales	Endomicrobiaceae	Candidatus Endomicrobium	metagenome	B9774_Candidatus Endomicrobium	Copiotroph	0	0	0	0	0	0	0	0	0	0	0	0	0	0	0	0	0	0	0	0	0	0	0.000137299	0	0	0	0	0
9e701ebeb4f9517a1724ab260b81dfb5	Bacteria	Proteobacteria	Deltaproteobacteria	Myxococcales	bacteriap25	uncultured Geobacter sp.	uncultured Geobacter sp.	B12919_uncultured Geobacter sp.	Copiotroph	0	0	0	0	0	0	0	0	0	0	0	0	4.28338e-05	0	3.94552e-05	0	0	0	0	0	0	0	0	0	0	0	0	0
9fd06d553b91e14c4907c74b1b9492a4	Bacteria	Proteobacteria	Deltaproteobacteria	Myxococcales	Haliangiaceae	Haliangium	#N/A	B8892_Haliangium	Copiotroph	0	0	0	0	0	0	0	0	0	0	0	0	0.000171335	0	0	0	0	0	0	0	0	0	0	0	0	0	0	0
a02c2dbc292c0f091c90c4972b0625f9	Bacteria	Bacteroidetes	Bacteroidia	Sphingobacteriales	Lentimicrobiaceae	#N/A	#N/A	B486_f_Lentimicrobiaceae	Copiotroph	0.000203087	0	0.000156119	0.000396416	0.000353386	7.48925e-05	0.000286767	0.000313042	0.000820544	0.000950516	0.00125457	0.00176258	0.000707885	0.00158153	0.000510099	0.000909272	0	0	0	0	0	0.00032488	9.15328e-05	0	0	0	0	0
a032825234a3bfb27422287bd3b6ce31	Bacteria	Proteobacteria	Deltaproteobacteria	Sva0485	uncultured Syntrophus sp.	uncultured Syntrophus sp.	uncultured Syntrophus sp.	B3806_uncultured Syntrophus sp.	Copiotroph	0	0	0	0	0	0	0	0	0.000479235	0	0	0	0.000259257	0	0	0	0	0	0	0	0	0	0	0	0	0	0	0
a08f591220b9459d6b3caa93cde13d9c	Bacteria	Planctomycetes	Phycisphaerae	MSBL9	SG8-4	uncultured deep-sea bacterium	uncultured deep-sea bacterium	B968_uncultured deep-sea bacterium	Copiotroph	0	0	0	0	0.000119387	8.40258e-05	6.12937e-05	5.1109e-05	0.000392739	0.000155049	0.000268497	0.000291806	0.000376487	0.000524739	0.000636919	0.000826786	6.00025e-05	3.87097e-05	9.25703e-05	0	0.000440596	0.000377501	1.74348e-05	0	0	0	1.0987e-05	0
a0e21b768be2ae7584e0270584521175	Bacteria	Chloroflexi	SHA-26	uncultured bacterium	uncultured bacterium	uncultured bacterium	uncultured bacterium	B5368_uncultured bacterium	Copiotroph	0	0	0	0	0	0	0	0	0	0	7.12824e-05	0	0.000121738	0	0	0.000136199	0	0	6.94277e-05	0	0	0	0	0	0	0	0	0
a110fa843907cb37088af55b1048060b	Bacteria	Proteobacteria	Gammaproteobacteria	Competibacterales	Competibacteraceae	Candidatus Competibacter	anaerobic digester metagenome	B2160_Candidatus Competibacter	Copiotroph	0	0	0	0	0	0	0	0	0	0.000385936	0.00064867	0.000405846	0	0	0	0	0	0	1.85141e-05	0	0	9.15154e-06	0	0	0	0	0	0
a140417e3b194932658d62354e27ea7b	Bacteria	Chloroflexi	Anaerolineae	Anaerolineales	Anaerolineaceae	uncultured	uncultured Chloroflexi bacterium	B1256_uncultured	Copiotroph	0	9.89707e-05	0.000375188	0	0	0	0	0	0.00112912	0.000517391	0.00028513	0.000149257	0.000191625	0	0	0	0	7.74195e-05	9.0256e-05	5.45332e-05	8.65911e-05	0.000320304	0	0	0	0	0	0
a1dd56f8156838f747dd15c1a3857c8d	Bacteria	Firmicutes	Clostridia	Clostridiales	Ruminococcaceae	#N/A	#N/A	B5290_f_Ruminococcaceae	Copiotroph	0	0	0	0	0	0	0	0	0	0	0.000349284	0	0	0	0	0	0	0	0	0	0	0	9.15328e-05	0	0	0	0	0
a1f28e617e6ba72d283826d510b81221	Bacteria	Hydrogenedentes	Hydrogenedentia	Hydrogenedentiales	Hydrogenedensaceae	#N/A	#N/A	B10112_f_Hydrogenedensaceae	Copiotroph	0	0	0	0	0	0	0	0	0	0	0	0	9.69396e-05	0	4.50916e-05	0	0	0	0	0	0	0	0	0	0	0	0	0
a276e716b42cc95de11dcca1d6f03aa7	Bacteria	Spirochaetes	V2072-189E03	uncultured Spirochaetales bacterium	uncultured Spirochaetales bacterium	uncultured Spirochaetales bacterium	uncultured Spirochaetales bacterium	B14296_uncultured Spirochaetales bacterium	Copiotroph	0	0	0	0	0	0	0	0	4.67546e-06	0	0	0	1.35265e-05	0	0	3.2611e-05	0	0	0	0	0	0	0	0	0	0	0	0
a2e609550867eb1dee6e2f0be3b2614a	Bacteria	Chloroflexi	Anaerolineae	RBG-13-54-9	uncultured Anaerolineaceae bacterium	uncultured Anaerolineaceae bacterium	uncultured Anaerolineaceae bacterium	B923_uncultured Anaerolineaceae bacterium	Copiotroph	0.000130723	0	0	0.000215197	0	9.68123e-05	0	0	0.000549367	0.000869621	0.000327899	0.00023311	0	0.000387612	0.000465007	0.00068675	0	0.000191272	0.000134227	0.000222328	0	0	0.000309468	0	0	0	0	3.62057e-05
a3026116ac52bd35cfa005b95d93d4a1	Bacteria	Firmicutes	#N/A	#N/A	#N/A	#N/A	#N/A	B10547_o_NA	Copiotroph	0	0	0	0	0	0	0	0	0	6.74125e-06	3.80173e-05	1.00623e-05	0	0	0	0	0	2.50475e-05	3.47139e-05	4.19486e-06	0	0	0	0	0	0	0	0
a313a960f9e324adb9fb4d76f7634bce	Bacteria	Chloroflexi	Anaerolineae	uncultured	uncultured Chloroflexi bacterium	uncultured Chloroflexi bacterium	uncultured Chloroflexi bacterium	B4560_uncultured Chloroflexi bacterium	Copiotroph	0	0	0	0	3.34284e-05	0	0	0	9.11716e-05	2.19091e-05	7.36585e-05	5.36655e-05	0	0	0	0	0	0	0	0	0.000247039	0	0	0	0	0	3.07636e-05	0
a34bd5fef7c08a5efda5c76f0c27f773	Bacteria	Firmicutes	Clostridia	#N/A	#N/A	#N/A	#N/A	B11735_o_NA	Copiotroph	0	0	0	0	0	0	0	0	0	0	0	0	9.46852e-05	0	0	0	0	0	0	0	0	0	0	0	0	0	0	0
a3efce8afade05bd474d10209ac46d40	Bacteria	Chloroflexi	Dehalococcoidia	#N/A	#N/A	#N/A	#N/A	B9859_o_NA	Copiotroph	0	0	0	0	0	0	0	0	0	0	0	0	5.63603e-05	0	0	0	0	0	0	0	0	0	8.0636e-05	0	0	0	0	0
a421cbf27bf3b68b9654ee5eb9dd7a55	Bacteria	Proteobacteria	Deltaproteobacteria	Myxococcales	BIrii41	#N/A	#N/A	B707_f_BIrii41	Copiotroph	0.000280121	0.000421111	0	0.000211422	0	0	0.000733335	0.00018314	0.00047456	0.000835915	0.000142565	0.000669142	0.0001533	0.000301679	0.000112729	0.00110302	0.000140696	0.000266414	0	0	0	0.000304289	0	0.000373593	0	0	0	0
a45a09de5bff5c5a4a22598d48f663e9	Bacteria	Proteobacteria	Deltaproteobacteria	Myxococcales	Archangiaceae	Anaeromyxobacter	uncultured Anaeromyxobacter sp.	B3908_Anaeromyxobacter	Copiotroph	0	0	0	0	0	0	0	0	0.000308581	0	0.00041819	0	0	0	0	0	0	0	0	0	0	0	0	0	0	0	0	0
a4798e5d7e34f33c34b72fe752cfc64b	Bacteria	Chloroflexi	Ktedonobacteria	Ktedonobacterales	Ktedonobacteraceae	#N/A	#N/A	B3291_f_Ktedonobacteraceae	Copiotroph	0	0	0	0	0	0	0	0	0	0	0	0	0.000565857	0.000151754	7.60921e-05	0	0	0	0	7.76049e-05	0	0	0	0	0	0	0	0
a56c4f36a3137f940fc2560517ad5b76	Bacteria	Chloroflexi	Ktedonobacteria	Ktedonobacterales	Ktedonobacteraceae	uncultured	uncultured bacterium	B16927_uncultured	Copiotroph	0	0	0	0	0	0	0	0	0	0	0	0	1.12721e-05	0	2.5364e-05	0	0	0	0	0	0	0	0	0	0	0	0	0
a583020e5fa819e6b8d2f7df48ddf218	Bacteria	Spirochaetes	Spirochaetia	Spirochaetales	Spirochaetaceae	Spirochaeta 2	uncultured bacterium	B2584_Spirochaeta 2	Copiotroph	0.000109714	0	2.26624e-05	0	3.58162e-05	6.7586e-05	5.47265e-05	0	0.000165979	8.0895e-05	2.61369e-05	5.70196e-05	0.000103703	0	0.000284641	0	0	0	5.09137e-05	0	0.000160448	5.03335e-05	0	1.79455e-05	1.74451e-05	1.35732e-05	0	0
a59d673aa0c88e34136d4c550824ee44	Bacteria	Latescibacteria	Latescibacteria	Latescibacterales	Latescibacteraceae	metagenome	metagenome	B4240_metagenome	Copiotroph	0	0	0	0	0	0	0	0	7.48074e-05	0	5.46499e-05	0.000125779	0	0	0	0	0	0.000107021	0.000101827	0.000100677	0	0	0	0	0	0	0	0
a61f6032fbd06c910175c96138a10e06	Bacteria	Bacteroidetes	Ignavibacteria	SJA-28	#N/A	#N/A	#N/A	B6655_o_SJA-28	Copiotroph	0	0	0	0	0	0	0	0	0	0	0	0.000216339	0	0	0	0	0	0	0	0	0	0	0	0	0	0	0	0
a76cd2995c83062060f0d3fc5e3ea340	Bacteria	#N/A	#N/A	#N/A	#N/A	#N/A	#N/A	B2613_o_NA	Copiotroph	0	0	0	0	0	0	0	0	0	0	0	0	0	0.000504627	0.000236731	0	0	0	6.47992e-05	0.00031042	0	5.49092e-05	0	0	2.3987e-05	0	0	0
a7a29bb838467ae40ea0e59fa8419fcd	Bacteria	Planctomycetes	Phycisphaerae	mle1-8	uncultured bacterium	uncultured bacterium	uncultured bacterium	B6739_uncultured bacterium	Copiotroph	5.36898e-05	0	0	0	0	0	0	0	0	0	0	0	6.76323e-05	2.37686e-05	2.81823e-05	2.68561e-05	0	0	0	0	0	8.23638e-05	0	0	0	0	0	0
a8582f5630341a041b23dd4c5a9f6e91	Bacteria	WS2	uncultured bacterium	uncultured bacterium	uncultured bacterium	uncultured bacterium	uncultured bacterium	B10364_uncultured bacterium	Copiotroph	0	0	1.00722e-05	0	0	0	0	0	7.0132e-06	1.17972e-05	2.61369e-05	8.38524e-06	0	0	1.40911e-05	0	0	2.73245e-05	0	0	0	0	0	0	0	0	0	1.91677e-05
a8769f7c419b18ca00a9119e6e03840e	Bacteria	Armatimonadetes	DG-56	uncultured bacterium	uncultured bacterium	uncultured bacterium	uncultured bacterium	B3888_uncultured bacterium	Copiotroph	0	0	0	0	6.44691e-05	0	0	0	0.000109873	0	4.98977e-05	7.37901e-05	0	9.69029e-05	0.000101456	8.82416e-05	0	0	0	0	0	8.23638e-05	0	0	0	0	0	0
a8d1f251a0fb73b7513f94b9517be954	Bacteria	Latescibacteria	uncultured soil bacterium PBS-III-30	uncultured soil bacterium PBS-III-30	uncultured soil bacterium PBS-III-30	uncultured soil bacterium PBS-III-30	uncultured soil bacterium PBS-III-30	B6379_uncultured soil bacterium PBS-III-30	Copiotroph	0	0	0	0	0	0	0	0	6.0781e-05	0	0	0	7.43955e-05	0	0	0	9.51764e-05	0	0	0	0	0	0	0	0	0	0	7.24115e-05
a8f906f3038430dbb31240eca5479ef0	Bacteria	Verrucomicrobia	Verrucomicrobiae	#N/A	#N/A	#N/A	#N/A	B12369_o_NA	Copiotroph	0	0	0	0	0	0	0	0	0	0	1.42565e-05	0	0	0	0	0	0	0	0	0	3.56552e-05	1.14394e-05	1.08968e-05	0	0	0	0	1.49082e-05
aa1f2f12c57588f9d753f6674a61718e	Bacteria	Elusimicrobia	Elusimicrobia	MVP-88	uncultured bacterium	uncultured bacterium	uncultured bacterium	B9342_uncultured bacterium	Copiotroph	0	0	0	0	0	0	0	0	0	0	0	0	5.18514e-05	5.48507e-05	4.50916e-05	0	0	0	0	0	0	0	0	0	0	0	0	0
aa7b399765cd1a20044a43dae5cdd4db	Bacteria	Proteobacteria	Alphaproteobacteria	Rhodospirillales	Rhodopirillaceae	Defluviicoccus	uncultured Defluviicoccus sp.	B105_Defluviicoccus	Copiotroph	0.000219428	0	4.02887e-05	3.02032e-05	0.000100285	0	0	0	0.00682852	0.00601825	0.0124222	0.00745783	0.000795807	0.000372985	0.000645374	0.000454636	7.24168e-05	0	0.00349453	0.00290284	0.00414873	0.00244117	6.53806e-05	0	0.000320554	7.80457e-05	0	0
aa98446a40277f2a9c273cffa5e1450f	Bacteria	Chlamydiae	Chlamydiae	Chlamydiales	Parachlamydiaceae	#N/A	#N/A	B11162_f_Parachlamydiaceae	Copiotroph	0	0	0	0	0	0	0	0	1.87019e-05	0	0	0	5.86147e-05	0	0	0	0	0	0	0	0	0	0	0	0	0	0	2.76867e-05
aadcb674a6b7016a9273e78d4302f8e0	Bacteria	Chloroflexi	Anaerolineae	SBR1031	uncultured Gemmatimonadetes bacterium	uncultured Gemmatimonadetes bacterium	uncultured Gemmatimonadetes bacterium	B9287_uncultured Gemmatimonadetes bacterium	Copiotroph	0	0	0	0	0	0	0	0	0	0	0	0	5.18514e-05	0	5.07281e-05	0	0	0	0	0	0	6.63487e-05	0	0	0	0	0	0
AB179678.1.1413	Bacteria	Patescibacteria	ABY1	Candidatus Magasanikbacteria	uncultured bacterium	uncultured bacterium	uncultured bacterium	B7133_uncultured bacterium	Copiotroph	0	0	0	0	0	0	1.31344e-05	0	7.0132e-06	0	0	8.72065e-05	1.35265e-05	0	0	3.83659e-05	0	0	0	0	6.87635e-05	0	0	0	0	0	0	0
AB186865.1.1470	Bacteria	Firmicutes	Clostridia	Clostridiales	Clostridiaceae 1	Clostridium sensu stricto 12	uncultured bacterium SJA-65	B3046_Clostridium sensu stricto 12	Copiotroph	0	0	0	0	0	0	0	0	0	0	0	0.000231433	0.000135265	0	0.000214185	0	0	0	0	0	0	0.000260819	6.97393e-05	0	0	0	0	7.02817e-05
AB239706.1.1519	Bacteria	Acidobacteria	Blastocatellia (Subgroup 4)	Pyrinomonadales	Pyrinomonadaceae	RB41	#N/A	B910_RB41	Copiotroph	0	0	0	0	0	0	0	0	0.000385726	0.00043481	0.000646294	0.00072113	0	0	0	0	0	0	0.00155518	0.0010613	0	0	0	0	0.000235509	0	0	0
AB240260.1.1484	Bacteria	Gemmatimonadetes	Gemmatimonadetes	Gemmatimonadales	Gemmatimonadaceae	uncultured	#N/A	B469_uncultured	Copiotroph	0	0	0	0	0	0	0	0	0.000617161	0.000256167	0.0021955	0.00157139	0	0	0.000563645	0.000767318	0	0.000177609	0.00188843	0.000715224	0.000654527	0.000752714	0.000736621	0.000422536	0	0	0.000595494	0
AB240304.1.1455	Bacteria	Chloroflexi	Anaerolineae	Anaerolineales	Anaerolineaceae	Anaerolinea	uncultured bacterium	B16_Anaerolinea	Copiotroph	0.00144029	0.000877152	0.00299899	0.00399625	0.000728263	0	0.00288299	0.0038715	0.00312789	0.00916978	0.00146842	0.0053481	0.00928366	0.0125645	0.00706811	0.00864768	0.00248493	0.000740039	0.00192778	0.00469824	0.000837896	0.00345471	0.00193962	0.00358421	0.00355008	0.00345607	0.0048958	0.00139924
AB240371.1.1518	Bacteria	Proteobacteria	Deltaproteobacteria	#N/A	#N/A	#N/A	#N/A	B2667_o_NA	Copiotroph	0	8.92677e-05	0	0	0	0	0	0	9.35093e-05	0	0	7.0436e-05	0.000241222	0	0.000109911	0	0	0	6.47992e-05	0	0.000351458	0	0.000104609	0	0.000146103	0	0	0
AB240378.1.1464	Bacteria	Proteobacteria	Alphaproteobacteria	#N/A	#N/A	#N/A	#N/A	B16098_o_NA	Copiotroph	0	0	0	0	0	0	0	0	2.33773e-05	0	0	0	0	0	1.97276e-05	0	0	0	0	0	0	0	0	0	0	0	0	0
AB364743.1.1485	Bacteria	Proteobacteria	Deltaproteobacteria	Deltaproteobacteria Incertae Sedis	Syntrophorhabdaceae	Syntrophorhabdus	uncultured Syntrophorhabdaceae bacterium	B1140_Syntrophorhabdus	Copiotroph	0.00019375	0	0.000201443	0	0	0	0	0	0.00055638	0	0.000154445	0.000811691	0.00022995	0	0	0	0	0.000368881	0.000645678	0	0	0	0.00023537	0.000109305	0	0.000220564	0	0
AB364751.1.1484	Bacteria	Proteobacteria	Deltaproteobacteria	Syntrophobacterales	Syntrophaceae	Desulfobacca	uncultured delta proteobacterium	B682_Desulfobacca	Copiotroph	0	0.000190179	0	0	0	0	0	0	0	0.00178812	0	0.00187326	0	0.000833731	0	0	0	0	0	0.00116198	0	0.000148712	0.000124223	0	0	0.000310486	0	0
AB364761.1.1458	Bacteria	Acidobacteria	Subgroup 18	#N/A	#N/A	#N/A	#N/A	B232_o_NA	Copiotroph	0	0	0	0	0.000596937	0.000453009	0	0	0.00434117	0.00213192	0.00188661	0.00663608	0	0	0	0.00112988	0.00118971	0.000705883	0	0	0	0	0	0.00138344	0	0	0	0.0018039
AB364867.1.1454	Bacteria	Acidobacteria	Aminicenantia	Aminicenantales	metagenome	metagenome	metagenome	B443_metagenome	Copiotroph	0	0	0.000380224	0.00093441	0	0	0.000411543	0.000811355	0.000633525	0	0	0	0.00248211	0.00228362	0.00130202	0.00113179	0	0.000136623	0	6.50203e-05	0.000466064	0.000402668	0.000119864	0.00037033	0.000133019	0.000391925	2.41714e-05	0
AB365487.1.1423	Bacteria	Proteobacteria	Alphaproteobacteria	Micropepsales	Micropepsaceae	Rhizomicrobium	Rhizomicrobium electricum	B3784_Rhizomicrobium	Copiotroph	0.000196084	0	0	0	0	0	0	0	7.71452e-05	0.000101119	0	0	2.70529e-05	0	0	0	0	0	0	9.85792e-05	3.31084e-05	0	0.000163451	0	0	0	0	0
ab38aa0576a29b0ea923023663b09261	Bacteria	#N/A	#N/A	#N/A	#N/A	#N/A	#N/A	B4481_o_NA	Copiotroph	0	0	7.05052e-05	2.45401e-05	2.8653e-05	0	0	0	3.97414e-05	2.02237e-05	0.00016395	4.36032e-05	2.47985e-05	0	3.38187e-05	3.83659e-05	0	0	1.15713e-05	0	2.29212e-05	2.97425e-05	0	0	0	0	0	0
AB426208.1.1398	Bacteria	Acidobacteria	Aminicenantia	Aminicenantales	metagenome	metagenome	metagenome	B1146_metagenome	Copiotroph	0	0	0	0	0	0	0	0	0.000530665	0	0.000496601	0.00154791	0	0	0	0	0	0	0	0	0.0009143	0	0	0	0	0	0.00016041	0
AB426218.1.1414	Bacteria	Proteobacteria	Deltaproteobacteria	Syntrophobacterales	Syntrophaceae	Desulfobacca	#N/A	B903_Desulfobacca	Copiotroph	0	0	0	0	0	0	0	0	0.000416116	0.00182351	0.000805492	0	0	0	0	0	0	0	0.000562365	0.0012207	0	5.49092e-05	0	0	0	0	0	0
AB426232.1.1420	Bacteria	Acidobacteria	Subgroup 6	#N/A	#N/A	#N/A	#N/A	B198_o_NA	Copiotroph	0	0	0	0	0.000854813	0.00440039	0	0.000136291	0.0026206	0.000296615	0.0017488	0.00296167	0.00250916	0.000447948	0.000727103	0.00286018	0	0.000330171	0	0	0.00184388	0.00404956	0	0	0	0	0.00048123	0.00129063
AB486186.1.1358	Bacteria	Proteobacteria	Gammaproteobacteria	Betaproteobacteriales	Burkholderiaceae	#N/A	#N/A	B364_f_Burkholderiaceae	Copiotroph	0	0.00122258	0.000465838	0.00144786	0	0	0	0	0	0.0015724	0.000565507	0.00255247	0	0.00131093	0	0.00192405	0	0	0	0	0	0	0.00165195	0.000915222	0	0	0	0
AB486341.1.1395	Bacteria	Gemmatimonadetes	S0134 terrestrial group	uncultured bacterium	uncultured bacterium	uncultured bacterium	uncultured bacterium	B166_uncultured bacterium	Copiotroph	0.000431853	0.000791766	0.0011306	0.00112318	0.000444121	0.000827471	0.000580101	0.00270665	0.000310918	0.000815691	0.000712824	0.00117393	0.00283154	0.00490183	0.00274214	0.00330139	0.000430363	8.65276e-05	0.000643364	0.000857849	0.000545015	0.000306577	0.000717007	0.000812443	0.000789392	0.000695625	0.0010152	0.000598459
AB486437.1.1365	Bacteria	Planctomycetes	Planctomycetacia	Pirellulales	Pirellulaceae	Pirellula	uncultured bacterium	B7508_Pirellula	Copiotroph	0	0	0	0	0	0	0	0	0	2.52797e-05	4.75216e-06	0	0	0	0	0	1.86215e-05	0	7.86848e-05	0	3.8202e-05	1.37273e-05	5.01251e-05	0	0	0	0	0
AB486649.1.1358	Bacteria	Gemmatimonadetes	Gemmatimonadetes	Gemmatimonadales	Gemmatimonadaceae	Gemmatimonas	uncultured Gemmatimonas sp.	B86_Gemmatimonas	Copiotroph	0.00168306	0.00289732	0.00153097	0.00187637	0.000577835	0.000790938	0.00060637	0.00137994	0.00230968	0.00506436	0.00118091	0.00362075	0.00277292	0.00422899	0.00118366	0.00290622	0.000709685	0.00129564	0.00162461	0.00289865	0	0.000137273	0.00247356	0.00302137	0.00179031	0.00198338	0.00105475	0.000242791
AB486894.1.1364	Bacteria	Firmicutes	Clostridia	Clostridiales	#N/A	#N/A	#N/A	B14490_o_Clostridiales	Copiotroph	0	0	0	0	0	0	0	0	0	0	0	0	0	0	0	0	0	0	0	0	0	0	5.23044e-05	0	0	0	0	0
AB487131.1.1364	Bacteria	Gemmatimonadetes	Gemmatimonadetes	Gemmatimonadales	Gemmatimonadaceae	Gemmatimonas	uncultured Gemmatimonadaceae bacterium	B320_Gemmatimonas	Copiotroph	0.000336145	0.000120317	0.000433103	0.00103823	0	0	0.000728957	0.00120958	0.00175096	0.0025819	0.00115953	0.000518208	0.000865694	0.00218854	0.00124566	0.000103588	0	0.000327894	0	0	0	0	0.000477278	0.000290391	0.000268219	0	0.00125252	0.0002577
AB487860.1.1363	Bacteria	Bacteroidetes	Bacteroidia	Bacteroidales	#N/A	#N/A	#N/A	B7554_o_Bacteroidales	Copiotroph	2.80121e-05	0	0	0	0	0	1.09453e-05	0	0	0	1.18804e-05	3.01869e-05	0	0	0	0	0	0	0	0	0	1.60152e-05	9.37121e-05	0	0	0	0	2.76867e-05
AB488317.1.1388	Bacteria	Gemmatimonadetes	S0134 terrestrial group	uncultured compost bacterium	uncultured compost bacterium	uncultured compost bacterium	uncultured compost bacterium	B1052_uncultured compost bacterium	Copiotroph	0	0	0.000221588	0	0	0	0	0	0.000133251	0	0	0.000258265	0	0.000830074	0.000673556	0.00095723	0	0.000339279	0.000192083	0	0	0.00026997	0	0	0.000122116	0	0.000268082	0
ab4bc4171c0b5b854790d64d12b3415a	Bacteria	#N/A	#N/A	#N/A	#N/A	#N/A	#N/A	B3434_o_NA	Copiotroph	0	0	0	0	0	0	0	0	0.000296892	5.22447e-05	0	0	6.53779e-05	0	0	8.82416e-05	0	0	0	0.000100677	1.78276e-05	0	4.14077e-05	0.000107673	0	0	0	0
AB600415.1.1324	Bacteria	Chloroflexi	Dehalococcoidia	RBG-13-46-9	uncultured bacterium	uncultured bacterium	uncultured bacterium	B6951_uncultured bacterium	Copiotroph	0	0	0	0	0	0	0	0	0	0.000128084	5.46499e-05	0	4.50882e-05	0	0	0	0	0	0	0	0	0	0	0	0	0	0	0
AB619705.1.1436	Bacteria	Acidobacteria	Acidobacteriia	Solibacterales	Solibacteraceae (Subgroup 3)	Bryobacter	#N/A	B905_Bryobacter	Copiotroph	0	0	0	0	0	0	0	0	0	0.00178643	0	0	0	0.000248657	0.000820104	0.000590835	0	0	0.000840076	0.00059567	0	0	0	0	0	0	0	0
AB637256.1.1497	Bacteria	Firmicutes	Bacilli	Bacillales	Paenibacillaceae	Ammoniphilus	#N/A	B4874_Ammoniphilus	Copiotroph	0	0	0	0	0	0	0	0	3.74037e-05	0	0.000266121	0	0	0	0	0	0	0	0	0	2.80148e-05	0	8.28154e-05	0	0	0	0	8.30602e-05
AB649008.1.1514	Bacteria	Actinobacteria	Actinobacteria	Micrococcales	Intrasporangiaceae	Oryzihumus	Oryzihumus leptocrescens	B106_Oryzihumus	Copiotroph	0.00321672	0.00189015	0.00180544	0.00126853	0.0013252	0.00194903	0.000135722	0	0.00356504	0.00371274	0.00394192	0.00213656	0.000743955	0.00129996	0.00084265	0.000732789	0.00041588	0.00306262	0.00385324	0.00280426	0.000157901	0.000759578	0.00225781	0.00195443	0.00194731	0.00193927	0.000180187	0.000210845
AB672140.1.1478	Bacteria	Proteobacteria	Deltaproteobacteria	Myxococcales	Polyangiaceae	Pajaroellobacter	uncultured delta proteobacterium	B2121_Pajaroellobacter	Copiotroph	0	0	0	0	0	0	0.000297712	0	0	0	0	0	0.000534295	0.000409552	0.000496008	0	0	0	0	0	0	0	0	0	0	0	0	0
AB672158.1.1427	Bacteria	Planctomycetes	Phycisphaerae	Tepidisphaerales	WD2101 soil group	uncultured Planctomycetales bacterium	uncultured Planctomycetales bacterium	B170_uncultured Planctomycetales bacterium	Copiotroph	0.000548569	0.000380358	0.000584186	0.00205759	0.000687671	0	0.00069831	0.00055368	0.00135588	0.00327456	0.00178681	0.00217513	0.000800316	0.00162907	0.000563645	0.0015308	0.000246217	0.000644403	0.00242766	0.00160873	0.000137527	0.00038894	0.00135338	0.00220241	0.000992191	0.000972178	0.000533967	0.000266219
AB672214.1.1443	Bacteria	Acidobacteria	Blastocatellia (Subgroup 4)	Blastocatellales	Blastocatellaceae	JGI 0001001-H03	uncultured bacterium 164	B960_JGI 0001001-H03	Copiotroph	0	0	0	0	0	0	0	0	9.11716e-05	0.000279762	0	6.54049e-05	0.00102125	0.000585074	0.000975107	0.000107425	0	0.000396206	0.000740562	0.000176184	0	0	6.53806e-05	0	0.000226787	0.000196811	5.93297e-05	0
AB672236.1.1436	Bacteria	Actinobacteria	Coriobacteriia	OPB41	#N/A	#N/A	#N/A	B32_o_OPB41	Copiotroph	0	0.000539487	0.00122377	0	0.00148518	0.00282582	0.0022613	0.00330505	0.00479703	0.00548569	0.00453832	0.0054286	0.00285183	0.00285589	0.0031846	0.00491659	0.00396637	0.00156888	0.0015737	0.000566306	0.00515981	0.00332658	0.00537646	0.00578988	0.00181865	0.00278589	0.00186998	0.00179751
AB672241.1.1469	Bacteria	Proteobacteria	Gammaproteobacteria	Xanthomonadales	Xanthomonadaceae	uncultured	#N/A	B306_uncultured	Copiotroph	0.00211491	0.00197553	0.00258603	0.00189525	0.000124163	0.000210064	0.000201394	0.000132031	0.00168083	0.00154038	0	0.00032367	0	0	0.000295914	0.000199503	0	0	0.00202498	0.00303288	0	0	0	2.7734e-05	0	0	0	0
AB672299.1.1462	Bacteria	Proteobacteria	Deltaproteobacteria	Deltaproteobacteria Incertae Sedis	Unknown Family	Deferrisoma	uncultured bacterium	B2733_Deferrisoma	Copiotroph	1.63404e-05	5.82181e-05	0.000135974	0	9.07344e-05	0	0	0	1.63641e-05	0	0.00028513	5.19885e-05	3.60706e-05	0	0.000135275	0	0	0	0	0.000182476	0	0	0.000126402	0	9.15869e-05	0	0	0
AB722237.1.1383	Bacteria	Proteobacteria	Deltaproteobacteria	Desulfobacterales	Desulfobulbaceae	#N/A	#N/A	B5990_f_Desulfobulbaceae	Copiotroph	0	0	0	0	0	0	0	0	0	0	8.31628e-05	0	0	0	9.30015e-05	0	0	7.51424e-05	6.94277e-05	0	0	0	5.01251e-05	0	0	0	0	0
AB748619.1.1460	Bacteria	Proteobacteria	Gammaproteobacteria	Betaproteobacteriales	Gallionellaceae	#N/A	#N/A	B1174_f_Gallionellaceae	Copiotroph	0	0	0	0	0	0	0	0	0	0	0.000855389	0.000826784	0	0	0	0	0	0	0	0	0	0	0.00114852	0	0	0	0	0.000781618
AB748641.1.1460	Bacteria	Proteobacteria	Gammaproteobacteria	Betaproteobacteriales	Gallionellaceae	Sideroxydans	#N/A	B5_Sideroxydans	Copiotroph	0.00341047	0.00554042	0.0130233	0.0122795	0	0.00287332	0.0022416	0.000347115	0.00828726	0.0091445	0.000584516	0.00341615	0.0109722	0.0116247	0.0103936	0.0130502	0	0.00710665	0.00952317	0.0101474	0.00116134	0.00667376	0.00588861	0.00505738	0.00290243	0.00502716	0.0078491	0.00261533
AB748652.1.1448	Bacteria	Acidobacteria	Acidobacteriia	Acidobacteriales	uncultured	uncultured bacterium DA038	uncultured bacterium DA038	B498_uncultured bacterium DA038	Copiotroph	0.000450527	0	0	0	0.000365325	0	0	0	0	0.000170216	0	0.000461188	0.00105056	0.00233481	0.00115829	0.00266068	0	0.000350665	0.00039111	0.000723613	0	0.000407243	8.93534e-05	9.95161e-05	0	0	0	0
AB795489.1.1450	Bacteria	Chloroflexi	Anaerolineae	SJA-15	#N/A	#N/A	#N/A	B1713_o_SJA-15	Copiotroph	0	0	0	0	0	0	0	0	0	0	0.000508481	0.000149257	0	0	0.000394552	0.000757727	0	0	0	0	0	0	0	0	0	0	0	0.000349279
AB821089.1.1525	Bacteria	Actinobacteria	Thermoleophilia	Gaiellales	uncultured	uncultured Conexibacter sp.	uncultured Conexibacter sp.	B530_uncultured Conexibacter sp.	Copiotroph	0	0	0	0	0	0	0	0	0	0	0	0	0.00243702	0.00319048	0.000662283	0.000560142	0	0	0.00095116	0.00137382	0.000674901	0.000459865	0	0	0	0	0	0
AB930500.1.1491	Bacteria	Verrucomicrobia	Verrucomicrobiae	Pedosphaerales	Pedosphaeraceae	ADurb.Bin063-1	uncultured Verrucomicrobia bacterium	B82_ADurb.Bin063-1	Copiotroph	0.00125587	0	0	0.00132328	0	0.000577221	0	0.0011244	0.00312789	0.00317007	0.000591644	0.00506804	0.00471397	0.00542839	0.00217003	0.00335126	0.00134902	0	0.00091876	0.00196949	0.000863364	0.00192869	0.00116159	0.00348633	0.00133019	0.00572618	0.00215125	0
AB991298.1.1460	Bacteria	Proteobacteria	Gammaproteobacteria	Betaproteobacteriales	Gallionellaceae	#N/A	#N/A	B662_f_Gallionellaceae	Copiotroph	0	0	0	0	0	0	0	0	0.00156862	0.000690978	0.0017488	0.00207283	0	0	0	0.000253215	0	0	0	0	0	0.000656623	0.000566632	0	0	0	0	0
abe4481a57f9c8ac7512f64ab41c7d81	Bacteria	Firmicutes	Clostridia	Clostridiales	Peptococcaceae	Cryptanaerobacter	uncultured Firmicutes bacterium	B10973_Cryptanaerobacter	Copiotroph	0	0	0	0	0	0	0	0	0	0	0	0	5.41058e-05	2.5597e-05	3.10005e-05	0	0	0	0	0	0	0	0	0	0	0	0	0
ac8fe0e661f711b4c64069c9e6e418bf	Bacteria	Chloroflexi	Ktedonobacteria	Ktedonobacterales	Ktedonobacteraceae	Ktedonobacter	#N/A	B16651_Ktedonobacter	Copiotroph	0	0	0	0	0	0	0	0	0	0	2.13847e-05	0	0	0	1.69094e-05	0	0	0	0	0	0	0	0	0	0	0	0	0
acb4a37788efca8499d53cdbf38449ec	Bacteria	Proteobacteria	Gammaproteobacteria	Betaproteobacteriales	SC-I-84	#N/A	#N/A	B697_f_SC-I-84	Copiotroph	0.000476205	0	0.000553969	0	0	0	0	0	0	0	0	0	0.00214845	0.00114821	0.00129638	0.000464228	0	0.00068539	0	0	0.000170635	0	0	0	0	0	0.000920709	0
acb6ef63ba92e5fd71212c7f706b43f2	Bacteria	Planctomycetes	Planctomycetacia	Isosphaerales	Isosphaeraceae	#N/A	#N/A	B6011_f_Isosphaeraceae	Copiotroph	0	0	0	0	0	0	0	0	0	0	0	0	3.8325e-05	0	0.000383279	0	0	0	0	0	0	0	0	0	0	0	0	0
ad1b88d781beadb256f1f473625b7ee8	Bacteria	Omnitrophicaeota	uncultured bacterium	uncultured bacterium	uncultured bacterium	uncultured bacterium	uncultured bacterium	B8894_uncultured bacterium	Copiotroph	0	0	0	0	0	0	0	0	6.31188e-05	2.52797e-05	8.07868e-05	0	0	0	0	0	0	0	0	0	0	0	0	0	0	0	0	0
ae5c59f4a766bc74d5c76cb7ed78e91f	Bacteria	Dependentiae	Babeliae	Babeliales	#N/A	#N/A	#N/A	B14116_o_Babeliales	Copiotroph	0	0	0	0	0	0	0	0	0	0	2.13847e-05	2.85098e-05	0	0	0	0	0	0	0	0	0	0	0	0	0	0	0	0
af238ad8ac14c6095583cd0148f90355	Bacteria	Omnitrophicaeota	uncultured bacterium	uncultured bacterium	uncultured bacterium	uncultured bacterium	uncultured bacterium	B13757_uncultured bacterium	Copiotroph	0	0	0	0	0	0	0	0	4.20792e-05	0	2.37608e-05	0	0	0	0	0	0	0	0	0	0	0	0	0	0	0	0	0
AF293009.1.1470	Bacteria	Proteobacteria	Deltaproteobacteria	Myxococcales	Archangiaceae	Anaeromyxobacter	uncultured Green Bay ferromanganous micronodule bacterium MNF2	B1577_Anaeromyxobacter	Copiotroph	0	0	0	0	0	0	0	0	0.00060781	0	0	0.00103306	0	0	0	0	0	0	0.00045128	0.000171989	0	0	0	0	0	0	0	0
AF293012.1.1505	Bacteria	Nitrospirae	Nitrospira	Nitrospirales	Nitrospiraceae	Nitrospira	uncultured Green Bay ferromanganous micronodule bacterium MNF8	B1406_Nitrospira	Copiotroph	0	0	0	0	0	0	0	0	0.000708333	0.000276391	0.000273249	0.000234787	0	0	0	0	0	0	0.000247626	0	0	0	0.000204859	0.000686824	0	0	0	0
AF498717.1.1397	Bacteria	Proteobacteria	Alphaproteobacteria	Micropepsales	Micropepsaceae	uncultured	bacterium Ellin335	B1662_uncultured	Copiotroph	0	0	0	0	0	0	0	0	0.000282866	0.000247741	0.000135437	0	0	0	0	0	0	0	0.000525336	0	0	0	0.000320365	0.000352385	0	0.000232441	0	0
AF506243.1.1376	Bacteria	Cyanobacteria	Oxyphotobacteria	Nostocales	Nostocaceae	Nostoc PCC-73102	#N/A	B4793_Nostoc PCC-73102	Copiotroph	0	0	0	0	0	0	0	0	0	0	0.000137813	0	0	0	0	0	0	0	0.000136541	0	0.000203744	5.49092e-05	0	0	0	0	0	0
AF523975.1.1298	Bacteria	Proteobacteria	Gammaproteobacteria	Betaproteobacteriales	SC-I-84	#N/A	#N/A	B2785_f_SC-I-84	Copiotroph	0	0	0	0	0	0	0	0	0	0	0	0	0.000432847	0.000235858	0	0.000389414	0	0	0	0	0	0	0	0	0	0	0	0
AF524003.1.1309	Bacteria	Nitrospirae	Thermodesulfovibrionia	uncultured	uncultured prokaryote	uncultured prokaryote	uncultured prokaryote	B665_uncultured prokaryote	Copiotroph	0	0	0.000780593	0	0	0	0	0	0	0	0	0	0.000624472	0.00298388	0.000465007	0.00253407	0	0	0	0	0	0	0	0	0	0	0	0
afa6a720582b5996814d6b6f3a6791bc	Bacteria	Bacteroidetes	Ignavibacteria	Kryptoniales	BSV26	Ignavibacteria bacterium RIFCSPLOWO2_12_FULL_56_21	Ignavibacteria bacterium RIFCSPLOWO2_12_FULL_56_21	B11407_Ignavibacteria bacterium RIFCSPLOWO2_12_FULL_56_21	Copiotroph	0	0	0	0	0	0	0	0	0	0	0	7.54671e-05	0	0	0	0	0	0	0	0	0	0	0	0	0	0	0	0
aff09dbe642f1a790f666e3b6822f64e	Bacteria	Planctomycetes	Phycisphaerae	Tepidisphaerales	WD2101 soil group	#N/A	#N/A	B3296_f_WD2101 soil group	Copiotroph	0	0	0	0	0	0	0	5.1109e-05	0	4.71887e-05	9.74193e-05	0	0.000151045	8.77612e-05	9.58197e-05	0.000140036	3.51739e-05	0	0.000129598	0	0	0	0	0	0	0	1.97766e-05	0
AJ249106.1.1488	Bacteria	Chloroflexi	Anaerolineae	SJA-15	uncultured bacterium SHA-3	uncultured bacterium SHA-3	uncultured bacterium SHA-3	B5253_uncultured bacterium SHA-3	Copiotroph	0	0	0	0	0	0	0	0	0.000420792	1.85384e-05	0	0	0	0	0	0	0	0	0	0	0	0	0	0	0	0	0	0
AJ519406.1.1320	Bacteria	Bacteroidetes	Ignavibacteria	Kryptoniales	BSV26	uncultured Chlorobi bacterium	uncultured Chlorobi bacterium	B4222_uncultured Chlorobi bacterium	Copiotroph	0	0	0	0	0	0	0	0	0	1.68531e-05	0.000104548	0.000365596	0	0	0	0	0	0	0	0	0	0	0	0	0	0	0	0
AJ581623.1.1457	Bacteria	Proteobacteria	Deltaproteobacteria	Myxococcales	Haliangiaceae	Haliangium	uncultured prokaryote	B437_Haliangium	Copiotroph	0	0	0	0.000581411	0.000845262	0	0.00108796	0.000811355	0	0	0	0	0.0021958	0.000764253	0.00268859	0.000654139	0	0	0.000752134	0	0.0010773	0	0.00141004	0.000593834	0	0	0	0
AJ617852.1.1436	Bacteria	Acidobacteria	Acidobacteriia	Solibacterales	Solibacteraceae (Subgroup 3)	Bryobacter	uncultured Acidobacteriaceae bacterium	B6464_Bryobacter	Copiotroph	0	0	0	0	0	0	0	0	0	0	0	0.000228078	0	0	0	0	0	0	0	0	0	0	0	0	0	0	0	0
AJ863370.1.1411	Bacteria	Proteobacteria	Alphaproteobacteria	Sphingomonadales	Sphingomonadaceae	Porphyrobacter	#N/A	B103_Porphyrobacter	Copiotroph	0.000996762	0.0013526	0.000241732	0.000511566	0.00101957	0.000301397	0.00146448	0.00113292	0.00460066	0.00395543	0.00530341	0.00286775	0.000117229	0.000135298	0.000586191	0.00139844	0.000473813	0.000375712	0.000724363	8.17998e-05	0.000193557	9.8379e-05	0.00440011	0.00437218	0.000963843	0.000564983	0.00234902	0.00738384
AM071380.1.1299	Bacteria	Proteobacteria	Deltaproteobacteria	Desulfuromonadales	Geobacteraceae	Geobacter	#N/A	B2115_Geobacter	Copiotroph	0	0	0	0	0	0	0	0	0	0.000202237	0.000712824	0.000353857	0	0	0	0	0	0	0.000330939	0	0	0	0	0	0	0	0	0
AM086158.1.1457	Bacteria	Bacteroidetes	Ignavibacteria	Kryptoniales	BSV26	#N/A	#N/A	B913_f_BSV26	Copiotroph	0	0	0	0.000968389	0	0	0	0.000304524	0	0	0.000323147	0.00249042	0	0	0	0	0	0	0	0	0	0	0.000283316	0	0	0	0	0
AM292612.1.1278	Bacteria	Acidobacteria	Acidobacteriia	Solibacterales	Solibacteraceae (Subgroup 3)	Bryobacter	uncultured Holophaga sp.	B422_Bryobacter	Copiotroph	0.000709639	0	0	0	0	0.000168052	0	0	0	0.00056795	0	0	0.000369723	0.0040681	0.00132457	0.00247844	0	0	0	0.00183525	0	0.000473592	0	0.00037033	0	0	0	0
AM697455.1.1452	Bacteria	Firmicutes	Clostridia	Clostridiales	Clostridiaceae 1	Clostridium sensu stricto 8	uncultured Clostridium sp.	B3692_Clostridium sensu stricto 8	Copiotroph	0	0	0	0	0	0	0	0	0	0	0.000361164	0	0.000417066	0	0	0	0	0	0	0	0	0	0	0	0	0	0	0
AM935626.1.1356	Bacteria	Proteobacteria	Gammaproteobacteria	Steroidobacterales	Steroidobacteraceae	uncultured	uncultured Methylococcaceae bacterium	B299_uncultured	Copiotroph	0.000189081	0.000188238	0	4.71924e-05	0.00031757	9.3159e-05	0.000278011	0.000751728	0.000656903	0.00124376	0.00135199	0.001885	0.000261512	0.000327276	0	0.00058508	0.000616578	0.000455409	0.00161998	0.00131928	0.000221571	0.000144137	0.000623295	0.000864648	0.000913688	0.000802514	0.00054056	0.00205308
AM936376.1.1338	Bacteria	Actinobacteria	Actinobacteria	Frankiales	Geodermatophilaceae	Blastococcus	#N/A	B670_Blastococcus	Copiotroph	0	0.000118377	0.000188853	9.81603e-05	0.000346223	0	0	0.000163975	0.000390401	0.00234764	0.000501353	0.00145903	0	0	0	0	0	0.000302847	0.000344824	0.000184574	0	0	0.000254984	0.000154984	0	7.97424e-05	0	0
AM943572.1.1409	Bacteria	Firmicutes	Clostridia	Clostridiales	Lachnospiraceae	Natranaerovirga	uncultured bacterium	B11621_Natranaerovirga	Copiotroph	0	0	0	0	0	0	0	0	0	3.37062e-05	5.46499e-05	0	0	0	0	0	0	0	0	0	0	0	0	0	0	0	0	0
ARFB01000021.118844.120350	Bacteria	Bacteroidetes	Bacteroidia	Chitinophagales	Chitinophagaceae	Segetibacter	Segetibacter koreensis DSM 18137	B1576_Segetibacter	Copiotroph	0.000289458	0	0	0.000179331	0	0	0	0	0.000187019	0.000357286	0.000641542	0.000109008	0	0	0	0	0	0	0.000148112	0	0	0	0.000224473	0.000137039	0.000124296	0	0	0
AY167840.1.1293	Bacteria	Proteobacteria	Alphaproteobacteria	Sphingomonadales	Sphingomonadaceae	Sphingomonas	#N/A	B6352_Sphingomonas	Copiotroph	0	0	0	0	0	0	0	0	0.00010286	0	1.18804e-05	0	0	0	0	0.000174565	0	0	0	0	0	0	0	0	0	0	0	0
AY212728.1.1312	Bacteria	Bacteroidetes	Bacteroidia	Cytophagales	Microscillaceae	#N/A	#N/A	B10638_f_Microscillaceae	Copiotroph	0	0	0	0	0	0	0	0	9.35093e-05	0	0	0	0	0	0	0	0	0	0	0	0	0	2.83316e-05	0	0	0	0	0
AY395371.1.1464	Bacteria	Proteobacteria	Deltaproteobacteria	Desulfarculales	Desulfarculaceae	uncultured	metagenome	B647_uncultured	Copiotroph	0.000233434	0.000246456	0.000178781	0	0.000546794	0.000898711	3.94031e-05	0	0.000126238	0.00032695	0.000548875	0.000947532	0.000338162	0.000446119	0.00017473	0.000205258	0	0	0.000557736	0.00066908	0.00013498	0.000178455	5.44838e-05	0.000223503	0.000414322	0.00027825	0	0
AY395403.1.1447	Bacteria	Actinobacteria	Thermoleophilia	Gaiellales	uncultured	uncultured Conexibacter sp.	uncultured Conexibacter sp.	B511_uncultured Conexibacter sp.	Copiotroph	0	0	0	0	0	0	0	0	0	0	0	0	0	0.00148645	0.00240113	0.00188377	0	0	0.00197175	0.00229669	0.000595951	0.000514774	0	0	0	0	7.91063e-05	0
AY425764.1.1406	Bacteria	Proteobacteria	Alphaproteobacteria	Reyranellales	Reyranellaceae	Reyranella	#N/A	B116_Reyranella	Copiotroph	0.000401506	0.0005162	0	0.000217085	0.000771242	0.00147776	0.00330329	0.00308996	0.00335698	0.00300491	0.00243311	0.00275204	0	0.000917835	0.00079474	0.00153847	0.000169662	0.000204934	0.00171024	0.00141996	0.00238635	0.00261048	0.00389232	0.00299038	0.000774127	0.00214626	0.00137777	0.000998852
AY571791.1.1424	Bacteria	Acidobacteria	Blastocatellia (Subgroup 4)	Blastocatellales	Blastocatellaceae	#N/A	#N/A	B45_f_Blastocatellaceae	Copiotroph	0.000756325	0.00013002	0	0	0.00345029	0.00229244	0.000291145	0	0.00612486	0.00740863	0.00535094	0.00557954	0.000480189	0.00152485	0.00118647	0.00178018	0.00339738	0.00178292	0.0046424	0.000555819	0.00126321	0.00127206	0.00486867	0.00489424	0.00324261	0.00282661	0.00153159	0.00619544
AY587228.1.1419	Bacteria	Acidobacteria	Acidobacteriia	Acidobacteriales	Acidobacteriaceae (Subgroup 1)	Terriglobus	#N/A	B7513_Terriglobus	Copiotroph	0	0	0	0	0	0	0	0	0.000109873	0	0.000135437	0	0	0	0	0	0	0	0	0	0	0	0	0	0	0	0	0
AY921798.1.1414	Bacteria	Gemmatimonadetes	S0134 terrestrial group	uncultured Gemmatimonadetes bacterium	uncultured Gemmatimonadetes bacterium	uncultured Gemmatimonadetes bacterium	uncultured Gemmatimonadetes bacterium	B1399_uncultured Gemmatimonadetes bacterium	Copiotroph	0	0	0	0	0	0	0	0	0.000294554	0.000475258	0	0.000412554	0	0	0	0	0	0	0	0	0	0	0.000207038	0.000983741	0	0	0	0
AY921903.1.1408	Bacteria	Latescibacteria	uncultured Pelobacter sp.	uncultured Pelobacter sp.	uncultured Pelobacter sp.	uncultured Pelobacter sp.	uncultured Pelobacter sp.	B872_uncultured Pelobacter sp.	Copiotroph	2.80121e-05	3.10496e-05	0	0.000132139	5.96937e-05	0.00031053	0	2.55545e-05	0.000465209	0.000436496	0.000715201	0.000729516	0.00013301	2.37686e-05	7.04557e-05	0.000283908	0.000800723	9.56358e-05	5.78564e-05	6.29229e-05	0.000236852	8.46517e-05	0	0.000133776	4.36128e-05	0.000167968	0	3.62057e-05
AY963409.1.1440	Bacteria	Acidobacteria	Acidobacteriia	Subgroup 2	#N/A	#N/A	#N/A	B15851_o_Subgroup 2	Copiotroph	0	0	0	0	0	0	0	0	0	0	0	0	2.70529e-05	0	1.69094e-05	0	0	0	0	0	0	0	0	0	0	0	0	0
b14bc63755635712dc1040f63dfc47aa	Bacteria	Chloroflexi	Anaerolineae	SBR1031	anaerobic bacterium MO-CFX2	anaerobic bacterium MO-CFX2	anaerobic bacterium MO-CFX2	B1281_anaerobic bacterium MO-CFX2	Copiotroph	0	0	0	0	5.96937e-05	0.000109599	0	0	8.64961e-05	0.000109545	0.000929048	0.000441064	0	0	0.000112729	0	0.000931074	0	0.000138855	0	0.000157901	0.000187607	0	0	0	0	0	0
b1b9f862b7d098578015752f0e61bca2	Bacteria	Acidobacteria	Acidobacteriia	Subgroup 12	uncultured bacterium	uncultured bacterium	uncultured bacterium	B2903_uncultured bacterium	Copiotroph	9.57079e-05	0	0.000304683	0.000151016	0	0	0	0	0	0	0	6.03737e-05	0.000146537	0.000148097	0	0	0	0	0.000111084	0	0	0	4.3587e-05	0	0	0	0	0
b28ccdb9e5398805a12da618de0baf1b	Bacteria	Proteobacteria	Gammaproteobacteria	Legionellales	Legionellaceae	Legionella	#N/A	B12384_Legionella	Copiotroph	0	0	0	0	0	0	0	0	8.64961e-05	0	0	0	0	0	0	0	0	0	0	0	0	0	0	0	0	0	0	0
b2c3a16946f919640bca9fd76902ea0d	Bacteria	Elusimicrobia	Lineage IIb	#N/A	#N/A	#N/A	#N/A	B11505_o_NA	Copiotroph	0	0	0	0	0	0	0	0	0	0	7.60346e-05	0	0	0	3.38187e-05	0	0	0	0	0	0	0	0	0	0	0	0	0
b37bd846cd641268ca540c5b6622037b	Bacteria	Chloroflexi	Ktedonobacteria	C0119	uncultured soil bacterium	uncultured soil bacterium	uncultured soil bacterium	B7514_uncultured soil bacterium	Copiotroph	0	0	0	0	0	0	0	0	0.000119224	0	0.000125932	0	0	0	0	0	0	0	0	0	0	0	0	0	0	0	0	0
b3ac5989ec62b61bd10b3dceaa471adf	Bacteria	Chloroflexi	Dehalococcoidia	#N/A	#N/A	#N/A	#N/A	B13225_o_NA	Copiotroph	0	0	0	0	0	0	0	0	0	3.70769e-05	0	0	9.01764e-06	0	0	0	0	0	0	0	0	0	1.08968e-05	0	0	0	0	0
b41e40453a4151379e7dd4fe0ce3138a	Bacteria	Gemmatimonadetes	S0134 terrestrial group	#N/A	#N/A	#N/A	#N/A	B3104_o_NA	Copiotroph	0	0	0	0	0	0	0	0	0.000341309	0	0.000520362	0	0	0	0	0	0	0	0	0	0	0	0	0	0	0	0.000162607	0
b4880428811fefca6e13a3e647679c9d	Bacteria	Chloroflexi	Anaerolineae	Anaerolineales	Anaerolineaceae	uncultured	uncultured Bellilinea sp.	B578_uncultured	Copiotroph	0	0	0	0	7.40201e-05	0	0	0	0.000458196	6.06712e-05	0.000591644	0.000496406	0	0	0	0	0.000273115	0	0.000319368	0	0	0	0.00290726	0.00221219	0	0	0	0.00137795
b48c20f39c2abe185f6a0f9a35f828f2	Bacteria	Patescibacteria	Berkelbacteria	uncultured bacterium	uncultured bacterium	uncultured bacterium	uncultured bacterium	B13765_uncultured bacterium	Copiotroph	0	0	0	0	0	0	0	0	0	0	0	0	2.25441e-05	2.5597e-05	1.12729e-05	0	0	0	0	0	0	0	0	0	0	0	0	0
b4cbb56d70dbbcec80cb3237e997ed51	Bacteria	#N/A	#N/A	#N/A	#N/A	#N/A	#N/A	B13766_o_NA	Copiotroph	0	0	0	0	0	0	0	0	0	0	6.65303e-05	0	0	0	0	0	0	0	0	0	0	0	0	0	0	0	0	0
b56f5f88bd6311968813e26306363ae9	Bacteria	Chlamydiae	Chlamydiae	Chlamydiales	Parachlamydiaceae	#N/A	#N/A	B14904_f_Parachlamydiaceae	Copiotroph	0	0	0	0	0	0	0	0	5.14301e-05	0	0	0	0	0	0	0	0	0	0	0	0	0	0	0	0	0	0	0
b56fcbc1608751a2446e850e0f7ff44a	Bacteria	Dependentiae	Babeliae	Babeliales	Vermiphilaceae	uncultured Candidatus Dependentiae bacterium	uncultured Candidatus Dependentiae bacterium	B10030_uncultured Candidatus Dependentiae bacterium	Copiotroph	0	0	0	0	0	0	0	0	0	0	6.89064e-05	0	0	0	0	0	0	0	0	0	0	0	0	0	0	0	0	6.60222e-05
b5cb6ee1827405463e79ee47aec04e5a	Bacteria	Proteobacteria	#N/A	#N/A	#N/A	#N/A	#N/A	B16348_o_NA	Copiotroph	0	0	0	0	0	0	0	0	7.0132e-06	0	0	8.38524e-06	9.01764e-06	3.65671e-06	0	3.83659e-06	0	0	0	0	0	0	0	0	0	0	0	0
b6ccfe5299d8a98c8228b49a946879d3	Bacteria	Proteobacteria	Deltaproteobacteria	MBNT15	#N/A	#N/A	#N/A	B4256_o_MBNT15	Copiotroph	0	0	0	0	0	0	0	0	0	0	0	0	0	0	0.00039737	0	0	0	0	0	0	0	0.000274598	0	0	0	0	0
b6f740eccda6e974e268d6cfab3defd0	Bacteria	Elusimicrobia	Lineage IIc	uncultured bacterium	uncultured bacterium	uncultured bacterium	uncultured bacterium	B7691_uncultured bacterium	Copiotroph	0	0	0	0	0	0	0	0	0	0	0	0	0	0	2.5364e-05	0.000159219	0	0	1.85141e-05	0	0	0	0	0	0	0	0	0
b7a2df45a9af3b82377a25d5e108309d	Bacteria	Spirochaetes	Spirochaetia	Spirochaetales	Spirochaetaceae	Spirochaeta 2	Spirochaeta sp.	B9706_Spirochaeta 2	Copiotroph	0	0	0	0	0	0	0	0	1.87019e-05	0	0.000133061	0	0	0	0	0	0	0	0	0	0	0	0	0	0	0	0	0
b7fbbb7dd13a147921349c12c1ecd65f	Bacteria	Proteobacteria	Deltaproteobacteria	SAR324 clade(Marine group B)	metagenome	metagenome	metagenome	B11858_metagenome	Copiotroph	0	0	0	0	1.19387e-05	0	0	0	2.57151e-05	0	0	0	2.02897e-05	0	1.97276e-05	0	0	0	0	0	0	0	6.53806e-06	0	0	0	0	1.27785e-05
b8463c573311ad4e96d212bf5603a9cb	Bacteria	Proteobacteria	Gammaproteobacteria	KI89A clade	#N/A	#N/A	#N/A	B866_o_KI89A clade	Copiotroph	0	0	0	0	7.40201e-05	4.56662e-05	0	4.25908e-06	2.80528e-05	0	0.000228104	0.000124102	6.76323e-05	0	0.000200094	0.000195666	0.000184146	3.41556e-05	0.000185141	0	0.00218006	0.00185319	0	0	2.3987e-05	3.73262e-05	6.59219e-06	0.000562254
b8f46dfc3139740479087aebe8f13146	Bacteria	#N/A	#N/A	#N/A	#N/A	#N/A	#N/A	B17943_o_NA	Copiotroph	0	0	0	0	0	0	0	0	0	0	4.75216e-06	0	4.50882e-06	0	0	0	0	0	0	8.38972e-06	0	0	0	0	0	0	0	6.38925e-06
b98d175520f15f9199dbe17fb0688220	Bacteria	Chloroflexi	Anaerolineae	SJA-15	metagenome	metagenome	metagenome	B1526_metagenome	Copiotroph	0	0	0	0	0	0	0	0	0.000535341	0	0.000384925	0	0	0	0.000273368	0	0	0.000364327	0.000502194	0.000438363	0	0.00032488	0	0	0	0	0	0
b993d54cf62969e1b7eac54c8a92248d	Bacteria	Elusimicrobia	Elusimicrobia	MVP-88	uncultured bacterium	uncultured bacterium	uncultured bacterium	B12135_uncultured bacterium	Copiotroph	0	0	0	0	0	0	0	0	9.11716e-05	0	0	0	0	0	0	0	0	0	0	0	0	0	0	0	0	0	0	0
b9a3164e475781c3e5312d999a92b310	Bacteria	Patescibacteria	Parcubacteria	Candidatus Yanofskybacteria	uncultured bacterium	uncultured bacterium	uncultured bacterium	B2288_uncultured bacterium	Copiotroph	0	0	0	1.13262e-05	0	2.55731e-05	3.06468e-05	3.19431e-05	9.11716e-05	6.57272e-05	8.31628e-05	9.72688e-05	8.11588e-05	0.000149925	3.10005e-05	4.22025e-05	0	2.27704e-05	9.25703e-06	0	0.000313256	0.00043241	0	0	0	0	0	0
b9cf7bf883ca71a1e28348f107753f21	Bacteria	Patescibacteria	Microgenomatia	Candidatus Woesebacteria	groundwater metagenome	groundwater metagenome	groundwater metagenome	B3303_groundwater metagenome	Copiotroph	0	0	0	0	3.58162e-05	0	2.84578e-05	0.000149068	0	0	3.56412e-05	0	4.50882e-05	5.85074e-05	0.000186003	0.000132362	0	0	2.31426e-05	0	0	2.74546e-05	1.96142e-05	1.63141e-05	0	2.3753e-05	0	8.73197e-05
b9e0e1ee7e1bb5e0879c679b997654cd	Bacteria	Armatimonadetes	DG-56	uncultured bacterium	uncultured bacterium	uncultured bacterium	uncultured bacterium	B11088_uncultured bacterium	Copiotroph	0	0	0	0	0	0	0	0	0	0	0	0	0	0	0	0	0	0	0	0	0	0	0.000104609	0	0	0	0	0
ba0d4187668a4a7da37c3219692865eb	Bacteria	Chloroflexi	Dehalococcoidia	GIF9	uncultured soil bacterium	uncultured soil bacterium	uncultured soil bacterium	B4319_uncultured soil bacterium	Copiotroph	1.86747e-05	0	3.27345e-05	6.60694e-05	0	0	0	0	3.74037e-05	0	3.32651e-05	4.19262e-05	3.60706e-05	1.27985e-05	7.04557e-05	0	1.44834e-05	6.14802e-05	1.15713e-05	3.14614e-05	0	8.92275e-05	0	0	0	0	1.0987e-05	8.51899e-06
ba418011b75959ef607099d80bee2aa8	Bacteria	Chlamydiae	Chlamydiae	Chlamydiales	Simkaniaceae	uncultured	#N/A	B11860_uncultured	Copiotroph	0	0	0	0	0	0	0	0	0	0	2.61369e-05	0	0	0	8.45468e-05	0	0	0	0	0	0	0	0	0	0	0	0	0
babccc444437c80b52a784837eb11070	Bacteria	Chloroflexi	Anaerolineae	Anaerolineales	Anaerolineaceae	Pelolinea	uncultured bacterium	B3641_Pelolinea	Copiotroph	0	0	0	0	0	0	9.19405e-05	0	0	4.21328e-05	0	5.53426e-05	9.24308e-05	0	0.000115547	3.45293e-05	0	0	0	0	0.000183369	6.40608e-05	5.88425e-05	0	0	0	0	3.62057e-05
bb689bec0268e89abd050991d0001e1e	Bacteria	Chloroflexi	Anaerolineae	SBR1031	uncultured bacterium	uncultured bacterium	uncultured bacterium	B455_uncultured bacterium	Copiotroph	5.13554e-05	5.23963e-05	7.55413e-05	6.79571e-05	0.000202958	0.000100466	0.000330548	0.000336467	0.00136757	0.0019162	0.000776979	0.000997843	0.000331398	0.00040041	0.000532645	0.000604263	0.000159317	5.2372e-05	0.000273082	0.00029364	0.000402394	0.000304289	0.000549197	0.000613411	0.0001352	0.000291823	6.15271e-05	0.000249181
bba9c8fd60dc1d73ca8c294c294cf567	Bacteria	Actinobacteria	Thermoleophilia	Gaiellales	uncultured	#N/A	#N/A	B6796_f_uncultured	Copiotroph	0	0	0	0	0	0	0	0	0	0	0.000137813	0	0.000148791	0	0	0	0	0	0	0	0	0	0	0	0	0	0	0
bc12e9fc3eb62c54b70c8b031db1b1b1	Bacteria	Chloroflexi	Dehalococcoidia	SAR202 clade	uncultured bacterium	uncultured bacterium	uncultured bacterium	B1387_uncultured bacterium	Copiotroph	0	0	0	0.000198208	0	9.13324e-05	0	0	6.54565e-05	0	0	0.000174413	0.000241222	9.87313e-05	0.000250822	0.000226359	0.000171731	0.00032334	0.000305482	0.000176184	8.91379e-05	0.000134985	0.00026806	0	6.54192e-05	0	5.93297e-05	0
bca740c793be0eb1b8ee50daf97b181b	Bacteria	WS2	#N/A	#N/A	#N/A	#N/A	#N/A	B8576_o_NA	Copiotroph	0	0	0	0	0	0	0	0	0	0	0	0	0	0	0	0	0	0	0	0	0	0	0.000178707	0	0	0	0	0
bca8313b616ba0882e228df83262b790	Bacteria	Cyanobacteria	Melainabacteria	Vampirovibrionales	#N/A	#N/A	#N/A	B10892_o_Vampirovibrionales	Copiotroph	0	0	0	0	0	0	0	0	4.67546e-06	1.34825e-05	7.12824e-05	0	0	0	0	0	0	0	0	0	0	0	2.17935e-05	0	0	0	0	0
bd1d191dc0780c0a1cba4a18e1017506	Bacteria	Proteobacteria	Gammaproteobacteria	Coxiellales	Coxiellaceae	Coxiella	uncultured bacterium UASB_TL22	B6465_Coxiella	Copiotroph	0	0	0	0	0	0	0	0	0	0	0	0	0.000175844	0	0	0	0	0	0	0	0	0	0.000126402	0	0	0	0	0
bd55b8ddbfb0c66ac60a5b0d96483775	Bacteria	Bacteroidetes	Bacteroidia	Chitinophagales	Chitinophagaceae	uncultured	Chitinophaga sp. BN130233	B423_uncultured	Copiotroph	0	0	5.28789e-05	0	0.000336672	5.29728e-05	0.000411543	1.91659e-05	0.000911716	0.000358971	0.00139714	0.000488021	7.66499e-05	0.000138955	9.58197e-05	0	0.000122074	0.00032334	0.000985874	0.00044885	0.000394754	0.000414107	0.00149721	0.000546523	0.0014981	0.000337633	0.000123054	0.00214892
bdafee8a8d8623e8f66f6bd3b89ed20c	Bacteria	Proteobacteria	Deltaproteobacteria	SAR324 clade(Marine group B)	uncultured bacterium	uncultured bacterium	uncultured bacterium	B14908_uncultured bacterium	Copiotroph	0	0	0	0	0	0	0	0	0	0	4.51455e-05	0	0	0	8.45468e-06	0	0	0	0	0	0	0	0	0	0	0	0	0
bf5ee073b3e8962a01f83759afd6121f	Bacteria	Proteobacteria	Deltaproteobacteria	Oligoflexales	Oligoflexaceae	Silvanigrella	#N/A	B12265_Silvanigrella	Copiotroph	1.86747e-05	2.32872e-05	0	0	0	0	0	0	0	0	1.42565e-05	1.17393e-05	0	0	0	0	0	0	0	0	0	1.14394e-05	0	0	0	0	0	0
bf6eb044b22db77afa72a1a806b397fd	Bacteria	Chloroflexi	TK10	uncultured Chloroflexi bacterium	uncultured Chloroflexi bacterium	uncultured Chloroflexi bacterium	uncultured Chloroflexi bacterium	B2551_uncultured Chloroflexi bacterium	Copiotroph	0	0	0	0	0	0	0	0	9.35093e-06	4.21328e-05	0	0.000162674	0.000146537	0.000228545	9.8638e-05	0.00014579	0	0	0.000138855	0	3.56552e-05	0.000201334	0	0	0	0	0	0
c15643e94467a955983cfab6c59a5acf	Bacteria	#N/A	#N/A	#N/A	#N/A	#N/A	#N/A	B16674_o_NA	Copiotroph	0	0	0	0	0	0	0	0	4.67546e-06	0	1.90087e-05	0	0	0	1.40911e-05	0	0	0	0	0	0	0	0	0	0	0	0	0
c15b27a3cce1ac09643d5261c19f4b7d	Bacteria	Armatimonadetes	DG-56	uncultured bacterium	uncultured bacterium	uncultured bacterium	uncultured bacterium	B4265_uncultured bacterium	Copiotroph	0	0	0	0	0	0	0	0	6.54565e-05	6.57272e-05	0	8.72065e-05	0.000178098	0	0.000115547	0	0	6.14802e-05	0	0	0	0	0	0	0	0	0	0
c25b536a76cbb33a2179ae52bf79b63b	Bacteria	Armatimonadetes	Fimbriimonadia	Fimbriimonadales	Fimbriimonadaceae	#N/A	#N/A	B1669_f_Fimbriimonadaceae	Copiotroph	0	0	0.000125902	0.000120813	0	0	0	0	9.5847e-05	0.000175272	0.000218599	0.00017609	9.01764e-05	0.000206604	0	0.000153464	0	7.28654e-05	0.000178198	0.000283153	0	0	0.000244087	0	0	0	0	0
c26e6c9563b5424164e4332248b3101d	Bacteria	Chloroflexi	Anaerolineae	SBR1031	uncultured Gemmatimonadetes bacterium	uncultured Gemmatimonadetes bacterium	uncultured Gemmatimonadetes bacterium	B1783_uncultured Gemmatimonadetes bacterium	Copiotroph	0	0.000413348	0	0	0	0	0	0	0.00043248	0.000490426	0	0.000150934	0	0	0	0	0	0	9.71988e-05	0	0	0	0	0	0.000292206	0	0	0
c2d57cef214acda21191f93c48049968	Bacteria	Elusimicrobia	Elusimicrobia	MD2894-B20	uncultured bacterium	uncultured bacterium	uncultured bacterium	B13772_uncultured bacterium	Copiotroph	0	0	0	0	0	0	0	0	0	0	2.37608e-05	0	0	0	0	0	0	0	0	0	0	2.74546e-05	1.30761e-05	0	0	0	0	0
c30d0f36866c2a08857861cd004ead69	Bacteria	Zixibacteria	bacterium enrichment culture clone Anammox_55	bacterium enrichment culture clone Anammox_55	bacterium enrichment culture clone Anammox_55	bacterium enrichment culture clone Anammox_55	bacterium enrichment culture clone Anammox_55	B1434_bacterium enrichment culture clone Anammox_55	Copiotroph	0.000170407	7.56835e-05	0.000181299	6.60694e-05	5.49182e-05	3.28797e-05	9.41296e-05	1.49068e-05	0.000448845	9.94334e-05	0.000116428	0	0.000525278	0	7.32739e-05	5.94672e-05	0	3.64327e-05	0.000113399	0.000169892	8.14975e-05	0.000107531	0	0	0	0	0.000393334	0
c42159e95c6a83e5c084c4861e61c582	Bacteria	Chloroflexi	KD4-96	#N/A	#N/A	#N/A	#N/A	B1003_o_NA	Copiotroph	0	0	0.000581668	0.000300144	0.000105061	0	0	0	0.00114081	0.000325265	0.000294634	0	0.00153074	0	0.000496008	0	0	0	0	8.17998e-05	0	0	0	0	0	0	0	0
c45b16a1d804f036fc045cae8e5734c8	Bacteria	Chloroflexi	Anaerolineae	C10-SB1A	uncultured bacterium	uncultured bacterium	uncultured bacterium	B4992_uncultured bacterium	Copiotroph	5.13554e-05	0	4.78428e-05	0	0	0	0	0	0	2.86503e-05	0	5.36655e-05	5.41058e-05	5.85074e-05	2.5364e-05	2.49378e-05	0	0	4.85994e-05	0	0	4.11819e-05	0	0	0	0	0	0
c49a1fd0c8402d5e9430c0339211abfc	Bacteria	Chloroflexi	Dehalococcoidia	Dehalococcoidales	Dehalococcoidaceae	Dehalogenimonas	Dehalogenimonas sp. enrichment culture clone CG3	B15869_Dehalogenimonas	Copiotroph	0	0	0	0	0	0	0	0	0	0	0	0	9.01764e-06	0	3.94552e-05	0	0	0	0	0	0	0	0	0	0	0	0	0
c4b31a8cf3b6ed228528c844ff504638	Bacteria	#N/A	#N/A	#N/A	#N/A	#N/A	#N/A	B7269_o_NA	Copiotroph	0	0	0	0	0	0	0	1.27772e-05	0	0	2.61369e-05	0	4.73426e-05	0	1.69094e-05	3.2611e-05	0	0	0	5.66306e-05	0	5.03335e-05	0	0	0	0	0	0
c58876815f50650edce30d7678f1f7e0	Bacteria	Spirochaetes	Leptospirae	Leptospirales	Leptospiraceae	uncultured	uncultured bacterium	B2754_uncultured	Copiotroph	0	0	0	0	0	0	0	0	0	0	0	0	0.000252494	0	0.000436825	0.000310764	2.27596e-05	0.000102467	0	0	0	7.55002e-05	0	0	0	0	3.07636e-05	0
c5b58f30a4fd2d1c2d62e828df0a1ac5	Bacteria	Omnitrophicaeota	uncultured bacterium	uncultured bacterium	uncultured bacterium	uncultured bacterium	uncultured bacterium	B14706_uncultured bacterium	Copiotroph	0	0	0	0	0	0	0	0	0	0	0	0	1.12721e-05	0	1.69094e-05	0	0	0	0	0	0	0	0	0	0	0	0	2.5557e-05
c69566b1f7793cfdc65fa242af8f9809	Bacteria	Chloroflexi	Dehalococcoidia	GIF9	uncultured soil bacterium	uncultured soil bacterium	uncultured soil bacterium	B13777_uncultured soil bacterium	Copiotroph	0	0	0	0	0	0	0	0	0	0	0	0	4.28338e-05	0	2.5364e-05	0	0	0	0	0	0	0	0	0	0	0	0	0
c6deeef954048ad6ab3d566e2c1e3925	Bacteria	Kiritimatiellaeota	Kiritimatiellae	WCHB1-41	#N/A	#N/A	#N/A	B8671_o_WCHB1-41	Copiotroph	0	0	0	0	0	0	0	0	1.87019e-05	0	9.50433e-05	0	0	0	0	6.13855e-05	0	0	0	0	0	0	0	0	0	0	0	0
c6ffd435646654876c422ad82f5835ca	Bacteria	Chloroflexi	Anaerolineae	Anaerolineales	Anaerolineaceae	uncultured	uncultured Chloroflexi bacterium	B2085_uncultured	Copiotroph	0	0	0	0	0	0	0	0	0.000481573	0	0	0	0	0	0	0	0	0	0	0	0	0	0.000751876	0.000225135	0	0	0	0.000202326
c713299c81eeedee83242407f6ee781f	Bacteria	Proteobacteria	Deltaproteobacteria	#N/A	#N/A	#N/A	#N/A	B20426_o_NA	Copiotroph	0	0	0	0	0	0	0	0	4.67546e-06	0	7.12824e-06	0	0	0	0	0	0	0	0	0	0	0	0	0	0	0	0	0
c72d078a3e14f878825b86700ef0fc16	Bacteria	Chloroflexi	Anaerolineae	RBG-13-54-9	uncultured prokaryote	uncultured prokaryote	uncultured prokaryote	B1684_uncultured prokaryote	Copiotroph	6.53615e-05	0	0	0	0	0	0	0	0	0.00113253	0.000125932	0.000174413	0	0	0	0	0	0	0.000400367	0	0	0	0	0	0	0	0	0
c75c0bdd13f161c897007a2dd81d3249	Bacteria	Chloroflexi	Anaerolineae	SBR1031	uncultured bacterium	uncultured bacterium	uncultured bacterium	B1119_uncultured bacterium	Copiotroph	0.000261446	0.000357071	8.56134e-05	0.000135914	5.73059e-05	0	0.000214528	0	8.64961e-05	0.000219091	0.000218599	0.000509822	0.000432847	0.00014444	0.000250822	8.05684e-05	0	0	4.39709e-05	3.56563e-05	0.00013498	0.000350046	0	7.66764e-05	0	0	0.0001692	1.06487e-05
c865a21a92b1bf5c593b1516fa2799c7	Bacteria	Chloroflexi	Anaerolineae	RBG-13-54-9	#N/A	#N/A	#N/A	B4110_o_RBG-13-54-9	Copiotroph	0	0	0	0	0	2.37464e-05	1.97015e-05	6.60157e-05	0	0	0	0	7.66499e-05	0.000219403	6.48192e-05	5.75489e-05	0	0	1.85141e-05	3.35589e-05	0	0	0	0	0	0	0	0
c88df10f7b9705b136c1d56265198e43	Bacteria	Acidobacteria	c5LKS83	uncultured bacterium	uncultured bacterium	uncultured bacterium	uncultured bacterium	B2712_uncultured bacterium	Copiotroph	0	0	0	0	6.20814e-05	0	0	0	0.000236111	9.77481e-05	1.66326e-05	4.52803e-05	5.63603e-05	0	0.000109911	0.000209094	0	4.55409e-05	0	0	7.38571e-05	0.000157864	1.30761e-05	0	0	0	0	5.75032e-05
c8ca2ebb6f5a6fa056d02702b69363ca	Bacteria	Planctomycetes	Phycisphaerae	Tepidisphaerales	WD2101 soil group	#N/A	#N/A	B6825_f_WD2101 soil group	Copiotroph	0	0	3.27345e-05	1.69893e-05	0	0	0	0	0	0	0	0	0.000121738	0	4.50916e-05	0	0	4.55409e-06	1.38855e-05	3.77537e-05	0	0	0	0	1.09032e-05	0	0	0
cad2f9477698a8fece88f30bc16a8341	Bacteria	Proteobacteria	Deltaproteobacteria	Myxococcales	Haliangiaceae	Haliangium	#N/A	B10722_Haliangium	Copiotroph	3.96837e-05	0	0	0	0	0	0	0	0	0	0	0	7.89044e-05	0	0	0	0	0	0	0	0	0	0	0	0	0	0	0
cbb32b374f87c8643534672f93aea822	Bacteria	Patescibacteria	Berkelbacteria	#N/A	#N/A	#N/A	#N/A	B17603_o_NA	Copiotroph	0	0	0	0	0	0	0	0	0	0	7.12824e-06	1.50934e-05	0	0	0	0	0	0	0	0	0	0	0	0	0	0	0	0
cc83ca5f2d4a6425c7ef176021f493c3	Bacteria	Bacteroidetes	Bacteroidia	Sphingobacteriales	#N/A	#N/A	#N/A	B3014_o_Sphingobacteriales	Copiotroph	0	8.92677e-05	6.54691e-05	0	0	8.95057e-05	0	0	0	0	0.000171078	9.22376e-05	8.11588e-05	0	4.79099e-05	0.000115098	0	0.000107021	3.23996e-05	0	0	0	0	0	0	4.24162e-05	0	2.98165e-05
cd562eac488ab90c7fbae9102f3aa35c	Bacteria	Chloroflexi	Anaerolineae	Anaerolineales	Anaerolineaceae	uncultured	#N/A	B282_uncultured	Copiotroph	0	0	0	0	0.0012082	0.00093159	0	0	0.00282866	0.00273526	0.00481869	0.00273526	0	0	0	0.00109535	0.00145041	0	0.000916446	0.00100257	0	0	0	0	0	0	0	0.000181029
ce8b9981cb0380cac89b2ea3e2c5468c	Bacteria	Patescibacteria	Microgenomatia	Candidatus Woesebacteria	Candidatus Woesebacteria bacterium GW2011_GWA2_40_7b	Candidatus Woesebacteria bacterium GW2011_GWA2_40_7b	Candidatus Woesebacteria bacterium GW2011_GWA2_40_7b	B17268_Candidatus Woesebacteria bacterium GW2011_GWA2_40_7b	Copiotroph	0	0	0	0	0	0	0	0	0	0	0	1.34164e-05	0	0	0	0	0	0	0	0	0	0	1.08968e-05	0	0	0	0	0
ced8fcc7d2fb267c3a5c65a15f116e7a	Bacteria	Proteobacteria	Gammaproteobacteria	#N/A	#N/A	#N/A	#N/A	B11416_o_NA	Copiotroph	0	0	5.03608e-06	0	7.16324e-06	0	6.56718e-06	0	1.40264e-05	3.37062e-06	0	0	1.12721e-05	0	0	0	0	0	3.47139e-05	0	0	4.57577e-06	8.71741e-06	0	0	0	0	6.38925e-06
cfa1077eefe1256ea0e7aee833b69f20	Bacteria	Chloroflexi	Chloroflexia	Chloroflexales	Roseiflexaceae	uncultured	uncultured Chloroflexi bacterium	B9942_uncultured	Copiotroph	0	0	0	0	0	0	0	0	0	0	0	0	5.18514e-05	4.38806e-05	3.94552e-05	0	0	0	0	0	0	0	0	0	0	0	0	0
cfb6fde7f76a512c43953b9dce641de2	Bacteria	Proteobacteria	Deltaproteobacteria	Myxococcales	mle1-27	#N/A	#N/A	B2190_f_mle1-27	Copiotroph	0	0.000190179	5.28789e-05	0	4.77549e-05	0	0	0	3.5066e-05	0.00021572	0.000102172	4.36032e-05	5.63603e-05	0	0.000214185	8.82416e-05	5.37954e-05	0	5.55422e-05	0.000262179	3.31084e-05	0	1.08968e-05	0	0	0	0.000114265	0
cfdc53b4b06ddc7a359c0f49fa50ffe6	Bacteria	Planctomycetes	Planctomycetacia	Isosphaerales	Isosphaeraceae	#N/A	#N/A	B3428_f_Isosphaeraceae	Copiotroph	0	0	0	0	0	0	6.56718e-06	0	0	0	0	1.67705e-05	0.000211915	0.000239515	0.000140911	9.59148e-05	0	0	0	0	0	0	0	0	0	6.10793e-05	0	0
cfe59e44e505b7b7984447f18174a01f	Bacteria	Chloroflexi	Anaerolineae	ADurb.Bin180	uncultured bacterium SJA-68	uncultured bacterium SJA-68	uncultured bacterium SJA-68	B12947_uncultured bacterium SJA-68	Copiotroph	0	0	0	0	0	0	0	0	0	0	1.42565e-05	0	3.60706e-05	0	3.10005e-05	0	0	0	0	0	0	0	0	0	0	0	0	0
CP003659.1320695.1322171	Bacteria	Cyanobacteria	Oxyphotobacteria	Nostocales	Nostocaceae	#N/A	#N/A	B10895_f_Nostocaceae	Copiotroph	0	0	0	0	0	0	0	0	0	0	0	0	7.66499e-05	0	4.50916e-05	0	0	0	0	0	0	0	0	0	0	0	0	0
CU921546.1.1351	Bacteria	Proteobacteria	Gammaproteobacteria	Steroidobacterales	Steroidobacteraceae	uncultured	uncultured prokaryote	B1075_uncultured	Copiotroph	0	0	0	0	0.000998078	0.00028861	0	0	0	0	0	0	0.00156907	0.000484515	0.000267732	0.000659894	0	0	0	0	0	0	0	0	0	0	0	0
CU922363.1.1299	Bacteria	Proteobacteria	Alphaproteobacteria	Rhizobiales	Hyphomicrobiaceae	Hyphomicrobium	#N/A	B6110_Hyphomicrobium	Copiotroph	0	0	0	0	0	0	0	0	0.000172992	0	0.000178206	0	0	0	0	0	0	0	0	0	0	0	0	0	0	0	0	0
d01a75e44d668712298ccb9201230718	Bacteria	Chloroflexi	Chloroflexia	Chloroflexales	Roseiflexaceae	Kouleothrix	uncultured bacterium	B14325_Kouleothrix	Copiotroph	0	0	0	0	0	0	0	0	0	0	0	6.70819e-06	3.60706e-05	0	0	0	0	0	0	0	0	6.86365e-06	4.3587e-06	0	0	0	0	0
d01ff5cd992617a02790f56ff24f5664	Bacteria	Patescibacteria	Microgenomatia	Candidatus Woesebacteria	#N/A	#N/A	#N/A	B13783_o_Candidatus Woesebacteria	Copiotroph	0	0	0	0	0	0	0	0	0	0	0	0	0	0	0	1.15098e-05	0	0	0	0	0	0	4.79457e-05	0	0	0	0	0
d0d89b1a2df95aae54ca47d76e4971d3	Bacteria	Spirochaetes	Spirochaetia	Spirochaetales	Spirochaetaceae	Spirochaeta 2	#N/A	B4584_Spirochaeta 2	Copiotroph	7.00301e-06	3.10496e-05	0	3.02032e-05	0	0	0	0	0	0	0	0	2.47985e-05	6.39925e-05	7.89104e-05	0.00018032	0	0	0	0	1.52808e-05	6.63487e-05	0	0	0	0	0	0
d156555dcf69122447846b6b0896d602	Bacteria	Chloroflexi	Anaerolineae	Anaerolineales	Anaerolineaceae	uncultured	#N/A	B442_uncultured	Copiotroph	0	0.00028915	0	0	0	0.000248424	0.000142289	0.000351374	0.00170888	0.00253808	0.00157297	0.00107666	0.000157809	0	0.000177548	9.78331e-05	0	0.00030057	0.000615593	0.000186671	0	0.000148712	0	0.000701507	0	0	0.000230727	0.00128211
d3bc4cc6f4d9b0d884bf93db9d792ec0	Bacteria	Gemmatimonadetes	Gemmatimonadetes	Gemmatimonadales	Gemmatimonadaceae	Gemmatimonas	#N/A	B261_Gemmatimonas	Copiotroph	0	0	0	0	0	0	0	0	0.000472222	0.000166846	0.000185334	0.000318639	0.0030908	0.00377007	0.00131329	0.00219453	0	0.000487287	0.000775276	0.00310839	0.00184388	0.0042875	3.7049e-05	0	0	0	0.00105695	0
d3dc709ddaa31580eb9c9da20d19bbed	Bacteria	Patescibacteria	Gracilibacteria	Candidatus Peregrinibacteria	uncultured bacterium	uncultured bacterium	uncultured bacterium	B6517_uncultured bacterium	Copiotroph	0	0	0	0	0	0	2.84578e-05	0	4.20792e-05	0	8.31628e-05	0	0	1.46269e-05	3.6637e-05	4.60391e-05	2.06905e-05	0	0	0	0	2.97425e-05	0	0	0	0	0	0
d3e971a8338952d3ec59b73823d5b71b	Bacteria	#N/A	#N/A	#N/A	#N/A	#N/A	#N/A	B972_o_NA	Copiotroph	0	0	0	8.68341e-05	0	0.000180838	8.75624e-05	0	0.000493261	0.000224146	0.000855389	0.000712745	0	0.000138955	0	0	0	0.000216319	0.000196712	0.000209743	9.67783e-05	0.000480456	0	0.000145196	0.000246412	0.000110282	0	0.000110747
d3f87bae5192ac76f85b1d483c3a9b23	Bacteria	BRC1	uncultured soil bacterium PRR-11	uncultured soil bacterium PRR-11	uncultured soil bacterium PRR-11	uncultured soil bacterium PRR-11	uncultured soil bacterium PRR-11	B12402_uncultured soil bacterium PRR-11	Copiotroph	2.33434e-05	0	0	0	0	0	0	0	4.20792e-05	0	0	0	0	0	0	0	0	0	0	0	0	0	1.96142e-05	0	0	0	0	0
d43531b678ee3215e87006e0436c5740	Bacteria	Planctomycetes	Phycisphaerae	Tepidisphaerales	WD2101 soil group	#N/A	#N/A	B6383_f_WD2101 soil group	Copiotroph	0	0	0	0	0	0	0	0	5.61056e-05	0	0	0.00019286	0	0	0	0	0	0	0	0	0	0	0	0	0	0	0	0
d460677d2fb36bcdfbeb700b47667b8b	Bacteria	Latescibacteria	uncultured soil bacterium PBS-II-5	uncultured soil bacterium PBS-II-5	uncultured soil bacterium PBS-II-5	uncultured soil bacterium PBS-II-5	uncultured soil bacterium PBS-II-5	B7104_uncultured soil bacterium PBS-II-5	Copiotroph	1.86747e-05	0	3.52526e-05	0	0	0	0	0	2.57151e-05	0	3.56412e-05	0	4.50882e-05	0	3.6637e-05	0	0	1.36623e-05	0	0	3.05616e-05	3.66062e-05	0	0	0	0	0	0
d5733b5ea2f77cd3dd85935d26b341ee	Bacteria	Bacteroidetes	Ignavibacteria	SJA-28	#N/A	#N/A	#N/A	B17614_o_SJA-28	Copiotroph	0	0	0	0	0	0	0	0	1.63641e-05	0	0	8.38524e-06	0	0	0	0	0	0	0	0	0	0	0	0	0	0	0	0
d6366aa589ef82546dcae1236cd7e828	Bacteria	Proteobacteria	Gammaproteobacteria	#N/A	#N/A	#N/A	#N/A	B15148_o_NA	Copiotroph	0	0	0	0	0	0	0	0	0	0	1.42565e-05	0	0	0	2.25458e-05	0	0	0	1.61998e-05	0	0	0	0	0	0	0	0	0
d689b0ea51ef110b5ed60227e416837e	Bacteria	Patescibacteria	ABY1	Candidatus Magasanikbacteria	uncultured bacterium	uncultured bacterium	uncultured bacterium	B9563_uncultured bacterium	Copiotroph	0	0	0	0	0	0	0	0	0	0	0	0	5.41058e-05	3.65671e-05	1.69094e-05	0	0	0	0	0	0	2.51667e-05	0	0	0	0	1.0987e-05	0
d77f74fa679605d0630a62f87bc3eb82	Bacteria	Firmicutes	Negativicutes	Selenomonadales	Veillonellaceae	Sporomusa	#N/A	B2970_Sporomusa	Copiotroph	0	0	0.000214034	0.000103823	0	0	0	0	0.000217409	9.26922e-05	9.97954e-05	0	0	0	8.45468e-05	0	0	0.000104744	2.08283e-05	7.13126e-05	0	0	0	0	0	0	0	4.68545e-05
d89ad56f1cdee32482f23fcf8e8a1f7c	Bacteria	Verrucomicrobia	Verrucomicrobiae	Chthoniobacterales	Chthoniobacteraceae	Candidatus Udaeobacter	#N/A	B7835_Candidatus Udaeobacter	Copiotroph	0	0	0	0	0	0	0	0	1.87019e-05	2.35944e-05	9.50433e-05	0	0	0	2.25458e-05	0	1.44834e-05	0	2.08283e-05	0	0	0	0	0	0	1.18765e-05	0	8.51899e-06
d947b5f4c61ab52b1175e6ccefe5c183	Bacteria	Chloroflexi	Anaerolineae	Anaerolineales	Anaerolineaceae	uncultured	#N/A	B366_uncultured	Copiotroph	0	0	0	0	0.000126551	0	0.000124776	0	0.0011151	0.000952201	0.00115002	0.000632247	0.000297582	0.000369328	0.00146548	0.00165741	1.65524e-05	0.000494118	0.00307796	0.00222328	0.00033363	0.000318016	0.000871741	0	8.28643e-05	0	0.000175792	0.000298165
d96ad368fd3288ab16706af9b149c254	Bacteria	Proteobacteria	Alphaproteobacteria	#N/A	#N/A	#N/A	#N/A	B222_o_NA	Copiotroph	0	0	0	0	5.49182e-05	6.94126e-05	4.15921e-05	3.40726e-05	0.000385726	0.000409531	0.000458584	0.000241495	0.00165474	0.00236041	0.00109065	0.000905436	4.96573e-05	5.0095e-05	0.00650306	0.0064433	0.00251114	0.00227873	4.57664e-05	5.05738e-05	0.00013738	0.000205294	0	0
d9d91ce4716821d826734240fcd0c77e	Bacteria	Proteobacteria	Gammaproteobacteria	Gammaproteobacteria Incertae Sedis	Unknown Family	uncultured bacterium	uncultured bacterium	B3539_uncultured bacterium	Copiotroph	7.23645e-05	0	6.2951e-05	0	0	0	0	0	0.000156628	0	0	4.36032e-05	0	0	0	0	0	0	7.40562e-05	7.341e-05	0	7.55002e-05	0.000165631	0	0	0	0	7.02817e-05
d9de79c0b7899e540dd46730eb777405	Bacteria	Proteobacteria	Deltaproteobacteria	#N/A	#N/A	#N/A	#N/A	B11299_o_NA	Copiotroph	0	0	0	0	0	1.46132e-05	0	0	0	0	0	0	6.31235e-05	1.82836e-05	0	0	0	0	0	0	0	0	0	0	0	0	0	0
dae369d35d33b6e23c792f46882d78e7	Bacteria	Planctomycetes	#N/A	#N/A	#N/A	#N/A	#N/A	B9716_o_NA	Copiotroph	0	0	1.76263e-05	0	0	0	0	0	0	0	2.37608e-05	0	7.89044e-05	0	0	0	0	1.36623e-05	0	0	0	1.37273e-05	0	0	0	0	0	0
db05c9a087a158a0739041c6d24fdd9b	Bacteria	Chloroflexi	Anaerolineae	Anaerolineales	Anaerolineaceae	uncultured	#N/A	B33_uncultured	Copiotroph	0.00120452	0	0.000443175	0	0.00247609	0.0019947	0.00487942	0.00393326	0.00652929	0.00412564	0.00558379	0.0035654	0.0029668	0.00133287	0.00362424	0.00247652	0.00255735	0.001389	0.00463083	0.00357402	0.00313001	0.0040404	0.004496	0.00306216	0.00247721	0.00202749	0.00185241	0.00496444
db61127c0e58d434ee4b9f1b243eadf0	Bacteria	BRC1	uncultured soil bacterium PBS-III-18	uncultured soil bacterium PBS-III-18	uncultured soil bacterium PBS-III-18	uncultured soil bacterium PBS-III-18	uncultured soil bacterium PBS-III-18	B14332_uncultured soil bacterium PBS-III-18	Copiotroph	0	0	0	0	0	0	0	0	0	0	0	0	3.8325e-05	0	1.12729e-05	0	0	0	0	0	0	0	8.71741e-06	0	0	0	0	0
ddca0af2a330ae1fb15f95c118438462	Bacteria	Planctomycetes	Planctomycetacia	Isosphaerales	Isosphaeraceae	uncultured	uncultured Isosphaera sp.	B10042_uncultured	Copiotroph	0	0	0	0	0	0	0	0	0	0	4.03934e-05	0	9.24308e-05	0	0	0	0	0	0	0	0	4.57577e-06	0	0	0	0	0	0
de3e1254233574fd88e300f2b64853c7	Bacteria	Chloroflexi	Anaerolineae	SBR1031	anaerobic bacterium MO-CFX2	anaerobic bacterium MO-CFX2	anaerobic bacterium MO-CFX2	B1048_anaerobic bacterium MO-CFX2	Copiotroph	0	0	0	0	0.000174305	0	0	0	0.000395077	0	0	0.000555103	0	0	0	0	0.000254493	0	0	0	0.000226665	0.000178455	0.000836871	0.000283866	0	0	0	0.00129915
de51bbf369ba6463dd1277665f55184b	Bacteria	Omnitrophicaeota	#N/A	#N/A	#N/A	#N/A	#N/A	B8965_o_NA	Copiotroph	0	0	0	0	0	0	0	0	0.00010286	0	4.27695e-05	0	0	0	0	0	0	0	0	0	0	2.97425e-05	0	0	0	0	0	0
df4e0ef006080df218d8fc11fcddd6dd	Bacteria	Planctomycetes	Phycisphaerae	Phycisphaerales	Phycisphaeraceae	SM1A02	#N/A	B6273_SM1A02	Copiotroph	3.26807e-05	0	0	0	0	0	0	0	0	8.59509e-05	0	3.3541e-05	1.35265e-05	0	5.35463e-05	3.06927e-05	0	3.87097e-05	0	0	0	0	0	0	0	0	0	0
DQ066440.1.1292	Bacteria	Proteobacteria	Alphaproteobacteria	Sphingomonadales	Sphingomonadaceae	Sphingopyxis	#N/A	B9027_Sphingopyxis	Copiotroph	0	0	0	0	0	0	0	0	3.74037e-05	0	0.0001093	0	0	0	0	0	0	0	0	0	0	0	0	0	0	0	0	2.5557e-05
DQ067010.1.1423	Bacteria	Rokubacteria	NC10	Rokubacteriales	uncultured soil bacterium	uncultured soil bacterium	uncultured soil bacterium	B1016_uncultured soil bacterium	Copiotroph	0.00056491	0.000145545	7.55413e-05	0.00048325	0.000138489	0.000555301	0	0	0.000119224	2.52797e-05	0.000308891	0.00103474	0	0	0	0	0	0.00040076	0.000215226	0	0	0	0.000119864	0	0	0	0	0
DQ067030.1.1417	Bacteria	Proteobacteria	Deltaproteobacteria	Myxococcales	bacteriap25	#N/A	#N/A	B2898_f_bacteriap25	Copiotroph	0	0	0	0	0	0	0	0	0	0	0	0.000826784	0	0	0	0	0	0	0	0	0	0	0	0	0	0	0	0
DQ067034.1.1406	Bacteria	Proteobacteria	Deltaproteobacteria	Myxococcales	Blfdi19	Anaeromyxobacter dehalogenans	Anaeromyxobacter dehalogenans	B3047_Anaeromyxobacter dehalogenans	Copiotroph	7.46988e-05	0	0.000113312	0	0	0	1.97015e-05	0	9.35093e-05	0.000166846	4.03934e-05	7.2113e-05	4.50882e-05	2.19403e-05	5.35463e-05	0	0	4.09868e-05	0	0.000111164	0	1.37273e-05	0	0	0	3.39329e-05	4.39479e-05	0
DQ083114.1.1529	Bacteria	Proteobacteria	Deltaproteobacteria	MBNT15	uncultured Syntrophaceae bacterium	uncultured Syntrophaceae bacterium	uncultured Syntrophaceae bacterium	B532_uncultured Syntrophaceae bacterium	Copiotroph	0	0	0	0	0	0	0	0	0.00115016	0	0.000681935	0.00447939	0	0	0	0	0.00234631	0	0	0	0.000736024	0	0	0	0	0	0	0
DQ083119.1.1512	Bacteria	Acidobacteria	Subgroup 6	unidentified	unidentified	unidentified	unidentified	B701_unidentified	Copiotroph	0.000259112	0	0.000105758	0.000192545	0.000666181	0.000496848	0	0	0.000860285	0.00067581	0.000762722	0.00134667	9.69396e-05	0	3.6637e-05	3.83659e-05	0.000333117	0.000352942	0.000354081	0.000144723	0.000267414	4.57577e-05	7.4098e-05	0	0	0	0	0
DQ125814.1.1484	Bacteria	Verrucomicrobia	Verrucomicrobiae	Opitutales	Opitutaceae	Opitutus	#N/A	B7892_Opitutus	Copiotroph	0	0	0	0	0	0	0	0	0	0	0.000125932	0	0	0	0	0	0	0	0	0	0	0	9.37121e-05	0	0	0	0	0
DQ129211.1.1373	Bacteria	Chloroflexi	Ktedonobacteria	Ktedonobacterales	JG30-KF-AS9	uncultured soil bacterium	uncultured soil bacterium	B1615_uncultured soil bacterium	Copiotroph	0	0	0	0	0	0	0	0	0	0	0	0	0.000777772	0.00103302	0	0	0	0	2.77711e-05	8.80921e-05	0	0	1.74348e-05	0	0	0	0.000268082	2.12975e-05
DQ138960.1.1519	Bacteria	Nitrospirae	4-29-1	#N/A	#N/A	#N/A	#N/A	B357_o_NA	Copiotroph	0	0	0	0	0.000143265	0.000370809	0.000216717	0.000313042	0.0002478	0	0	0.000149257	0.00530463	0.00261638	0.00294223	0.002747	0	0.000321063	0	0.000639716	0	0	0	0	0	0	0	0
DQ138961.1.1482	Bacteria	Nitrospirae	Thermodesulfovibrionia	uncultured	uncultured prokaryote	uncultured prokaryote	uncultured prokaryote	B305_uncultured prokaryote	Copiotroph	0	0	0	0	0.000346223	0	0.000901893	0	0.000327283	0	0.000850637	0	0.00348306	0.000713059	0.00320432	0.000389414	0	0.000783303	0.00140244	0.00126056	0.000883739	0.00269055	0	0	0.00141524	0	0.000224134	0.00109682
DQ298014.1.1379	Bacteria	Patescibacteria	Microgenomatia	uncultured soil bacterium	uncultured soil bacterium	uncultured soil bacterium	uncultured soil bacterium	B16990_uncultured soil bacterium	Copiotroph	0	0	0	0	0	0	0	0	0	0	1.66326e-05	1.17393e-05	0	0	0	0	0	0	0	0	0	0	0	0	0	0	0	0
DQ404689.1.1545	Bacteria	Verrucomicrobia	Verrucomicrobiae	Chthoniobacterales	Chthoniobacteraceae	Candidatus Udaeobacter	uncultured soil bacterium	B861_Candidatus Udaeobacter	Copiotroph	0	0.000293031	0.000546415	0.000334122	0	0	0	0	0.000820544	0.00048874	0	0.000578581	0.000408048	0.000109701	0	0.00036064	0	0	0	0	0.000674901	0.000617729	0	0	0	0	0.000287859	0
DQ404787.1.1467	Bacteria	Chloroflexi	Dehalococcoidia	661239	uncultured bacterium	uncultured bacterium	uncultured bacterium	B840_uncultured bacterium	Copiotroph	0	4.65744e-05	4.78428e-05	0.00018877	4.77549e-05	0.000133345	0.000166369	0.000308783	0.000320269	0.000225832	0.000166326	0.000504791	0.000464408	0.000318134	0.000186003	0.000393251	5.37954e-05	5.0095e-05	9.48846e-05	9.43843e-05	8.91379e-05	0.000228788	0.000122044	0.000340965	0.000233328	0.000532747	3.73557e-05	8.51899e-06
DQ450751.1.1387	Bacteria	Bacteroidetes	Bacteroidia	Chitinophagales	Chitinophagaceae	uncultured	uncultured Ferruginibacter sp.	B294_uncultured	Copiotroph	0	0.000298853	0.00069498	0.000307695	0.000957486	0.000622887	0.000444379	0.000479146	0.00231669	0.00308749	0.000729457	0.00104983	0.000148791	0.0010184	0.000264913	0.000481492	0	0.000439469	0.00113861	0.00074249	0.000356552	0.000244804	0.000869561	0.00159389	0	0	9.88828e-05	0
DQ450774.1.1396	Bacteria	Proteobacteria	Gammaproteobacteria	Betaproteobacteriales	Gallionellaceae	Sideroxydans	#N/A	B268_Sideroxydans	Copiotroph	0	0	0	0	0	0.000818338	0	0	0	0.0029948	0	0.0012494	0	0.00289063	0	0.0040783	0	0	0	0	0	0.00177311	0.00120736	0.00159715	0.000861353	0.000800817	0.000936091	0
DQ450806.1.1322	Bacteria	Nitrospirae	Thermodesulfovibrionia	uncultured	uncultured prokaryote	uncultured prokaryote	uncultured prokaryote	B48_uncultured prokaryote	Copiotroph	0	0	0	0	0	0.00125125	0.00115582	0.00104773	0	0.000360657	0.000306515	0.00234619	0.0109091	0.0182379	0.00730766	0.010048	0	0	0.00143484	0.0024498	0.00137018	0.0025876	0	0.00148132	0.00107942	0.00599595	0.000375755	0.000513269
DQ450820.1.1393	Bacteria	Acidobacteria	Holophagae	Subgroup 7	uncultured candidate division OS-K bacterium	uncultured candidate division OS-K bacterium	uncultured candidate division OS-K bacterium	B1448_uncultured candidate division OS-K bacterium	Copiotroph	0	0	0	0.000371876	0	0	0	0	0.000261826	0.000471887	0.000401558	0.000654049	0	0	0	0	0	0	0.000330939	0	0	0	0	0	0	0	0	0
DQ836757.1.1415	Bacteria	Proteobacteria	Gammaproteobacteria	Betaproteobacteriales	Hydrogenophilaceae	Thiobacillus	#N/A	B15_Thiobacillus	Copiotroph	0	0	0.000133456	0	0.00373205	0.00390172	0.00519902	0.00379484	0.0085187	0.00539805	0.00407973	0.00232774	0.00168404	0.0014444	0.00904933	0.00522544	0.00846656	0.00160076	0.00711634	0.00557287	0.00705718	0.0038894	0.0136122	0.0123237	0.00913688	0.00426537	0	0.00886401
DQ988313.1.1300	Bacteria	Proteobacteria	Gammaproteobacteria	Betaproteobacteriales	#N/A	#N/A	#N/A	B2092_o_Betaproteobacteriales	Copiotroph	0	0	0	0	0	0	0	0	0	0	0	0	0.000412557	0.000418694	0.00104274	0	0	0	0	0	0	0	0	0	0	0	0	0
e0085b7f72f1073dde092776fedf9fbe	Bacteria	Proteobacteria	Deltaproteobacteria	Oligoflexales	0319-6G20	#N/A	#N/A	B4203_f_0319-6G20	Copiotroph	0	0	0	7.55079e-05	0	0	0	0	2.33773e-05	0	0	0.000201246	0	0	0.000160639	0	0	2.50475e-05	0	3.98512e-05	0	0	0	2.7734e-05	0	0	0	0
e2428da50fc02ac90039ba0d149a9972	Bacteria	Planctomycetes	Phycisphaerae	Pla1 lineage	uncultured bacterium	uncultured bacterium	uncultured bacterium	B4184_uncultured bacterium	Copiotroph	2.56777e-05	0	0	0	0	0	0	0	0	0	8.31628e-05	0.000223047	0	0	1.40911e-05	0	0	4.55409e-05	0	0	7.38571e-05	4.80456e-05	0	0	0	0	0	4.68545e-05
e248174f669ad33b69cf26ab1b859bc0	Bacteria	Chloroflexi	Anaerolineae	SBR1031	metagenome	metagenome	metagenome	B9720_metagenome	Copiotroph	0	0	0	0	0	0	0	0	8.41584e-05	4.71887e-05	0	0	0	0	0	0	0	0	0	0	0	0	0	0	0	0	0	0
e2b9edf1790665fa7370360995dab748	Bacteria	Fibrobacteres	Chitinivibrionia	uncultured	uncultured bacterium	uncultured bacterium	uncultured bacterium	B4808_uncultured bacterium	Copiotroph	0	0	0	0	0	0	0	0	6.77942e-05	0	4.75216e-05	0.00019286	0	0	0	0	0	0	0	0	0.000142621	0	0	0	0	0	0	0
e2fb62561ae7819c6f43399c7cffc052	Bacteria	Kiritimatiellaeota	Kiritimatiellae	WCHB1-41	uncultured Chlorobi bacterium	uncultured Chlorobi bacterium	uncultured Chlorobi bacterium	B8855_uncultured Chlorobi bacterium	Copiotroph	0	0	0	0	0	0	4.37812e-06	0	0	0	0	0	4.73426e-05	9.87313e-05	0	0	0	0	0	0	0	0	0	0	0	0	0	0
e2fd46c2a1ad838a5702977a5198a3e8	Bacteria	Patescibacteria	CPR2	uncultured Clostridium sp.	uncultured Clostridium sp.	uncultured Clostridium sp.	uncultured Clostridium sp.	B15892_uncultured Clostridium sp.	Copiotroph	0	0	0	0	0	0	0	0	1.16887e-05	0	3.08891e-05	0	0	0	0	0	0	0	0	0	0	0	0	0	0	0	0	0
e2ff30942db72f87597965d6a221a098	Bacteria	Patescibacteria	Microgenomatia	Candidatus Amesbacteria	#N/A	#N/A	#N/A	B17289_o_Candidatus Amesbacteria	Copiotroph	0	0	0	0	0	0	0	0	0	0	0	0	1.35265e-05	0	1.97276e-05	0	0	0	0	0	0	0	0	0	0	0	0	0
e31983895c9381a08d749b1387540062	Bacteria	Bacteroidetes	Ignavibacteria	Kryptoniales	BSV26	Ignavibacteria bacterium RIFCSPLOWO2_12_FULL_56_21	Ignavibacteria bacterium RIFCSPLOWO2_12_FULL_56_21	B3732_Ignavibacteria bacterium RIFCSPLOWO2_12_FULL_56_21	Copiotroph	7.93675e-05	6.20993e-05	0	0	0	0	0	0	0	0	6.17781e-05	4.69573e-05	5.63603e-05	6.94776e-05	6.76375e-05	0	0	0	0.00020134	4.19486e-05	0	0	3.48696e-05	0	0	0	0	0
e46799f53fcf832fb2ca36289b6a63e7	Bacteria	Patescibacteria	Microgenomatia	Candidatus Roizmanbacteria	Candidatus Roizmanbacteria bacterium RIFCSPLOWO2_01_FULL_40_32	Candidatus Roizmanbacteria bacterium RIFCSPLOWO2_01_FULL_40_32	Candidatus Roizmanbacteria bacterium RIFCSPLOWO2_01_FULL_40_32	B19507_Candidatus Roizmanbacteria bacterium RIFCSPLOWO2_01_FULL_40_32	Copiotroph	0	0	0	0	0	0	0	0	0	0	0	0	1.57809e-05	0	0	0	0	0	0	0	0	0	0	0	0	0	0	0
e5ad44a007019b0e1a82d3ec923b91c8	Bacteria	Planctomycetes	#N/A	#N/A	#N/A	#N/A	#N/A	B10569_o_NA	Copiotroph	1.4006e-05	0	0	0	0	0	0	0	1.16887e-05	0	3.56412e-05	0	4.73426e-05	0	0	0	0	1.59393e-05	0	0	0	0	0	0	0	0	0	0
e5b4a12e0e709723734d7c2f4e62d3a6	Bacteria	Patescibacteria	Gracilibacteria	Candidatus Peregrinibacteria	uncultured bacterium	uncultured bacterium	uncultured bacterium	B14530_uncultured bacterium	Copiotroph	0	0	0	0	0	0	0	0	0	0	0	0	5.41058e-05	0	0	0	0	0	0	0	0	0	0	0	0	0	0	0
e605f74859af4a46e53d54bf5553fc11	Bacteria	Chloroflexi	Anaerolineae	Anaerolineales	Anaerolineaceae	Anaerolinea	uncultured Chloroflexi bacterium	B2689_Anaerolinea	Copiotroph	0	0	0	0	0	0	0	0	0	0	0.00113577	0	4.9597e-05	0	0	0	0	0	0	0.000100677	0	0	0	0	0	0	0	0
e6102a121d978b88a088218e2bad194d	Bacteria	#N/A	#N/A	#N/A	#N/A	#N/A	#N/A	B17637_o_NA	Copiotroph	0	0	0	0	0	0	0	0	7.0132e-06	0	0	0	4.50882e-06	0	8.45468e-06	0	0	9.10817e-06	0	0	0	0	0	0	0	0	0	0
e6b16129247cef109051d11977529f65	Bacteria	Patescibacteria	CPR2	uncultured bacterium	uncultured bacterium	uncultured bacterium	uncultured bacterium	B11424_uncultured bacterium	Copiotroph	0	0	0	0	0	0	0	0	0	0	0	0	3.15617e-05	3.29104e-05	0	0	0	0	3.00853e-05	0	0	0	0	0	0	0	0	0
e75fd8be58d1d4089a5488a054170051	Bacteria	Verrucomicrobia	Verrucomicrobiae	Pedosphaerales	Pedosphaeraceae	uncultured prokaryote	uncultured prokaryote	B3355_uncultured prokaryote	Copiotroph	0	0	0	0	0	2.37464e-05	0	0	0	1.85384e-05	0.000166326	6.37278e-05	8.11588e-05	9.69029e-05	0	3.64476e-05	0	0	3.70281e-05	9.43843e-05	0	2.28788e-05	0	0	9.81288e-05	2.3753e-05	0	3.62057e-05
e7a428935e8685fc48436887e93d6ef2	Bacteria	Armatimonadetes	uncultured	uncultured bacterium	uncultured bacterium	uncultured bacterium	uncultured bacterium	B9173_uncultured bacterium	Copiotroph	0	0	0	0	0	0	0	0	0	2.02237e-05	0	0.000100623	0	0	0	0	0	0	0	0	0	0	0	0	0	0	0	0
e962077e8329c69bac2101a6c97b3405	Bacteria	Chloroflexi	Dehalococcoidia	Dehalococcoidales	uncultured	uncultured soil bacterium	uncultured soil bacterium	B4204_uncultured soil bacterium	Copiotroph	0	0	4.53248e-05	0	0	0	0	5.32385e-05	9.81848e-05	0	0.00012118	0	0	0.000117015	0	0	0	0	0	0	0	2.51667e-05	5.23044e-05	0	0	0	0	8.30602e-05
e999ebd4a186b7ca2b53f6878705f136	Bacteria	Chloroflexi	Dehalococcoidia	RBG-13-46-9	uncultured bacterium	uncultured bacterium	uncultured bacterium	B1672_uncultured bacterium	Copiotroph	1.16717e-05	1.55248e-05	1.76263e-05	9.43849e-06	6.20814e-05	8.03725e-05	0.000170747	5.32385e-05	0.000210396	0.00013314	0.000125932	0.000350503	0.000175844	5.48507e-05	0.000118366	8.24867e-05	4.34501e-05	3.41556e-05	4.16566e-05	2.51692e-05	7.13103e-05	8.69396e-05	5.01251e-05	4.24167e-05	0	2.54497e-05	1.97766e-05	3.62057e-05
ea123165a7f309b0b5e1c67f1ea16c54	Bacteria	Omnitrophicaeota	uncultured bacterium	uncultured bacterium	uncultured bacterium	uncultured bacterium	uncultured bacterium	B10486_uncultured bacterium	Copiotroph	0	0	0	0	0	0	0	0	4.67546e-06	1.17972e-05	9.50433e-06	3.01869e-05	0	0	3.94552e-05	0	0	0	0	0	2.5468e-05	0	0	0	0	0	0	0
ec18d341ba994a7b100eaba9ff964b6b	Bacteria	Chloroflexi	Anaerolineae	RBG-13-54-9	#N/A	#N/A	#N/A	B3656_o_RBG-13-54-9	Copiotroph	0	0	0	0	0	0	0	0	0.000799504	0	0	0	0	0	0	0	0	0	0	0	0	0	0	0	0	0	0	0
ee03235548c2029f4edc3d4f2f1f6d3d	Bacteria	Planctomycetes	#N/A	#N/A	#N/A	#N/A	#N/A	B11186_o_NA	Copiotroph	0	0	0	0	0	0	0	0	0	0	0	0	5.86147e-05	3.83955e-05	0	0	0	0	0	0	0	0	0	0	0	0	0	0
EF018407.1.1369	Bacteria	Gemmatimonadetes	Gemmatimonadetes	Gemmatimonadales	Gemmatimonadaceae	uncultured	#N/A	B740_uncultured	Copiotroph	0.000480874	0.00118377	0.000619438	0	0	0	0	0	0.000271177	0.000591544	0.000130684	0.000291806	0	0	0	0	0	0	0.000969674	0.00226313	0	0	0	0	0	0	0	0
EF018484.1.1412	Bacteria	Verrucomicrobia	Verrucomicrobiae	Chthoniobacterales	Chthoniobacteraceae	Candidatus Udaeobacter	#N/A	B761_Candidatus Udaeobacter	Copiotroph	0	0	0	0	0	0	0	0	0	0	0	0	0.000518514	0.00341537	0.00100329	0.00049492	0	0	0	0.000864141	0	0	0	0	0	0	0	0
EF018513.1.1349	Bacteria	Chloroflexi	KD4-96	uncultured Chloroflexi bacterium	uncultured Chloroflexi bacterium	uncultured Chloroflexi bacterium	uncultured Chloroflexi bacterium	B240_uncultured Chloroflexi bacterium	Copiotroph	0.000415512	0.000403645	0.00059174	0.00166306	0	0.000188145	0.000418111	0.000400354	0.00361647	0.00180834	0.000439575	0.000808337	0	0.00231836	0.00150775	0.0022329	0	0	0	0.000346076	0	0.00361257	0.000621115	0.00017293	0.000372889	0.000453005	0.00111188	0
EF018609.1.1388	Bacteria	Proteobacteria	Gammaproteobacteria	Betaproteobacteriales	Nitrosomonadaceae	MND1	#N/A	B8444_MND1	Copiotroph	0	0	0	0	0	0	0	0	0	0	0	0.000140872	0	0	0	0	0	0	0	0	0	0	0	0	0	0	0	0
EF018696.1.1348	Bacteria	Acidobacteria	Acidobacteriia	Solibacterales	Solibacteraceae (Subgroup 3)	Candidatus Solibacter	#N/A	B1096_Candidatus Solibacter	Copiotroph	0	0	0	0	0	0	0	0	0	0.000726369	0.00105023	0.00125275	0	0	0	0	0	0	0	0	0	0	0	0	0	0.00052087	0	0
EF018797.1.1353	Bacteria	Acidobacteria	Acidobacteriia	Acidobacteriales	uncultured	#N/A	#N/A	B1911_f_uncultured	Copiotroph	0	0	0	0	0	0	0	0	0	0	0.000446703	0.000888835	0	0	0	0	0	0	0.000367967	0	0	0	0	0	0	0	0	0
EF019033.1.1358	Bacteria	Chloroflexi	Anaerolineae	Anaerolineales	Anaerolineaceae	uncultured	#N/A	B1072_uncultured	Copiotroph	0.000296461	9.70301e-05	0.000171227	9.81603e-05	0.000114612	0	0	0	4.90924e-05	0	0.000308891	0	8.34132e-05	0.000120672	7.60921e-05	7.48135e-05	0	0.00040076	0.000620221	0.00107179	0	0.000288273	0.000329082	5.87308e-05	0	0	0.00010108	0
EF019065.1.1384	Bacteria	Proteobacteria	Gammaproteobacteria	Betaproteobacteriales	Nitrosomonadaceae	mle1-7	uncultured Rhodocyclaceae bacterium	B300_mle1-7	Copiotroph	0	0	0	7.92833e-05	0	0.000111425	0.00160239	0.00138846	0.00116653	0.00148307	0.000639166	0.00139027	0.000732683	0.000652724	0.000231095	0.000750054	0.000182077	0.000450855	0.000479051	0.000929161	0.000794601	0.00109361	0.000884817	0.000825494	0.000165729	0.000651512	0.00140194	0.000402522
EF019437.1.1411	Bacteria	Verrucomicrobia	Verrucomicrobiae	Chthoniobacterales	Chthoniobacteraceae	Candidatus Udaeobacter	uncultured soil bacterium	B248_Candidatus Udaeobacter	Copiotroph	0	0.000834459	0.000224106	0.00161021	0	0.000136999	0	0	0.000364686	0.00405149	0.000541747	0.00175922	0.00124218	0.00175705	0.000887742	0.000930374	0	0	0.00355239	0.00226103	0.000509359	0.000647471	0	0	0	0	0.00047244	0
EF020295.1.1364	Bacteria	Actinobacteria	Acidimicrobiia	IMCC26256	uncultured Ferrimicrobium sp.	uncultured Ferrimicrobium sp.	uncultured Ferrimicrobium sp.	B2220_uncultured Ferrimicrobium sp.	Copiotroph	0	0	0	0	0	0	0	0	0	0	0	0.000373982	0	0	0	0	0	0.000418976	0	0.000606157	0	0	7.84567e-05	0	0	0	0	0
EF125426.1.1479	Bacteria	Actinobacteria	Actinobacteria	Kineosporiales	Kineosporiaceae	#N/A	#N/A	B87_f_Kineosporiaceae	Copiotroph	0.000536898	0	0.000188853	0.000687122	0	0.000677686	0.000330548	0	0.00598927	0.0065626	0.00331701	0.00264806	0.00381446	0.00495119	0.00705684	0.00649151	0	0.00128198	0.00057625	0	0.00383038	0.0035119	0.000420615	0.00117951	0.000641108	0	0	0
EF492900.1.1488	Bacteria	Gemmatimonadetes	Gemmatimonadetes	Gemmatimonadales	Gemmatimonadaceae	Gemmatimonas	#N/A	B612_Gemmatimonas	Copiotroph	0	0	0	0	6.92446e-05	8.21991e-05	8.75624e-06	0	0.000168317	0.000318524	0.000446703	0.000555103	0.00114749	0.00151205	0.000560827	0.000968739	0	0.000195826	0.000398052	0.000618742	7.13103e-05	0.000308864	0.000117685	3.91539e-05	0.000242051	0.00028843	0.000294451	0
EF494370.1.1536	Bacteria	Dadabacteria	Dadabacteriia	Dadabacteriales	uncultured bacterium	uncultured bacterium	uncultured bacterium	B3348_uncultured bacterium	Copiotroph	0	0	0	0	3.10407e-05	0	0	0	1.40264e-05	0	0	4.86344e-05	5.18514e-05	1.09701e-05	3.38187e-05	0	0	2.73245e-05	0.000296225	0.00022023	0	3.66062e-05	0	0	8.5045e-05	0	0	0
EF516045.1.1477	Bacteria	Verrucomicrobia	Verrucomicrobiae	Chthoniobacterales	Chthoniobacteraceae	Candidatus Udaeobacter	uncultured soil bacterium	B770_Candidatus Udaeobacter	Copiotroph	0	0	0	0	0	0.000113252	0	0	0.0010099	0	0.00118804	0	0.00105957	0	0.000989198	0	0	0	0.00049988	0.000740393	0.00109003	0.000613153	0	0	0	0	0	0
EF516066.1.1507	Bacteria	Verrucomicrobia	Verrucomicrobiae	Pedosphaerales	Pedosphaeraceae	ADurb.Bin063-1	#N/A	B998_ADurb.Bin063-1	Copiotroph	0	0	0	0	0	0	0	0	0	0.000680866	0	0.000939147	0	0	0.00215031	0.000822949	0	0	0	0	0	0	0	0	0	0	0	0
EF516096.1.1480	Bacteria	Verrucomicrobia	Verrucomicrobiae	Chthoniobacterales	Chthoniobacteraceae	Chthoniobacter	uncultured bacterium	B7564_Chthoniobacter	Copiotroph	0	0	0	0	0	0	0	0	3.97414e-05	4.55034e-05	5.7026e-05	2.01246e-05	0	0	0	0	0	0	0	2.9364e-05	0	0	0	1.46827e-05	0	0	0	0
EF516103.1.1432	Bacteria	Proteobacteria	Deltaproteobacteria	Bdellovibrionales	Bdellovibrionaceae	Bdellovibrio	uncultured bacterium	B1779_Bdellovibrio	Copiotroph	7.46988e-05	0	0.000302165	0.000390753	0	8.40258e-05	0	7.8793e-05	2.57151e-05	0.000301671	0	0.00011907	2.93073e-05	4.75373e-05	8.7365e-05	3.45293e-05	0	8.88047e-05	7.40562e-05	6.50203e-05	0	6.17729e-05	7.19186e-05	0	1.52645e-05	0	0	0
EF516209.1.1441	Bacteria	Acidobacteria	Blastocatellia (Subgroup 4)	Blastocatellales	Blastocatellaceae	uncultured	uncultured Acidobacteriales bacterium	B1110_uncultured	Copiotroph	0	0	0	0	3.58162e-05	0	0	0	9.35093e-05	0.000175272	0	0.000144226	0.000160063	0	0	0.000176483	0	0	0.000317053	0.00141996	0.000751305	0.000672638	0	0	9.37675e-05	6.61692e-05	0	0
EF516271.1.1449	Bacteria	Actinobacteria	Acidimicrobiia	Microtrichales	metagenome	metagenome	metagenome	B994_metagenome	Copiotroph	0	0	0	0	0	0	0	0	0	0	0	0	0.000403539	0.00204776	0	0.00105123	0	0.000393928	0.000349453	0	0	0	0	0	0	0	0	0
EF516290.1.1417	Bacteria	Acidobacteria	Acidobacteriia	Solibacterales	Solibacteraceae (Subgroup 3)	Candidatus Solibacter	#N/A	B1675_Candidatus Solibacter	Copiotroph	0	0	0	0	0	0	0	0	0	0	0.000558379	0.000536655	0	0	0	0	0	0	0.000601707	0	0	0	0.000492534	0	0	0	0	0
EF516364.1.1456	Bacteria	Actinobacteria	Thermoleophilia	Solirubrobacterales	Solirubrobacteraceae	Conexibacter	#N/A	B206_Conexibacter	Copiotroph	0.0014823	0.000731607	0.000768003	0	0	0	0	0.000574976	0.000280528	0.00199035	0.00231668	0.00116219	0.00151496	0.00228728	0	0.00240171	0	0	0.00478357	0.00239317	0.000267414	0.00205223	0	0	0.00149156	0.000493724	0	0
EF516394.1.1456	Bacteria	Proteobacteria	Gammaproteobacteria	Betaproteobacteriales	SC-I-84	#N/A	#N/A	B121_f_SC-I-84	Copiotroph	0	0.000784003	0.00144284	0.00115905	0	0.000531554	0.0010004	0.000387576	0.00295489	0.00345995	0.00350234	0.0035654	0.00028631	0.00221414	0.00031846	0.00125265	0	0.00142315	0.00584581	0.00556238	0.000758946	0.0033243	0.000172169	0.000502475	0.000388154	0.00171192	0.000856985	0
EF516410.1.1415	Bacteria	Chloroflexi	TK10	uncultured Chloroflexus sp.	uncultured Chloroflexus sp.	uncultured Chloroflexus sp.	uncultured Chloroflexus sp.	B9956_uncultured Chloroflexus sp.	Copiotroph	9.57079e-05	0	0	0	0	0	0	0	0	0	0	0	4.50882e-05	0	0	0	0	0	0	0	0	0	0	0	0	0	0	0
EF516704.1.1468	Bacteria	Actinobacteria	Thermoleophilia	Solirubrobacterales	67-14	uncultured Rubrobacteraceae bacterium	uncultured Rubrobacteraceae bacterium	B1332_uncultured Rubrobacteraceae bacterium	Copiotroph	0	0	0	0	0	0	0	0	0	0.00162633	0	0	0	0	0	0	0	0	0.000270768	0.000373343	0	0	0.000424974	0	0	0	0	0
EF516814.1.1414	Bacteria	Proteobacteria	Gammaproteobacteria	Betaproteobacteriales	Nitrosomonadaceae	Ellin6067	#N/A	B452_Ellin6067	Copiotroph	0.000919729	0.00143799	0.000702534	0.000579523	0	0	0	0	0.0011525	0.00169037	0.00397756	0.00147077	0	0	0	0	0	0	0	0	0	0	0	0	0	0	0	0
EF516853.1.1255	Bacteria	Acidobacteria	Acidobacteriia	Acidobacteriales	Koribacteraceae	Candidatus Koribacter	#N/A	B1061_Candidatus Koribacter	Copiotroph	0	0	0	0	0	0	0	0	0.000766776	0.00156903	0	0.000588644	0	0	0	0.000761563	0	0	0	0	0	0	0	0	0	0	0	0
EF516912.1.1417	Bacteria	Chloroflexi	KD4-96	#N/A	#N/A	#N/A	#N/A	B479_o_NA	Copiotroph	0.000289458	0.000271684	0.000478428	0.000413406	0	0	0.00018607	0	0.00315828	0.00327456	0	0.000273359	0	0.000159067	0.000935651	0.000207176	0	0	0.000571622	0.00088931	0	0	0	0	0	0	0	0
EF516921.1.1412	Bacteria	Chloroflexi	Ktedonobacteria	Ktedonobacterales	Ktedonobacteraceae	HSB OF53-F07	uncultured Ktedonobacter sp.	B1389_HSB OF53-F07	Copiotroph	0	0	0	0	0	0	0	0	6.77942e-05	7.41537e-05	0.000239984	0.000139195	0.000417066	0	0.000904651	0.000305009	0	0.000491841	0.000404995	0	0	0	0	0	0	9.16189e-05	0	0
EF516947.1.1413	Bacteria	Acidobacteria	Acidobacteriia	Solibacterales	Solibacteraceae (Subgroup 3)	Candidatus Solibacter	#N/A	B1132_Candidatus Solibacter	Copiotroph	0	0	0	0	0	0	0	0	0.000645214	0	0.000662927	0.00064734	0	0.000466231	0	0.000370231	0	0	0	0.000260081	0	0	0	0.000500843	0	0	0	0
EF522301.1.1374	Bacteria	Actinobacteria	Thermoleophilia	Solirubrobacterales	67-14	#N/A	#N/A	B3713_f_67-14	Copiotroph	0	0	0	0	0	0	0	0	0	0	0	0	0.000317872	0.000352873	0	0	0	0	0	0	0	0	0	0	0	0	0	0
EF550492.1.1471	Bacteria	Actinobacteria	Actinobacteria	Streptomycetales	Streptomycetaceae	Streptomyces	#N/A	B2518_Streptomyces	Copiotroph	0	0	0	0	0	0	0	0	0	0.000822432	0	0	0	0	0	0.000214849	0	0	0	0	0	0	0	0	0	0	0	0
EF562552.1.1348	Bacteria	Bacteroidetes	Bacteroidia	Bacteroidales	Paludibacteraceae	uncultured	uncultured soil bacterium	B8399_uncultured	Copiotroph	0	0	0	0	0	0	0	0	0.000100522	0	0	0	0	0	0	0	0	0	0	0	0	0	7.62773e-05	0	0	0	0	1.49082e-05
EF632907.1.1542	Bacteria	Actinobacteria	Thermoleophilia	Solirubrobacterales	67-14	metagenome	metagenome	B1066_metagenome	Copiotroph	9.33735e-05	0	6.2951e-05	0.00021331	0.000121775	0.000275824	8.75624e-05	0	0.000540016	0.000798838	0.000140189	0.000105654	0	4.93657e-05	6.2001e-05	4.41208e-05	0	0	0.000236054	0	5.60295e-05	0.000292849	0.000350876	0.000213715	0.00013738	0	4.17505e-05	8.73197e-05
EF688191.1.1513	Bacteria	Acidobacteria	Aminicenantia	Aminicenantales	uncultured microorganism	uncultured microorganism	uncultured microorganism	B2124_uncultured microorganism	Copiotroph	0	0	0	0	0	0	0	0	0	0	0	0	7.21411e-05	2.5597e-05	0.000186003	0.000441208	0	0	0	0	0.000117153	0.000235652	0	0	0	0	0	0.00059633
EU133650.1.1359	Bacteria	Bacteroidetes	Bacteroidia	Chitinophagales	Chitinophagaceae	uncultured	#N/A	B4_uncultured	Copiotroph	0.00422749	0.00377447	0.00400369	0.00375085	0.00602667	0.00449173	0.00853296	0.00686138	0.00900962	0.00620026	0.0107375	0.00656732	0.00328918	0.00246097	0.0125355	0.0115213	0.000728307	0.00312866	0.0119045	0.00801428	0.00207309	0.00337005	0.0130761	0.0118685	0.00697805	0.00494742	0.00590001	0.0009307
EU133890.1.1351	Bacteria	Proteobacteria	Gammaproteobacteria	Betaproteobacteriales	Burkholderiaceae	uncultured	Burkholderiales bacterium X4	B4007_uncultured	Copiotroph	0	0	0	0	0	0	0	0	0.000392739	0	0.000301762	0	0	0	0	0	0	0	0	0	0	0	0	0	0	0	0	0
EU134126.1.1333	Bacteria	Chloroflexi	P2-11E	uncultured bacterium	uncultured bacterium	uncultured bacterium	uncultured bacterium	B12825_uncultured bacterium	Copiotroph	0	0	0	0	0	0	0	0	0	0	1.18804e-05	0	1.80353e-05	3.83955e-05	0	0	0	0	0	0	0	0	0	0	0	0	0	0
EU134452.1.1417	Bacteria	Proteobacteria	Deltaproteobacteria	Myxococcales	Polyangiaceae	Sorangium	uncultured bacterium	B8587_Sorangium	Copiotroph	0	0	0	0	0	0	0	0	0	0	0	0	0	0	0	0	0	0	0	0	0	0	0.000178707	0	0	0	0	0
EU135308.1.1272	Bacteria	Patescibacteria	Saccharimonadia	Saccharimonadales	uncultured soil bacterium	uncultured soil bacterium	uncultured soil bacterium	B10394_uncultured soil bacterium	Copiotroph	0	0	0	0	0	0	0	0	0	0	0	0	2.02897e-05	4.20522e-05	0	4.60391e-05	0	0	0	0	0	0	0	0	0	0	0	0
EU234193.1.1485	Bacteria	Bacteroidetes	Bacteroidia	Bacteroidales	Bacteroidetes vadinHA17	#N/A	#N/A	B1724_f_Bacteroidetes vadinHA17	Copiotroph	0	0	0	0	0	0	0	0	0	0	0.000194839	0.00153114	0	0	0	0	0	0	0	0	0	0	0	0	0	0	0	0
EU266873.1.1530	Bacteria	Proteobacteria	Deltaproteobacteria	Sva0485	#N/A	#N/A	#N/A	B1960_o_Sva0485	Copiotroph	7.00301e-06	0	1.00722e-05	0	7.16324e-06	1.82665e-05	2.62687e-05	6.38862e-05	4.20792e-05	0	2.61369e-05	6.03737e-05	0.000164572	9.32462e-05	0.000231095	0.000195666	0.000101384	0.000111575	2.31426e-05	0	0.000351458	0.000169303	5.44838e-05	2.44712e-05	4.57934e-05	1.52698e-05	1.53818e-05	2.76867e-05
EU283356.1.1477	Bacteria	Proteobacteria	Deltaproteobacteria	Oligoflexales	0319-6G20	uncultured gamma proteobacterium	uncultured gamma proteobacterium	B14537_uncultured gamma proteobacterium	Copiotroph	0	0	0	0	0	0	0	0	0	0	3.80173e-05	0	0	0	0	0	0	0	0	0	0	0	1.74348e-05	0	0	0	0	0
EU335429.1.1483	Bacteria	Actinobacteria	Acidimicrobiia	IMCC26256	#N/A	#N/A	#N/A	B11310_o_IMCC26256	Copiotroph	0	0	0	0	0	0	0	0	0	0	0	0	1.57809e-05	6.76492e-05	5.63645e-06	0	0	0	0	0	0	0	0	0	0	0	0	0
EU360304.1.1433	Bacteria	Proteobacteria	Deltaproteobacteria	MBNT15	uncultured prokaryote	uncultured prokaryote	uncultured prokaryote	B1_uncultured prokaryote	Copiotroph	0.00841762	0.00777017	0.00479183	0.00739411	0.0144244	0.0205333	0.0097041	0.00952756	0.0199222	0.0111197	0.02114	0.0290414	0.0140923	0.0136176	0.0123297	0.0115827	0.0126523	0.0069131	0.00704229	0.00329506	0.0230638	0.0213322	0.0142355	0.0187808	0.011348	0.0149984	0.00979599	0.0149679
EU399670.1.1496	Bacteria	Proteobacteria	Deltaproteobacteria	Desulfobacterales	Desulfobacteraceae	Sva0081 sediment group	#N/A	B550_Sva0081 sediment group	Copiotroph	2.80121e-05	0.00012808	6.2951e-05	3.96416e-05	0.000503814	0.000896884	0.000345872	9.79588e-05	0.000528327	0.000449978	0.000247112	0.00023311	0.000570366	0.000179179	0.000673556	0.000838295	0.000107591	0.000316509	4.39709e-05	3.77537e-05	0.00100344	0.00123317	0.000355234	0	8.06837e-05	0	0.000327412	0.000896624
EU449666.1.1462	Bacteria	Acidobacteria	Subgroup 6	#N/A	#N/A	#N/A	#N/A	B605_o_NA	Copiotroph	0	0	0.000211516	0	0.00147085	0	0	0	0.0013442	0.000726369	0	0.00027839	0.00261061	0.000276082	0.000335369	0	0	0	0	0.00105291	0	0.000402668	0	0.000187612	0	0	0.00015162	0
EU528219.1.1338	Bacteria	Proteobacteria	Gammaproteobacteria	Betaproteobacteriales	Nitrosomonadaceae	Ellin6067	#N/A	B818_Ellin6067	Copiotroph	0	0	0	0	0	0	0	0	0	0.00194148	0.000869646	0.0022137	0	0	0	0	0	0	0	0	0	0	0	0	0	0	0	0
EU528261.1.1371	Bacteria	Latescibacteria	uncultured soil bacterium PRR-12	uncultured soil bacterium PRR-12	uncultured soil bacterium PRR-12	uncultured soil bacterium PRR-12	uncultured soil bacterium PRR-12	B4365_uncultured soil bacterium PRR-12	Copiotroph	0	0	0	0	0	0	0	0	0	0	0.000213847	0	0	0	0	0	0	0	0.000203655	0	0	0	0.000172169	0	0	0	0	0
EU589314.1.1511	Bacteria	Proteobacteria	Deltaproteobacteria	Myxococcales	Blfdi19	uncultured soil bacterium	uncultured soil bacterium	B6552_uncultured soil bacterium	Copiotroph	0	0	0	6.04063e-05	0	0	0	0	0	7.5839e-05	0.000133061	0	0	0	0	0	0	0	0	0	0	0	0	0	0	0	0	0
EU644261.1.1494	Bacteria	Bacteroidetes	Ignavibacteria	Kryptoniales	BSV26	uncultured prokaryote	uncultured prokaryote	B873_uncultured prokaryote	Copiotroph	0.0006186	0.00067533	0.000135974	0	1.43265e-05	0	0	0.000121384	0.000521314	0.000320209	0.000553627	0.000509822	0.000335907	0	0.000465007	0.000251297	0.000420018	0.000109298	0	0	0.00033363	7.77881e-05	0	0	0	0	7.69089e-05	0
EU665027.1.1453	Bacteria	Acidobacteria	Subgroup 6	#N/A	#N/A	#N/A	#N/A	B757_o_NA	Copiotroph	0	0	0.000768003	0	0	0	0	0	0.000535341	0.00274032	0	0.00111859	0	0	0	0.000239787	0	0	0.000432766	0	0	0	0	0	0	0	0	0
EU677395.1.1408	Bacteria	Actinobacteria	Acidimicrobiia	Microtrichales	Ilumatobacteraceae	uncultured	uncultured Acidimicrobiaceae bacterium	B6959_uncultured	Copiotroph	0	0	0	0	0	0	0	0	0	0	0	0.000199569	0	0	0	0	0	0	0	0	0	0	0	0	0	0	0	0
EU704872.1.1281	Bacteria	Actinobacteria	Actinobacteria	Kineosporiales	Kineosporiaceae	Angustibacter	Angustibacter sp.	B3189_Angustibacter	Copiotroph	0	0	0	0	0	0	0	0	0.00022676	0.000262909	0.000133061	0	0	0	0	0	0	0	5.78564e-05	8.80921e-05	0	2.97425e-05	6.75599e-05	0	0	0	0	0
EU723093.1.1288	Bacteria	Bacteroidetes	Bacteroidia	Sphingobacteriales	Sphingobacteriaceae	Mucilaginibacter	#N/A	B855_Mucilaginibacter	Copiotroph	0	0	0	0	0	0	0	0	0.00150082	0.000888159	0.000950433	0	0	7.6791e-05	0	0	0	0	0.000502194	0.000778146	0	0	0	0.000758607	0	0	0	0
EU790279.1.1202	Bacteria	Proteobacteria	Gammaproteobacteria	Gammaproteobacteria Incertae Sedis	Unknown Family	Candidatus Ovatusbacter	#N/A	B9880_Candidatus Ovatusbacter	Copiotroph	0	0	0	0	0	0	0	0	7.0132e-05	0	0	0	1.80353e-05	0	3.10005e-05	0	0	2.96016e-05	0	0	0	0	0	0	0	0	0	0
EU801764.1.1446	Bacteria	Proteobacteria	Alphaproteobacteria	Caulobacterales	Caulobacteraceae	Phenylobacterium	unidentified	B617_Phenylobacterium	Copiotroph	0	0	0	0	0	0	0	0	0.000523652	0	0	0	0.000238967	0.000495485	0.000498826	0.00315752	0	0.000548767	0	0.000501286	0.000993251	0.00150543	0	0	0	0	0.000257095	0
EU808666.1.1311	Bacteria	Proteobacteria	Gammaproteobacteria	Betaproteobacteriales	Sulfuricellaceae	Sulfuricella	#N/A	B5828_Sulfuricella	Copiotroph	0	0	0	0	0	0	0	0	0	0	0	0	0.000139773	0	0	0	0	0	0	0	0	0	0.000215756	0	0	0	0	0
EU861970.1.1512	Bacteria	Actinobacteria	Thermoleophilia	Gaiellales	uncultured	#N/A	#N/A	B158_f_uncultured	Copiotroph	0	0.000265862	0	0	0.00157114	0.00182665	0.00111204	0.00132031	0.00168317	0.00340264	0.000301762	0.0019286	0.00174717	0.00203862	0.00239267	0.00325727	0.000732445	0.00172828	0.000516079	0.0013864	0.000239399	0.00184175	0.000560093	0.000973953	0.000996552	0.00129115	0.000153818	0.000200196
EU937875.1.1490	Bacteria	Bacteroidetes	Bacteroidia	Chitinophagales	Chitinophagaceae	Ferruginibacter	#N/A	B241_Ferruginibacter	Copiotroph	0	0	0	0.00042662	0.00110075	0.000264864	0.00413076	0.00150771	0.00328685	0.00243696	0.00354036	0.00165189	0.000324635	0.000190149	0.00141475	0	0	0	0	0.000132138	0	0	0.000549197	0.000722715	0.000224606	0.000127248	0.000991026	0.000815694
EU937916.1.1436	Bacteria	Proteobacteria	Gammaproteobacteria	Betaproteobacteriales	Methylophilaceae	Methylotenera	#N/A	B895_Methylotenera	Copiotroph	0	0	0	0	9.31221e-05	0	0	0	0.000794829	0.000160105	0.000781731	0.000588644	0	0	0	0	0.00189525	0	0	0	0	0	0	0	0	0	0	0.000881716
EU979110.1.1476	Bacteria	Gemmatimonadetes	Gemmatimonadetes	Gemmatimonadales	Gemmatimonadaceae	uncultured	uncultured alpha proteobacterium	B196_uncultured	Copiotroph	0.00122319	0.00235201	0	0	0.000136102	0.000144305	9.85077e-05	0	0	0.00115275	0.00234044	0.0023529	0	0.00015541	0	0.00174373	0.000637268	0.000537382	0.00528114	0.00267003	0.000280148	0	0.002406	0.000469847	0.00237036	0.000889043	0	0.00016612
f03e5fd8501e4a738890b9d04582c0c0	Bacteria	Planctomycetes	Planctomycetacia	Isosphaerales	Isosphaeraceae	uncultured	uncultured Isosphaera sp.	B5576_uncultured	Copiotroph	0	0	0	0	0	0	0	0	0	0	0	0	0.000157809	0	0.000171912	0	0	0	9.95131e-05	0	0	0	0	0	0	0	0	0
f162e0701b11badda070151100b4ffd8	Bacteria	TA06	uncultured bacterium	uncultured bacterium	uncultured bacterium	uncultured bacterium	uncultured bacterium	B1182_uncultured bacterium	Copiotroph	0.000147063	0.00019406	9.31675e-05	3.20909e-05	0	0	0.000111642	1.49068e-05	0.000144939	0.000123028	0.000389677	6.70819e-05	0.000651525	0.000404067	0.000496008	0.00032611	0	0	0	2.9364e-05	0	0.000155576	0.000187424	3.58911e-05	0	0	0.000149423	0
f16a264d489cdcff68ca4e136a4ecd21	Bacteria	Chloroflexi	Anaerolineae	Anaerolineales	Anaerolineaceae	Anaerolinea	uncultured Chloroflexi bacterium	B833_Anaerolinea	Copiotroph	0	0	0	0	0	0	0	0	0.000140264	0	0	0	0.000326889	0.000839216	0	0	0.000848312	0	0	0	0	0	0.00229922	0.000303443	0	0	0	0.000951998
f3d506e6544a88d56b2680baef5e26df	Bacteria	Planctomycetes	Planctomycetacia	Isosphaerales	Isosphaeraceae	uncultured	uncultured Isosphaera sp.	B6776_uncultured	Copiotroph	0	0	0	0	0	0	0	0	3.74037e-05	0	4.51455e-05	4.69573e-05	0	0	0	0	0	0	0	0.000130041	0	0	0	0	0	0	0	0
f40ea75022a48633a9de1530eb311eb9	Bacteria	Proteobacteria	Deltaproteobacteria	Myxococcales	Sandaracinaceae	uncultured	uncultured prokaryote	B5624_uncultured	Copiotroph	0	0	0	0	2.62652e-05	0	0	0	5.61056e-05	0	0	0.000172736	0	0	1.12729e-05	2.49378e-05	0	0	0	0	4.32956e-05	0	0	0	0	0	0	0
f414b236d21d12e211a4552918e2ba1b	Bacteria	Bacteroidetes	Bacteroidia	Bacteroidales	Paludibacteraceae	uncultured	uncultured soil bacterium	B6016_uncultured	Copiotroph	0	0	5.7915e-05	0	0	0	0	0	0	0	8.31628e-05	0	5.18514e-05	0	6.76375e-05	4.60391e-05	0	0	0	0	6.11231e-05	0	0	0	0	0	0	0
f54ece7632d4d748ebd7e84218499b60	Bacteria	#N/A	#N/A	#N/A	#N/A	#N/A	#N/A	B1676_o_NA	Copiotroph	0.000109714	5.43369e-05	0.000105758	0.000149128	2.62652e-05	5.84527e-05	4.15921e-05	1.27772e-05	0.000149615	9.43775e-05	0.000211471	0.000194538	0.000123993	0	7.89104e-05	0.000118934	3.72429e-05	2.73245e-05	2.54568e-05	0.000119553	0.000249586	5.49092e-05	5.88425e-05	1.63141e-05	8.72256e-06	6.95625e-05	6.59219e-06	0
f6123be6ef84a78574b4bf3d63584d17	Bacteria	Omnitrophicaeota	uncultured bacterium	uncultured bacterium	uncultured bacterium	uncultured bacterium	uncultured bacterium	B1552_uncultured bacterium	Copiotroph	0	0	0	0	0	0	0	0	3.74037e-05	0	0.000330275	0.000706037	0.000277292	0.000188321	0.000140911	0	0	0	0	0	7.38571e-05	0.000260819	0	0	0	7.63491e-05	0.000263688	6.17627e-05
f66aabd9c38f1f68ae87b5a82942c21d	Bacteria	Omnitrophicaeota	uncultured bacterium	uncultured bacterium	uncultured bacterium	uncultured bacterium	uncultured bacterium	B3760_uncultured bacterium	Copiotroph	0	0	0	0	0	0	0	0	0	0	0.000171078	0.000120747	0	0	0	0	0	0	0	0	0.000165542	0.00026997	0	0	0	0	0	0
f700144bf059feab51668609692f5974	Bacteria	Gemmatimonadetes	Gemmatimonadetes	Gemmatimonadales	Gemmatimonadaceae	uncultured	uncultured prokaryote	B3588_uncultured	Copiotroph	0	0	0	0.000113262	0	0	0	0	0	4.8874e-05	0	0	8.11588e-05	3.65671e-05	9.58197e-05	0	0	0	8.0999e-05	0.000287348	0	0	0	0	0	0	0	0
f75d5fc6526e00d46a8166d407adc2b1	Bacteria	Planctomycetes	Planctomycetacia	Pirellulales	Pirellulaceae	#N/A	#N/A	B11191_f_Pirellulaceae	Copiotroph	0	0	0	0	0	0	0	0	0	0	4.75216e-05	0	0	0	7.60921e-05	0	0	0	0	0	0	0	0	0	0	0	0	0
f794a4bc30be1d3c6f18311fabe4cef1	Bacteria	Proteobacteria	Gammaproteobacteria	HOC36	uncultured soil bacterium	uncultured soil bacterium	uncultured soil bacterium	B695_uncultured soil bacterium	Copiotroph	7.93675e-05	0	1.25902e-05	1.69893e-05	0.000212509	0.000253904	2.18906e-05	0	0.000502612	0	0	0.000555103	0.00110466	0.000228545	0.00089056	0	0	0.000107021	0.00146493	0.000585183	0.000417675	0.00112106	0.000204859	0	9.37675e-05	0	0	0
f7c42abe0d99b0c0de51bcbbcc17dce3	Bacteria	#N/A	#N/A	#N/A	#N/A	#N/A	#N/A	B20005_o_NA	Copiotroph	0	0	0	0	0	0	0	0	0	0	0	0	9.01764e-06	0	5.63645e-06	0	0	0	0	0	0	0	0	0	0	0	0	0
f7e8c231cf089a3fd15aaef28931621b	Bacteria	WOR-1	uncultured bacterium	uncultured bacterium	uncultured bacterium	uncultured bacterium	uncultured bacterium	B16165_uncultured bacterium	Copiotroph	0	0	0	0	0	0	0	0	0	0	0	0	2.47985e-05	0	1.69094e-05	0	0	0	0	0	0	0	0	0	0	0	0	0
f8f260049337d1cb241655b4692afe86	Bacteria	Planctomycetes	Planctomycetacia	Isosphaerales	Isosphaeraceae	Aquisphaera	#N/A	B7433_Aquisphaera	Copiotroph	0	0	0	0	0	0	0	0	0	0	0	0	0.000182607	0	0	0	0	0	0	0	0	0	5.44838e-05	0	0	0	0	0
f9efd120b6c734b74814742493e36344	Bacteria	Patescibacteria	Gracilibacteria	Candidatus Abawacabacteria	uncultured organism	uncultured organism	uncultured organism	B18751_uncultured organism	Copiotroph	0	0	0	0	0	0	0	0	9.35093e-06	0	1.18804e-05	0	0	0	0	0	0	0	0	0	0	0	0	0	0	0	0	0
fa930b20f8696d19067263059d0dfc07	Bacteria	Proteobacteria	Deltaproteobacteria	Oligoflexales	0319-6G20	uncultured marine bacterium	uncultured marine bacterium	B13435_uncultured marine bacterium	Copiotroph	0	0	0	0	0	0	0	0	0	0	0	5.03114e-05	0	0	0	0	0	0	0	0	0	0	0	0	0	0	0	0
fa93e84e5ee087f18be794007000104a	Bacteria	Planctomycetes	Phycisphaerae	Pla1 lineage	uncultured bacterium	uncultured bacterium	uncultured bacterium	B9884_uncultured bacterium	Copiotroph	0	0	0	0	0	0	0	0	0	0	4.27695e-05	7.37901e-05	0	0	0	0	0	0	0	0	0	0	0	0	0	0	0	0
fa955c771512395aff5b6610b3badba0	Bacteria	Actinobacteria	Thermoleophilia	Gaiellales	uncultured	metagenome	metagenome	B18366_metagenome	Copiotroph	0	0	0	0	0	0	0	0	2.33773e-05	0	0	0	0	0	0	0	0	0	0	0	0	0	0	0	0	0	0	0
fac06e4eb01a88217ffd1e2c5957348e	Bacteria	Verrucomicrobia	Verrucomicrobiae	Pedosphaerales	Pedosphaeraceae	uncultured bacterium	uncultured bacterium	B1139_uncultured bacterium	Copiotroph	0	0	0.000176263	0	0.000269815	0.000115079	0	0	0.000112211	0	0.00058214	0.000521562	0.000694358	0.000159067	0	0.000312682	0	0.000184441	0	0	8.40443e-05	0.000160152	0.000185245	0	0	0	0.000221937	6.38925e-05
fad227b171d22c4a3ecc7d454fd585c8	Bacteria	Latescibacteria	Latescibacteria	Latescibacterales	Latescibacteraceae	Candidatus Latescibacter	metagenome	B3049_Candidatus Latescibacter	Copiotroph	0	0	0	0	0	0	0	0	7.24697e-05	4.04475e-05	0	0.000181121	0	0	3.6637e-05	0	0	0	0	0	0.00038202	0.000260819	0	0	0	0	0	2.76867e-05
fadc1e412a19b53c585e065960db9052	Bacteria	Proteobacteria	Deltaproteobacteria	Deltaproteobacteria Incertae Sedis	Unknown Family	Deferrisoma	uncultured delta proteobacterium	B1786_Deferrisoma	Copiotroph	0.000196084	0	0.000118348	0	0.000102673	6.39327e-05	6.56718e-05	0	0.00022676	5.89859e-05	0.000223352	0	0.000245731	8.41044e-05	0.000169094	8.05684e-05	0	6.37572e-05	0.000122656	5.24357e-05	0	0.000125834	0	0	8.5045e-05	0	0	6.60222e-05
fb8e3fbc2e0bf81e0664cb87d56f64dd	Bacteria	Planctomycetes	Planctomycetacia	Pirellulales	Pirellulaceae	#N/A	#N/A	B16719_f_Pirellulaceae	Copiotroph	0	0	0	0	0	0	0	0	7.0132e-06	0	0	0	9.01764e-06	0	0	0	0	0	0	1.67794e-05	0	0	0	0	0	0	0	0
fc3da29309032b1e72d60f249afa5598	Bacteria	Planctomycetes	Phycisphaerae	Phycisphaerales	AKAU3564 sediment group	#N/A	#N/A	B8800_f_AKAU3564 sediment group	Copiotroph	0	0	0	0	0	0	0	0	2.33773e-05	0.000114601	0	0	0	0	0	0	0	0	0	0	0	0	0	0	0	0	0	0
fc6b7399380b68eaebed1d4062a15b9e	Bacteria	WS1	#N/A	#N/A	#N/A	#N/A	#N/A	B11193_o_NA	Copiotroph	0	0	0	0	0	0	0	0	9.35093e-06	0	4.51455e-05	0	3.60706e-05	0	0	0	0	0	1.85141e-05	0	0	0	0	0	0	0	0	0
fcc40302965e58c65a37bbe5a56c7331	Bacteria	Latescibacteria	uncultured soil bacterium	uncultured soil bacterium	uncultured soil bacterium	uncultured soil bacterium	uncultured soil bacterium	B3147_uncultured soil bacterium	Copiotroph	0	0	3.27345e-05	0	0	0	0	0	0.000203383	0	0.000216223	0	0	0	0	0	0.000300013	0	9.95131e-05	6.71178e-05	0	4.11819e-05	0	0	0	0	0	0
ff25a0f6596985ebe2823b402bb8adf1	Bacteria	Bacteroidetes	Bacteroidia	#N/A	#N/A	#N/A	#N/A	B12289_o_NA	Copiotroph	0	0	0	0	0	0	0	0	0	0	9.02911e-05	0	0	0	0	0	0	0	0	0	0	0	0	0	0	0	0	0
ff6bbf118c03a099016eca2291f9ec07	Bacteria	Chloroflexi	Anaerolineae	SBR1031	#N/A	#N/A	#N/A	B386_o_SBR1031	Copiotroph	0.000226431	0.00022705	0.000193889	3.77539e-05	0.000291305	7.85458e-05	0.000503484	0.000359892	0.00100756	0.00016179	0.000453832	0.000526593	0.000313363	0.00040041	0.000673556	0.000335702	0.000333117	0.000195826	0.000731305	0	0.000180823	0.000302001	0.00175002	0.00154005	0.000479741	0.000692232	0.000123054	0.0021191
ffa847139eb5db8ab37994e8cdffb6c0	Bacteria	Spirochaetes	Spirochaetia	Spirochaetales	Spirochaetaceae	#N/A	#N/A	B10580_f_Spirochaetaceae	Copiotroph	0	0	0	0	0	0	0	0	0	8.42656e-06	0	0	0	0	0	0	0	0	6.71135e-05	0	0	0	4.3587e-05	0	0	0	0	0
FJ004751.1.1321	Bacteria	Acidobacteria	Acidobacteriia	Solibacterales	Solibacteraceae (Subgroup 3)	Bryobacter	#N/A	B349_Bryobacter	Copiotroph	0	0	0	0	0	0	0.0004203	0	0.000799504	0.000578062	0.000579764	0.00103138	0.0015871	0.00139687	0.000374824	0.00193364	0	0	0	0	0.000820069	0	0.00167592	0.00341618	0	0	0	0
FJ004766.1.1372	Bacteria	Acidobacteria	Subgroup 6	uncultured proteobacterium	uncultured proteobacterium	uncultured proteobacterium	uncultured proteobacterium	B661_uncultured proteobacterium	Copiotroph	0	0	0	0	0	0	0	0	7.94829e-05	0	0	0.000987781	0.00248436	0	0	0	0	0.000430361	0.00345287	0	0	0	0	0	0	0.000580253	0	0
FJ269071.1.1491	Bacteria	Bacteroidetes	Bacteroidia	Sphingobacteriales	Lentimicrobiaceae	iron-reducing bacterium enrichment culture clone HN105	iron-reducing bacterium enrichment culture clone HN105	B6578_iron-reducing bacterium enrichment culture clone HN105	Copiotroph	0	0	0	0	0	0	0	0	0	0	0	0	0.000184862	0	0.000140911	0	0	0	0	0	0	0	0	0	0	0	0	0
FJ466151.1.1395	Bacteria	Acidobacteria	Acidobacteriia	Subgroup 2	uncultured Holophaga sp.	uncultured Holophaga sp.	uncultured Holophaga sp.	B309_uncultured Holophaga sp.	Copiotroph	0.00112048	0.000881033	0.00187594	0.00191979	2.14897e-05	4.56662e-05	0.000656718	0.000856075	5.37678e-05	0.000197181	0	2.01246e-05	0.00151271	0.00132739	0.00141757	0.00176675	0	0.00171234	4.16566e-05	0.00136123	6.87635e-05	0.000718396	6.32012e-05	4.73109e-05	5.01547e-05	1.86631e-05	0.000725141	1.06487e-05
FJ466261.1.1459	Bacteria	Bacteroidetes	Bacteroidia	Chitinophagales	Chitinophagaceae	#N/A	#N/A	B1104_f_Chitinophagaceae	Copiotroph	0	0	0	0	0	0	0	0	0	0.000178643	0	0	0	0	0.000155002	0.000717443	0	0.000532828	0	0.000283153	0.000916847	0.0014734	0	0	0	0	0	0
FJ484438.1.1402	Bacteria	Latescibacteria	Latescibacteria	Latescibacterales	Latescibacteraceae	uncultured Latescibacteria bacterium	uncultured Latescibacteria bacterium	B7476_uncultured Latescibacteria bacterium	Copiotroph	0	0	0	0	0	0	0	0	0	0	2.37608e-05	9.39147e-05	0	0	0	0	0	0	0	0	9.93251e-05	0	0	0	0	0	0	0
FJ484509.1.1243	Bacteria	Planctomycetes	Phycisphaerae	MSBL9	SG8-4	uncultured planctomycete	uncultured planctomycete	B622_uncultured planctomycete	Copiotroph	6.53615e-05	0.00022705	6.54691e-05	0	0.000109836	0.000100466	0	0.000149068	0.00104029	0.000660642	0.000617781	0.00125946	0	0	0.000504463	0.000577407	0.000180008	0.000482733	0.000784533	0.000176184	0.000354005	0.000414107	0	0	6.54192e-05	0	0.000303241	0.000306684
FJ484736.1.1412	Bacteria	Proteobacteria	Deltaproteobacteria	Sva0485	#N/A	#N/A	#N/A	B249_o_Sva0485	Copiotroph	0.000667621	0	0	0	0.000673344	0	0	0	0.00163174	0.00106343	0.00128546	0.00259104	0.000507242	0.000528395	0.000946924	0.00294458	0	0	0.000888675	0	0.00703171	0.00239542	0.000523044	0	0	0.000169665	0	0
FJ516811.1.1503	Bacteria	Dependentiae	Babeliae	Babeliales	Vermiphilaceae	#N/A	#N/A	B7846_f_Vermiphilaceae	Copiotroph	0	0	0	0	0	0	0	0	0	0	0	0	0.000139773	0	0	0	0	0	8.0999e-05	0	0	0	0	0	0	0	0	0
FJ538119.1.1478	Bacteria	Chloroflexi	Anaerolineae	Anaerolineales	Anaerolineaceae	RBG-16-58-14	uncultured Chloroflexi bacterium	B52_RBG-16-58-14	Copiotroph	0.000399172	0.000415289	0	0.000271828	0.00250475	0.000418302	0.00141632	0.00273433	0.0016107	0.00148307	0.00179869	0	0.00944372	0.00564414	0.00709348	0.00563595	0	0.00143226	0.000115713	0	0.013363	0.0118878	0.00242126	0.00055468	0.00168345	0.000992538	0.000676798	0
FJ562147.1.1229	Bacteria	Proteobacteria	Alphaproteobacteria	Rhizobiales	Rhizobiaceae	Allorhizobium-Neorhizobium-Pararhizobium-Rhizobium	#N/A	B4905_Allorhizobium-Neorhizobium-Pararhizobium-Rhizobium	Copiotroph	0	0	0	0	0	0	0	0	0.000107536	0	0.000247112	0	0	0	0	0	0	0	0	0	0	0	0.000139479	0	0	0	0	0
FJ716046.1.1367	Bacteria	Proteobacteria	Alphaproteobacteria	uncultured	bacterium Ellin6089	bacterium Ellin6089	bacterium Ellin6089	B1203_bacterium Ellin6089	Copiotroph	0	0	0	0	0	0	0.000286767	0	0.000245462	0.000530873	0.000346908	0.000105654	0	0	0	0	0	0	4.62852e-05	0.000482409	0.000280148	0	0.000187424	0.000109305	0	0.000700715	0	0
FJ716484.1.1302	Bacteria	Proteobacteria	Deltaproteobacteria	Desulfarculales	Desulfarculaceae	Desulfatiglans	uncultured prokaryote	B277_Desulfatiglans	Copiotroph	0	0	0	0	0.000663793	0.00186501	0.00049035	0.000440815	0.0011338	0.00138701	0.000862518	0.00210302	0.000523023	0.000484515	0.000408643	0.00147709	0.00132419	0.000776472	0.000305482	0.000469824	0.00140329	0.00208655	0.000106788	0.000363805	0	0.000137428	0.000112067	0.00163991
FJ889297.1.1448	Bacteria	Proteobacteria	Alphaproteobacteria	Rhizobiales	Xanthobacteraceae	uncultured	#N/A	B266_uncultured	Copiotroph	0	0.000357071	0	0.00062294	0.000267428	0	0.000120398	0	0.000713008	0.00170048	0.00234044	0.00300695	0	0	0	0	0.000231734	0	0.00206432	0.00051387	0.000122246	0	0.00084123	0.00195443	0.000734876	0.0013658	0	0.00336926
FJ902364.1.1389	Bacteria	Proteobacteria	Deltaproteobacteria	Syntrophobacterales	Syntrophaceae	uncultured	uncultured Smithella sp.	B286_uncultured	Copiotroph	0.000294127	0	0.00083599	0.000547432	0.000164754	0.000498675	0.00065234	0.000662287	0.00115718	0.00187238	0.000705696	0.000917345	0.000390013	0.000590559	0.00105402	0.00254174	0.000506918	0.000512335	0.000432766	5.66306e-05	0.00138291	0.00114623	0.000178707	0.00057752	0.000425225	0.000383442	0.000441677	0.00106061
FM200902.1.1416	Bacteria	Proteobacteria	Deltaproteobacteria	Myxococcales	Sandaracinaceae	Sandaracinus	uncultured bacterium	B728_Sandaracinus	Copiotroph	0.000471536	0.000318259	0.000214034	0.000168005	0.000207734	0	0.000496917	0.000227861	0.000163641	0.000289874	6.89064e-05	0.00017609	0.000279547	0.000369328	0.000214185	0.000312682	7.8624e-05	0.000154839	0.000745191	0.000608255	0.000129887	0.000151	0.000440229	5.70994e-05	0.000222425	0.000210384	0.000153818	9.58387e-05
FM209317.1.1506	Bacteria	Proteobacteria	Gammaproteobacteria	Betaproteobacteriales	TRA3-20	uncultured Nitrosomonadales bacterium	uncultured Nitrosomonadales bacterium	B5159_uncultured Nitrosomonadales bacterium	Copiotroph	0	0	0	0	0	0	0	0	0	0	0.00023048	0	0	0	0.000281823	0	0	0	0	0	0	0	0	0	0	0	0	0
FM872766.1.1509	Bacteria	Proteobacteria	Deltaproteobacteria	Myxococcales	BIrii41	uncultured Sorangiineae bacterium	uncultured Sorangiineae bacterium	B391_uncultured Sorangiineae bacterium	Copiotroph	0.000261446	0.00013002	0.000458284	0.000309582	0.000229224	0.000235638	0.000591046	0.000242768	0.000561056	0.000156734	0.00052749	0.00111524	0.000926563	0.000488171	0.000411461	0.000953393	0.000366222	0.000157116	0.000849333	0.000679567	0.000639246	0.00050791	0.000366131	0.0011061	0	0.000349509	0.00104157	6.8152e-05
FN550118.1.1400	Bacteria	Actinobacteria	Actinobacteria	Streptomycetales	Streptomycetaceae	Streptomyces	#N/A	B741_Streptomyces	Copiotroph	0	0	0	0	0	0.000454835	0	0	0.000743399	0.00111062	0.000997954	0.000737901	0	0	0	0	0	0	0.00270768	0	0	0	0	0	0	0	0	0
FN667604.1.1461	Bacteria	Proteobacteria	Gammaproteobacteria	Legionellales	Legionellaceae	Legionella	Legionella taurinensis	B12973_Legionella	Copiotroph	0	0	0	0	0	0	0	0	0	0	0	0	7.43955e-05	0	0	0	0	0	0	0	0	0	0	0	0	0	0	0
FOWQ01000013.1.1546	Bacteria	Actinobacteria	Actinobacteria	Frankiales	Geodermatophilaceae	Geodermatophilus	#N/A	B2309_Geodermatophilus	Copiotroph	0	0	0	0	0	0	0	0	0	0.000306727	0.000786483	0	0	0	0.000487553	0	0	0	0	0	0	0	0	0	0	0	0	0
FPLK01002412.16.1516	Bacteria	Bacteroidetes	Bacteroidia	Sphingobacteriales	Lentimicrobiaceae	uncultured soil bacterium	uncultured soil bacterium	B685_uncultured soil bacterium	Copiotroph	0.00010738	0.000228991	6.2951e-05	0.000807934	0	0.000191798	0	0	0.000570407	0.00078367	0.000206719	9.72688e-05	0.000599673	0.000539365	0.00102302	0.000527531	0	5.2372e-05	0.000242997	0.000106969	0.00072329	0.000180743	0	0	0	0	0.000580113	0
FPLL01002907.11.1514	Bacteria	Bacteroidetes	Bacteroidia	Cytophagales	Cytophagaceae	Sporocytophaga	metagenome	B5579_Sporocytophaga	Copiotroph	2.80121e-05	0	0	0	0	0	0	0	5.37678e-05	0	1.42565e-05	0	0	0	0	9.20782e-05	0	0	0	2.51692e-05	0	0	6.97393e-05	5.38366e-05	0	1.35732e-05	0	0
FPLM01001732.1.1401	Bacteria	Planctomycetes	Phycisphaerae	MSBL9	metagenome	metagenome	metagenome	B2447_metagenome	Copiotroph	0	0	0	0	0	0	0	0	1.63641e-05	5.73006e-05	0	0	0	0	0.000152184	0.000303091	5.17263e-05	0	9.71988e-05	0	0	0.000109818	0.000259343	5.87308e-05	6.75998e-05	0	0	0.000157601
FPLP01002637.3.1464	Bacteria	Proteobacteria	Gammaproteobacteria	Betaproteobacteriales	SC-I-84	#N/A	#N/A	B79_f_SC-I-84	Copiotroph	0	0	0	0	0	0.00113252	0.00346528	0.00100727	0.00790153	0.00976638	0.00574774	0.00525251	0.00275263	0.00332395	0.00360451	0.00368121	0	0	0.00395507	0.00178911	0	0	0.00050561	0.00159878	0	0	0	0.000221494
FPLS01004838.11.1479	Bacteria	Chloroflexi	Dehalococcoidia	S085	metagenome	metagenome	metagenome	B7032_metagenome	Copiotroph	0	0	0	0	0	0	0	0	0	0	0	0.000117393	0	0	0	0	0	0	0	0	0	0	0.00010243	0	0	0	0	0
FPLS01006449.18.1461	Bacteria	Bacteroidetes	Bacteroidia	Sphingobacteriales	env.OPS 17	#N/A	#N/A	B5161_f_env.OPS 17	Copiotroph	0	0	0	0	0	0	0	0	0	0.00010786	6.89064e-05	7.54671e-05	0	0	0	0	4.55192e-05	0	0	0	0	0	8.0636e-05	0	0	0	0	0
FPLS01007209.21.1521	Bacteria	Planctomycetes	Planctomycetacia	Planctomycetales	uncultured	#N/A	#N/A	B8536_f_uncultured	Copiotroph	0	0	0	0	0	0	0	0	0	0	7.84107e-05	8.38524e-05	0	0	0	0	0	0	0	0	0	0	0	0	0	0	0	0
FPLS01012104.11.1473	Bacteria	Proteobacteria	Alphaproteobacteria	Micropepsales	Micropepsaceae	uncultured	bacterium Ellin335	B6171_uncultured	Copiotroph	0	0	0	0	0	0	0	0	0	0	0.000349284	0	0	0	0	0	0	0	0	0	0	0	0	0	0	0	0	0
FPLS01051112.1.1376	Bacteria	Proteobacteria	Alphaproteobacteria	Caulobacterales	Caulobacteraceae	Caulobacter	#N/A	B5725_Caulobacter	Copiotroph	0	0	0	0	0	0	0	0	6.54565e-05	0	0	0	0.000157809	0.000124328	0	0	0	0	0	0	0	0	0	0	0	0	0	0
FQ658638.1.1320	Bacteria	Acidobacteria	Acidobacteriia	Solibacterales	Solibacteraceae (Subgroup 3)	GOUTB8	uncultured soil bacterium	B1426_GOUTB8	Copiotroph	0	5.43369e-05	0	7.92833e-05	0	0	0	0	0	0.000379195	0.000258993	0.0004092	0.000403539	0.000188321	0	0	0	0.000195826	0.000418881	0	0.000305616	0	0	0	0	0	0	0
FQ659097.1.1357	Bacteria	Bacteroidetes	Bacteroidia	Bacteroidales	Bacteroidetes BD2-2	uncultured soil bacterium	uncultured soil bacterium	B5490_uncultured soil bacterium	Copiotroph	1.16717e-05	0	4.53248e-05	0	0	0	1.09453e-05	1.06477e-05	3.97414e-05	0	0	0	9.9194e-05	1.46269e-05	3.38187e-05	0	0	2.04934e-05	4.62852e-05	1.67794e-05	0	0	3.48696e-05	0	0	0	2.63688e-05	0
FQ659358.1.1356	Bacteria	Bacteroidetes	Bacteroidia	Bacteroidales	Bacteroidetes vadinHA17	#N/A	#N/A	B245_f_Bacteroidetes vadinHA17	Copiotroph	0	0	0	0	0	0	0	0	0.00109873	0.000353915	0.00140664	0.000568519	0.000658288	0.00053388	0.000814468	0.00326494	0.000215181	0	0	0	8.91379e-05	0	0.00300315	0.00379793	0	0	5.05401e-05	0.0062998
FQ659370.1.1363	Bacteria	Cloacimonetes	Cloacimonadia	Cloacimonadales	PBS-18	uncultured soil bacterium	uncultured soil bacterium	B4627_uncultured soil bacterium	Copiotroph	0	0	0	0	0	0	0	0	8.64961e-05	5.05594e-05	5.22738e-05	1.00623e-05	0	2.92537e-05	7.04557e-05	0	0	0	0	0	0	0	0.0002005	0	0	0	0	1.27785e-05
FQ659407.1.1359	Bacteria	Proteobacteria	Gammaproteobacteria	Betaproteobacteriales	Gallionellaceae	Sideroxydans	#N/A	B27_Sideroxydans	Copiotroph	0	0	0	0.000373764	0.00179559	0.00404054	0.00212996	0	0.0051734	0.00530536	0.00100983	0.00283253	0.00664375	0.00428018	0.00749085	0.00708619	0.00436984	0.000890324	0.00891683	0.00353627	0.0079944	0.00349818	0.00328428	0.00245691	0.00233765	0.00214286	0.00294891	0.00016825
FQ659575.1.1368	Bacteria	Proteobacteria	Deltaproteobacteria	Myxococcales	P3OB-42	uncultured soil bacterium	uncultured soil bacterium	B1920_uncultured soil bacterium	Copiotroph	7.70331e-05	0	0	0	0.000236387	0	0	0	0.000416116	0	0.00029701	0	0	0	0.000180367	0	0	0.000448578	0	0	0	6.86365e-05	0	0	0	0	0	0.000310943
FQ659759.1.1321	Bacteria	Chloroflexi	Anaerolineae	Anaerolineales	Anaerolineaceae	uncultured	#N/A	B5491_uncultured	Copiotroph	0	0	0	0	0	0	0	0	0	0	6.89064e-05	0	2.02897e-05	0	8.17286e-05	0	6.20716e-05	0	6.2485e-05	0	0	0	0	0	0	0	0	0.000117136
FQ659916.1.1346	Bacteria	Firmicutes	Clostridia	Clostridiales	Ruminococcaceae	uncultured	uncultured soil bacterium	B1859_uncultured	Copiotroph	1.63404e-05	2.71684e-05	4.53248e-05	2.07647e-05	0	0	4.59703e-05	0	4.67546e-05	3.87622e-05	0.000135437	0.000315285	3.8325e-05	4.38806e-05	3.6637e-05	0.000224441	7.44859e-05	2.27704e-05	0	0	0.000119699	0.000102955	0.000117685	3.26282e-05	4.14322e-05	5.42927e-05	7.47115e-05	0.00016825
FQ659972.1.1350	Bacteria	Armatimonadetes	uncultured	uncultured soil bacterium	uncultured soil bacterium	uncultured soil bacterium	uncultured soil bacterium	B8355_uncultured soil bacterium	Copiotroph	0	0	0	0	0	0	0	0	0	0	0	0	0	0.000102388	1.40911e-05	0	0	0	0	0	0	0	5.44838e-05	0	0	0	0	0
FR687416.1.1486	Bacteria	Proteobacteria	Gammaproteobacteria	Betaproteobacteriales	SC-I-84	uncultured organism	uncultured organism	B119_uncultured organism	Copiotroph	0.000529895	0	0.00203961	0.000513454	0	0	0.000398409	0.000121384	0.00415649	0.00540817	0.00185334	0.00271346	0.00135715	0.00119392	0.00244622	0.00165165	0.000186215	0.000525997	0.00799113	0.00568613	0.000346364	0	0.000865203	0.00180108	0.00192114	0.000364779	0.000393334	0.000151212
FR687483.1.1495	Bacteria	Proteobacteria	Gammaproteobacteria	Betaproteobacteriales	SC-I-84	#N/A	#N/A	B63_f_SC-I-84	Copiotroph	0	0	0	0	0.000510978	0	0	0	0.00371232	0.00367735	0.0044409	0.00411547	0.00523474	0.00573921	0.00480508	0.00518899	0	0.00224744	0.00697517	0.00816739	0	0	0	0.00126761	0.00349557	0.00238209	0	0
FR687562.1.1458	Bacteria	Acidobacteria	Acidobacteriia	Solibacterales	Solibacteraceae (Subgroup 3)	Bryobacter	uncultured bacterium	B2165_Bryobacter	Copiotroph	0	0	0	0	0	0	0	0	0.000378713	0	0	0	0	0	0.00076374	0	0	0	0.000212912	0.000482409	0	0	0	0	0	0	0	0
GQ021511.1.1353	Bacteria	Bacteroidetes	Bacteroidia	Sphingobacteriales	Sphingobacteriaceae	Pedobacter	#N/A	B548_Pedobacter	Copiotroph	0.00181378	0.000407526	0	0	0	0	0	0	0.00236812	0.000198867	0.000693816	0.000261619	0.000532041	0	0	0	0	0.000339279	0	0	0	0	0	0	0.00183174	8.48323e-05	0	0.00189761
GQ088387.1.1344	Bacteria	Bacteroidetes	Bacteroidia	Cytophagales	Hymenobacteraceae	Hymenobacter	#N/A	B4813_Hymenobacter	Copiotroph	0	4.65744e-05	0	0	0	0	3.94031e-05	0	4.67546e-05	0.000114601	7.84107e-05	0	2.25441e-05	5.66791e-05	0	0	0	0	0	0	0	0	3.48696e-05	0	0	0	0	0
GQ182503.1.1399	Bacteria	Bacteroidetes	Bacteroidia	Bacteroidales	Bacteroidetes vadinHA17	#N/A	#N/A	B3967_f_Bacteroidetes vadinHA17	Copiotroph	0	0	0	0	0	0	0	0	0	0	0.000185334	0.000373982	0	0	0	0	0	0	0	0	0	0	0	0	0	0	0	0
GQ264175.1.1407	Bacteria	Proteobacteria	Alphaproteobacteria	Caulobacterales	Caulobacteraceae	uncultured	uncultured eubacterium WD297	B1585_uncultured	Copiotroph	0	0	0	6.04063e-05	0	0	0.000341493	0	0.000165979	0.000390992	0.000180582	0.000139195	0.000112721	6.94776e-05	0	0.000178402	0	0.000154839	0	7.55075e-05	5.34827e-05	0	0.00016781	0	0	0	0.000239516	0
GQ264187.1.1462	Bacteria	Bacteroidetes	Bacteroidia	Cytophagales	Microscillaceae	Ohtaekwangia	metagenome	B6833_Ohtaekwangia	Copiotroph	0	0	0	0	0	0	0	0	0	0	2.13847e-05	0	0.000257003	0	0	0	0	0	0	0	0	0	0	0	0	0	0	0
GQ264508.1.1464	Bacteria	Bacteroidetes	Bacteroidia	Cytophagales	Microscillaceae	uncultured	#N/A	B3896_uncultured	Copiotroph	0	0	0	0	0	0	0	0	0	0	0	0.000191183	0	0	7.32739e-05	0	0	0	0.000393424	0	0	0	0	0	0	0	0	0
GQ342356.1.1459	Bacteria	Planctomycetes	Phycisphaerae	MSBL9	SG8-4	uncultured planctomycete	uncultured planctomycete	B1945_uncultured planctomycete	Copiotroph	0	0	0	0	0.000114612	0	0	0	0.000215071	0	0.00018771	0.000357211	0.000137519	0.000263283	0	0	0	0.000152562	0.000187455	0.00014682	0	0	0	0	0	0	0	0
GQ369053.1.1260	Bacteria	Actinobacteria	Actinobacteria	Micrococcales	Intrasporangiaceae	Terrabacter	#N/A	B6_Terrabacter	Copiotroph	0.00909458	0.00467491	0.0110995	0.00472302	0.00725875	0.00497396	0.0065628	0.00453166	0.0114525	0.00740526	0.00946631	0.00404168	0.00439159	0.00214101	0.00623674	0.0033551	0.00325876	0.00799014	0.0112288	0.00886374	0.00101872	0.00144366	0.00856485	0.00407853	0.00736184	0.00334748	0.00461234	0.00484518
GQ402705.1.1458	Bacteria	Verrucomicrobia	Verrucomicrobiae	Pedosphaerales	Pedosphaeraceae	uncultured Desulfovibrio sp.	uncultured Desulfovibrio sp.	B8864_uncultured Desulfovibrio sp.	Copiotroph	0	0	0	0	0	0	0	0	0	0	6.65303e-05	0	0.000110466	0	0	0	0	0	0	0	0	0	0	0	0	0	0	0
GQ472319.1.1498	Bacteria	Proteobacteria	Gammaproteobacteria	Betaproteobacteriales	Hydrogenophilaceae	Thiobacillus	#N/A	B2116_Thiobacillus	Copiotroph	0	0	0	0	4.05917e-05	0	0	0	0	0	0.000216223	0	0	0	0	0	0	0	0	0	0	0	0.00123351	4.89424e-05	0.000152645	0	0	0
GU127722.1.1464	Bacteria	Proteobacteria	Gammaproteobacteria	Betaproteobacteriales	Gallionellaceae	#N/A	#N/A	B89_f_Gallionellaceae	Copiotroph	0.00021009	0.000143605	0.0020799	0.000809822	0.000274591	0.000725179	0.00205772	0.0001874	0.0020011	0.0024673	0	0.000194538	0.00418419	0.00354884	0.00753312	0.00758878	0.00204215	0.0015871	0.00103447	0.00569242	0.000494079	0.00198817	0.00124441	0.000606885	0.000161367	0.00084493	0.00550008	0
GU127742.1.1455	Bacteria	Planctomycetes	Planctomycetacia	Pirellulales	Pirellulaceae	#N/A	#N/A	B4474_f_Pirellulaceae	Copiotroph	0	0	0	0	0	0	0	0	0.000229098	0	0	0	0.000220932	0	0	0	0	0	0.000120341	0	0	0	0	0	0	0	0	0
GU208211.1.1437	Bacteria	Chloroflexi	Anaerolineae	Anaerolineales	Anaerolineaceae	uncultured	uncultured prokaryote	B5442_uncultured	Copiotroph	0	0	0	0	0	0	0	0	0	0	9.97954e-05	0.000234787	0	0	0	0	0	0	0	0	0	0	0	0	0	0	0	0
GU208216.1.1527	Bacteria	Proteobacteria	Gammaproteobacteria	Betaproteobacteriales	Hydrogenophilaceae	Thiobacillus	#N/A	B543_Thiobacillus	Copiotroph	0	0	0	0	0	0	0.0028414	0	0	0	0	0	0.00404892	8.59328e-05	0.00079474	0	0	0	0	0.000799121	0	0.00123775	0.000549197	0	0.000412141	0	0	0
GU208506.1.1428	Bacteria	Acidobacteria	Aminicenantia	Aminicenantales	uncultured prokaryote	uncultured prokaryote	uncultured prokaryote	B934_uncultured prokaryote	Copiotroph	0	0	0.00012842	0	7.87956e-05	2.55731e-05	4.81593e-05	0	0.000144939	0.000220776	0.000311267	0.000340441	0.000502733	0.000237686	0.000101456	0	0	0	0.000363338	0.000234912	0.00032599	0.000244804	0.00010243	0.000158247	0.000176632	0.000227351	7.91063e-05	0.000900884
GU389505.1.1227	Bacteria	Chloroflexi	Anaerolineae	SBR1031	metagenome	metagenome	metagenome	B860_metagenome	Copiotroph	0	0	0	0	7.64079e-05	8.40258e-05	0.000166369	0.000159715	0.000203383	0.000123028	0.000213847	0.000358888	0.000624472	0.000382127	0.000496008	0.000640711	0.000235872	0	4.39709e-05	0	0.000338724	0.00080076	0	0	0	0	0.000243911	0.000472804
GU472730.1.1418	Bacteria	Chloroflexi	Dehalococcoidia	vadinBA26	uncultured Caldilineaceae bacterium	uncultured Caldilineaceae bacterium	uncultured Caldilineaceae bacterium	B5077_uncultured Caldilineaceae bacterium	Copiotroph	0.00012372	0	0	0	0	0	5.69156e-05	0	6.54565e-05	0	9.97954e-05	0	6.53779e-05	0	6.76375e-05	0	0	0	0	0	0	0	0	0	0	0	0	0
GU983332.1.1357	Bacteria	Acidobacteria	Acidobacteriia	Solibacterales	Solibacteraceae (Subgroup 3)	Bryobacter	uncultured Acidobacteriales bacterium	B599_Bryobacter	Copiotroph	0.000791341	0.000362893	0.000168709	0.00090987	0	0	0	0.000468499	0.000864961	0.00150667	0.000420566	0.000690944	0	0	0	0	0	0.000195826	0.00116407	0.000350271	0	0	0	0	0.000152645	0.000132338	0.000307636	0
HE589845.1.1475	Bacteria	Proteobacteria	Deltaproteobacteria	Desulfuromonadales	Geobacteraceae	Geobacter	uncultured Desulfuromonadales bacterium	B70_Geobacter	Copiotroph	0.00172041	0	0	0.00117415	0.00101479	0	0	0	0.00337101	0.00338748	0.00277289	0.00589315	0.00435777	0.0045325	0.00642556	0.00156341	0.002367	0	0.0026938	0.00387605	0.00135999	0.00107302	0.00449382	0.0048975	0.00075014	0.000732951	0.000982236	0
HE974826.1.1460	Bacteria	Proteobacteria	Alphaproteobacteria	Rhodospirillales	Rhodopirillaceae	Defluviicoccus	uncultured Defluviicoccus sp.	B29_Defluviicoccus	Copiotroph	0.000196084	6.01587e-05	8.05773e-05	0	0.000527692	0.0010485	6.56718e-05	0.000129902	0.0115063	0.00921697	0.0241647	0.0163009	0.000845404	0.0011994	0.000707375	0.000347212	0.000157248	0.000341556	0.00529039	0.00503803	0.00459442	0.00416166	0	6.85193e-05	0.000154825	7.12591e-05	0	0
HE974849.1.1525	Bacteria	Proteobacteria	Deltaproteobacteria	Syntrophobacterales	Syntrophaceae	uncultured	uncultured delta proteobacterium	B66_uncultured	Copiotroph	0.000980422	0.001601	0.000208997	0.000675796	0.000229224	0.00345419	0.00187821	0.00150346	0.003191	0.0043835	0.0032481	0.00292813	0.00405118	0.00562951	0.00280695	0.00395744	0.000989007	0.000890324	0.00371438	0.00276441	0.00192029	0.000558244	0.00100032	0.0011061	0.00237036	0.00353072	0	0
HG005283.1.1516	Bacteria	Proteobacteria	Deltaproteobacteria	Desulfuromonadales	Geobacteraceae	Geobacter	#N/A	B1150_Geobacter	Copiotroph	0	0	0	0	0	0	0	0	0.000383388	0	0	0.000441064	0.000437356	0.000649067	0	0	0	0	0	0.000977402	0	0	0.000590604	0	0	0.000125552	0	0
HG917253.1.1486	Bacteria	Actinobacteria	Actinobacteria	Frankiales	Geodermatophilaceae	Blastococcus	#N/A	B657_Blastococcus	Copiotroph	0	0	0.00061692	0	0	0	0	0.00013842	0.000963146	0.000534244	0.00241885	0.000474604	0.000376487	0	0.00031846	0	0	0.000489564	0.00102059	0.000658593	0	0	0	0	0.000285664	0	0	0.000127785
HL098929.1.1495	Bacteria	Bacteroidetes	Bacteroidia	Chitinophagales	Chitinophagaceae	Flavisolibacter	unidentified	B220_Flavisolibacter	Copiotroph	0	0.000485151	0	0	0.000568284	0.000591834	0	0.000129902	0.0030297	0.000898271	0.00541984	0.00277216	0.00107535	0.00013347	0	0.000830622	0.000229665	0	0.000337882	0	0	0	0.00146017	0.000934799	0.00176632	0.00175433	0	0.00273886
HM186135.1.1289	Bacteria	Actinobacteria	Actinobacteria	Corynebacteriales	Mycobacteriaceae	Mycobacterium	#N/A	B2212_Mycobacterium	Copiotroph	0	0	0	0	0	0	0	0	0	0	0	0	0.000315617	0.00108787	0	0	0	0	0	0	0	0	0	0	0	0	0	0
HM204915.1.1472	Bacteria	Bacteroidetes	Bacteroidia	Sphingobacteriales	Sphingobacteriaceae	Mucilaginibacter	#N/A	B2713_Mucilaginibacter	Copiotroph	0	0	0	0	0	0	0	0	0.000308581	0	0.000449079	0	0.000180353	0	0	0	0	0	0	0	0	0	0	0	0.000309651	0	0	0
HM243795.1.1518	Bacteria	Verrucomicrobia	Verrucomicrobiae	Pedosphaerales	Pedosphaeraceae	ADurb.Bin063-1	#N/A	B698_ADurb.Bin063-1	Copiotroph	0	0	0	0	0	0	0	0	0.000109873	5.22447e-05	0	0.00118735	0	0.00015541	8.17286e-05	0	0	0.00038482	0	0	0.000458424	0.000523926	0.00087392	0.00123987	0	0	0.000217542	0.00159731
HM243806.1.1528	Bacteria	Proteobacteria	Deltaproteobacteria	Sva0485	#N/A	#N/A	#N/A	B36_o_Sva0485	Copiotroph	0.00075866	0.00148844	0.00070757	0.00243324	0.00132281	0.00413918	0.000656718	0	0.00507755	0.00547389	0.00492086	0.00539339	0.00368371	0.00674847	0.00594364	0.00491467	0.00142972	0.0030057	0.00401292	0.00394736	0.00336432	0.00457806	0.000156913	0.00069335	0.00095512	0.00320497	0.00127449	0.000383355
HM243889.1.1474	Bacteria	Bacteroidetes	Bacteroidia	Bacteroidales	Prolixibacteraceae	uncultured	uncultured soil bacterium	B154_uncultured	Copiotroph	0.000943073	0.00143993	0.00146298	0.00158378	0.00175261	0.00238925	0.00199423	0.00213593	0.00226526	0.00245381	0.00136149	0.00209463	0.00110917	0.00113358	0.0011752	0.00110494	0.000713823	0.000480456	0.00207589	0.00139899	0.000845537	0.00103641	0.000523044	0.000176192	9.81288e-05	0.00027825	9.66854e-05	0.000549475
HM262836.1.1306	Bacteria	Proteobacteria	Alphaproteobacteria	Sphingomonadales	Sphingomonadaceae	Sphingomonas	#N/A	B1711_Sphingomonas	Copiotroph	0	0	0	0	0	0	0	0	0	0	0.00124507	0	0	0	0	0	0	0	0	0	0	0	0.00104609	0	0	0	0	0
HM263358.1.1354	Bacteria	Bacteroidetes	Bacteroidia	Sphingobacteriales	NS11-12 marine group	uncultured Cytophagales bacterium	uncultured Cytophagales bacterium	B17339_uncultured Cytophagales bacterium	Copiotroph	0	0	0	0	0	0	0	0	0	1.17972e-05	1.42565e-05	0	0	0	0	0	0	0	0	0	0	0	0	0	0	0	0	0
HM263422.1.1345	Bacteria	Actinobacteria	Actinobacteria	Propionibacteriales	Nocardioidaceae	#N/A	#N/A	B40_f_Nocardioidaceae	Copiotroph	0.000504217	0.000506497	0	0	0.00141355	0.00319115	0	0	0.00572978	0.00670417	0.00581902	0.00569525	0	0	0.00047628	0	0.00732031	0.000373435	0.00146261	0.00126895	0.000201197	0	0.00820308	0.0046381	0.00690173	0.00310995	0.000239516	0.0120203
HM268978.1.1338	Bacteria	Planctomycetes	Planctomycetacia	Gemmatales	Gemmataceae	Gemmata	uncultured planctomycete	B6863_Gemmata	Copiotroph	0	0	5.28789e-05	0	0	0	5.03484e-05	0	1.40264e-05	6.06712e-05	0	0	1.35265e-05	0	0	3.2611e-05	0	0	0	0	0	0	2.83316e-05	0	0	0	0	0
HM269924.1.1341	Bacteria	Planctomycetes	Planctomycetacia	Isosphaerales	Isosphaeraceae	#N/A	#N/A	B3514_f_Isosphaeraceae	Copiotroph	0	0	0	0	0	0	0	0	0	0.00013314	0.000327899	0	0	0	0.000408643	0	0	0	0	0	0	0	0	0	0	0	0	0
HM270023.1.1366	Bacteria	Actinobacteria	Thermoleophilia	Gaiellales	uncultured	#N/A	#N/A	B141_f_uncultured	Copiotroph	0.00031747	0.000737429	0.00200436	0	0.00102434	0.000264864	0.000604181	0.00301756	0.0053651	0.00531884	0.00480919	0.00238308	0.00062898	0	0.000583373	0.000228277	0.000380706	0	0.00324459	0.00264486	0.000634153	0	0.00183719	0.00119746	0.000296567	0.000454701	0	0
HM270061.1.1366	Bacteria	Actinobacteria	Thermoleophilia	Solirubrobacterales	Solirubrobacteraceae	Conexibacter	Solirubrobacterales bacterium	B399_Conexibacter	Copiotroph	0.00049488	0.000415289	0	0	0.000238775	0.000104119	0	0	0.00176733	0.0024555	0.00168227	0.00183301	0	0	0	0	0.000333117	0.0010315	0.00107382	0.000551624	0.000152808	0	0	0.000401327	0.000638927	0	0	0
HM270081.1.1340	Bacteria	Verrucomicrobia	Verrucomicrobiae	Chthoniobacterales	Chthoniobacteraceae	#N/A	#N/A	B15449_f_Chthoniobacteraceae	Copiotroph	0	0	0	0	0	0	0	0	7.0132e-06	1.17972e-05	1.66326e-05	0	0	0	0	0	0	0	6.94277e-06	0	0	0	0	0	0	0	0	0
HM270165.1.1354	Bacteria	Proteobacteria	Gammaproteobacteria	Betaproteobacteriales	SC-I-84	#N/A	#N/A	B25_f_SC-I-84	Copiotroph	0.00403607	0.00331843	0.00672569	0.00636909	0.00336911	0.00225408	0.00486409	0.00447416	0.00474326	0.00334871	0.000425319	0.000410877	0.00714873	0.00582515	0.00833632	0.00627283	0	0.00247287	0.00414484	0.00440251	0.00310709	0.00652962	0.000455485	0.000593834	0	0	0.005065	0
HM274453.1.1340	Bacteria	Actinobacteria	Actinobacteria	Frankiales	Geodermatophilaceae	Geodermatophilus	#N/A	B776_Geodermatophilus	Copiotroph	0.000184413	0	0.000317273	0	0	0	0	0	0.000776127	0.00161453	0.00154208	0.000273359	0.000232204	0.000173694	0.00069892	0	0	0	0.000192083	0.000446753	0	0	0	0	0	0	0	0
HM278148.1.1308	Bacteria	Proteobacteria	Alphaproteobacteria	Acetobacterales	Acetobacteraceae	uncultured	#N/A	B4999_uncultured	Copiotroph	0	0	0	0	0	0	0	0	5.37678e-05	0	0.000192463	0	0	5.66791e-05	0	0	0	0	0	6.29229e-05	0	9.60911e-05	0	0	0	0	0	0
HM282179.1.1342	Bacteria	Bacteroidetes	Bacteroidia	Cytophagales	Hymenobacteraceae	Hymenobacter	Hymenobacter sp. TAPP3	B7225_Hymenobacter	Copiotroph	0	0	0	0	0	0	0	0	0.000236111	0	0	1.84475e-05	0	0	0	0	0	0	0	0	0	0	0	0	0	0	0	0
HM295026.1.1343	Bacteria	Fibrobacteres	Fibrobacteria	Fibrobacterales	Fibrobacteraceae	uncultured	uncultured bacterium	B17690_uncultured	Copiotroph	0	0	0	0	0	0	0	0	7.0132e-06	0	0	0	2.02897e-05	0	0	0	0	0	0	0	0	0	0	0	0	0	0	0
HM306174.1.1334	Bacteria	Actinobacteria	Actinobacteria	Frankiales	Acidothermaceae	Acidothermus	uncultured actinobacterium	B2752_Acidothermus	Copiotroph	0	0	0	0	0	0	0	0	0	0	0	0	0.000719157	0.000181007	0.000211367	0	0	0	0	0	0	0	0	0	0	0	8.78959e-05	0
HM330611.1.1308	Bacteria	Chloroflexi	TK10	#N/A	#N/A	#N/A	#N/A	B4799_o_NA	Copiotroph	0	0	0	0	0	0	0	0	4.67546e-05	0	9.50433e-05	0	0.00018937	0	0	0	3.31048e-05	0	0.00014117	0	0	0	0	0	0	0	0	0
HM330932.1.1386	Bacteria	Verrucomicrobia	Verrucomicrobiae	Pedosphaerales	Pedosphaeraceae	ADurb.Bin063-1	#N/A	B2266_ADurb.Bin063-1	Copiotroph	0	0	0	0	0	0	0	0	0	0	0	0	0.000789044	0	0.00100329	0	0	0	0	0	0	0	0	0	0	0	0	0
HM332313.1.1320	Bacteria	Acidobacteria	Acidobacteriia	Solibacterales	Solibacteraceae (Subgroup 3)	Bryobacter	uncultured Solibacteraceae bacterium	B288_Bryobacter	Copiotroph	0	0.000768478	0.00134212	0.00285609	0	0	0.000923783	0	0.000551705	0.00305379	0.000529866	0.000622185	0.000299837	0.000948918	0.000501644	0.00112604	0	0.00026186	0.00185141	0.000297835	0	0.000235652	0.000869561	0.00162815	0	0	0.000204358	0
HM335016.1.1335	Bacteria	Actinobacteria	Actinobacteria	Frankiales	uncultured	#N/A	#N/A	B398_f_uncultured	Copiotroph	0.000389834	0	0.000858652	0.000602175	0	0	0	0	0.00243592	0.00402958	0	0.00150096	0	0.000182836	0	0	0	0	0.000428138	0	0	0.000482744	0.00117249	0	0.000523354	0	0	0.000238532
HM341106.1.1371	Bacteria	Proteobacteria	Deltaproteobacteria	Myxococcales	Haliangiaceae	Haliangium	#N/A	B190_Haliangium	Copiotroph	0	0	0	0	0	0	0.00116239	0.000623955	0	0	0.000893407	0.000942501	0.00202446	0.00376824	0.000608737	0.00525229	0	0.000671728	0.00158527	0.00388234	0.000636699	0.00164499	0	0.00304421	0	0.000739738	0.000560336	0
HM341157.1.1356	Bacteria	Proteobacteria	Gammaproteobacteria	Betaproteobacteriales	Burkholderiaceae	#N/A	#N/A	B862_f_Burkholderiaceae	Copiotroph	0	0	0	0	0	0	0	0	0	0.000192126	0.000613029	0	0.000417066	0.000700261	0	0.000811439	0	0	0.00172875	0	0	0	0.0003378	0.000587308	0	0	0	0
HM362553.1.1458	Bacteria	Proteobacteria	Gammaproteobacteria	Methylococcales	Methylococcaceae	Methylocaldum	uncultured bacterium	B13818_Methylocaldum	Copiotroph	0	0	0	0	0	0	0	0	2.33773e-05	0	4.27695e-05	0	0	0	0	0	0	0	0	0	0	0	0	0	0	0	0	0
HM366479.1.1491	Bacteria	Bacteroidetes	Bacteroidia	Chitinophagales	Chitinophagaceae	Flavisolibacter	#N/A	B1528_Flavisolibacter	Copiotroph	0	0	0	0	0	0	0	0	0	0.00128252	0.000475216	0	0	0	0	0	0	0	0	0	0	0	0.000551376	0	0	0	0	0
HM366508.1.1467	Bacteria	Proteobacteria	Alphaproteobacteria	Elsterales	uncultured	#N/A	#N/A	B1014_f_uncultured	Copiotroph	0	0	0	0	0.000159979	0	0	0	0	0.000476943	0.000213847	0.000784858	0.000112721	0.0003675	0.000228276	0.000412434	9.10383e-05	0	0.000273082	0	0.000272507	0.000510198	0	0.000218609	0	0	0	5.75032e-05
HM440304.1.1418	Bacteria	Chloroflexi	Anaerolineae	SJA-15	metagenome	metagenome	metagenome	B189_metagenome	Copiotroph	0.000541566	0.000523963	0.00154104	0.00188203	0	0	0.00128279	0.00064951	0.00107068	0.00444922	0.00185334	0.00146574	0.00103703	0.0014956	0.00141193	0.00210821	0.000672442	0.000778749	0.00135847	0.00036705	0.000468611	0.000539941	0.00084123	0.000283866	0	0.000612489	0.00144589	0
HM445066.1.1382	Bacteria	Proteobacteria	Deltaproteobacteria	MBNT15	#N/A	#N/A	#N/A	B718_o_MBNT15	Copiotroph	0	0	0.000564041	0	0	0	0	0.00046424	0.000972497	0	0	0	0.00101899	0.00206422	0	0.00105506	0	0	0	0.000354466	0	0.00047588	0	0	0	0	0	0
HM445220.1.1353	Bacteria	Bacteroidetes	Bacteroidia	Sphingobacteriales	AKYH767	uncultured Bacteroidetes bacterium	uncultured Bacteroidetes bacterium	B9052_uncultured Bacteroidetes bacterium	Copiotroph	0	0	0	0	0	0	0	0	0.000172992	0	0	0	0	0	0	0	0	0	0	0	0	0	0	0	0	0	0	0
HM445502.1.1365	Bacteria	Proteobacteria	Gammaproteobacteria	Diplorickettsiales	Diplorickettsiaceae	Aquicella	#N/A	B3250_Aquicella	Copiotroph	0	0	0	0	0	0	0	0	5.37678e-05	0	3.08891e-05	0	0	0	0	0	0	0	0.00015737	0	0	0.00019447	0.00047074	0	0	0	0	0
HQ010189.1.1326	Bacteria	Acidobacteria	Holophagae	Holophagales	Holophagaceae	#N/A	#N/A	B6281_f_Holophagaceae	Copiotroph	0	0	0	0	0	0	0	0	0	0	0.000106924	0	7.89044e-05	0	0	0	0	0	0	0	0	0.000144137	0	0	0	0	0	0
HQ114125.1.1472	Bacteria	Gemmatimonadetes	Gemmatimonadetes	Gemmatimonadales	Gemmatimonadaceae	uncultured	#N/A	B690_uncultured	Copiotroph	0	0	0	0	0.000460835	0	0	0	0.000893014	0.000728055	0.000712824	0.000310254	0.00113848	0.000321791	0.000124002	0.000734707	0.000384844	0	0.000155055	0	0.000466064	0	0.000156913	0.000137039	0.000115574	0	0	0.000617627
HQ119025.1.1432	Bacteria	Proteobacteria	Alphaproteobacteria	Rhizobiales	Xanthobacteraceae	Pseudolabrys	#N/A	B140_Pseudolabrys	Copiotroph	0.00204721	0.000320199	0.0028328	0.00081171	0	0.00124577	0	0.000338597	0.00426636	0.00279762	0.00324573	0.00128126	0.0027098	0.0010897	0.00291687	0.000903517	0.000759342	0.00180342	0.00407309	0.000956428	0.000435502	0.000857957	0.00244305	0.000106042	0.000719611	0	0.000806445	0
HQ119420.1.1526	Bacteria	Proteobacteria	Deltaproteobacteria	Oligoflexales	0319-6G20	#N/A	#N/A	B4170_f_0319-6G20	Copiotroph	0	0	0	0	0	0	0	0	0	0	0.000135437	0.000112362	0	0	0	0.000103588	0	0	0	0	7.13103e-05	0	0.000156913	0	0	0	0	0
HQ121088.1.1458	Bacteria	Proteobacteria	Alphaproteobacteria	Sphingomonadales	Sphingomonadaceae	Sphingomonas	#N/A	B228_Sphingomonas	Copiotroph	0.00156868	0	0.00135219	0	0.00115806	0	0	0	0.00321906	0.000149993	0.00633226	0	0	0	0.00507845	0	0.000604163	0.000535105	0.00129367	0.00266793	0.000374379	0.000407243	0.00234716	0	0	0	0	0.000696428
HQ190288.1.1511	Bacteria	Proteobacteria	Gammaproteobacteria	Diplorickettsiales	Diplorickettsiaceae	Aquicella	#N/A	B10406_Aquicella	Copiotroph	0	0	0	0	0	0	0	0	0	4.21328e-05	0	5.19885e-05	0	0	0	0	0	0	0	0	0	0	0	0	0	0	0	0
HQ330550.1.1414	Bacteria	Acidobacteria	Subgroup 6	#N/A	#N/A	#N/A	#N/A	B293_o_NA	Copiotroph	0	0	0.0010752	0	0	0.00157822	0	0.000809225	0	0.00759907	0	0	0	0	0.00178394	0	0	0.00160076	0	0.00318809	0	0	0.000383566	0	0	0	0	0
HQ330569.1.1357	Bacteria	Bacteroidetes	Bacteroidia	Bacteroidales	Bacteroidetes vadinHA17	uncultured Alkaliflexus sp.	uncultured Alkaliflexus sp.	B44_uncultured Alkaliflexus sp.	Copiotroph	0.00484142	0.00444204	0.00387527	0.00252763	0.000682895	0.00120193	0.00528877	0.00231907	0.00345751	0.00328467	0.00267784	0.00196047	0.00383701	0.00432772	0.00180367	0.00345677	0.00120212	0.00191499	0.00137467	0	0.00396791	0.00269513	0.00426063	0.00324977	0.00105543	0.00130811	0.00359055	0.00207012
HQ330575.1.1385	Bacteria	Acidobacteria	Aminicenantia	Aminicenantales	uncultured prokaryote	uncultured prokaryote	uncultured prokaryote	B1115_uncultured prokaryote	Copiotroph	0	0	0	0	0.000212509	0	0	0	0.000878987	0.00112916	0.000377797	0	0	0	0	0.000297336	0	0	0	0	0.000481345	0.000343183	0	0	0	0	0	0.000183158
HQ330587.1.1367	Bacteria	Bacteroidetes	Bacteroidia	Bacteroidales	Bacteroidetes vadinHA17	uncultured prokaryote	uncultured prokaryote	B344_uncultured prokaryote	Copiotroph	0	0.000626814	0.000173745	0.000247288	0	0	0.000155423	0.00114143	0.000345984	0.0013314	0.00040631	0.00181289	0.000637998	0.00175157	0.000290277	0.00106465	0	0.000143454	0.00021754	0.000283153	0	0.000331743	0.000629833	0.00129697	0	0.00149984	0	0
HQ330636.1.1398	Bacteria	Acidobacteria	Acidobacteriia	Subgroup 13	uncultured Acidobacteria bacterium	uncultured Acidobacteria bacterium	uncultured Acidobacteria bacterium	B5123_uncultured Acidobacteria bacterium	Copiotroph	0	0	0	0	0	0	0	0	0	0	0.00016395	0	0.000157809	0	0	0	0	0	0	0	0.000152808	0	0	0	0	0	0	0
HQ330648.1.1374	Bacteria	Planctomycetes	Phycisphaerae	MSBL9	SG8-4	#N/A	#N/A	B2020_f_SG8-4	Copiotroph	0	0	0	0	0	0	0	0	0	0	0.000266121	0.00100958	0	0	0	0	0.000144834	0	0	0	0	7.09244e-05	0	0	0	0	0	0
HQ377322.1.1290	Bacteria	Bacteroidetes	Bacteroidia	Flavobacteriales	Weeksellaceae	Chryseobacterium	#N/A	B8745_Chryseobacterium	Copiotroph	0	0	0	0	0	0	0	0	0	9.60628e-05	0	0	4.50882e-06	0	0	0	0	0	0	1.4682e-05	0	0	2.83316e-05	0	0	0	0	0
HQ462515.1.1309	Bacteria	Proteobacteria	Deltaproteobacteria	Desulfuromonadales	Geobacteraceae	Geobacter	uncultured Desulfuromonadales bacterium	B114_Geobacter	Copiotroph	0.00185813	0.00196971	0.00508896	0.00527234	0.000353386	0	0	0	0.000533003	0.00125387	0.00199353	0.00105822	0.00191174	0.00133104	0.00305496	0.00412434	0.00303116	0.00621861	0	0	0.00119954	0.00233822	0.00033562	0.000611779	0.000508089	0	0	0.00425737
HQ597086.1.1507	Bacteria	Acidobacteria	Blastocatellia (Subgroup 4)	DS-100	#N/A	#N/A	#N/A	B1077_o_DS-100	Copiotroph	7.00301e-05	1.55248e-05	2.01443e-05	5.28555e-05	0.000403529	0.000166225	0.000146667	3.83317e-05	0.000105198	0.00018707	0.000270873	0.000214662	4.28338e-05	0	6.76375e-05	8.24867e-05	0.000161386	5.0095e-05	0.000404995	0.000585183	8.40443e-05	0.000153288	0.000289854	1.30513e-05	0.000187535	0.000103495	0.000184581	7.66709e-05
HQ597930.1.1458	Bacteria	Acidobacteria	Acidobacteriia	Solibacterales	Solibacteraceae (Subgroup 3)	Candidatus Solibacter	#N/A	B510_Candidatus Solibacter	Copiotroph	0	0.00016107	0	0.00023785	0.000644691	0	0	0.00037054	0.000511963	0.00102804	0.000534618	0.00147077	0	0.000738656	0.000298732	0	0	0.00110209	0.000328625	0.000320907	0	0.000285986	0.00123351	0.000256132	0.000152645	0	0.000153818	0.00050901
HQ691986.1.1407	Bacteria	Proteobacteria	Deltaproteobacteria	Desulfarculales	Desulfarculaceae	Desulfatiglans	uncultured soil bacterium	B5379_Desulfatiglans	Copiotroph	0	0	0	0	0	0	0	0	0	0	0.00023048	0	0	0	8.45468e-05	0	0	0	0.000134227	0	0	0	0	0	0	0	0	0
HQ698291.1.1217	Bacteria	Proteobacteria	Alphaproteobacteria	Rhizobiales	Xanthobacteraceae	#N/A	#N/A	B41_f_Xanthobacteraceae	Copiotroph	0.005432	0.000157189	0.00610122	0.000420956	0.00369862	0	0.00732679	0.000195918	0.00816804	0.000508964	0.00585229	9.89458e-05	0.00427662	0.000270597	0.00532081	0.000283908	0	0.00354991	0.00452669	0.00494574	0.00443143	0.00446595	0.00557914	0.000309968	0.00308779	0	0.00515949	0.00214679
HQ845896.1.1414	Bacteria	Proteobacteria	Deltaproteobacteria	Myxococcales	BIrii41	#N/A	#N/A	B4138_f_BIrii41	Copiotroph	0	0	0	0	0	0	0	0	0	0	0.000313643	0.000117393	0	0	0	0	0	0	0	0	0	0	0.000172169	0	0	0	0	0
JF130608.1.1376	Bacteria	Proteobacteria	Deltaproteobacteria	Myxococcales	Sandaracinaceae	Sandaracinus	#N/A	B7278_Sandaracinus	Copiotroph	4.90211e-05	0	0	0	0	0	0	0	0	0	0.000152069	4.19262e-05	0	0	0	0	0	0	0	0	0	0	0	0	0	0	0	0
JF145349.1.1309	Bacteria	Chloroflexi	TK10	#N/A	#N/A	#N/A	#N/A	B1298_o_NA	Copiotroph	8.40362e-05	0	0	0	0	7.30659e-05	0	0	0	0.000210664	0.000449079	0.000442741	0	3.65671e-05	0	0	0	0.00012296	0.000245311	0.000151015	0.00025468	0.000604002	0	0	0.000250774	0.000198508	0	0
JF174763.1.1350	Bacteria	Bacteroidetes	Bacteroidia	Sphingobacteriales	Sphingobacteriaceae	Pedobacter	#N/A	B3236_Pedobacter	Copiotroph	0	0	0	0	0	0	0	0	0	0.000583118	0	0	0.000142028	0	0	0	0	0	0	0	0	0	0	0	0	0	0	0
JF176932.1.1343	Bacteria	Bacteroidetes	Bacteroidia	Cytophagales	Spirosomaceae	Larkinella	#N/A	B7389_Larkinella	Copiotroph	3.50151e-05	0	0	0	5.25304e-05	0	0	0	6.0781e-05	0	2.13847e-05	0	0	0	0	0	0	1.82163e-05	2.54568e-05	0	0	0	0	0	0	0	0	3.4076e-05
JF181627.1.1305	Bacteria	Proteobacteria	Alphaproteobacteria	Rhizobiales	Rhodomicrobiaceae	Rhodomicrobium	#N/A	B2215_Rhodomicrobium	Copiotroph	0	0	0	0	0	0	3.94031e-05	0	0	0	0	0	0.000985177	0.000329104	0.000109911	0.000115098	0	0	0	0	0	0	0	0	0	0	0	0
JF185759.1.1370	Bacteria	Acidobacteria	Subgroup 6	#N/A	#N/A	#N/A	#N/A	B207_o_NA	Copiotroph	0	0	0	0	0	0	0.000299901	0.000344985	0.00154758	0.000692663	0.00266121	0.0023529	0	0.000210261	0	0.00153464	0.00257804	0	0.000580879	0	0.000855724	0.00155805	0.00350222	0.00197401	0.00167255	0.000727861	0.000316425	0.0030498
JF198782.1.1319	Bacteria	Chloroflexi	Ktedonobacteria	C0119	uncultured bacterium	uncultured bacterium	uncultured bacterium	B919_uncultured bacterium	Copiotroph	0.000200753	0.000124199	0.00011583	0.000207647	0.000155203	0	0	0.000121384	0.000187019	0.000453349	0.000330275	0.000144226	0.000674069	0.000433321	0.000160639	0.000335702	7.8624e-05	0	0	0.000174087	4.32956e-05	0.000105243	0.000217935	0.000305074	0	9.33156e-05	0.000226332	0
JF202198.1.1308	Bacteria	Proteobacteria	Alphaproteobacteria	Rhizobiales	Xanthobacteraceae	#N/A	#N/A	B138_f_Xanthobacteraceae	Copiotroph	0.00318871	0	0.00192378	0.000241625	0.00077363	0	0.00195702	0.000327949	0.00236111	0.000138196	0.000748466	0.000122424	0.00228146	0	0.00252513	0	0	0.00415788	0.00200646	0.00403126	0.00258755	0.00247778	0.00190693	0	0.00138035	0	0.00338399	0.00344806
JF228153.1.1347	Bacteria	Actinobacteria	Actinobacteria	Propionibacteriales	Nocardioidaceae	Nocardioides	#N/A	B2038_Nocardioides	Copiotroph	0	0	0.000211516	0	0	0	0	0	0	0.000433125	0.000263745	0.000231433	0	0	0	0	0	0	0	0	0	0	0.000475099	0	0	0	0	0
JF235770.1.1354	Bacteria	Proteobacteria	Gammaproteobacteria	Betaproteobacteriales	SC-I-84	#N/A	#N/A	B211_f_SC-I-84	Copiotroph	0.00116483	0.000415289	0.000596776	0.000218973	0.00112702	0.000157092	0.00184757	0.000264063	0.00213435	0.00328299	0.00154921	0.00221873	0.00123542	0.000444291	0	0.00145982	0.000382775	0.000305124	0.00113167	0.000213938	0.000517	0.000382077	0.000215756	0.000151721	0	0	0.00229848	0.0023768
JF266167.1.1382	Bacteria	Proteobacteria	Deltaproteobacteria	Desulfarculales	Desulfarculaceae	uncultured	#N/A	B393_uncultured	Copiotroph	0	0	0	0.000230299	0.000212509	0.00140652	0	0.000142679	0.000399752	0.000444922	0.00173216	0.00292477	0.000701122	0	0	0.000485329	0	0.000528274	0.000370281	0	0.00123265	0.00143679	0	0.000185981	0.000320554	0	0.000250503	0.000408912
JF309146.1.1417	Bacteria	Proteobacteria	Alphaproteobacteria	Sphingomonadales	Sphingomonadaceae	Sphingomonas	#N/A	B6390_Sphingomonas	Copiotroph	0	0	0	0	0	0	0	0	0.000324945	0	0	0	0	0	0	0	0	0	0	0	0	0	0	0	0	0	0	0
JF309164.1.1514	Bacteria	Proteobacteria	Deltaproteobacteria	Myxococcales	Archangiaceae	Anaeromyxobacter	Anaeromyxobacter dehalogenans	B1027_Anaeromyxobacter	Copiotroph	0	0	0	0	0	0	0	0	0	0	0	0	0.000511751	0.00111347	0	0.000301172	0	0.00078558	0	0	0	0	0	0.000305074	0	0	0	0.00118201
JF428979.1.1546	Bacteria	Verrucomicrobia	Verrucomicrobiae	Chthoniobacterales	Chthoniobacteraceae	Candidatus Udaeobacter	#N/A	B1666_Candidatus Udaeobacter	Copiotroph	0	0	0	0	0	0	0	0	0	0	0	0	0.00132785	0.00051194	0	0	0	0.000414422	0	0	0	0	0	0	0	0	0	0
JF429000.1.1537	Bacteria	Proteobacteria	Gammaproteobacteria	Xanthomonadales	Rhodanobacteraceae	#N/A	#N/A	B9_f_Rhodanobacteraceae	Copiotroph	0.00157101	0.00343293	0.00351015	0.00443798	0.000988527	0.00276737	0.00666788	0.0076344	0.00650825	0.00629127	0.00489473	0.00505798	0.00577129	0.00466597	0.00811086	0.00676391	0.00203388	0.00527136	0.00915752	0.00878194	0.00494843	0.00889758	0.00712212	0.00734462	0.00582231	0.0052104	0.0105497	0.00374836
JF429015.1.1469	Bacteria	Proteobacteria	Alphaproteobacteria	Dongiales	Dongiaceae	Dongia	#N/A	B8362_Dongia	Copiotroph	0	0	0	0	0	0	0	0	0	0	0	0	2.02897e-05	0	4.79099e-05	0	0	0	0.000138855	0	0	0	0	0	0	0	0	0
JF681657.1.1242	Bacteria	Firmicutes	Clostridia	Clostridiales	Clostridiaceae 1	Clostridium sensu stricto 13	#N/A	B5330_Clostridium sensu stricto 13	Copiotroph	0	0	0	0	0	0	0	0	0	0	0.000327899	0	0	0	0.000138093	0	0	0	0	0	0	0	0	0	0	0	0	0
JF703353.1.1412	Bacteria	Proteobacteria	Gammaproteobacteria	Ga0077536	metagenome	metagenome	metagenome	B11330_metagenome	Copiotroph	0	0	0	0	0	0	0	0	0	0	0	0	0	0	0	0	0	0	0	0	0	0	0.00010025	0	0	0	0	0
JF703651.1.1400	Bacteria	Bacteroidetes	Bacteroidia	Flavobacteriales	Flavobacteriaceae	Flavobacterium	#N/A	B6801_Flavobacterium	Copiotroph	0	0	0	0	0	0	0	0	0.000289879	0	0	0	0	0	0	0	0	0	0	0	0	0	0	0	0	0	0	0
JF710262.1.1491	Bacteria	Bacteroidetes	Bacteroidia	Chitinophagales	Chitinophagaceae	Chitinophaga	#N/A	B1164_Chitinophaga	Copiotroph	0.000119051	0	0	0.000268053	0	0	0	0	0.000348322	0	0.000320771	0	0	0	0	0	0	0	0.00120341	0.00156888	0	0	0	0	0	2.20564e-05	0	0
JF833535.1.1428	Bacteria	Proteobacteria	Gammaproteobacteria	Betaproteobacteriales	SC-I-84	uncultured Nitrosomonadaceae bacterium	uncultured Nitrosomonadaceae bacterium	B1808_uncultured Nitrosomonadaceae bacterium	Copiotroph	0	0	0	0	0	0	0	0	0	0	0	0	0.000685341	0.000475373	0	0.000354885	0	0	0.000259197	0.000165697	0	0	0	0	0	0	0	0
JF833593.1.1428	Bacteria	Actinobacteria	Actinobacteria	Corynebacteriales	Mycobacteriaceae	Mycobacterium	#N/A	B62_Mycobacterium	Copiotroph	0.00139127	0.00161458	0.00111046	0.000919308	0.00190303	0.00238743	0	0.000411001	0.00287775	0.00375319	0.00351898	0.00343962	0.00287663	0.00230739	0.00342696	0.00319204	0.000289667	0.00211082	0.00410549	0.00307903	0.00458933	0.00517062	0.000599322	0.000432324	0.00248811	0.00219716	0.000986631	0.00221281
JF915324.1.1380	Bacteria	Bacteroidetes	Bacteroidia	Flavobacteriales	Flavobacteriaceae	Flavobacterium	#N/A	B10663_Flavobacterium	Copiotroph	0	0	0	0	0	0	0	0	0	0	0	0	1.57809e-05	0	1.40911e-05	0	0	0	0	0	0	0	8.93534e-05	0	0	0	0	0
JF915334.1.1389	Bacteria	Bacteroidetes	Bacteroidia	Flavobacteriales	Weeksellaceae	Chryseobacterium	#N/A	B5661_Chryseobacterium	Copiotroph	0	0	0	0	0	0	0	0	0.000222085	0	0	0	0	0	9.01833e-05	0	0	0	0	9.01895e-05	0	0	0	0	0	0	0	0
JF922405.1.1509	Bacteria	Actinobacteria	Thermoleophilia	Gaiellales	uncultured	Gaiella sp. EBR4-RS1	Gaiella sp. EBR4-RS1	B9654_Gaiella sp. EBR4-RS1	Copiotroph	0	0	0	0	0	0	0	0	3.74037e-05	0	0	0	0	4.38806e-05	0	0	0	0	0	0	0	0	5.44838e-05	0	0	0	0	0
JF922471.1.1502	Bacteria	Proteobacteria	Deltaproteobacteria	Myxococcales	Haliangiaceae	Haliangium	#N/A	B2804_Haliangium	Copiotroph	0	0	0	0	0	0	0	0	0.000689631	0	0.000154445	0	0	0	0.000259277	0	0.000138627	0	0	0	0	0	0	0	0	0	0	0
JF951735.1.1403	Bacteria	Bacteroidetes	Bacteroidia	Flavobacteriales	Weeksellaceae	Chryseobacterium	#N/A	B7484_Chryseobacterium	Copiotroph	0	0	0	0	0	0	1.53234e-05	0	2.80528e-05	0	0.000128308	0	0	0	0	0	0	0	0	0	0	0	0	0	0	0	0	6.8152e-05
JF968470.1.1321	Bacteria	Proteobacteria	Gammaproteobacteria	Xanthomonadales	Rhodanobacteraceae	Rhodanobacter	#N/A	B1125_Rhodanobacter	Copiotroph	0	0	0.000166191	0	0	0.000257557	0	0	0.00211097	0.00104152	0	0	6.98867e-05	0	0	0	0	7.96965e-05	0	9.01895e-05	0	0	0	0	0	0	0	0
JN023804.1.1452	Bacteria	Acidobacteria	Acidobacteriia	Solibacterales	Solibacteraceae (Subgroup 3)	Candidatus Solibacter	#N/A	B2211_Candidatus Solibacter	Copiotroph	0	0	0	0	0	0	0	0	0.00083457	0	0	0	0	0	0	0	0	0	0	0	0	0	0.000825974	0	0	0	0	0
JN038797.1.1517	Bacteria	Acidobacteria	Subgroup 22	uncultured Acidobacteriales bacterium	uncultured Acidobacteriales bacterium	uncultured Acidobacteriales bacterium	uncultured Acidobacteriales bacterium	B1965_uncultured Acidobacteriales bacterium	Copiotroph	0	6.79211e-05	5.7915e-05	7.55079e-05	0	0	0	0	7.24697e-05	3.87622e-05	0	0.00014758	9.9194e-05	3.65671e-05	0.000386097	5.1794e-05	0.000132419	0.000236813	0	0.000151015	0	0.000180743	0	0	0	5.08994e-05	3.29609e-05	2.34272e-05
JN391817.1.1464	Bacteria	Planctomycetes	Planctomycetacia	Gemmatales	Gemmataceae	uncultured	uncultured bacterium	B10840_uncultured	Copiotroph	0	0	0	2.07647e-05	0	0	1.75125e-05	0	2.80528e-05	8.42656e-06	9.50433e-06	1.00623e-05	0	0	0	0	0	0	0	0	0	1.14394e-05	0	0	0	0	0	0
JN409136.1.1451	Bacteria	Proteobacteria	Gammaproteobacteria	Betaproteobacteriales	A21b	uncultured delta proteobacterium	uncultured delta proteobacterium	B891_uncultured delta proteobacterium	Copiotroph	0	0	0.000178781	0	0	0	0	0.00120319	0	0	0	0	0.00167052	0.000906865	0.000346642	0.000744299	0	0	0	0	0	0	0	0	0	0	0.000252701	0
JN417532.1.1488	Bacteria	Chloroflexi	Anaerolineae	SJA-15	uncultured soil bacterium	uncultured soil bacterium	uncultured soil bacterium	B19_uncultured soil bacterium	Copiotroph	0.000485542	0.0014671	0.00062951	0.00134026	0.00326882	0.00574298	0.00342369	0.0059116	0.00985354	0.00789232	0.00861805	0.00939985	0.000908527	0.00402239	0.00098638	0.00397471	0.00450226	0.00142998	0.00299928	0.00120392	0.00472176	0.00351419	0.00179361	0.00599544	0.000922411	0.00153716	0.000560336	0.00209141
JN540128.1.1449	Bacteria	Bacteroidetes	Bacteroidia	Bacteroidales	Bacteroidetes vadinHA17	uncultured Bacteroidales bacterium	uncultured Bacteroidales bacterium	B2459_uncultured Bacteroidales bacterium	Copiotroph	0	0	0	0	0	0	0	0	7.24697e-05	0	0.000140189	0.000226401	0	0	0	0	0	0	9.25703e-05	0.000245399	0	0	0.000361772	0.000120724	0	0	0	0
JN590576.1.1302	Bacteria	Proteobacteria	Gammaproteobacteria	Betaproteobacteriales	Burkholderiaceae	#N/A	#N/A	B285_f_Burkholderiaceae	Copiotroph	0	0	0.000402887	0.000200096	0.000140877	0.000535208	0.000674231	0	0.00452117	0.00326782	0.00156821	0.000796598	0	0.000162724	0.0012992	0.000268561	0	0.00050095	0.000865532	0.00189608	0	0	0.000945839	0.00100169	0	0	0.00116462	0
JN615876.1.1376	Bacteria	Acidobacteria	Subgroup 6	Unknown Order	Unknown Family	#N/A	#N/A	B2656_f_Unknown Family	Copiotroph	0	0	0	0	0	0	0	0	0	0.000481999	0.000646294	0	0	0	0	0	0	0	0	0	0	0	0	0	0	0	0	0
JN616201.1.1358	Bacteria	Acidobacteria	Subgroup 6	uncultured bacterium DA008	uncultured bacterium DA008	uncultured bacterium DA008	uncultured bacterium DA008	B1487_uncultured bacterium DA008	Copiotroph	0	0	0	0	0	0	0	0	0	0	0.0010336	0.00137015	0	0	0	0	0	0	0	0	0	0	0	0	0	0	0	0
JN626478.1.1357	Bacteria	Proteobacteria	Gammaproteobacteria	Betaproteobacteriales	Gallionellaceae	#N/A	#N/A	B165_f_Gallionellaceae	Copiotroph	0	0	0	0	0	0	0	0	0.00388297	0.00529188	0.00131635	0.00502947	0	0.000316306	0	0.00112988	0	0.00221784	0.00279331	0	0	0	0.000233191	0.00296917	0.000370709	0.00335257	0.00103937	0
JN672485.1.1315	Bacteria	Proteobacteria	Deltaproteobacteria	MBNT15	uncultured proteobacterium	uncultured proteobacterium	uncultured proteobacterium	B1888_uncultured proteobacterium	Copiotroph	0	0	0	0	0	0	0	0	0	0	0	0	0	0.000499142	0	0	0	0	0.000546165	0	0	0	0.00050343	0.000244712	0	0	0	0
JN679090.1.1504	Bacteria	Proteobacteria	Gammaproteobacteria	Cellvibrionales	Cellvibrionaceae	Cellvibrio	uncultured Cellvibrio sp.	B6423_Cellvibrio	Copiotroph	0	2.71684e-05	0	0	0	0	0	0	0	0	0	0	9.69396e-05	0	0	1.53464e-05	0	0.000129791	0	0	0	0	3.48696e-05	0	0	0	0	0
JN697978.1.1394	Bacteria	Firmicutes	Negativicutes	Selenomonadales	Veillonellaceae	Sporomusa	#N/A	B5108_Sporomusa	Copiotroph	0	0	0	0	0	0	0	0	0.000194032	0	0	6.70819e-05	1.12721e-05	0	0	0	0	0	0	3.56563e-05	0	0	0	0	0	9.33156e-05	0	0
JN867679.1.1345	Bacteria	Planctomycetes	Planctomycetacia	Isosphaerales	Isosphaeraceae	Aquisphaera	#N/A	B844_Aquisphaera	Copiotroph	0	0	0	0	0	0	0	0	9.5847e-05	0.000261223	0	0.000296837	0	0.00266392	0	0.00114139	0	0	0	0.000144723	0.000165542	0.000132697	0	0	0.000209341	0	0	0
JN869016.1.1515	Bacteria	Nitrospirae	Thermodesulfovibrionia	uncultured	uncultured bacterium	uncultured bacterium	uncultured bacterium	B2739_uncultured bacterium	Copiotroph	0	0	0	0	0	0	0	0	0	0.000276391	0	0.000625539	0	0	0	0	0	0	0	0	0	0	0	0	0	0	0	0
JQ086803.1.1484	Bacteria	Proteobacteria	Deltaproteobacteria	Syntrophobacterales	Syntrophaceae	uncultured	uncultured Smithella sp.	B315_uncultured	Copiotroph	0.000525226	0	0.000553969	0	0.00108881	0	0.00123463	0	0.00128108	0	0.00154445	0	0.000951361	0.000188321	0.00168812	0	0.000544161	0.00132069	0.00106456	0.000186671	0.00130905	0.00141162	0.000825974	0	0.000392515	0.000276553	0.00182164	0.00128424
JQ278770.1.1518	Bacteria	Acidobacteria	Subgroup 22	#N/A	#N/A	#N/A	#N/A	B6897_o_NA	Copiotroph	0	0	0	0	0	0	0	0	5.84433e-05	0	0	6.8759e-05	0	0	7.60921e-05	0	0	0	0	0	0	6.40608e-05	0	0	0	0	0	0
JQ278772.1.1501	Bacteria	Proteobacteria	Gammaproteobacteria	Betaproteobacteriales	Gallionellaceae	Candidatus Nitrotoga	#N/A	B2368_Candidatus Nitrotoga	Copiotroph	0	0	0	0	0	0	0	0	0	0	0	0	0.000284056	0.000983656	0	0	0	0	0	0	0	0	0	0	0	0	0	0
JQ278836.1.1519	Bacteria	Acidobacteria	Subgroup 22	#N/A	#N/A	#N/A	#N/A	B5195_o_NA	Copiotroph	0	0	0	0	0	0	0	0	2.57151e-05	0	0	0.000160997	0	3.47388e-05	0	0	0	0	0	2.51692e-05	3.8202e-05	9.60911e-05	0	0	0	0	0	0
JQ278936.1.1494	Bacteria	Proteobacteria	Gammaproteobacteria	Betaproteobacteriales	Gallionellaceae	#N/A	#N/A	B380_f_Gallionellaceae	Copiotroph	0	0	0	0	0	0	0	0	0.0026767	0	0.00613267	0.00455654	0	0	0	0	0	0	0.000768334	0	0.000384566	0.000169303	0	0	0	0	0	0
JQ427658.1.1503	Bacteria	Acidobacteria	Thermoanaerobaculia	Thermoanaerobaculales	Thermoanaerobaculaceae	Subgroup 10	uncultured Holophaga sp.	B6229_Subgroup 10	Copiotroph	0	0	0	0	0	0	0	0	9.35093e-06	4.21328e-05	9.50433e-05	0	0	0	2.81823e-05	0	2.06905e-05	0	1.38855e-05	7.55075e-05	0	0	0	0	0	2.3753e-05	0	0
JQ427842.1.1441	Bacteria	Proteobacteria	Alphaproteobacteria	Sphingomonadales	Sphingomonadaceae	Sphingomonas	#N/A	B703_Sphingomonas	Copiotroph	0	0	0	0	0	0	0	0	0.00052599	0.00209821	0.00183196	0.000945855	0	0	0	0.000212931	0	0	0.000178198	0.000253789	0	0	0	0.000316494	0	0.000251104	0	0
JQ428254.1.1439	Bacteria	Proteobacteria	Alphaproteobacteria	Sphingomonadales	Sphingomonadaceae	Sphingomonas	#N/A	B1231_Sphingomonas	Copiotroph	0	0	0	0	0	0	0	0	0.000736386	0.000722999	0.000425319	0.000419262	0	0	0	0	0	0	0.000145798	0.000652301	0	0	0	0.000122356	0	0	0	0
JQ655798.1.1466	Bacteria	Acidobacteria	Acidobacteriia	Acidobacteriales	#N/A	#N/A	#N/A	B2108_o_Acidobacteriales	Copiotroph	0	0	0	0	0	0	0	0	0	0	0.00167039	0	0	0	0	0	0	0	0	0	0	0	0	0	0	0	0	0.000159731
JQ668530.1.1567	Bacteria	Proteobacteria	Deltaproteobacteria	Syntrophobacterales	Syntrophaceae	Syntrophus	metagenome	B508_Syntrophus	Copiotroph	0	0	0	0	0	0	0	0	0.000523652	0.00122859	0.00100746	0.000945855	0.000712394	0.000725858	0.000442462	0.00156149	0	0.000979129	0	0.000333491	0.00132943	0.000482744	0.000414077	0	0	0	0	0
JQ769816.1.1484	Bacteria	Bacteroidetes	Bacteroidia	Sphingobacteriales	env.OPS 17	#N/A	#N/A	B11449_f_env.OPS 17	Copiotroph	0	0	0	0	0	0	0	0	0	0	4.75216e-05	4.19262e-05	0	0	0	0	0	0	0	0	0	0	0	0	0	0	0	0
JQ782930.1.1337	Bacteria	Actinobacteria	Actinobacteria	Micrococcales	Intrasporangiaceae	#N/A	#N/A	B229_f_Intrasporangiaceae	Copiotroph	0	0	0	0	0	0	0	0	0.0071558	0.00637385	0.00517273	0.00420939	0	0	0	0	0.000320703	0	0	0	0	0	0	0	0	0	0	0
JQ825014.1.1512	Bacteria	Acidobacteria	Subgroup 6	Unknown Order	Unknown Family	Vicinamibacter	uncultured bacterium	B2305_Vicinamibacter	Copiotroph	0	0	0	0	0	0	0	0	0	0.000685922	0.000667679	0	0	0	0	0	0	0	0	0	0	0	0	0	0	0	0	0
JX095678.1.1391	Bacteria	Bacteroidetes	Bacteroidia	Chitinophagales	Chitinophagaceae	Lacibacter	uncultured bacterium	B1586_Lacibacter	Copiotroph	0	0	0	0	0	0	0	0	9.11716e-05	0	0	0.000197892	5.18514e-05	0	0	0.000345293	0	0	0	0	0.000756399	0.00106387	0	0	0	0	4.39479e-05	0
JX097018.1.1439	Bacteria	Proteobacteria	Gammaproteobacteria	Betaproteobacteriales	Burkholderiaceae	Massilia	#N/A	B3799_Massilia	Copiotroph	0	0	0	0	0	0	0	0	0	0	0.000427695	0	0.000317872	0	0	0	0	0	0	0	0	0	0	0	0	0	0	0
JX133491.1.1511	Bacteria	Planctomycetes	Planctomycetacia	Gemmatales	Gemmataceae	uncultured	uncultured bacterium	B5697_uncultured	Copiotroph	0	0	9.06495e-05	0	0	0	0	0	0	0	0.000116428	0	0.000151045	0	0	0	0	0	3.70281e-05	0	0	0	0	0	0	0	0	0
JX133556.1.1470	Bacteria	Actinobacteria	Actinobacteria	Frankiales	#N/A	#N/A	#N/A	B204_o_Frankiales	Copiotroph	0	0	0	0	0	0	0	0	0.00101458	0.0015488	0.000482345	0.000385721	0.00222736	0.00588	0.00323532	0.00569926	0	0	0.000587821	0	0.00135744	0.00398778	0.000507789	0	0	0	0	0.000278997
JX221950.1.1393	Bacteria	Nitrospirae	Thermodesulfovibrionia	uncultured	uncultured Sphingobacteriales bacterium	uncultured Sphingobacteriales bacterium	uncultured Sphingobacteriales bacterium	B38_uncultured Sphingobacteriales bacterium	Copiotroph	0.000294127	0.00239276	0.00164176	0.00263711	0.00139206	0.00443693	0.00195483	0.0030708	0.00189356	0.00559186	0.0029012	0.00513512	0.00501381	0.00646507	0.00336496	0.00610018	0.00160145	0.00403492	0.00187918	0.00082429	0.00318859	0.00282325	0.0031666	0.00272772	0.000318373	0.0016678	0.000470243	0.000862548
JX222126.1.1446	Bacteria	Proteobacteria	Deltaproteobacteria	Syntrophobacterales	Syntrophaceae	Syntrophus	Syntrophobacterales bacterium RBG_19FT_COMBO_59_10	B4591_Syntrophus	Copiotroph	0	0	0	0	0	0	0	0	0.00055638	0	0	0	0	0	0	0	0	0	0	0	0	0	0	0	0	0	0	0
JX222398.1.1474	Bacteria	Proteobacteria	Gammaproteobacteria	Betaproteobacteriales	Burkholderiaceae	Janthinobacterium	#N/A	B634_Janthinobacterium	Copiotroph	0	0	0	0	0	0	0	0	0.000467546	0.00524132	0	0.00011907	0	0	0	0	0	0	0	0	0	0	0	0	0	0	0	0.00121822
JX222460.1.1253	Bacteria	Firmicutes	Clostridia	Clostridiales	Heliobacteriaceae	Hydrogenispora	#N/A	B2129_Hydrogenispora	Copiotroph	0	0	0	0	0	0	0	0	0.000201045	0	6.17781e-05	1.67705e-05	0.000193879	0	0.000138093	7.86501e-05	6.82787e-05	0.000368881	0.000148112	0	0.000160448	0.000107531	9.37121e-05	0	0	0	0.000129646	0
JX223408.1.1279	Bacteria	Firmicutes	Clostridia	Clostridiales	Clostridiaceae 1	Fervidicella	uncultured bacterium	B3176_Fervidicella	Copiotroph	0	0	0	0	0	5.66261e-05	0	4.68499e-05	4.44169e-05	0.000149993	0.0001093	0	3.60706e-05	0	0	0.000164973	0	0	0	5.03383e-05	0	0.000102955	9.80708e-05	0	0	0	0	0
JX224662.1.1518	Bacteria	Proteobacteria	Deltaproteobacteria	Desulfuromonadales	Desulfuromonadaceae	Pelobacter	#N/A	B8207_Pelobacter	Copiotroph	0	0	0	0	0	0	0	0	0	0	0.000128308	0	7.89044e-05	0	0	0	0	0	0	0	0	0	0	0	0	0	0	0
JX224672.1.1431	Bacteria	Proteobacteria	Deltaproteobacteria	Desulfovibrionales	Desulfovibrionaceae	Desulfovibrio	microbial mat metagenome	B11914_Desulfovibrio	Copiotroph	0	0	0	0	0	0	0	0	0	0	1.18804e-05	0	2.47985e-05	0	0	0	0	0	1.15713e-05	0	0	0	0	0	0	0	0	4.2595e-05
JX225057.1.1366	Bacteria	Firmicutes	Clostridia	Clostridiales	Christensenellaceae	Christensenellaceae R-7 group	iron-reducing bacterium enrichment culture clone HN109	B20580_Christensenellaceae R-7 group	Copiotroph	0	0	0	0	0	0	0	0	7.0132e-06	0	0	3.3541e-06	0	0	0	0	0	0	0	0	0	0	0	0	0	0	0	0
JX272000.1.1486	Bacteria	Bacteroidetes	Bacteroidia	Bacteroidales	SB-5	#N/A	#N/A	B1033_f_SB-5	Copiotroph	0.000266115	0	0.000123384	0.000228411	8.35711e-05	0	0	0	0.000792491	0	0.000225728	0.000290129	0.000137519	0	0	0	0.0001738	0	0.000275397	0	0	0.000288273	0.000418436	0	0	0	0	0.00118201
JX489918.1.1504	Bacteria	Proteobacteria	Gammaproteobacteria	Gammaproteobacteria Incertae Sedis	Unknown Family	#N/A	#N/A	B1944_f_Unknown Family	Copiotroph	0	0	0.000148564	0.000179331	0	0	9.19405e-05	0	0	0	0	0	0.000114975	6.76492e-05	0.000490372	0.00027048	0	0.000104744	5.32279e-05	7.97023e-05	6.62167e-05	0.000283698	0	0	0	0	0	0
JX504898.1.1404	Bacteria	Proteobacteria	Alphaproteobacteria	Rhizobiales	Rhodomicrobiaceae	Rhodomicrobium	#N/A	B779_Rhodomicrobium	Copiotroph	8.17018e-05	0	0	0	0	0	0	0	0.000444169	0.000358971	0.000881526	0.000833493	0.000259257	0.000230373	0.00031846	0.000374068	2.48286e-05	4.32638e-05	0.00100439	0.000635521	0.000269961	0.000533077	3.48696e-05	4.56795e-05	5.01547e-05	0	0	0
JX504929.1.1409	Bacteria	Chloroflexi	Ktedonobacteria	Ktedonobacterales	Ktedonobacteraceae	G12-WMSP1	uncultured Ktedonobacter sp.	B9513_G12-WMSP1	Copiotroph	0	0	0	0	0	0	0	0	0	0	0	0	4.28338e-05	0	0	0	0	0	5.78564e-05	4.82409e-05	0	0	0	0	0	0	0	0
JX504934.1.1485	Bacteria	Verrucomicrobia	Verrucomicrobiae	Chthoniobacterales	Chthoniobacteraceae	Candidatus Udaeobacter	#N/A	B917_Candidatus Udaeobacter	Copiotroph	0	0	0.000883833	0.00106655	0	0	0	0	0	0	0	0	0.000897255	0	0.000589009	0.00103396	0	0	0	0.000717321	0	0	0	0	0	0	0	0
JX504958.1.1412	Bacteria	Proteobacteria	Alphaproteobacteria	Rhizobiales	Xanthobacteraceae	#N/A	#N/A	B26_f_Xanthobacteraceae	Copiotroph	0.00850866	0	0.00259358	0	0.0062941	0	0.00588419	0	0.00422662	0	0.00975619	0	0.00416615	0	0.0107374	0	0	0.00681291	0.00744497	0.00511563	0.00611995	0.0109818	0.00309468	0	0.00535129	0.000215474	0.0040498	0.000871067
JX504968.1.1422	Bacteria	Chloroflexi	KD4-96	uncultured Longilinea sp.	uncultured Longilinea sp.	uncultured Longilinea sp.	uncultured Longilinea sp.	B876_uncultured Longilinea sp.	Copiotroph	0	0	0	0	0	0	0	0	0	0	0.000449079	0.00124102	0	0	0	0	0	0.00119772	0.000698906	0.000780244	0	0	0	0.000340965	0	0	0	0.000464285
JX505068.1.1432	Bacteria	Chloroflexi	Ktedonobacteria	Ktedonobacterales	Ktedonobacteraceae	HSB OF53-F07	uncultured Ktedonobacter sp.	B2224_HSB OF53-F07	Copiotroph	0	0	0	0	0	0	0	0	0	5.73006e-05	0.000130684	0.000164351	0.000392267	0	0	0	0	0	0.000604021	0	0	0.000210485	3.48696e-05	0	0	0	0	0
JX505205.1.1469	Bacteria	Proteobacteria	Deltaproteobacteria	Myxococcales	P3OB-42	#N/A	#N/A	B356_f_P3OB-42	Copiotroph	0.000354819	0.000811172	0.000886351	0.00161398	0.00058261	0	0	0.000890148	0.000458196	0.000908383	0.000439575	0.00144897	0.000349434	0.000298022	0.000693284	0.000822949	0.000281391	0	0.00180049	0.00160453	0	0.000485032	0.00030293	0.000177824	0	0	0.000134041	0
JX505283.1.1477	Bacteria	Acidobacteria	Aminicenantia	Aminicenantales	uncultured Desulfovibrio sp.	uncultured Desulfovibrio sp.	uncultured Desulfovibrio sp.	B1012_uncultured Desulfovibrio sp.	Copiotroph	0	8.92677e-05	0	0	4.29794e-05	4.01862e-05	0	0	0.000371699	0.000529188	0.000845885	0.000618831	0	0	0.000262095	0.000197584	0.000585542	3.41556e-05	4.62852e-05	0	0	0	0.000104609	8.3202e-05	0	0	0.000140633	0.000317333
JX505284.1.1474	Bacteria	Acidobacteria	Subgroup 17	uncultured Geobacter sp.	uncultured Geobacter sp.	uncultured Geobacter sp.	uncultured Geobacter sp.	B1963_uncultured Geobacter sp.	Copiotroph	0	0	0	0	0	0	0	0	0	0	0	0	0.000378741	0.000341903	0.000411461	0	0	0	0	0	0	0	0.00040318	0	0	0	0	0.0003365
JX505341.1.1457	Bacteria	Proteobacteria	Gammaproteobacteria	Methylococcales	Methylomonaceae	Methylobacter	#N/A	B474_Methylobacter	Copiotroph	0.0011695	0.000896558	0.000946784	0.00180841	0	0.000261211	0	0.000704878	0.00090704	7.75243e-05	0.00110488	0.000997843	0.00025024	0	0	0	0.000432432	0	0.000448966	6.08255e-05	0	0.000706956	0	0	0	0	0.000575718	0.0002577
JX505360.1.1472	Bacteria	Actinobacteria	Thermoleophilia	Gaiellales	uncultured	uncultured Conexibacteraceae bacterium	uncultured Conexibacteraceae bacterium	B653_uncultured Conexibacteraceae bacterium	Copiotroph	3.50151e-05	0.00028915	5.03608e-05	0.000605951	0	0.000179011	0.000177314	6.81453e-05	0.000717684	0.000183699	0.000634414	0.000513177	0.000588401	0.000351045	0.000462189	0	0.000374499	0	0.000518394	0.000109066	0.000117153	2.74546e-05	0.00070611	7.50449e-05	0.000337999	0.000176451	0	0.000724115
JX505366.1.1456	Bacteria	Firmicutes	Clostridia	Clostridiales	Peptococcaceae	Thermincola	uncultured Peptococcaceae bacterium	B12726_Thermincola	Copiotroph	0	0	0	0	0	0	0	0	0	0	1.90087e-05	3.01869e-05	0	0	0	0	0	0	0	0	0	0	1.96142e-05	0	0	0	0	0
JX505418.1.1479	Bacteria	Proteobacteria	Deltaproteobacteria	Myxococcales	Haliangiaceae	Haliangium	uncultured Kofleriaceae bacterium	B2232_Haliangium	Copiotroph	0.000203087	0	0	0	0	0	0	0	0	0.000207293	7.84107e-05	0	0.000225441	0.000188321	0	0.000120853	0	0.000166224	0	0.000297835	0	0	0	0	0	0	0	0
JX505425.1.1454	Bacteria	Acidobacteria	Subgroup 18	#N/A	#N/A	#N/A	#N/A	B359_o_NA	Copiotroph	0	0	0	0	0	0.00139008	0.000580101	0	0.000904702	0.00284986	0.00154445	0.000868711	0.00208984	0	0	0.000493002	0.000469675	0.000703606	0.000698906	0.00137801	0	0	0	0	0	0	0.000406518	0.000489842
JX828423.1.1511	Bacteria	Proteobacteria	Deltaproteobacteria	Desulfovibrionales	Desulfovibrionaceae	Desulfovibrio	Desulfovibrio sp. enrichment culture clone AP-FeEnrich15	B2272_Desulfovibrio	Copiotroph	0	0	0.000156119	0	4.29794e-05	0	4.37812e-05	4.68499e-05	9.5847e-05	0	4.03934e-05	0	0.000214169	9.69029e-05	0.000236731	6.71404e-05	3.72429e-05	0	6.01707e-05	8.80921e-05	6.36699e-05	0.000196758	0	0	0	1.18765e-05	4.83427e-05	6.60222e-05
KC122701.1.1373	Bacteria	Bacteroidetes	Bacteroidia	Flavobacteriales	Flavobacteriaceae	Flavobacterium	#N/A	B2071_Flavobacterium	Copiotroph	0	0	0	0	0	0	0	0	0.000348322	5.393e-05	0.00135437	0	0	0	0	0	0	0	0	0	0	0	9.58915e-05	0	0	0	0	0
KC172206.1.1504	Bacteria	Proteobacteria	Gammaproteobacteria	Xanthomonadales	Xanthomonadaceae	Luteimonas	#N/A	B8_Luteimonas	Copiotroph	0.00389368	0.00256548	0.00263135	0.00224258	0.00492592	0.00356379	0.00391404	0.00242981	0.0170257	0.0096147	0.0210996	0.00578749	0.00369949	0.00242806	0.00517427	0.00311531	0.00608508	0.00556509	0.00551719	0.00169892	0.000993251	0.000571971	0.0105284	0.00611453	0.00624535	0.00323211	0.00356198	0.0189569
KC358446.1.1261	Bacteria	Proteobacteria	Gammaproteobacteria	Betaproteobacteriales	Burkholderiaceae	Ramlibacter	#N/A	B504_Ramlibacter	Copiotroph	0	0.000555012	0.00061692	0	0.00045606	0	0	0	0.00333828	0.00235775	0.00119755	0.000189506	0	0	0	0	0	0	0.00039111	0.000377537	0	0.000322592	0	0.000195769	0	0	0.000808642	0
KC424660.1.1527	Bacteria	Proteobacteria	Gammaproteobacteria	Betaproteobacteriales	Gallionellaceae	Candidatus Nitrotoga	#N/A	B1046_Candidatus Nitrotoga	Copiotroph	0	0	0	0	0	0	0	0	0	0	0.00155871	0	0	0	0.000896196	0	0	0	0.00244848	0	0	0	0	0	0	0	0	0
KC424669.1.1499	Bacteria	Bacteroidetes	Bacteroidia	Bacteroidales	Bacteroidetes vadinHA17	#N/A	#N/A	B1537_f_Bacteroidetes vadinHA17	Copiotroph	0	0	0	0	0	0	0	0	0.000932755	0.00106512	0.000114052	0.0002046	0	0	0	0	0	0	0	0	0	0	0	0	0	0	0	0
KC432029.1.1380	Bacteria	Proteobacteria	Deltaproteobacteria	RCP2-54	uncultured prokaryote	uncultured prokaryote	uncultured prokaryote	B763_uncultured prokaryote	Copiotroph	3.26807e-05	7.76241e-05	7.05052e-05	0	0.000343835	0.000180838	0	0	0.000558718	9.26922e-05	0.000872022	0.00090896	3.38162e-05	0	4.50916e-05	7.28952e-05	0.000564851	0.000243644	0	6.08255e-05	0.00115625	0.000320304	0	0	9.81288e-05	7.46524e-05	3.07636e-05	0.000866808
KC541057.1.1554	Bacteria	Nitrospinae	P9X2b3D02	uncultured prokaryote	uncultured prokaryote	uncultured prokaryote	uncultured prokaryote	B2808_uncultured prokaryote	Copiotroph	0	0	0	0	0	0	0	0	0	0	0	0	0.000507242	0	0.000321278	0	0	0	0	0	0.000455877	0	0	0	0	0	0	0
KC541093.1.1549	Bacteria	Acidobacteria	Subgroup 6	Unknown Order	Unknown Family	Vicinamibacter	#N/A	B1457_Vicinamibacter	Copiotroph	0	0	0	0	0	0	0	0	0.000343647	0.000975796	0.000917167	0.00027839	0	0	0	0	0	0	0	0	0	0	0	0	0	0	0	0
KC541523.1.1526	Bacteria	Proteobacteria	Gammaproteobacteria	Betaproteobacteriales	Burkholderiaceae	Janthinobacterium	#N/A	B1715_Janthinobacterium	Copiotroph	0	0	0	0	0	0	0	0	0.000355335	0	0.00108825	0.000140872	0	0	0	0	0	0	0	0	0	0	0	0	0	0	0	0.000655963
KC554269.1.1519	Bacteria	Actinobacteria	Actinobacteria	Propionibacteriales	Nocardioidaceae	Nocardioides	#N/A	B538_Nocardioides	Copiotroph	0.000294127	0.000725785	0.000274467	0.00052478	0.000444121	0	0	0.000664416	0	0.000856138	0.001371	0.000332055	0.000662797	0.000127985	0	0.000141954	0	0.000560153	0.00189538	0.000415291	0	0	0	0	0.000992191	0	0	0
KC554789.1.1475	Bacteria	Actinobacteria	Actinobacteria	Frankiales	Sporichthyaceae	uncultured	#N/A	B856_uncultured	Copiotroph	0.00120685	0	0	0	0	0.000465795	0	0	0.000502612	0	0.00130209	0.000811691	0	0	0	0	0	0.000781026	0.000409624	0.000257984	0	0	0	0	0	0	0	0
KC571459.1.1397	Bacteria	Bacteroidetes	Bacteroidia	Chitinophagales	Chitinophagaceae	Taibaiella	#N/A	B6968_Taibaiella	Copiotroph	0	6.59805e-05	7.55413e-06	0	0	0	0	0	0	0	0.0001093	0	2.70529e-05	0	0	0	0	0	5.55422e-05	0	0	0	0	0	0	0	0	0
KC620692.1.1538	Bacteria	Proteobacteria	Gammaproteobacteria	Diplorickettsiales	Diplorickettsiaceae	Aquicella	uncultured bacterium	B8364_Aquicella	Copiotroph	0	0	0	0	0	0	0	0	0	0	0	0	0.00017359	0	0	0	0	0	0	0	0	0	1.96142e-05	0	0	0	0	0
KC682875.1.1557	Bacteria	Proteobacteria	Deltaproteobacteria	Syntrophobacterales	Syntrophaceae	Desulfobacca	#N/A	B396_Desulfobacca	Copiotroph	0	0	0	0	0	0	0	0	0.00215773	0.000441552	0.00206481	0	0.00178775	0.00230007	0.000868014	0.00352199	0	0	0	0	0.000244493	0	0	0	0	0.000359689	0	0
KC682970.1.1531	Bacteria	Proteobacteria	Gammaproteobacteria	Steroidobacterales	Steroidobacteraceae	uncultured	#N/A	B4090_uncultured	Copiotroph	0	0	0	0	0	0	0	0	0.000668591	0	0	0	0	0	0	0	0	0	0	0	0	0	0	0	0	0	0	0
KC683249.1.1480	Bacteria	Proteobacteria	Alphaproteobacteria	Rhizobiales	Beijerinckiaceae	alphaI cluster	#N/A	B2858_alphaI cluster	Copiotroph	0	0	0	0	0	0	0	0	0.000182343	0.00037751	0.000137813	0	0	0	0	0	0	0	0.000333253	0	0	0	0	0	0	0	0	0
KC708289.1.1466	Bacteria	Proteobacteria	Gammaproteobacteria	Legionellales	Legionellaceae	Legionella	Legionella taurinensis	B9583_Legionella	Copiotroph	0	0	0	0	0	0	0	0	0	0	0.000156821	0	0	0	0	0	0	0	0	0	0	0	0	0	0	0	0	0
KC836749.1.1489	Bacteria	Verrucomicrobia	Verrucomicrobiae	Pedosphaerales	Pedosphaeraceae	ADurb.Bin063-1	#N/A	B588_ADurb.Bin063-1	Copiotroph	0.000424849	0	0	0	0	0	0	0	0.000984185	0.00176789	0.000667679	0	0.00171561	0	0	0	0	0	0.000573936	0	0	0	0.00204205	0.000226766	0	0	0.000722943	0
KF026314.1.1526	Bacteria	Verrucomicrobia	Verrucomicrobiae	Pedosphaerales	Pedosphaeraceae	#N/A	#N/A	B544_f_Pedosphaeraceae	Copiotroph	0.000291792	0	0	0	0	0	0	0	0.000703657	0.000396048	0	0.000372305	0.00289466	0.00124694	0.00047628	0.00129869	0	0	0	0	0.000466064	0.000679502	0	0.000601991	0.000527715	0	0	0
KF026318.1.1474	Bacteria	Bacteroidetes	Ignavibacteria	SJA-28	uncultured bacterium	uncultured bacterium	uncultured bacterium	B2343_uncultured bacterium	Copiotroph	0	0	0	0	0	0	0	0	6.0781e-05	0.000151678	0.000185334	0	0.000378741	0	0.000177548	9.39965e-05	0	0	0.00010877	0.000100677	0	0	7.19186e-05	0.00011583	0	0	0	0
KF100898.1.1350	Bacteria	Proteobacteria	Gammaproteobacteria	Betaproteobacteriales	Burkholderiaceae	Massilia	#N/A	B680_Massilia	Copiotroph	0	0	0.000412959	0	0	0	0	0.000468499	0.000238449	0	0.000762722	0.000234787	0.00117004	0	0	0.000732789	0	0	0.00197638	0.00125007	0	0	0	0.000205558	0	0.00029861	0	0
KF428038.1.1493	Bacteria	Proteobacteria	Gammaproteobacteria	Betaproteobacteriales	SC-I-84	uncultured proteobacterium	uncultured proteobacterium	B1503_uncultured proteobacterium	Copiotroph	0	0.000287209	0	0	0.000386815	0	0	0	0.000355335	0.000158419	0	0.000642309	0	0	0	0	0	0	0.000229112	0	0	0.000455289	0	0	0	0	0	0
KF730273.1.1425	Bacteria	Chloroflexi	Ktedonobacteria	C0119	uncultured Chloroflexi bacterium	uncultured Chloroflexi bacterium	uncultured Chloroflexi bacterium	B8479_uncultured Chloroflexi bacterium	Copiotroph	0	0	0	0	0	0	0	0	0	0	0	0	4.05794e-05	8.77612e-05	5.07281e-05	0	0	0	0	0	0	0	0	0	0	0	0	0
KF733321.1.1405	Bacteria	Bacteroidetes	Bacteroidia	Cytophagales	Spirosomaceae	Dyadobacter	#N/A	B7711_Dyadobacter	Copiotroph	0	0	0	0	0	0	0	0	0	0	0.000104548	0	0	0	0	0	0	0	0	0	0	0	0.000122044	0	0	0	0	0
KF956776.1.1443	Bacteria	Actinobacteria	Actinobacteria	Frankiales	Geodermatophilaceae	Blastococcus	uncultured Blastococcus sp.	B122_Blastococcus	Copiotroph	0.00154767	0.00170773	0.00111549	0.00210101	0.00101718	0	0.00276697	0.0035542	0.000998212	0.00284481	0.00064867	0.0011035	0.00206729	0.00172597	0.00256459	0.00117208	0	0.000380266	0.00425823	0.00384669	0	0.00020591	0.00200936	0.000863017	0.00179903	0.0018188	0.00113605	0
KJ540700.1.1456	Bacteria	Proteobacteria	Gammaproteobacteria	Betaproteobacteriales	TRA3-20	#N/A	#N/A	B347_f_TRA3-20	Copiotroph	0	0	0	0	0	0.00035437	0	0	0	0.000170216	0	0.00166363	0.000766499	0.00199474	0.000611555	0.00153464	0	0.000712715	0.000659563	0.0017933	0	0.00016244	0.000411898	0.000871174	0.000896243	0.00203598	0	0
KJ600858.1.1427	Bacteria	Acidobacteria	Acidobacteriia	Acidobacteriales	#N/A	#N/A	#N/A	B8119_o_Acidobacteriales	Copiotroph	0	0	0	0	0	0	0	0	0	0	0	0	8.34132e-05	0	4.79099e-05	0	0	0	8.56275e-05	0	0	0	0	0	0	0	0	0
KJ654308.1.1211	Bacteria	Cyanobacteria	Oxyphotobacteria	Oxyphotobacteria Incertae Sedis	Unknown Family	Leptolyngbya ANT.L52.2	#N/A	B16467_Leptolyngbya ANT.L52.2	Copiotroph	0	0	0	0	0	0	0	0	0	0	1.66326e-05	1.50934e-05	0	0	0	0	0	0	0	0	0	0	0	0	0	0	0	0
KJ807924.1.1523	Bacteria	Planctomycetes	OM190	metagenome	metagenome	metagenome	metagenome	B11129_metagenome	Copiotroph	0	0	0	0	0	0	0	0	0	0	9.50433e-06	4.86344e-05	0	0	0	0	0	0	0	0	0	0	3.26903e-05	0	0	0	0	0
KJ877472.1.1355	Bacteria	Proteobacteria	Gammaproteobacteria	Betaproteobacteriales	Gallionellaceae	Candidatus Nitrotoga	#N/A	B77_Candidatus Nitrotoga	Copiotroph	0	0	0	0	0.00190542	0.000695953	0.000956619	0.00488942	0.00217409	0	0.00478068	0.00677527	0.005494	0.00415586	0.0014063	0.00483794	0	0	0.00095116	0.00338945	0.00196103	0.000583411	0.0020791	0.00440644	0	0.000989145	0.00228749	0.00150147
KM007100.1.1488	Bacteria	Proteobacteria	Gammaproteobacteria	Xanthomonadales	Rhodanobacteraceae	#N/A	#N/A	B1311_f_Rhodanobacteraceae	Copiotroph	0	0	0	0	0	0	0	0	0.00233539	0.000217405	0	0	0	0	0	0	0	0	0	0.000201353	0	0	0.000560093	0	0	0	0	0
KM200410.1.1513	Bacteria	Planctomycetes	Planctomycetacia	Gemmatales	Gemmataceae	uncultured	uncultured bacterium	B7080_uncultured	Copiotroph	0	0	0	0	0	0	0	0	7.48074e-05	0	0.000199591	0	0	0	0	0	0	0	0	0	0	0	0	0	0	0	0	0
KM200537.1.1487	Bacteria	Gemmatimonadetes	Gemmatimonadetes	Gemmatimonadales	Gemmatimonadaceae	Gemmatimonas	uncultured Gemmatimonadaceae bacterium	B760_Gemmatimonas	Copiotroph	0	0.000174654	0.000123384	0.000326572	0	0	0	0	0.00121095	0.00248583	0.000755594	0.000353857	0	0	0	0	0	0.000348388	0.000323996	0	0	0	0	0	0	0	0	0
KM200555.1.1459	Bacteria	Acidobacteria	Acidobacteriia	Acidobacteriales	Acidobacteriaceae (Subgroup 1)	Edaphobacter	uncultured Acidobacterium sp.	B10164_Edaphobacter	Copiotroph	0	0	0	0	0	0	0	0	3.03905e-05	0	5.9402e-05	0	0	0	0	0	0	1.36623e-05	3.47139e-05	0	0	0	0	0	0	0	0	0
KM205467.1.1426	Bacteria	Chloroflexi	Anaerolineae	RBG-13-54-9	#N/A	#N/A	#N/A	B4019_o_RBG-13-54-9	Copiotroph	0	0	3.52526e-05	0	0	0	0	0	0	2.35944e-05	0	0	0.000257003	0	0	0	0	0	0.000113399	5.8728e-05	7.38571e-05	0	7.19186e-05	0	2.83483e-05	0	0	0
KM205525.1.1430	Bacteria	Acidobacteria	Acidobacteriia	Solibacterales	Solibacteraceae (Subgroup 3)	AKIW659	uncultured soil bacterium	B1160_AKIW659	Copiotroph	0	0	0	0	0	0	0	0	0	0	0	0.000171059	0.000901764	0.000694776	0	0.00058508	0	0	0	0	0	0.000917442	0	0.000290391	0	0	0	0
KM205529.1.1449	Bacteria	Acidobacteria	Aminicenantia	Aminicenantales	uncultured soil bacterium	uncultured soil bacterium	uncultured soil bacterium	B1731_uncultured soil bacterium	Copiotroph	0	0	0	0	0	0	0	0	0	5.393e-05	9.97954e-05	0.000187829	0	0	0	4.79574e-05	0.000386913	0	0	0	0	0	0.000429332	0.000200664	0	0	0	0.000575032
KM410824.1.1460	Bacteria	Proteobacteria	Deltaproteobacteria	Syntrophobacterales	Syntrophaceae	Desulfobacca	uncultured prokaryote	B354_Desulfobacca	Copiotroph	0.000205422	0	0	0	0.000756916	0.000281304	0	0	0.000815869	0.00153026	0	0.00220867	0.000448628	0.00256884	0.00134711	0.00118551	0	0	0.00216846	0.00121441	0	0	0	0	0.000189716	0	0	0
KM823766.1.1518	Bacteria	Chloroflexi	Anaerolineae	Caldilineales	Caldilineaceae	uncultured bacterium	uncultured bacterium	B2975_uncultured bacterium	Copiotroph	0	0	0	0	0	0	0	0	0.000254813	0.000104489	0	0.000223047	0	0	0	0	0	0	0.000111084	9.01895e-05	0.000106965	7.55002e-05	0	0	0	0	0	0
KP299807.1.1491	Bacteria	Actinobacteria	MB-A2-108	Actinobacteria bacterium RBG_19FT_COMBO_70_19	Actinobacteria bacterium RBG_19FT_COMBO_70_19	Actinobacteria bacterium RBG_19FT_COMBO_70_19	Actinobacteria bacterium RBG_19FT_COMBO_70_19	B4714_Actinobacteria bacterium RBG_19FT_COMBO_70_19	Copiotroph	0	0	0	0	0	0	0	0	0.000100522	8.42656e-05	0.000320771	0	0	0	0	0	0	0	0	0	0	0	0	0	0	0	0	0
KP334257.1.1485	Bacteria	Acidobacteria	Blastocatellia (Subgroup 4)	Blastocatellales	Blastocatellaceae	Tellurimicrobium	Tellurimicrobium multivorans	B4415_Tellurimicrobium	Copiotroph	0	0	0	0	0	0	0	0	0	0.000134825	0.000159197	0.000177767	0	0	0	0	0	0	0	0	0	0	0	0	0	0	0	0
KP686905.1.1471	Bacteria	Proteobacteria	Deltaproteobacteria	Bdellovibrionales	Bdellovibrionaceae	Bdellovibrio	uncultured deep-sea bacterium	B13842_Bdellovibrio	Copiotroph	0	0	1.00722e-05	0	0	0	0	0	1.40264e-05	0	0	0	6.76323e-06	0	2.25458e-05	0	6.20716e-06	0	9.25703e-06	0	0	0	0	0	0	0	0	0
KP749219.1.1510	Bacteria	Omnitrophicaeota	uncultured bacterium	uncultured bacterium	uncultured bacterium	uncultured bacterium	uncultured bacterium	B8120_uncultured bacterium	Copiotroph	0	3.10496e-05	0	0	0	0	0	0	3.03905e-05	0	0	0	9.69396e-05	0	0	0	0	0	1.15713e-05	0	0	1.83031e-05	0	0	0	0	0	1.27785e-05
KP763243.1.1521	Bacteria	Planctomycetes	Phycisphaerae	Pla1 lineage	#N/A	#N/A	#N/A	B3341_o_Pla1 lineage	Copiotroph	0	0	0	0	0	0	0	0	7.71452e-05	9.10068e-05	7.60346e-05	0	3.15617e-05	6.76492e-05	0	0.000141954	0	3.41556e-05	0	0	8.40443e-05	0.000102955	3.92283e-05	0	3.0529e-05	0	0	4.47247e-05
KP979555.1.1378	Bacteria	Bacteroidetes	Bacteroidia	Cytophagales	Spirosomaceae	Dyadobacter	#N/A	B4577_Dyadobacter	Copiotroph	0	0	0	0	0	0	0	6.38862e-06	6.54565e-05	2.02237e-05	0	0.0001023	0	1.27985e-05	1.97276e-05	0	0	0.000207211	0	0	0	0	0	0	0	0	0	6.38925e-05
KR078254.1.1467	Bacteria	Bacteroidetes	Bacteroidia	Chitinophagales	Chitinophagaceae	Taibaiella	#N/A	B4578_Taibaiella	Copiotroph	8.87048e-05	0	0	0	0	0	0	0	0.000100522	0	0.000289882	0	0	2.19403e-05	0	0	0	0	0	5.03383e-05	0	0	0	0	0	0	0	0
KR107309.1.1365	Bacteria	Latescibacteria	Latescibacteria	Latescibacterales	Latescibacteraceae	Candidatus Latescibacter	metagenome	B3914_Candidatus Latescibacter	Copiotroph	1.16717e-05	0	0	0	0	0	0	0	6.54565e-05	0.000124713	0.000161574	0.00014758	0	0	0	0	0	0	4.85994e-05	0	6.11231e-05	0	0	0	0	0	0	0
KR181805.1.1377	Bacteria	Bacteroidetes	Bacteroidia	Sphingobacteriales	Sphingobacteriaceae	Mucilaginibacter	#N/A	B1560_Mucilaginibacter	Copiotroph	0	0	0	0.000551208	0	0	0	0	0.000593784	0	0.000586892	0	0	0	0	0	0	0	0.000152741	0	0	0	0.000444588	0.00018435	0	0	0	0
KT005672.1.1200	Bacteria	Proteobacteria	Gammaproteobacteria	Xanthomonadales	Rhodanobacteraceae	Luteibacter	#N/A	B5033_Luteibacter	Copiotroph	0.000154066	0	0	0	0	0	0	0	0	0	9.26672e-05	0	0	0	0.000281823	0	0	0	0	0	0	0	0	0	0	0	0	0
KT342856.13747.15224	Bacteria	Chloroflexi	Dehalococcoidia	S085	uncultured bacterium 5G4	uncultured bacterium 5G4	uncultured bacterium 5G4	B689_uncultured bacterium 5G4	Copiotroph	0.000322139	0	0.000523753	0.000277491	0	0.000281304	0	0	0.000292217	0.00139544	0.000218599	0	0.000741701	0.000213918	0.000448098	0.000629201	0	0	0.000779905	0.000692152	0	0.000226501	0	0	0.000329277	0	0	0
KT835570.1.1453	Bacteria	Chloroflexi	OLB14	uncultured bacterium	uncultured bacterium	uncultured bacterium	uncultured bacterium	B517_uncultured bacterium	Copiotroph	0	0.000376477	0.000183817	0	0	0	0	0	0.000238449	0.000210664	0.000670055	0.0019437	0	0	0.000744012	0	0	0.000491841	0.00330013	0.00116198	8.14975e-05	0	0	0	0.000361986	0.000753311	0	0
KT950746.1.1404	Bacteria	Proteobacteria	Alphaproteobacteria	Caulobacterales	Caulobacteraceae	Phenylobacterium	Phenylobacterium sp. HKS-05	B2511_Phenylobacterium	Copiotroph	0	0	0	0	0	0	0	0	0.000105198	0.000320209	0	0	0	0	0.000374824	0	0	0.00023909	0	0.00013843	0	0	0.000139479	0	0	0	0	0
KU173037.1.1218	Bacteria	Actinobacteria	Actinobacteria	Corynebacteriales	Mycobacteriaceae	Mycobacterium	#N/A	B925_Mycobacterium	Copiotroph	0	0	0	0	0	0	0	0	0	0	0	0	0.0014586	0.00133104	0.00065101	0.00121428	0	0.00032334	0	0	0	0	0	0	0	0	0	0
KU519588.1.1438	Bacteria	Chloroflexi	Anaerolineae	Anaerolineales	Anaerolineaceae	RBG-16-58-14	uncultured Chloroflexi bacterium	B1633_RBG-16-58-14	Copiotroph	0	0	0	0	0	0	0	0	0	0	0	0.0018196	0	0	0	0	0	0	0	0	0	0	0	0	0	0	0	0
KU519603.1.1436	Bacteria	Verrucomicrobia	Verrucomicrobiae	Pedosphaerales	Pedosphaeraceae	ADurb.Bin063-1	uncultured Verrucomicrobia bacterium	B99_ADurb.Bin063-1	Copiotroph	0	0	0.00140255	0.00227656	0.00043457	0.00152525	0.000742091	0.00168873	0	0.00164823	0.00191037	0.0010666	0.00259933	0.00722018	0.00745985	0.00966054	0	0	0.00176346	0.00253789	0.00208073	0.0016427	0.000978529	0	0	0	0.00193151	0
KU726322.1.1357	Bacteria	Proteobacteria	Gammaproteobacteria	Betaproteobacteriales	Gallionellaceae	Gallionella	#N/A	B3993_Gallionella	Copiotroph	0	0	0	0	0	0	0	0	0.000694306	0	0	0	0	0	0	0	0	0	0	0	0	0	0	0	0	0	0	0
KX035369.1.1442	Bacteria	Chloroflexi	Chloroflexia	Chloroflexales	Roseiflexaceae	uncultured	uncultured Chloroflexaceae bacterium	B1748_uncultured	Copiotroph	0	0	0	0	0	0	0	0	0	0	0.00028513	0	0	0	0	0	0	0	0.00101596	0.000876726	0	0	0	0	0	0	0	0
KX239204.1.1487	Bacteria	Latescibacteria	uncultured bacterium	uncultured bacterium	uncultured bacterium	uncultured bacterium	uncultured bacterium	B2396_uncultured bacterium	Copiotroph	0	0	0	0	0	0	0	0	0	0	0.000102172	0.000266651	0.000164572	0.000369328	0	0.00033762	0	0	0	0	0	0	0	0	0	0	0	0
KX504743.1.1521	Bacteria	Acidobacteria	Subgroup 22	uncultured proteobacterium	uncultured proteobacterium	uncultured proteobacterium	uncultured proteobacterium	B2934_uncultured proteobacterium	Copiotroph	0	0	0	0	0	0	0	0	0	0	0	0.000432678	0	0	0	0	0	0	6.71135e-05	0.000167794	0	0.000116682	0	0	0	0.000108585	0	0
KX504809.1.1514	Bacteria	Acidobacteria	Subgroup 22	uncultured prokaryote	uncultured prokaryote	uncultured prokaryote	uncultured prokaryote	B589_uncultured prokaryote	Copiotroph	0	0	0.000181299	0.000585186	0.000245938	0.000431089	9.85077e-05	0.000176752	0.00032962	0	0.000750842	0.000551749	0.000376487	0.000561306	0.000205731	0.000498757	0.000657959	0.000125237	0.000118027	0.000518065	0.000379473	0.00151458	0.000313827	0.000195769	0	0	0.000156015	0.000153342
KX504814.1.1532	Bacteria	Proteobacteria	Deltaproteobacteria	Sva0485	uncultured soil bacterium	uncultured soil bacterium	uncultured soil bacterium	B650_uncultured soil bacterium	Copiotroph	0	0	0	0	0	0.000107772	0	0	0.00164576	0.000942089	0.000767474	0.00118903	0	0	0	0.000195666	0	0	0	0	0.00255953	0.000430122	0	0	0.000401238	0	0	0
KX504822.1.1481	Bacteria	Bacteroidetes	Bacteroidia	Bacteroidales	Bacteroidetes BD2-2	uncultured Bacteroidetes bacterium	uncultured Bacteroidetes bacterium	B16471_uncultured Bacteroidetes bacterium	Copiotroph	0	0	0	0	0	0	0	0	0	1.68531e-05	7.12824e-06	5.03114e-06	0	0	0	0	0	0	0	0	0	0	0	0	0	0	0	0
KX504863.1.1525	Bacteria	Proteobacteria	Deltaproteobacteria	Desulfarculales	Desulfarculaceae	Desulfatiglans	#N/A	B1143_Desulfatiglans	Copiotroph	0	0	0	0	0	0	0	0	0	0.00019044	0	0	0.000225441	0	0.000546736	0.000268561	0	0	0	0	0.0027811	0.000359198	0	0	0	0	0	0
KX753046.1.1451	Bacteria	Chloroflexi	TK10	uncultured Chloroflexus sp.	uncultured Chloroflexus sp.	uncultured Chloroflexus sp.	uncultured Chloroflexus sp.	B1909_uncultured Chloroflexus sp.	Copiotroph	0.000102711	0.000141664	0	0	0.000119387	0	0	0	0.000409103	0.000180328	3.08891e-05	0.000321993	0	0	0	0	0	0.000289184	0	0	0.000150261	0	8.71741e-05	0	0	0	0	0
KY190358.1.1403	Bacteria	Chloroflexi	Chloroflexia	Chloroflexales	Roseiflexaceae	uncultured	uncultured Chloroflexaceae bacterium	B1001_uncultured	Copiotroph	0.000534563	0.000209585	0	0	0	0	0	0	0.000271177	0	0.000986074	0.000521562	0	0	0	0	0.000473813	0	0.000738248	0.000339784	0	0	0	0	0.000383793	0	0	0.000153342
KY190481.1.1442	Bacteria	Actinobacteria	Actinobacteria	Micrococcales	Intrasporangiaceae	#N/A	#N/A	B400_f_Intrasporangiaceae	Copiotroph	0	0.000360952	0.00046332	0	0	0	0	0	0.000161304	0.00134319	0.000715201	0.000211308	0.00183509	0.00130545	0.00132457	0.000130444	0	0	0.000988188	0.00224006	0.000343818	0.00166558	0	0	0	0	0.000973447	0
KY287309.1.1487	Bacteria	Nitrospirae	Thermodesulfovibrionia	uncultured	uncultured Sphingobacteriales bacterium	uncultured Sphingobacteriales bacterium	uncultured Sphingobacteriales bacterium	B113_uncultured Sphingobacteriales bacterium	Copiotroph	0.000613931	0.000343487	0.00211767	0.0004757	0.00227313	0.0010759	0.000637017	0.00199538	0.00477365	0.000578062	0.00314831	0.00146406	0.00361607	0.00161992	0.00547863	0.00122771	0.00313875	0.00145275	0.00284654	0.000943843	0.00450019	0.00183031	0.000710469	0.00138996	0	0	0	0.00216382
KY287319.1.1489	Bacteria	Nitrospirae	Thermodesulfovibrionia	uncultured	uncultured prokaryote	uncultured prokaryote	uncultured prokaryote	B2_uncultured prokaryote	Copiotroph	0.00485309	0.00497376	0.00697749	0.00833796	0.00841919	0.0102183	0.00667882	0.00719997	0.00826622	0.0075266	0.00716389	0.0086586	0.0147393	0.0161005	0.0151142	0.014861	0.00529884	0.00611614	0.00341816	0.00170731	0.0264128	0.0171065	0.00676253	0.00726305	0.00215011	0.000415678	0.000700969	0.00445117
KY287357.1.1487	Bacteria	Nitrospirae	Thermodesulfovibrionia	uncultured	uncultured bacterium	uncultured bacterium	uncultured bacterium	B289_uncultured bacterium	Copiotroph	0	0.000294972	0.000478428	0	0	0.000560781	0	0.000726173	0	0	0	0	0.000732683	0.00112078	0.000538281	0.000771155	0	0	0	0	0.0099376	0.00688882	9.80708e-05	0	0	0	0	0.000181029
KY287436.1.1515	Bacteria	Proteobacteria	Deltaproteobacteria	Desulfuromonadales	Geobacteraceae	Geobacter	#N/A	B3299_Geobacter	Copiotroph	0	0	0	0	0	0	0	0	0	0	0	0	0.000500479	0	0.00049319	0	0	0	0	0	0	0	0	0	0	0	0	0
KY992644.1.1506	Bacteria	Bacteroidetes	Bacteroidia	Cytophagales	Microscillaceae	uncultured	#N/A	B2397_uncultured	Copiotroph	0	0	0	0	0	0	0	0	5.14301e-05	6.90978e-05	0.000135437	0.000248203	0	0	0.000160639	0.00040476	0	0	0	0	0	0.000265395	0	0	0	0	0	0
KY992744.1.1472	Bacteria	Proteobacteria	Alphaproteobacteria	Rhizobiales	Rhodomicrobiaceae	Rhodomicrobium	#N/A	B3367_Rhodomicrobium	Copiotroph	0	0	0	0	0	0	0	0	4.67546e-05	0	0	0	0	0.000270597	0.000439643	9.78331e-05	0	0	0	0	0	0	0	1.46827e-05	0	0	0	0
LC106985.1.1401	Bacteria	Proteobacteria	Alphaproteobacteria	Rhizobiales	Xanthobacteraceae	#N/A	#N/A	B147_f_Xanthobacteraceae	Copiotroph	0.00203087	0	0.006071	6.04063e-05	0.00249042	0	0.00492539	0	0.00125069	0	0.00306277	0	0.00174266	0	0.00367215	0	0	0.00139355	0.00494325	0.00260291	0.00192029	0.00226272	0.0018895	0	0	0	0	0
LC124504.1.1477	Bacteria	Chloroflexi	Anaerolineae	SJA-15	#N/A	#N/A	#N/A	B69_o_SJA-15	Copiotroph	0	0.00130797	0	0	0.00178365	0.00241665	0	0.00294515	0.00108003	0.00594578	0.00182483	0.00789219	0.00300287	0.00641753	0	0.000508348	0.00131799	0	0.000601707	0.00123958	0.000443143	0	0.00184373	0.00668879	0.000403418	0.00426367	0.00149423	0.000402522
LC124574.1.1445	Bacteria	Bacteroidetes	Bacteroidia	Bacteroidales	Prolixibacteraceae	BSV13	#N/A	B375_BSV13	Copiotroph	0	0.000207644	0.000125902	0.00104578	4.77549e-05	0.000153438	0.00032617	0.000283229	0.000238449	0.000905012	0.00053937	0.000447772	0.00085893	0.0010897	0.000552373	0.00109151	0.00054623	0.000473625	0.000465166	0.000245399	0.000853177	0.000302001	0.00125967	0.00147153	0	0.00027825	0	0.000357798
LC124614.1.1455	Bacteria	Bacteroidetes	Ignavibacteria	Kryptoniales	BSV26	uncultured Chlorobiales bacterium	uncultured Chlorobiales bacterium	B1534_uncultured Chlorobiales bacterium	Copiotroph	0.000133057	0.000114496	0.000173745	3.77539e-05	0	1.46132e-05	0.000153234	0.000102218	0.000194032	0.000109545	9.50433e-05	0.000202923	6.98867e-05	2.37686e-05	0.000107093	0.000140036	2.48286e-05	0.000109298	0.000150427	1.25846e-05	0	5.03335e-05	0.000165631	4.40481e-05	1.09032e-05	0	0.000259293	6.38925e-05
LC124686.1.1462	Bacteria	Proteobacteria	Gammaproteobacteria	Betaproteobacteriales	Gallionellaceae	Candidatus Nitrotoga	#N/A	B184_Candidatus Nitrotoga	Copiotroph	0	0	0	0	0	0	0.00351125	0.00203158	0.00275385	0	0.00480444	0.00111691	0.00171786	0.000162724	0.00087365	0.000552469	0	0	0.00148112	0.00150176	0.00307908	0.00150085	0.00308814	0.00137365	0.000841727	0	0	0.00124803
LM995447.549213.550713	Bacteria	Firmicutes	Clostridia	Clostridiales	Ruminococcaceae	Ruminiclostridium	[Clostridium] cellulosi	B14400_Ruminiclostridium	Copiotroph	0	0	0	0	0	0	0	0	5.84433e-05	0	0	0	0	0	0	0	0	0	0	0	0	0	0	0	0	0	0	0
LN562917.1.1353	Bacteria	Actinobacteria	Actinobacteria	Corynebacteriales	Mycobacteriaceae	Mycobacterium	#N/A	B3334_Mycobacterium	Copiotroph	0	0	0	0	0	0	0	0	0	0.000483684	0	0.000174413	0	0	0	0	0	0	0	0	0	0	0	0	0	0	0	0
LN570522.1.1368	Bacteria	Proteobacteria	Gammaproteobacteria	CCD24	uncultured gamma proteobacterium	uncultured gamma proteobacterium	uncultured gamma proteobacterium	B2219_uncultured gamma proteobacterium	Copiotroph	0	0	0.000143528	5.28555e-05	0	0	0	0	0.000273515	0.000180328	0	0	0.000392267	0.000287052	0	0	0	0.000211765	0	0	0	0	0	0	0	0	0	0
LN570795.1.1387	Bacteria	Proteobacteria	Deltaproteobacteria	Myxococcales	Sandaracinaceae	uncultured	uncultured soil bacterium	B737_uncultured	Copiotroph	0.000382831	9.89707e-05	0.000130938	0	0.000128938	8.03725e-05	0	0.000102218	0.000285203	0.000642104	0.000660551	0.000338764	7.89044e-05	8.59328e-05	9.58197e-05	0	0	0	6.94277e-05	5.8728e-05	0	4.80456e-05	0.00280483	0.000401327	0	0	0	0.000291776
LN571028.1.1365	Bacteria	Proteobacteria	Gammaproteobacteria	Betaproteobacteriales	Burkholderiaceae	Aquabacterium	#N/A	B1668_Aquabacterium	Copiotroph	0.000324473	0	0	0	0	0	0	0	0	0	0	0	0.00137294	0	0	0	0	0	0	0	0	0	0.000653806	0	0	0	0	0
LN572439.1.1322	Bacteria	Proteobacteria	Alphaproteobacteria	Elsterales	#N/A	#N/A	#N/A	B5935_o_Elsterales	Copiotroph	0	0	0	0	0	0	0	0	0	0.000151678	0.000159197	0	0	0	0	0	0	0	0	0	0	0	0	0	0	0	0	0
LN572508.1.1326	Bacteria	Proteobacteria	Alphaproteobacteria	Acetobacterales	Acetobacteraceae	uncultured	uncultured forest soil bacterium	B839_uncultured	Copiotroph	0	0	0	0	0	0	0	0.000264063	0.000215071	0.00151678	0.000634414	0.00107331	0	0.00047903	0	0.000606182	0	0	0	0.000266374	0	0	0	0	0	0	0	0
LN572864.1.1391	Bacteria	Proteobacteria	Deltaproteobacteria	MBNT15	#N/A	#N/A	#N/A	B394_o_MBNT15	Copiotroph	0.00118584	0.00171549	0	0.00217085	0	0.000674033	0	0.000489794	0.000168317	0.000810635	0	0.000944178	0	0.000983656	0.000510099	0.00113179	0	0	0.000819247	0.000333491	0.0012352	0	0	0	0	0	0	0
LN830908.1.1271	Bacteria	Proteobacteria	Gammaproteobacteria	Xanthomonadales	Rhodanobacteraceae	Rhodanobacter	#N/A	B4953_Rhodanobacter	Copiotroph	0	0	0	0	0	0	0	0	0.000357673	0	4.75216e-05	0	0	0	0	0	0	0	0	0	0	0	0	0	0	0	0	8.09304e-05
LN870898.1.1399	Bacteria	Omnitrophicaeota	uncultured bacterium	uncultured bacterium	uncultured bacterium	uncultured bacterium	uncultured bacterium	B4593_uncultured bacterium	Copiotroph	0	3.29902e-05	6.0433e-05	9.43849e-06	0	0	0	0	1.63641e-05	8.42656e-06	3.08891e-05	3.18639e-05	3.38162e-05	9.14179e-05	0	0	0	0	0	0	3.8202e-05	0.000105243	0	0	0	0	0	4.68545e-05
LXQJ01000056.13.1537	Bacteria	Proteobacteria	Gammaproteobacteria	Xanthomonadales	Xanthomonadaceae	Luteimonas	#N/A	B329_Luteimonas	Copiotroph	0.000413178	0.00108868	0	0.000371876	0.00156159	0.00061558	0	0.00109245	0.000813531	0.0018589	0.000318395	0.00201078	0.000430592	0.000987313	0	0.00016881	0	0	0	0	0.000183369	0.000178455	0.000316006	0.00160694	0	0.000419072	0	0.000998852
000dc2b6bca91c9472c4d3856d5e7271	Bacteria	Chloroflexi	Anaerolineae	C10-SB1A	uncultured bacterium	uncultured bacterium	uncultured bacterium	B2527_uncultured bacterium	Oligotroph	6.30271e-05	0.000302734	5.7915e-05	2.26524e-05	3.58162e-05	7.67192e-05	0	2.98136e-05	0	0	0	0	0	0	3.38187e-05	0	1.44834e-05	1.36623e-05	2.77711e-05	0.000119553	0	0	3.48696e-05	6.52565e-05	0.000200619	8.82256e-05	3.07636e-05	0
006e71044917e5e7ac31716972a9e388	Bacteria	Bacteroidetes	Bacteroidia	Cytophagales	Spirosomaceae	uncultured	metagenome	B10167_uncultured	Oligotroph	0	0	0	0	5.25304e-05	0	0	0	0	0	0	0	0	0	0	0	0	0	0	0	0	0	0	0	1.96258e-05	0	0	5.75032e-05
0088de086e348700b529913655d5d4df	Bacteria	Armatimonadetes	#N/A	#N/A	#N/A	#N/A	#N/A	B10603_o_NA	Oligotroph	0	0	0	0	0	0	0	0	0	0	0	0	0	0	0	0	0	0	0	0	0	0	0	0	0	6.61692e-05	3.07636e-05	0
00915b0be567e4b36aed64bef3c82287	Bacteria	Chloroflexi	Ktedonobacteria	C0119	uncultured soil bacterium	uncultured soil bacterium	uncultured soil bacterium	B723_uncultured soil bacterium	Oligotroph	0.000170407	0.0002581	0.000153601	0.000479475	0.00014804	0.00029957	0.000240797	0.000502571	0.000140264	0	0.000114052	0.000256588	0	0	0.000538281	0	0.000134488	0.000273245	0.000553108	0.000327199	0	9.15154e-05	0.000446767	0.000680299	0.000287844	0.000524264	0.000138436	0.000121396
00e1282ce1cb89dc9dee1bae144d33ab	Bacteria	Proteobacteria	Gammaproteobacteria	Gammaproteobacteria Incertae Sedis	Unknown Family	Candidatus Berkiella	uncultured gamma proteobacterium	B1793_Candidatus Berkiella	Oligotroph	0	0	0	0	0	0	0.000262687	0.000195918	0	0	0	0	0	0	0.000188821	0.000105506	0	0	0	0	0.000203744	8.23638e-05	5.01251e-05	0	0.000163548	0	0.000881156	0
0142bc1498342743ff32c51a588bd45e	Bacteria	Omnitrophicaeota	uncultured bacterium	uncultured bacterium	uncultured bacterium	uncultured bacterium	uncultured bacterium	B17740_uncultured bacterium	Oligotroph	0	0	0	0	0	0	0	0	0	0	0	0	0	0	0	0	0	0	0	0	0	0	0	0	0	0	2.41714e-05	0
01b6acf9a901984c10267c0fa56afab1	Bacteria	#N/A	#N/A	#N/A	#N/A	#N/A	#N/A	B5936_o_NA	Oligotroph	0	0	0	0	0.000205346	2.92264e-05	0	0	0	0	0	0	0	0	0	0	0	0	0	0	0	0	0	0	0.00010249	0	0	1.49082e-05
01d8346f8bb03d2a4d0b4d67dc208682	Bacteria	Chloroflexi	Chloroflexia	Chloroflexales	Roseiflexaceae	uncultured	uncultured bacterium	B8650_uncultured	Oligotroph	1.4006e-05	0	0	0	0.000102673	5.66261e-05	0	0	0	0	0	0	0	0	0	0	0	0	0	0	0	0	0	0	0	0	0	0
01f7e420297ec105b1dddc02f8fa2520	Bacteria	Bacteroidetes	Ignavibacteria	OPB56	#N/A	#N/A	#N/A	B6459_o_OPB56	Oligotroph	0.000114383	0	0	0	6.44691e-05	0	0	0	0	0	0	0	0	0	0	0	0.000124143	0	0	0	0	0	0	0	0	0	0	0
024ffef3c8d40368a1bb1c73aed47a79	Bacteria	Verrucomicrobia	Verrucomicrobiae	Verrucomicrobiales	Verrucomicrobiaceae	Roseimicrobium	uncultured Verrucomicrobia bacterium	B3670_Roseimicrobium	Oligotroph	0	3.10496e-05	0	0	0.000107449	0.000104119	0	0	3.03905e-05	0	0	0.000120747	0	0	1.12729e-05	0	0.000115867	0	3.23996e-05	3.35589e-05	0	0	0	0	4.79741e-05	3.22363e-05	0	1.27785e-05
026e233f0053b9891e5776ecbbe39878	Bacteria	Dependentiae	Babeliae	Babeliales	Vermiphilaceae	#N/A	#N/A	B9457_f_Vermiphilaceae	Oligotroph	0	0	0	0	0	0.000122385	0	0	0	0	0	0	0	0	0	0	0	0	0	0	0	0	0	0	0	0	0	0
02b8c69627a6d011987eac45d549f7ce	Bacteria	Chlamydiae	Chlamydiae	Chlamydiales	Parachlamydiaceae	Neochlamydia	uncultured bacterium corvenA4	B8652_Neochlamydia	Oligotroph	0	0	0	0	7.16324e-05	0	0	0	0	0	0	0	0	0	0	0	0	0	0	0	0	0	0	0	0	0	0.00010987	0
02dabc3d062a89bbcc7a10e90456662d	Bacteria	Chloroflexi	Anaerolineae	SBR1031	A4b	wastewater metagenome	wastewater metagenome	B1221_wastewater metagenome	Oligotroph	0	0	0	0	0.000343835	0.000127865	0	0	0.000198707	0	0	0	0	0	0.000180367	0	0.00111315	0	0	0.000264276	0	0	0.00026806	8.3202e-05	0.000501547	0	0	0.000468545
037ea01d80b3d80c5f16386636a4f2f5	Bacteria	Chlamydiae	Chlamydiae	Chlamydiales	Parachlamydiaceae	Neochlamydia	#N/A	B9663_Neochlamydia	Oligotroph	0	0	0	0	0	0	0	0	0	0	0	0	0	0	0	0	0	0	0	0	0	0	0	0	0	5.93826e-05	6.37245e-05	0
038f015629b210f286c7e7f7a1a44b91	Bacteria	#N/A	#N/A	#N/A	#N/A	#N/A	#N/A	B13634_o_NA	Oligotroph	0	0	1.51083e-05	0	0	2.19198e-05	0	1.70363e-05	0	0	0	0	0	0	0	0	0	0	0	0	0	0	0	0	0	0	4.39479e-06	0
0425f529e544b38c99e483652f22dfa4	Bacteria	Acidobacteria	AT-s3-28	uncultured bacterium	uncultured bacterium	uncultured bacterium	uncultured bacterium	B7541_uncultured bacterium	Oligotroph	0	0	0	0	4.77549e-05	5.11461e-05	0	0	0	0	0	0	0	0	0	0	0	0.000120683	0	4.19486e-06	0	0	0	0	0	0	0	0
0457ad4a56fd6ebbfca749b4b5e52281	Bacteria	Proteobacteria	Gammaproteobacteria	Diplorickettsiales	Diplorickettsiaceae	Aquicella	metagenome	B3899_Aquicella	Oligotroph	0	0	0	0	0	0	0	0	0	0	0	0	0	0	0	0	0.000639337	0	0	0	0	0	0	0	0	0	0	0
0485fca4b2de0d63a675401a324e9ed6	Bacteria	Proteobacteria	Deltaproteobacteria	Bdellovibrionales	Bdellovibrionaceae	Bdellovibrio	uncultured bacterium	B8702_Bdellovibrio	Oligotroph	0	0	0	0	0	0	0	0	0	0	0	0	0	0	0	0	0	0	0	0	0	0	0	0.000114199	1.96258e-05	0	0	0
052ea4717c61e6c48082ab981ad339fd	Bacteria	Chloroflexi	#N/A	#N/A	#N/A	#N/A	#N/A	B5813_o_NA	Oligotroph	0	0	0	0.000156679	0	0	0	0	0	0	0	0	0	0	0	0	0	0	0	0	0	0	0	0	2.3987e-05	0.000113675	0	0
05a2c33167f8610b17f2c83ef46966b1	Bacteria	Omnitrophicaeota	Omnitrophia	Omnitrophales	Omnitrophaceae	Candidatus Omnitrophus	uncultured Omnitrophica bacterium	B13855_Candidatus Omnitrophus	Oligotroph	0	0	0	0	0	0	0	0	0	0	0	0	0	0	0	0	0	0	0	0	0	0	0	0	0	0	5.93297e-05	0
05ebd6dcb3a21df1cff69860cf1d6995	Bacteria	Proteobacteria	Deltaproteobacteria	Myxococcales	mle1-27	metagenome	metagenome	B9904_metagenome	Oligotroph	3.03464e-05	0	8.05773e-05	0	1.67142e-05	0	0	0	0	0	0	0	0	0	0	0	8.27621e-06	0	0	0	0	0	0	0	0	0	1.0987e-05	0
0655ede98eeafaae8f84e27408afb5ea	Bacteria	Chloroflexi	Anaerolineae	SBR1031	A4b	uncultured bacterium	uncultured bacterium	B6341_uncultured bacterium	Oligotroph	0	0	0	0	0	0	0	0	0	0	0	0	0	0	0	0	0	6.37572e-05	2.77711e-05	0	0	0	0	0	0.000185354	2.54497e-05	0	0
070f9beb51f45395e706a488cc3ecfdb	Bacteria	Proteobacteria	Deltaproteobacteria	Myxococcales	Nannocystaceae	#N/A	#N/A	B13641_f_Nannocystaceae	Oligotroph	0	0	0	0	0	5.11461e-05	0	0	0	0	0	0	0	0	0	0	0	0	0	0	0	0	0	0	0	0	0	0
08489954860b0e94f092f03e5908952f	Bacteria	Omnitrophicaeota	#N/A	#N/A	#N/A	#N/A	#N/A	B5685_o_NA	Oligotroph	0	0	0	0	2.8653e-05	0.000160745	0	0	0	0	0	0	0	0	0	0	0	0	0	0	0.000173182	0	0	0	0	0	0	0
08648d0e4893b112b59886324730cb5d	Bacteria	Chloroflexi	Chloroflexia	Chloroflexales	Roseiflexaceae	#N/A	#N/A	B14790_f_Roseiflexaceae	Oligotroph	0	0	0	0	3.34284e-05	0	0	0	0	0	0	0	0	0	0	0	0	0	0	0	0	0	0	0	0	0	1.75792e-05	0
087230f818953d466cf39c1aa01fdb50	Bacteria	Proteobacteria	Deltaproteobacteria	Myxococcales	Archangiaceae	Anaeromyxobacter	uncultured proteobacterium	B5686_Anaeromyxobacter	Oligotroph	0	0	0	0	0	0	0	0.000114995	0	0	0	0	0	0	0	0	6.20716e-05	0	0	0	0	0	0	0	0	0	0.000184581	0
08b1aa574139b8ef31d243381e443dea	Bacteria	Patescibacteria	Microgenomatia	Candidatus Amesbacteria	#N/A	#N/A	#N/A	B19199_o_Candidatus Amesbacteria	Oligotroph	0	0	0	0	4.77549e-06	0	0	0	0	0	0	0	0	0	0	0	0	0	0	0	0	0	0	0	0	8.48323e-06	0	0
08c46440ad2dcf882a67ce79829b8304	Bacteria	Chloroflexi	Ktedonobacteria	Ktedonobacterales	JG30-KF-AS9	#N/A	#N/A	B10937_f_JG30-KF-AS9	Oligotroph	0	0	0	0	0	0	0	4.47203e-05	0	0	0	0	0	0	0	0	0	0	0	0	0	4.57577e-06	0	0	0	0	5.71323e-05	0
08d945673dc4273b0f47f96d5247fc04	Bacteria	Planctomycetes	Planctomycetacia	Gemmatales	Gemmataceae	uncultured	uncultured bacterium	B9321_uncultured	Oligotroph	0	0	4.53248e-05	0	2.8653e-05	0	1.31344e-05	0	0	0	0	0	0	0	0	0	0	0	0	0	0	0	0	0	0	2.71463e-05	3.73557e-05	0
092052a928d95b8886238edc882bbf5c	Bacteria	#N/A	#N/A	#N/A	#N/A	#N/A	#N/A	B15723_o_NA	Oligotroph	0	0	0	0	9.55098e-06	9.13324e-06	0	0	0	0	0	0	0	0	0	0	1.86215e-05	0	0	0	0	0	0	0	0	0	0	0
09218d5ee81fae95eee856a0a5473251	Bacteria	Chloroflexi	Anaerolineae	SBR1031	#N/A	#N/A	#N/A	B10604_o_SBR1031	Oligotroph	2.1009e-05	2.13466e-05	0	0	1.19387e-05	0	0	0	0	0	0	0	0	0	0	0	1.86215e-05	0	0	0	0	0	0	0	2.18064e-05	1.52698e-05	0	0
0b2a08bb18440c5db26162aaf24c0aad	Bacteria	Nitrospirae	Thermodesulfovibrionia	uncultured	uncultured bacterium	uncultured bacterium	uncultured bacterium	B11226_uncultured bacterium	Oligotroph	0	0	0	0	5.73059e-05	4.01862e-05	0	0	0	0	0	0	0	0	0	0	0	0	0	0	0	0	0	0	0	0	0	0
0c7f2b38358b3df2fedcba68ebee3bde	Bacteria	Proteobacteria	Alphaproteobacteria	Acetobacterales	#N/A	#N/A	#N/A	B11033_o_Acetobacterales	Oligotroph	0	0	0	0	9.55098e-06	0	5.69156e-05	0	0	0	0	0	0	0	0	0	1.03453e-05	0	0	0	0	0	0	8.15706e-06	0	1.35732e-05	0	0
0c874bf7f324a33ee3a3302129f35331	Bacteria	Planctomycetes	Phycisphaerae	Tepidisphaerales	WD2101 soil group	uncultured Planctomycetia bacterium	uncultured Planctomycetia bacterium	B8318_uncultured Planctomycetia bacterium	Oligotroph	0	0	0	0	0	0	0	0	0	0	0	0	0	0	0	0	0	0	0	0	0	0	0	2.28398e-05	0.000111213	0	4.61453e-05	0
0c9d4afe3b83b4291761bbc1428c803a	Bacteria	Planctomycetes	Phycisphaerae	Tepidisphaerales	WD2101 soil group	#N/A	#N/A	B2216_f_WD2101 soil group	Oligotroph	0	0.000137783	0	0.00023785	0	0.000199105	0.000212339	0.000195918	0	0	0	0	0	0	0	0	0.000395189	0	0	0	0	0	0	0	0	0	0	0.000100098
0cb01e46216f0f675908a62fced37947	Bacteria	Patescibacteria	Parcubacteria	Candidatus Azambacteria	Parcubacteria bacterium C7867-005	Parcubacteria bacterium C7867-005	Parcubacteria bacterium C7867-005	B11564_Parcubacteria bacterium C7867-005	Oligotroph	0	0	0	0	1.9102e-05	0	0	3.19431e-05	0	0	0	0	0	0	0	0	4.13811e-05	0	0	0	0	0	0	0	0	0	0	0
0cd08b1bd5d9b17bdf0576fe84de9ad9	Bacteria	Bacteroidetes	Bacteroidia	Chitinophagales	37-13	#N/A	#N/A	B18428_f_37-13	Oligotroph	0	0	0	0	2.14897e-05	0	0	0	0	0	0	0	0	0	0	0	0	0	0	0	0	0	0	0	0	0	0	0
0cfc134bee800583f109cbe2bf0ca6ee	Bacteria	Acidobacteria	Subgroup 25	uncultured Acidobacteria bacterium	uncultured Acidobacteria bacterium	uncultured Acidobacteria bacterium	uncultured Acidobacteria bacterium	B6647_uncultured Acidobacteria bacterium	Oligotroph	0	0	0	0	0	0	0	0	0	0	0	0	0	0	0	0	5.58644e-05	0	0	0	0	0	0	0	0	0.000173058	0	0
0df4a41aa06a1c6da2c30557182b578d	Bacteria	Planctomycetes	OM190	uncultured bacterium	uncultured bacterium	uncultured bacterium	uncultured bacterium	B16488_uncultured bacterium	Oligotroph	0	0	0	0	7.16324e-06	2.19198e-05	0	0	0	0	0	0	0	0	0	0	0	0	0	0	0	0	0	0	0	0	0	0
0ecaf813a118ab10e9cff490d0cf1321	Bacteria	Kiritimatiellaeota	Kiritimatiellae	WCHB1-41	uncultured Verrucomicrobia bacterium	uncultured Verrucomicrobia bacterium	uncultured Verrucomicrobia bacterium	B8319_uncultured Verrucomicrobia bacterium	Oligotroph	0	0	0	0	8.83466e-05	0	0	8.30521e-05	0	0	0	0	0	0	0	0	2.06905e-05	0	0	0	0	0	0	0	0	0	0	0
0ee522d48f461cd13b54bf436ce9a357	Bacteria	Chloroflexi	Dehalococcoidia	Dehalococcoidales	uncultured	uncultured bacterium	uncultured bacterium	B7542_uncultured bacterium	Oligotroph	0	0	0	0	6.44691e-05	0	0	0	0	0	0	0	0	0	0	0	0	0	0	0	0	0	0	0	0	0	0.000167002	0
0f4f6bb9d81c5f7dcbc21121ceabcce2	Bacteria	Acidobacteria	Subgroup 22	#N/A	#N/A	#N/A	#N/A	B3005_o_NA	Oligotroph	0	0	0	0	5.49182e-05	0	0	0	0.000231435	0	0	0	0	0	0	0	0.000434501	0	0	0	0	0	0	3.58911e-05	3.92515e-05	0	5.93297e-05	0.000134174
10afdf628a360cd36d1de526afcacf8d	Bacteria	#N/A	#N/A	#N/A	#N/A	#N/A	#N/A	B20639_o_NA	Oligotroph	0	0	0	0	4.77549e-06	3.65329e-06	0	0	0	0	0	0	0	0	0	0	0	0	0	0	0	0	0	0	0	0	0	0
10e398146accd174d7fe23c3cde0d209	Bacteria	Patescibacteria	Saccharimonadia	Saccharimonadales	uncultured bacterium	uncultured bacterium	uncultured bacterium	B11678_uncultured bacterium	Oligotroph	0	0	0	0	0	2.73997e-05	0	0	0	0	0	0	0	0	0	0	0	0	0	0	0	0	0	3.42596e-05	1.30838e-05	0	0	0
11233b291f37bf008a7029adf8e5f9f9	Bacteria	Proteobacteria	Deltaproteobacteria	Bdellovibrionales	Bdellovibrionaceae	Bdellovibrio	metagenome	B3025_Bdellovibrio	Oligotroph	0	3.68714e-05	0.000113312	0.000275604	0	0	0	0.000123513	0	0	0	0	0	0	0	0	0	3.18786e-05	0	3.98512e-05	0	0	0	0	5.01547e-05	0.000227351	0	0
117d04e08c4315ec4f332404caf8d71f	Bacteria	Patescibacteria	ABY1	Candidatus Falkowbacteria	Candidatus Falkowbacteria bacterium GW2011_GWA2_41_14	Candidatus Falkowbacteria bacterium GW2011_GWA2_41_14	Candidatus Falkowbacteria bacterium GW2011_GWA2_41_14	B17388_Candidatus Falkowbacteria bacterium GW2011_GWA2_41_14	Oligotroph	0	0	0	0	0	0	0	0	0	0	0	0	0	0	0	0	0	0	0	0	0	0	0	0	0	0	2.63688e-05	0
12197fa46e996bbd80b33e4cfa2dda8a	Bacteria	Patescibacteria	Saccharimonadia	Saccharimonadales	uncultured bacterium	uncultured bacterium	uncultured bacterium	B13479_uncultured bacterium	Oligotroph	0	0	0	0	0	2.92264e-05	0	0	0	0	0	0	0	0	0	0	0	0	0	0	0	0	0	2.12084e-05	0	0	0	0
125e970c793d2b5a33bca80a95ff9618	Bacteria	Cyanobacteria	Oxyphotobacteria	Nostocales	Nostocaceae	#N/A	#N/A	B6559_f_Nostocaceae	Oligotroph	0	0	0	0	0	0	0	0	0	0	0	0	0	0	0	0	0	0	0	0	0	0	0	0	0	0	0.000248306	4.04652e-05
12a33989cd84672a9d06b13e90eef938	Bacteria	Omnitrophicaeota	uncultured Banisveld landfill bacterium BVC56	uncultured Banisveld landfill bacterium BVC56	uncultured Banisveld landfill bacterium BVC56	uncultured Banisveld landfill bacterium BVC56	uncultured Banisveld landfill bacterium BVC56	B1982_uncultured Banisveld landfill bacterium BVC56	Oligotroph	0	0.00032214	0	0.000179331	0.000183856	0.00031601	0.000253931	7.24044e-05	0	0	0	0	4.28338e-05	7.13059e-05	0.000225458	4.22025e-05	0	0	0	0	0	0	0	0	0	2.03598e-05	0	0
12dcea9af51506077e73440656582c91	Bacteria	Chloroflexi	Chloroflexia	Chloroflexales	Roseiflexaceae	uncultured	uncultured soil bacterium	B10853_uncultured	Oligotroph	0	0	0	0	4.29794e-05	1.64398e-05	0	0	0	0	0	0	0	0	0	0	4.75882e-05	0	0	0	0	0	0	0	0	0	0	0
13e5881b8031542bf4b2b26ac15cbbe4	Bacteria	Chloroflexi	Anaerolineae	SBR1031	anaerobic digester metagenome	anaerobic digester metagenome	anaerobic digester metagenome	B13863_anaerobic digester metagenome	Oligotroph	0	0	0	0	9.55098e-06	2.19198e-05	0	0	0	0	0	0	0	0	0	0	0	0	0	0	0	0	0	0	2.3987e-05	0	0	0
13fac62bf97846a139eef1b14ec960b5	Bacteria	Actinobacteria	Coriobacteriia	CG2-30-50-142	Actinobacteria bacterium CG2_30_50_142	Actinobacteria bacterium CG2_30_50_142	Actinobacteria bacterium CG2_30_50_142	B6670_Actinobacteria bacterium CG2_30_50_142	Oligotroph	0	0	0	0	0	3.65329e-05	6.78609e-05	0.000146938	0	0	0	0	0	0	0	0	1.65524e-05	0	0	0	0	0	0	0	0	0	0	0
14db7473f8fa077e81448cc3f90a48d8	Bacteria	Patescibacteria	Saccharimonadia	Saccharimonadales	wastewater metagenome	wastewater metagenome	wastewater metagenome	B12743_wastewater metagenome	Oligotroph	0	0	0	0	0	0	6.12937e-05	0	0	0	0	0	0	0	0	0	0	0	0	0	0	0	0	6.52565e-06	0	0	4.39479e-06	0
156a73034591ca7770f8924c478b12c0	Bacteria	Chloroflexi	Chloroflexia	Chloroflexales	Roseiflexaceae	uncultured	#N/A	B1255_uncultured	Oligotroph	0	0	0	0	0.00121059	0.000851218	0.000179503	9.79588e-05	1.16887e-05	0	1.18804e-05	5.03114e-06	0	0	0	2.11013e-05	0	0	0.000425823	0.000478214	0	4.11819e-05	0	0	1.09032e-05	0	0	0
171fa51be16491bd9e0610b70d405f0a	Bacteria	Proteobacteria	Deltaproteobacteria	Myxococcales	#N/A	#N/A	#N/A	B3241_o_Myxococcales	Oligotroph	2.56777e-05	7.18023e-05	3.52526e-05	5.47432e-05	0	0	0.000105075	0	0	4.04475e-05	0	0	0	0	0	0	0	4.32638e-05	0	0	0	8.92275e-05	0	0	0	0	0.000408716	0
17ade4648a3b771dc49ce2a5611628ca	Bacteria	WOR-1	uncultured bacterium	uncultured bacterium	uncultured bacterium	uncultured bacterium	uncultured bacterium	B10605_uncultured bacterium	Oligotroph	0	0	0	0	0	0	0	0	0	0	0	0	0	0	0	0	0	0	0	0	9.16847e-05	0	0	0	0	0	3.73557e-05	0
17debb9044b72179c6e2b10bec5f0249	Bacteria	Spirochaetes	MVP-15	uncultured bacterium	uncultured bacterium	uncultured bacterium	uncultured bacterium	B17764_uncultured bacterium	Oligotroph	0	0	0	0	0	0	0	0	0	0	0	0	0	0	0	0	0	0	0	0	0	0	0	0	0	5.08994e-06	1.75792e-05	0
1807c5b71c2bd24c858f220783c7278a	Bacteria	Chloroflexi	Chloroflexia	Chloroflexales	Roseiflexaceae	uncultured	uncultured bacterium	B8078_uncultured	Oligotroph	0	0	0	0	4.53672e-05	0	0	0	0	0	0	0	0	0	0	0	7.24168e-05	0	0	0	0	0	0	0	6.32386e-05	0	1.75792e-05	0
184fb11e2c965f36fc7395f9ecfa3d95	Bacteria	Chloroflexi	Anaerolineae	RBG-13-54-9	#N/A	#N/A	#N/A	B524_o_RBG-13-54-9	Oligotroph	0.00112982	0.00202599	0.00131945	0.00238794	0.000238775	0.000255731	0.00035025	0.000466369	0	0	0	0	0	0	0.000101456	0.000784583	0	0	0	0.000144723	0	0.000130409	0.000183066	0	0.00030747	0.000162878	0.000314228	0
185bf10a19b0446a6be090f45d5ed8d6	Bacteria	#N/A	#N/A	#N/A	#N/A	#N/A	#N/A	B1523_o_NA	Oligotroph	7.46988e-05	5.04557e-05	9.82036e-05	0.000351112	0.000105061	0.000231984	2.62687e-05	0	7.0132e-05	0	0	0.000125779	0	0	9.58197e-05	0	0.000169662	0.00026186	4.85994e-05	5.03383e-05	3.8202e-05	0	6.75599e-05	0	0.000207161	0.000390229	0	0
19534ac0fccfcc6c25d7941c922fe591	Bacteria	Proteobacteria	Gammaproteobacteria	Diplorickettsiales	Diplorickettsiaceae	uncultured	gamma proteobacterium WY1	B3439_uncultured	Oligotroph	0	0	0	0	6.92446e-05	0.000323317	0	0	0	0.000156734	0	0	0	0	0	0	0	0	0	0.000153112	0	0	0	0	0	0	0	0
19d31d068aafd848e68c4faff86f07e3	Bacteria	Nitrospirae	Thermodesulfovibrionia	uncultured	#N/A	#N/A	#N/A	B8320_o_uncultured	Oligotroph	0	0	0	0	0	0	0	5.1109e-05	0	0	0	0	0	0	0	0	0	0	0	0	0	0	0	0.000101148	0	0	0	0
1a2b3fb1ad5a972af59e9c76acdc0aa3	Bacteria	Proteobacteria	Alphaproteobacteria	#N/A	#N/A	#N/A	#N/A	B15245_o_NA	Oligotroph	0	0	0	0	1.19387e-05	0	0	0	0	0	0	0	0	0	0	0	6.20716e-06	0	0	0	0	0	0	1.95769e-05	0	0	0	0
1a497b3bdac6f9caff355a9c3a07cb92	Bacteria	Proteobacteria	Deltaproteobacteria	Sva0485	uncultured Spirochaetales bacterium	uncultured Spirochaetales bacterium	uncultured Spirochaetales bacterium	B2783_uncultured Spirochaetales bacterium	Oligotroph	0	0	0.000304683	0	0	0	0.000291145	0.000114995	0	0	0	0	0	0	0	0	0	0.000227704	0	0	0	0	0	0.000102779	0.000115574	0	0	0
1be262857b0a20871e88cc8e17288ed5	Bacteria	Chloroflexi	Anaerolineae	RBG-13-54-9	#N/A	#N/A	#N/A	B157_o_RBG-13-54-9	Oligotroph	0	0	0	0	0.000458447	0.00124029	0.0031807	0.00452953	0	0	0	0	0.000254748	0.000415037	9.01833e-05	0	3.51739e-05	0	0	0	0.000825162	0.00199732	0.00143401	0.00138996	0.00607308	0.00807434	0.00330269	0
1d74f0da2a0148f64495f72e3ac65c54	Bacteria	Proteobacteria	Deltaproteobacteria	Oligoflexales	Oligoflexaceae	Silvanigrella	#N/A	B13657_Silvanigrella	Oligotroph	1.16717e-05	0	0	0	4.05917e-05	0	0	1.27772e-05	0	0	0	0	0	0	0	0	0	0	0	0	0	0	0	0	0	0	0	0
1df38cb663df3d4ce5aefd7e25c7958c	Bacteria	Planctomycetes	Phycisphaerae	mle1-8	uncultured bacterium	uncultured bacterium	uncultured bacterium	B9002_uncultured bacterium	Oligotroph	0	0	0	0	0	0	0	0	0	0	0	0	0	0	0	0	0.00015311	0	0	0	0	0	0	0	0	0	0	0
1e7695807f110631794c9420f07c11ed	Bacteria	Chloroflexi	Ktedonobacteria	Ktedonobacterales	JG30-KF-AS9	uncultured Thermosporothrix sp.	uncultured Thermosporothrix sp.	B9835_uncultured Thermosporothrix sp.	Oligotroph	0	0	0	0	0	0	0	0	0	0	0	0	0	0	0	0	0	4.55409e-05	0	0	0	0	0	0	6.32386e-05	0	2.85662e-05	0
1e86916dd0ef164ced178f1eaedf537d	Bacteria	Patescibacteria	ABY1	Candidatus Magasanikbacteria	uncultured bacterium	uncultured bacterium	uncultured bacterium	B5815_uncultured bacterium	Oligotroph	0	6.59805e-05	0	0	4.77549e-05	0.000129692	0	0	0	0	0	0	0	0	0	0	1.24143e-05	0	0	0	0	0	0	0	2.83483e-05	2.8843e-05	0	0
1f4e426dcc4ccf5740f30e33649f754c	Bacteria	#N/A	#N/A	#N/A	#N/A	#N/A	#N/A	B9189_o_NA	Oligotroph	0	0	1.51083e-05	1.69893e-05	2.14897e-05	0	0	1.70363e-05	0	0	0	1.50934e-05	0	0	0	0	2.27596e-05	0	0	0	0	0	0	0	0	0	4.17505e-05	0
1fcb61266115d83881f01f6f07cb92f8	Bacteria	Proteobacteria	Deltaproteobacteria	Desulfarculales	Desulfarculaceae	uncultured	uncultured soil bacterium	B2772_uncultured	Oligotroph	0	0	0	0	0	0	0	0	0	0	0	0	0	0	0	0	0.00109246	0	0	0	0	0	0	0	0	0	0	0
1fe06fec72d0666d21e0d3ae8331af8d	Bacteria	Chloroflexi	Anaerolineae	SBR1031	A4b	uncultured bacterium	uncultured bacterium	B10331_uncultured bacterium	Oligotroph	0	0	0	0	0	0	0	0	0	0	0	0	0	0	0	0	4.13811e-05	0	2.08283e-05	0	0	0	0	0	5.01547e-05	6.78659e-06	0	0
2110414f44c30833ea4ab06a3b1502fe	Bacteria	Proteobacteria	Gammaproteobacteria	Coxiellales	Coxiellaceae	Coxiella	uncultured Coxiellaceae bacterium	B6290_Coxiella	Oligotroph	0	0	0	0	0	0	0	0	0	0	0	0	0	0	0	0	0	0	0	0	0.000104419	0	0	0	0	0	0.000221937	0
211f079da7d9c9d03cd59352d25037ad	Bacteria	Proteobacteria	Deltaproteobacteria	SAR324 clade(Marine group B)	uncultured bacterium	uncultured bacterium	uncultured bacterium	B11569_uncultured bacterium	Oligotroph	2.80121e-05	0	0	0	7.16324e-06	3.47063e-05	0	0	0	0	0	0	0	0	0	0	1.86215e-05	0	0	0	0	0	0	0	0	0	0	0
21257fc69d031cdeebebc96461565489	Bacteria	Patescibacteria	ABY1	Candidatus Falkowbacteria	uncultured bacterium	uncultured bacterium	uncultured bacterium	B19652_uncultured bacterium	Oligotroph	0	0	0	0	0	3.65329e-06	0	0	0	0	0	0	0	0	0	0	0	0	0	0	0	0	0	0	0	6.78659e-06	0	0
21ea74416bd0de98fed3a9b5f1b4ab2f	Bacteria	Elusimicrobia	Elusimicrobia	MVP-88	uncultured bacterium	uncultured bacterium	uncultured bacterium	B9004_uncultured bacterium	Oligotroph	0	0	0	0	0	0	0	0	0	0	0	0	0	0	0	0	0	0	0	0	0	0	0	5.5468e-05	0	0	8.78959e-05	0
21eeed5deab8e8d5b80f05c9af929695	Bacteria	Verrucomicrobia	Verrucomicrobiae	Verrucomicrobiales	Verrucomicrobiaceae	Roseimicrobium	uncultured Verrucomicrobia bacterium	B12327_Roseimicrobium	Oligotroph	0	0	0	0	8.83466e-05	0	0	0	0	0	0	0	0	0	0	0	0	0	0	0	0	0	0	0	0	0	0	0
21efdecc9e20bf99123fe689ae8e9ffd	Bacteria	Armatimonadetes	DG-56	uncultured bacterium	uncultured bacterium	uncultured bacterium	uncultured bacterium	B4285_uncultured bacterium	Oligotroph	0	0	0	6.04063e-05	0	7.67192e-05	0	0	0	0	0	0	0	0.000118843	0	0	0.000165524	6.83113e-05	0	0	0	0	0	0	0	0	3.29609e-05	0
233fa7297fe14aba7411ba6916ffdbe6	Bacteria	Proteobacteria	Gammaproteobacteria	Diplorickettsiales	Diplorickettsiaceae	uncultured	#N/A	B11936_uncultured	Oligotroph	0	0	0	0	0	0	0	0	0	0	0	0	0	0	0	0	0	0	1.38855e-05	0	0	0	0	0	7.41418e-05	0	0	0
248524af71715b43570e0385f484ab2d	Bacteria	Proteobacteria	Alphaproteobacteria	Paracaedibacterales	Paracaedibacteraceae	Candidatus Paracaedibacter	#N/A	B7633_Candidatus Paracaedibacter	Oligotroph	6.76958e-05	0	4.28067e-05	0	0	0	0	0	0	0	0	0	0	0	0	0	0	0	0	0	0	0	0	0	0	0	0.000120857	0
2731fcce7d9e7a44cc8b5123a2b49e29	Bacteria	Chloroflexi	Anaerolineae	Anaerolineales	Anaerolineaceae	RBG-16-58-14	uncultured bacterium	B1396_RBG-16-58-14	Oligotroph	0	0	0	0	0	0	0	0	0	0	0	8.04983e-05	0	0	0	0	0.000405534	0	0	0	0	0	0.000651626	0.0012774	0	4.75061e-05	0	0
28a2640bf2f4eefc87ac6f666f6d0af2	Bacteria	Gemmatimonadetes	Gemmatimonadetes	Gemmatimonadales	Gemmatimonadaceae	#N/A	#N/A	B12748_f_Gemmatimonadaceae	Oligotroph	0	0	0	0	5.73059e-05	0	2.18906e-05	0	0	0	0	0	0	0	0	0	0	0	0	0	0	0	0	0	0	0	0	0
2afad842c88b3184817966ce9986d974	Bacteria	Proteobacteria	Deltaproteobacteria	Myxococcales	Haliangiaceae	Haliangium	#N/A	B8655_Haliangium	Oligotroph	0	0	0	0	0.00019102	0	0	0	0	0	0	0	0	0	0	0	0	0	0	0	0	0	0	0	0	0	0	0
2b1582b595863720db66670c3ed036b1	Bacteria	Proteobacteria	Deltaproteobacteria	Oligoflexales	0319-6G20	uncultured delta proteobacterium	uncultured delta proteobacterium	B17780_uncultured delta proteobacterium	Oligotroph	0	0	0	0	0	0	0	0	0	0	0	0	0	0	0	0	0	0	0	0	0	0	0	0	6.54192e-06	0	1.75792e-05	0
2bc584e705404b5b8a9d07db8976bf6a	Bacteria	Planctomycetes	vadinHA49	uncultured Antarctic bacterium LB3-13	uncultured Antarctic bacterium LB3-13	uncultured Antarctic bacterium LB3-13	uncultured Antarctic bacterium LB3-13	B15750_uncultured Antarctic bacterium LB3-13	Oligotroph	0	0	0	0	3.10407e-05	0	0	0	0	0	0	0	0	0	0	0	0	0	0	0	0	0	0	0	0	0	1.0987e-05	0
2c3cb34f4d79c7a9164bc7bb582ba3a2	Bacteria	Chloroflexi	Anaerolineae	SBR1031	uncultured bacterium	uncultured bacterium	uncultured bacterium	B592_uncultured bacterium	Oligotroph	0	0	0	0	0.000417856	0.00028313	0.000328359	0.000270452	0	0	0	0	0.000919799	0.000427836	7.89104e-05	0.00028199	0.000670373	3.41556e-05	0.000180512	4.82409e-05	0.000331084	0	0.00107006	0.00128229	0.000621482	0.000542927	0.000791063	8.09304e-05
2ca96950b204c6880a39fc8e7fb076b7	Bacteria	Proteobacteria	Gammaproteobacteria	Diplorickettsiales	Diplorickettsiaceae	uncultured	#N/A	B8370_uncultured	Oligotroph	0	0	0	0	4.29794e-05	0	8.09952e-05	0	0	0	0	0	0	0	0	0	0	0	0	0	0	0	0	0	0	2.3753e-05	0	3.4076e-05
2ce382016f576902f4bb340d1c1953c4	Bacteria	Chlamydiae	Chlamydiae	Chlamydiales	Parachlamydiaceae	Neochlamydia	#N/A	B15518_Neochlamydia	Oligotroph	0	0	0	0	0	0	0	0	0	0	0	0	0	0	0	0	0	0	0	0	0	0	0	0	1.09032e-05	0	3.07636e-05	0
2d2bd94291fec6b08d649948eca3a431	Bacteria	Omnitrophicaeota	uncultured bacterium	uncultured bacterium	uncultured bacterium	uncultured bacterium	uncultured bacterium	B4896_uncultured bacterium	Oligotroph	0	0	0	0	0	6.94126e-05	7.00499e-05	0	0	0	0	0	0	0	0	5.56306e-05	0	0	0	0	0	0	0	0	0	0	0.000252701	0
2d7d8a7b17fa492049de53bb6ea91787	Bacteria	Lentisphaerae	Lentisphaeria	Victivallales	Arctic95B-14	uncultured deep-sea bacterium	uncultured deep-sea bacterium	B19674_uncultured deep-sea bacterium	Oligotroph	0	0	0	0	4.77549e-06	0	0	0	0	0	0	0	0	0	0	0	0	0	0	0	0	0	0	0	0	0	8.78959e-06	0
2f4185dc5d0dc6c0a9683311aad334b8	Bacteria	Proteobacteria	Deltaproteobacteria	Myxococcales	bacteriap25	uncultured Geobacter sp.	uncultured Geobacter sp.	B14419_uncultured Geobacter sp.	Oligotroph	0	0	0	0	0	2.19198e-05	0	0	0	0	0	0	0	0	0	0	2.48286e-05	0	0	0	0	0	0	0	0	0	0	0
2fdd96d10870436bb99029812ef2d13d	Bacteria	Bacteroidetes	Bacteroidia	Bacteroidales	SB-5	metagenome	metagenome	B10860_metagenome	Oligotroph	0	0	0	0	0	0	0	0	0	0	0	0	0	0	0	0	0	0	0	0	0	0	0	0	0	2.54497e-05	7.69089e-05	0
301adc7b7c1f6a2daa5d43b72b8813b8	Bacteria	Chloroflexi	KD4-96	#N/A	#N/A	#N/A	#N/A	B806_o_NA	Oligotroph	0.000646612	0.000586062	0	0	0	0.000162572	0.000297712	0.000321561	0	0	0	0	0.000556839	0.000191978	0.000882105	0.000410515	0	0	0.00020134	0.000482409	2.80148e-05	0	7.4098e-05	0	0.000388154	0.00027825	0.000824024	0
31e24f205c7e8474f88a18683ae2b959	Bacteria	Verrucomicrobia	Verrucomicrobiae	Chthoniobacterales	Chthoniobacteraceae	Chthoniobacter	uncultured Verrucomicrobiales bacterium	B3916_Chthoniobacter	Oligotroph	0.000261446	0	0	0	0	0	0	0	0	0	0	0	0	0	0	0	0	0	0	0	0	0	0	0	0	7.63491e-05	0.000329609	0
31e5244236635946255daaddf1d4b049	Bacteria	Patescibacteria	Microgenomatia	Candidatus Woesebacteria	#N/A	#N/A	#N/A	B12478_o_Candidatus Woesebacteria	Oligotroph	0	0	0	0	0	0	0	0	0	0	0	0	0	0	0	0	0	0	0	0	0	0	0	0	0	6.10793e-05	0	0
321bbd3361c86112c9263f2193e9b9f9	Bacteria	Chloroflexi	Anaerolineae	SBR1031	#N/A	#N/A	#N/A	B2420_o_SBR1031	Oligotroph	0	0	0	0	8.83466e-05	0	5.91046e-05	7.66634e-05	0	0	0	0	0	0	0	0	7.8624e-05	0	7.1742e-05	0	0	0	0.00013512	0.000239818	0.000172271	0.000127248	7.03167e-05	0.000161861
3302fa9be5a52dd2accaf3df23a6a292	Bacteria	Bacteroidetes	Ignavibacteria	Kryptoniales	BSV26	#N/A	#N/A	B14046_f_BSV26	Oligotroph	0	0	0	0	0	0	0	0	0	0	0	0	0	0	0	0	0	0	0	0	0	0	0	0	3.27096e-05	0	2.41714e-05	0
330bcaaef26cedc2a5e0e7cae15fce75	Bacteria	Actinobacteria	MB-A2-108	#N/A	#N/A	#N/A	#N/A	B3369_o_NA	Oligotroph	0	0	0	0	0.000107449	0	0	0	0	0	0	0	0	0	0	0	0.000608301	0	0	0	0	0.000100667	0	0	0	0	0	0
34d7d5ddec488da30c7a8051b1c2491b	Bacteria	Verrucomicrobia	Verrucomicrobiae	Pedosphaerales	Pedosphaeraceae	uncultured bacterium	uncultured bacterium	B6814_uncultured bacterium	Oligotroph	0	0	0	0	1.67142e-05	6.7586e-05	0	0	4.67546e-05	0	0	0	0	0	0	0	0	0	0	0	0	0	1.74348e-05	4.73109e-05	1.52645e-05	2.54497e-05	0	0
34ecafb5d033bbf4fec8427c752123d5	Bacteria	Chloroflexi	Anaerolineae	Anaerolineales	Anaerolineaceae	Anaerolinea	uncultured soil bacterium	B1152_Anaerolinea	Oligotroph	0	0.000151367	0.000846062	0.00057386	0	0	0.000201394	0.000581364	0	0	0	0	0.000130756	0.000146269	9.30015e-05	0	0	0	0	0	0.000308162	0	0	0	0	0	0.000892143	0
351d21fd2c59b21b48a4ee08306ed18c	Bacteria	Chloroflexi	Anaerolineae	SBR1031	#N/A	#N/A	#N/A	B9533_o_SBR1031	Oligotroph	0	0	0	0	0.000157591	0	0	0	0	0	0	0	0	0	0	0	0	0	0	0	0	0	0	0	0	0	0	0
3758e566918785a1c5e9aa534fce855f	Bacteria	Armatimonadetes	Chthonomonadetes	Chthonomonadales	#N/A	#N/A	#N/A	B13882_o_Chthonomonadales	Oligotroph	0	0	0	0	3.58162e-05	0	2.62687e-05	0	0	0	0	0	0	0	0	0	0	0	0	0	0	0	0	0	0	0	0	0
380f7b43d277d5c5b878decc340b70de	Bacteria	Bacteroidetes	Bacteroidia	Sphingobacteriales	AKYH767	uncultured bacterium	uncultured bacterium	B11572_uncultured bacterium	Oligotroph	0	0	0	0	0.000102673	0	0	0	0	0	0	0	0	0	0	0	0	0	0	0	0	0	0	0	0	0	0	0
38106b91b95778c80413ed9c7b9b111f	Bacteria	Spirochaetes	Spirochaetia	Spirochaetales	Spirochaetaceae	Spirochaeta 2	uncultured bacterium	B9763_Spirochaeta 2	Oligotroph	0	0	0	0	0	0	0	0	0	0	0	0	0	0	0	0	0	0	0	0	0	0	0	0	0	0	0.000138436	0
38e6dd8248deff3273583b219f5d23d4	Bacteria	Bacteroidetes	Ignavibacteria	Kryptoniales	BSV26	uncultured Chlorobi bacterium	uncultured Chlorobi bacterium	B1367_uncultured Chlorobi bacterium	Oligotroph	0	0	0	0	0.000217285	0.000412822	0	0	0.00010286	0	8.07868e-05	0.00023311	0	0	0	0	0.000949695	6.14802e-05	3.47139e-05	0.000178282	0	0.000274546	0	0	0.000194077	0	3.07636e-05	0.000127785
396356bdd555a1a61fbf3c6bb5254a0f	Bacteria	Chlamydiae	Chlamydiae	Chlamydiales	Parachlamydiaceae	Neochlamydia	uncultured bacterium	B13883_Neochlamydia	Oligotroph	0	0	0	0	1.67142e-05	3.65329e-05	0	0	0	0	0	0	0	0	0	0	0	0	0	0	0	0	0	0	0	0	0	0
396e88f2b37beb2f2475f613554a472e	Bacteria	Verrucomicrobia	Verrucomicrobiae	Pedosphaerales	Pedosphaeraceae	#N/A	#N/A	B2234_f_Pedosphaeraceae	Oligotroph	0	0	0	0	8.59589e-05	0	0	0	0	0	0	0	0	0	0	0	0.000403465	0	0	0	0	0.000203622	0	1.79455e-05	0.000584411	0.000210384	0	0
39a89c1e8e121cf015fa16a2fcfebbd9	Bacteria	Chloroflexi	Anaerolineae	SBR1031	uncultured Gemmatimonadetes bacterium	uncultured Gemmatimonadetes bacterium	uncultured Gemmatimonadetes bacterium	B2759_uncultured Gemmatimonadetes bacterium	Oligotroph	0	0	0	0	0	0	0	0.000357763	0	0	0	0	0	0	0	0	0	0	0	0	0	0	0	0	0	0	0.000797655	0
39c5e2e44603f5ed068e4e59407e38a4	Bacteria	Chloroflexi	Chloroflexia	Chloroflexales	Roseiflexaceae	uncultured	uncultured bacterium	B554_uncultured	Oligotroph	0.0003875	0.000265862	0.000239214	0	0.000179081	6.94126e-05	7.66171e-05	0	2.57151e-05	1.51678e-05	4.98977e-05	0.000172736	0	0	0	0	0.000560713	0.000211765	0.000622535	0.000364953	0	0	0.00104391	0.000849966	0.00212612	0.00142349	0.000158213	0.000600589
3b0f564617b73e73a206776247d80179	Bacteria	Proteobacteria	Gammaproteobacteria	Diplorickettsiales	Diplorickettsiaceae	uncultured	#N/A	B11361_uncultured	Oligotroph	0	0	0	0	0	0	0	0	0	0	0	0	0	0	0	0	0	0	0	0	0	0	0	0	0	0	9.88828e-05	0
3b10447ea379f98c8931ea893d937d4e	Bacteria	Nitrospirae	Thermodesulfovibrionia	uncultured	#N/A	#N/A	#N/A	B613_o_uncultured	Oligotroph	0.00237869	0.00277118	0.000513681	0.00157056	0.000484712	0.00058818	0	0	0	0	0	0	0	0	0	0	0	0.000111575	0	0	0	0	0	0	0	0	0	9.15792e-05
3b2c27398ec58f8dc3092106666fb844	Bacteria	Proteobacteria	Alphaproteobacteria	#N/A	#N/A	#N/A	#N/A	B1521_o_NA	Oligotroph	0	0	0	0	0.000167142	0.000189971	0	0	0	0	0	0	0	0	0	0	0.000771757	4.55409e-05	1.38855e-05	0	0.000328537	0.000153288	0.000141658	0	6.32386e-05	5.42927e-05	0.000672403	4.04652e-05
3bebb815c1cda2b930f15749950c483f	Bacteria	Planctomycetes	Phycisphaerae	MSBL9	GWC2-45-44	uncultured bacterium	uncultured bacterium	B6587_uncultured bacterium	Oligotroph	0	0	0	0	0	0	3.7214e-05	0	0	0	0	0	0	0	0	0	9.10383e-05	0	0	0	0	0	0	2.28398e-05	0	0	0.000123054	0
3cdb48956697acd808527135d8effe19	Bacteria	WS1	uncultured bacterium SJA-43	uncultured bacterium SJA-43	uncultured bacterium SJA-43	uncultured bacterium SJA-43	uncultured bacterium SJA-43	B13335_uncultured bacterium SJA-43	Oligotroph	0	0	0	0	0	0	0	0	0	0	0	0	0	0	0	0	0	0	0	0	0	0	0	0	5.4516e-05	0	1.0987e-05	0
3cdc34ed23c9a034e888aebc6ccbbdbe	Bacteria	Elusimicrobia	Lineage IIb	uncultured bacterium	uncultured bacterium	uncultured bacterium	uncultured bacterium	B10527_uncultured bacterium	Oligotroph	0	0	0	0	0	0	0	0	0	0	0	0	0	0	0	0	0	0	0	0	0	0	0	0	0	0	0.000118659	0
3e2197648366ad3f7fb2ecbff86c2193	Bacteria	Actinobacteria	#N/A	#N/A	#N/A	#N/A	#N/A	B3172_o_NA	Oligotroph	0.000135392	0.000260041	0.00024425	0.000184994	0	0	1.31344e-05	1.06477e-05	0	0	0	0	0	0	0	0	0	3.87097e-05	0	0	0	0	0	0	0	1.01799e-05	6.59219e-06	0
3e647f0113ba3b0e029146576fc201e0	Bacteria	Proteobacteria	Deltaproteobacteria	Myxococcales	bacteriap25	#N/A	#N/A	B6941_f_bacteriap25	Oligotroph	0	0	0	0	4.53672e-05	4.20129e-05	0	0	0	0	0	0	0	0	0	0	1.65524e-05	0	0	0	0	0	5.01251e-05	3.09968e-05	5.88773e-05	0	0	0
3f2133b235be5fdc6b8150c37ce52aff	Bacteria	Proteobacteria	Gammaproteobacteria	Legionellales	Legionellaceae	Legionella	#N/A	B6508_Legionella	Oligotroph	0	0	0	0	0.000143265	2.55731e-05	0	0	0	0	0	0	0	0	3.94552e-05	0	0	0	0	0	0	0	0	0	0	0	0.00010108	0
3f6d887acf9e0fc95eb3011bf7e495f0	Bacteria	Chloroflexi	Chloroflexia	Thermomicrobiales	JG30-KF-CM45	#N/A	#N/A	B1755_f_JG30-KF-CM45	Oligotroph	0	0	0	0	0.000245938	0	0	0	0	6.90978e-05	7.84107e-05	8.38524e-05	0	0	3.10005e-05	0	0	0	3.47139e-05	6.71178e-05	0	0	7.19186e-05	0.000309968	0.000619302	0.000307093	0	0
3fd1d068023d48a369adf03b03b2a563	Bacteria	Chloroflexi	Chloroflexia	Chloroflexales	Chloroflexaceae	FFCH7168	uncultured bacterium	B7635_FFCH7168	Oligotroph	0	0	0	0	8.11834e-05	3.28797e-05	0	0	0	0	0	0	0	0	1.12729e-05	0	1.03453e-05	0	0	0	2.80148e-05	6.86365e-06	0	0	5.66966e-05	0	0	0
3feab7020204cf260b70e622888f7f0f	Bacteria	Chloroflexi	Anaerolineae	ADurb.Bin180	#N/A	#N/A	#N/A	B10441_o_ADurb.Bin180	Oligotroph	0	0	0	0	5.49182e-05	0	0	0	0	0	0	0	0	0	0	0	0	0	0	0	0	0	0	0	4.36128e-05	2.03598e-05	0	0
40755d506fd10f1fde85d4859f97aa00	Bacteria	Elusimicrobia	Elusimicrobia	MD2894-B20	uncultured bacterium	uncultured bacterium	uncultured bacterium	B13031_uncultured bacterium	Oligotroph	0	0	0	0	0	0	0	0	0	0	0	0	0	0	0	0	2.68977e-05	0	0	0	0	9.15154e-06	0	0	0	0	1.53818e-05	1.7038e-05
40ca92dd61126791102c8c83b533dc88	Bacteria	Verrucomicrobia	Verrucomicrobiae	Pedosphaerales	Pedosphaeraceae	uncultured bacterium	uncultured bacterium	B1435_uncultured bacterium	Oligotroph	0	0	0	0	0	0	0.000155423	0	0	0	0	0	0	0	0	0	0.000221389	0	0	0	0	0	0.000662523	0.00043885	0.000488463	0	0.000720746	0
416f5d7474326751a638d40a2d6d3edb	Bacteria	Chlamydiae	Chlamydiae	Chlamydiales	Parachlamydiaceae	Neochlamydia	#N/A	B13181_Neochlamydia	Oligotroph	0	0	0	0	0	0	0	0	0	0	0	0	0	0	0	0	3.10358e-05	0	0	0	0	0	0	0	0	0	3.51583e-05	0
417a9aef604a0606b90f2b174aad41b3	Bacteria	Planctomycetes	Pla4 lineage	uncultured planctomycete	uncultured planctomycete	uncultured planctomycete	uncultured planctomycete	B7289_uncultured planctomycete	Oligotroph	0	0	0	6.98448e-05	0	8.21991e-05	0	0	0	0	0	0	0	0	0	0	0	0	0	0	0	0	0	0	0	4.58095e-05	0	0
419cf7b28ee42af16fb051ffc5336ccd	Bacteria	Proteobacteria	Deltaproteobacteria	Bdellovibrionales	Bdellovibrionaceae	Bdellovibrio	metagenome	B5179_Bdellovibrio	Oligotroph	0	0	0	0	0	0.000213718	0.000111642	0	0	0	0	0	0	0	0	0	5.58644e-05	0	0	0	0	0	0	0	0	0	0	0
422c5e86972ec797d555d6478892b476	Bacteria	Proteobacteria	Deltaproteobacteria	Myxococcales	Polyangiaceae	#N/A	#N/A	B3414_f_Polyangiaceae	Oligotroph	0	0	5.7915e-05	0	0	0.000102292	0	0	0	0	0	0	0	3.29104e-05	0	0	2.89667e-05	8.88047e-05	5.09137e-05	6.50203e-05	0	0	0	0	0.000187535	0.000118765	0	3.83355e-05
4232fc8553ae974afac84ba7c70121f7	Bacteria	#N/A	#N/A	#N/A	#N/A	#N/A	#N/A	B6238_o_NA	Oligotroph	0	0	6.0433e-05	0	9.55098e-05	4.01862e-05	0	0	0	0	0	0	0	0	1.69094e-05	0	0	3.87097e-05	0	0	0	0	0	0	5.4516e-05	0	2.1974e-05	0
42e1728dffa372ca5f0d45b8e45f0533	Bacteria	Spirochaetes	Spirochaetia	Spirochaetales	Spirochaetaceae	Spirochaeta 2	Spirochaetes bacterium pACH87	B16824_Spirochaeta 2	Oligotroph	0	0	0	0	0	0	0	0	0	0	0	0	0	0	0	0	0	0	0	0	0	0	0	0	0	0	3.07636e-05	0
4373514c0e89c8c31e5074bac9a08806	Bacteria	Chloroflexi	SHA-26	#N/A	#N/A	#N/A	#N/A	B8322_o_NA	Oligotroph	0	0	0	0	0	0	0	0	0	0	0	0	0	0	0	0	0	0	0	0	0	0	0	9.13591e-05	0	5.08994e-05	0	0
43ee69d2dbb43d78fd968b198225bfaa	Bacteria	Chloroflexi	Anaerolineae	Caldilineales	Caldilineaceae	#N/A	#N/A	B2284_f_Caldilineaceae	Oligotroph	0	0.000102852	3.27345e-05	4.53047e-05	8.35711e-05	9.8639e-05	7.66171e-05	4.25908e-05	0	0	0	2.85098e-05	4.05794e-05	0	5.07281e-05	8.63233e-05	0	0.000107021	9.71988e-05	2.09743e-05	5.09359e-06	0.000114394	7.4098e-05	1.95769e-05	6.54192e-05	0.000145912	0.000118659	0
43fbab1c5ca9bd66722ee4e1942b50c2	Bacteria	Armatimonadetes	uncultured	uncultured Firmicutes bacterium	uncultured Firmicutes bacterium	uncultured Firmicutes bacterium	uncultured Firmicutes bacterium	B10267_uncultured Firmicutes bacterium	Oligotroph	0	0	0	0	0	0	0	0	0	0	0	0	0	0	0	0	8.27621e-06	0	0	0	0	0	0	0	2.61677e-05	6.95625e-05	0	0
4435b8cb7256af8565b42aa5889369b7	Bacteria	Planctomycetes	Phycisphaerae	Phycisphaerales	Phycisphaeraceae	SM1A02	uncultured bacterium	B4685_SM1A02	Oligotroph	0	0	0	0	5.49182e-05	1.27865e-05	0	0	0	0	0	0	0	0	0	0	0.000142765	0.000193549	0	0	1.01872e-05	2.28788e-05	0	0	3.48902e-05	0	0	3.19462e-05
447d9cbd231dc1e6d15f7dcd5be8bb00	Bacteria	Proteobacteria	Gammaproteobacteria	Diplorickettsiales	Diplorickettsiaceae	uncultured	metagenome	B6181_uncultured	Oligotroph	0	0	0	0	0	0	0	0	0	0	0	0	0	0	0	0	0	0	0	0	0	0	0	0	0.000198438	9.33156e-05	0	0
45f9a36e7f78017e03c052c6bf8d8f27	Bacteria	Bacteroidetes	Ignavibacteria	Kryptoniales	MSB-3C8	uncultured Chloroflexi bacterium	uncultured Chloroflexi bacterium	B5965_uncultured Chloroflexi bacterium	Oligotroph	5.13554e-05	1.9406e-05	5.03608e-05	3.58662e-05	0	0	3.28359e-05	0.000129902	0	0	0	0	0	0	0	0	0	1.82163e-05	0	0	0	0	0	0	0	0	0	0
46daa4e11f0df317b527548bf2df0c52	Bacteria	Chloroflexi	Anaerolineae	RBG-13-54-9	uncultured sludge bacterium A31	uncultured sludge bacterium A31	uncultured sludge bacterium A31	B2424_uncultured sludge bacterium A31	Oligotroph	0.000224096	0.000209585	8.05773e-05	0	0	0	0	0	0	0	0	0	0	0	0	0	0	0.000120683	0	0.0001636	0	0	0	0	0.000172271	0.000205294	0.000153818	0
473b8967b3374530ee5ac1b87f6e77f3	Bacteria	Acidobacteria	Subgroup 25	#N/A	#N/A	#N/A	#N/A	B1964_o_NA	Oligotroph	0.000128389	0	0	0	0.000117	0.000109599	0	0	0	0	0	0	1.57809e-05	0	0	0	0.000647613	0	0	0	0	0	7.4098e-05	0.000158247	0.000200619	0.000201901	0	3.62057e-05
487d614779957290f1a7ae54ea2cec68	Bacteria	Cyanobacteria	Oxyphotobacteria	Leptolyngbyales	Leptolyngbyaceae	JSC-12	cf. Leptolyngbya sp. Greenland_9	B4191_JSC-12	Oligotroph	4.43524e-05	0	0	0	0.000217285	0.000118732	0.000105075	7.66634e-05	0	0	0	0	0	0	0	0	0	0	0	0	0	0	0	0	0	0	3.51583e-05	0
48eee5eeec7ef56dabfe38be2d7da415	Bacteria	#N/A	#N/A	#N/A	#N/A	#N/A	#N/A	B4779_o_NA	Oligotroph	0	0	0	0	4.05917e-05	0	1.53234e-05	6.38862e-05	0	0	0	0	0	0	0	0	0.000124143	0.000118406	0	0	0	0	0	0	2.61677e-05	0	9.66854e-05	0
4941f87ae544096b36c080ddf2dda85b	Bacteria	Acidobacteria	Subgroup 22	uncultured organism	uncultured organism	uncultured organism	uncultured organism	B16552_uncultured organism	Oligotroph	0	0	0	0	3.58162e-05	0	0	0	0	0	0	0	0	0	0	0	0	0	0	0	0	0	0	0	0	0	0	0
494e8c42fc320e89b167c0fcf9093595	Bacteria	Proteobacteria	Deltaproteobacteria	Oligoflexales	0319-6G20	uncultured Roseobacter sp.	uncultured Roseobacter sp.	B15055_uncultured Roseobacter sp.	Oligotroph	7.00301e-06	0	0	0	0	0	0	0	0	0	0	0	0	0	0	0	0	0	0	0	0	0	0	0	0	0	3.95531e-05	0
4982733bf260e1887e9f342b62425f8b	Bacteria	Proteobacteria	Gammaproteobacteria	#N/A	#N/A	#N/A	#N/A	B13681_o_NA	Oligotroph	0	0	0	0	0	0	0	0	0	0	0	0	0	0	0	0	0	0	0	0	0	0	0	0	0	0	6.15271e-05	0
49bcbb6cfab43368779df963f13532cc	Bacteria	Proteobacteria	#N/A	#N/A	#N/A	#N/A	#N/A	B9144_o_NA	Oligotroph	0	0	0	0	0	0	1.53234e-05	0	0	0	0	0	0	0	0	0	0	0	3.00853e-05	0	0	0	0	0	0	0	0.000114265	0
4b24f66c107d0a5ea6a4b3d702ad873c	Bacteria	Proteobacteria	Alphaproteobacteria	#N/A	#N/A	#N/A	#N/A	B2831_o_NA	Oligotroph	0	0	0	0	0.000408305	0.000230158	5.25374e-05	0	0	0	0	0	0	0	0	0	0.000184146	4.09868e-05	0	7.76049e-05	0	3.20304e-05	0	0	6.75998e-05	0	0	0
4c959e141a172560b1448e528fb7675b	Bacteria	Chloroflexi	Chloroflexia	Thermomicrobiales	JG30-KF-CM45	uncultured soil bacterium	uncultured soil bacterium	B1376_uncultured soil bacterium	Oligotroph	0	0	0	6.2294e-05	0.000159979	0	0.000205772	0	0	0	5.9402e-05	0	4.28338e-05	0	0	0	0.000136557	6.60343e-05	9.25703e-05	5.45332e-05	0	0.000105243	0.000257164	0.000463321	0.000252954	0.000188328	0.000301043	0.000383355
4ca02482cc9b75898e5284ab72b7be30	Bacteria	Patescibacteria	CPR2	uncultured bacterium	uncultured bacterium	uncultured bacterium	uncultured bacterium	B6976_uncultured bacterium	Oligotroph	0	0	0	0	0	0	0	3.40726e-05	0	0	0	0	0	0	0	0	0	0	0	0	4.83892e-05	0	0	0.000125619	0	0	1.31844e-05	0
4ca7c4ef7d09c8935346f523cf3e626a	Bacteria	Cyanobacteria	Oxyphotobacteria	Nostocales	Nostocaceae	#N/A	#N/A	B10093_f_Nostocaceae	Oligotroph	0	0	0	0	0	0	0	0	0	0	0	0	0	0	0	0	0	0	0	0	0	0	0	0	0	0	0.000129646	0
4deac5b8e6c348178c3f64712f4fb86e	Bacteria	Planctomycetes	BD7-11	uncultured bacterium	uncultured bacterium	uncultured bacterium	uncultured bacterium	B8374_uncultured bacterium	Oligotroph	1.86747e-05	0	5.03608e-05	0	0	3.65329e-05	0	0	0	0	0	0	0	0	0	0	2.68977e-05	0	0	0	0	0	0	0	0	0	5.27375e-05	0
4df18fa6f9d87ea50d7265cfbb9b73f8	Bacteria	Proteobacteria	Alphaproteobacteria	Rhodospirillales	uncultured	#N/A	#N/A	B9469_f_uncultured	Oligotroph	0	0	0.000105758	0	5.49182e-05	0	0	0	0	0	0	0	0	0	0	0	0	0	0	0	0	0	0	0	4.36128e-06	0	0	0
4f6d1e2725b9581dcae561a3e2ae6b4f	Bacteria	Armatimonadetes	DG-56	uncultured bacterium	uncultured bacterium	uncultured bacterium	uncultured bacterium	B11583_uncultured bacterium	Oligotroph	0	0	0	0	0	0	8.75624e-06	0	0	0	0	0	0	0	0	0	0	0	0	0	3.8202e-05	0	0	3.09968e-05	0	0	1.0987e-05	0
501baf5cc7909e53b6efabcef7a1cc67	Bacteria	Verrucomicrobia	Verrucomicrobiae	Pedosphaerales	Pedosphaeraceae	#N/A	#N/A	B14839_f_Pedosphaeraceae	Oligotroph	0	0	0	0	2.38775e-05	0	0	0	0	0	0	0	0	0	0	0	0	0	0	0	0	0	0	0	0	0	2.63688e-05	0
51562948f8b8093db2afdf16f1018978	Bacteria	Omnitrophicaeota	uncultured bacterium	uncultured bacterium	uncultured bacterium	uncultured bacterium	uncultured bacterium	B1635_uncultured bacterium	Oligotroph	0.000336145	0.000921786	0.00034749	0	0.00026504	0.000253904	0	5.32385e-05	0	0	0	0	0	0	0	0	0	0.000118406	0	0	0	0	0	0	0	0	0	0
536a4e954d11d171802dbb9a559ffb15	Bacteria	Bacteroidetes	Bacteroidia	Chitinophagales	#N/A	#N/A	#N/A	B4716_o_Chitinophagales	Oligotroph	0	0	0	0	9.55098e-05	0	1.31344e-05	0	0	0	0	0	0	0	0	0	7.44859e-05	2.27704e-05	1.15713e-05	0	0	0	0	0	0.000104671	0.000123855	0	1.91677e-05
540b5105d66813906b149efe769cde0e	Bacteria	Elusimicrobia	Elusimicrobia	MVP-88	uncultured bacterium	uncultured bacterium	uncultured bacterium	B4548_uncultured bacterium	Oligotroph	1.63404e-05	0	0	0	0	0	8.97515e-05	0.000163975	0	0	0	0	4.05794e-05	0	0	0	0	0	0	0	0	0	0	0	7.19611e-05	5.93826e-05	6.59219e-05	0
546d62e015f058d1375d4491eb395827	Bacteria	Patescibacteria	WWE3	Candidatus Berkelbacteria bacterium RIFCSPHIGHO2_12_FULL_50_11	Candidatus Berkelbacteria bacterium RIFCSPHIGHO2_12_FULL_50_11	Candidatus Berkelbacteria bacterium RIFCSPHIGHO2_12_FULL_50_11	Candidatus Berkelbacteria bacterium RIFCSPHIGHO2_12_FULL_50_11	B13346_Candidatus Berkelbacteria bacterium RIFCSPHIGHO2_12_FULL_50_11	Oligotroph	0	0	0	0	0	0	1.31344e-05	0	0	0	0	0	0	0	0	0	0	0	0	0	0	0	0	0	1.74451e-05	2.71463e-05	0	0
55200b9bdbce292d917a6b642332618e	Bacteria	Chloroflexi	Anaerolineae	Anaerolineales	Anaerolineaceae	uncultured	#N/A	B1565_uncultured	Oligotroph	0.000259112	0	0	0.000141577	0	0	0.000394031	0.000236379	0	0	0	0	0	0	0	0	0.000194491	0.000102467	0	0	0	0	0	0.000345859	0.000215883	0.000111979	0.000173594	0.000198067
552bf68cc9e66021703b9c0666215a0a	Bacteria	Omnitrophicaeota	uncultured bacterium	uncultured bacterium	uncultured bacterium	uncultured bacterium	uncultured bacterium	B8088_uncultured bacterium	Oligotroph	0	0	0	0	0	0	0	0	0	0	0	0	0	0	0	0	0.000188284	0	0	0	0	0	0	0	0	0	0	0
55b469078458dce4fcc92b2f9875846f	Bacteria	Planctomycetes	Planctomycetacia	Pirellulales	Pirellulaceae	uncultured	uncultured Firmicutes bacterium	B16277_uncultured	Oligotroph	0	0	0	0	0	0	0	0	0	0	0	0	0	0	0	0	1.24143e-05	0	0	0	0	0	0	0	0	0	2.1974e-05	0
569c06e168815698c270a8d9936dc409	Bacteria	Chloroflexi	Anaerolineae	Anaerolineales	Anaerolineaceae	uncultured	uncultured prokaryote	B5363_uncultured	Oligotroph	0	0	0	0	0	0	0	0	0	0	0	0	0	0	0	0	0	0	0	0	0	0	0	0.000119093	0	0.000190024	0	0
569f634adc3db26816966f401698dcf0	Bacteria	Omnitrophicaeota	uncultured bacterium	uncultured bacterium	uncultured bacterium	uncultured bacterium	uncultured bacterium	B8421_uncultured bacterium	Oligotroph	0	0	0	0	0	0	0	0	0	0	0	0	0	0	0	0	0	7.74195e-05	0	0	0	0	0	0	0	0	0.00010987	0
56cce2d826b1dd307cad08c657e4876e	Bacteria	Proteobacteria	Gammaproteobacteria	Piscirickettsiales	Piscirickettsiaceae	Candidatus Endoecteinascidia	uncultured bacterium	B9470_Candidatus Endoecteinascidia	Oligotroph	1.63404e-05	0	0	0	0	0	0	0	4.67546e-06	4.21328e-05	0	0	0	0	0	0	0	0	0	0	0	0	0	0	0	0	7.25141e-05	0
577898c221613c214c42a4cc94d849fe	Bacteria	Actinobacteria	Thermoleophilia	Gaiellales	uncultured	Gaiella sp. EBR4-RS1	Gaiella sp. EBR4-RS1	B5925_Gaiella sp. EBR4-RS1	Oligotroph	6.06928e-05	0	4.28067e-05	0	0	0	0	0	0	0	0	0	0	0	0	0	6.82787e-05	0	0	0	2.03744e-05	0	0	0	4.14322e-05	4.92027e-05	5.49349e-05	0
57d764e746899351af973471ec4f5682	Bacteria	Proteobacteria	Deltaproteobacteria	Oligoflexales	Oligoflexaceae	uncultured	#N/A	B19752_uncultured	Oligotroph	0	0	0	0	1.43265e-05	0	0	0	0	0	0	0	0	0	0	0	0	0	0	0	0	0	0	0	0	0	0	0
57ef6d3a9b9b0b0e67437375ad8b63ad	Bacteria	Proteobacteria	Gammaproteobacteria	#N/A	#N/A	#N/A	#N/A	B18190_o_NA	Oligotroph	0	0	0	0	0	9.13324e-06	0	0	0	0	0	0	0	0	0	0	0	0	0	0	0	0	0	0	1.09032e-05	0	0	0
59a7e6af8f8dc5d6bb5cafbd0df2697b	Bacteria	Proteobacteria	Gammaproteobacteria	Coxiellales	Coxiellaceae	Coxiella	#N/A	B11058_Coxiella	Oligotroph	0	0	0	0	0	0	0	0	0	0	0	0	0	0	0	0	0	0	0	0	0	0	0	0	0	0	0.000105475	0
5a69f990c7b2f4f9b66952e79f3d1f18	Bacteria	Kiritimatiellaeota	Kiritimatiellae	WCHB1-41	uncultured Verrucomicrobia bacterium	uncultured Verrucomicrobia bacterium	uncultured Verrucomicrobia bacterium	B2767_uncultured Verrucomicrobia bacterium	Oligotroph	0	0	0	0	0	0	0.000192637	0	0	0	0	0	0	0.000149925	0	0	0	7.74195e-05	0	0	0.000183369	0	0	0	5.66966e-05	0	0.000498809	0
5a7cb00f284ca934aa324e74ad54243a	Bacteria	#N/A	#N/A	#N/A	#N/A	#N/A	#N/A	B9925_o_NA	Oligotroph	0	0	0	5.66309e-06	0	0	0	1.06477e-05	7.0132e-06	0	0	5.03114e-06	0	0	0	7.67318e-06	0	0	0	6.29229e-06	0	1.14394e-05	0	1.79455e-05	1.30838e-05	0	3.07636e-05	8.51899e-06
5aafd43a890e53f7eb7336ca2f2ef7b7	Bacteria	Chloroflexi	Anaerolineae	Ardenticatenales	uncultured	uncultured prokaryote	uncultured prokaryote	B6614_uncultured prokaryote	Oligotroph	0	0	0	0	8.35711e-05	8.58524e-05	0	0	0	0	0	0	0	0	0	0	9.93145e-05	0	0	0	0	0	0	0	0	0	0	0
5aba8314587d9767225c2a849a6d25cb	Bacteria	Cyanobacteria	Oxyphotobacteria	Oxyphotobacteria Incertae Sedis	Unknown Family	Leptolyngbya ANT.L52.2	#N/A	B7878_Leptolyngbya ANT.L52.2	Oligotroph	0	0	0	0	0.000100285	0	0	0	0	0	0	0	0	0	0	0	0	0	0	0	0	0	0	0	7.63224e-05	3.22363e-05	0	0
5ae3d4d880c79244ef925b1730c0eaca	Bacteria	Bacteroidetes	Bacteroidia	Bacteroidales	#N/A	#N/A	#N/A	B8714_o_Bacteroidales	Oligotroph	0	0	0	0	0	0	0	0	0	0	0	0	0	0	0	0	3.31048e-05	0	0	0	0	0	0	0	4.79741e-05	6.95625e-05	0	0
5b1c5395d62673bbe72c1d680572ba76	Bacteria	Spirochaetes	Leptospirae	Leptospirales	Leptospiraceae	uncultured	uncultured bacterium	B4834_uncultured	Oligotroph	0	0	0	1.8877e-05	0	0	0.000109453	0	2.57151e-05	0	0	0	0	0	0	0	6.00025e-05	0.000120683	0	1.25846e-05	6.87635e-05	0	0	0	0	0	5.71323e-05	1.27785e-05
5b5ec0dcda7bc95aecf451fdf22bf594	Bacteria	Kiritimatiellaeota	Kiritimatiellae	WCHB1-41	uncultured Verrucomicrobia bacterium	uncultured Verrucomicrobia bacterium	uncultured Verrucomicrobia bacterium	B20231_uncultured Verrucomicrobia bacterium	Oligotroph	0	0	0	0	0	0	0	0	0	0	0	0	0	0	0	0	0	0	0	0	0	0	0	0	0	0	1.0987e-05	0
5bc7deb11fe47e51c3e55900b4f788d7	Bacteria	Chloroflexi	Anaerolineae	SBR1031	uncultured bacterium	uncultured bacterium	uncultured bacterium	B607_uncultured bacterium	Oligotroph	0.000207756	0.000126139	0.000420513	0.000117037	0.000250713	0.000126039	0.000468459	0.000336467	0.000135588	3.70769e-05	0.000137813	0.000142549	0.000257003	0.000219403	0.000518554	0.000366395	0.000151041	0.000177609	0.000439709	0.00111793	0.00033363	0.000478168	0.000228832	0.000298548	0.000697805	0.000515781	0.000542757	3.4076e-05
5d800ff0f4dd812d71b4830cec87ac85	Bacteria	Proteobacteria	Deltaproteobacteria	Myxococcales	bacteriap25	#N/A	#N/A	B4700_f_bacteriap25	Oligotroph	0	0	0	0	0	0	0	0	0	0	0	0	0	0	0	0	0	1.36623e-05	4.39709e-05	0	0	4.34698e-05	0	0	0.000191896	0.000162878	0	0
5e1ddf201010cdc28b75b81c89757fdd	Bacteria	Cyanobacteria	Sericytochromatia	uncultured soil bacterium	uncultured soil bacterium	uncultured soil bacterium	uncultured soil bacterium	B16284_uncultured soil bacterium	Oligotroph	0	0	0	0	0	2.55731e-05	0	0	0	0	0	0	0	0	0	0	4.13811e-06	0	0	0	0	0	0	0	0	0	0	0
5fd27ba181ff3ece86ee384e620efc9d	Bacteria	Spirochaetes	Spirochaetia	Spirochaetales	Spirochaetaceae	Spirochaeta 2	Spirochaeta sp.	B3134_Spirochaeta 2	Oligotroph	0.00021009	0	0	6.41817e-05	0.000188632	0	0	0	0	0	5.46499e-05	0	0	0	0	0	0.000105522	0	0	0	0.000203744	0	0	0	0.000143922	1.35732e-05	0	0
614c28cb1fe2e0370cfac68f8544ff5a	Bacteria	Proteobacteria	Deltaproteobacteria	Myxococcales	bacteriap25	Deltaproteobacteria bacterium GWA2_45_12	Deltaproteobacteria bacterium GWA2_45_12	B14444_Deltaproteobacteria bacterium GWA2_45_12	Oligotroph	0	0	0	0	1.43265e-05	3.28797e-05	0	0	0	0	0	0	0	0	0	0	0	0	0	0	0	0	0	0	0	0	0	0
6309baefe4ab8e29457a05de20be9cbb	Bacteria	Dependentiae	Babeliae	Babeliales	uncultured bacterium	uncultured bacterium	uncultured bacterium	B19317_uncultured bacterium	Oligotroph	0	0	0	0	0	0	0	0	0	0	0	0	0	0	0	0	0	0	0	0	0	0	0	0	0	0	1.53818e-05	0
63f9fb593243704425ebdd450e1bf4ba	Bacteria	Chloroflexi	Anaerolineae	SBR1031	#N/A	#N/A	#N/A	B6439_o_SBR1031	Oligotroph	0	0	0	0	6.20814e-05	0	5.03484e-05	0.000129902	0	0	0	0	0	0	0	0	0	0	0	0	0	0	0	0	0	0	5.93297e-05	0
641693326585f8ea86b96ecb363a736b	Bacteria	Proteobacteria	Deltaproteobacteria	Myxococcales	Blfdi19	#N/A	#N/A	B4327_f_Blfdi19	Oligotroph	0	0	0	0	0	4.01862e-05	4.15921e-05	0	0	0	9.26672e-05	0	0	0	0	0	0.00013035	2.96016e-05	0	0	0	0	0	0	9.81288e-05	0.000100102	0	0
6437e600b53459c6c07d5050a4d5a5ca	Bacteria	Chloroflexi	Anaerolineae	Anaerolineales	Anaerolineaceae	uncultured	uncultured Anaerolineaceae bacterium	B1342_uncultured	Oligotroph	8.40362e-05	0	0	0	0.000193407	0	5.03484e-05	0	0	0	0.000128308	0	0	0	0	0	0.000266908	0	0	0	0	0.000130409	0.000492534	0.000500843	0.000486283	0.000115372	0	0.000500491
659c13674227709e0be27189e58b2ef3	Bacteria	Planctomycetes	Pla3 lineage	metagenome	metagenome	metagenome	metagenome	B3323_metagenome	Oligotroph	0	0	0	0	9.55098e-06	0	0	0	3.97414e-05	0	4.98977e-05	0	0	0	5.91828e-05	4.02842e-05	4.13811e-05	1.59393e-05	2.31426e-05	0	3.05616e-05	3.20304e-05	0	0.000247975	7.8503e-05	8.6529e-05	0	1.27785e-05
65d2814e21b2681fd0a38936758f1f2b	Bacteria	Chloroflexi	Anaerolineae	SBR1031	uncultured bacterium	uncultured bacterium	uncultured bacterium	B6564_uncultured bacterium	Oligotroph	0	0	0	0	1.19387e-05	0	0	0	0	0	4.75216e-06	0	0	0	0	0	8.89693e-05	0	0	0	0	0	8.71741e-06	0	8.28643e-05	6.78659e-05	0	0
665a63f453040ebd71673f7afc59ada4	Bacteria	Chloroflexi	Anaerolineae	Anaerolineales	Anaerolineaceae	Anaerolinea	metagenome	B1350_Anaerolinea	Oligotroph	0.000137726	0.00013002	0	0	0	0.000509635	9.19405e-05	0	0	0.000271335	0	0	0	0	0	0	4.13811e-05	0.000289184	0.00037491	0	0.000112059	0.000171591	8.0636e-05	0.000197401	3.0529e-05	0.000130642	0.00031203	0
666dab84c644590dca1c4b81dd77ffda	Bacteria	Nitrospirae	Thermodesulfovibrionia	uncultured	uncultured bacterium	uncultured bacterium	uncultured bacterium	B835_uncultured bacterium	Oligotroph	0.000555572	0	0.000760449	0	0	0	0.0013397	0.00102431	0	0	0	0	0	0	0	0.00018032	0	0	0	0	0	0.000183031	0	7.34135e-05	9.59482e-05	0.000156091	0.00161509	5.75032e-05
6845b2e2d0c09a242a713597e554a28f	Bacteria	Proteobacteria	Gammaproteobacteria	Coxiellales	Coxiellaceae	Coxiella	#N/A	B7011_Coxiella	Oligotroph	2.56777e-05	0	0	0	2.38775e-05	0	4.37812e-05	0	0	0	0	2.18016e-05	0	0	0	0	0	0	9.25703e-06	2.51692e-05	0	0	0	0	2.61677e-05	0	7.69089e-05	0
68aaed1d28cae9ea9d4cb10ce51d1981	Bacteria	Chlamydiae	Chlamydiae	Chlamydiales	Parachlamydiaceae	Neochlamydia	uncultured bacterium	B7677_Neochlamydia	Oligotroph	7.00301e-06	0	2.01443e-05	0	2.38775e-05	0	4.59703e-05	2.7684e-05	1.16887e-05	0	0	0	0	0	0	0	1.86215e-05	0	0	0	0	0	0	0	1.30838e-05	1.52698e-05	3.51583e-05	0
68e14cc9bc39b3c5779787edb0fadff9	Bacteria	Firmicutes	Bacilli	Bacillales	#N/A	#N/A	#N/A	B921_o_Bacillales	Oligotroph	0	0	0	0	0.00110791	0.00118001	0	1.91659e-05	1.63641e-05	0	0.000123556	2.68328e-05	0	0	0	0	6.20716e-05	9.10817e-05	4.39709e-05	3.35589e-05	4.58424e-05	5.26213e-05	6.53806e-05	6.19937e-05	0.00095512	0.000685445	0.00032082	0
6a1ce157774e061800e306a4c21f62a1	Bacteria	Proteobacteria	Deltaproteobacteria	Myxococcales	mle1-27	Myxococcales bacterium Gsoil 473	Myxococcales bacterium Gsoil 473	B2445_Myxococcales bacterium Gsoil 473	Oligotroph	0	0	0	0	0	0	5.47265e-05	0	0	0	0	0	6.31235e-05	0	0	0	4.96573e-05	0	0	0	0.000331084	8.0076e-05	3.7049e-05	0	2.3987e-05	3.56296e-05	0.000740523	0
6b7760c87545a567f8342b957f61d385	Bacteria	Patescibacteria	Parcubacteria	Candidatus Giovannonibacteria	Candidatus Giovannonibacteria bacterium GW2011_GWF2_42_19	Candidatus Giovannonibacteria bacterium GW2011_GWF2_42_19	Candidatus Giovannonibacteria bacterium GW2011_GWF2_42_19	B16293_Candidatus Giovannonibacteria bacterium GW2011_GWF2_42_19	Oligotroph	0	0	0	0	0	0	0	0	0	0	0	0	0	0	0	0	3.31048e-05	0	0	0	0	0	0	0	0	0	0	0
6c42924aee06e018ad24cfd32e7f2ea1	Bacteria	Firmicutes	#N/A	#N/A	#N/A	#N/A	#N/A	B4125_o_NA	Oligotroph	0	0	0	0	9.55098e-06	0	8.53734e-05	2.7684e-05	0	0	1.66326e-05	0	0	0	0	0	0.000372429	0	9.25703e-06	0	0	0	0	0	7.63224e-05	0	0	0
6d62f604546d77bb3727e8265220e6a7	Bacteria	Actinobacteria	MB-A2-108	#N/A	#N/A	#N/A	#N/A	B2060_o_NA	Oligotroph	0	0.0002581	0	0	0.000200571	0.000692299	0	0	0	0	7.84107e-05	0	0	0	0	0	4.34501e-05	0	0	0	0	0	0	0.00015009	0.000124296	0	0	0
6d8de5d25679c725bcfb2b802237efdc	Bacteria	Armatimonadetes	DG-56	uncultured bacterium	uncultured bacterium	uncultured bacterium	uncultured bacterium	B6708_uncultured bacterium	Oligotroph	0	0	0	0	0	0	0	0	0	0	0	0	0	0	0	0	3.9312e-05	0	0	0	0	0	0	0	2.18064e-05	0.000166271	0	0
6dafa3240a5e54fafb195ed16462d4d9	Bacteria	Armatimonadetes	#N/A	#N/A	#N/A	#N/A	#N/A	B6878_o_NA	Oligotroph	3.73494e-05	0	0	0	4.05917e-05	0	0	0	0	2.6965e-05	0	0	0	0	0	0	0	1.59393e-05	0	0	0	3.43183e-05	0	0	3.0529e-05	0	7.91063e-05	0
6efbf45690dde7d07211353d9b6da35d	Bacteria	Planctomycetes	OM190	planctomycete A-2	planctomycete A-2	planctomycete A-2	planctomycete A-2	B16297_planctomycete A-2	Oligotroph	0	0	0	0	3.82039e-05	0	0	0	0	0	0	0	0	0	0	0	0	0	0	0	0	0	0	0	0	0	0	0
6fb12a0b9be601a063c558d4a0d8edaf	Bacteria	Acidobacteria	Acidobacteriia	Subgroup 13	uncultured bacterium	uncultured bacterium	uncultured bacterium	B1351_uncultured bacterium	Oligotroph	9.57079e-05	0	0	0	0.000145653	0	0.0002802	0.000317301	0	0	0	0.000211308	0.000123993	0.000109701	0	0.000128526	0	8.65276e-05	0	0	0	0.000196758	0	3.09968e-05	0.000124296	0.000290127	0.000808642	0
6fb57577109e54ac46d865cdcde953b0	Bacteria	Verrucomicrobia	Verrucomicrobiae	Pedosphaerales	Pedosphaeraceae	ADurb.Bin063-1	uncultured Verrucomicrobia bacterium	B1950_ADurb.Bin063-1	Oligotroph	0	0	0	0	0	0	0	0	0	0	0	0	0	0	0	0	0	0	0	0	0	0	0	0	0.000525534	0.00103665	0	0
70a6f67e06d5c5ce80995086759df75f	Bacteria	Proteobacteria	Gammaproteobacteria	Competibacterales	Competibacteraceae	Candidatus Competibacter	anaerobic digester metagenome	B4210_Candidatus Competibacter	Oligotroph	0	0	0	0	0.000226836	0.000244771	0	0	0	0	0	0	0	0	0	0	0	0	0	0	0	0	0	0	0	7.46524e-05	0	0
70f3fac8a4df9701c7aa9c7df8c1b006	Bacteria	Chloroflexi	Chloroflexia	Chloroflexales	Chloroflexaceae	Oscillochloris	#N/A	B3183_Oscillochloris	Oligotroph	0	0	0	0	0.000432182	0	6.56718e-05	0	0	0	0	0	0	1.64552e-05	5.35463e-05	0	2.06905e-05	0	0	0	0	0	2.61522e-05	0	0.000320554	0	6.59219e-06	2.12975e-05
730e67d066277b67f86805d8c31bb18c	Bacteria	Proteobacteria	#N/A	#N/A	#N/A	#N/A	#N/A	B1863_o_NA	Oligotroph	0	0.000122258	3.52526e-05	0	0	6.2106e-05	0.000527564	0.000114995	7.0132e-06	0	0	0	0	0	0	0	0	4.55409e-05	0	8.38972e-06	9.42315e-05	3.8894e-05	0	0.000107673	1.52645e-05	0.000122159	0.000555941	4.04652e-05
73e5534a58997fe7f4420e3bd5e76d2e	Bacteria	Chlamydiae	Chlamydiae	Chlamydiales	Parachlamydiaceae	Neochlamydia	uncultured bacterium	B11063_Neochlamydia	Oligotroph	0	0	0	0	0	0	0	0	0	0	0	0	0	0	0	0	0	0	0	0	0	0	0	0	0	0	0.000105475	0
74652d4578722c3bc105efd6425b68af	Bacteria	#N/A	#N/A	#N/A	#N/A	#N/A	#N/A	B13907_o_NA	Oligotroph	0	0	7.55413e-06	0	0	0	0	0	0	0	0	0	0	0	0	0	0	0	0	0	0	0	0	0	0	0	5.27375e-05	0
756deb88845f9b4b016291de9d29196f	Bacteria	Zixibacteria	bacterium enrichment culture clone Anammox_55	bacterium enrichment culture clone Anammox_55	bacterium enrichment culture clone Anammox_55	bacterium enrichment culture clone Anammox_55	bacterium enrichment culture clone Anammox_55	B8043_bacterium enrichment culture clone Anammox_55	Oligotroph	0	0	0	0	0	3.65329e-06	0	0	0	0	0	0	0	0	0	0	0.000186215	0	0	0	0	0	0	0	0	0	0	0
75ca806035f91a1f7f4264a771138c41	Bacteria	Proteobacteria	Alphaproteobacteria	#N/A	#N/A	#N/A	#N/A	B14452_o_NA	Oligotroph	0	0	0	0	0	1.82665e-05	0	0	0	0	0	0	0	0	0	0	0	0	0	0	0	0	0	0	0	0	3.07636e-05	0
75e86d2bd52b50e1ae8242a939105d46	Bacteria	Proteobacteria	Deltaproteobacteria	Deltaproteobacteria Incertae Sedis	Unknown Family	Deferrisoma	#N/A	B1838_Deferrisoma	Oligotroph	0	0	0	0	0	2.37464e-05	0	0	0	0	0	0	0	0	0	0	0.000208974	0	2.77711e-05	0	0	0	0.000414077	0.000257763	0.000298748	0.000151002	0.000294451	0.000176769
777aa23841181046ee1b2a2caf4db360	Bacteria	Planctomycetes	Phycisphaerae	MSBL9	GWC2-45-44	uncultured soil bacterium	uncultured soil bacterium	B1726_uncultured soil bacterium	Oligotroph	9.33735e-05	0	0.000186335	6.79571e-05	6.68569e-05	2.19198e-05	0.000109453	5.32385e-05	3.74037e-05	5.22447e-05	3.80173e-05	0	5.86147e-05	0	0.000112729	4.60391e-05	3.72429e-05	3.41556e-05	1.61998e-05	1.4682e-05	5.60295e-05	1.14394e-05	0.000150375	0.000141933	7.63224e-05	6.61692e-05	0.000595494	0
77a159d3ff95cf68209b917913878f32	Bacteria	TA06	uncultured soil bacterium	uncultured soil bacterium	uncultured soil bacterium	uncultured soil bacterium	uncultured soil bacterium	B2509_uncultured soil bacterium	Oligotroph	7.46988e-05	0	0	0	4.29794e-05	0	5.03484e-05	0	0	0	0	0	0	0	0	0.000172647	0	0	0	0.000130041	0	0	0	0	6.75998e-05	0	0.000764694	0
783eed356bb1f1bb9e42404000022054	Bacteria	Proteobacteria	Gammaproteobacteria	#N/A	#N/A	#N/A	#N/A	B4559_o_NA	Oligotroph	0	4.46338e-05	0	0	0	0.000257557	0	0	0	0	0	0	0	0	0	0	0	0	0	0	0	0	0	2.7734e-05	0.000128658	0	0	0
78d9e6589f538cdd379f972d21ee23fd	Bacteria	Planctomycetes	Phycisphaerae	MSBL9	#N/A	#N/A	#N/A	B17859_o_MSBL9	Oligotroph	0	0	5.03608e-06	0	0	9.13324e-06	0	0	0	0	0	0	0	0	0	0	0	0	0	0	0	0	0	0	0	0	8.78959e-06	0
79b8df7a214f8989a7c2164a8ddbe11d	Bacteria	#N/A	#N/A	#N/A	#N/A	#N/A	#N/A	B5757_o_NA	Oligotroph	0	0	0	0	0.000136102	0.000120559	0	0	0	0	0	0	0	0	0	0	0	9.33588e-05	0	0	0	0	0	0	0	0	0	0
7a1f28c960bc53ff0513d2b1c978cbe4	Bacteria	Chloroflexi	Anaerolineae	SBR1031	uncultured sludge bacterium H5	uncultured sludge bacterium H5	uncultured sludge bacterium H5	B5897_uncultured sludge bacterium H5	Oligotroph	0	0	0	0	0	0	0	0	0	0	0	0	0	0	0	0	0.000254493	0	0	0	0	0	0	0	0	5.93826e-05	0	0
7aa2a425af4220a50e35d14320eb9666	Bacteria	Patescibacteria	Saccharimonadia	Saccharimonadales	uncultured bacterium	uncultured bacterium	uncultured bacterium	B11263_uncultured bacterium	Oligotroph	0	0	0	0	0	0	0	0	0	0	0	0	0	0	0	0	0	0	0	0	0	0	0	0	0	7.80457e-05	0	0
7c439c02813b7f8fb0f6ad6a8b27e7aa	Bacteria	Nitrospirae	Thermodesulfovibrionia	uncultured	uncultured bacterium	uncultured bacterium	uncultured bacterium	B18973_uncultured bacterium	Oligotroph	0	0	0	0	9.55098e-06	7.30659e-06	0	0	0	0	0	0	0	0	0	0	0	0	0	0	0	0	0	0	0	0	0	0
7d438b396f328984cd5904adee6c589d	Bacteria	Bacteroidetes	Ignavibacteria	SJA-28	uncultured bacterium	uncultured bacterium	uncultured bacterium	B2035_uncultured bacterium	Oligotroph	0.000266115	6.01587e-05	0.000314755	0.000181219	0	0	0.000297712	0	0	0	0	0	0	0	0	0	0	0.000275522	0	0	0	0	0	0	0.00017009	0	0.000237319	0
7d6d5d28f854ecf714f6d9d1b965b617	Bacteria	Chloroflexi	Anaerolineae	SBR1031	uncultured Gemmatimonadetes bacterium	uncultured Gemmatimonadetes bacterium	uncultured Gemmatimonadetes bacterium	B1580_uncultured Gemmatimonadetes bacterium	Oligotroph	0	0	9.56856e-05	5.66309e-05	0.000176693	0	5.91046e-05	0	0	0	4.03934e-05	0	0	0	7.89104e-05	0	0.000275184	2.27704e-05	7.63705e-05	0.000201353	5.09359e-05	7.32123e-05	0.000377028	0.000256132	0.00030529	8.82256e-05	0.000195568	0
7dc764476fb172e1a3d474d04482fa64	Bacteria	Latescibacteria	uncultured bacterium	uncultured bacterium	uncultured bacterium	uncultured bacterium	uncultured bacterium	B3145_uncultured bacterium	Oligotroph	0	0	0	0	8.83466e-05	0.000102292	0	0	0	0	0	5.03114e-05	2.93073e-05	5.30224e-05	5.63645e-05	0	8.69002e-05	6.60343e-05	3.00853e-05	0	0	2.97425e-05	5.23044e-05	5.38366e-05	0.000113393	4.92027e-05	1.97766e-05	0
7df62923068baf996afd873b7422a52c	Bacteria	Chloroflexi	TK10	bacterium Ellin6519	bacterium Ellin6519	bacterium Ellin6519	bacterium Ellin6519	B9543_bacterium Ellin6519	Oligotroph	0	0	0	0	0	0	0	0	0	0	0	0	0	0	0	0	0	0	0	0	0	0	0	0	1.96258e-05	1.35732e-05	0.000107672	0
7e7edff504057fd18b4c0212dbb1240d	Bacteria	Proteobacteria	#N/A	#N/A	#N/A	#N/A	#N/A	B16610_o_NA	Oligotroph	0	0	0	0	0	0	0	0	0	0	0	0	0	0	0	0	0	0	0	0	0	0	0	0	0	0	3.29609e-05	0
7efd6c6166236666edb4ec8b7a5b6656	Bacteria	Acidobacteria	Acidobacteriia	Solibacterales	Solibacteraceae (Subgroup 3)	Paludibaculum	#N/A	B1451_Paludibaculum	Oligotroph	0.000100377	0	6.0433e-05	0	0.000229224	0.000405516	0.000529753	0.000496183	6.0781e-05	6.06712e-05	0.000128308	1.00623e-05	0	0	0	0	0	0.000150285	5.55422e-05	0	0	0	0	0	0.000211522	0	0.000252701	0
7f1047ebb8fd37ac38d28de086d5bcd1	Bacteria	#N/A	#N/A	#N/A	#N/A	#N/A	#N/A	B17175_o_NA	Oligotroph	0	0	0	0	0	0	0	0	0	0	0	0	0	0	0	0	0	0	0	0	0	0	0	0	0	0	2.85662e-05	0
80957ff7d243e147cdb2f8f18a598bce	Bacteria	Bacteroidetes	Ignavibacteria	Kryptoniales	BSV26	uncultured bacterium	uncultured bacterium	B1971_uncultured bacterium	Oligotroph	0	2.13466e-05	0.000130938	1.69893e-05	0.000162367	0	0	0.000193788	6.0781e-05	0.000144937	0	4.86344e-05	4.28338e-05	0	2.81823e-05	0	0	0	8.33133e-05	8.80921e-05	0.000119699	0.000141849	2.61522e-05	1.30513e-05	7.19611e-05	4.07195e-05	0.000386742	0
812655d62904ba6024a0c2d8908cb319	Bacteria	Proteobacteria	Deltaproteobacteria	Myxococcales	P3OB-42	uncultured bacterium	uncultured bacterium	B4687_uncultured bacterium	Oligotroph	2.1009e-05	3.68714e-05	0	0	0	6.57593e-05	0.000126966	0	2.80528e-05	0	0	0	0	0	0	0	0	0	0	0	0	0	0	5.70994e-05	0	7.46524e-05	3.51583e-05	0
818b553c207785a8c52c4cd619fe912f	Bacteria	Proteobacteria	Deltaproteobacteria	Myxococcales	Archangiaceae	Anaeromyxobacter	#N/A	B1403_Anaeromyxobacter	Oligotroph	0	0	0	0	0.000568284	0	0	0.000866723	0	0	0	0	0	0	0	0	0.000134488	0	0	0.000333491	0	0	0.000150375	0	0.000209341	0	0.000687785	0
81b7ea62a2aa7c3619a4ea47ce1e5752	Bacteria	Planctomycetes	BD7-11	uncultured bacterium	uncultured bacterium	uncultured bacterium	uncultured bacterium	B5512_uncultured bacterium	Oligotroph	0	0	7.55413e-05	5.28555e-05	2.62652e-05	0	3.94031e-05	0	0	0	0	0	4.50882e-05	0	0	0	0	0	0	0	0	0	0	1.14199e-05	0	0	0.000138436	0
81bc148708e7ce8749a40bc2069bbf9c	Bacteria	Acidobacteria	Subgroup 25	uncultured soil bacterium	uncultured soil bacterium	uncultured soil bacterium	uncultured soil bacterium	B8326_uncultured soil bacterium	Oligotroph	0	0	0	0	7.87956e-05	9.68123e-05	0	0	0	0	0	0	0	0	0	0	0	0	0	0	0	0	0	0	0	0	0	0
836ccd06f398d8f998f42d22c5c2af64	Bacteria	Spirochaetes	Leptospirae	Leptospirales	Leptospiraceae	#N/A	#N/A	B5572_f_Leptospiraceae	Oligotroph	0	0	0	0	0	0	0.000188259	1.49068e-05	0	0	0	0	3.60706e-05	0	3.38187e-05	0	2.27596e-05	0	0	0	0	0	0	0	4.36128e-05	0	4.83427e-05	0
846e816922cb2dc79fbbd18371ebb496	Bacteria	Chloroflexi	Anaerolineae	#N/A	#N/A	#N/A	#N/A	B1723_o_NA	Oligotroph	0	0	0	0	0.00106016	0.000516941	5.25374e-05	0	0	0	0	0	0	0	0	0	0.000151041	0	0	0	0.000435502	0	0	0	0	0	0	0
8489d004575b5c52d06e94cee8ad84bc	Bacteria	Acidobacteria	Subgroup 11	#N/A	#N/A	#N/A	#N/A	B14278_o_NA	Oligotroph	0	0	0	0	0	0	0	0	0	0	0	0	0	0	0	0	1.24143e-05	0	0	0	0	0	0	0	0	3.22363e-05	0	0
851889fa942cad74fbb953b929b647f4	Bacteria	FCPU426	#N/A	#N/A	#N/A	#N/A	#N/A	B12359_o_NA	Oligotroph	0	0	2.26624e-05	0	0	0	1.75125e-05	6.38862e-06	0	0	0	0	0	0	0	0	1.24143e-05	1.59393e-05	0	0	0	0	0	0	8.72256e-06	0	0	0
8635c1ad3dbefb844207e72f11b334bc	Bacteria	Planctomycetes	Planctomycetacia	Gemmatales	Gemmataceae	#N/A	#N/A	B10702_f_Gemmataceae	Oligotroph	0	0	0	0	0.000124163	0	0	0	0	0	0	0	0	0	0	0	0	0	0	0	0	0	0	0	0	0	0	0
8744637370be7e3ba33c649d66710149	Bacteria	#N/A	#N/A	#N/A	#N/A	#N/A	#N/A	B4659_o_NA	Oligotroph	0	0	0	0	4.53672e-05	0	1.75125e-05	0	0	0	0	0	0	0	0	1.72647e-05	0.00019656	8.42506e-05	0	0	0	0	0	0	0	0	2.1974e-05	0.000112877
87e2c29e8601845497526d3ccf47e7ab	Bacteria	Proteobacteria	Deltaproteobacteria	Myxococcales	Archangiaceae	Anaeromyxobacter	#N/A	B2763_Anaeromyxobacter	Oligotroph	0	0	0	0	0	0	0	0.000419519	0	0	0	0	0	0	0	0	0	0	0	0	0.000145167	0	0	0	0	0	0.000606481	0
8851c064b8a6ad063b9daa84391daf5e	Bacteria	Chloroflexi	Anaerolineae	SBR1031	anaerobic bacterium MO-CFX2	anaerobic bacterium MO-CFX2	anaerobic bacterium MO-CFX2	B2134_anaerobic bacterium MO-CFX2	Oligotroph	0	0	0	0	0.000188632	0.000168052	0	0	0.000156628	3.03356e-05	0.000114052	0.000110685	0	0	0	0	4.75882e-05	0	0	0	0	0	0	0	0.000318373	0.000383442	0	0
88a844fb1e4ecd60e2593ccfab5ee589	Bacteria	#N/A	#N/A	#N/A	#N/A	#N/A	#N/A	B9403_o_NA	Oligotroph	0	0	2.01443e-05	0	0	9.13324e-05	0	0	0	0	0	0	0	0	0	0	0	0	0	0	0	0	0	0	0	0	2.1974e-05	0
88ceef3e0b4142205141bfa3924f5b0e	Bacteria	Nitrospirae	4-29-1	uncultured proteobacterium	uncultured proteobacterium	uncultured proteobacterium	uncultured proteobacterium	B4753_uncultured proteobacterium	Oligotroph	0	0	0	0	0.000534855	0	0	0	0	0	0	0	0	0	0	0	0	0	0	0	0	0	0	0	0	0	0	0
890390ed9d2baa5d4ded9f2c093ac3c2	Bacteria	Planctomycetes	OM190	#N/A	#N/A	#N/A	#N/A	B5617_o_NA	Oligotroph	0	0	0	0	5.73059e-05	0.000122385	0	0	2.80528e-05	0	0	3.18639e-05	0	0	0	0	7.65549e-05	0	0	0	0	0	0	0	2.83483e-05	0	0	0
89638faf13b912c5c8ad4d81d799a575	Bacteria	Proteobacteria	Deltaproteobacteria	Myxococcales	Blfdi19	uncultured Nannocystineae bacterium	uncultured Nannocystineae bacterium	B17528_uncultured Nannocystineae bacterium	Oligotroph	0	0	0	0	0	1.64398e-05	0	0	0	0	0	0	0	0	0	0	6.20716e-06	0	0	0	0	0	0	0	0	0	0	0
8be64e67181023e55f691be86c9fcfc6	Bacteria	Bacteroidetes	Bacteroidia	Chitinophagales	Saprospiraceae	uncultured	#N/A	B12361_uncultured	Oligotroph	0	0	0	0	8.83466e-05	0	0	0	0	0	0	0	0	0	0	0	0	0	0	0	0	0	0	0	0	0	0	0
8d174109455027962947d85bbb6d9159	Bacteria	Chloroflexi	Anaerolineae	RBG-13-54-9	uncultured Caldilineaceae bacterium	uncultured Caldilineaceae bacterium	uncultured Caldilineaceae bacterium	B778_uncultured Caldilineaceae bacterium	Oligotroph	0	0	0	0	0.000565896	0.00096995	0	0	0.000112211	0.000106175	0.000173454	0.000716099	0	0	0	0	0.000788309	0.000286907	0	0.00022023	0.000137527	0.00011897	0.000346517	0.00105063	0	0.000156091	0	8.30602e-05
8db658638e56fd9f831912ce892129d5	Bacteria	Chloroflexi	#N/A	#N/A	#N/A	#N/A	#N/A	B10964_o_NA	Oligotroph	0	0	0	0	0	0	0	5.32385e-05	0	0	0	0	0	0	0	0	0	0	0	0	0	0	0	9.78847e-06	8.72256e-06	2.3753e-05	0	0
8e064fe3fd84bb6602c24d23446c39ef	Bacteria	Proteobacteria	Alphaproteobacteria	Acetobacterales	Acetobacteraceae	#N/A	#N/A	B4607_f_Acetobacteraceae	Oligotroph	0	0	0	0	0	0	0	0	0	0	0	0	0	0	0	0	0	0	0	0	0	0	0	0	0	0	0.000518586	0
8e9d872f31ca7de7f210f504055dba18	Bacteria	Nitrospirae	Nitrospira	Nitrospirales	Nitrospiraceae	Nitrospira	#N/A	B15095_Nitrospira	Oligotroph	0	0	0	0	0	0	8.75624e-06	1.49068e-05	0	0	0	0	0	0	0	0	0	0	0	0	0	0	0	0	8.72256e-06	0	1.31844e-05	0
8ef34b2c3e9b1f013cd76d365ee9740a	Bacteria	Elusimicrobia	Elusimicrobia	MVP-88	#N/A	#N/A	#N/A	B6762_o_MVP-88	Oligotroph	0	0	0	0	7.16324e-06	0	7.44281e-05	0.000181011	0	0	0	0	0	0	0	0	0	0	0	0	7.64039e-06	0	0	0	0	0	0	0
8f4b1ffb36e6a09073ea9bf050029884	Bacteria	Cyanobacteria	Oxyphotobacteria	Nostocales	Microcystaceae	Microcystis PCC-7914	#N/A	B7914_Microcystis PCC-7914	Oligotroph	0	0	1.51083e-05	3.02032e-05	3.34284e-05	2.73997e-05	0	2.7684e-05	0	0	0	0	1.12721e-05	0	0	0	2.48286e-05	0	0	0	0	0	4.3587e-06	0	2.61677e-05	0	0	0
8fa985a73ed052e871c21910624e4c9f	Bacteria	Nitrospirae	Nitrospira	Nitrospirales	Nitrospiraceae	Leptospirillum	hydrothermal vent metagenome	B15334_Leptospirillum	Oligotroph	0	0	0	0	0	0	0	0	0	0	0	0	0	0	0	0	0	0	0	0	0	0	0	2.28398e-05	0	1.01799e-05	0	0
90158ba5ba44d46aa2609b646cd8744c	Bacteria	Proteobacteria	Deltaproteobacteria	Myxococcales	KD3-10	metagenome	metagenome	B7050_metagenome	Oligotroph	0	0	0	0	7.16324e-05	0	0	0	0	0	0	0	0	0	0	0	0	0	0	0	0	0	0	4.89424e-05	0.000122116	0	0	0
90309c3daa98de1f07951eaad9c9b3ad	Bacteria	Chloroflexi	Chloroflexia	Chloroflexales	Roseiflexaceae	#N/A	#N/A	B13726_f_Roseiflexaceae	Oligotroph	0	0	0	0	0	0	0	0	0	0	0	0	0	0	0	0	1.24143e-05	0	0	0	0	0	0	0	0	0	4.83427e-05	0
906acb7252d1870811780439f10fe294	Bacteria	Chlamydiae	Chlamydiae	Chlamydiales	Parachlamydiaceae	Neochlamydia	endosymbiont of Naegleria clarki	B17186_Neochlamydia	Oligotroph	0	0	0	0	0	0	0	0	0	0	0	0	0	0	0	0	0	0	0	0	0	0	0	0	0	1.18765e-05	1.31844e-05	0
9096d22cf44c6fc9541473b38b48b6c5	Bacteria	Proteobacteria	Deltaproteobacteria	Sva0485	#N/A	#N/A	#N/A	B200_o_Sva0485	Oligotroph	0.00204021	0.0018067	0.00107269	0.00188015	0.00139683	0.00210978	0.00153234	0.00236379	0	0.000193811	0.00028513	0.000358888	0.000716902	0.00035653	0.000363551	0.000744299	0.000920728	0.00139127	0.000203655	0	0.00179804	0.00178913	0.000233191	0.000698244	0.000686902	0.000232441	0.00167661	0.00116284
90c34302fc51bb686fc1a7f74881b69f	Bacteria	Proteobacteria	Gammaproteobacteria	Coxiellales	Coxiellaceae	Coxiella	uncultured hydrocarbon seep bacterium BPC023	B16899_Coxiella	Oligotroph	0	0	0	0	0	0	0	0	0	0	0	0	0	0	0	0	0	0	0	0	0	0	0	0	0	0	3.07636e-05	0
910c476c62a578d58f0c4ab06e925606	Bacteria	Chloroflexi	SHA-26	#N/A	#N/A	#N/A	#N/A	B6566_o_NA	Oligotroph	0	0	0	0	0	0	0	0	0	0	0	0	0	0	0	0	8.48312e-05	0	0	0	0	0	0	0	0.000104671	0	9.44881e-05	0
910c9e990f23ebf3b0459803184921d0	Bacteria	Cyanobacteria	Oxyphotobacteria	Nostocales	Microcystaceae	Cyanothece PCC-7424	#N/A	B12120_Cyanothece PCC-7424	Oligotroph	0	0	0	0	0	4.74928e-05	0	0	0	0	0	0	0	0	0	0	0	0	0	0	0	0	0	0	0	2.20564e-05	0	0
9121976b42791abc5c14642c49a9058f	Bacteria	WOR-1	uncultured bacterium	uncultured bacterium	uncultured bacterium	uncultured bacterium	uncultured bacterium	B6618_uncultured bacterium	Oligotroph	0	0	0	2.26524e-05	0	0	0	0	0	0	0	0	8.56676e-05	0	0	0	0	0	0	0	0	4.80456e-05	0	0	0	0	0.000129646	0
914e9c98c89b2b5127fd9652a5798a1c	Bacteria	Planctomycetes	Planctomycetacia	Gemmatales	Gemmataceae	uncultured	uncultured bacterium	B877_uncultured	Oligotroph	0	0	0	0	0.000157591	0.000568087	0	0	0	0	0	9.72688e-05	0.000200643	0	7.04557e-05	0.00024746	5.79335e-05	0.000248198	0.000118027	0.000224425	0.000183369	0.000279122	0.0002005	0.000368699	0.00092023	0.000912796	0.000147226	8.51899e-05
92434223eacc9f747656f9256cf94f16	Bacteria	Chloroflexi	Chloroflexia	Chloroflexales	Chloroflexaceae	Chloronema	#N/A	B15097_Chloronema	Oligotroph	0	0	0	0	0	3.83596e-05	0	0	0	0	0	0	0	0	0	0	0	0	0	0	0	0	0	0	0	0	0	0
9273f0a9fcebdfd007006b2e5231a6af	Bacteria	Bacteroidetes	Ignavibacteria	Kryptoniales	BSV26	uncultured bacterium	uncultured bacterium	B1173_uncultured bacterium	Oligotroph	0.000268449	0.000861627	0.000392815	0.000352999	0.000109836	0.000489542	0.000278011	0.000259804	0	0	0	0	1.57809e-05	0	0	0	0	0.000325617	0	9.01895e-05	0	1.83031e-05	4.79457e-05	0	0	2.03598e-05	0.000105475	0
942737427d5cf56a101d7e768a834503	Bacteria	Cyanobacteria	Sericytochromatia	uncultured soil bacterium	uncultured soil bacterium	uncultured soil bacterium	uncultured soil bacterium	B9934_uncultured soil bacterium	Oligotroph	0	3.8812e-05	0	0	0	0	5.03484e-05	0	0	0	0	0	0	0	0	0	0	2.27704e-05	0	0	0	0	0	0	0	0	1.75792e-05	0
9556d69cc04aa6a2703ff87bfc3da795	Bacteria	Chloroflexi	AD3	#N/A	#N/A	#N/A	#N/A	B12238_o_NA	Oligotroph	0	0	0	0	0	0	2.18906e-05	0	0	0	0	0	0	0	0	0	0	0	0	0	0	0	0	0	0	0	6.15271e-05	0
95cff37df22b9c6fd4391ebbe2166ac6	Bacteria	Proteobacteria	Gammaproteobacteria	Diplorickettsiales	Diplorickettsiaceae	uncultured	#N/A	B11269_uncultured	Oligotroph	0	0	0	0	0	0	0	0	0	0	0	0	0	0	0	0	0	0	0	0	0	0	0	0	0	0	0.00010108	0
96774dd78be08453566083cca2183f5a	Bacteria	#N/A	#N/A	#N/A	#N/A	#N/A	#N/A	B19851_o_NA	Oligotroph	0	0	0	0	0	0	0	0	0	0	0	0	0	0	0	0	0	0	0	0	0	0	0	0	0	0	1.31844e-05	0
9690f4d305c8282194ca9e183acc3427	Bacteria	Patescibacteria	Parcubacteria	Candidatus Moranbacteria	uncultured Parcubacteria group bacterium	uncultured Parcubacteria group bacterium	uncultured Parcubacteria group bacterium	B12239_uncultured Parcubacteria group bacterium	Oligotroph	0	0	0	0	0	0	2.18906e-05	0	0	0	0	0	0	0	0	0	3.9312e-05	0	0	0	0	0	0	1.14199e-05	4.36128e-06	0	0	0
979bc8d7082cd25b8862c34de465b5ae	Bacteria	Proteobacteria	Deltaproteobacteria	#N/A	#N/A	#N/A	#N/A	B2144_o_NA	Oligotroph	0.000256777	0.000310496	0.000118348	0	0	0	0.000146667	7.66634e-05	0	0	0	0	0	0	0	0	9.51764e-05	0.000277799	0	0	3.31084e-05	0.00011897	0	0	1.09032e-05	0	0.000228529	0
983d1717209b17bb2e7142735f4bc873	Bacteria	Planctomycetes	Planctomycetacia	Pirellulales	Pirellulaceae	uncultured	uncultured bacterium	B5150_uncultured	Oligotroph	0	0	0	0	8.59589e-05	0.000107772	0	5.74976e-05	0	0	0	0	0	0	0	0	6.41406e-05	0	0	9.22869e-05	0	0	0	0	0	0	0	0
98c7e0a9a680e350814732b5afec1933	Bacteria	Patescibacteria	Parcubacteria	uncultured bacterium	uncultured bacterium	uncultured bacterium	uncultured bacterium	B17539_uncultured bacterium	Oligotroph	0	0	0	0	2.8653e-05	0	0	0	0	0	0	0	0	0	0	0	0	0	0	0	0	0	0	0	0	0	0	0
9948b774ac99d6deb9cecdcc501fe649	Bacteria	Verrucomicrobia	Verrucomicrobiae	Pedosphaerales	Pedosphaeraceae	#N/A	#N/A	B3023_f_Pedosphaeraceae	Oligotroph	0	0	0	0	9.55098e-06	4.93195e-05	0	0	0	0	0	0	0	0	0	0	0	1.82163e-05	0	0	0	4.34698e-05	4.3587e-06	0	0.000370709	0.000388532	0	0
996d3abe1a1323049ae0f6dc82d7932a	Bacteria	Planctomycetes	Phycisphaerae	Pla1 lineage	uncultured bacterium	uncultured bacterium	uncultured bacterium	B9858_uncultured bacterium	Oligotroph	0	0	0	0	5.01427e-05	0	0	0	0	0	0	0	0	0	0	0	0	0	0	0	0	0	0	0	0	0	9.00933e-05	0
998e695e5fd5479073e78127c625c7d1	Bacteria	Bacteroidetes	Bacteroidia	Sphingobacteriales	KD3-93	Bacteroidetes bacterium RIFCSPLOWO2_12_FULL_35_15	Bacteroidetes bacterium RIFCSPLOWO2_12_FULL_35_15	B8047_Bacteroidetes bacterium RIFCSPLOWO2_12_FULL_35_15	Oligotroph	2.56777e-05	0	0	0	0	0	0	0	0	0	0	0	0	0	0	0	0.000167593	0	0	0	0	0	0	0	0	0	0	0
99ef2e0777b07b1e6a486a7181d6ff4f	Bacteria	Proteobacteria	Deltaproteobacteria	Myxococcales	bacteriap25	uncultured soil bacterium	uncultured soil bacterium	B13374_uncultured soil bacterium	Oligotroph	0	0	0	0	0	0	8.75624e-06	0	0	0	0	0	0	0	0	0	0	0	0	0	0	0	0	0	0	0	5.71323e-05	0
9a45e6a03e50e230242b437ae05ab6cc	Bacteria	Chloroflexi	Anaerolineae	RBG-13-54-9	#N/A	#N/A	#N/A	B20939_o_RBG-13-54-9	Oligotroph	0	0	0	0	4.77549e-06	0	0	0	0	0	0	0	0	0	0	0	0	0	0	0	0	0	0	0	0	0	4.39479e-06	0
9af22c7d8e2bf128896bf86749a6ccaa	Bacteria	Nitrospirae	Thermodesulfovibrionia	uncultured	#N/A	#N/A	#N/A	B7824_o_uncultured	Oligotroph	0	0	0	0	3.10407e-05	0	6.34828e-05	0	3.03905e-05	0	0	0	0	0	0	0	0	0	0	0	1.52808e-05	0	0	4.89424e-06	5.01547e-05	0	2.1974e-05	0
9b9f50d65352b21c26ac94e6d1028f1c	Bacteria	Bacteroidetes	Ignavibacteria	SJA-28	uncultured bacterium	uncultured bacterium	uncultured bacterium	B1879_uncultured bacterium	Oligotroph	9.10392e-05	0	0	0	0.000324733	0	0	0.000274711	0	0	0	0	0	0	0	0	0.000175869	0	0	0	0.00012734	0.000359198	0	0	0.000165729	0.000105192	0.000250503	9.79684e-05
9c0c363b37e390fc450eb9235979b754	Bacteria	Proteobacteria	Gammaproteobacteria	Nitrosococcales	Nitrosococcaceae	wb1-P19	uncultured gamma proteobacterium	B13375_wb1-P19	Oligotroph	0	0	0	0	4.77549e-05	0	0	0	0	0	0	0	0	0	0	0	0	0	0	0	0	0	0	0	0	0	2.1974e-05	0
9c910caa4b58f9112c41c347ff5ece7d	Bacteria	Bacteroidetes	Ignavibacteria	Kryptoniales	BSV26	#N/A	#N/A	B3254_f_BSV26	Oligotroph	0	0	0	0	0	0	0.000251742	0	0	0	0	0	0	0	0	0	0	0	0	0	0	0	0	0	0	0.000179845	0.000402124	0
9d52dc3c52c8fd02a206f1cf83f55b2e	Bacteria	Chloroflexi	Chloroflexia	Chloroflexales	Roseiflexaceae	Kouleothrix	uncultured Chloroflexus sp.	B5797_Kouleothrix	Oligotroph	0	0	0	0	0.000245938	0	0	0	0	0	0	0	1.57809e-05	0	0	0	4.96573e-05	0	0	0	0	0	0	0	3.92515e-05	0	0	2.12975e-05
9e3e3c3a7c0bd205631e0ddd967293b4	Bacteria	Proteobacteria	Gammaproteobacteria	Betaproteobacteriales	#N/A	#N/A	#N/A	B6323_o_Betaproteobacteriales	Oligotroph	0	0	0	0	0	0	0	0	0	0	0	0	0	0	0	0	9.10383e-05	0	0	0	0	0	0	0	0	0	0.000213147	0
9e5b377afbe4d882b9290570c78cb9c7	Bacteria	Patescibacteria	Microgenomatia	Candidatus Woesebacteria	groundwater metagenome	groundwater metagenome	groundwater metagenome	B12520_groundwater metagenome	Oligotroph	0	0	0	0	0	6.57593e-05	0	0	0	0	0	0	0	0	0	0	0	0	0	0	0	0	0	0	0	0	0	0
9f5630f0b9e0003c27ac56cc0a9a768d	Bacteria	Chloroflexi	Chloroflexia	Chloroflexales	Chloroflexaceae	Chloroflexus	Chloroflexi bacterium Um-2	B13065_Chloroflexus	Oligotroph	0	0	0	0	0	0	0	0	0	0	0	0	0	0	0	0	6.62097e-05	0	0	0	0	0	0	0	0	0	0	0
a100070be9d5d72ecf2b12d757dcfb5b	Bacteria	#N/A	#N/A	#N/A	#N/A	#N/A	#N/A	B11983_o_NA	Oligotroph	0	3.8812e-06	0	0	5.25304e-05	2.92264e-05	0	0	0	0	0	0	0	0	0	0	0	0	0	0	0	0	0	0	0	0	0	0
a1124ee1a8116de6a3585495af6a7273	Bacteria	Proteobacteria	Gammaproteobacteria	Methylococcales	Methylococcaceae	Methylomagnum	#N/A	B6765_Methylomagnum	Oligotroph	2.80121e-05	0	3.02165e-05	0	0	0	5.03484e-05	0	0	0	0	0	0	0	0	0	8.0693e-05	0	0	0	0	0	0	1.14199e-05	0	2.71463e-05	3.51583e-05	0
a129ca09ea8d1331ce8fc93d62b8b716	Bacteria	Cyanobacteria	Oxyphotobacteria	Leptolyngbyales	Leptolyngbyaceae	#N/A	#N/A	B7237_f_Leptolyngbyaceae	Oligotroph	0	0	0	0	0.000109836	0	0	0.00013842	0	0	0	0	0	0	0	0	0	0	0	0	0	0	0	0	0	0	0	0
a27490a79bdcc191c40aa2fdffe3d99a	Bacteria	Chloroflexi	OLB14	Chloroflexi bacterium OLB14	Chloroflexi bacterium OLB14	Chloroflexi bacterium OLB14	Chloroflexi bacterium OLB14	B13378_Chloroflexi bacterium OLB14	Oligotroph	0	0	0	0	0	0	0	5.32385e-05	0	0	0	0	0	0	0	0	0	0	0	0	0	0	0	0	0	0	1.0987e-05	0
a2c76fb1140d8504a822ad44386f23a0	Bacteria	Proteobacteria	Gammaproteobacteria	Cellvibrionales	Porticoccaceae	Porticoccus	metagenome	B8565_Porticoccus	Oligotroph	0	0	0	0	0	0	3.06468e-05	0	0	0	0	0	0	0	0	0	0	0	0	0	0	3.8894e-05	0	0	0	0	0.000112067	0
a2d4c9ece7e94a143effae03c62e5e28	Bacteria	#N/A	#N/A	#N/A	#N/A	#N/A	#N/A	B19874_o_NA	Oligotroph	0	0	0	0	1.43265e-05	0	0	0	0	0	0	0	0	0	0	0	0	0	0	0	0	0	0	0	0	0	0	0
a3a537ca3c534a66088db0cd4442d534	Bacteria	Chloroflexi	Chloroflexia	Chloroflexales	Roseiflexaceae	uncultured	uncultured bacterium	B12367_uncultured	Oligotroph	0	0	0	1.13262e-05	0	1.64398e-05	0	0	0	0	0	0	0	0	0	0	0	6.83113e-06	0	0	0	0	0	0	1.52645e-05	1.52698e-05	6.59219e-06	0
a3d373d5e0d0a19eaa45258495c3f238	Bacteria	Proteobacteria	Deltaproteobacteria	Myxococcales	KD3-10	uncultured bacterium	uncultured bacterium	B9339_uncultured bacterium	Oligotroph	0	0	0	0	6.20814e-05	7.85458e-05	0	0	0	0	0	0	0	0	0	0	0	0	0	0	0	0	0	0	0	0	0	0
a3d94d9ec516fe35ce974fc42489f3c4	Bacteria	Chlamydiae	Chlamydiae	Chlamydiales	Parachlamydiaceae	#N/A	#N/A	B9286_f_Parachlamydiaceae	Oligotroph	0	0	0	0	0	0	0	0	0	0	0	0	0	0	0	0	0	0	0	0	0	0	0	0	0	0	0.000153818	0
a418c4236b50a53f8440b35914094871	Bacteria	WS1	uncultured bacterium	uncultured bacterium	uncultured bacterium	uncultured bacterium	uncultured bacterium	B19013_uncultured bacterium	Oligotroph	0	0	0	0	1.9102e-05	0	0	0	0	0	0	0	0	0	0	0	0	0	0	0	0	0	0	0	0	0	0	0
a58a9be492f3e67f93b534d170516b22	Bacteria	Proteobacteria	Deltaproteobacteria	SAR324 clade(Marine group B)	#N/A	#N/A	#N/A	B14891_o_SAR324 clade(Marine group B)	Oligotroph	0	0	0	0	0	0	0	1.49068e-05	0	0	0	0	0	0	0	0	0	0	0	0	0	0	0	0	8.72256e-06	0	2.41714e-05	0
a6891605757284abbb6e0e590f496ea4	Bacteria	Latescibacteria	#N/A	#N/A	#N/A	#N/A	#N/A	B4213_o_NA	Oligotroph	0	0	0	0	0.000651855	0	0	0	0	0	0	0	0	0	0	0	0	0	0	0	0	0	0	0	0	0	0	0
a6ed77ba79ccfb3ea2c607acf4e8921c	Bacteria	Firmicutes	Clostridia	#N/A	#N/A	#N/A	#N/A	B17211_o_NA	Oligotroph	0	0	0	0	0	0	0	0	0	0	0	0	0	0	0	0	0	0	0	0	0	0	0	0	0	8.48323e-06	1.75792e-05	0
a7b1776b49f755e554f1e5ee2820d52e	Bacteria	Patescibacteria	Saccharimonadia	Saccharimonadales	uncultured bacterium	uncultured bacterium	uncultured bacterium	B8385_uncultured bacterium	Oligotroph	0	0	6.2951e-05	0	2.8653e-05	4.56662e-05	0	0	0	0	0	0	0	0	0	0	0	0	2.08283e-05	0	0	0	0	0	0	2.3753e-05	0	0
a8d7c7f3ceed107d617a875d5674f94b	Bacteria	Chloroflexi	Anaerolineae	RBG-13-54-9	#N/A	#N/A	#N/A	B431_o_RBG-13-54-9	Oligotroph	0	0	0	0	0.000453672	0.000438395	0.000275822	0.000421649	0	0.000343804	0.000517986	0.000915668	0	0.000586903	0.000321278	0	0.000291736	0	0.00066882	0.000289445	0.000942315	0.00106158	0.000939301	0	0.00151118	0.00213608	0.000279069	0
a98aaaa37992792a01263b14dd5624b3	Bacteria	Chloroflexi	Anaerolineae	SBR1031	#N/A	#N/A	#N/A	B2749_o_SBR1031	Oligotroph	0	0	0	0	0	0	0	0	0	0	0	0	0	0	3.38187e-05	9.97514e-05	5.17263e-05	0	0	6.71178e-05	3.31084e-05	0.000146425	0	0	0.000390335	0.000249407	2.1974e-05	0
aa8db548f161b9938e82885c2aff8906	Bacteria	Nitrospirae	Thermodesulfovibrionia	Thermodesulfovibrionales	Thermodesulfovibrionaceae	Thermodesulfovibrio	#N/A	B334_Thermodesulfovibrio	Oligotroph	0.000978088	0.00132349	0.00132953	0.00155735	0.00100047	0.00187779	0.000323981	0.000717655	0	0	0	0	0	0	0	0	0.00253459	0.00217458	0	0	1.78276e-05	1.83031e-05	3.48696e-05	0.000215346	0.000671637	0.00146081	1.97766e-05	1.06487e-05
aab41590380be13e66c894511da0e027	Bacteria	Proteobacteria	Gammaproteobacteria	Diplorickettsiales	Diplorickettsiaceae	uncultured	uncultured bacterium	B6711_uncultured	Oligotroph	0	0	0	0	0	0	0	0	0	0	0	0	0	0	0	0	0	0	0	0	0	0	5.44838e-05	3.58911e-05	1.30838e-05	0	0.000162607	0
aac7f37c5629bc02c4414d2ca0d2d57e	Bacteria	Bacteroidetes	Bacteroidia	Sphingobacteriales	NS11-12 marine group	#N/A	#N/A	B12663_f_NS11-12 marine group	Oligotroph	0	0	0	0	1.19387e-05	0	2.62687e-05	0	0	0	0	0	0	0	0	0	1.86215e-05	0	0	0	0	6.86365e-06	0	0	0	1.01799e-05	0	0
AACY020170993.10.1544	Bacteria	Proteobacteria	Deltaproteobacteria	Oligoflexales	0319-6G20	marine metagenome	marine metagenome	B4837_marine metagenome	Oligotroph	0	0	0	0	0	0	4.59703e-05	5.5368e-05	0	0	0	3.85721e-05	0	0	0	0	0	0	0	0	0	0	0	2.61026e-05	4.57934e-05	0.000188328	0	0
aaeca2b7bfc713fdf91baef469faf1fd	Bacteria	Acidobacteria	Subgroup 6	#N/A	#N/A	#N/A	#N/A	B161_o_NA	Oligotroph	0.000716642	0.000853865	0.000503608	0.000660694	0.00145175	0.00130971	0.00273414	0.0038715	0.00130212	0.00194316	0.0020862	0.0017827	0.000232204	0.0010641	0.000355097	0.000412434	0	0.000899432	0.00194629	0.00112422	0.000185916	0.000189894	0.000980708	0.00212573	0.0019146	0.00231932	0.000250503	0
AB179503.1.1499	Bacteria	Proteobacteria	Gammaproteobacteria	Salinisphaerales	Solimonadaceae	Polycyclovorans	uncultured bacterium	B1192_Polycyclovorans	Oligotroph	0.00116017	0.000114496	0.000566559	0.000328459	0.000207734	0.000314183	5.25374e-05	0	3.74037e-05	0.000116287	0	0	0	0	0	1.15098e-05	4.96573e-05	7.51424e-05	5.78564e-05	8.17998e-05	0	4.80456e-05	0	1.14199e-05	5.01547e-05	0.000200204	0.000177989	8.51899e-06
AB193261.1.1528	Bacteria	Actinobacteria	Thermoleophilia	Solirubrobacterales	Solirubrobacteraceae	Patulibacter	Patulibacter minatonensis	B8144_Patulibacter	Oligotroph	0	0	0	0	0	0	0	0	0	0	0	0	0	0	0	0	0	0	0	0	0	0	0	0	0.000196258	0	0	0
AB240223.1.1459	Bacteria	Chloroflexi	Anaerolineae	Anaerolineales	Anaerolineaceae	uncultured	uncultured Anaerolineaceae bacterium	B1101_uncultured	Oligotroph	0	0	0	0	0.000198183	0.000529728	0	0	0	0.000168531	0	0	0	0	0	0	0.00292771	5.4649e-05	0	0	0	0	0	0	0	0	0	0
AB240231.1.1447	Bacteria	Chloroflexi	OLB14	uncultured bacterium	uncultured bacterium	uncultured bacterium	uncultured bacterium	B22_uncultured bacterium	Oligotroph	0.000695633	0.00130214	0.00242991	0.00166872	0.0056709	0.00425974	0.00909992	0.00575402	0.00338504	0.0025583	0.00349997	0.00267489	0.00265344	0.00318134	0.00308314	0.00415503	0.00328979	0.00295105	0.00175884	0.00214987	0.0025468	0.00432639	0.00606078	0.00488445	0.00394914	0.00360028	0.00415528	0.00261959
AB240237.1.1458	Bacteria	Chloroflexi	JG30-KF-CM66	#N/A	#N/A	#N/A	#N/A	B88_o_NA	Oligotroph	0.000770331	0	0.00134715	0.00105711	0.00190781	0.00294273	0.00296837	0.00384595	0.000813531	0.000726369	0.00052749	0.00088045	0.00486727	0.00505175	0.0035256	0.00430082	0.00113591	0.00176243	0.000571622	0.00097111	0.00186171	0.00217807	0.00084123	0.00122845	0.00205198	0.00224466	0.00309393	0.000619757
AB240252.1.1510	Bacteria	Acidobacteria	Subgroup 6	unidentified	unidentified	unidentified	unidentified	B1590_unidentified	Oligotroph	0	0	0	0	0	0	0	0	0.000165979	0	0	0	0	0	0	0	0.000562782	0.000958635	0	0	0	0	0	0	0.000361986	0.000354599	0	0
AB240314.1.1514	Bacteria	Proteobacteria	Deltaproteobacteria	RCP2-54	#N/A	#N/A	#N/A	B95_o_RCP2-54	Oligotroph	0.00136325	0.00167474	0.000825918	0.00109864	0.00165948	0.00334459	0.000763982	0.00109671	0.00153589	0.00162801	0.00195076	0.00295831	0.00103027	0.00184481	0.00113856	0.00287361	0.00370774	0.0027074	0.000370281	0.000381732	0.00204763	0.00239313	0.00168464	0.00287618	0.00326006	0.00366136	0.000509796	0.00084551
AB240345.1.1468	Bacteria	Chloroflexi	Anaerolineae	Anaerolineales	Anaerolineaceae	uncultured	#N/A	B205_uncultured	Oligotroph	0.000163404	0.000238694	0	0	0.000491876	0.00254635	0.000133533	0.000347115	0.000458196	0.000342118	0.000601149	0.00122424	0	0.000118843	0.000648192	0.000368313	0.00254493	0.000107021	6.94277e-05	0	0.000534827	0.00106615	0.00215974	0.00459079	0.00116228	0.00190703	0.000224134	0.00322444
AB240352.1.1493	Bacteria	Bacteroidetes	Ignavibacteria	Ignavibacteriales	Ignavibacteriaceae	Ignavibacterium	uncultured bacterium	B202_Ignavibacterium	Oligotroph	0.000725979	0.00086939	0.000382742	0.00028693	0.000666181	0.00113617	0.00178846	0.00197195	0.000862623	0.000483684	0.000301762	0.000902252	0.000687595	0.0011409	0.000879287	0.000111261	0.000773826	0.000403037	0.00068502	0.000528552	0.000654527	0	0.00263048	0.00400838	0.000924591	0.00202919	0.000290056	6.17627e-05
AB240357.1.1489	Bacteria	Bacteroidetes	Bacteroidia	Chitinophagales	Chitinophagaceae	Flavisolibacter	#N/A	B1078_Flavisolibacter	Oligotroph	0.000161069	0	0.00036008	0	0	0	0	0.000342856	0.000273515	0	0	0	0	0	0	0	0	0	0	0	0.000249586	0.000221925	0	0.000593834	0.00112739	0.000673569	0	0
AB240366.1.1463	Bacteria	Chloroflexi	Anaerolineae	RBG-13-54-9	metagenome	metagenome	metagenome	B20_metagenome	Oligotroph	0.0050375	0.00248979	0.00456773	0.00333745	0.00483996	0.0031053	0.00955087	0.00590734	0.000850935	0.000852768	0.000874398	0.00103306	0.00690977	0.00420888	0.00566464	0.0034491	0.00143799	0.00233169	0.000833133	0.00213728	0.00618617	0.00747223	0.00512366	0.00324651	0.00277377	0.00266373	0.00718109	0.00140776
AB240368.1.1441	Bacteria	Chloroflexi	Chloroflexia	Chloroflexales	Roseiflexaceae	uncultured	uncultured bacterium	B850_uncultured	Oligotroph	0	0.000190179	0	0	0.000986139	0.00118184	0.000262687	0.000662287	4.20792e-05	0	0	0	6.76323e-05	0.000274254	0	9.59148e-05	0.000525539	0.000207211	0	0	0.000155355	0.00050791	0.000207038	0	0	0.000223957	0	0
AB240374.1.1507	Bacteria	Gemmatimonadetes	Gemmatimonadetes	Gemmatimonadales	Gemmatimonadaceae	uncultured	#N/A	B362_uncultured	Oligotroph	0	0.000182417	0	0	0.00162367	0.00287697	0.000313036	0.000721914	0.000194032	0.000101119	9.50433e-05	0.000618831	2.93073e-05	0	8.45468e-05	0	0.000422087	0.00062391	0.00015737	0.000130041	0.000303069	0	0.000329082	0.000730873	0.00188843	0.00289957	0	0
AB240375.1.1484	Bacteria	Bacteroidetes	Bacteroidia	Bacteroidales	Bacteroidetes vadinHA17	uncultured Alkaliflexus sp.	uncultured Alkaliflexus sp.	B2659_uncultured Alkaliflexus sp.	Oligotroph	0	0	0	0	0	0	0	0	0	0	0	0	0	0	0	0	0	0	0	0	0	0.000322592	0	0	0	0	0.000914117	0
AB252085.1.1289	Bacteria	Bacteroidetes	Bacteroidia	Cytophagales	Hymenobacteraceae	Hymenobacter	#N/A	B1704_Hymenobacter	Oligotroph	0.000114383	0	0	0	0.000253101	0.000109599	0.000429056	2.34249e-05	0	0	0	0	0	0	4.50916e-05	0	0	0	2.77711e-05	2.30717e-05	0	0	0.000274598	0	0.00030747	0	0.000287859	0.000323722
AB252878.1.1525	Bacteria	Planctomycetes	OM190	#N/A	#N/A	#N/A	#N/A	B4396_o_NA	Oligotroph	1.86747e-05	1.9406e-05	0	1.13262e-05	0	2.73997e-05	0	0.000125643	0	0	0	3.18639e-05	0	1.27985e-05	0	0	2.89667e-05	0	2.54568e-05	6.29229e-06	0	0	0	6.36251e-05	4.57934e-05	2.03598e-05	2.85662e-05	3.62057e-05
AB252884.1.1503	Bacteria	Proteobacteria	Gammaproteobacteria	JG36-GS-52	#N/A	#N/A	#N/A	B1886_o_JG36-GS-52	Oligotroph	0.000189081	0.000390061	0	1.13262e-05	0.00014804	0	0	0	0	0	0	0	0	0	0	0	0.000825552	0.000218596	0	1.4682e-05	0	0	6.53806e-06	0	0	5.93826e-05	0	0
AB252886.1.1502	Bacteria	Proteobacteria	Gammaproteobacteria	Steroidobacterales	Steroidobacteraceae	uncultured	uncultured gamma proteobacterium	B23_uncultured	Oligotroph	0.00216627	0.00272072	0.00181551	0.00264844	0.00406633	0.00397661	0.00539384	0.00418668	0.0036866	0.00272515	0.00302238	0.00224557	0.000937835	0.00190881	0.0042668	0.00361407	0.00924246	0.00397799	0.00159684	0.00013843	0.00480071	0.00525069	0.00390976	0.00348633	0.00340834	0.00278929	0.00543636	0.00504537
AB300067.1.1406	Bacteria	Planctomycetes	Phycisphaerae	MSBL9	SG8-4	#N/A	#N/A	B6132_f_SG8-4	Oligotroph	0	0	0	0	0	0	0	0	0	0	0	0	0	0	0	0	0.000190353	0.000127514	0	0	0	0	0	0	0	0	0	0
AB364804.1.1461	Bacteria	Acidobacteria	Acidobacteriia	Subgroup 13	uncultured bacterium	uncultured bacterium	uncultured bacterium	B1186_uncultured bacterium	Oligotroph	0	0.000254219	0	0	0.000107449	0.000714219	0	0	7.71452e-05	0	0	0.000110685	0	0.000170037	7.04557e-05	0	0.00116901	0	0	0.00022023	0.000267414	0.000240228	0	0	0	0	3.73557e-05	6.38925e-05
AB364845.1.1446	Bacteria	Nitrospirae	Thermodesulfovibrionia	uncultured	uncultured bacterium	uncultured bacterium	uncultured bacterium	B332_uncultured bacterium	Oligotroph	0.00112282	0.00159517	0.00192127	0.00431716	0.000756916	0.000856698	0.00011602	0.00116486	0	0	7.36585e-05	0.00022137	0.000279547	0	0	0	0.000862795	0.000450855	0.000136541	0	0	0	0.000150375	0.001018	8.06837e-05	0.000846627	0	0
AB364853.1.1469	Bacteria	Spirochaetes	Spirochaetia	Spirochaetales	Spirochaetaceae	Spirochaeta 2	Spirochaeta sp.	B1289_Spirochaeta 2	Oligotroph	0.000184413	0	0.000181299	0	8.83466e-05	0.000122385	0.000269254	0	0.000121562	0.000163475	0	0	0.000247985	0	0.000315641	0	0	0.000389374	0	0	0	0	0	0	0	0	0.00122834	8.73197e-05
AB364875.1.1461	Bacteria	Bacteroidetes	Ignavibacteria	Kryptoniales	BSV26	uncultured bacterium	uncultured bacterium	B2158_uncultured bacterium	Oligotroph	0.000291792	0.000306615	4.53248e-05	0.000258615	0.000171918	0.000453009	0	0	0	0	0	0	0	0	0	0	0	0	0	0	0	0	0	0	0	0	0	0
AB426203.1.1437	Bacteria	Proteobacteria	Deltaproteobacteria	Syntrophobacterales	Syntrophaceae	Desulfobacca	uncultured Desulfobacca sp.	B72_Desulfobacca	Oligotroph	0.000560241	0.00163399	0.000752894	0.00161209	0.00213465	0.00459767	0.00487066	0.00514284	0.00105432	0.00107354	0.000270873	0.000645663	0.00309531	0.000864813	0.000817286	0.00200846	0.0016449	0.000569261	0	0	0.00806571	0.00547262	0.00286149	0.0041291	0.000732695	0	0.00205896	0.00334583
AB426207.1.1415	Bacteria	Gemmatimonadetes	Gemmatimonadetes	Gemmatimonadales	Gemmatimonadaceae	uncultured	uncultured bacterium	B506_uncultured	Oligotroph	0.000476205	0.00035513	0.000304683	6.2294e-05	0.000322346	0.000854871	0.000525374	0.000777282	0.000427805	0.000203923	0.000178206	0.000110685	0.000448628	0.000592388	0.000310005	0.000274316	0.00028346	0.000382543	8.79418e-05	6.92152e-05	0.00071565	0.00119885	0.000392283	0.000541629	0.000198438	0.000290127	0.000410913	5.9633e-05
AB426210.1.1416	Bacteria	Acidobacteria	Thermoanaerobaculia	Thermoanaerobaculales	Thermoanaerobaculaceae	Thermoanaerobaculum	uncultured bacterium	B9702_Thermoanaerobaculum	Oligotroph	0	0	0	0	0.000152816	0	0	0	0	0	0	0	0	0	0	0	0	0	0	0	0	0	0	0	0	0	0	0
AB426221.1.1401	Bacteria	Acidobacteria	Subgroup 18	#N/A	#N/A	#N/A	#N/A	B799_o_NA	Oligotroph	0	0	0	0.000400192	0.00121059	0	0.000310847	0	0	0	0	0	0	0	0.000983561	0	0.000957971	0	0.000719734	0.000400609	0	0.000157864	0	0	0	0	0.0015228	0
AB447759.1.1450	Bacteria	Armatimonadetes	uncultured	uncultured bacterium SJA-121	uncultured bacterium SJA-121	uncultured bacterium SJA-121	uncultured bacterium SJA-121	B7370_uncultured bacterium SJA-121	Oligotroph	0	0	0	0	0	0.000195451	0	0	0	0	0	0	0	0	0	0	0	0	0	0	0	0	0	0	0	0	0	0
AB486056.1.1372	Bacteria	Proteobacteria	Gammaproteobacteria	Betaproteobacteriales	SC-I-84	#N/A	#N/A	B181_f_SC-I-84	Oligotroph	0.00623035	0.00706961	0.0030846	0.00417181	0	0	0	0.00046211	0.000364686	0.000242685	0	0.00104145	0	9.69029e-05	0	0	0.00137799	0.00108615	0	0	0	0	0	0.0024928	0.000713069	0.000264677	0.000483427	0.000298165
AB486181.1.1305	Bacteria	Cyanobacteria	Oxyphotobacteria	Oxyphotobacteria Incertae Sedis	Unknown Family	#N/A	#N/A	B3922_f_Unknown Family	Oligotroph	3.03464e-05	0	0	1.51016e-05	3.58162e-05	0	0	4.25908e-05	0	0	0	0	0	0	0	4.02842e-05	0	0	0	4.4046e-05	0	0	0	3.42596e-05	8.06837e-05	0.000232441	0	2.76867e-05
AB486233.1.1370	Bacteria	Planctomycetes	Planctomycetacia	Gemmatales	Gemmataceae	uncultured	uncultured bacterium	B19028_uncultured	Oligotroph	0	0	0	0	0	0	0	0	0	0	0	0	0	0	0	0	1.03453e-05	0	0	0	0	0	0	0	0	0	6.59219e-06	0
AB486311.1.1379	Bacteria	Proteobacteria	Deltaproteobacteria	Myxococcales	Archangiaceae	Anaeromyxobacter	#N/A	B1038_Anaeromyxobacter	Oligotroph	0.000730648	0.00197941	0	0	0	0.00111973	0	0	0	0	0	0	0	0	0	0	0	0	0	0	0	0	0	0	0	0	0.000243911	0
AB486559.1.1325	Bacteria	Cyanobacteria	Oxyphotobacteria	Oxyphotobacteria Incertae Sedis	Unknown Family	uncultured bacterium	uncultured bacterium	B2697_uncultured bacterium	Oligotroph	7.46988e-05	2.9109e-05	1.76263e-05	0	0.000164754	0.000202758	0.000212339	0.0001874	0	0	0	0	3.15617e-05	0	0	0	0	0	0	2.9364e-05	0	0	2.17935e-05	3.09968e-05	3.92515e-05	0	0.000112067	0
AB486755.1.1397	Bacteria	Acidobacteria	Subgroup 6	uncultured Holophaga sp.	uncultured Holophaga sp.	uncultured Holophaga sp.	uncultured Holophaga sp.	B922_uncultured Holophaga sp.	Oligotroph	0	0	0	0	4.05917e-05	9.8639e-05	0	0	0	0	0	0.000177767	0	0	0	0	0.00161593	0	3.00853e-05	0	0	0	0.00105481	0.00040459	0.000652011	0.000549713	0	0.000149082
AB486896.1.1477	Bacteria	Firmicutes	Clostridia	Clostridiales	Ruminococcaceae	#N/A	#N/A	B3383_f_Ruminococcaceae	Oligotroph	0	0	0.000241732	0	0.000205346	0.000363503	0	0	0	0	0	0	0	0	0	0	0	0	0	0	0	0	0	0	0	0	0	0
AB486936.1.1369	Bacteria	Bacteroidetes	Ignavibacteria	Ignavibacteriales	uncultured bacterium	uncultured bacterium	uncultured bacterium	B1433_uncultured bacterium	Oligotroph	0.000221762	0	0.000473392	0	0	0	0	0	0	0	0	0	0	0	0	0.000178402	0.000660028	0.00023909	0	8.80921e-05	0	0	0	0	0.000320554	0	0.000329609	0.000351409
AB487690.1.1322	Bacteria	Firmicutes	Clostridia	Clostridiales	Christensenellaceae	Christensenellaceae R-7 group	uncultured Christensenellaceae bacterium	B13939_Christensenellaceae R-7 group	Oligotroph	0	0	0	0	0	0	0	2.12954e-05	0	0	0	0	0	0	0	0	0	0	0	0	0	0	0	0	0	0	3.73557e-05	0
AB487770.1.1360	Bacteria	Proteobacteria	Gammaproteobacteria	Betaproteobacteriales	Burkholderiaceae	#N/A	#N/A	B1232_f_Burkholderiaceae	Oligotroph	0	0	0	0	0.00065663	0	0	0	0	0	0	0	0	0	0	0	0	0	0	0	0	0	0	0	0	0	0.00293572	0
AB488249.1.1356	Bacteria	Proteobacteria	Deltaproteobacteria	Myxococcales	Archangiaceae	Anaeromyxobacter	uncultured bacterium	B2990_Anaeromyxobacter	Oligotroph	0	0	0	0	0	0.000189971	8.97515e-05	0.000379058	0	0	0	0	0	0	0	0	7.65549e-05	0	0	0	9.93251e-05	0	0	0	0	0	0	0.000140563
AB488306.1.1350	Bacteria	Acidobacteria	Acidobacteriia	Solibacterales	Solibacteraceae (Subgroup 3)	Candidatus Solibacter	uncultured organism	B955_Candidatus Solibacter	Oligotroph	0	0	0	0	0	0	0	0	0	0	0	0	0	0	0	0	0.000616578	0.000220873	0	0.00120183	0	0	0	0	0	0.00223957	0	0
AB488375.1.1379	Bacteria	Proteobacteria	Gammaproteobacteria	Betaproteobacteriales	Nitrosomonadaceae	MND1	#N/A	B2128_MND1	Oligotroph	0	0	0	0	0	0	0	0	0	0	0	0	0	0	0	0	0	0	0	0	0	0	5.88425e-05	0.000125619	0.000235509	0.000946729	0	0
AB523413.1.1481	Bacteria	Actinobacteria	Actinobacteria	Micrococcales	Intrasporangiaceae	Oryzihumus	#N/A	B804_Oryzihumus	Oligotroph	0	0.00041917	0.000523753	0.000198208	0	0	0	0	0	0	0	0	0	0	0	0	0	0.00263226	0	0	0.00046097	0.000366062	0	0	0.000152645	0.000320666	0.00138216	0
ab5e8d680f317860a58d8c0ca00da680	Bacteria	Acidobacteria	Blastocatellia (Subgroup 4)	11-24	#N/A	#N/A	#N/A	B17562_o_11-24	Oligotroph	0	0	0	0	0	0	0	0	0	0	0	0	0	0	0	0	0	0	0	0	0	0	0	0	0	0	2.63688e-05	0
AB630409.1.1413	Bacteria	Proteobacteria	Alphaproteobacteria	Rhizobiales	Rhizobiales Incertae Sedis	Bauldia	metagenome	B2688_Bauldia	Oligotroph	0.000196084	0	0	0	0	0.000171705	0	0	0	0	0	0	0	0	0	0	0.000134488	0	0	0	0	0	0	9.62533e-05	0	0.000417375	0	0
AB630472.1.1501	Bacteria	Proteobacteria	Deltaproteobacteria	Syntrophobacterales	Syntrophaceae	Desulfobacca	#N/A	B2377_Desulfobacca	Oligotroph	0	0	0	0	0.000384427	0.000692299	0	0	0	0	0	0	0	0	0	0	0.000246217	0	0	0	0	0	0	0	0	0	0	0
AB630513.1.1459	Bacteria	Bacteroidetes	Bacteroidia	Chitinophagales	Saprospiraceae	uncultured	uncultured bacterium	B5845_uncultured	Oligotroph	0	0	0	0	3.34284e-05	0	0	0	0	0	0	0	0	0	0	0	0.000217251	0	0	0	0	0	0	0	0	0	0	8.73197e-05
AB630641.1.1430	Bacteria	Acidobacteria	Acidobacteriia	Solibacterales	Solibacteraceae (Subgroup 3)	Candidatus Solibacter	#N/A	B1095_Candidatus Solibacter	Oligotroph	9.10392e-05	6.59805e-05	0	7.55079e-05	0.000348611	0.000339756	8.53734e-05	0.000391835	0	0	0	0	0	0	0	0	0.000182077	0	0	0	0.00012734	6.40608e-05	0.0005383	0.000585677	0.000180993	0.000653209	4.39479e-05	0
AB637273.1.1493	Bacteria	Firmicutes	Bacilli	Bacillales	Paenibacillaceae	#N/A	#N/A	B4085_f_Paenibacillaceae	Oligotroph	0	0	0	0	0	0.000173532	0	0	0	0	0	0	0	0	0	0	0	0	0	0	0	0	7.19186e-05	0.00018435	9.81288e-05	0	0	0
AB648943.1.1485	Bacteria	Actinobacteria	Actinobacteria	Micrococcales	Microbacteriaceae	Agromyces	#N/A	B1252_Agromyces	Oligotroph	0	0	0	0	0.000107449	0	0	0	0	0	0	0	0	0	0	0	0.000386913	0	0	0	0	0	0	0	0.000686902	0.000688838	0	0.00130341
AB649023.1.1495	Bacteria	Proteobacteria	Gammaproteobacteria	Betaproteobacteriales	Burkholderiaceae	#N/A	#N/A	B326_f_Burkholderiaceae	Oligotroph	0.00116017	0.00238694	0	0.000615389	0	0	0.00197672	0.00279183	0	0	0	0	0	0	0	0	0	0	0	0	0	0	0.00246921	0.000988636	0.00117755	0	0.00226991	0.00113729
AB672107.1.1459	Bacteria	Proteobacteria	Gammaproteobacteria	Betaproteobacteriales	Nitrosomonadaceae	MND1	uncultured Rhodocyclaceae bacterium	B801_MND1	Oligotroph	0	0.000357071	0.000302165	0.00127986	0.000298468	0.000809205	0.000148856	0	0.00015429	0	0	0	0	0	0	0	0	0.000878939	0	0.000165697	0.000351458	0.000375213	0	0	0.000292206	0.000580253	0	0
AB672111.1.1410	Bacteria	Chloroflexi	TK10	#N/A	#N/A	#N/A	#N/A	B1245_o_NA	Oligotroph	0	2.9109e-05	0	0	2.38775e-05	0	0	0	7.0132e-06	0	0	0.000184475	0	0	0	0	0.000335187	3.18786e-05	5.78564e-05	0	0	0.000144137	0	0	0.00105543	0.00115542	0	3.19462e-05
AB672136.1.1423	Bacteria	Acidobacteria	Acidobacteriia	Acidobacteriales	uncultured	#N/A	#N/A	B47_f_uncultured	Oligotroph	0.011681	0.011533	0.00989087	0.0135272	0.00431466	0.00362407	0	0	0	0	0	0.000362242	0	0	0	0	0.000246217	0.010422	0.000971988	0.00724872	0	0	0	0	0.00103798	0.000514084	0	0
AB672162.1.1472	Bacteria	Zixibacteria	uncultured bacterium	uncultured bacterium	uncultured bacterium	uncultured bacterium	uncultured bacterium	B943_uncultured bacterium	Oligotroph	0.000149398	9.89707e-05	0	0	0.000102673	0.000186318	8.75624e-06	0	5.61056e-05	3.53915e-05	0.000180582	0.000140872	5.41058e-05	0	7.32739e-05	0.000220604	0.000128281	0.000116129	0.000129598	0	0.000247039	0.000274546	0.000165631	0.000264289	0.000837366	0.00115033	0	1.27785e-05
AB672210.1.1459	Bacteria	Proteobacteria	Gammaproteobacteria	Betaproteobacteriales	Nitrosomonadaceae	Ellin6067	#N/A	B199_Ellin6067	Oligotroph	0	0	0	0	0	0	0.00129155	0	0	0.000667383	0	0	0.00103477	0.00484515	0	0	0	0	0	0	0	0.00091973	0	0	0.00580486	0.00788771	0.00305658	0
AB672211.1.1438	Bacteria	Armatimonadetes	Chthonomonadetes	Chthonomonadales	uncultured bacterium	uncultured bacterium	uncultured bacterium	B13074_uncultured bacterium	Oligotroph	0	0	0	0	0	0	0	0	0	0	0	0	0	0	0	0	0	2.04934e-05	0	0	0	0	0	0	0	2.3753e-05	1.97766e-05	0
AB672227.1.1427	Bacteria	Chloroflexi	Anaerolineae	RBG-13-54-9	uncultured Caldilineaceae bacterium	uncultured Caldilineaceae bacterium	uncultured Caldilineaceae bacterium	B531_uncultured Caldilineaceae bacterium	Oligotroph	0.00136092	0.00206092	0.00147809	0.00185938	0.000133714	0.000374463	4.37812e-05	4.25908e-05	0	0	0	0	3.38162e-05	4.57089e-05	1.97276e-05	3.2611e-05	7.8624e-05	6.83113e-05	5.09137e-05	0.000281056	5.34827e-05	5.03335e-05	0.00010025	7.34135e-05	0.000789392	0.000931459	6.37245e-05	0
AB672228.1.1423	Bacteria	Acidobacteria	Acidobacteriia	Solibacterales	Solibacteraceae (Subgroup 3)	#N/A	#N/A	B1358_f_Solibacteraceae (Subgroup 3)	Oligotroph	0	0	0	0	0	0	0.00021015	0	0	0	0	0	0	0	0.000155002	0	2.89667e-05	0	0	0	0	3.43183e-05	0.000156913	0.000703139	0.000390335	0.000732951	9.22907e-05	0.00017251
AB672235.1.1416	Bacteria	Chloroflexi	Anaerolineae	RBG-13-54-9	#N/A	#N/A	#N/A	B1890_o_RBG-13-54-9	Oligotroph	0.000242771	0	0	0	0	0	0	0.000413131	0	0	0	0	0	0	0	0	0	0	0	0	0	0.000210485	0	0	0.000152645	0.000549713	0.000230727	0
AB672246.1.1441	Bacteria	Acidobacteria	Acidobacteriia	Subgroup 12	uncultured bacterium	uncultured bacterium	uncultured bacterium	B1465_uncultured bacterium	Oligotroph	0.000151732	0.000248397	0.000249286	0.000411518	0.000284142	0.000102292	8.31843e-05	8.73111e-05	0	0	0	0	0	0	0	0	0.000132419	8.42506e-05	1.15713e-05	3.98512e-05	3.31084e-05	9.60911e-05	0	1.95769e-05	4.14322e-05	0.000407195	0.000125252	0
AB672248.1.1444	Bacteria	Actinobacteria	MB-A2-108	#N/A	#N/A	#N/A	#N/A	B668_o_NA	Oligotroph	0.000221762	8.34459e-05	0	0	0.00056112	0.00096447	0.000402787	0.000142679	0.000210396	0	0.000258993	9.22376e-05	0	0	0	0	0.000151041	0.000553322	0.000335567	0	0	0	0.000193962	0.000125619	0.00085263	0.0015694	0.000621863	0.000144823
AB672250.1.1470	Bacteria	Actinobacteria	Thermoleophilia	Gaiellales	uncultured	#N/A	#N/A	B51_f_uncultured	Oligotroph	0.00376062	0.00517559	0.00407167	0.00567819	0.000341448	0.00174628	0.000667663	0.00127559	0	0	0	0	0.00381221	0.00236041	0.00227995	0.00209862	0.000237941	0.00636889	0.000814619	0.00422003	0.000308162	0.00253955	0.00329082	0.00246669	0.00572418	0.00521379	0.00536165	0.000204456
AB672270.1.1457	Bacteria	Acidobacteria	Acidobacteriia	Subgroup 13	#N/A	#N/A	#N/A	B539_o_Subgroup 13	Oligotroph	0	0	0	0	0.000171918	0.00102658	0.000383086	0.000662287	9.81848e-05	0.000207293	0.000225728	0.000290129	0	0.000671007	0.000310005	0.000636874	0	0	0.000303168	8.38972e-05	0	0.000688653	0.000119864	0.000628094	0.000242051	0.00229896	0.0001692	0
AB672291.1.1441	Bacteria	Actinobacteria	MB-A2-108	uncultured alpha proteobacterium	uncultured alpha proteobacterium	uncultured alpha proteobacterium	uncultured alpha proteobacterium	B2669_uncultured alpha proteobacterium	Oligotroph	0	0	0	0	0.000179081	0	0	0	0	0	0	0	0	0	0	0	0	0.000314232	0	0	0	0	0	0	0	0.000578556	0	0
AB672296.1.1440	Bacteria	Acidobacteria	Acidobacteriia	Acidobacteriales	uncultured	#N/A	#N/A	B810_f_uncultured	Oligotroph	0.000315136	0	0	0	0	0.00109416	0	0.000562199	0	0	0.000482345	0	0	0	0.000507281	0.00036064	0	0	0.000411938	0.000230717	0	0	0	0	9.37675e-05	0.00166611	0	0
AB679972.1.1360	Bacteria	Bacteroidetes	Bacteroidia	Cytophagales	Microscillaceae	Ohtaekwangia	uncultured Bacteroidetes bacterium	B6714_Ohtaekwangia	Oligotroph	0	0	0	0	4.53672e-05	0	0	0	0	0	0	0	0	0	0	0	7.44859e-05	0	0	0	0	0	0	0	0.000141742	0	1.53818e-05	0
AB685270.1.1475	Bacteria	Actinobacteria	Actinobacteria	Frankiales	Nakamurellaceae	Nakamurella	#N/A	B242_Nakamurella	Oligotroph	0.00122553	0.00028915	0.00136981	0.00238794	0.00161889	0.00178646	0.00201612	0.00326458	0	0	0	0	0.000293073	0.000343731	0	0	0	0	0.00204812	0.00166955	0	0	0.000621115	0	0.00179249	0.0014659	0.00152939	0
AB696397.1.1333	Bacteria	Cyanobacteria	Oxyphotobacteria	Oxyphotobacteria Incertae Sedis	Unknown Family	Leptolyngbya EcFYyyy-00	uncultured bacterium	B4108_Leptolyngbya EcFYyyy-00	Oligotroph	0	0	7.55413e-05	0	2.62652e-05	6.02794e-05	0	0	0	0	0	0	0	0	0	0	7.24168e-05	0	3.00853e-05	0	0	0	0	0	0.000209341	0.000111979	0	0
ab697e9b4e5a3b8110497cf5ee501054	Bacteria	WS4	uncultured bacterium	uncultured bacterium	uncultured bacterium	uncultured bacterium	uncultured bacterium	B5099_uncultured bacterium	Oligotroph	0	0	0	0	0	0	0	4.25908e-05	6.31188e-05	0	0	0	0	0	0	0	0	0	0	0	0	6.86365e-05	0	0	8.72256e-05	7.80457e-05	8.13037e-05	0
AB698718.1.1455	Bacteria	Proteobacteria	Alphaproteobacteria	Rhizobiales	Beijerinckiaceae	Methylobacterium	#N/A	B10466_Methylobacterium	Oligotroph	0	0	0	0	5.73059e-05	0	0	0	0	0	0	0	0	0	0	0	0	0	0	0	0	0	0	0	0	0	6.81193e-05	0
AB753925.1.1466	Bacteria	Actinobacteria	Acidimicrobiia	Microtrichales	Ilumatobacteraceae	CL500-29 marine group	#N/A	B3160_CL500-29 marine group	Oligotroph	0	0	0	0	0	0.000180838	0	0.000178881	0	0.00013314	0	0	0	0	0	0	0	0	0	0	0	0	0	0.000148458	0	0	6.15271e-05	9.79684e-05
AB806459.1.1413	Bacteria	Proteobacteria	Alphaproteobacteria	Rhizobiales	Methyloligellaceae	uncultured	#N/A	B67_uncultured	Oligotroph	0.00168773	0.00368908	0.00297381	0.00441155	0.0043457	0.00292812	0.00343464	0.00194001	0.00228864	0.000911754	0.000781731	0.000791566	0.00107986	0	0	0.000679077	0	0.00625732	0.00341353	0.00224844	0.000672355	0.000521638	0.00718096	0.00504759	0.00182956	0.00140482	0	0
AB821191.1.1503	Bacteria	Proteobacteria	Deltaproteobacteria	Myxococcales	BIrii41	uncultured Sorangiineae bacterium	uncultured Sorangiineae bacterium	B2225_uncultured Sorangiineae bacterium	Oligotroph	0	0	0	0	0	0.000109599	0	0	0	0	0	0	0	0	0	0	0.000562782	0	0	0	0	0	0	0	0.000427405	0.000341026	0	0
ab92036c14034395d9c08c946aa7ac2c	Bacteria	Planctomycetes	Planctomycetacia	Pirellulales	Pirellulaceae	uncultured	uncultured soil bacterium	B11615_uncultured	Oligotroph	0	0	0	0	5.49182e-05	0	0	0	0	0	0	0	0	0	0	0	0	2.50475e-05	0	0	0	0	0	0	0	1.52698e-05	0	0
AB930546.1.1449	Bacteria	Bacteroidetes	Ignavibacteria	OPB56	uncultured bacterium	uncultured bacterium	uncultured bacterium	B14300_uncultured bacterium	Oligotroph	0	0	0	0	9.55098e-06	3.83596e-05	0	0	0	0	0	0	0	0	0	0	0	0	0	0	0	0	0	0	0	0	0	0
AB930678.1.1461	Bacteria	Bacteroidetes	Ignavibacteria	Kryptoniales	BSV26	uncultured Chlorobi bacterium	uncultured Chlorobi bacterium	B569_uncultured Chlorobi bacterium	Oligotroph	0.000709639	0.000448279	0	0	0	0.000518768	0.000998212	0.00174196	0	0.000239314	0.000415814	0.000199569	0	0	0.000267732	0	6.00025e-05	0	0	0.000201353	0.00171654	0.000258531	0.000453305	0.000376856	0.000141742	0.000812694	0	0
abfa62ac6f657ef47af6ad3798e5d69c	Bacteria	Proteobacteria	Deltaproteobacteria	Myxococcales	bacteriap25	uncultured Syntrophobacterales bacterium	uncultured Syntrophobacterales bacterium	B4754_uncultured Syntrophobacterales bacterium	Oligotroph	0	4.65744e-05	1.00722e-05	0	9.78976e-05	0	0	0	0	0	0	0	0	0	0	0	0	0	0	6.29229e-05	0	0	0	0	0.000143922	2.3753e-05	9.88828e-05	0
ac383a1eb0285329d4f7804f83106b2e	Bacteria	Actinobacteria	Thermoleophilia	Gaiellales	uncultured	uncultured organism	uncultured organism	B2072_uncultured organism	Oligotroph	0	0	0	0	0.000124163	0.000115079	0.000175125	0.000174622	0	0	0	0	0	0	0	0	0	0	2.31426e-05	0.000201353	9.67783e-05	0.000183031	0.000161272	9.78847e-05	0	0	0.000349386	0
ac44122eb59754c6758cb5ddcea20c89	Bacteria	Acidobacteria	Subgroup 25	uncultured soil bacterium	uncultured soil bacterium	uncultured soil bacterium	uncultured soil bacterium	B3663_uncultured soil bacterium	Oligotroph	0.000100377	5.62775e-05	0	0	0.000167142	5.11461e-05	0	0	0	0	0	0	0	0	0	0	1.24143e-05	0.000375712	0	0	0	0	0	0	0	0	0	0
ad522e772da2cbc4aa8c0945796f96c4	Bacteria	Chloroflexi	Anaerolineae	SBR1031	uncultured bacterium	uncultured bacterium	uncultured bacterium	B4448_uncultured bacterium	Oligotroph	4.90211e-05	0	0	0	7.64079e-05	0.000136999	5.25374e-05	6.81453e-05	0	0	0	0	0	0	0	0	3.31048e-05	0	6.94277e-06	0	1.52808e-05	0	0	8.15706e-06	6.97805e-05	0	0	8.51899e-06
ad8dfa80aba77982a8426e883ce83ea0	Bacteria	Chloroflexi	Chloroflexia	Chloroflexales	Herpetosiphonaceae	Herpetosiphon	uncultured Chloroflexi bacterium	B17225_Herpetosiphon	Oligotroph	0	0	0	0	3.10407e-05	0	0	0	0	0	0	0	0	0	0	0	0	0	0	0	0	0	0	0	0	0	0	0
ae62e8c05200ff7f32d598758e5f3ebc	Bacteria	Chloroflexi	Anaerolineae	Anaerolineales	Anaerolineaceae	Anaerolinea	#N/A	B2740_Anaerolinea	Oligotroph	0	0	0	0	0	0	0	0	0	0	0	0	0	0	0	0	0	0	0	0	0	0	0	0	0	0	0.0011778	0
aea6e7ac6d2be12cf2a63788b08d22af	Bacteria	Planctomycetes	Planctomycetacia	Gemmatales	Gemmataceae	uncultured	uncultured bacterium	B8845_uncultured	Oligotroph	0	0	0	0	0.000112224	5.47994e-05	0	0	0	0	0	0	0	0	0	0	0	0	0	0	0	0	0	0	0	0	0	0
aeec70b15ec9cd5c0481aedf86e4984b	Bacteria	Actinobacteria	Coriobacteriia	OPB41	#N/A	#N/A	#N/A	B1912_o_OPB41	Oligotroph	0	0	0.000747858	0	0.000370101	0	0	0	0	0	0	0	0	0	0	0	0	0	0	0.000295738	0	0	0	0	0	0	0.000621863	0
af3ba7a6e8541ecc0279ed92ad670467	Bacteria	Actinobacteria	Coriobacteriia	#N/A	#N/A	#N/A	#N/A	B4875_o_NA	Oligotroph	0.000144729	9.31489e-05	7.30232e-05	0	4.53672e-05	5.29728e-05	0	0	0	0	0	0	0	0	0	0	1.65524e-05	0	0	0	0	0	0	0	0	1.69665e-05	2.41714e-05	0
AF407416.1.1463	Bacteria	Proteobacteria	Gammaproteobacteria	Betaproteobacteriales	Burkholderiaceae	Polaromonas	#N/A	B4890_Polaromonas	Oligotroph	0	0	0	0	0	0	0	0	0	0	0	0	0	0	0	0	0	0	0	0	0	0	0	0	0	0	0.00047244	0
AF507696.1.1407	Bacteria	Patescibacteria	Saccharimonadia	Saccharimonadales	uncultured soil bacterium	uncultured soil bacterium	uncultured soil bacterium	B13944_uncultured soil bacterium	Oligotroph	0	0	0	0	0	4.93195e-05	0	0	0	0	0	0	0	0	0	0	0	0	0	0	0	0	0	0	0	0	0	0
AF507705.1.1443	Bacteria	Planctomycetes	Phycisphaerae	Tepidisphaerales	WD2101 soil group	uncultured soil bacterium	uncultured soil bacterium	B1131_uncultured soil bacterium	Oligotroph	0	0	0	0	0	0.000509635	0	0	0	0	0	0.00125779	0	0	0	0	0	0	0	0	0	0	0	8.80962e-05	0.000152645	0.00113166	0	0
AF523974.1.1276	Bacteria	Proteobacteria	Gammaproteobacteria	Diplorickettsiales	Diplorickettsiaceae	Aquicella	#N/A	B4398_Aquicella	Oligotroph	0	0	0	0	0	0.000270344	0	8.30521e-05	0	0	0	0	0	0	0	0	0	0	0	0	0	0	0	0	0.000146103	0	0	0
AF529095.1.1440	Bacteria	Proteobacteria	Gammaproteobacteria	Betaproteobacteriales	Burkholderiaceae	#N/A	#N/A	B2006_f_Burkholderiaceae	Oligotroph	0	0	0	0.000632379	0	0.000884097	0	0	0	0	0	0	0	0	0	0	0	0	0	0	0	0	0	0	0	0	0	0
AF529116.1.1462	Bacteria	Firmicutes	Clostridia	Clostridiales	Syntrophomonadaceae	Syntrophomonas	uncultured Gram-positive bacterium	B12128_Syntrophomonas	Oligotroph	0	0	0	0	0	0	0	0	0	0	0	0	0	0	0	0	0	0	0	0	0	0	0	0	0	0	8.56985e-05	0
AF529126.1.1427	Bacteria	Acidobacteria	Holophagae	Holophagales	Holophagaceae	#N/A	#N/A	B4634_f_Holophagaceae	Oligotroph	0	0	0	0	0	0	0	0	0	0	0	0	0	0	0	0	0	0	0	0	0	0	0	0.000319757	8.06837e-05	0	0	0
AJ271048.1.1431	Bacteria	Armatimonadetes	Fimbriimonadia	Fimbriimonadales	Fimbriimonadaceae	uncultured bacterium GC55	uncultured bacterium GC55	B7214_uncultured bacterium GC55	Oligotroph	0	0	0	0	0	0.000204585	0	0	0	0	0	0	0	0	0	0	0	0	0	0	0	0	0	0	0	0	0	0
AJ318128.1.1479	Bacteria	Proteobacteria	Deltaproteobacteria	Myxococcales	Polyangiaceae	Pajaroellobacter	uncultured soil bacterium	B2660_Pajaroellobacter	Oligotroph	0	0	0	0	0	0.000473102	0	0	0	0	0	0	0	0.000151754	0	0	0	0	0	0	0	0	0	0	0	0.000364779	0	0
AJ390482.1.1402	Bacteria	Latescibacteria	uncultured soil bacterium PRR-12	uncultured soil bacterium PRR-12	uncultured soil bacterium PRR-12	uncultured soil bacterium PRR-12	uncultured soil bacterium PRR-12	B1285_uncultured soil bacterium PRR-12	Oligotroph	0	0	0	0	0	0	0	0.000132031	0.000172992	0	0	0	0	0.000195634	0	0.000134281	0	0	0	0	0.000257227	0	0.000111147	0.000752081	0.000226787	0	0.00109211	0
AJ458505.1.1405	Bacteria	Proteobacteria	Alphaproteobacteria	Rhizobiales	Beijerinckiaceae	Methylocystis	#N/A	B13_Methylocystis	Oligotroph	0.00680693	0.00786914	0.00608107	0.00643705	0.00700565	0.0062928	0.00837535	0.00692739	0.00447909	0.00439529	0.00289882	0.00398131	0.00309756	0.00369328	0.00445844	0.00523887	0.00417121	0.00476357	0.00178198	0.00219181	0.00847574	0.00749282	0.00489918	0.00369352	0.00468183	0.00425349	0.00888188	0.00772247
AJ532716.1.1339	Bacteria	Proteobacteria	Deltaproteobacteria	Desulfarculales	Desulfarculaceae	uncultured	metagenome	B4512_uncultured	Oligotroph	0	0	0	0	0	0	0	0	0	0	0	0	0	0	0	0	0	0	0	0	0.000140074	0	0	7.99392e-05	0	0.000239227	0	0
AJ534620.1.1236	Bacteria	Proteobacteria	Alphaproteobacteria	Rhizobiales	uncultured	uncultured Hyphomicrobiaceae bacterium	uncultured Hyphomicrobiaceae bacterium	B408_uncultured Hyphomicrobiaceae bacterium	Oligotroph	0.00153366	0.00133707	0.00164428	0.00177821	0	0.000268517	0.000146667	0.000327949	5.37678e-05	8.0895e-05	0	6.8759e-05	0.00022995	0	0.000304369	0.000836377	0	0.00183757	0.000111084	6.92152e-05	0	0.00154432	0.000128582	0.000189244	0.000329277	0.000363082	0.000450466	0
AJ536856.1.1308	Bacteria	Proteobacteria	Alphaproteobacteria	Rhizobiales	Xanthobacteraceae	Pseudolabrys	#N/A	B602_Pseudolabrys	Oligotroph	0	0	0	0	0	0.00200931	0.000394031	0.000434426	0	0.000540985	0	0	0	0	0	0	0.000620716	0	0	0	0	0	0	0.00157105	0	0.000878863	0	0.0012459
AM071371.1.1214	Bacteria	Proteobacteria	Alphaproteobacteria	Rhizobiales	Xanthobacteraceae	#N/A	#N/A	B21_f_Xanthobacteraceae	Oligotroph	0.000485542	0.00775659	0.00311734	0.00774522	0.00243073	0.00725362	0.00170747	0.0080667	0.0014003	0.00600308	0.000917167	0.0057724	0.000840895	0.00796433	0.00242649	0.0073183	0.000883485	0.000692221	0.000349453	0.00163809	0.000817522	0	0.00209218	0.00557943	0.00151118	0.00422465	0.00175352	0.000577162
AM086112.1.1468	Bacteria	Proteobacteria	Deltaproteobacteria	Syntrophobacterales	Syntrophobacteraceae	uncultured	uncultured proteobacterium	B275_uncultured	Oligotroph	0	3.49308e-05	0	0	0.000795119	0.00269065	0.00119742	0.00236805	0	0.000116287	0.000128308	0.000464542	0.000464408	0.000665522	0.000591828	0.00143872	0.00119798	0.000357496	0	0	0.000539921	0.00168846	0.00109186	0.00214368	0.000263857	0.000968785	0.000966854	9.15792e-05
AM157317.1.1235	Bacteria	Proteobacteria	Deltaproteobacteria	Myxococcales	Blfdi19	uncultured bacterium	uncultured bacterium	B2916_uncultured bacterium	Oligotroph	7.23645e-05	0	0	0	0.000436958	0.000228331	6.34828e-05	0	0	0	0	0	0	0	0	0	6.62097e-05	0	0	0	0	0	7.4098e-05	0	8.06837e-05	0	0	3.4076e-05
[truncated: 721 more rows]

## Sheet: Archaea
										Relative abundance
[truncated: 136 more rows]

[truncated: 1 more sheets: Fungi]
