# Supplementary material for: Compositional Shift of Bacterial, Archaeal, and Fungal Communities Is Dependent on Trophic Lifestyles in Rice Paddy Soil
Source: Front Microbiol. 2021 Sep 1;12:719486. doi: 10.3389/fmicb.2021.719486 (PMC8440912; doi:10.3389/fmicb.2021.719486)
Supplement: Supplementary file 1 [file Data_Sheet_1.zip › Table 8.XLSX]

## Sheet: Content
Supplementary Table 8. Profiles of OTUs sensitive to fertilization in the nutrient-poor and -rich environments
Sheet	Content
Summary	Summary on the number of differentially abundant OTUs (daOTUs) in each condition
Nutrient-poor_Bac	Bacterial daOTUs in nutrient-poor condition
Nutrient-poor_Arch	Archaeal daOTUs in nutrient-poor condition
Nutrient-poor_Fun	Fungal daOTUs in nutrient-poor condition
Nutrient-rich_Bac	Bacterial daOTUs in nutrient-rich condition
Nutrient-rich_Arch	Archaeal daOTUs in nutrient-rich condition
Nutrient-rich_Fun	Fungal daOTUs in nutrient-rich condition

## Sheet: Summary
Nutrient-poor	Bacteria			Archaea			Fungi
	number	prop. (total)	prop. (daOTUs)	number	prop. (total)	prop. (daOTUs)	number	prop. (total)	prop. (daOTUs)
Non-fer	1246	0.154879	0.474125	127	0.371345	0.824675	359	0.157318	0.518786
Oligotroph	225	0.0279677	0.180578	23	0.0672515	0.181102	111	0.0486415	0.309192
Copiotroph	95	0.0118086	0.076244	15	0.0438596	0.11811	52	0.022787	0.144847
Fer	1382	0.171784	0.525875	27	0.0789474	0.175325	333	0.145925	0.481214
Oligotroph	126	0.0156619	0.0911722	5	0.0146199	0.185185	24	0.0105171	0.0720721
Copiotroph	83	0.010317	0.0600579	5	0.0146199	0.185185	83	0.0363716	0.249249
Total daOTU	2628	0.326663		154	0.450292		692	0.303243
Total OTU	8045			342			2282
Nutrient-rich	Bacteria			Archaea			Fungi
	number	prop. (total)	prop. (daOTUs)	number	prop. (total)	prop. (daOTUs)	number	prop. (total)	prop. (daOTUs)
Non-fer	1315	0.165014	0.500381	85	0.328185	0.551948	571	0.216616	0.630243
Oligotroph	105	0.0131761	0.0798479	1	0.003861	0.0117647	45	0.0170713	0.0788091
Copiotroph	144	0.01807	0.109506	8	0.030888	0.0941176	70	0.0265554	0.122592
Fer	1230	0.154348	0.468037	120	0.46332	0.779221	335	0.127086	0.369757
Oligotroph	119	0.0149329	0.096748	13	0.0501931	0.108333	28	0.0106222	0.0835821
Copiotroph	117	0.0146819	0.095122	16	0.0617761	0.133333	123	0.0466616	0.367164
Total daOTU	2545	0.319363		205	0.791506		906	0.343703
Total OTU	7969			259			2636

## Sheet: Nutrient-poor_Bac
OTU	logFC	AveExpr	t	P.Value	adj.P.Val	B	Phylum	Class	Order	Family	Genus	OTU_id	category	Enriched in
1784a11b1268f875d6c1e1f8f51fb056	-20.5664	0.257411	-3.57953	0.000344949	0.00165481	-2.70127	Acidobacteria	Thermoanaerobaculia	Thermoanaerobaculales	Thermoanaerobaculaceae	Thermoanaerobaculum	B2520_Thermoanaerobaculum	Copio	Fer
1b35f7f0b8431ab5009d091f39d98de8	-68.7506	0.62442	-7.70027	1.41482e-14	3.49149e-13	0.269311	Acidobacteria	Subgroup 22	#N/A	#N/A	#N/A	B1313_o_NA	Copio	Fer
1bc10fc2b2f68e01c243198991c29232	-23.9526	0.317163	-3.93012	8.51643e-05	0.000459214	-2.44911	Acidobacteria	Thermoanaerobaculia	Thermoanaerobaculales	Thermoanaerobaculaceae	Subgroup 23	B2639_Subgroup 23	Copio	Fer
96098068b6f6f6674a64d38887e8fe48	-52.9341	0.12736	-5.02468	5.08223e-07	4.23694e-06	-3.07185	Acidobacteria	Thermoanaerobaculia	Thermoanaerobaculales	Thermoanaerobaculaceae	TPD-58	B4741_TPD-58	Copio	Fer
9bfffd34d3fc58a3176353c9ddc231d5	-63.3466	0.166036	-5.71086	1.13858e-08	1.22294e-07	-2.77972	Acidobacteria	Aminicenantia	Aminicenantales	#N/A	#N/A	B2847_o_Aminicenantales	Copio	Fer
AB364867.1.1454	-12.1926	0.814137	-3.69514	0.000220299	0.00109876	-0.984574	Acidobacteria	Aminicenantia	Aminicenantales	metagenome	metagenome	B443_metagenome	Copio	Fer
FJ466151.1.1395	-17.3405	2.21852	-6.98393	2.95202e-12	5.34888e-11	12.3696	Acidobacteria	Acidobacteriia	Subgroup 2	uncultured Holophaga sp.	uncultured Holophaga sp.	B309_uncultured Holophaga sp.	Copio	Fer
HM332313.1.1320	-11.9	0.929801	-3.35252	0.000802156	0.00358121	-1.86105	Acidobacteria	Acidobacteriia	Solibacterales	Solibacteraceae (Subgroup 3)	Bryobacter	B288_Bryobacter	Copio	Fer
JF185759.1.1370	-30.2571	1.47813	-11.2313	3.43716e-29	3.41382e-27	38.212	Acidobacteria	Subgroup 6	#N/A	#N/A	#N/A	B207_o_NA	Copio	Fer
JN038797.1.1517	-7.33612	0.210693	-2.51784	0.0118147	0.037853	-3.05388	Acidobacteria	Subgroup 22	uncultured Acidobacteriales bacterium	uncultured Acidobacteriales bacterium	uncultured Acidobacteriales bacterium	B1965_uncultured Acidobacteriales bacterium	Copio	Fer
JX505284.1.1474	-88.4454	0.203136	-3.3137	0.000922198	0.00405858	-4.48563	Acidobacteria	Subgroup 17	uncultured Geobacter sp.	uncultured Geobacter sp.	uncultured Geobacter sp.	B1963_uncultured Geobacter sp.	Copio	Fer
JX505425.1.1454	-67.643	0.651283	-11.2844	1.88691e-29	1.97145e-27	14.8369	Acidobacteria	Subgroup 18	#N/A	#N/A	#N/A	B359_o_NA	Copio	Fer
AB649008.1.1514	-11.225	1.47059	-3.25581	0.00113241	0.00486397	-1.98051	Actinobacteria	Actinobacteria	Micrococcales	Intrasporangiaceae	Oryzihumus	B106_Oryzihumus	Copio	Fer
EF125426.1.1479	-76.456	0.201331	-3.85092	0.000118006	0.000617669	-4.32578	Actinobacteria	Actinobacteria	Kineosporiales	Kineosporiaceae	#N/A	B87_f_Kineosporiaceae	Copio	Fer
JX133556.1.1470	-85.1982	0.195678	-3.19204	0.00141472	0.00596824	-4.49432	Actinobacteria	Actinobacteria	Frankiales	#N/A	#N/A	B204_o_Frankiales	Copio	Fer
522ad2d7b300951d5d80c303b58c8528	-41.5929	0.390687	-8.13017	4.5111e-16	1.35417e-14	7.70539	Bacteroidetes	Ignavibacteria	Ignavibacteriales	BSV40	unidentified eubacterium clone BSV40	B2559_unidentified eubacterium clone BSV40	Copio	Fer
EF562552.1.1348	-31.7937	0.0833333	-2.86628	0.00415719	0.0155919	-4.18354	Bacteroidetes	Bacteroidia	Bacteroidales	Paludibacteraceae	uncultured	B8399_uncultured	Copio	Fer
FPLK01002412.16.1516	-16.8747	0.391958	-2.73457	0.00625121	0.0221351	-3.66431	Bacteroidetes	Bacteroidia	Sphingobacteriales	Lentimicrobiaceae	uncultured soil bacterium	B685_uncultured soil bacterium	Copio	Fer
FQ659358.1.1356	-21.9618	2.01262	-6.69131	2.26498e-11	3.56591e-10	8.3287	Bacteroidetes	Bacteroidia	Bacteroidales	Bacteroidetes vadinHA17	#N/A	B245_f_Bacteroidetes vadinHA17	Copio	Fer
GQ088387.1.1344	-49.043	0.117998	-4.65532	3.25362e-06	2.34291e-05	-3.2971	Bacteroidetes	Bacteroidia	Cytophagales	Hymenobacteraceae	Hymenobacter	B4813_Hymenobacter	Copio	Fer
JX272000.1.1486	-31.3367	0.935238	-5.27107	1.36906e-07	1.25588e-06	-0.452678	Bacteroidetes	Bacteroidia	Bacteroidales	SB-5	#N/A	B1033_f_SB-5	Copio	Fer
5482972314f5f105d41709d9d85071b3	-10.085	0.248647	-2.49444	0.012623	0.0400759	-3.39746	BRC1	metagenome	metagenome	metagenome	metagenome	B5113_metagenome	Copio	Fer
1ee45b1b882b062181441ee1bea0cd17	-24.5323	1.94431	-6.94212	3.97005e-12	7.00417e-11	8.52607	Chloroflexi	Anaerolineae	RBG-13-54-9	#N/A	#N/A	B339_o_RBG-13-54-9	Copio	Fer
210a867bd2eb0d42a7cbde6b950f1546	-24.2119	1.01191	-5.1605	2.48427e-07	2.18426e-06	0.73633	Chloroflexi	Anaerolineae	Anaerolineales	Anaerolineaceae	uncultured	B676_uncultured	Copio	Fer
68fc9c4a2772d1d1083cb700191620c3	-50.2168	1.41961	-11.8482	2.75709e-32	3.6362e-30	28.1521	Chloroflexi	Anaerolineae	SJA-15	#N/A	#N/A	B407_o_SJA-15	Copio	Fer
778b0e24f65c9790390919a8bdabfceb	-19.5966	0.314996	-2.70713	0.00679207	0.0238612	-3.87123	Chloroflexi	Ktedonobacteria	Ktedonobacterales	Ktedonobacteraceae	HSB OF53-F07	B201_HSB OF53-F07	Copio	Fer
b4880428811fefca6e13a3e647679c9d	-13.556	1.26391	-2.86303	0.00420005	0.0157233	-3.15758	Chloroflexi	Anaerolineae	Anaerolineales	Anaerolineaceae	uncultured	B578_uncultured	Copio	Fer
ba0d4187668a4a7da37c3219692865eb	-32.4486	0.136303	-3.20517	0.00135174	0.00574167	-3.97406	Chloroflexi	Dehalococcoidia	GIF9	uncultured soil bacterium	uncultured soil bacterium	B4319_uncultured soil bacterium	Copio	Fer
c75c0bdd13f161c897007a2dd81d3249	-41.16	0.800182	-9.81056	1.12865e-22	6.30554e-21	17.9961	Chloroflexi	Anaerolineae	SBR1031	uncultured bacterium	uncultured bacterium	B1119_uncultured bacterium	Copio	Fer
cd562eac488ab90c7fbae9102f3aa35c	-53.3757	0.95469	-6.68196	2.41402e-11	3.77836e-10	-0.231426	Chloroflexi	Anaerolineae	Anaerolineales	Anaerolineaceae	uncultured	B282_uncultured	Copio	Fer
d156555dcf69122447846b6b0896d602	-61.5471	0.991831	-12.5516	5.17385e-36	1.09536e-33	26.6234	Chloroflexi	Anaerolineae	Anaerolineales	Anaerolineaceae	uncultured	B442_uncultured	Copio	Fer
d947b5f4c61ab52b1175e6ccefe5c183	-23.0775	0.960805	-8.06751	7.53827e-16	2.18149e-14	16.394	Chloroflexi	Anaerolineae	Anaerolineales	Anaerolineaceae	uncultured	B366_uncultured	Copio	Fer
de3e1254233574fd88e300f2b64853c7	-33.908	1.0616	-7.34845	2.07502e-13	4.33599e-12	6.70893	Chloroflexi	Anaerolineae	SBR1031	anaerobic bacterium MO-CFX2	anaerobic bacterium MO-CFX2	B1048_anaerobic bacterium MO-CFX2	Copio	Fer
f16a264d489cdcff68ca4e136a4ecd21	-98.3225	0.244649	-8.8101	1.34096e-18	5.4485e-17	-0.237597	Chloroflexi	Anaerolineae	Anaerolineales	Anaerolineaceae	Anaerolinea	B833_Anaerolinea	Copio	Fer
ff6bbf118c03a099016eca2291f9ec07	-8.60893	2.57964	-3.16316	0.00156281	0.00650766	-1.75077	Chloroflexi	Anaerolineae	SBR1031	#N/A	#N/A	B386_o_SBR1031	Copio	Fer
FQ659759.1.1321	-70.2369	0.161315	-2.63149	0.00850694	0.0287556	-4.53017	Chloroflexi	Anaerolineae	Anaerolineales	Anaerolineaceae	uncultured	B5491_uncultured	Copio	Fer
GU472730.1.1418	-54.8959	0.13208	-5.2109	1.8962e-07	1.69499e-06	-2.95177	Chloroflexi	Dehalococcoidia	vadinBA26	uncultured Caldilineaceae bacterium	uncultured Caldilineaceae bacterium	B5077_uncultured Caldilineaceae bacterium	Copio	Fer
HM440304.1.1418	-76.8094	1.0995	-15.129	1.89279e-51	1.08768e-48	38.9949	Chloroflexi	Anaerolineae	SJA-15	metagenome	metagenome	B189_metagenome	Copio	Fer
JX504968.1.1422	-60.2711	0.215966	-7.72226	1.19144e-14	2.97675e-13	1.49072	Chloroflexi	KD4-96	uncultured Longilinea sp.	uncultured Longilinea sp.	uncultured Longilinea sp.	B876_uncultured Longilinea sp.	Copio	Fer
FQ659370.1.1363	-31.3404	0.0779821	-2.80823	0.00498583	0.0180992	-4.20667	Cloacimonetes	Cloacimonadia	Cloacimonadales	PBS-18	uncultured soil bacterium	B4627_uncultured soil bacterium	Copio	Fer
0c77da80e68964e2918e3eb4f48b4ff2	-49.8618	0.708506	-10.0333	1.22344e-23	7.29082e-22	14.9435	Elusimicrobia	Endomicrobia	Endomicrobiales	Endomicrobiaceae	Candidatus Endomicrobium	B1699_Candidatus Endomicrobium	Copio	Fer
FQ659916.1.1346	-38.6997	0.562711	-9.97263	2.25133e-23	1.31246e-21	20.6596	Firmicutes	Clostridia	Clostridiales	Ruminococcaceae	uncultured	B1859_uncultured	Copio	Fer
AB486649.1.1358	-13.8125	2.5589	-5.46574	4.65995e-08	4.6226e-07	5.45367	Gemmatimonadetes	Gemmatimonadetes	Gemmatimonadales	Gemmatimonadaceae	Gemmatimonas	B86_Gemmatimonas	Copio	Fer
EU979110.1.1476	-54.4359	0.491259	-7.17962	7.21268e-13	1.4084e-11	0.893662	Gemmatimonadetes	Gemmatimonadetes	Gemmatimonadales	Gemmatimonadaceae	uncultured	B196_uncultured	Copio	Fer
HQ114125.1.1472	-45.9852	0.610355	-7.96481	1.73445e-15	4.79507e-14	5.49603	Gemmatimonadetes	Gemmatimonadetes	Gemmatimonadales	Gemmatimonadaceae	uncultured	B690_uncultured	Copio	Fer
785950324d328595c841dfc79e39e895	-49.3066	0.596174	-10.7908	4.44616e-27	3.88797e-25	20.3799	Latescibacteria	uncultured soil bacterium PBS-III-30	uncultured soil bacterium PBS-III-30	uncultured soil bacterium PBS-III-30	uncultured soil bacterium PBS-III-30	B1958_uncultured soil bacterium PBS-III-30	Copio	Fer
a8d1f251a0fb73b7513f94b9517be954	-57.2617	0.14248	-5.13088	2.90833e-07	2.52129e-06	-3.15709	Latescibacteria	uncultured soil bacterium PBS-III-30	uncultured soil bacterium PBS-III-30	uncultured soil bacterium PBS-III-30	uncultured soil bacterium PBS-III-30	B6379_uncultured soil bacterium PBS-III-30	Copio	Fer
DQ138960.1.1519	-34.4924	0.477317	-5.86589	4.53106e-09	5.11254e-08	0.657391	Nitrospirae	4-29-1	#N/A	#N/A	#N/A	B357_o_NA	Copio	Fer
DQ138961.1.1482	-13.3812	1.05025	-5.03035	4.93427e-07	4.13071e-06	3.58639	Nitrospirae	Thermodesulfovibrionia	uncultured	uncultured prokaryote	uncultured prokaryote	B305_uncultured prokaryote	Copio	Fer
DQ450806.1.1322	-95.9642	0.842153	-14.685	1.36513e-48	6.86404e-46	24.6339	Nitrospirae	Thermodesulfovibrionia	uncultured	uncultured prokaryote	uncultured prokaryote	B48_uncultured prokaryote	Copio	Fer
f6123be6ef84a78574b4bf3d63584d17	-8.00415	0.68504	-2.47597	0.0132949	0.0418784	-3.20527	Omnitrophicaeota	uncultured bacterium	uncultured bacterium	uncultured bacterium	uncultured bacterium	B1552_uncultured bacterium	Copio	Fer
KP749219.1.1510	-31.3404	0.0779821	-2.80823	0.00498583	0.0180992	-4.20667	Omnitrophicaeota	uncultured bacterium	uncultured bacterium	uncultured bacterium	uncultured bacterium	B8120_uncultured bacterium	Copio	Fer
b9cf7bf883ca71a1e28348f107753f21	-14.3358	0.598794	-4.94036	7.85505e-07	6.28795e-06	2.86821	Patescibacteria	Microgenomatia	Candidatus Woesebacteria	groundwater metagenome	groundwater metagenome	B3303_groundwater metagenome	Copio	Fer
443bb1d252f9a9492309b6c7cc7f8bb7	-37.8306	0.712209	-7.0549	1.77839e-12	3.29658e-11	4.08052	Planctomycetes	Phycisphaerae	MSBL9	SG8-4	#N/A	B1251_f_SG8-4	Copio	Fer
6424fffb9a4da77579f0297b9e3101f7	-26.818	0.0960953	-3.43606	0.00059133	0.00270298	-3.48374	Planctomycetes	Phycisphaerae	mle1-8	uncultured delta proteobacterium	uncultured delta proteobacterium	B2429_uncultured delta proteobacterium	Copio	Fer
70087c25c1ea97b4aaf8099276cb14a9	-17.9896	0.728414	-4.77376	1.81982e-06	1.37211e-05	1.06413	Planctomycetes	Phycisphaerae	Phycisphaerales	AKAU3564 sediment group	uncultured organism	B1849_uncultured organism	Copio	Fer
729384f791aa26826bfa81b2cd32f2fe	-49.0344	0.122009	-4.39369	1.11964e-05	7.26413e-05	-3.55675	Planctomycetes	Planctomycetacia	Gemmatales	Gemmataceae	uncultured	B11591_uncultured	Copio	Fer
04836cb2cc46fb877abde5488604fdd6	-66.2089	0.164743	-5.93259	3.02655e-09	3.49836e-08	-2.65224	Proteobacteria	Deltaproteobacteria	Syntrophobacterales	Syntrophobacteraceae	Syntrophobacter	B258_Syntrophobacter	Copio	Fer
748ec1339ec664aca78c793b06d940b9	-30.9137	0.560444	-3.28147	0.00103428	0.0044856	-3.85561	Proteobacteria	Gammaproteobacteria	HOC36	uncultured soil bacterium	uncultured soil bacterium	B225_uncultured soil bacterium	Copio	Fer
AB672140.1.1478	-74.8748	0.197168	-3.77128	0.000162835	0.000832281	-4.33762	Proteobacteria	Deltaproteobacteria	Myxococcales	Polyangiaceae	Pajaroellobacter	B2121_Pajaroellobacter	Copio	Fer
AB672241.1.1469	-67.8496	0.467534	-9.19943	3.90994e-20	1.77714e-18	4.89341	Proteobacteria	Gammaproteobacteria	Xanthomonadales	Xanthomonadaceae	uncultured	B306_uncultured	Copio	Fer
AB748619.1.1460	-90.3319	0.236766	-8.14364	4.03766e-16	1.22116e-14	-0.840416	Proteobacteria	Gammaproteobacteria	Betaproteobacteriales	Gallionellaceae	#N/A	B1174_f_Gallionellaceae	Copio	Fer
AB748641.1.1460	-10.2984	3.16327	-4.56443	5.03571e-06	3.47447e-05	2.59683	Proteobacteria	Gammaproteobacteria	Betaproteobacteriales	Gallionellaceae	Sideroxydans	B5_Sideroxydans	Copio	Fer
ced8fcc7d2fb267c3a5c65a15f116e7a	-16.647	0.166667	-2.65939	0.00783387	0.0268986	-3.74105	Proteobacteria	Gammaproteobacteria	#N/A	#N/A	#N/A	B11416_o_NA	Copio	Fer
EF516394.1.1456	-22.6238	1.01634	-4.29961	1.71835e-05	0.000107497	-1.43787	Proteobacteria	Gammaproteobacteria	Betaproteobacteriales	SC-I-84	#N/A	B121_f_SC-I-84	Copio	Fer
EU937916.1.1436	-24.9348	1.02471	-6.80115	1.06446e-11	1.76569e-10	7.58168	Proteobacteria	Gammaproteobacteria	Betaproteobacteriales	Methylophilaceae	Methylotenera	B895_Methylotenera	Copio	Fer
FPLP01002637.3.1464	-7.17131	1.8594	-2.49126	0.0127364	0.0403881	-3.08837	Proteobacteria	Gammaproteobacteria	Betaproteobacteriales	SC-I-84	#N/A	B79_f_SC-I-84	Copio	Fer
FR687416.1.1486	-62.86	0.588263	-10.141	4.10348e-24	2.641e-22	10.3482	Proteobacteria	Gammaproteobacteria	Betaproteobacteriales	SC-I-84	uncultured organism	B119_uncultured organism	Copio	Fer
GQ264175.1.1407	-17.492	0.524145	-5.98176	2.24145e-09	2.63632e-08	6.53699	Proteobacteria	Alphaproteobacteria	Caulobacterales	Caulobacteraceae	uncultured	B1585_uncultured	Copio	Fer
HE974849.1.1525	-29.813	0.860001	-6.42309	1.36264e-10	1.90983e-09	3.91818	Proteobacteria	Deltaproteobacteria	Syntrophobacterales	Syntrophaceae	uncultured	B66_uncultured	Copio	Fer
HM341106.1.1371	-67.8068	0.664381	-12.7004	7.92213e-37	1.93132e-34	24.1771	Proteobacteria	Deltaproteobacteria	Myxococcales	Haliangiaceae	Haliangium	B190_Haliangium	Copio	Fer
HQ121088.1.1458	-31.3297	0.84743	-6.28045	3.43911e-10	4.54313e-09	2.87476	Proteobacteria	Alphaproteobacteria	Sphingomonadales	Sphingomonadaceae	Sphingomonas	B228_Sphingomonas	Copio	Fer
JX505341.1.1457	-17.8684	0.582848	-6.10275	1.05998e-09	1.30191e-08	7.00351	Proteobacteria	Gammaproteobacteria	Methylococcales	Methylomonaceae	Methylobacter	B474_Methylobacter	Copio	Fer
KC541523.1.1526	-100.039	0.229763	-3.74806	0.000178663	0.000908562	-4.45194	Proteobacteria	Gammaproteobacteria	Betaproteobacteriales	Burkholderiaceae	Janthinobacterium	B1715_Janthinobacterium	Copio	Fer
a583020e5fa819e6b8d2f7df48ddf218	-41.0553	0.318318	-3.53007	0.000416298	0.00196557	-3.99195	Spirochaetes	Spirochaetia	Spirochaetales	Spirochaetaceae	Spirochaeta 2	B2584_Spirochaeta 2	Copio	Fer
f162e0701b11badda070151100b4ffd8	-7.76751	0.778266	-2.72104	0.00651284	0.0229798	-2.68549	TA06	uncultured bacterium	uncultured bacterium	uncultured bacterium	uncultured bacterium	B1182_uncultured bacterium	Copio	Fer
6fcbf179bc34d4e9c7dfb13915b406dc	-13.5309	0.445964	-3.6723	0.000240944	0.00119139	-1.33669	Verrucomicrobia	Verrucomicrobiae	Chthoniobacterales	Chthoniobacteraceae	uncultured Verrucomicrobia bacterium	B3159_uncultured Verrucomicrobia bacterium	Copio	Fer
a8f906f3038430dbb31240eca5479ef0	-31.7937	0.0833333	-2.86628	0.00415719	0.0155919	-4.18354	Verrucomicrobia	Verrucomicrobiae	#N/A	#N/A	#N/A	B12369_o_NA	Copio	Fer
AB930500.1.1491	-19.2815	0.496536	-3.29554	0.000983893	0.00429719	-3.0572	Verrucomicrobia	Verrucomicrobiae	Pedosphaerales	Pedosphaeraceae	ADurb.Bin063-1	B82_ADurb.Bin063-1	Copio	Fer
DQ404689.1.1545	-31.0734	0.195678	-2.41765	0.0156294	0.0481019	-4.38328	Verrucomicrobia	Verrucomicrobiae	Chthoniobacterales	Chthoniobacteraceae	Candidatus Udaeobacter	B861_Candidatus Udaeobacter	Copio	Fer
e75fd8be58d1d4089a5488a054170051	-46.5517	0.115831	-4.17123	3.04126e-05	0.000180036	-3.6652	Verrucomicrobia	Verrucomicrobiae	Pedosphaerales	Pedosphaeraceae	uncultured prokaryote	B3355_uncultured prokaryote	Copio	Fer
151d5e81e49602aca78f11e03f3fff08	-17.0965	0.45934	-3.68767	0.000226861	0.00112869	-1.97174	#N/A	#N/A	#N/A	#N/A	#N/A	B2814_o_NA	Copio	Fer
7b3dd7dc21df94a10ac388967d3fd195	-27.727	0.482241	-5.86242	4.62668e-09	5.21312e-08	2.30084	#N/A	#N/A	#N/A	#N/A	#N/A	B2465_o_NA	Copio	Fer
1b1bd5cadf1a3c0689f6b911c338ddc7	-65.7058	0.43859	-4.30921	1.64552e-05	0.000103343	-4.03058	Acidobacteria	Acidobacteriia	Solibacterales	Solibacteraceae (Subgroup 3)	AKIW659	B1984_AKIW659	Not_predicted	Fer
2387e4e55f6b3753ee027bab1e7198e3	-94.5218	0.422698	-4.69903	2.62983e-06	1.92512e-05	-4.19454	Acidobacteria	Subgroup 6	#N/A	#N/A	#N/A	B1347_o_NA	Not_predicted	Fer
29a6181f32d9f7f361aac1bc2df20d3f	-66.9992	0.175609	-6.04014	1.56449e-09	1.86741e-08	-2.55708	Acidobacteria	Acidobacteriia	Solibacterales	Solibacteraceae (Subgroup 3)	#N/A	B8710_f_Solibacteraceae (Subgroup 3)	Not_predicted	Fer
3d03acc67b299d4e4a798089abc208d9	-52.2546	0.275191	-6.82723	8.8824e-12	1.49809e-10	0.28388	Acidobacteria	Subgroup 25	uncultured Acidobacteria bacterium	uncultured Acidobacteria bacterium	uncultured Acidobacteria bacterium	B1678_uncultured Acidobacteria bacterium	Not_predicted	Fer
4b6f8178a1c284b06c91bf7a5a64a2da	-43.0511	0.39423	-6.75842	1.42989e-11	2.33336e-10	1.69734	Acidobacteria	Acidobacteriia	Solibacterales	Solibacteraceae (Subgroup 3)	#N/A	B5500_f_Solibacteraceae (Subgroup 3)	Not_predicted	Fer
4c51f5d4bcdce2368ce52cf512b31573	-72.6333	0.278591	-8.782	1.72092e-18	6.8201e-17	2.60967	Acidobacteria	Aminicenantia	Aminicenantales	#N/A	#N/A	B4067_o_Aminicenantales	Not_predicted	Fer
509835418eb362bb8bfcd517c652c4f8	-16.276	0.850758	-2.70602	0.00681468	0.0239198	-3.6555	Acidobacteria	Acidobacteriia	Solibacterales	Solibacteraceae (Subgroup 3)	Paludibaculum	B2425_Paludibaculum	Not_predicted	Fer
51cd787f1f940e38bead4d2d53b19a07	-64.3794	0.215228	-3.93888	8.2114e-05	0.000445453	-4.18585	Acidobacteria	Subgroup 18	#N/A	#N/A	#N/A	B4570_o_NA	Not_predicted	Fer
5f7edd1db8f5c67c866bd893ed19ce75	-58.0458	0.350409	-5.74596	9.26059e-09	1.00814e-07	-2.43053	Acidobacteria	Subgroup 18	#N/A	#N/A	#N/A	B1785_o_NA	Not_predicted	Fer
67cbee5d21da6e71fc49c3d1ab8c3c2c	-31.5387	0.151651	-4.96261	7.00692e-07	5.68826e-06	-1.26805	Acidobacteria	Aminicenantia	Aminicenantales	uncultured prokaryote	uncultured prokaryote	B4836_uncultured prokaryote	Not_predicted	Fer
7237c43b05efd810e51438cfa3305fec	-10.633	0.535297	-2.64404	0.00819804	0.0278535	-3.20064	Acidobacteria	Subgroup 25	uncultured Acidobacteria bacterium	uncultured Acidobacteria bacterium	uncultured Acidobacteria bacterium	B2103_uncultured Acidobacteria bacterium	Not_predicted	Fer
74ba32af7c2aae95f23a8052bf129fcc	-87.2955	0.323491	-4.66063	3.17083e-06	2.294e-05	-4.1437	Acidobacteria	Subgroup 18	#N/A	#N/A	#N/A	B3731_o_NA	Not_predicted	Fer
769f8d09e65e0917fd601bc584ef1e33	-29.4784	0.214285	-5.08286	3.74832e-07	3.1978e-06	-0.625599	Acidobacteria	Thermoanaerobaculia	Thermoanaerobaculales	Thermoanaerobaculaceae	TPD-58	B10015_TPD-58	Not_predicted	Fer
78a01b5f8418fd43ae5ccc6d7b4ee928	-31.7129	0.388258	-4.73914	2.15966e-06	1.61173e-05	-1.79166	Acidobacteria	Thermoanaerobaculia	Thermoanaerobaculales	Thermoanaerobaculaceae	Thermoanaerobaculum	B2514_Thermoanaerobaculum	Not_predicted	Fer
83914322989432864cf435285bf23cc5	-59.6876	0.143609	-5.66574	1.48218e-08	1.5669e-07	-2.64009	Acidobacteria	Subgroup 18	#N/A	#N/A	#N/A	B12642_o_NA	Not_predicted	Fer
8f1d309956fdd5f740b1176e96d0d4b7	-48.2531	0.161315	-2.95224	0.00315815	0.0123217	-4.37795	Acidobacteria	Aminicenantia	Aminicenantales	#N/A	#N/A	B2099_o_Aminicenantales	Not_predicted	Fer
923c6a4390b4181ceaf95316a36f75c0	-45.0194	0.161315	-5.76812	8.12338e-09	8.90362e-08	-1.25119	Acidobacteria	Aminicenantia	Aminicenantales	uncultured prokaryote	uncultured prokaryote	B10458_uncultured prokaryote	Not_predicted	Fer
AB128876.1.1513	-86.6502	0.228176	-4.36438	1.28063e-05	8.20931e-05	-4.24351	Acidobacteria	Holophagae	Subgroup 7	uncultured Desulfuromonadales bacterium	uncultured Desulfuromonadales bacterium	B616_uncultured Desulfuromonadales bacterium	Not_predicted	Fer
AB672138.1.1458	-54.7287	0.365412	-5.02075	5.18719e-07	4.31997e-06	-3.1625	Acidobacteria	Subgroup 18	#N/A	#N/A	#N/A	B2137_o_NA	Not_predicted	Fer
AF523989.1.1218	-94.5528	0.227495	-8.97526	3.04792e-19	1.29738e-17	0.412592	Acidobacteria	Acidobacteriia	Solibacterales	Solibacteraceae (Subgroup 3)	Candidatus Solibacter	B4042_Candidatus Solibacter	Not_predicted	Fer
AJ519665.1.1295	-13.3318	2.16496	-5.60802	2.07107e-08	2.14515e-07	6.35374	Acidobacteria	Holophagae	Holophagales	Holophagaceae	#N/A	B487_f_Holophagaceae	Not_predicted	Fer
b4497e84e87603d1442ddaf1763c247d	-54.7142	0.182916	-3.34754	0.000816683	0.00363598	-4.30759	Acidobacteria	Subgroup 18	#N/A	#N/A	#N/A	B7925_o_NA	Not_predicted	Fer
b998a0b48d8559c77e62d9daa832bf96	-31.7535	0.23784	-3.19016	0.00142391	0.00600385	-3.96245	Acidobacteria	#N/A	#N/A	#N/A	#N/A	B8667_o_NA	Not_predicted	Fer
c164669a6f15b4eccaf46323fd180b86	-61.3093	0.152551	-5.49357	3.98256e-08	3.99997e-07	-2.93777	Acidobacteria	Subgroup 17	#N/A	#N/A	#N/A	B5971_o_NA	Not_predicted	Fer
c34506784d6d4d6575a1be764fa8e1b6	-38.0847	0.286532	-3.4775	0.000507097	0.00236088	-3.94607	Acidobacteria	Acidobacteriia	Acidobacteriales	uncultured	uncultured bacterium DA038	B429_uncultured bacterium DA038	Not_predicted	Fer
c4ee01ecae5853365c301073f95e5244	-41.771	0.504029	-5.75755	8.6476e-09	9.4653e-08	-0.863971	Acidobacteria	Subgroup 18	#N/A	#N/A	#N/A	B2001_o_NA	Not_predicted	Fer
dd142a1af5c488ad575391412f230cb3	-79.3266	0.532942	-3.63387	0.000279841	0.00136444	-4.39715	Acidobacteria	Acidobacteriia	Solibacterales	Solibacteraceae (Subgroup 3)	Bryobacter	B3703_Bryobacter	Not_predicted	Fer
DQ017940.1.1505	-55.0773	0.676713	-9.44531	3.88569e-21	1.90612e-19	9.4855	Acidobacteria	Subgroup 17	#N/A	#N/A	#N/A	B559_o_NA	Not_predicted	Fer
DQ297981.1.1464	-45.6463	0.392867	-5.93889	2.91263e-09	3.38126e-08	-0.956519	Acidobacteria	Holophagae	Subgroup 7	uncultured bacterium gp7	uncultured bacterium gp7	B3979_uncultured bacterium gp7	Not_predicted	Fer
DQ404598.1.1496	-124.031	0.437911	-7.32943	2.3911e-13	4.98353e-12	-3.20097	Acidobacteria	Acidobacteriia	Acidobacteriales	Koribacteraceae	Candidatus Koribacter	B1690_Candidatus Koribacter	Not_predicted	Fer
DQ404617.1.1479	-82.069	0.197459	-7.79026	6.98169e-15	1.7945e-13	-0.839055	Acidobacteria	Acidobacteriia	Solibacterales	Solibacteraceae (Subgroup 3)	#N/A	B6445_f_Solibacteraceae (Subgroup 3)	Not_predicted	Fer
DQ520185.1.1489	-38.8546	1.31388	-8.16036	3.51759e-16	1.06789e-14	8.91398	Acidobacteria	Subgroup 17	uncultured prokaryote	uncultured prokaryote	uncultured prokaryote	B401_uncultured prokaryote	Not_predicted	Fer
DQ660831.1.1358	-25.7249	1.44715	-9.70073	3.31631e-22	1.79058e-20	27.4976	Acidobacteria	Holophagae	Holophagales	Holophagaceae	Geothrix	B522_Geothrix	Not_predicted	Fer
DQ829644.1.1514	-74.663	0.249607	-4.56806	4.94936e-06	3.4237e-05	-4.03462	Acidobacteria	Subgroup 6	#N/A	#N/A	#N/A	B807_o_NA	Not_predicted	Fer
e0f2e2e1ec9213b482013bae44bb642d	-72.7781	0.175105	-6.90834	5.03731e-12	8.73891e-11	-1.65574	Acidobacteria	Subgroup 6	#N/A	#N/A	#N/A	B8793_o_NA	Not_predicted	Fer
e4f86faf9694b3b6034e6097127c34a6	-58.5625	0.531598	-9.8883	5.22555e-23	2.98153e-21	10.5323	Acidobacteria	Acidobacteriia	Solibacterales	Solibacteraceae (Subgroup 3)	GOUTB8	B946_GOUTB8	Not_predicted	Fer
EF019087.1.1378	-14.186	1.33451	-2.66714	0.00765558	0.0263878	-3.53432	Acidobacteria	Subgroup 6	#N/A	#N/A	#N/A	B621_o_NA	Not_predicted	Fer
EF019667.1.1348	-20.0836	1.52024	-7.98537	1.46916e-15	4.08975e-14	17.6239	Acidobacteria	Acidobacteriia	Solibacterales	Solibacteraceae (Subgroup 3)	Candidatus Solibacter	B416_Candidatus Solibacter	Not_predicted	Fer
EF020206.1.1401	-51.067	0.287495	-4.56827	4.94431e-06	3.42315e-05	-3.47098	Acidobacteria	Blastocatellia (Subgroup 4)	11-24	#N/A	#N/A	B2385_o_11-24	Not_predicted	Fer
EF516561.1.1477	-18.181	0.901008	-4.35603	1.33041e-05	8.49453e-05	-0.378721	Acidobacteria	Subgroup 6	#N/A	#N/A	#N/A	B428_o_NA	Not_predicted	Fer
EF590013.1.1401	-84.5244	0.19413	-3.16679	0.00154341	0.00643352	-4.49608	Acidobacteria	Holophagae	Subgroup 7	Acidobacteria bacterium enrichment culture clone CV-04	Acidobacteria bacterium enrichment culture clone CV-04	B6748_Acidobacteria bacterium enrichment culture clone CV-04	Not_predicted	Fer
EF688205.1.1474	-73.6522	0.246227	-4.50621	6.6335e-06	4.49213e-05	-4.05048	Acidobacteria	Acidobacteriia	Solibacterales	Solibacteraceae (Subgroup 3)	Candidatus Solibacter	B1159_Candidatus Solibacter	Not_predicted	Fer
EU132102.1.1326	-19.0889	0.579621	-3.88738	0.000101629	0.000538253	-1.83576	Acidobacteria	Holophagae	Subgroup 7	uncultured Desulfovirga sp.	uncultured Desulfovirga sp.	B1578_uncultured Desulfovirga sp.	Not_predicted	Fer
EU276508.1.1484	-11.5159	0.454593	-2.82389	0.00474871	0.0173971	-2.97704	Acidobacteria	Subgroup 17	uncultured prokaryote	uncultured prokaryote	uncultured prokaryote	B639_uncultured prokaryote	Not_predicted	Fer
EU589292.1.1522	-105.192	0.482702	-6.22549	4.88741e-10	6.37264e-09	-3.59405	Acidobacteria	Subgroup 6	uncultured Holophaga sp.	uncultured Holophaga sp.	uncultured Holophaga sp.	B501_uncultured Holophaga sp.	Not_predicted	Fer
EU589299.1.1505	-32.7578	0.206285	-2.5487	0.0108191	0.0351819	-4.35454	Acidobacteria	Holophagae	Subgroup 7	uncultured Desulfuromonadales bacterium	uncultured Desulfuromonadales bacterium	B5642_uncultured Desulfuromonadales bacterium	Not_predicted	Fer
FJ375497.1.1445	-7.18643	0.327385	-2.44387	0.0145383	0.045211	-3.18027	Acidobacteria	Holophagae	Subgroup 7	#N/A	#N/A	B2769_o_Subgroup 7	Not_predicted	Fer
FJ485444.1.1355	-64.2653	0.230278	-8.23401	1.91017e-16	5.9795e-15	2.34003	Acidobacteria	Subgroup 18	uncultured prokaryote	uncultured prokaryote	uncultured prokaryote	B2810_uncultured prokaryote	Not_predicted	Fer
FJ889227.1.1456	-81.8741	0.215599	-4.12382	3.74007e-05	0.000217248	-4.28334	Acidobacteria	Acidobacteriia	Acidobacteriales	Koribacteraceae	Candidatus Koribacter	B1176_Candidatus Koribacter	Not_predicted	Fer
FPLS01002185.10.1542	-105.159	0.253015	-9.98207	2.04802e-23	1.20265e-21	1.61505	Acidobacteria	Subgroup 6	#N/A	#N/A	#N/A	B1305_o_NA	Not_predicted	Fer
FQ659752.1.1370	-47.4095	1.36854	-10.7937	4.30929e-27	3.85202e-25	21.5117	Acidobacteria	Subgroup 17	uncultured prokaryote	uncultured prokaryote	uncultured prokaryote	B108_uncultured prokaryote	Not_predicted	Fer
GQ340229.1.1410	-10.4788	0.718397	-4.187	2.83764e-05	0.000169731	1.07021	Acidobacteria	Subgroup 6	Acidobacteria bacterium SCN 69-37	Acidobacteria bacterium SCN 69-37	Acidobacteria bacterium SCN 69-37	B1688_Acidobacteria bacterium SCN 69-37	Not_predicted	Fer
GU208375.1.1466	-47.1904	0.113541	-4.47947	7.5206e-06	5.01269e-05	-3.39831	Acidobacteria	Thermoanaerobaculia	Thermoanaerobaculales	Thermoanaerobaculaceae	Subgroup 23	B5401_Subgroup 23	Not_predicted	Fer
HE804607.1.1423	-59.5821	0.645527	-15.3281	9.30055e-53	5.75561e-50	55.4622	Acidobacteria	Acidobacteriia	Solibacterales	Solibacteraceae (Subgroup 3)	Bryobacter	B337_Bryobacter	Not_predicted	Fer
HM062052.1.1418	-73.7214	0.19413	-3.71318	0.000205172	0.00102906	-4.3461	Acidobacteria	Acidobacteriia	Acidobacteriales	uncultured	#N/A	B3235_f_uncultured	Not_predicted	Fer
HM062118.1.1478	-51.1851	0.12736	-4.58639	4.53452e-06	3.17219e-05	-3.45825	Acidobacteria	Blastocatellia (Subgroup 4)	Pyrinomonadales	Pyrinomonadaceae	RB41	B14760_RB41	Not_predicted	Fer
HM062175.1.1405	-72.827	0.18121	-6.5256	6.92044e-11	1.01597e-09	-2.23173	Acidobacteria	Acidobacteriia	Solibacterales	Solibacteraceae (Subgroup 3)	Bryobacter	B8110_Bryobacter	Not_predicted	Fer
HM062357.1.1438	-25.8787	0.390217	-3.68778	0.000226766	0.00112869	-3.06825	Acidobacteria	Acidobacteriia	Acidobacteriales	uncultured	#N/A	B496_f_uncultured	Not_predicted	Fer
HM268815.1.1377	-14.1487	0.81748	-3.50914	0.000450452	0.00211182	-1.88371	Acidobacteria	Holophagae	Subgroup 7	uncultured proteobacterium	uncultured proteobacterium	B620_uncultured proteobacterium	Not_predicted	Fer
HM445244.1.1378	-12.1542	0.409103	-4.14466	3.41591e-05	0.000200299	0.465872	Acidobacteria	Thermoanaerobaculia	Thermoanaerobaculales	Thermoanaerobaculaceae	Subgroup 10	B2852_Subgroup 10	Not_predicted	Fer
HQ330534.1.1369	-6.1393	2.91414	-2.84668	0.00442181	0.0164388	-2.20121	Acidobacteria	Subgroup 21	uncultured soil bacterium	uncultured soil bacterium	uncultured soil bacterium	B335_uncultured soil bacterium	Not_predicted	Fer
HQ598464.1.1454	-16.4936	1.263	-5.88905	3.94064e-09	4.47775e-08	6.48489	Acidobacteria	Acidobacteriia	Acidobacteriales	Acidobacteriaceae (Subgroup 1)	#N/A	B490_f_Acidobacteriaceae (Subgroup 1)	Not_predicted	Fer
HQ599067.1.1456	-53.3399	0.318658	-4.82267	1.42596e-06	1.09883e-05	-3.31149	Acidobacteria	Acidobacteriia	Acidobacteriales	Acidobacteriaceae (Subgroup 1)	Occallatibacter	B2893_Occallatibacter	Not_predicted	Fer
HQ697380.1.1521	-43.3185	0.113541	-3.90527	9.43999e-05	0.000501948	-3.77873	Acidobacteria	Subgroup 17	metagenome	metagenome	metagenome	B4541_metagenome	Not_predicted	Fer
HQ729902.1.1453	-87.6544	0.218104	-7.8542	4.20651e-15	1.10593e-13	-1.14429	Acidobacteria	Acidobacteriia	Solibacterales	Solibacteraceae (Subgroup 3)	Candidatus Solibacter	B4679_Candidatus Solibacter	Not_predicted	Fer
JF118014.1.1373	-63.102	0.165394	-5.6888	1.29558e-08	1.38419e-07	-2.79419	Acidobacteria	Subgroup 6	uncultured bacterium mle1-25	uncultured bacterium mle1-25	uncultured bacterium mle1-25	B4051_uncultured bacterium mle1-25	Not_predicted	Fer
JF222426.1.1375	-97.7053	0.394282	-12.1349	8.84421e-34	1.48233e-31	9.86934	Acidobacteria	Thermoanaerobaculia	Thermoanaerobaculales	Thermoanaerobaculaceae	Subgroup 10	B1007_Subgroup 10	Not_predicted	Fer
JF429020.1.1473	-11.9501	0.562097	-4.37611	1.2137e-05	7.7989e-05	1.36309	Acidobacteria	Acidobacteriia	Acidobacteriales	Koribacteraceae	Candidatus Koribacter	B276_Candidatus Koribacter	Not_predicted	Fer
JN023998.1.1505	-35.651	0.224504	-2.7738	0.00554517	0.0199245	-4.30164	Acidobacteria	Subgroup 6	#N/A	#N/A	#N/A	B76_o_NA	Not_predicted	Fer
JN038765.1.1512	-81.5909	0.214853	-4.10956	3.97851e-05	0.000230102	-4.28563	Acidobacteria	Subgroup 6	Unknown Order	Unknown Family	Vicinamibacter	B1155_Vicinamibacter	Not_predicted	Fer
JN038879.1.1511	-43.0413	1.17779	-9.08474	1.12498e-19	4.89213e-18	12.3093	Acidobacteria	Acidobacteriia	Subgroup 13	uncultured Acidobacteria bacterium	uncultured Acidobacteria bacterium	B774_uncultured Acidobacteria bacterium	Not_predicted	Fer
JN038973.1.1492	-97.0263	0.222844	-3.63519	0.000278412	0.00135912	-4.46109	Acidobacteria	Subgroup 18	#N/A	#N/A	#N/A	B1238_o_NA	Not_predicted	Fer
JN039016.1.1494	-17.8811	0.827071	-6.62898	3.45833e-11	5.27936e-10	9.92684	Acidobacteria	Subgroup 18	#N/A	#N/A	#N/A	B1037_o_NA	Not_predicted	Fer
JN417559.1.1492	-67.9261	0.178039	-6.12371	9.29717e-10	1.15604e-08	-2.4986	Acidobacteria	Acidobacteriia	Solibacterales	Solibacteraceae (Subgroup 3)	Bryobacter	B8468_Bryobacter	Not_predicted	Fer
JN540185.1.1476	-24.121	0.497741	-3.74472	0.000181051	0.000918636	-2.80686	Acidobacteria	Subgroup 6	#N/A	#N/A	#N/A	B336_o_NA	Not_predicted	Fer
JQ072363.1.1355	-57.4429	0.752289	-11.6925	1.7261e-31	2.2042e-29	22.4008	Acidobacteria	Acidobacteriia	Solibacterales	Solibacteraceae (Subgroup 3)	GOUTB8	B988_GOUTB8	Not_predicted	Fer
JX079319.1.1480	-44.1967	0.437466	-7.38624	1.56413e-13	3.32894e-12	3.64523	Acidobacteria	Acidobacteriia	Solibacterales	Solibacteraceae (Subgroup 3)	Bryobacter	B2805_Bryobacter	Not_predicted	Fer
JX223469.1.1405	-29.5151	0.10576	-3.78163	0.000156215	0.000799967	-3.22431	Acidobacteria	Holophagae	Holophagales	Holophagaceae	#N/A	B17363_f_Holophagaceae	Not_predicted	Fer
JX505296.1.1427	-39.8972	0.335393	-4.59664	4.31734e-06	3.03876e-05	-2.84074	Acidobacteria	Acidobacteriia	Acidobacteriales	Koribacteraceae	Candidatus Koribacter	B2261_Candidatus Koribacter	Not_predicted	Fer
JX505320.1.1487	-16.5488	0.460798	-5.66382	1.49884e-08	1.58244e-07	5.33588	Acidobacteria	Thermoanaerobaculia	Thermoanaerobaculales	Thermoanaerobaculaceae	TPD-58	B2617_TPD-58	Not_predicted	Fer
JX505382.1.1476	-57.1876	0.191185	-3.49887	0.000468155	0.00219099	-4.27832	Acidobacteria	Subgroup 6	#N/A	#N/A	#N/A	B1978_o_NA	Not_predicted	Fer
KC541007.1.1550	-21.5179	0.323839	-2.71331	0.00666672	0.0234618	-3.96192	Acidobacteria	Thermoanaerobaculia	Thermoanaerobaculales	Thermoanaerobaculaceae	Subgroup 10	B4026_Subgroup 10	Not_predicted	Fer
KC541181.1.1494	-38.5306	0.361101	-6.13313	8.76372e-10	1.09649e-08	0.65984	Acidobacteria	Acidobacteriia	Solibacterales	Solibacteraceae (Subgroup 3)	Bryobacter	B4011_Bryobacter	Not_predicted	Fer
KM205462.1.1429	-55.3071	0.137617	-4.95574	7.25894e-07	5.86916e-06	-3.25765	Acidobacteria	Acidobacteriia	Solibacterales	Solibacteraceae (Subgroup 3)	Candidatus Solibacter	B6869_Candidatus Solibacter	Not_predicted	Fer
KM205494.1.1479	-25.0054	0.206051	-3.83347	0.000126699	0.000661018	-2.74675	Acidobacteria	Thermoanaerobaculia	Thermoanaerobaculales	Thermoanaerobaculaceae	Subgroup 23	B4128_Subgroup 23	Not_predicted	Fer
KY190554.1.1473	-60.1158	0.157567	-5.41959	6.03635e-08	5.82283e-07	-2.96626	Acidobacteria	Subgroup 6	#N/A	#N/A	#N/A	B10931_o_NA	Not_predicted	Fer
KY287316.1.1519	-72.5478	0.190153	-6.54037	6.27151e-11	9.25767e-10	-2.195	Acidobacteria	Holophagae	Subgroup 7	uncultured Acidobacteriales bacterium	uncultured Acidobacteriales bacterium	B5266_uncultured Acidobacteriales bacterium	Not_predicted	Fer
LN555071.1.1388	-54.204	0.18121	-3.31633	0.000913563	0.00402498	-4.31347	Acidobacteria	Thermoanaerobaculia	Thermoanaerobaculales	Thermoanaerobaculaceae	Subgroup 10	B8122_Subgroup 10	Not_predicted	Fer
LN563753.1.1385	-71.5973	0.458107	-10.0599	9.35259e-24	5.65726e-22	7.41421	Acidobacteria	Subgroup 22	uncultured Acidobacterium sp.	uncultured Acidobacterium sp.	uncultured Acidobacterium sp.	B4359_uncultured Acidobacterium sp.	Not_predicted	Fer
06af4d9d7e1c19079431e7234923d64f	-42.3019	0.307016	-8.96904	3.22451e-19	1.36532e-17	11.961	Actinobacteria	Coriobacteriia	OPB41	#N/A	#N/A	B5211_o_OPB41	Not_predicted	Fer
45e35f0cee3e8a7ecfe2de7027f58127	-59.5473	0.300383	-5.95421	2.65293e-09	3.09316e-08	-2.22468	Actinobacteria	Acidimicrobiia	#N/A	#N/A	#N/A	B6399_o_NA	Not_predicted	Fer
4f9fb57ae15318ff0d7bc8d99278fd2a	-79.4461	0.209205	-4.00153	6.31408e-05	0.000352927	-4.30272	Actinobacteria	Coriobacteriia	OPB41	#N/A	#N/A	B5391_o_OPB41	Not_predicted	Fer
575ad5355aa033c4b0521c07daab2773	-48.2664	0.743213	-9.21757	3.30437e-20	1.51044e-18	10.8295	Actinobacteria	Acidimicrobiia	#N/A	#N/A	#N/A	B2331_o_NA	Not_predicted	Fer
5a4b6533743d100f241d9515e5e626c8	-17.5207	0.357702	-3.27792	0.00104739	0.00453511	-2.88886	Actinobacteria	Thermoleophilia	Gaiellales	uncultured	metagenome	B7290_metagenome	Not_predicted	Fer
639ac209e289baade1297e43a96a7a73	-39.5082	0.13208	-2.4172	0.0156484	0.0481338	-4.45912	Actinobacteria	Coriobacteriia	OPB41	uncultured soil bacterium	uncultured soil bacterium	B14079_uncultured soil bacterium	Not_predicted	Fer
72d5eb0fc57592ffbe075457750a3da1	-27.6372	0.208988	-3.95007	7.83707e-05	0.000426873	-2.81475	Actinobacteria	Coriobacteriia	CG2-30-50-142	Actinobacteria bacterium CG2_30_50_142	Actinobacteria bacterium CG2_30_50_142	B13528_Actinobacteria bacterium CG2_30_50_142	Not_predicted	Fer
879df4da418e038411db437b209f0a42	-26.2418	0.496049	-4.27662	1.90548e-05	0.000118011	-2.04504	Actinobacteria	MB-A2-108	#N/A	#N/A	#N/A	B1717_o_NA	Not_predicted	Fer
a3d90261761fb6b9c255f00b39231129	-24.1924	1.82398	-8.45256	3.0244e-17	1.03099e-15	18.4898	Actinobacteria	Acidimicrobiia	Microtrichales	Ilumatobacteraceae	uncultured	B410_uncultured	Not_predicted	Fer
AB367437.1.1496	-26.5144	0.413034	-4.23833	2.26103e-05	0.000138222	-2.16006	Actinobacteria	Actinobacteria	Glycomycetales	Glycomycetaceae	Glycomyces	B6794_Glycomyces	Not_predicted	Fer
AB661542.1.1443	-58.7114	0.327351	-4.96831	6.80466e-07	5.55208e-06	-3.38063	Actinobacteria	MB-A2-108	#N/A	#N/A	#N/A	B3292_o_NA	Not_predicted	Fer
b3fcb3dd0b52aedc3a889d101b4b4b77	-45.0453	0.252134	-5.66761	1.46613e-08	1.55198e-07	-1.46208	Actinobacteria	Thermoleophilia	Gaiellales	uncultured	#N/A	B4412_f_uncultured	Not_predicted	Fer
bff317fc5e34806f8ea5b31bc23e7886	-31.6679	0.235885	-5.2971	1.18784e-07	1.10221e-06	-0.441638	Actinobacteria	Acidimicrobiia	Microtrichales	uncultured	uncultured Streptomycetaceae bacterium	B15129_uncultured Streptomycetaceae bacterium	Not_predicted	Fer
d35a142b73b2751554f8d294072c54e2	-59.6921	0.247414	-8.20597	2.41156e-16	7.49073e-15	3.08979	Actinobacteria	MB-A2-108	uncultured Nocardioidaceae bacterium	uncultured Nocardioidaceae bacterium	uncultured Nocardioidaceae bacterium	B11752_uncultured Nocardioidaceae bacterium	Not_predicted	Fer
de567f9750d46a226a2211b73be7370a	-37.4688	0.404611	-6.39695	1.61701e-10	2.24678e-09	1.72076	Actinobacteria	Acidimicrobiia	uncultured	uncultured Iamia sp.	uncultured Iamia sp.	B2947_uncultured Iamia sp.	Not_predicted	Fer
ed963207d3830430feb7993399f55cae	-47.9403	0.125654	-4.32193	1.55346e-05	9.79434e-05	-3.5815	Actinobacteria	Thermoleophilia	Solirubrobacterales	Solirubrobacteraceae	Conexibacter	B14946_Conexibacter	Not_predicted	Fer
EF020102.1.1372	-36.6391	0.229109	-2.61962	0.00880891	0.0295528	-4.37501	Actinobacteria	Acidimicrobiia	Microtrichales	Ilumatobacteraceae	CL500-29 marine group	B2167_CL500-29 marine group	Not_predicted	Fer
EF464627.1.1380	-68.7975	0.526232	-11.9225	1.13968e-32	1.63727e-30	18.2759	Actinobacteria	Acidimicrobiia	Microtrichales	uncultured	uncultured actinobacterium	B1937_uncultured actinobacterium	Not_predicted	Fer
EF466110.1.1437	-78.524	0.205816	-7.07913	1.49417e-12	2.80856e-11	-1.7728	Actinobacteria	Actinobacteria	Propionibacteriales	Nocardioidaceae	Nocardioides	B5680_Nocardioides	Not_predicted	Fer
EU440650.1.1450	-88.6655	0.232398	-7.99341	1.37669e-15	3.85905e-14	-0.979904	Actinobacteria	Acidimicrobiia	Microtrichales	Iamiaceae	Iamia	B2979_Iamia	Not_predicted	Fer
EU644173.1.1418	-50.7112	0.133538	-2.55421	0.0106494	0.0348697	-4.48777	Actinobacteria	Acidimicrobiia	IMCC26256	uncultured Ferrimicrobium sp.	uncultured Ferrimicrobium sp.	B1103_uncultured Ferrimicrobium sp.	Not_predicted	Fer
f77a8adcf06c04319c983546474609a2	-81.8576	0.188005	-3.06688	0.0021657	0.00878622	-4.50292	Actinobacteria	Acidimicrobiia	Microtrichales	Ilumatobacteraceae	uncultured	B3525_uncultured	Not_predicted	Fer
fa59092fd5278a2b574b1b7ebab537a5	-38.2631	0.508832	-6.40049	1.58e-10	2.19916e-09	1.55429	Actinobacteria	MB-A2-108	#N/A	#N/A	#N/A	B1858_o_NA	Not_predicted	Fer
FJ478549.1.1510	-88.8225	0.213708	-8.43132	3.62498e-17	1.22533e-15	-0.183907	Actinobacteria	Thermoleophilia	Gaiellales	uncultured	#N/A	B5015_f_uncultured	Not_predicted	Fer
FJ791174.1.1415	-55.3125	0.491171	-10.3058	7.5584e-25	5.24201e-23	14.1472	Actinobacteria	Actinobacteria	Micrococcales	Cellulomonadaceae	Cellulomonas	B5140_Cellulomonas	Not_predicted	Fer
FPLM01008179.17.1542	-43.412	0.488938	-8.53817	1.45067e-17	5.07227e-16	9.09896	Actinobacteria	Thermoleophilia	Solirubrobacterales	Solirubrobacteraceae	Conexibacter	B3429_Conexibacter	Not_predicted	Fer
FPLS01017590.13.1514	-41.5138	0.413608	-6.05521	1.4251e-09	1.72137e-08	-0.0859075	Actinobacteria	Acidimicrobiia	uncultured	metagenome	metagenome	B2269_metagenome	Not_predicted	Fer
FPLS01022326.39.1544	-63.102	0.165394	-5.6888	1.29558e-08	1.38419e-07	-2.79419	Actinobacteria	Thermoleophilia	Solirubrobacterales	Solirubrobacteraceae	Conexibacter	B4757_Conexibacter	Not_predicted	Fer
FPLS01038675.10.1516	-52.6042	0.330747	-10.5977	3.5299e-26	2.70457e-24	17.2642	Actinobacteria	Thermoleophilia	Solirubrobacterales	Solirubrobacteraceae	Conexibacter	B1955_Conexibacter	Not_predicted	Fer
FPLS01057415.1.1349	-37.9349	0.238886	-2.9515	0.00316567	0.012345	-4.25672	Actinobacteria	Actinobacteria	Frankiales	Frankiaceae	Jatrophihabitans	B2609_Jatrophihabitans	Not_predicted	Fer
FQ658883.1.1362	-27.7797	0.390687	-5.43987	5.38863e-08	5.2675e-07	0.791817	Actinobacteria	Thermoleophilia	Solirubrobacterales	67-14	uncultured soil bacterium	B5580_uncultured soil bacterium	Not_predicted	Fer
GQ056820.1.1330	-43.4817	1.71825	-10.062	9.1583e-24	5.62431e-22	18.454	Actinobacteria	Actinobacteria	Corynebacteriales	Mycobacteriaceae	Mycobacterium	B155_Mycobacterium	Not_predicted	Fer
GQ487899.1.1485	-59.407	0.198604	-3.63466	0.000278985	0.00136109	-4.25095	Actinobacteria	Acidimicrobiia	Microtrichales	Ilumatobacteraceae	uncultured	B3462_uncultured	Not_predicted	Fer
GU180182.1.1511	-75.1335	0.180772	-7.13192	1.02042e-12	1.96866e-11	-1.45797	Actinobacteria	Thermoleophilia	Gaiellales	uncultured	#N/A	B1768_f_uncultured	Not_predicted	Fer
GU359085.1.1439	-43.9105	0.543848	-7.6445	2.18319e-14	5.27439e-13	4.74929	Actinobacteria	Thermoleophilia	Gaiellales	uncultured	uncultured Conexibacter sp.	B570_uncultured Conexibacter sp.	Not_predicted	Fer
HM141888.1.1474	-78.8241	0.37601	-4.08942	4.33981e-05	0.00024992	-4.27097	Actinobacteria	Coriobacteriia	OPB41	#N/A	#N/A	B2239_o_OPB41	Not_predicted	Fer
HM334859.1.1351	-24.8139	0.244827	-4.7703	1.85132e-06	1.39325e-05	-0.59949	Actinobacteria	Thermoleophilia	Solirubrobacterales	Solirubrobacteraceae	uncultured	B11542_uncultured	Not_predicted	Fer
HM459661.1.1467	-74.9855	0.197459	-3.77686	0.000159237	0.000814926	-4.3368	Actinobacteria	Thermoleophilia	Gaiellales	uncultured	bacterium Ellin7530	B2887_bacterium Ellin7530	Not_predicted	Fer
HM748665.1.1464	-11.5662	0.208988	-2.53424	0.011276	0.0364613	-3.48505	Actinobacteria	Thermoleophilia	Gaiellales	uncultured	bacterium Ellin6517	B1076_bacterium Ellin6517	Not_predicted	Fer
HQ330646.1.1412	-52.8247	0.176599	-3.23193	0.00123136	0.0052693	-4.32908	Actinobacteria	Thermoleophilia	Gaiellales	uncultured	#N/A	B6608_f_uncultured	Not_predicted	Fer
HQ857696.1.1491	-38.1103	0.280901	-6.97586	3.1261e-12	5.65157e-11	3.68174	Actinobacteria	Acidimicrobiia	Microtrichales	uncultured	wastewater metagenome	B8113_wastewater metagenome	Not_predicted	Fer
JF133208.1.1325	-91.6311	0.241292	-4.61526	3.94821e-06	2.79361e-05	-4.19957	Actinobacteria	Actinobacteria	Frankiales	#N/A	#N/A	B837_o_Frankiales	Not_predicted	Fer
JF174801.1.1366	-45.4323	0.372143	-6.33056	2.48988e-10	3.37224e-09	0.0190516	Actinobacteria	Thermoleophilia	Solirubrobacterales	67-14	metagenome	B2021_metagenome	Not_predicted	Fer
JF211647.1.1344	-16.3679	1.26465	-3.96939	7.22844e-05	0.000397219	-1.10747	Actinobacteria	Acidimicrobiia	Microtrichales	uncultured	metagenome	B976_metagenome	Not_predicted	Fer
JF228084.1.1345	-48.3088	0.421837	-7.17614	7.39841e-13	1.44117e-11	1.97235	Actinobacteria	Acidimicrobiia	Microtrichales	Iamiaceae	Iamia	B3329_Iamia	Not_predicted	Fer
JF239327.1.1340	-32.3258	0.115831	-4.14175	3.45946e-05	0.000202705	-2.92753	Actinobacteria	Acidimicrobiia	Microtrichales	Microtrichaceae	uncultured	B16189_uncultured	Not_predicted	Fer
JF775634.1.1511	-21.853	1.66758	-8.75284	2.22745e-18	8.74136e-17	22.3356	Actinobacteria	Thermoleophilia	Gaiellales	uncultured	uncultured prokaryote	B284_uncultured prokaryote	Not_predicted	Fer
JF777515.1.1420	-68.4254	0.170258	-6.1312	8.87052e-10	1.10813e-08	-2.51587	Actinobacteria	Actinobacteria	Streptosporangiales	Nocardiopsaceae	Nocardiopsis	B9375_Nocardiopsis	Not_predicted	Fer
JN023433.1.1479	-27.1912	0.876822	-5.33114	9.85593e-08	9.25215e-07	0.576858	Actinobacteria	Acidimicrobiia	Microtrichales	#N/A	#N/A	B691_o_Microtrichales	Not_predicted	Fer
JN051488.1.1437	-60.1158	0.157567	-5.41959	6.03635e-08	5.82283e-07	-2.96626	Actinobacteria	Actinobacteria	Corynebacteriales	Nocardiaceae	Rhodococcus	B10920_Rhodococcus	Not_predicted	Fer
JQ086858.1.1434	-83.68	0.192191	-3.13515	0.0017199	0.00708841	-4.49827	Actinobacteria	Coriobacteriia	OPB41	#N/A	#N/A	B6934_o_OPB41	Not_predicted	Fer
JQ087112.1.1439	-43.2148	0.627593	-7.98417	1.48357e-15	4.11563e-14	6.44577	Actinobacteria	Actinobacteria	Micrococcales	Microbacteriaceae	#N/A	B1551_f_Microbacteriaceae	Not_predicted	Fer
JX079307.1.1503	-29.648	0.287032	-4.66742	3.06804e-06	2.22364e-05	-1.6693	Actinobacteria	Thermoleophilia	Solirubrobacterales	67-14	#N/A	B3809_f_67-14	Not_predicted	Fer
JX949620.1.1379	-96.3354	0.239704	-8.63205	6.42826e-18	2.37226e-16	-0.414367	Actinobacteria	Actinobacteria	Pseudonocardiales	Pseudonocardiaceae	Umezawaea	B2155_Umezawaea	Not_predicted	Fer
KC140346.1.1218	-63.3252	0.157567	-5.6742	1.41092e-08	1.4955e-07	-2.82295	Actinobacteria	Actinobacteria	Corynebacteriales	Nocardiaceae	Rhodococcus	B10924_Rhodococcus	Not_predicted	Fer
KC554084.1.1511	-75.7385	0.199442	-3.81479	0.000136674	0.000708466	-4.33119	Actinobacteria	Actinobacteria	Propionibacteriales	Nocardioidaceae	Marmoricola	B1823_Marmoricola	Not_predicted	Fer
KC554152.1.1541	-44.1925	0.115831	-3.98406	6.79659e-05	0.000376056	-3.74297	Actinobacteria	Thermoleophilia	Solirubrobacterales	67-14	#N/A	B6391_f_67-14	Not_predicted	Fer
KC775391.1.1278	-58.914	0.155138	-2.96737	0.00300684	0.0117943	-4.44328	Actinobacteria	Actinobacteria	Propionibacteriales	Nocardioidaceae	Nocardioides	B11213_Nocardioides	Not_predicted	Fer
KF080558.1.1339	-56.1267	0.460674	-7.82407	5.3436e-15	1.39124e-13	2.52901	Actinobacteria	Actinobacteria	#N/A	#N/A	#N/A	B949_o_NA	Not_predicted	Fer
KF459924.1.1432	-130.053	0.399224	-10.6917	1.29338e-26	1.06176e-24	0.931169	Actinobacteria	Thermoleophilia	Solirubrobacterales	Solirubrobacteraceae	Solirubrobacter	B3273_Solirubrobacter	Not_predicted	Fer
KF494798.1.1496	-4.5443	6.47535	-2.58451	0.00975798	0.032377	-2.70638	Actinobacteria	Actinobacteria	Micrococcales	Micrococcaceae	#N/A	B50_f_Micrococcaceae	Not_predicted	Fer
KM374769.1.1489	-62.6808	0.155964	-5.61646	1.97259e-08	2.0583e-07	-2.86005	Actinobacteria	Actinobacteria	Corynebacteriales	Nocardiaceae	Rhodococcus	B11131_Rhodococcus	Not_predicted	Fer
KP214604.3.1216	-53.0671	0.190153	-6.79924	1.07862e-11	1.7855e-10	0.096616	Actinobacteria	Actinobacteria	Streptomycetales	Streptomycetaceae	Streptomyces	B4280_Streptomyces	Not_predicted	Fer
KR559980.1.1451	-37.7525	0.249607	-7.85942	4.03521e-15	1.07494e-13	7.78861	Actinobacteria	Acidimicrobiia	uncultured	uncultured Acidimicrobidae bacterium	uncultured Acidimicrobidae bacterium	B5477_uncultured Acidimicrobidae bacterium	Not_predicted	Fer
KT345229.1.1414	-36.9884	0.14248	-2.5691	0.0102028	0.0336201	-4.39582	Actinobacteria	Actinobacteria	Streptosporangiales	Streptosporangiaceae	Microbispora	B18411_Microbispora	Not_predicted	Fer
KU712013.1.1348	-97.3586	0.223607	-3.64764	0.000265272	0.00130288	-4.46009	Actinobacteria	Actinobacteria	Corynebacteriales	Nocardiaceae	Rhodococcus	B3650_Rhodococcus	Not_predicted	Fer
KX035298.1.1384	-82.8913	0.218277	-4.17505	2.9906e-05	0.000177823	-4.27504	Actinobacteria	Actinobacteria	Corynebacteriales	Mycobacteriaceae	Mycobacterium	B4671_Mycobacterium	Not_predicted	Fer
KX752912.1.1234	-10.6514	0.342774	-3.66089	0.00025193	0.0012419	-0.743357	Actinobacteria	Thermoleophilia	Gaiellales	uncultured	#N/A	B765_f_uncultured	Not_predicted	Fer
KY117527.1.1465	-28.736	2.54829	-11.2633	2.39655e-29	2.41003e-27	39.8726	Actinobacteria	Actinobacteria	Frankiales	Cryptosporangiaceae	Fodinicola	B529_Fodinicola	Not_predicted	Fer
KY190774.1.1440	-82.8932	0.199442	-7.86849	3.75404e-15	1.00336e-13	-0.76188	Actinobacteria	Coriobacteriia	OPB41	#N/A	#N/A	B6259_o_OPB41	Not_predicted	Fer
KY363637.1.1400	-76.2409	0.175105	-2.85644	0.00428821	0.0160235	-4.51661	Actinobacteria	Thermoleophilia	Solirubrobacterales	Solirubrobacteraceae	Conexibacter	B8816_Conexibacter	Not_predicted	Fer
LN562949.1.1351	-88.4701	0.220134	-7.92729	2.34573e-15	6.37546e-14	-1.07864	Actinobacteria	Actinobacteria	Frankiales	Cryptosporangiaceae	Fodinicola	B4546_Fodinicola	Not_predicted	Fer
LN563011.1.1353	-45.0191	0.117998	-4.05859	4.95414e-05	0.000280676	-3.70848	Actinobacteria	Acidimicrobiia	Microtrichales	Microtrichaceae	uncultured	B15959_uncultured	Not_predicted	Fer
LN774187.1.1401	-62.4945	0.86152	-14.0734	8.66032e-45	3.66696e-42	39.4672	Actinobacteria	Actinobacteria	Micrococcales	Intrasporangiaceae	#N/A	B642_f_Intrasporangiaceae	Not_predicted	Fer
023bb8046151c15325b7d61b917125ed	-52.0027	0.136303	-4.68818	2.77302e-06	2.01891e-05	-3.39163	Armatimonadetes	DG-56	uncultured bacterium	uncultured bacterium	uncultured bacterium	B4886_uncultured bacterium	Not_predicted	Fer
1192d7ef98ca7df294e50d40d433e8d4	-47.4225	0.117998	-4.24925	2.15366e-05	0.00013206	-3.62781	Armatimonadetes	Chthonomonadetes	Chthonomonadales	Chthonomonadaceae	Chthonomonas	B9994_Chthonomonas	Not_predicted	Fer
12b7f42cb7a0241f410c9ff63c863c64	-51.2453	0.134944	-2.58111	0.00985465	0.0326527	-4.48508	Armatimonadetes	Fimbriimonadia	Fimbriimonadales	Fimbriimonadaceae	#N/A	B13651_f_Fimbriimonadaceae	Not_predicted	Fer
20b1ce803d697b84d30efec812a3cf87	-49.043	0.117998	-4.65532	3.25362e-06	2.34291e-05	-3.2971	Armatimonadetes	uncultured	#N/A	#N/A	#N/A	B6263_o_NA	Not_predicted	Fer
2b2aea7003241e36e1fc589588cc08b9	-33.9609	0.339354	-5.51162	3.59535e-08	3.62918e-07	-0.267723	Armatimonadetes	uncultured bacterium	uncultured bacterium	uncultured bacterium	uncultured bacterium	B9530_uncultured bacterium	Not_predicted	Fer
2be450ba3fde24601bafebebf8cb9bb5	-30.442	0.355129	-5.8126	6.23605e-09	6.92943e-08	1.39888	Armatimonadetes	uncultured	#N/A	#N/A	#N/A	B2888_o_NA	Not_predicted	Fer
4c47c39e1d8c88fd69da1f2b47be888e	-20.7716	0.303219	-2.94453	0.00323789	0.0125658	-3.67979	Armatimonadetes	Chthonomonadetes	Chthonomonadales	Chthonomonadaceae	Chthonomonas	B7363_Chthonomonas	Not_predicted	Fer
50bf131ae0f4345c97bd7c019751f5c5	-44.1905	0.158346	-5.66193	1.51546e-08	1.59788e-07	-1.37744	Armatimonadetes	Chthonomonadetes	Chthonomonadales	uncultured Lutispora sp.	uncultured Lutispora sp.	B10779_uncultured Lutispora sp.	Not_predicted	Fer
5766c8f4a1a1bb495743b16259ad7aa1	-48.2486	0.120054	-4.32328	1.54404e-05	9.75788e-05	-3.59169	Armatimonadetes	uncultured	uncultured bacterium SJA-176	uncultured bacterium SJA-176	uncultured bacterium SJA-176	B15546_uncultured bacterium SJA-176	Not_predicted	Fer
5a4c10e3ef3b46e56862cf0b7d81c4c6	-48.5865	0.253015	-4.28267	1.85448e-05	0.000115029	-3.63973	Armatimonadetes	uncultured	#N/A	#N/A	#N/A	B5868_o_NA	Not_predicted	Fer
6629712e41cb2f6695132acac0cade30	-68.4713	0.164743	-6.49952	8.23025e-11	1.19302e-09	-2.00107	Armatimonadetes	uncultured	#N/A	#N/A	#N/A	B7235_o_NA	Not_predicted	Fer
73d0b6957923864e151c6670167da392	-38.2918	0.219968	-3.35625	0.000791396	0.00353514	-4.03656	Armatimonadetes	uncultured	uncultured soil bacterium	uncultured soil bacterium	uncultured soil bacterium	B3757_uncultured soil bacterium	Not_predicted	Fer
794ad6f6f0f1ef2e61d25b47d23fd64e	-60.7039	0.159109	-5.47261	4.4829e-08	4.45797e-07	-2.93303	Armatimonadetes	uncultured	uncultured bacterium SJA-121	uncultured bacterium SJA-121	uncultured bacterium SJA-121	B10696_uncultured bacterium SJA-121	Not_predicted	Fer
7cb594a0035ca09cbbbed2f4a6cab697	-30.5314	0.221591	-4.2123	2.53784e-05	0.000152936	-2.65689	Armatimonadetes	uncultured bacterium	uncultured bacterium	uncultured bacterium	uncultured bacterium	B9085_uncultured bacterium	Not_predicted	Fer
9af51ce10eda97f407a70428d6bffbf1	-34.9415	0.21758	-2.68917	0.00716848	0.0249764	-4.32738	Armatimonadetes	uncultured bacterium	uncultured bacterium	uncultured bacterium	uncultured bacterium	B10192_uncultured bacterium	Not_predicted	Fer
AB426226.1.1392	-36.407	0.407272	-6.65304	2.93847e-11	4.50285e-10	2.89788	Armatimonadetes	DG-56	uncultured bacterium	uncultured bacterium	uncultured bacterium	B1790_uncultured bacterium	Not_predicted	Fer
AB672160.1.1439	-32.3373	0.203637	-2.51598	0.0118772	0.0380384	-4.36186	Armatimonadetes	Chthonomonadetes	Chthonomonadales	uncultured bacterium	uncultured bacterium	B1757_uncultured bacterium	Not_predicted	Fer
AB930737.1.1451	-28.8577	0.0718045	-2.58577	0.00972256	0.0322815	-4.27497	Armatimonadetes	uncultured	uncultured bacterium	uncultured bacterium	uncultured bacterium	B16104_uncultured bacterium	Not_predicted	Fer
c063edd264c74eac2213fe1cc08f875c	-64.8717	0.170826	-3.26745	0.00108689	0.00468095	-4.40679	Armatimonadetes	Chthonomonadetes	Chthonomonadales	uncultured bacterium	uncultured bacterium	B4902_uncultured bacterium	Not_predicted	Fer
df1b192b03b9adbcdd251be340d918c4	-23.2564	0.0833333	-2.97973	0.00288815	0.0113675	-3.78825	Armatimonadetes	DG-56	uncultured bacterium	uncultured bacterium	uncultured bacterium	B4925_uncultured bacterium	Not_predicted	Fer
e1b0d5bcc39887abd081e75bf5dbc4e6	-43.6048	0.145776	-2.66784	0.00763955	0.0263551	-4.42311	Armatimonadetes	DG-56	uncultured bacterium	uncultured bacterium	uncultured bacterium	B12411_uncultured bacterium	Not_predicted	Fer
f8cfe17cd95c5dcc56d14ef9170a184b	-48.1365	0.172485	-6.1675	7.0585e-10	8.94262e-09	-0.755392	Armatimonadetes	Chthonomonadetes	Chthonomonadales	uncultured bacterium	uncultured bacterium	B4354_uncultured bacterium	Not_predicted	Fer
FPLL01003559.1.1434	-61.3601	0.539104	-6.68476	2.36845e-11	3.72152e-10	-1.11631	Armatimonadetes	Fimbriimonadia	Fimbriimonadales	Fimbriimonadaceae	metagenome	B2900_metagenome	Not_predicted	Fer
HM187268.1.1454	-32.5641	0.275565	-6.94068	4.01047e-12	7.06e-11	5.27002	Armatimonadetes	uncultured	#N/A	#N/A	#N/A	B4931_o_NA	Not_predicted	Fer
HQ119622.1.1485	-10.8606	1.83362	-2.88401	0.00393028	0.0149288	-2.76809	Armatimonadetes	Chthonomonadetes	Chthonomonadales	Chthonomonadaceae	Chthonomonas	B541_Chthonomonas	Not_predicted	Fer
JF115297.1.1335	-36.6627	0.0960953	-3.30523	0.000950485	0.00417166	-4.02767	Armatimonadetes	Armatimonadia	Armatimonadales	uncultured Armatimonadetes bacterium	uncultured Armatimonadetes bacterium	B7753_uncultured Armatimonadetes bacterium	Not_predicted	Fer
JN656758.1.1467	-57.2399	0.15073	-2.88305	0.00394227	0.0149461	-4.4529	Armatimonadetes	Fimbriimonadia	Fimbriimonadales	Fimbriimonadaceae	uncultured Armatimonadetes bacterium	B11772_uncultured Armatimonadetes bacterium	Not_predicted	Fer
JX222349.1.1506	-6.91864	0.367367	-2.40684	0.0160996	0.0493789	-3.22369	Armatimonadetes	uncultured	uncultured bacterium SJA-176	uncultured bacterium SJA-176	uncultured bacterium SJA-176	B2512_uncultured bacterium SJA-176	Not_predicted	Fer
KT167039.1.1386	-30.0972	0.313145	-6.58073	4.78684e-11	7.19815e-10	4.50528	Armatimonadetes	uncultured bacterium	uncultured bacterium	uncultured bacterium	uncultured bacterium	B5034_uncultured bacterium	Not_predicted	Fer
0f352dd114328c6d221606998f523cb6	-19.8701	0.212329	-3.42627	0.000613048	0.00279274	-2.89749	Bacteroidetes	Bacteroidia	Flavobacteriales	Crocinitomicaceae	Crocinitomix	B9184_Crocinitomix	Not_predicted	Fer
1736c14ee31d71fe0e86d7c91816b9fe	-29.8438	0.0718045	-2.83287	0.00461739	0.0170087	-4.15687	Bacteroidetes	Bacteroidia	Bacteroidales	Dysgonomonadaceae	uncultured	B20118_uncultured	Not_predicted	Fer
1ae75a4edb037074a89226c5a8934035	-46.1577	0.165394	-5.91397	3.3889e-09	3.88926e-08	-1.07398	Bacteroidetes	Ignavibacteria	Kryptoniales	BSV26	#N/A	B9909_f_BSV26	Not_predicted	Fer
1b6256ff2b2ddf2785db81f81db2d313	-75.5401	0.305634	-3.39918	0.000677085	0.00305848	-4.42977	Bacteroidetes	Bacteroidia	Sphingobacteriales	env.OPS 17	#N/A	B2910_f_env.OPS 17	Not_predicted	Fer
1c35ccbf07510bd4df9870e75452d03c	-36.6627	0.0960953	-3.30523	0.000950485	0.00417166	-4.02767	Bacteroidetes	Ignavibacteria	SJA-28	#N/A	#N/A	B14410_o_SJA-28	Not_predicted	Fer
1e1f4ecb139bc4f64840c881093097b9	-19.4098	0.226942	-2.47332	0.0133939	0.0421407	-4.07983	Bacteroidetes	Bacteroidia	Chitinophagales	Saprospiraceae	uncultured	B12465_uncultured	Not_predicted	Fer
33f19fb9f320d7302a4dcb16adb16f94	-68.5946	0.246399	-2.77182	0.00557912	0.0200286	-4.51021	Bacteroidetes	Bacteroidia	Bacteroidales	Paludibacteraceae	uncultured	B6786_uncultured	Not_predicted	Fer
35f2b9a0395b713c9f1d9e575855517f	-47.636	0.247414	-8.37785	5.70879e-17	1.85191e-15	6.82205	Bacteroidetes	Ignavibacteria	Kryptoniales	BSV26	uncultured bacterium	B8762_uncultured bacterium	Not_predicted	Fer
402dff9bed6927fc048c7de5a346d5c9	-42.3673	0.231663	-3.59187	0.000329024	0.0015848	-3.98422	Bacteroidetes	Bacteroidia	Bacteroidales	Bacteroidetes BD2-2	uncultured Cytophagales bacterium	B12756_uncultured Cytophagales bacterium	Not_predicted	Fer
47ae500967363839da45f4298117ff4d	-27.3952	0.0718045	-2.46974	0.0135285	0.0424308	-4.30529	Bacteroidetes	Bacteroidia	Cytophagales	Microscillaceae	Ohtaekwangia	B20205_Ohtaekwangia	Not_predicted	Fer
4a42d37746eec2df97a69484d3d6603a	-50.3918	0.13208	-4.54295	5.57673e-06	3.81828e-05	-3.46876	Bacteroidetes	Ignavibacteria	OPB56	uncultured bacterium	#N/A	B14061_f_uncultured bacterium	Not_predicted	Fer
4e98b2e9188798d0bd5e3ffec783190f	-57.2476	0.287094	-3.4644	0.000532434	0.00246883	-4.29142	Bacteroidetes	Ignavibacteria	SJA-28	uncultured Chlorobi bacterium	uncultured Chlorobi bacterium	B3198_uncultured Chlorobi bacterium	Not_predicted	Fer
544fe92e3d6d48ac9b94cf8c8b2a85d9	-43.9565	0.10576	-4.1725	3.02437e-05	0.000179168	-3.56563	Bacteroidetes	Ignavibacteria	OPB56	uncultured bacterium	#N/A	B11055_f_uncultured bacterium	Not_predicted	Fer
5b85271194671e860bfb036e2366fc9a	-54.7904	0.143609	-4.93949	7.89025e-07	6.30358e-06	-3.25241	Bacteroidetes	Bacteroidia	Cytophagales	Microscillaceae	#N/A	B3007_f_Microscillaceae	Not_predicted	Fer
8d380dad0006add0bba8933218d702e9	-34.5749	0.447537	-7.47886	7.7772e-14	1.71889e-12	7.09869	Bacteroidetes	Ignavibacteria	OPB56	uncultured prokaryote	uncultured prokaryote	B2065_uncultured prokaryote	Not_predicted	Fer
903917bf858e3381ac68dd9f6a484715	-22.6651	0.472687	-5.02946	4.95719e-07	4.14559e-06	0.687874	Bacteroidetes	Bacteroidia	Sphingobacteriales	env.OPS 17	#N/A	B2351_f_env.OPS 17	Not_predicted	Fer
95b91aed6d600f0eeb6eb96a818bea4e	-19.5242	0.557163	-4.57817	4.71617e-06	3.28783e-05	-0.00598974	Bacteroidetes	Ignavibacteria	Kryptoniales	BSV26	uncultured bacterium	B1781_uncultured bacterium	Not_predicted	Fer
a28a30eab2e5da6b96647d705e598ff5	-31.888	0.421138	-4.57432	4.80372e-06	3.34018e-05	-2.14601	Bacteroidetes	Bacteroidia	Bacteroidales	Bacteroidetes vadinHA17	uncultured prokaryote	B1344_uncultured prokaryote	Not_predicted	Fer
a41c8a6420edd925f1534929f6b8ed40	-27.7911	0.0995823	-3.56074	0.000370587	0.00176412	-3.393	Bacteroidetes	Bacteroidia	Bacteroidales	SB-5	uncultured soil bacterium	B17906_uncultured soil bacterium	Not_predicted	Fer
a495f1962c2eb11352239b9e4ea11ad7	-65.3966	0.162722	-5.85981	4.70001e-09	5.28834e-08	-2.70109	Bacteroidetes	Bacteroidia	Bacteroidales	SB-5	#N/A	B10281_f_SB-5	Not_predicted	Fer
AB240242.1.1484	-51.7936	0.411744	-5.1888	2.13528e-07	1.89816e-06	-2.80694	Bacteroidetes	Bacteroidia	Bacteroidales	Bacteroidetes vadinHA17	uncultured prokaryote	B6542_uncultured prokaryote	Not_predicted	Fer
AB240349.1.1474	-29.1842	0.403039	-5.4811	4.27319e-08	4.26524e-07	0.600263	Bacteroidetes	Bacteroidia	Bacteroidales	Prolixibacteraceae	WCHB1-32	B4823_WCHB1-32	Not_predicted	Fer
AB252951.1.1503	-33.482	0.308242	-5.52065	3.41557e-08	3.46074e-07	-0.156368	Bacteroidetes	Ignavibacteria	Kryptoniales	BSV26	uncultured Chlorobi bacterium	B2989_uncultured Chlorobi bacterium	Not_predicted	Fer
AB307635.1.1397	-50.4996	0.125654	-4.52497	6.07189e-06	4.13269e-05	-3.4901	Bacteroidetes	Bacteroidia	Bacteroidales	Paludibacteraceae	uncultured	B11276_uncultured	Not_predicted	Fer
AB552875.1.1385	-41.2563	0.147831	-5.28597	1.26229e-07	1.16192e-06	-1.80554	Bacteroidetes	Bacteroidia	Cytophagales	Spirosomaceae	Emticicia	B12123_Emticicia	Not_predicted	Fer
AB630512.1.1440	-92.8972	0.311778	-4.63517	3.58696e-06	2.54696e-05	-4.20314	Bacteroidetes	Bacteroidia	Bacteroidales	Prolixibacteraceae	BSV13	B7885_BSV13	Not_predicted	Fer
AB630675.1.1438	-36.9747	0.233712	-4.75129	2.03398e-06	1.52076e-05	-2.35343	Bacteroidetes	Ignavibacteria	SJA-28	Chlorobi bacterium OLB5	Chlorobi bacterium OLB5	B5252_Chlorobi bacterium OLB5	Not_predicted	Fer
AB930517.1.1457	-43.7512	0.424256	-8.68208	4.15143e-18	1.56799e-16	9.72855	Bacteroidetes	Ignavibacteria	Kryptoniales	BSV26	uncultured bacterium	B1652_uncultured bacterium	Not_predicted	Fer
ad232df10aaeb6894f449cef25c64cba	-55.1748	0.508044	-3.56928	0.000358724	0.00171986	-4.22778	Bacteroidetes	Bacteroidia	Bacteroidales	Bacteroidetes BD2-2	#N/A	B2883_f_Bacteroidetes BD2-2	Not_predicted	Fer
af6f12dce6e38a67a730147891b542cc	-36.4902	0.240802	-7.5672	3.96316e-14	9.05784e-13	6.81347	Bacteroidetes	Ignavibacteria	SJA-28	#N/A	#N/A	B7594_o_SJA-28	Not_predicted	Fer
AM162484.1.1488	-61.3769	0.501414	-7.62171	2.6043e-14	6.16224e-13	1.04266	Bacteroidetes	Bacteroidia	Sphingobacteriales	Lentimicrobiaceae	metagenome	B594_metagenome	Not_predicted	Fer
AY118152.1.1483	-36.2837	0.321173	-6.61116	3.90051e-11	5.92068e-10	2.77323	Bacteroidetes	Ignavibacteria	SJA-28	uncultured Chlorobi bacterium	uncultured Chlorobi bacterium	B6515_uncultured Chlorobi bacterium	Not_predicted	Fer
d00cbe79930380c7ccba08bddaf066ee	-57.9207	0.290597	-3.3596	0.000781874	0.00349843	-4.33306	Bacteroidetes	Bacteroidia	Bacteroidales	#N/A	#N/A	B3702_o_Bacteroidales	Not_predicted	Fer
db3775fc31a123ea628a55caf08ca01a	-15.3822	0.360659	-2.99052	0.00278812	0.0110386	-3.14648	Bacteroidetes	Ignavibacteria	#N/A	#N/A	#N/A	B3185_o_NA	Not_predicted	Fer
DQ640726.1.1425	-67.4657	0.427482	-5.6806	1.35913e-08	1.44824e-07	-3.00509	Bacteroidetes	Ignavibacteria	Kryptoniales	BSV26	uncultured Bacteroidetes bacterium	B2917_uncultured Bacteroidetes bacterium	Not_predicted	Fer
e01df6e93fd2345afca99900ac66c36a	-22.217	0.195678	-3.28748	0.00101246	0.00439572	-3.34334	Bacteroidetes	Ignavibacteria	Kryptoniales	MSB-3C8	#N/A	B15152_f_MSB-3C8	Not_predicted	Fer
e252f2ad40fdb1f4942aa72d5feae5b1	-40.7712	0.136303	-2.49447	0.0126217	0.0400759	-4.4484	Bacteroidetes	Ignavibacteria	Kryptoniales	BSV26	uncultured bacterium	B9792_uncultured bacterium	Not_predicted	Fer
eecef167050f862f03986705a2c527a7	-13.4382	0.814233	-3.17669	0.00149174	0.00626033	-2.53271	Bacteroidetes	Bacteroidia	Sphingobacteriales	env.OPS 17	uncultured Bacteroidetes bacterium	B1856_uncultured Bacteroidetes bacterium	Not_predicted	Fer
EU133709.1.1380	-24.9307	1.39024	-5.34658	9.05246e-08	8.54777e-07	1.18821	Bacteroidetes	Bacteroidia	Chitinophagales	Chitinophagaceae	Terrimonas	B871_Terrimonas	Not_predicted	Fer
EU335240.1.1487	-19.9751	0.642213	-4.07405	4.63639e-05	0.000265101	-1.53389	Bacteroidetes	Bacteroidia	Sphingobacteriales	AKYH767	#N/A	B1530_f_AKYH767	Not_predicted	Fer
EU431802.1.1493	-66.8108	0.2394	-8.56016	1.19978e-17	4.25208e-16	2.90973	Bacteroidetes	Bacteroidia	Chitinophagales	Chitinophagaceae	Ferruginibacter	B2510_Ferruginibacter	Not_predicted	Fer
EU682684.1.1513	-52.4364	0.200801	-3.71215	0.000206011	0.00103262	-4.12221	Bacteroidetes	Bacteroidia	Cytophagales	Hymenobacteraceae	Adhaeribacter	B10816_Adhaeribacter	Not_predicted	Fer
fd358ae941d57fcec08484c78582e78f	-41.3105	0.10279	-3.70159	0.000214771	0.0010728	-3.87565	Bacteroidetes	Ignavibacteria	Kryptoniales	BSV26	uncultured bacterium	B17664_uncultured bacterium	Not_predicted	Fer
FJ485067.1.1365	-32.3186	0.699529	-7.57551	3.71794e-14	8.59506e-13	8.51353	Bacteroidetes	Ignavibacteria	OPB56	#N/A	#N/A	B2948_o_OPB56	Not_predicted	Fer
FJ485405.1.1353	-43.9565	0.10576	-4.1725	3.02437e-05	0.000179168	-3.56563	Bacteroidetes	Bacteroidia	Chitinophagales	Chitinophagaceae	#N/A	B17325_f_Chitinophagaceae	Not_predicted	Fer
FJ517047.1.1484	-34.5247	0.922843	-6.24494	4.31717e-10	5.65662e-09	1.89476	Bacteroidetes	Bacteroidia	Sphingobacteriales	Lentimicrobiaceae	uncultured soil bacterium	B817_uncultured soil bacterium	Not_predicted	Fer
FJ546393.1.1207	-53.6678	0.133538	-4.80885	1.528e-06	1.16963e-05	-3.33929	Bacteroidetes	Bacteroidia	Sphingobacteriales	env.OPS 17	uncultured Sphingobacteriales bacterium	B4081_uncultured Sphingobacteriales bacterium	Not_predicted	Fer
FJ810564.1.1474	-33.5946	0.0880535	-3.02863	0.00245948	0.00984404	-4.12848	Bacteroidetes	Bacteroidia	Chitinophagales	Saprospiraceae	uncultured	B19142_uncultured	Not_predicted	Fer
FM201011.1.1384	-55.754	0.146817	-2.80821	0.0049862	0.0180992	-4.46121	Bacteroidetes	Bacteroidia	Sphingobacteriales	env.OPS 17	#N/A	B7661_f_env.OPS 17	Not_predicted	Fer
FN421523.1.1393	-49.1473	0.176107	-6.29702	3.09159e-10	4.11105e-09	-0.587484	Bacteroidetes	Bacteroidia	Cytophagales	Spirosomaceae	Dyadobacter	B8682_Dyadobacter	Not_predicted	Fer
FPLP01004071.2.1405	-23.0406	0.247414	-2.84491	0.00444648	0.0165228	-3.9107	Bacteroidetes	Bacteroidia	Flavobacteriales	NS9 marine group	metagenome	B14179_metagenome	Not_predicted	Fer
FPLP01012663.15.1441	-38.62	0.0960953	-3.46051	0.000540173	0.00248752	-3.97393	Bacteroidetes	Bacteroidia	Flavobacteriales	Crocinitomicaceae	Crocinitomix	B10500_Crocinitomix	Not_predicted	Fer
FPLS01009302.2.1274	-24.0743	0.760951	-6.11535	9.79683e-10	1.21441e-08	4.54875	Bacteroidetes	Bacteroidia	Sphingobacteriales	env.OPS 17	#N/A	B1887_f_env.OPS 17	Not_predicted	Fer
FPLS01009683.16.1519	-23.2564	0.0833333	-2.97973	0.00288815	0.0113675	-3.78825	Bacteroidetes	Bacteroidia	Flavobacteriales	NS9 marine group	metagenome	B19564_metagenome	Not_predicted	Fer
FPLS01011485.12.1510	-29.8438	0.0718045	-2.83287	0.00461739	0.0170087	-4.15687	Bacteroidetes	Bacteroidia	Bacteroidetes VC2.1 Bac22	metagenome	metagenome	B4730_metagenome	Not_predicted	Fer
FPLS01013181.28.1412	-34.0777	0.429315	-7.0933	1.34914e-12	2.56592e-11	5.44134	Bacteroidetes	Bacteroidia	Chitinophagales	uncultured	uncultured delta proteobacterium	B3871_uncultured delta proteobacterium	Not_predicted	Fer
FPLS01020381.19.1521	-50.1578	0.13208	-2.52634	0.0115328	0.0370978	-4.49053	Bacteroidetes	Bacteroidia	Cytophagales	Microscillaceae	OLB12	B14181_OLB12	Not_predicted	Fer
FPLS01020433.13.1513	-10.0616	0.847169	-2.46498	0.0137098	0.0429331	-3.4434	Bacteroidetes	Bacteroidia	Cytophagales	Hymenobacteraceae	Adhaeribacter	B4915_Adhaeribacter	Not_predicted	Fer
FPLS01021062.17.1346	-59.81	0.148821	-5.35922	8.44205e-08	7.99015e-07	-3.02076	Bacteroidetes	Bacteroidia	Chitinophagales	Chitinophagaceae	uncultured	B10659_uncultured	Not_predicted	Fer
FPLS01031559.12.1515	-18.3522	0.621103	-4.26406	2.0158e-05	0.000124631	-0.693161	Bacteroidetes	Bacteroidia	Cytophagales	Microscillaceae	#N/A	B3642_f_Microscillaceae	Not_predicted	Fer
FPLS01039997.21.1325	-54.7333	0.478593	-7.94535	2.0288e-15	5.53279e-14	3.21852	Bacteroidetes	Bacteroidia	Chitinophagales	Chitinophagaceae	Ferruginibacter	B2093_Ferruginibacter	Not_predicted	Fer
FPLS01051879.12.1515	-42.9625	0.301176	-7.03908	1.99196e-12	3.67552e-11	2.6699	Bacteroidetes	Bacteroidia	Cytophagales	Microscillaceae	uncultured	B4709_uncultured	Not_predicted	Fer
FQ659562.1.1344	-77.1063	0.191858	-6.90905	5.01233e-12	8.72818e-11	-1.93851	Bacteroidetes	Bacteroidia	Flavobacteriales	Flavobacteriaceae	Flavobacterium	B4553_Flavobacterium	Not_predicted	Fer
FR667812.1.1511	-49.7446	0.334338	-8.10541	5.5286e-16	1.64124e-14	5.02153	Bacteroidetes	Ignavibacteria	Ignavibacteriales	SR-FBR-L83	uncultured bacterium	B7479_uncultured bacterium	Not_predicted	Fer
GQ008725.1.1361	-47.3541	0.169681	-6.06726	1.32239e-09	1.6022e-08	-0.88296	Bacteroidetes	Bacteroidia	Chitinophagales	Chitinophagaceae	Ferruginibacter	B9435_Ferruginibacter	Not_predicted	Fer
HG942107.1.1206	-45.8034	0.120054	-4.12929	3.65231e-05	0.000212765	-3.67517	Bacteroidetes	Bacteroidia	Flavobacteriales	Weeksellaceae	Chryseobacterium	B5658_Chryseobacterium	Not_predicted	Fer
HM243810.1.1486	-11.1316	0.789014	-2.65518	0.00793242	0.0270752	-3.23901	Bacteroidetes	Bacteroidia	Bacteroidales	Bacteroidetes vadinHA17	#N/A	B2009_f_Bacteroidetes vadinHA17	Not_predicted	Fer
HM267236.1.1345	-30.9123	0.176107	-4.07633	4.5912e-05	0.000262704	-2.90944	Bacteroidetes	Bacteroidia	Chitinophagales	Chitinophagaceae	uncultured	B13995_uncultured	Not_predicted	Fer
HM269457.1.1338	-34.6267	0.233712	-3.49757	0.000470447	0.00220043	-3.81238	Bacteroidetes	Bacteroidia	Cytophagales	Spirosomaceae	uncultured	B11012_uncultured	Not_predicted	Fer
HM269680.1.1344	-55.8358	0.812987	-11.9495	8.24871e-33	1.20656e-30	25.3236	Bacteroidetes	Bacteroidia	Flavobacteriales	Flavobacteriaceae	Flavobacterium	B1536_Flavobacterium	Not_predicted	Fer
HM272742.1.1351	-34.3801	0.366358	-6.57283	5.04713e-11	7.56393e-10	3.1456	Bacteroidetes	Bacteroidia	Cytophagales	Cytophagaceae	Cytophaga	B6046_Cytophaga	Not_predicted	Fer
HM277484.1.1341	-71.927	0.178971	-6.44495	1.18031e-10	1.66589e-09	-2.29127	Bacteroidetes	Bacteroidia	Cytophagales	Spirosomaceae	Dyadobacter	B8357_Dyadobacter	Not_predicted	Fer
HM331033.1.1352	-64.7531	0.354545	-6.02458	1.72243e-09	2.04682e-08	-2.45226	Bacteroidetes	Bacteroidia	Sphingobacteriales	Sphingobacteriaceae	Mucilaginibacter	B3402_Mucilaginibacter	Not_predicted	Fer
HQ114086.1.1454	-33.491	0.0833333	-3.00094	0.00269453	0.0107102	-4.14296	Bacteroidetes	Bacteroidia	Sphingobacteriales	AKYH767	uncultured bacterium	B15205_uncultured bacterium	Not_predicted	Fer
HQ119852.1.1496	-31.6865	0.113541	-4.05985	4.92743e-05	0.000279754	-2.9974	Bacteroidetes	Bacteroidia	Chitinophagales	Chitinophagaceae	uncultured	B16434_uncultured	Not_predicted	Fer
HQ178750.1.1443	-36.708	0.640287	-7.76277	8.67007e-15	2.2073e-13	7.70215	Bacteroidetes	Bacteroidia	Sphingobacteriales	Lentimicrobiaceae	uncultured soil bacterium	B2376_uncultured soil bacterium	Not_predicted	Fer
HQ178809.1.1446	-47.2606	0.123873	-4.26066	2.04669e-05	0.000126045	-3.61175	Bacteroidetes	Bacteroidia	Bacteroidales	SB-5	#N/A	B5122_f_SB-5	Not_predicted	Fer
JF176697.1.1348	-28.6863	0.10279	-3.67544	0.000238004	0.0011783	-3.30667	Bacteroidetes	Bacteroidia	Chitinophagales	Chitinophagaceae	Taibaiella	B5507_Taibaiella	Not_predicted	Fer
JF265922.1.1363	-67.616	0.608047	-9.32513	1.20993e-20	5.72581e-19	5.41645	Bacteroidetes	Bacteroidia	Chitinophagales	Chitinophagaceae	Terrimonas	B243_Terrimonas	Not_predicted	Fer
JF775642.1.1486	-37.0709	0.895942	-8.63315	6.36675e-18	2.36039e-16	12.406	Bacteroidetes	Bacteroidia	Sphingobacteriales	Lentimicrobiaceae	metagenome	B813_metagenome	Not_predicted	Fer
JQ771967.1.1225	-34.5219	0.307166	-5.23611	1.65498e-07	1.49936e-06	-1.06355	Bacteroidetes	Bacteroidia	Cytophagales	Microscillaceae	#N/A	B3522_f_Microscillaceae	Not_predicted	Fer
JQ798415.1.1483	-30.3607	0.457828	-6.57071	5.11938e-11	7.65528e-10	4.37275	Bacteroidetes	Bacteroidia	Cytophagales	Cytophagaceae	Cytophaga	B4733_Cytophaga	Not_predicted	Fer
JX223525.1.1474	-8.16313	0.964601	-3.07004	0.00214293	0.0087114	-1.91811	Bacteroidetes	Bacteroidia	Flavobacteriales	Flavobacteriaceae	Flavobacterium	B1646_Flavobacterium	Not_predicted	Fer
JX225884.1.1396	-44.1484	0.25944	-4.83712	1.32627e-06	1.02792e-05	-2.798	Bacteroidetes	Bacteroidia	Bacteroidales	Prolixibacteraceae	WCHB1-32	B6702_WCHB1-32	Not_predicted	Fer
JX843375.1.1209	-42.1592	0.512916	-9.82163	1.01173e-22	5.73192e-21	17.5094	Bacteroidetes	Bacteroidia	Sphingobacteriales	Sphingobacteriaceae	Sphingobacterium	B2577_Sphingobacterium	Not_predicted	Fer
KC119214.1.1457	-63.3252	0.157567	-5.6742	1.41092e-08	1.4955e-07	-2.82295	Bacteroidetes	Bacteroidia	Sphingobacteriales	Sphingobacteriaceae	Pedobacter	B10923_Pedobacter	Not_predicted	Fer
KC331388.1.1484	-68.605	0.157567	-2.57035	0.010166	0.0335598	-4.53366	Bacteroidetes	Bacteroidia	Cytophagales	Microscillaceae	#N/A	B10926_f_Microscillaceae	Not_predicted	Fer
KC331599.1.1483	-16.7062	0.177564	-2.85361	0.00432654	0.0161368	-3.49088	Bacteroidetes	Bacteroidia	Sphingobacteriales	NS11-12 marine group	#N/A	B8871_f_NS11-12 marine group	Not_predicted	Fer
KC424697.1.1525	-12.4627	0.706043	-4.5874	4.51268e-06	3.16242e-05	2.02894	Bacteroidetes	Ignavibacteria	Kryptoniales	BSV26	uncultured bacterium	B2163_uncultured bacterium	Not_predicted	Fer
KC835976.1.1484	-47.1904	0.113541	-4.47947	7.5206e-06	5.01269e-05	-3.39831	Bacteroidetes	Bacteroidia	Bacteroidales	Paludibacteraceae	Paludibacter	B7801_Paludibacter	Not_predicted	Fer
KF037870.1.1478	-48.2486	0.120054	-4.32328	1.54404e-05	9.75788e-05	-3.59169	Bacteroidetes	Ignavibacteria	OPB56	uncultured bacterium	#N/A	B3699_f_uncultured bacterium	Not_predicted	Fer
KJ192083.1.1494	-18.3852	1.88767	-4.81664	1.46966e-06	1.12927e-05	1.10574	Bacteroidetes	Bacteroidia	Chitinophagales	Chitinophagaceae	Terrimonas	B323_Terrimonas	Not_predicted	Fer
KJ192086.1.1464	-45.4092	0.294157	-3.99073	6.60845e-05	0.000367415	-3.77757	Bacteroidetes	Bacteroidia	Chitinophagales	Chitinophagaceae	uncultured	B3472_uncultured	Not_predicted	Fer
KJ192091.1.1490	-41.1642	0.137617	-2.51852	0.0117919	0.037795	-4.44499	Bacteroidetes	Bacteroidia	Chitinophagales	Chitinophagaceae	#N/A	B13461_f_Chitinophagaceae	Not_predicted	Fer
KM030577.1.1458	-52.5041	0.137617	-4.73337	2.22191e-06	1.64901e-05	-3.36713	Bacteroidetes	Bacteroidia	Sphingobacteriales	Sphingobacteriaceae	Mucilaginibacter	B12591_Mucilaginibacter	Not_predicted	Fer
KM205499.1.1458	-56.1995	0.722041	-14.3395	2.00647e-46	8.96781e-44	47.5021	Bacteroidetes	Ignavibacteria	Ignavibacteriales	UA-50	#N/A	B1654_f_UA-50	Not_predicted	Fer
KP687205.1.1438	-67.2482	0.177084	-3.38715	0.000707472	0.00318145	-4.39125	Bacteroidetes	Bacteroidia	Flavobacteriales	Flavobacteriaceae	Flavobacterium	B8609_Flavobacterium	Not_predicted	Fer
KP745120.1.1454	-26.2371	0.484974	-3.8977	9.73999e-05	0.000517216	-2.76407	Bacteroidetes	Bacteroidia	Chitinophagales	Chitinophagaceae	#N/A	B3279_f_Chitinophagaceae	Not_predicted	Fer
KP899240.1.1287	-46.5494	0.122009	-4.19654	2.72087e-05	0.00016311	-3.64296	Bacteroidetes	Bacteroidia	Chitinophagales	Chitinophagaceae	Taibaiella	B15472_Taibaiella	Not_predicted	Fer
KR095274.1.1486	-55.6267	0.56009	-13.9588	4.28878e-44	1.72516e-41	43.9504	Bacteroidetes	Bacteroidia	Bacteroidales	Bacteroidetes vadinHA17	uncultured Cytophagales bacterium	B773_uncultured Cytophagales bacterium	Not_predicted	Fer
KY060007.1.1490	-57.8585	0.151651	-5.21609	1.84394e-07	1.65934e-06	-3.09079	Bacteroidetes	Bacteroidia	Chitinophagales	Chitinophagaceae	Terrimonas	B4013_Terrimonas	Not_predicted	Fer
LC106375.1.1486	-60.7039	0.159109	-5.47261	4.4829e-08	4.45797e-07	-2.93303	Bacteroidetes	Bacteroidia	Bacteroidales	SB-5	#N/A	B5002_f_SB-5	Not_predicted	Fer
LC124524.1.1445	-28.6556	0.224652	-3.36968	0.00075384	0.00337675	-3.66651	Bacteroidetes	Bacteroidia	Cytophagales	Microscillaceae	uncultured	B5146_uncultured	Not_predicted	Fer
952d9b17f4122393a56bf4e26b192167	-78.449	0.235549	-4.00079	6.33373e-05	0.000353363	-4.29577	BRC1	#N/A	#N/A	#N/A	#N/A	B8429_o_NA	Not_predicted	Fer
CU917555.1.1357	-33.5946	0.0880535	-3.02863	0.00245948	0.00984404	-4.12848	BRC1	uncultured bacterium	uncultured bacterium	uncultured bacterium	uncultured bacterium	B19083_uncultured bacterium	Not_predicted	Fer
f58adc6ba04168e2fd01004858fa00fc	-17.8415	0.420336	-5.92941	3.08569e-09	3.5565e-08	6.12222	BRC1	uncultured soil bacterium PBS-III-29	uncultured soil bacterium PBS-III-29	uncultured soil bacterium PBS-III-29	uncultured soil bacterium PBS-III-29	B6417_uncultured soil bacterium PBS-III-29	Not_predicted	Fer
714e3dc94f8eb0f3353275f8a947d9b2	-23.2617	0.193813	-3.05837	0.00222809	0.00901659	-3.70395	Chlamydiae	Chlamydiae	Chlamydiales	Parachlamydiaceae	Neochlamydia	B8718_Neochlamydia	Not_predicted	Fer
aac78a534fbb79d44dd95fd14acb67a1	-59.8366	0.157567	-3.01384	0.00258259	0.010306	-4.43786	Chlamydiae	Chlamydiae	Chlamydiales	Parachlamydiaceae	#N/A	B7884_f_Parachlamydiaceae	Not_predicted	Fer
fe203e2f2e324b555705781c9d2dbe14	-43.9565	0.10576	-4.1725	3.02437e-05	0.000179168	-3.56563	Chlamydiae	Chlamydiae	Chlamydiales	Parachlamydiaceae	#N/A	B17320_f_Parachlamydiaceae	Not_predicted	Fer
FPLS01021268.15.1377	-25.0797	0.56729	-3.81342	0.000137429	0.000711923	-2.78908	Chlamydiae	Chlamydiae	Chlamydiales	Parachlamydiaceae	uncultured	B2980_uncultured	Not_predicted	Fer
HG726046.1.1528	-50.7555	0.169681	-3.10534	0.00190302	0.0077992	-4.35175	Chlamydiae	Chlamydiae	Chlamydiales	Parachlamydiaceae	Candidatus Protochlamydia	B9438_Candidatus Protochlamydia	Not_predicted	Fer
0372557eb82b6cac684075d9c9850998	-12.0333	1.92911	-4.13616	3.54469e-05	0.000206645	0.468657	Chloroflexi	Anaerolineae	Anaerolineales	Anaerolineaceae	uncultured	B1171_uncultured	Not_predicted	Fer
038bbfd6469d45d44cd0c50b675204a8	-52.2602	0.137617	-2.63223	0.00848848	0.0287173	-4.47988	Chloroflexi	Anaerolineae	RBG-13-54-9	uncultured Caldilineaceae bacterium	uncultured Caldilineaceae bacterium	B13302_uncultured Caldilineaceae bacterium	Not_predicted	Fer
06157cad9967b0185bdeb0ee1405cefa	-16.522	1.34992	-4.35805	1.31818e-05	8.42314e-05	0.0333211	Chloroflexi	Anaerolineae	SBR1031	A4b	uncultured bacterium	B1844_uncultured bacterium	Not_predicted	Fer
06f9cff71fedb4bf120cc4651834d70a	-49.7837	0.123873	-4.46082	8.20496e-06	5.44179e-05	-3.52292	Chloroflexi	TK10	uncultured bacterium	uncultured bacterium	uncultured bacterium	B6431_uncultured bacterium	Not_predicted	Fer
0ec9a7b7bf8c8900a14bf150328e0376	-39.1048	0.140122	-5.01031	5.47618e-07	4.54184e-06	-2.10074	Chloroflexi	Anaerolineae	RBG-13-54-9	uncultured Anaerolineaceae bacterium	uncultured Anaerolineaceae bacterium	B2228_uncultured Anaerolineaceae bacterium	Not_predicted	Fer
18da40cf348b1265713ff2743e62bd40	-62.2551	0.149787	-5.90946	3.48279e-09	3.97998e-08	-2.46236	Chloroflexi	Anaerolineae	SBR1031	#N/A	#N/A	B4155_o_SBR1031	Not_predicted	Fer
1aaafa8a289203584f2baa6f4ea27a96	-18.4832	1.04487	-7.32612	2.45072e-13	5.06839e-12	13.975	Chloroflexi	Anaerolineae	Anaerolineales	Anaerolineaceae	Anaerolinea	B1357_Anaerolinea	Not_predicted	Fer
26cf05447f2e7fb05911ba820a52b4f4	-25.0072	0.509847	-5.12327	3.02813e-07	2.62231e-06	0.42064	Chloroflexi	Anaerolineae	SBR1031	#N/A	#N/A	B2758_o_SBR1031	Not_predicted	Fer
26fd333fabed59cc09d1f7be78d5d5a1	-38.62	0.0960953	-3.46051	0.000540173	0.00248752	-3.97393	Chloroflexi	Anaerolineae	Anaerolineales	Anaerolineaceae	uncultured	B3651_uncultured	Not_predicted	Fer
2aef567da267e9891140b4c35d169907	-63.6318	0.212728	-3.89314	9.92467e-05	0.000526328	-4.19597	Chloroflexi	Anaerolineae	SBR1031	uncultured Gemmatimonadetes bacterium	uncultured Gemmatimonadetes bacterium	B3424_uncultured Gemmatimonadetes bacterium	Not_predicted	Fer
2babd191d5230e0d7636c1af9857786e	-57.3836	0.415966	-7.62823	2.47638e-14	5.89423e-13	1.6935	Chloroflexi	Anaerolineae	RBG-13-54-9	uncultured Anaerolineaceae bacterium	uncultured Anaerolineaceae bacterium	B2494_uncultured Anaerolineaceae bacterium	Not_predicted	Fer
2c2fd12064d0221c35f108c2822a5713	-32.0254	1.00701	-7.57246	3.80612e-14	8.74863e-13	8.62305	Chloroflexi	Dehalococcoidia	Dehalococcoidales	uncultured	uncultured bacterium	B1569_uncultured bacterium	Not_predicted	Fer
2faff77a5ee2a9cb638addf7e716a148	-32.6286	0.282498	-4.55164	5.35128e-06	3.6733e-05	-2.27116	Chloroflexi	Anaerolineae	RBG-13-54-9	#N/A	#N/A	B2366_o_RBG-13-54-9	Not_predicted	Fer
366e214b59b032147bfdd2d5f29e8b35	-66.4411	0.159858	-6.3068	2.90272e-10	3.87913e-09	-2.15655	Chloroflexi	Anaerolineae	Anaerolineales	Anaerolineaceae	uncultured	B10610_uncultured	Not_predicted	Fer
3a16329e6ff8fb230f1a26785172bd61	-31.3404	0.0779821	-2.80823	0.00498583	0.0180992	-4.20667	Chloroflexi	#N/A	#N/A	#N/A	#N/A	B17792_o_NA	Not_predicted	Fer
3be05a344cc46725fecf9acc051ec535	-31.7937	0.0833333	-2.86628	0.00415719	0.0155919	-4.18354	Chloroflexi	Ktedonobacteria	Ktedonobacterales	Ktedonobacteraceae	uncultured	B19266_uncultured	Not_predicted	Fer
3c594a7ec1f22df7b863e3a9220c2971	-28.6863	0.10279	-3.67544	0.000238004	0.0011783	-3.30667	Chloroflexi	Chloroflexia	Chloroflexales	Chloroflexaceae	Chloronema	B17442_Chloronema	Not_predicted	Fer
3f2599ebe3aba891bace18cec0dc7979	-56.8533	0.344852	-11.2848	1.87855e-29	1.97145e-27	19.7796	Chloroflexi	Anaerolineae	Anaerolineales	Anaerolineaceae	uncultured	B853_uncultured	Not_predicted	Fer
4171c30ba983dc6a3d0a8f91b3483c65	-20.1631	0.442162	-6.74094	1.61262e-11	2.61037e-10	9.46395	Chloroflexi	Ktedonobacteria	C0119	uncultured bacterium	uncultured bacterium	B1207_uncultured bacterium	Not_predicted	Fer
439df475024948b363684253ce6bb390	-51.1851	0.12736	-4.58639	4.53452e-06	3.17219e-05	-3.45825	Chloroflexi	Anaerolineae	SBR1031	metagenome	metagenome	B5198_metagenome	Not_predicted	Fer
4d424d33dc4b1fcc66806429cd7c85e3	-61.7406	0.323189	-4.21037	2.55965e-05	0.000154135	-4.01716	Chloroflexi	Anaerolineae	Anaerolineales	Anaerolineaceae	uncultured	B5008_uncultured	Not_predicted	Fer
4f54cae07d6bb25fd61adbb52bcbf61d	-61.9825	0.445378	-8.6129	7.5946e-18	2.75219e-16	4.02469	Chloroflexi	Chloroflexia	Chloroflexales	Roseiflexaceae	uncultured	B5170_uncultured	Not_predicted	Fer
4fed88c7484eaaa119c6a47dcd8e33d9	-57.507	0.15073	-5.1844	2.18626e-07	1.94133e-06	-3.10975	Chloroflexi	JG30-KF-CM66	#N/A	#N/A	#N/A	B11705_o_NA	Not_predicted	Fer
51b4ff8eb383be1569b037851201f580	-49.6746	0.362092	-8.73397	2.63093e-18	1.0225e-16	7.82619	Chloroflexi	Anaerolineae	SJA-15	uncultured Chloroflexi bacterium	uncultured Chloroflexi bacterium	B5339_uncultured Chloroflexi bacterium	Not_predicted	Fer
51ded1fd2c76209e86a6e91ec5e19075	-60.1158	0.157567	-5.41959	6.03635e-08	5.82283e-07	-2.96626	Chloroflexi	Anaerolineae	SBR1031	#N/A	#N/A	B10867_o_SBR1031	Not_predicted	Fer
5248364bc653116d760b7d746e5cfabb	-32.3018	1.76873	-8.61521	7.44311e-18	2.70949e-16	14.7793	Chloroflexi	Anaerolineae	Anaerolineales	Anaerolineaceae	RBG-16-58-14	B791_RBG-16-58-14	Not_predicted	Fer
55b328efc5614b0897b5eb9b29fe70ca	-46.9304	0.596133	-8.27403	1.36785e-16	4.34347e-15	6.57228	Chloroflexi	Anaerolineae	Anaerolineales	Anaerolineaceae	uncultured	B2263_uncultured	Not_predicted	Fer
57ab5bc97bb50889808e4f5586918086	-67.2318	0.167288	-6.02425	1.72596e-09	2.04799e-08	-2.58986	Chloroflexi	Anaerolineae	Anaerolineales	Anaerolineaceae	uncultured	B3818_uncultured	Not_predicted	Fer
5853406af0ae6ce69392c2dc033c5e20	-50.3978	0.440918	-7.32876	2.40312e-13	4.99564e-12	2.04839	Chloroflexi	Anaerolineae	SJA-15	metagenome	metagenome	B2615_metagenome	Not_predicted	Fer
5b8466cef8526c33619cd7bd40eb73e6	-36.8165	0.341261	-4.60804	4.08753e-06	2.88711e-05	-2.57913	Chloroflexi	NLS2-31	uncultured bacterium	uncultured bacterium	uncultured bacterium	B3803_uncultured bacterium	Not_predicted	Fer
5c08284c7dcf64f1d1a9fe75d0f585bd	-13.1495	0.699438	-3.40649	0.000659218	0.00298615	-1.95555	Chloroflexi	Anaerolineae	RBG-13-54-9	uncultured Caldilineaceae bacterium	uncultured Caldilineaceae bacterium	B1443_uncultured Caldilineaceae bacterium	Not_predicted	Fer
619e384235b7937fef138a0ecdd870ea	-47.1904	0.113541	-4.47947	7.5206e-06	5.01269e-05	-3.39831	Chloroflexi	TK10	uncultured Chloroflexus sp.	uncultured Chloroflexus sp.	uncultured Chloroflexus sp.	B16288_uncultured Chloroflexus sp.	Not_predicted	Fer
62275efc2bb3add994659a217580f237	-57.197	0.137617	-5.42932	5.71661e-08	5.56781e-07	-2.80535	Chloroflexi	Ktedonobacteria	C0119	uncultured bacterium	uncultured bacterium	B13352_uncultured bacterium	Not_predicted	Fer
65db3dc023dcd090c9ea04cafe55844b	-86.5309	0.226803	-7.80097	6.41527e-15	1.65419e-13	-1.15479	Chloroflexi	Anaerolineae	SJA-15	uncultured Chloroflexi bacterium	uncultured Chloroflexi bacterium	B2332_uncultured Chloroflexi bacterium	Not_predicted	Fer
664546340e25eeb18d494ad081e8d3c8	-14.9083	2.58953	-5.88591	4.01598e-09	4.55691e-08	7.14368	Chloroflexi	Anaerolineae	RBG-13-54-9	uncultured eubacterium WCHB1-50	uncultured eubacterium WCHB1-50	B425_uncultured eubacterium WCHB1-50	Not_predicted	Fer
6819d9501557d6bac4301f6bad1673eb	-50.3918	0.13208	-4.54295	5.57673e-06	3.81828e-05	-3.46876	Chloroflexi	Anaerolineae	Ardenticatenales	uncultured	uncultured prokaryote	B10623_uncultured prokaryote	Not_predicted	Fer
6b8bf8e0b815e138efd2c3b9b19062fa	-40.9144	0.296456	-7.11234	1.17581e-12	2.24156e-11	3.451	Chloroflexi	Anaerolineae	SBR1031	A4b	uncultured bacterium	B6677_uncultured bacterium	Not_predicted	Fer
6d48e0307c36b439a0d7aa3d2a8ce464	-66.8045	0.153432	-2.5029	0.0123252	0.0393011	-4.53742	Chloroflexi	Dehalococcoidia	#N/A	#N/A	#N/A	B5986_o_NA	Not_predicted	Fer
71c8bbfe95cfb3620f03ba468f459b03	-38.62	0.0960953	-3.46051	0.000540173	0.00248752	-3.97393	Chloroflexi	TK10	#N/A	#N/A	#N/A	B11712_o_NA	Not_predicted	Fer
72f131a5d4f36b51f9ddf2210c2a0ad7	-66.421	0.152551	-2.48853	0.0128345	0.0405872	-4.53821	Chloroflexi	KD4-96	uncultured prokaryote	uncultured prokaryote	uncultured prokaryote	B7411_uncultured prokaryote	Not_predicted	Fer
7d0cc47c0f88ce2b1c5d4afba208dc99	-22.0974	0.441682	-3.22754	0.00125041	0.00534512	-3.41652	Chloroflexi	Anaerolineae	Anaerolineales	Anaerolineaceae	uncultured	B4001_uncultured	Not_predicted	Fer
807e64803c7eb648737a8adffa62007e	-61.1523	0.195678	-5.21452	1.85961e-07	1.67157e-06	-3.23329	Chloroflexi	TK10	Clostridiales bacterium PH28_bin88	Clostridiales bacterium PH28_bin88	Clostridiales bacterium PH28_bin88	B8663_Clostridiales bacterium PH28_bin88	Not_predicted	Fer
849997a0324d1f84d2a51c403c6b735d	-85.5903	0.196578	-3.20673	0.00134446	0.00571378	-4.49329	Chloroflexi	Anaerolineae	SBR1031	anaerobic bacterium MO-CFX2	anaerobic bacterium MO-CFX2	B1667_anaerobic bacterium MO-CFX2	Not_predicted	Fer
8aea2c96910d0ee41e8ef58eca19a049	-49.1488	0.317323	-5.15127	2.60964e-07	2.27749e-06	-2.69272	Chloroflexi	Anaerolineae	Caldilineales	Caldilineaceae	uncultured	B7414_uncultured	Not_predicted	Fer
8dbb8fad87e2e0acb5ed2e67279ff1d6	-20.8104	0.845113	-5.30386	1.14471e-07	1.06465e-06	2.21687	Chloroflexi	Anaerolineae	SJA-15	uncultured Chloroflexi bacterium	uncultured Chloroflexi bacterium	B1969_uncultured Chloroflexi bacterium	Not_predicted	Fer
98e73ce359b8a6a4f49b1a9399ad7fa8	-27.8166	0.408729	-5.17998	2.23867e-07	1.98349e-06	-0.0283206	Chloroflexi	Anaerolineae	Ardenticatenales	uncultured	uncultured bacterium	B6129_uncultured bacterium	Not_predicted	Fer
9b6ee0044a4781127fef7d8b3859ab0f	-31.0085	0.111111	-3.97298	7.12061e-05	0.000392365	-3.06998	Chloroflexi	Anaerolineae	SBR1031	#N/A	#N/A	B11976_o_SBR1031	Not_predicted	Fer
9f653e5e83de1fdbd1950d8959c65ba5	-20.0047	0.167288	-2.589	0.00963182	0.0320463	-4.0055	Chloroflexi	Ktedonobacteria	Ktedonobacterales	uncultured bacterium	uncultured bacterium	B1312_uncultured bacterium	Not_predicted	Fer
a297dc48da1f0486283806a8f3c47773	-36.047	1.59429	-9.58287	1.04061e-21	5.29856e-20	19.3934	Chloroflexi	Anaerolineae	SBR1031	uncultured Gemmatimonadetes bacterium	uncultured Gemmatimonadetes bacterium	B281_uncultured Gemmatimonadetes bacterium	Not_predicted	Fer
a383155f59a40cf98ebe20ff0c841826	-49.2123	0.464308	-11.8493	2.72036e-32	3.6362e-30	28.8598	Chloroflexi	#N/A	#N/A	#N/A	#N/A	B4220_o_NA	Not_predicted	Fer
a50cc7d9baed42101a7dc616f7f5a293	-50.5239	0.248566	-5.19952	2.01593e-07	1.79404e-06	-2.7147	Chloroflexi	Anaerolineae	SBR1031	#N/A	#N/A	B2962_o_SBR1031	Not_predicted	Fer
a80cf4ea8ed94f0c97a811ec506117aa	-18.7031	0.262304	-2.65785	0.00786979	0.0269989	-3.87256	Chloroflexi	Anaerolineae	ADurb.Bin180	uncultured bacterium	uncultured bacterium	B6162_uncultured bacterium	Not_predicted	Fer
AB252958.1.1470	-30.0026	0.184552	-4.13853	3.50843e-05	0.000204828	-2.72937	Chloroflexi	Anaerolineae	RBG-13-54-9	uncultured planctomycete	uncultured planctomycete	B6131_uncultured planctomycete	Not_predicted	Fer
AB486441.1.1322	-15.49	0.690341	-5.56916	2.58963e-08	2.65734e-07	5.29778	Chloroflexi	Anaerolineae	Ardenticatenales	uncultured	uncultured archaeon	B1300_uncultured archaeon	Not_predicted	Fer
AB630560.1.1424	-24.5645	0.573304	-4.84046	1.30419e-06	1.01179e-05	-0.347561	Chloroflexi	Anaerolineae	Anaerolineales	Anaerolineaceae	Anaerolinea	B1277_Anaerolinea	Not_predicted	Fer
ab6bc2509bae88c67ad73260999f1c89	-80.4025	0.211724	-4.0497	5.14585e-05	0.000290108	-4.29515	Chloroflexi	Anaerolineae	Anaerolineales	Anaerolineaceae	Anaerolinea	B3130_Anaerolinea	Not_predicted	Fer
ab8c906eb400152fcb53b05b5b9279f6	-9.38617	1.31067	-2.73721	0.00620132	0.0219875	-2.86534	Chloroflexi	Anaerolineae	RBG-13-54-9	uncultured prokaryote	uncultured prokaryote	B402_uncultured prokaryote	Not_predicted	Fer
ac4d6e5b81c42c530caa9ddde574ad37	-33.9205	0.215414	-4.65307	3.28933e-06	2.36274e-05	-2.22164	Chloroflexi	Anaerolineae	Ardenticatenales	uncultured	uncultured Litorilinea sp.	B9212_uncultured Litorilinea sp.	Not_predicted	Fer
adfd253e8325a1620b579e55542918a1	-49.6864	0.178039	-6.36609	1.97734e-10	2.71926e-09	-0.496511	Chloroflexi	Anaerolineae	Anaerolineales	Anaerolineaceae	uncultured	B8437_uncultured	Not_predicted	Fer
AM935637.1.1320	-36.9108	0.359351	-5.89115	3.89099e-09	4.42759e-08	0.258645	Chloroflexi	Anaerolineae	Anaerolineales	Anaerolineaceae	Longilinea	B5202_Longilinea	Not_predicted	Fer
AM935671.1.1324	-39.0135	0.594336	-6.81066	9.96518e-12	1.66673e-10	2.80833	Chloroflexi	Anaerolineae	SBR1031	anaerobic bacterium MO-CFX2	anaerobic bacterium MO-CFX2	B1197_anaerobic bacterium MO-CFX2	Not_predicted	Fer
AM935724.1.1304	-26.3311	0.42613	-8.85114	9.30346e-19	3.83827e-17	20.1097	Chloroflexi	JG30-KF-CM66	metagenome	metagenome	metagenome	B1172_metagenome	Not_predicted	Fer
AM935790.1.1315	-38.4056	0.137617	-4.92073	8.68462e-07	6.89031e-06	-2.19328	Chloroflexi	OLB14	uncultured Chloroflexi bacterium	uncultured Chloroflexi bacterium	uncultured Chloroflexi bacterium	B8573_uncultured Chloroflexi bacterium	Not_predicted	Fer
AY214200.1.1504	-32.6924	0.39805	-7.12838	1.04695e-12	2.015e-11	6.09884	Chloroflexi	Anaerolineae	ADurb.Bin180	#N/A	#N/A	B7100_o_ADurb.Bin180	Not_predicted	Fer
AY921524.1.1402	-50.3726	0.496012	-7.30732	2.81811e-13	5.7836e-12	1.98488	Chloroflexi	Chloroflexia	Chloroflexales	Roseiflexaceae	uncultured	B1608_uncultured	Not_predicted	Fer
AY921805.1.1340	-64.2878	0.168502	-5.79571	6.89626e-09	7.61048e-08	-2.72355	Chloroflexi	TK10	uncultured Chloroflexus sp.	uncultured Chloroflexus sp.	uncultured Chloroflexus sp.	B9552_uncultured Chloroflexus sp.	Not_predicted	Fer
AY953203.1.1358	-16.9638	0.155964	-2.59961	0.00933914	0.0311886	-3.83175	Chloroflexi	Anaerolineae	Anaerolineales	Anaerolineaceae	uncultured	B17571_uncultured	Not_predicted	Fer
b1ee45749261aa58b6199fcabda70975	-55.3587	0.145776	-2.7883	0.00530315	0.0191232	-4.46338	Chloroflexi	Anaerolineae	RBG-13-54-9	uncultured bacterium UASB_TL14	uncultured bacterium UASB_TL14	B9291_uncultured bacterium UASB_TL14	Not_predicted	Fer
b7a1ab1de01921ad69018a69e1c30cbc	-40.7712	0.136303	-2.49447	0.0126217	0.0400759	-4.4484	Chloroflexi	Chloroflexia	Thermomicrobiales	JG30-KF-CM45	metagenome	B10556_metagenome	Not_predicted	Fer
bd92c33735e5cacf1c686d78fb24ee6f	-53.1162	0.215599	-3.91987	8.88662e-05	0.000476937	-4.0211	Chloroflexi	Dehalococcoidia	FW22	uncultured Chloroflexi bacterium	uncultured Chloroflexi bacterium	B3882_uncultured Chloroflexi bacterium	Not_predicted	Fer
bed7036c6dbe96884cc3d69a35e5f8bb	-27.3952	0.0718045	-2.46974	0.0135285	0.0424308	-4.30529	Chloroflexi	Anaerolineae	uncultured	uncultured organism	uncultured organism	B18668_uncultured organism	Not_predicted	Fer
c05504cec90e6b7627b791d15610d142	-42.3916	0.111111	-3.82171	0.000132895	0.000689766	-3.81588	Chloroflexi	Anaerolineae	SBR1031	uncultured soil bacterium	uncultured soil bacterium	B6382_uncultured soil bacterium	Not_predicted	Fer
c1e6eacbfbad630fa5c3124a00cc0fd5	-33.7118	0.277147	-4.18965	2.8047e-05	0.000167886	-2.96642	Chloroflexi	Anaerolineae	Anaerolineales	Anaerolineaceae	uncultured	B3459_uncultured	Not_predicted	Fer
c395fcbd76a2f438327cf4a516a76d10	-21.763	0.0779821	-2.78839	0.00530164	0.0191232	-3.90304	Chloroflexi	Anaerolineae	SBR1031	uncultured bacterium	uncultured bacterium	B19920_uncultured bacterium	Not_predicted	Fer
c4e475f4205a37d1925b6c2210c4e004	-28.4861	0.158346	-4.5377	5.71728e-06	3.90123e-05	-1.7926	Chloroflexi	Anaerolineae	Anaerolineales	Anaerolineaceae	uncultured	B6683_uncultured	Not_predicted	Fer
d11d4b74b29000cc8bde96cf7b9f0756	-60.1981	0.149787	-5.394	6.96165e-08	6.67539e-07	-2.99947	Chloroflexi	Anaerolineae	SBR1031	uncultured Gemmatimonadetes bacterium	uncultured Gemmatimonadetes bacterium	B10477_uncultured Gemmatimonadetes bacterium	Not_predicted	Fer
d3293ff07c04618339d10843c809b775	-49.8148	0.130568	-4.49093	7.12738e-06	4.78629e-05	-3.4958	Chloroflexi	SHA-26	uncultured Dehalococcoides sp.	uncultured Dehalococcoides sp.	uncultured Dehalococcoides sp.	B7021_uncultured Dehalococcoides sp.	Not_predicted	Fer
d6798b48271a29c7f19c515780e03b74	-73.7214	0.19413	-3.71318	0.000205172	0.00102906	-4.3461	Chloroflexi	Anaerolineae	Anaerolineales	Anaerolineaceae	#N/A	B1603_f_Anaerolineaceae	Not_predicted	Fer
da537cb96b462ec66b518f99f786bf49	-31.6174	0.718995	-6.51511	7.42052e-11	1.08345e-09	3.73139	Chloroflexi	Anaerolineae	SBR1031	uncultured Gemmatimonadetes bacterium	uncultured Gemmatimonadetes bacterium	B1930_uncultured Gemmatimonadetes bacterium	Not_predicted	Fer
da98d0a780700228cf7926c047990629	-54.1867	0.306694	-7.22976	4.99673e-13	9.97487e-12	1.07325	Chloroflexi	Ktedonobacteria	C0119	uncultured soil bacterium	uncultured soil bacterium	B1660_uncultured soil bacterium	Not_predicted	Fer
de822195a018f7e9c42f4e67eac0049c	-48.5236	0.273833	-4.15308	3.29264e-05	0.000193777	-3.74578	Chloroflexi	KD4-96	uncultured Longilinea sp.	uncultured Longilinea sp.	uncultured Longilinea sp.	B10131_uncultured Longilinea sp.	Not_predicted	Fer
defd8c9e68b8b3f7705f97ffb56840f4	-57.1233	0.213901	-6.55655	5.62889e-11	8.37051e-10	-0.948823	Chloroflexi	TK10	uncultured bacterium	uncultured bacterium	uncultured bacterium	B13968_uncultured bacterium	Not_predicted	Fer
dfff9930ac8d08d7c82decb06ab65717	-26.807	0.064498	-2.54461	0.0109467	0.0355537	-4.25453	Chloroflexi	Dehalococcoidia	#N/A	#N/A	#N/A	B21087_o_NA	Not_predicted	Fer
DQ125834.1.1450	-20.8113	0.637362	-6.78883	1.15923e-11	1.90716e-10	9.4252	Chloroflexi	Ktedonobacteria	Ktedonobacterales	JG30-KF-AS9	uncultured bacterium	B3066_uncultured bacterium	Not_predicted	Fer
e19120dda49c92d79a4662b4fbca3f1f	-26.4532	0.302125	-3.9937	6.52617e-05	0.000363092	-2.61948	Chloroflexi	TK10	uncultured bacterium	uncultured bacterium	uncultured bacterium	B4942_uncultured bacterium	Not_predicted	Fer
e1985cd5df6ef44b4d3df94fdcbeb708	-31.7937	0.0833333	-2.86628	0.00415719	0.0155919	-4.18354	Chloroflexi	Chloroflexia	Chloroflexales	Roseiflexaceae	uncultured	B19500_uncultured	Not_predicted	Fer
e252041d60f1c9b5370e162d08fbbcf9	-10.6676	0.943167	-4.00571	6.20335e-05	0.000347776	0.373504	Chloroflexi	Anaerolineae	SBR1031	#N/A	#N/A	B2837_o_SBR1031	Not_predicted	Fer
e36598dac32f614acaa1cae4b9295632	-14.6508	0.333616	-2.67722	0.00742918	0.0257176	-3.56119	Chloroflexi	Anaerolineae	SBR1031	uncultured Gemmatimonadetes bacterium	uncultured Gemmatimonadetes bacterium	B2281_uncultured Gemmatimonadetes bacterium	Not_predicted	Fer
e4f8524c5f2ae5418c3c1c00073a447d	-49.6039	0.837869	-9.49318	2.46186e-21	1.22257e-19	11.8236	Chloroflexi	Anaerolineae	SBR1031	#N/A	#N/A	B558_o_SBR1031	Not_predicted	Fer
e6cabb20959a4c0bc2e6ead219b86ad9	-27.0158	0.649868	-5.14411	2.71092e-07	2.36032e-06	0.0336128	Chloroflexi	Anaerolineae	SBR1031	uncultured bacterium	uncultured bacterium	B2457_uncultured bacterium	Not_predicted	Fer
e7c724c3c94f263b4be0701ba51114d8	-39.3189	0.149787	-4.61175	4.01539e-06	2.83865e-05	-2.77615	Chloroflexi	Anaerolineae	Anaerolineales	Anaerolineaceae	Ornatilinea	B11639_Ornatilinea	Not_predicted	Fer
eb6615f1dcd3a55631dbb6f56f34e7cf	-75.3342	0.173023	-2.82247	0.00476975	0.017458	-4.51873	Chloroflexi	Anaerolineae	Anaerolineales	Anaerolineaceae	RBG-16-58-14	B9030_RBG-16-58-14	Not_predicted	Fer
ec692f2ff873cf8042bb5e47a3b59364	-19.0675	1.39812	-6.96439	3.3911e-12	6.04909e-11	11.3481	Chloroflexi	Anaerolineae	Anaerolineales	Anaerolineaceae	uncultured	B729_uncultured	Not_predicted	Fer
eec197af34863d8ca4bf9706bddffe0e	-43.9565	0.10576	-4.1725	3.02437e-05	0.000179168	-3.56563	Chloroflexi	Dehalococcoidia	#N/A	#N/A	#N/A	B5604_o_NA	Not_predicted	Fer
EF018430.1.1323	-26.3584	1.20839	-6.5585	5.55562e-11	8.27684e-10	5.76331	Chloroflexi	JG30-KF-CM66	metagenome	metagenome	metagenome	B1205_metagenome	Not_predicted	Fer
EF515717.1.1353	-56.4986	0.859047	-11.6712	2.21278e-31	2.78153e-29	22.7793	Chloroflexi	Anaerolineae	Anaerolineales	Anaerolineaceae	uncultured	B2132_uncultured	Not_predicted	Fer
EF589965.1.1348	-14.4901	1.43926	-3.69149	0.000223481	0.00111395	-1.48019	Chloroflexi	Anaerolineae	Anaerolineales	Anaerolineaceae	Anaerolinea	B269_Anaerolinea	Not_predicted	Fer
EF590008.1.1339	-31.0669	0.387717	-5.091	3.59112e-07	3.0833e-06	-0.87915	Chloroflexi	TK10	#N/A	#N/A	#N/A	B3020_o_NA	Not_predicted	Fer
EU134137.1.1332	-39.1048	0.140122	-5.01031	5.47618e-07	4.54184e-06	-2.10074	Chloroflexi	Anaerolineae	Ardenticatenales	uncultured	uncultured prokaryote	B10391_uncultured prokaryote	Not_predicted	Fer
EU875524.1.1376	-43.8261	0.472532	-9.99413	1.81439e-23	1.07329e-21	17.7835	Chloroflexi	Anaerolineae	Caldilineales	Caldilineaceae	uncultured	B2079_uncultured	Not_predicted	Fer
f5107764e8ff2f6800a58236fc36e396	-77.3117	0.177564	-2.89656	0.0037765	0.014399	-4.51408	Chloroflexi	Anaerolineae	SBR1031	uncultured Gemmatimonadetes bacterium	uncultured Gemmatimonadetes bacterium	B3704_uncultured Gemmatimonadetes bacterium	Not_predicted	Fer
f5877a186c4a60581ff14b8cc809d140	-76.4658	0.273919	-4.29567	1.74915e-05	0.000109	-4.17626	Chloroflexi	Chloroflexia	Chloroflexales	Roseiflexaceae	uncultured	B8974_uncultured	Not_predicted	Fer
ff5b3fc46ab191e9e9df99feab537505	-23.4613	0.20855	-3.45463	0.000552086	0.00253947	-3.2071	Chloroflexi	SHA-26	uncultured soil bacterium	uncultured soil bacterium	uncultured soil bacterium	B4625_uncultured soil bacterium	Not_predicted	Fer
FJ415627.1.1200	-55.1869	0.197748	-7.07085	1.58597e-12	2.96035e-11	0.488439	Chloroflexi	Anaerolineae	Anaerolineales	Anaerolineaceae	Anaerolinea	B1069_Anaerolinea	Not_predicted	Fer
FJ802196.1.1229	-77.351	0.269697	-4.59103	4.43492e-06	3.11335e-05	-4.06021	Chloroflexi	Anaerolineae	Anaerolineales	Anaerolineaceae	uncultured	B3070_uncultured	Not_predicted	Fer
FJ946564.1.1290	-8.48189	1.23074	-3.40209	0.000669923	0.00303294	-1.06406	Chloroflexi	Anaerolineae	SBR1031	A4b	wastewater metagenome	B1290_wastewater metagenome	Not_predicted	Fer
FPLL01005208.15.1292	-63.0524	0.166036	-3.17581	0.00149624	0.00627594	-4.4183	Chloroflexi	OLB14	metagenome	metagenome	metagenome	B2529_metagenome	Not_predicted	Fer
FPLP01009365.1.1470	-32.1476	0.151651	-4.20343	2.63933e-05	0.000158814	-2.81847	Chloroflexi	Anaerolineae	RBG-13-54-9	metagenome	metagenome	B14366_metagenome	Not_predicted	Fer
FPLS01002599.10.1460	-54.5359	0.143609	-2.74685	0.0060219	0.0213891	-4.46785	Chloroflexi	JG30-KF-CM66	metagenome	metagenome	metagenome	B6995_metagenome	Not_predicted	Fer
FPLS01015944.12.1477	-14.1732	0.408463	-4.70708	2.52814e-06	1.85574e-05	1.96776	Chloroflexi	TK10	#N/A	#N/A	#N/A	B2585_o_NA	Not_predicted	Fer
FPLS01039234.11.1486	-44.1925	0.115831	-3.98406	6.79659e-05	0.000376056	-3.74297	Chloroflexi	Anaerolineae	SBR1031	A4b	metagenome	B10229_metagenome	Not_predicted	Fer
FPLS01042002.15.1489	-61.2703	0.160593	-5.52367	3.35749e-08	3.40618e-07	-2.90072	Chloroflexi	Dehalococcoidia	S085	metagenome	metagenome	B10582_metagenome	Not_predicted	Fer
GQ181975.1.1363	-20.8676	0.16408	-2.64382	0.00820337	0.0278535	-3.99525	Chloroflexi	Anaerolineae	Anaerolineales	Anaerolineaceae	#N/A	B16181_f_Anaerolineaceae	Not_predicted	Fer
GQ397052.1.1443	-46.2902	0.891664	-8.05232	8.53298e-16	2.44298e-14	5.78334	Chloroflexi	Chloroflexia	Chloroflexales	Roseiflexaceae	uncultured	B789_uncultured	Not_predicted	Fer
GU127772.1.1438	-43.6434	0.334907	-4.28578	1.82875e-05	0.000113609	-3.43927	Chloroflexi	Anaerolineae	Anaerolineales	Anaerolineaceae	uncultured	B1718_uncultured	Not_predicted	Fer
HG917221.1.1470	-36.4384	0.130568	-4.66868	3.04922e-06	2.21199e-05	-2.44467	Chloroflexi	Chloroflexia	Thermomicrobiales	JG30-KF-CM45	#N/A	B11323_f_JG30-KF-CM45	Not_predicted	Fer
HM185973.1.1335	-27.4256	0.196578	-4.99307	5.98818e-07	4.94609e-06	-0.488056	Chloroflexi	JG30-KF-CM66	uncultured bacterium	uncultured bacterium	uncultured bacterium	B6195_uncultured bacterium	Not_predicted	Fer
HQ397138.1.1450	-34.9066	0.287218	-7.08637	1.41833e-12	2.67225e-11	5.12904	Chloroflexi	JG30-KF-CM66	uncultured bacterium	uncultured bacterium	uncultured bacterium	B6583_uncultured bacterium	Not_predicted	Fer
HQ697384.1.1469	-25.8573	0.738781	-4.22008	2.4519e-05	0.000149097	-2.11169	Chloroflexi	KD4-96	#N/A	#N/A	#N/A	B321_o_NA	Not_predicted	Fer
JF199003.1.1298	-24.2294	0.336565	-3.49434	0.000476175	0.00222335	-3.21434	Chloroflexi	Chloroflexia	Chloroflexales	Roseiflexaceae	uncultured	B4501_uncultured	Not_predicted	Fer
JF231287.1.1300	-52.3647	0.187636	-6.70925	2.00374e-11	3.18579e-10	-0.0298221	Chloroflexi	Chloroflexia	Chloroflexales	Roseiflexaceae	uncultured	B5017_uncultured	Not_predicted	Fer
JQ990328.1.1485	-48.3653	0.12736	-2.43605	0.0148563	0.0460398	-4.49927	Chloroflexi	Dehalococcoidia	Dehalococcoidales	Dehalococcoidaceae	Dehalogenimonas	B10244_Dehalogenimonas	Not_predicted	Fer
JX079324.1.1460	-73.7881	0.26149	-7.51428	5.94065e-14	1.32757e-12	-0.654017	Chloroflexi	Anaerolineae	Ardenticatenales	uncultured	uncultured archaeon	B10842_uncultured archaeon	Not_predicted	Fer
JX098431.1.1330	-21.2168	0.361713	-4.00527	6.21492e-05	0.000348183	-1.90795	Chloroflexi	JG30-KF-CM66	uncultured bacterium	uncultured bacterium	uncultured bacterium	B2260_uncultured bacterium	Not_predicted	Fer
JX504897.1.1429	-12.2236	3.25072	-5.06598	4.09581e-07	3.48686e-06	4.1528	Chloroflexi	Anaerolineae	Anaerolineales	Anaerolineaceae	uncultured	B160_uncultured	Not_predicted	Fer
JX504915.1.1424	-9.39522	0.711309	-2.65993	0.0078213	0.0268669	-3.02004	Chloroflexi	Gitt-GS-136	uncultured Caldilinea sp.	uncultured Caldilinea sp.	uncultured Caldilinea sp.	B1741_uncultured Caldilinea sp.	Not_predicted	Fer
JX505393.1.1421	-35.8907	0.337966	-5.2455	1.57305e-07	1.43158e-06	-1.23787	Chloroflexi	SHA-26	uncultured Anaerolineaceae bacterium	uncultured Anaerolineaceae bacterium	uncultured Anaerolineaceae bacterium	B6120_uncultured Anaerolineaceae bacterium	Not_predicted	Fer
KC172237.1.1459	-31.6865	0.113541	-4.05985	4.92743e-05	0.000279754	-2.9974	Chloroflexi	Anaerolineae	SBR1031	A4b	uncultured Anaerolineaceae bacterium	B16461_uncultured Anaerolineaceae bacterium	Not_predicted	Fer
KC620792.1.1501	-52.0497	0.186507	-6.66888	2.63865e-11	4.08229e-10	-0.0859916	Chloroflexi	Anaerolineae	Caldilineales	Caldilineaceae	uncultured	B6804_uncultured	Not_predicted	Fer
KJ191935.1.1448	-34.0568	0.250621	-6.15984	7.4078e-10	9.34103e-09	1.71281	Chloroflexi	TK10	uncultured Chloroflexi bacterium	uncultured Chloroflexi bacterium	uncultured Chloroflexi bacterium	B8813_uncultured Chloroflexi bacterium	Not_predicted	Fer
KM205527.1.1424	-10.7824	1.54746	-2.9296	0.00339746	0.013128	-2.6612	Chloroflexi	Anaerolineae	SBR1031	uncultured soil bacterium	uncultured soil bacterium	B1682_uncultured soil bacterium	Not_predicted	Fer
KX753053.1.1460	-21.7946	0.551739	-4.77437	1.8143e-06	1.36924e-05	0.0701922	Chloroflexi	Chloroflexia	Thermomicrobiales	JG30-KF-CM45	metagenome	B3267_metagenome	Not_predicted	Fer
KX753099.1.1468	-20.6233	1.2836	-6.94769	3.81663e-12	6.76318e-11	10.4513	Chloroflexi	AD3	uncultured Thermoflavimicrobium sp.	uncultured Thermoflavimicrobium sp.	uncultured Thermoflavimicrobium sp.	B142_uncultured Thermoflavimicrobium sp.	Not_predicted	Fer
LN573042.1.1341	-39.7629	0.14248	-5.09463	3.52308e-07	3.02812e-06	-2.01213	Chloroflexi	JG30-KF-CM66	uncultured bacterium	uncultured bacterium	uncultured bacterium	B12859_uncultured bacterium	Not_predicted	Fer
a7f53615ffbb30cf8600b0dc62c616cb	-61.8538	0.148821	-5.87136	4.38432e-09	4.95391e-08	-2.49064	Cyanobacteria	Oxyphotobacteria	Oxyphotobacteria Incertae Sedis	Unknown Family	Leptolyngbya ANT.L52.2	B9090_Leptolyngbya ANT.L52.2	Not_predicted	Fer
AB488124.1.1331	-50.2788	0.325728	-7.51048	6.11528e-14	1.36281e-12	2.67229	Cyanobacteria	Oxyphotobacteria	Oxyphotobacteria Incertae Sedis	Unknown Family	#N/A	B5801_f_Unknown Family	Not_predicted	Fer
ad8b783b947b7dc7c75e6db8c5ddb3c9	-41.3105	0.10279	-3.70159	0.000214771	0.0010728	-3.87565	Cyanobacteria	Melainabacteria	Gastranaerophilales	#N/A	#N/A	B17565_o_Gastranaerophilales	Not_predicted	Fer
AJ630428.1.1462	-29.5151	0.10576	-3.78163	0.000156215	0.000799967	-3.22431	Cyanobacteria	Oxyphotobacteria	Nostocales	Nostocaceae	#N/A	B3995_f_Nostocaceae	Not_predicted	Fer
CP001287.2484826.2486304	-11.4405	0.808105	-2.50271	0.0123317	0.0393062	-3.5213	Cyanobacteria	Oxyphotobacteria	Nostocales	Microcystaceae	Cyanothece PCC-8801	B2747_Cyanothece PCC-8801	Not_predicted	Fer
CZCU01000149.106801.108279	-47.2606	0.123873	-4.26066	2.04669e-05	0.000126045	-3.61175	Cyanobacteria	Oxyphotobacteria	Nostocales	Phormidiaceae	Planktothrix NIVA-CYA 15	B9022_Planktothrix NIVA-CYA 15	Not_predicted	Fer
DQ185242.1.1394	-26.818	0.0960953	-3.43606	0.00059133	0.00270298	-3.48374	Cyanobacteria	Oxyphotobacteria	Nostocales	Nostocaceae	Nostoc PCC-7524	B18326_Nostoc PCC-7524	Not_predicted	Fer
DQ431004.1.1441	-47.4463	0.500645	-6.67441	2.54126e-11	3.9468e-10	0.623782	Cyanobacteria	Oxyphotobacteria	Leptolyngbyales	Leptolyngbyaceae	JSC-12	B4275_JSC-12	Not_predicted	Fer
fabc322cea6613cd639aaa598f66d358	-53.614	0.128996	-5.08922	3.62495e-07	3.1019e-06	-3.03073	Cyanobacteria	Melainabacteria	Gastranaerophilales	Candidatus Melainabacteria bacterium RIFOXYA2_FULL_32_9	Candidatus Melainabacteria bacterium RIFOXYA2_FULL_32_9	B10741_Candidatus Melainabacteria bacterium RIFOXYA2_FULL_32_9	Not_predicted	Fer
fd41dbcac769e7211efbb812dd754a2e	-41.3105	0.10279	-3.70159	0.000214771	0.0010728	-3.87565	Cyanobacteria	Sericytochromatia	uncultured Bacillales bacterium	uncultured Bacillales bacterium	uncultured Bacillales bacterium	B17665_uncultured Bacillales bacterium	Not_predicted	Fer
FJ382618.1.1346	-54.8959	0.13208	-5.2109	1.8962e-07	1.69499e-06	-2.95177	Cyanobacteria	Oxyphotobacteria	Synechococcales	Cyanobiaceae	Cyanobium PCC-6307	B12564_Cyanobium PCC-6307	Not_predicted	Fer
JX223309.1.1384	-32.9305	0.117998	-4.21923	2.4612e-05	0.000149211	-2.86016	Cyanobacteria	Melainabacteria	Gastranaerophilales	Candidatus Melainabacteria bacterium GWA2_34_9	Candidatus Melainabacteria bacterium GWA2_34_9	B15948_Candidatus Melainabacteria bacterium GWA2_34_9	Not_predicted	Fer
KT315915.1.1380	-53.666	0.141318	-2.70304	0.00687613	0.0241039	-4.47251	Cyanobacteria	Oxyphotobacteria	Oxyphotobacteria Incertae Sedis	Unknown Family	Pseudanabaena NgrPSln22	B12999_Pseudanabaena NgrPSln22	Not_predicted	Fer
LN849923.1.1360	-49.7837	0.123873	-4.46082	8.20496e-06	5.44179e-05	-3.52292	Cyanobacteria	Oxyphotobacteria	Phormidesmiales	Nodosilineaceae	Nodosilinea PCC-7104	B9262_Nodosilinea PCC-7104	Not_predicted	Fer
1b447b5e0b0d73d8a5113e5592903df4	-38.62	0.0960953	-3.46051	0.000540173	0.00248752	-3.97393	Dependentiae	Babeliae	Babeliales	#N/A	#N/A	B5499_o_Babeliales	Not_predicted	Fer
31926c4b6c6285fb2f7442174f1ba84b	-26.818	0.0960953	-3.43606	0.00059133	0.00270298	-3.48374	Dependentiae	Babeliae	Babeliales	#N/A	#N/A	B18154_o_Babeliales	Not_predicted	Fer
4f9c006c7455eacf4111d66bca71fcb4	-55.3071	0.137617	-4.95574	7.25894e-07	5.86916e-06	-3.25765	Dependentiae	Babeliae	Babeliales	Vermiphilaceae	#N/A	B11053_f_Vermiphilaceae	Not_predicted	Fer
5903b9866f47e71090cf059d9e0368d9	-38.7055	0.206051	-5.80447	6.54556e-09	7.25331e-08	-0.291103	Dependentiae	Babeliae	Babeliales	UBA12409	uncultured bacterium	B10345_uncultured bacterium	Not_predicted	Fer
90f8fc3360237de35b638ac82191a192	-22.3668	0.12736	-3.9067	9.38448e-05	0.000500983	-2.29076	Dependentiae	Babeliae	Babeliales	#N/A	#N/A	B18594_o_Babeliales	Not_predicted	Fer
AB630783.1.1466	-57.1435	0.207206	-2.80804	0.00498876	0.0180992	-4.46742	Dependentiae	Babeliae	Babeliales	Vermiphilaceae	#N/A	B11278_f_Vermiphilaceae	Not_predicted	Fer
AM936568.1.1361	-52.5041	0.137617	-4.73337	2.22191e-06	1.64901e-05	-3.36713	Dependentiae	Babeliae	Babeliales	Vermiphilaceae	uncultured Candidatus Dependentiae bacterium	B13390_uncultured Candidatus Dependentiae bacterium	Not_predicted	Fer
d0e5c6fe0202c9201ba5f33114dad120	-29.7521	0.0779821	-2.68222	0.00731893	0.0253906	-4.2423	Dependentiae	Babeliae	Babeliales	Vermiphilaceae	uncultured soil bacterium	B17271_uncultured soil bacterium	Not_predicted	Fer
0ddadbe00bdc375fea87962fc51a608e	-35.2055	0.0922758	-3.17386	0.00150633	0.00630511	-4.07665	Elusimicrobia	Lineage IIb	metagenome	metagenome	metagenome	B18429_metagenome	Not_predicted	Fer
100ed5025cbc18c21ab62f82ef5ae349	-43.3185	0.113541	-3.90527	9.43999e-05	0.000501948	-3.77873	Elusimicrobia	Endomicrobia	Endomicrobiales	Endomicrobiaceae	Candidatus Endomicrobium	B11791_Candidatus Endomicrobium	Not_predicted	Fer
572fcf3d2c3f7ae8c19e569c318ac745	-20.9317	0.194444	-3.50933	0.000450128	0.00211153	-2.87057	Elusimicrobia	Elusimicrobia	MVP-88	uncultured bacterium	uncultured bacterium	B10952_uncultured bacterium	Not_predicted	Fer
70588cd4ad624c7672f4d38afcb364d3	-21.763	0.0779821	-2.78839	0.00530164	0.0191232	-3.90304	Elusimicrobia	#N/A	#N/A	#N/A	#N/A	B11711_o_NA	Not_predicted	Fer
76cd9b08651b65cf988d5c1392efe02d	-61.0161	0.241486	-7.67288	1.75142e-14	4.26974e-13	1.2361	Elusimicrobia	Elusimicrobia	MVP-88	uncultured deep-sea bacterium	uncultured deep-sea bacterium	B4615_uncultured deep-sea bacterium	Not_predicted	Fer
7c3669f316345db6652ba731ea854494	-40.468	0.235549	-4.06163	4.89003e-05	0.000278614	-3.52493	Elusimicrobia	Lineage IIa	uncultured actinobacterium	uncultured actinobacterium	uncultured actinobacterium	B6378_uncultured actinobacterium	Not_predicted	Fer
88185e691f78ee8946a11f4fd5aab8e2	-27.3952	0.0718045	-2.46974	0.0135285	0.0424308	-4.30529	Elusimicrobia	Elusimicrobia	Lineage IV	#N/A	#N/A	B11831_o_Lineage IV	Not_predicted	Fer
a4af97bd08203ba8e34f3b339e66dfef	-63.528	0.167288	-3.19977	0.00137733	0.00582273	-4.41533	Elusimicrobia	Lineage IIa	#N/A	#N/A	#N/A	B4525_o_NA	Not_predicted	Fer
a90e6568b963e00878e2240edb5e5174	-66.4411	0.159858	-6.3068	2.90272e-10	3.87913e-09	-2.15655	Elusimicrobia	Lineage IIb	uncultured bacterium	uncultured bacterium	uncultured bacterium	B10636_uncultured bacterium	Not_predicted	Fer
b1324765c30b5d71510aee6c0cff6b8d	-69.8155	0.267885	-7.0002	2.6294e-12	4.79673e-11	-1.27462	Elusimicrobia	Elusimicrobia	MVP-88	uncultured bacterium	uncultured bacterium	B4342_uncultured bacterium	Not_predicted	Fer
b8b17820fe0801ec0b10cde3c61a04f6	-54.8959	0.13208	-5.2109	1.8962e-07	1.69499e-06	-2.95177	Elusimicrobia	Lineage IIc	#N/A	#N/A	#N/A	B14123_o_NA	Not_predicted	Fer
bb043304dfc205d559c2165f7f1c227f	-23.2564	0.0833333	-2.97973	0.00288815	0.0113675	-3.78825	Elusimicrobia	Endomicrobia	Endomicrobiales	Endomicrobiaceae	Candidatus Endomicrobium	B19436_Candidatus Endomicrobium	Not_predicted	Fer
cce9bb61677e630b13651076a5a683de	-37.6597	0.134944	-4.82516	1.40827e-06	1.08624e-05	-2.29015	Elusimicrobia	Lineage IIb	uncultured bacterium	uncultured bacterium	uncultured bacterium	B4177_uncultured bacterium	Not_predicted	Fer
d3e831b41e56082fd652b2c195600551	-59.4123	0.147831	-5.32359	1.02736e-07	9.61062e-07	-3.04242	Elusimicrobia	Endomicrobia	Endomicrobiales	Endomicrobiaceae	Candidatus Endomicrobium	B12142_Candidatus Endomicrobium	Not_predicted	Fer
dae88c0794688f8186377278cdbf5d13	-54.2673	0.130568	-5.15123	2.61013e-07	2.27749e-06	-2.99072	Elusimicrobia	Elusimicrobia	MVP-88	uncultured bacterium	uncultured bacterium	B12549_uncultured bacterium	Not_predicted	Fer
EF515890.1.1410	-33.929	0.496597	-6.31094	2.82637e-10	3.80237e-09	2.2803	Elusimicrobia	Elusimicrobia	MVP-88	uncultured bacterium	uncultured bacterium	B2845_uncultured bacterium	Not_predicted	Fer
GU598741.1.1509	-50.928	0.170258	-3.11589	0.00183625	0.00752939	-4.34989	Elusimicrobia	Lineage IIa	#N/A	#N/A	#N/A	B2138_o_NA	Not_predicted	Fer
HQ190399.1.1525	-40.9608	0.309075	-8.54909	1.32022e-17	4.6584e-16	10.1495	Elusimicrobia	Lineage IIb	uncultured bacterium	uncultured bacterium	uncultured bacterium	B2857_uncultured bacterium	Not_predicted	Fer
JQ625028.1.1358	-30.2086	0.262534	-4.41383	1.0204e-05	6.65247e-05	-2.26191	Elusimicrobia	Endomicrobia	Endomicrobiales	Endomicrobiaceae	Candidatus Endomicrobium	B7227_Candidatus Endomicrobium	Not_predicted	Fer
KJ191880.1.1479	-58.1324	0.329818	-8.1085	5.38997e-16	1.60601e-14	3.07337	Elusimicrobia	Lineage IIa	#N/A	#N/A	#N/A	B5109_o_NA	Not_predicted	Fer
LN555033.1.1358	-35.5432	0.12736	-4.55399	5.29207e-06	3.64197e-05	-2.55469	Elusimicrobia	Elusimicrobia	MVP-88	uncultured delta proteobacterium	uncultured delta proteobacterium	B14785_uncultured delta proteobacterium	Not_predicted	Fer
c9ded6cadbedf9622f88f6dc138eb531	-18.0683	0.279313	-3.26841	0.0010832	0.00467007	-2.97019	FCPU426	uncultured bacterium	uncultured bacterium	uncultured bacterium	uncultured bacterium	B4993_uncultured bacterium	Not_predicted	Fer
e84d9434271686771df3fd72b17c9bc3	-15.9898	0.263663	-2.69208	0.00710606	0.0247911	-3.65145	FCPU426	uncultured bacterium	uncultured bacterium	uncultured bacterium	uncultured bacterium	B8100_uncultured bacterium	Not_predicted	Fer
GQ182301.1.1421	-34.6355	0.0833333	-3.28771	0.00101163	0.00439572	-3.98148	FCPU426	uncultured bacterium	uncultured bacterium	uncultured bacterium	uncultured bacterium	B19569_uncultured bacterium	Not_predicted	Fer
KR095267.1.1511	-41.6971	0.175609	-2.77398	0.00554213	0.0199224	-4.37489	FCPU426	uncultured microorganism	uncultured microorganism	uncultured microorganism	uncultured microorganism	B9826_uncultured microorganism	Not_predicted	Fer
2768595fd6691fabf7d1e9e9fb5e8800	-16.6502	0.213901	-2.70724	0.00678975	0.0238612	-3.68218	Fibrobacteres	Fibrobacteria	Fibrobacterales	#N/A	#N/A	B15257_o_Fibrobacterales	Not_predicted	Fer
4be91febbeba00c6db8d5b9e34929d83	-47.782	0.632756	-11.9075	1.36288e-32	1.92357e-30	30.3937	Fibrobacteres	Fibrobacteria	Fibrobacterales	possible family 01	metagenome	B3710_metagenome	Not_predicted	Fer
4ed1102b4740c35a67930558f7317e7d	-83.1041	0.28915	-4.95068	7.45003e-07	5.98159e-06	-3.96429	Fibrobacteres	Chitinivibrionia	uncultured	uncultured bacterium	uncultured bacterium	B6294_uncultured bacterium	Not_predicted	Fer
6fea81e5286fec9533ec87fc5af1a695	-29.0026	0.166667	-2.81052	0.00495045	0.0180619	-4.1492	Fibrobacteres	Fibrobacteria	Fibrobacterales	Candidatus Raymondbacteria	uncultured bacterium	B15306_uncultured bacterium	Not_predicted	Fer
980c831f813afbc45339b7c559ab42d2	-38.7606	0.138889	-4.96622	6.87811e-07	5.59498e-06	-2.1465	Fibrobacteres	Fibrobacteria	Fibrobacterales	Fibrobacteraceae	possible genus 04	B8891_possible genus 04	Not_predicted	Fer
a20c288e568ed925faa6e3e89aa08209	-43.836	0.187636	-2.46642	0.0136548	0.0427775	-4.47319	Fibrobacteres	Fibrobacteria	Fibrobacterales	#N/A	#N/A	B8731_o_Fibrobacterales	Not_predicted	Fer
AB240303.1.1470	-31.1295	0.262762	-3.74398	0.000181592	0.000920548	-3.38198	Fibrobacteres	Chitinivibrionia	uncultured	uncultured bacterium	uncultured bacterium	B5097_uncultured bacterium	Not_predicted	Fer
ac3b472cdaa8b1be7e79a42d3e401b9e	-27.2319	0.329732	-4.48543	7.31333e-06	4.90707e-05	-1.73045	Fibrobacteres	Fibrobacteria	Fibrobacterales	B122	uncultured bacterium	B6716_uncultured bacterium	Not_predicted	Fer
b846981655084f6185bc5dd0b73f990e	-56.8818	0.149787	-2.86501	0.00417387	0.0156399	-4.45492	Fibrobacteres	Fibrobacteria	Fibrobacterales	B122	uncultured bacterium	B7555_uncultured bacterium	Not_predicted	Fer
d43c6a8afc5eeb578955d6f09e8174d3	-43.6048	0.145776	-2.66784	0.00763955	0.0263551	-4.42311	Fibrobacteres	Chitinivibrionia	uncultured	uncultured bacterium	uncultured bacterium	B2878_uncultured bacterium	Not_predicted	Fer
f9ac0dce63bd7b3ad396d44cbb90c323	-66.7467	0.160593	-6.33582	2.4066e-10	3.27046e-09	-2.13344	Fibrobacteres	Chitinivibrionia	uncultured	uncultured bacterium	uncultured bacterium	B6092_uncultured bacterium	Not_predicted	Fer
JN387453.1.1218	-54.7126	0.29321	-4.98232	6.33034e-07	5.21265e-06	-3.20352	Fibrobacteres	Fibrobacteria	Fibrobacterales	possible family 01	uncultured microorganism	B5383_uncultured microorganism	Not_predicted	Fer
KC432198.1.1342	-61.9633	0.229892	-3.33907	0.000841997	0.00373628	-4.37031	Fibrobacteres	Fibrobacteria	Fibrobacterales	Fibrobacteraceae	possible genus 04	B10844_possible genus 04	Not_predicted	Fer
0f7c6ddb7567ab33195d99eb44c53098	-41.5448	0.138889	-2.54181	0.0110349	0.0358111	-4.44166	Firmicutes	Clostridia	Clostridiales	Clostridiaceae 1	Clostridium sensu stricto 12	B13165_Clostridium sensu stricto 12	Not_predicted	Fer
28242387be3de6e02500682f926f7149	-37.9931	0.0995823	-3.42517	0.000615535	0.00280089	-3.98123	Firmicutes	Clostridia	DTU014	uncultured Bacilli bacterium	uncultured Bacilli bacterium	B12604_uncultured Bacilli bacterium	Not_predicted	Fer
2a4759634297e7acdaa51a69dc551164	-72.5668	0.166667	-2.71879	0.00655728	0.0231172	-4.52504	Firmicutes	Bacilli	Bacillales	Paenibacillaceae	Paenibacillus	B9760_Paenibacillus	Not_predicted	Fer
4fe6a26bd5a2025b2880b6a40d3adbe1	-27.8729	0.210693	-5.28734	1.2529e-07	1.15857e-06	0.284782	Firmicutes	Clostridia	Clostridiales	Heliobacteriaceae	Hydrogenispora	B10344_Hydrogenispora	Not_predicted	Fer
5b87eab3bec2117316b41e9de49a1224	-39.7629	0.14248	-5.09463	3.52308e-07	3.02812e-06	-2.01213	Firmicutes	Clostridia	Clostridiales	#N/A	#N/A	B7955_o_Clostridiales	Not_predicted	Fer
7b8439a6e8d45df18fb1edda46cbdd1b	-43.2953	0.155138	-5.54723	2.93566e-08	2.99713e-07	-1.51116	Firmicutes	Clostridia	Clostridiales	Lachnospiraceae	#N/A	B11156_f_Lachnospiraceae	Not_predicted	Fer
AB240338.1.1481	-76.4209	0.190153	-6.84763	7.70622e-12	1.30519e-10	-1.98661	Firmicutes	Clostridia	Clostridiales	Ruminococcaceae	Acetivibrio	B4765_Acetivibrio	Not_predicted	Fer
AB447733.1.1427	-72.827	0.18121	-6.5256	6.92044e-11	1.01597e-09	-2.23173	Firmicutes	Clostridia	Clostridiales	Clostridiaceae 1	Clostridium sensu stricto 9	B6443_Clostridium sensu stricto 9	Not_predicted	Fer
AB486631.1.1349	-35.4361	0.223151	-2.75708	0.00583679	0.0208605	-4.30572	Firmicutes	Clostridia	Clostridiales	Clostridiaceae 1	Clostridium sensu stricto 12	B2135_Clostridium sensu stricto 12	Not_predicted	Fer
AB487053.1.1357	-37.6597	0.134944	-4.82516	1.40827e-06	1.08624e-05	-2.29015	Firmicutes	Clostridia	Clostridiales	Clostridiaceae 1	Fonticella	B13753_Fonticella	Not_predicted	Fer
AB487128.1.1350	-65.6333	0.39226	-12.7329	5.24346e-37	1.31824e-34	25.6368	Firmicutes	Clostridia	Clostridiales	Ruminococcaceae	Anaerobacterium	B2214_Anaerobacterium	Not_predicted	Fer
AB487631.1.1313	-52.7434	0.138889	-2.65657	0.00789972	0.0270527	-4.47737	Firmicutes	Clostridia	Clostridiales	Clostridiaceae 1	Fonticella	B5341_Fonticella	Not_predicted	Fer
AB488282.1.1368	-48.9709	0.493827	-8.02191	1.09272e-15	3.08455e-14	4.89102	Firmicutes	Clostridia	Clostridiales	Heliobacteriaceae	Hydrogenispora	B1504_Hydrogenispora	Not_predicted	Fer
AB594690.1.1434	-69.3974	0.393378	-9.25874	2.2525e-20	1.05357e-18	4.78073	Firmicutes	Clostridia	Clostridiales	Clostridiaceae 1	Clostridium sensu stricto 5	B1084_Clostridium sensu stricto 5	Not_predicted	Fer
AB630539.1.1437	-82.8932	0.199442	-7.86849	3.75404e-15	1.00336e-13	-0.76188	Firmicutes	Clostridia	Clostridiales	Ruminococcaceae	Ruminiclostridium 1	B5369_Ruminiclostridium 1	Not_predicted	Fer
AB637161.1.1508	-69.5533	0.333226	-4.95254	7.37937e-07	5.93671e-06	-3.7139	Firmicutes	Bacilli	Bacillales	Bacillaceae	Bacillus	B4183_Bacillus	Not_predicted	Fer
AB696034.1.1469	-48.2486	0.120054	-4.32328	1.54404e-05	9.75788e-05	-3.59169	Firmicutes	Bacilli	Bacillales	Alicyclobacillaceae	Tumebacillus	B9289_Tumebacillus	Not_predicted	Fer
AB754148.1.1436	-21.0667	1.72779	-8.45175	3.04538e-17	1.03376e-15	20.4941	Firmicutes	Clostridia	Clostridiales	Ruminococcaceae	#N/A	B1045_f_Ruminococcaceae	Not_predicted	Fer
ad014e3cfff870e3d52b943ae73b838b	-36.7302	0.20855	-4.4526	8.52529e-06	5.64958e-05	-2.81364	Firmicutes	#N/A	#N/A	#N/A	#N/A	B4132_o_NA	Not_predicted	Fer
AJ229190.1.1420	-24.6242	0.158346	-3.7193	0.000200274	0.00100763	-2.90113	Firmicutes	Clostridia	Clostridiales	Christensenellaceae	Christensenellaceae R-7 group	B14901_Christensenellaceae R-7 group	Not_predicted	Fer
AJ229204.1.1369	-53.614	0.128996	-5.08922	3.62495e-07	3.1019e-06	-3.03073	Firmicutes	Bacilli	Bacillales	Paenibacillaceae	Paenibacillus	B9347_Paenibacillus	Not_predicted	Fer
AM900793.1.1533	-42.8194	0.153432	-5.48625	4.15088e-08	4.1483e-07	-1.58115	Firmicutes	Bacilli	Bacillales	Paenibacillaceae	Paenibacillus	B5677_Paenibacillus	Not_predicted	Fer
AM930313.1.1492	-52.5169	0.432746	-8.71065	3.2304e-18	1.23755e-16	6.81776	Firmicutes	Clostridia	Clostridiales	Caldicoprobacteraceae	Caldicoprobacter	B7301_Caldicoprobacter	Not_predicted	Fer
AM930318.1.1511	-24.7767	0.800887	-6.54099	6.24553e-11	9.23626e-10	6.30859	Firmicutes	Bacilli	Bacillales	Bacillaceae	#N/A	B4957_f_Bacillaceae	Not_predicted	Fer
ba34b949d738232fa0704e39b3cabff1	-42.8194	0.153432	-5.48625	4.15088e-08	4.1483e-07	-1.58115	Firmicutes	Clostridia	Clostridiales	Heliobacteriaceae	Hydrogenispora	B11411_Hydrogenispora	Not_predicted	Fer
bdcbd01e5968be8039ada3e8116d7c5b	-24.5737	0.0880535	-3.14851	0.00164325	0.00680037	-3.68067	Firmicutes	Clostridia	Clostridiales	Ruminococcaceae	#N/A	B19057_f_Ruminococcaceae	Not_predicted	Fer
d004a14e76093c411668d638f659a171	-38.5981	0.199991	-6.85202	7.47335e-12	1.26842e-10	3.06977	Firmicutes	Clostridia	Clostridiales	Ruminococcaceae	uncultured	B4994_uncultured	Not_predicted	Fer
d9486c519ac80f442baae341baeb7c34	-43.6048	0.145776	-2.66784	0.00763955	0.0263551	-4.42311	Firmicutes	Clostridia	Clostridiales	Peptococcaceae	Desulfosporosinus	B12404_Desulfosporosinus	Not_predicted	Fer
DQ129318.1.1393	-20.039	0.0718045	-2.5675	0.0102501	0.0336952	-4.02609	Firmicutes	Clostridia	Clostridiales	Peptococcaceae	Desulfotomaculum	B20472_Desulfotomaculum	Not_predicted	Fer
DQ346495.1.1523	-71.7408	0.178507	-6.42827	1.3171e-10	1.84923e-09	-2.30349	Firmicutes	Bacilli	Bacillales	Bacillaceae	Bacillus	B8394_Bacillus	Not_predicted	Fer
DQ816480.1.1440	-30.0558	0.705711	-5.5595	2.73683e-08	2.80124e-07	0.653755	Firmicutes	Clostridia	Clostridiales	Clostridiaceae 1	Clostridium sensu stricto 3	B2676_Clostridium sensu stricto 3	Not_predicted	Fer
EU467849.1.1270	-27.257	0.229633	-3.92843	8.57647e-05	0.000461523	-2.81378	Firmicutes	Clostridia	Clostridiales	Peptostreptococcaceae	Romboutsia	B12827_Romboutsia	Not_predicted	Fer
EU542497.1.1449	-49.8079	0.389664	-7.83566	4.87409e-15	1.27312e-13	3.94605	Firmicutes	Clostridia	Clostridiales	Ruminococcaceae	uncultured	B7611_uncultured	Not_predicted	Fer
EU570250.1.1417	-64.5413	0.160593	-5.78316	7.43005e-09	8.16595e-08	-2.75189	Firmicutes	Bacilli	Bacillales	Paenibacillaceae	Paenibacillus	B10573_Paenibacillus	Not_predicted	Fer
EU589286.1.1308	-67.2965	0.411583	-5.22492	1.75818e-07	1.58928e-06	-3.44046	Firmicutes	Bacilli	Bacillales	#N/A	#N/A	B2440_o_Bacillales	Not_predicted	Fer
EU864448.1.1490	-14.6911	0.253591	-2.48834	0.0128414	0.040593	-3.81	Firmicutes	Clostridia	Clostridiales	Ruminococcaceae	uncultured	B14353_uncultured	Not_predicted	Fer
f55f3223cb13ba8f5ac8a00a79619752	-22.9651	0.195678	-3.26766	0.00108605	0.00467983	-3.42914	Firmicutes	Clostridia	Clostridiales	Ruminococcaceae	Sporobacter	B11004_Sporobacter	Not_predicted	Fer
fbebb4d676ab88b73948abfdd4db1135	-30.9672	0.375272	-6.80476	1.03815e-11	1.72561e-10	5.20962	Firmicutes	Bacilli	#N/A	#N/A	#N/A	B3902_o_NA	Not_predicted	Fer
ff5f35a9cd5aee5afbfd114127f62f5e	-49.2151	0.128996	-4.43687	9.17206e-06	6.01379e-05	-3.52357	Firmicutes	Clostridia	Clostridiales	Ruminococcaceae	uncultured	B9109_uncultured	Not_predicted	Fer
FJ802304.1.1203	-37.6597	0.134944	-4.82516	1.40827e-06	1.08624e-05	-2.29015	Firmicutes	Clostridia	Clostridiales	Gracilibacteraceae	#N/A	B13813_f_Gracilibacteraceae	Not_predicted	Fer
FN667351.1.1498	-47.3541	0.169681	-6.06726	1.32239e-09	1.6022e-08	-0.88296	Firmicutes	Bacilli	Bacillales	Bacillaceae	Bacillus	B9431_Bacillus	Not_predicted	Fer
FPLM01007506.9.1513	-43.1878	0.312754	-7.45583	9.2604e-14	2.01897e-12	4.18446	Firmicutes	Clostridia	Clostridiales	Ruminococcaceae	Ruminococcaceae UCG-012	B3824_Ruminococcaceae UCG-012	Not_predicted	Fer
FR687470.1.1470	-60.8059	0.329732	-7.95368	1.89722e-15	5.20278e-14	2.08195	Firmicutes	Clostridia	Clostridiales	Clostridiaceae 1	Clostridium sensu stricto 12	B705_Clostridium sensu stricto 12	Not_predicted	Fer
GQ134701.1.1328	-17.6484	0.13208	-3.93816	8.23608e-05	0.000446024	-1.44953	Firmicutes	Bacilli	Lactobacillales	Carnobacteriaceae	Atopostipes	B18382_Atopostipes	Not_predicted	Fer
GQ136748.1.1313	-38.62	0.0960953	-3.46051	0.000540173	0.00248752	-3.97393	Firmicutes	Clostridia	Clostridiales	Caldicoprobacteraceae	Caldicoprobacter	B18383_Caldicoprobacter	Not_predicted	Fer
GQ203634.1.1371	-37.1313	0.631379	-9.1325	7.25608e-20	3.22515e-18	15.5766	Firmicutes	Clostridia	Clostridiales	Syntrophomonadaceae	Syntrophomonas	B6279_Syntrophomonas	Not_predicted	Fer
GQ461659.1.1300	-13.057	0.710223	-3.61038	0.000306431	0.00148329	-1.4086	Firmicutes	Clostridia	Clostridiales	Peptococcaceae	Cryptanaerobacter	B2626_Cryptanaerobacter	Not_predicted	Fer
HE589839.1.1436	-80.4509	0.451741	-9.2181	3.28815e-20	1.51044e-18	2.68497	Firmicutes	Clostridia	Clostridiales	Christensenellaceae	uncultured	B6333_uncultured	Not_predicted	Fer
HE804603.1.1437	-43.3185	0.113541	-3.90527	9.43999e-05	0.000501948	-3.77873	Firmicutes	Clostridia	Clostridiales	Christensenellaceae	#N/A	B12432_f_Christensenellaceae	Not_predicted	Fer
HM036046.1.1559	-35.388	0.0880535	-3.17091	0.00152168	0.00635615	-4.08324	Firmicutes	Bacilli	Bacillales	Paenibacillaceae	#N/A	B19154_f_Paenibacillaceae	Not_predicted	Fer
HM315622.1.1373	-80.9136	0.201331	-7.25019	4.29942e-13	8.66888e-12	-1.66358	Firmicutes	Bacilli	Bacillales	Planococcaceae	Lysinibacillus	B6066_Lysinibacillus	Not_predicted	Fer
HM481399.1.1474	-38.0061	0.203885	-5.61482	1.99139e-08	2.07523e-07	-0.664998	Firmicutes	Clostridia	Clostridiales	Syntrophomonadaceae	Syntrophomonas	B12057_Syntrophomonas	Not_predicted	Fer
HQ534365.1.1517	-31.6865	0.113541	-4.05985	4.92743e-05	0.000279754	-2.9974	Firmicutes	Clostridia	Clostridiales	Family XI	Anaerosalibacter	B16436_Anaerosalibacter	Not_predicted	Fer
HQ661225.1.1426	-15.1411	0.537208	-5.45553	4.93518e-08	4.8716e-07	4.88828	Firmicutes	Clostridia	Clostridiales	Peptostreptococcaceae	#N/A	B5957_f_Peptostreptococcaceae	Not_predicted	Fer
HQ697815.1.1476	-24.2112	0.202372	-2.98966	0.00279598	0.0110643	-3.8278	Firmicutes	Clostridia	Clostridiales	Ruminococcaceae	Sporobacter	B6175_Sporobacter	Not_predicted	Fer
JF115001.1.1374	-31.0085	0.111111	-3.97298	7.12061e-05	0.000392365	-3.06998	Firmicutes	Bacilli	Bacillales	Thermoactinomycetaceae	Planifilum	B8686_Planifilum	Not_predicted	Fer
JF116562.1.1324	-50.928	0.170258	-3.11589	0.00183625	0.00752939	-4.34989	Firmicutes	Clostridia	Clostridiales	Heliobacteriaceae	Hydrogenispora	B9373_Hydrogenispora	Not_predicted	Fer
JF116728.1.1351	-29.8438	0.0718045	-2.83287	0.00461739	0.0170087	-4.15687	Firmicutes	Limnochordia	Limnochordales	Limnochordaceae	uncultured bacterium	B20562_uncultured bacterium	Not_predicted	Fer
JN038990.1.1504	-40.9522	0.443394	-7.46577	8.58877e-14	1.88274e-12	4.86654	Firmicutes	Negativicutes	Selenomonadales	Veillonellaceae	uncultured	B6146_uncultured	Not_predicted	Fer
JN627902.1.1484	-54.3596	0.14248	-4.90066	9.6196e-07	7.59467e-06	-3.2744	Firmicutes	Clostridia	Clostridiales	Peptococcaceae	Desulfitobacterium	B8255_Desulfitobacterium	Not_predicted	Fer
JN656732.1.1482	-40.5237	0.253591	-5.17181	2.33861e-07	2.06069e-06	-1.94612	Firmicutes	Clostridia	Clostridiales	Ruminococcaceae	Ruminococcaceae UCG-013	B9973_Ruminococcaceae UCG-013	Not_predicted	Fer
JN698109.1.1385	-40.0779	0.143609	-5.135	2.8455e-07	2.47215e-06	-1.96918	Firmicutes	Negativicutes	Selenomonadales	Veillonellaceae	Sporomusa	B4695_Sporomusa	Not_predicted	Fer
JX102510.1.1506	-49.043	0.117998	-4.65532	3.25362e-06	2.34291e-05	-3.2971	Firmicutes	Clostridia	Clostridiales	Syntrophomonadaceae	Syntrophomonas	B15946_Syntrophomonas	Not_predicted	Fer
JX133588.1.1530	-35.2055	0.0922758	-3.17386	0.00150633	0.00630511	-4.07665	Firmicutes	Clostridia	Clostridiales	Peptococcaceae	Desulfotomaculum	B18805_Desulfotomaculum	Not_predicted	Fer
JX221898.1.1449	-105.928	0.397141	-12.7479	4.33237e-37	1.12432e-34	10.5872	Firmicutes	Clostridia	Clostridiales	Ruminococcaceae	#N/A	B3501_f_Ruminococcaceae	Not_predicted	Fer
JX222293.1.1480	-56.7938	0.621965	-12.1308	9.30207e-34	1.4967e-31	26.1768	Firmicutes	Clostridia	Clostridiales	Clostridiaceae 1	Clostridium sensu stricto 1	B772_Clostridium sensu stricto 1	Not_predicted	Fer
JX223609.1.1232	-42.9567	0.143609	-2.62819	0.00858999	0.0289258	-4.42904	Firmicutes	Clostridia	Clostridiales	Christensenellaceae	Christensenellaceae R-7 group	B9059_Christensenellaceae R-7 group	Not_predicted	Fer
KC432464.1.1335	-55.2093	0.144707	-4.97725	6.49797e-07	5.3343e-06	-3.23086	Firmicutes	Clostridia	Clostridiales	Ruminococcaceae	#N/A	B12582_f_Ruminococcaceae	Not_predicted	Fer
KF275156.1.1480	-10.7803	0.549595	-3.76818	0.00016487	0.000841609	-0.439924	Firmicutes	Negativicutes	Selenomonadales	Veillonellaceae	Pelosinus	B5313_Pelosinus	Not_predicted	Fer
KM494505.1.1448	-49.2151	0.128996	-4.43687	9.17206e-06	6.01379e-05	-3.52357	Firmicutes	Clostridia	Clostridiales	Family XI	Sedimentibacter	B14579_Sedimentibacter	Not_predicted	Fer
KR150755.1.1369	-21.6756	1.01865	-6.17989	6.52711e-10	8.36156e-09	5.78356	Firmicutes	Bacilli	Bacillales	Bacillaceae	Bacillus	B886_Bacillus	Not_predicted	Fer
KX236167.1.1418	-59.813	0.156774	-5.39229	7.02803e-08	6.72301e-07	-2.98324	Firmicutes	Bacilli	Bacillales	Paenibacillaceae	Paenibacillus	B7580_Paenibacillus	Not_predicted	Fer
LC020504.1.1503	-25.5653	0.44167	-6.14511	8.12785e-10	1.0217e-08	4.14749	Firmicutes	Clostridia	Clostridiales	Lachnospiraceae	Anaerosporobacter	B6074_Anaerosporobacter	Not_predicted	Fer
LN566407.1.1366	-43.6153	0.108525	-3.90811	9.32994e-05	0.000499065	-3.7862	Firmicutes	Limnochordia	Limnochordales	Limnochordaceae	uncultured bacterium	B13300_uncultured bacterium	Not_predicted	Fer
0d94258e90f2eb5a2f40a61825e76578	-54.2875	0.693379	-10.6761	1.52985e-26	1.21857e-24	16.9484	Gemmatimonadetes	S0134 terrestrial group	uncultured bacterium	uncultured bacterium	uncultured bacterium	B1467_uncultured bacterium	Not_predicted	Fer
3fe9667f06552efbfcca17d22ff123ed	-10.6921	1.26692	-2.62182	0.0087523	0.0293997	-3.24688	Gemmatimonadetes	S0134 terrestrial group	uncultured bacterium	uncultured bacterium	uncultured bacterium	B967_uncultured bacterium	Not_predicted	Fer
51aaab0e01034e0758bf13afbd5ea4a1	-29.0384	0.214285	-5.97261	2.37068e-09	2.7802e-08	2.34594	Gemmatimonadetes	Gemmatimonadetes	Gemmatimonadales	Gemmatimonadaceae	Gemmatimonas	B12092_Gemmatimonas	Not_predicted	Fer
AM157329.1.1204	-15.2584	2.03887	-4.30639	1.66661e-05	0.000104423	0.18971	Gemmatimonadetes	Gemmatimonadetes	Gemmatimonadales	Gemmatimonadaceae	uncultured	B725_uncultured	Not_predicted	Fer
AY922039.1.1379	-54.779	0.136303	-4.90842	9.24688e-07	7.31476e-06	-3.28422	Gemmatimonadetes	Gemmatimonadetes	Gemmatimonadales	Gemmatimonadaceae	uncultured	B13564_uncultured	Not_predicted	Fer
b02122efc7d52ef66530208e03a8cd00	-24.1667	0.193813	-3.0331	0.00242336	0.00972365	-3.78156	Gemmatimonadetes	S0134 terrestrial group	uncultured soil bacterium	uncultured soil bacterium	uncultured soil bacterium	B7596_uncultured soil bacterium	Not_predicted	Fer
FN436138.1.1497	-48.1365	0.172485	-6.1675	7.0585e-10	8.94262e-09	-0.755392	Gemmatimonadetes	Gemmatimonadetes	Gemmatimonadales	Gemmatimonadaceae	#N/A	B9112_f_Gemmatimonadaceae	Not_predicted	Fer
JN609373.1.1487	-17.9833	0.460589	-2.71344	0.00666398	0.0234618	-3.76747	Gemmatimonadetes	Gemmatimonadetes	Gemmatimonadales	Gemmatimonadaceae	uncultured	B4368_uncultured	Not_predicted	Fer
JX133563.1.1453	-26.3281	2.47827	-10.9171	1.12451e-27	1.01648e-25	38.4486	Gemmatimonadetes	Gemmatimonadetes	Gemmatimonadales	Gemmatimonadaceae	uncultured	B291_uncultured	Not_predicted	Fer
KM108646.1.1486	-27.7108	0.268135	-3.96964	7.2209e-05	0.000397075	-2.78953	Gemmatimonadetes	Gemmatimonadetes	Gemmatimonadales	Gemmatimonadaceae	uncultured	B10419_uncultured	Not_predicted	Fer
KM205465.1.1452	-93.5472	0.214853	-3.50484	0.00045779	0.00214497	-4.47131	Gemmatimonadetes	Gemmatimonadetes	Gemmatimonadales	Gemmatimonadaceae	Gemmatimonas	B4937_Gemmatimonas	Not_predicted	Fer
KM205530.1.1438	-13.0623	2.37374	-5.45345	4.99319e-08	4.9168e-07	5.68425	Gemmatimonadetes	Gemmatimonadetes	Gemmatimonadales	Gemmatimonadaceae	uncultured	B343_uncultured	Not_predicted	Fer
KU713301.1.1377	-35.9586	0.16408	-4.68994	2.74924e-06	2.00705e-05	-2.36257	Gemmatimonadetes	Gemmatimonadetes	Gemmatimonadales	Gemmatimonadaceae	Gemmatimonas	B9386_Gemmatimonas	Not_predicted	Fer
EF585981.1.1529	-33.4112	0.167288	-5.43559	5.51969e-08	5.38906e-07	-0.376858	Halanaerobiaeota	Halanaerobiia	Halanaerobiales	Halanaerobiaceae	Halocella	B9875_Halocella	Not_predicted	Fer
7160406d4ec217a42265eec3f3b9041d	-52.9341	0.12736	-5.02468	5.08223e-07	4.23694e-06	-3.07185	Hydrogenedentes	Hydrogenedentia	Hydrogenedentiales	Hydrogenedensaceae	uncultured bacterium	B10349_uncultured bacterium	Not_predicted	Fer
AM490648.1.1538	-45.0191	0.117998	-4.05859	4.95414e-05	0.000280676	-3.70848	Hydrogenedentes	Hydrogenedentia	Hydrogenedentiales	Hydrogenedensaceae	uncultured bacterium	B15849_uncultured bacterium	Not_predicted	Fer
cb91490dc8e4b35f78ab669d2459b9e7	-11.0498	0.296161	-3.87773	0.000105744	0.000558573	-0.152162	Hydrogenedentes	Hydrogenedentia	Hydrogenedentiales	Hydrogenedensaceae	uncultured bacterium SJP-3	B6165_uncultured bacterium SJP-3	Not_predicted	Fer
e53cd5da7a1adf50d608dc3084ce3508	-53.8724	0.386552	-7.18936	6.71756e-13	1.31812e-11	1.01054	Hydrogenedentes	Hydrogenedentia	Hydrogenedentiales	Hydrogenedensaceae	#N/A	B3194_f_Hydrogenedensaceae	Not_predicted	Fer
275301be130ada87534306abf88172f5	-60.9474	0.151651	-5.46114	4.78217e-08	4.73217e-07	-2.95799	Kiritimatiellaeota	Kiritimatiellae	WCHB1-41	#N/A	#N/A	B9005_o_WCHB1-41	Not_predicted	Fer
55164f1e664d2a8576f7d972d21dcbec	-40.3843	0.144707	-5.17426	2.30824e-07	2.03616e-06	-1.92708	Kiritimatiellaeota	Kiritimatiellae	WCHB1-41	uncultured Verrucomicrobia bacterium	uncultured Verrucomicrobia bacterium	B9146_uncultured Verrucomicrobia bacterium	Not_predicted	Fer
93077899b6a204c492ae91fd6854541c	-30.2393	0.266249	-4.57007	4.90199e-06	3.4006e-05	-1.95597	Kiritimatiellaeota	Kiritimatiellae	WCHB1-41	uncultured Verrucomicrobia bacterium	uncultured Verrucomicrobia bacterium	B5598_uncultured Verrucomicrobia bacterium	Not_predicted	Fer
AM086121.1.1507	-50.2532	0.900618	-12.6075	2.56232e-36	5.57131e-34	34.9337	Kiritimatiellaeota	Kiritimatiellae	WCHB1-41	uncultured soil bacterium PBS-III-20	uncultured soil bacterium PBS-III-20	B2415_uncultured soil bacterium PBS-III-20	Not_predicted	Fer
b15acf01e57322512794da800688d45a	-32.9305	0.117998	-4.21923	2.4612e-05	0.000149211	-2.86016	Kiritimatiellaeota	Kiritimatiellae	WCHB1-41	#N/A	#N/A	B15852_o_WCHB1-41	Not_predicted	Fer
cc9670c93029ee4b83aea4c82b05a5b1	-59.2277	0.155964	-2.98317	0.00285589	0.0112847	-4.44144	Kiritimatiellaeota	Kiritimatiellae	WCHB1-41	uncultured soil bacterium PBS-III-20	uncultured soil bacterium PBS-III-20	B2855_uncultured soil bacterium PBS-III-20	Not_predicted	Fer
DQ404592.1.1547	-39.9441	0.133538	-2.44387	0.0145383	0.045211	-4.45546	Kiritimatiellaeota	Kiritimatiellae	WCHB1-41	Lentisphaerae bacterium RIFOXYC12_FULL_60_16	Lentisphaerae bacterium RIFOXYC12_FULL_60_16	B13970_Lentisphaerae bacterium RIFOXYC12_FULL_60_16	Not_predicted	Fer
fdfe17a420aa531b87f260912d5add35	-9.86853	0.345981	-2.86916	0.00411959	0.015516	-2.65649	Kiritimatiellaeota	Kiritimatiellae	WCHB1-41	#N/A	#N/A	B3461_o_WCHB1-41	Not_predicted	Fer
LN870938.1.1437	-60.9563	0.325917	-4.24164	2.22799e-05	0.000136306	-3.98561	Kiritimatiellaeota	Kiritimatiellae	WCHB1-41	uncultured soil bacterium PBS-III-20	uncultured soil bacterium PBS-III-20	B2364_uncultured soil bacterium PBS-III-20	Not_predicted	Fer
098395cf7acbeaf69daf6b2a51a75fd9	-51.3366	0.485806	-11.3624	7.79362e-30	8.83093e-28	23.4796	Latescibacteria	uncultured soil bacterium PRR-10	uncultured soil bacterium PRR-10	uncultured soil bacterium PRR-10	uncultured soil bacterium PRR-10	B3143_uncultured soil bacterium PRR-10	Not_predicted	Fer
1d301ac464730d77b5666b08f0e8af44	-52.0027	0.136303	-4.68818	2.77302e-06	2.01891e-05	-3.39163	Latescibacteria	uncultured bacterium	uncultured bacterium	uncultured bacterium	uncultured bacterium	B2382_uncultured bacterium	Not_predicted	Fer
46fb29557689c9641350a8e42cbf263b	-57.9318	0.152551	-2.9179	0.00352756	0.0135204	-4.44896	Latescibacteria	uncultured bacterium mle1-16	uncultured bacterium mle1-16	uncultured bacterium mle1-16	uncultured bacterium mle1-16	B6078_uncultured bacterium mle1-16	Not_predicted	Fer
AJ390441.1.1402	-29.8417	0.284632	-4.22295	2.42091e-05	0.000147435	-2.57038	Latescibacteria	uncultured soil bacterium PBS-II-5	uncultured soil bacterium PBS-II-5	uncultured soil bacterium PBS-II-5	uncultured soil bacterium PBS-II-5	B5132_uncultured soil bacterium PBS-II-5	Not_predicted	Fer
ce49d39b5dc02771c4b22203f4df4612	-30.7752	0.248485	-3.2457	0.00117338	0.00503644	-3.88124	Latescibacteria	Latescibacteria	Latescibacterales	Latescibacteraceae	metagenome	B11510_metagenome	Not_predicted	Fer
d2af91f96dfc4d692ddc46acbe4124b9	-10.5092	1.81093	-2.8883	0.00387713	0.0147617	-2.70879	Latescibacteria	uncultured bacterium mle1-16	uncultured bacterium mle1-16	uncultured bacterium mle1-16	uncultured bacterium mle1-16	B716_uncultured bacterium mle1-16	Not_predicted	Fer
db39cbb2d3aa8ed22f572b2cbf067cdb	-25.4704	0.184149	-4.44896	8.67094e-06	5.73194e-05	-1.5475	Latescibacteria	uncultured Pelobacter sp.	uncultured Pelobacter sp.	uncultured Pelobacter sp.	uncultured Pelobacter sp.	B15885_uncultured Pelobacter sp.	Not_predicted	Fer
dc063b4d6c48bc8dcbe697523913976b	-18.1956	1.64297	-6.87095	6.54773e-12	1.1184e-10	11.2224	Latescibacteria	uncultured proteobacterium	uncultured proteobacterium	uncultured proteobacterium	uncultured proteobacterium	B1557_uncultured proteobacterium	Not_predicted	Fer
e44de76fcaa85a7528c103f627139661	-72.5659	0.174595	-6.8882	5.80264e-12	9.95356e-11	-1.67324	Latescibacteria	#N/A	#N/A	#N/A	#N/A	B8856_o_NA	Not_predicted	Fer
f2212705fc0b3801a93eaabcab28370d	-37.1939	0.309856	-5.25165	1.52139e-07	1.39087e-06	-1.39858	Latescibacteria	#N/A	#N/A	#N/A	#N/A	B1522_o_NA	Not_predicted	Fer
HM243794.1.1512	-60.422	0.159109	-3.04332	0.00234257	0.00943712	-4.43437	Latescibacteria	uncultured Acidobacterium sp.	uncultured Acidobacterium sp.	uncultured Acidobacterium sp.	uncultured Acidobacterium sp.	B4276_uncultured Acidobacterium sp.	Not_predicted	Fer
JN038717.1.1516	-41.5571	0.610558	-10.9331	9.44087e-28	8.63089e-26	26.4383	Latescibacteria	uncultured Latescibacteria bacterium	uncultured Latescibacteria bacterium	uncultured Latescibacteria bacterium	uncultured Latescibacteria bacterium	B1642_uncultured Latescibacteria bacterium	Not_predicted	Fer
KY190424.1.1482	-36.5251	0.396478	-3.9257	8.67405e-05	0.00046615	-3.47787	Latescibacteria	uncultured soil bacterium	uncultured soil bacterium	uncultured soil bacterium	uncultured soil bacterium	B3381_uncultured soil bacterium	Not_predicted	Fer
3ef473a965530fbb878dc04a2bde7177	-55.3467	0.198321	-7.09132	1.3686e-12	2.59068e-11	0.518592	Nitrospinae	P9X2b3D02	#N/A	#N/A	#N/A	B6343_o_NA	Not_predicted	Fer
833fe3f16e5cca6becdb6a62a0d4bdb6	-74.5379	0.19628	-3.75431	0.000174266	0.000887884	-4.34011	Nitrospinae	P9X2b3D02	uncultured prokaryote	uncultured prokaryote	uncultured prokaryote	B3938_uncultured prokaryote	Not_predicted	Fer
a40029b31e40d199e7f1a3a1442e10f6	-7.48661	0.423749	-2.50511	0.0122485	0.0391496	-3.09469	Nitrospinae	P9X2b3D02	uncultured Nitrospina sp.	uncultured Nitrospina sp.	uncultured Nitrospina sp.	B1936_uncultured Nitrospina sp.	Not_predicted	Fer
FN429806.1.1520	-76.5647	0.610676	-6.79396	1.11883e-11	1.84446e-10	-2.07223	Nitrospinae	P9X2b3D02	uncultured prokaryote	uncultured prokaryote	uncultured prokaryote	B711_uncultured prokaryote	Not_predicted	Fer
KX504796.1.1522	-66.3746	0.39747	-4.76753	1.87688e-06	1.41117e-05	-3.76819	Nitrospinae	P9X2b3D02	uncultured prokaryote	uncultured prokaryote	uncultured prokaryote	B1307_uncultured prokaryote	Not_predicted	Fer
40ac11db9f8edeb25da3d1405ff20485	-11.5678	0.568861	-2.87028	0.00410501	0.0154683	-2.89381	Nitrospirae	4-29-1	#N/A	#N/A	#N/A	B1876_o_NA	Not_predicted	Fer
5361cedea8ee9dfaa563e550cf8652b5	-54.423	0.52339	-11.2929	1.71495e-29	1.83957e-27	21.1528	Nitrospirae	Thermodesulfovibrionia	uncultured	uncultured bacterium	uncultured bacterium	B2991_uncultured bacterium	Not_predicted	Fer
55972a545890196137f200691de711b5	-64.7967	0.148821	-2.42767	0.0152039	0.0469541	-4.5415	Nitrospirae	Thermodesulfovibrionia	uncultured	uncultured bacterium	uncultured bacterium	B2723_uncultured bacterium	Not_predicted	Fer
5cd324a885152a15dd47ec844e7e1411	-22.4757	0.645549	-7.75024	9.5673e-15	2.42041e-13	14.5579	Nitrospirae	4-29-1	uncultured proteobacterium	uncultured proteobacterium	uncultured proteobacterium	B1112_uncultured proteobacterium	Not_predicted	Fer
AB924399.1.1500	-33.3853	1.1242	-6.17754	6.62478e-10	8.47319e-09	1.93983	Nitrospirae	Thermodesulfovibrionia	uncultured	uncultured Sphingobacteriales bacterium	uncultured Sphingobacteriales bacterium	B790_uncultured Sphingobacteriales bacterium	Not_predicted	Fer
DQ138962.1.1480	-63.5874	0.166667	-5.73256	1.00218e-08	1.08513e-07	-2.76543	Nitrospirae	Thermodesulfovibrionia	uncultured	uncultured bacterium	uncultured bacterium	B5691_uncultured bacterium	Not_predicted	Fer
EU662546.1.1491	-43.645	0.493837	-9.47668	2.88186e-21	1.42236e-19	14.4317	Nitrospirae	Thermodesulfovibrionia	uncultured	uncultured bacterium	uncultured bacterium	B2924_uncultured bacterium	Not_predicted	Fer
FJ800547.1.1496	-52.2269	0.397678	-5.40698	6.47623e-08	6.23967e-07	-2.53441	Nitrospirae	Nitrospira	Nitrospirales	Nitrospiraceae	Nitrospira	B2467_Nitrospira	Not_predicted	Fer
GU127821.1.1448	-58.2367	0.577338	-9.09314	1.04164e-19	4.57921e-18	6.84164	Nitrospirae	Thermodesulfovibrionia	uncultured	uncultured bacterium	uncultured bacterium	B387_uncultured bacterium	Not_predicted	Fer
JN698926.1.1363	-48.6204	0.381996	-6.43483	1.26157e-10	1.77436e-09	-0.186505	Nitrospirae	Nitrospira	Nitrospirales	Nitrospiraceae	Nitrospira	B4053_Nitrospira	Not_predicted	Fer
2db974c23687622a4e1d2e3aca9d93d4	-33.5946	0.0880535	-3.02863	0.00245948	0.00984404	-4.12848	Omnitrophicaeota	uncultured bacterium	uncultured bacterium	uncultured bacterium	uncultured bacterium	B18886_uncultured bacterium	Not_predicted	Fer
361a5eb6d008699f9c46aa856b4e6517	-33.9962	0.201331	-5.11508	3.16233e-07	2.73265e-06	-1.27115	Omnitrophicaeota	Omnitrophia	Omnitrophales	Omnitrophaceae	Candidatus Omnitrophus	B14235_Candidatus Omnitrophus	Not_predicted	Fer
3f19d8ff0417bd424d228fa876486303	-22.8519	0.115831	-3.95063	7.81876e-05	0.000426454	-2.26601	Omnitrophicaeota	uncultured bacterium	uncultured bacterium	uncultured bacterium	uncultured bacterium	B14625_uncultured bacterium	Not_predicted	Fer
7b46917d8adcf94dd20e084575a22ff9	-54.2673	0.130568	-5.15123	2.61013e-07	2.27749e-06	-2.99072	Omnitrophicaeota	uncultured bacterium	uncultured bacterium	uncultured bacterium	uncultured bacterium	B7459_uncultured bacterium	Not_predicted	Fer
801be5fd83de61a0ecf763ac7f139ae3	-38.3522	0.0922758	-3.64051	0.000272717	0.00133456	-3.82749	Omnitrophicaeota	uncultured bacterium	uncultured bacterium	uncultured bacterium	uncultured bacterium	B12641_uncultured bacterium	Not_predicted	Fer
82f54e09818af027a28b49a154447b4a	-14.3077	1.01009	-5.45619	4.91689e-08	4.85951e-07	5.21465	Omnitrophicaeota	uncultured bacterium	uncultured bacterium	uncultured bacterium	uncultured bacterium	B4002_uncultured bacterium	Not_predicted	Fer
a0c715692babe4d90c694d264c5cb84d	-13.5266	0.431156	-2.70773	0.00677978	0.0238389	-3.41067	Omnitrophicaeota	#N/A	#N/A	#N/A	#N/A	B8285_o_NA	Not_predicted	Fer
c49a780fc82578d998178f827869c144	-29.8438	0.0718045	-2.83287	0.00461739	0.0170087	-4.15687	Omnitrophicaeota	Omnitrophia	Omnitrophales	Omnitrophaceae	Candidatus Omnitrophus	B20422_Candidatus Omnitrophus	Not_predicted	Fer
e8358596ed8264b98ac7e2fb8a2e6ad9	-22.4627	0.313867	-4.15675	3.24025e-05	0.000190833	-1.75557	Omnitrophicaeota	Omnitrophia	Omnitrophales	Omnitrophaceae	Candidatus Omnitrophus	B3724_Candidatus Omnitrophus	Not_predicted	Fer
0a2da4d1572c32555d01c55a5d21fe8a	-39.9389	0.16408	-4.86415	1.15745e-06	9.06686e-06	-2.43256	Patescibacteria	Gracilibacteria	uncultured marine bacterium	uncultured marine bacterium	uncultured marine bacterium	B16776_uncultured marine bacterium	Not_predicted	Fer
227a06f285e7bcf04057a69de8a2e4b6	-8.28769	0.312852	-3.12927	0.00175471	0.00722077	-1.78529	Patescibacteria	Microgenomatia	Candidatus Woesebacteria	uncultured eubacterium WCHB1-56	uncultured eubacterium WCHB1-56	B8708_uncultured eubacterium WCHB1-56	Not_predicted	Fer
243334155adf1abb65aa4a7d4b6626aa	-29.8438	0.0718045	-2.83287	0.00461739	0.0170087	-4.15687	Patescibacteria	Parcubacteria	Candidatus Nomurabacteria	#N/A	#N/A	B20145_o_Candidatus Nomurabacteria	Not_predicted	Fer
2fd021b4e6f50ce77e258d35abfaf1df	-46.1806	0.111111	-4.38362	1.17266e-05	7.55932e-05	-3.45183	Patescibacteria	Microgenomatia	Candidatus Woesebacteria	#N/A	#N/A	B8418_o_Candidatus Woesebacteria	Not_predicted	Fer
3068d982a4dc4306b5eafc92170d2586	-20.039	0.0718045	-2.5675	0.0102501	0.0336952	-4.02609	Patescibacteria	Parcubacteria	Candidatus Campbellbacteria	uncultured soil bacterium	uncultured soil bacterium	B18890_uncultured soil bacterium	Not_predicted	Fer
4414a0aa9d1bf3efbf5e8f4a9713e343	-45.1057	0.108525	-4.28158	1.86358e-05	0.000115505	-3.50753	Patescibacteria	ABY1	Candidatus Magasanikbacteria	#N/A	#N/A	B8829_o_Candidatus Magasanikbacteria	Not_predicted	Fer
5880441410ceff5704643588726b125f	-35.388	0.0880535	-3.17091	0.00152168	0.00635615	-4.08324	Patescibacteria	Microgenomatia	Candidatus Amesbacteria	#N/A	#N/A	B18191_o_Candidatus Amesbacteria	Not_predicted	Fer
5e559eaf4beaf920b13e5a8906c76a76	-38.4056	0.137617	-4.92073	8.68462e-07	6.89031e-06	-2.19328	Patescibacteria	Microgenomatia	Candidatus Woesebacteria	Candidatus Woesebacteria bacterium GW2011_GWA2_40_7b	Candidatus Woesebacteria bacterium GW2011_GWA2_40_7b	B13349_Candidatus Woesebacteria bacterium GW2011_GWA2_40_7b	Not_predicted	Fer
62ee84f98b86393116c4b5fc2f8fba74	-19.6617	0.173023	-3.61637	0.000299425	0.00145113	-2.51496	Patescibacteria	ABY1	Candidatus Magasanikbacteria	Candidatus Magasanikbacteria bacterium RIFOXYD1_FULL_40_23	Candidatus Magasanikbacteria bacterium RIFOXYD1_FULL_40_23	B11153_Candidatus Magasanikbacteria bacterium RIFOXYD1_FULL_40_23	Not_predicted	Fer
a22e837eaf0a5ad8150e6453d32b6298	-15.3771	0.111111	-2.62093	0.00877505	0.0294638	-3.6961	Patescibacteria	Parcubacteria	Candidatus Yanofskybacteria	Candidatus Yanofskybacteria bacterium GW2011_GWF2_43_596	Candidatus Yanofskybacteria bacterium GW2011_GWF2_43_596	B11496_Candidatus Yanofskybacteria bacterium GW2011_GWF2_43_596	Not_predicted	Fer
a725aecb5e35271b6ac129d52e9624a3	-19.3813	0.191858	-3.07782	0.00208779	0.00851737	-3.40289	Patescibacteria	Saccharimonadia	Saccharimonadales	wastewater metagenome	wastewater metagenome	B7683_wastewater metagenome	Not_predicted	Fer
aa920e60e4416f9febe7d76acc1f507d	-32.4114	0.0779821	-3.07659	0.00209639	0.00853946	-4.06613	Patescibacteria	Parcubacteria	Candidatus Colwellbacteria	#N/A	#N/A	B19876_o_Candidatus Colwellbacteria	Not_predicted	Fer
AB179669.1.1356	-18.7584	0.194444	-3.27002	0.00107707	0.00464734	-3.04413	Patescibacteria	Microgenomatia	Candidatus Woesebacteria	uncultured Microgenomates group bacterium	uncultured Microgenomates group bacterium	B12371_uncultured Microgenomates group bacterium	Not_predicted	Fer
cf4bbb88566643b3c9ef7bfc9035c82e	-53.6678	0.133538	-4.80885	1.528e-06	1.16963e-05	-3.33929	Patescibacteria	Microgenomatia	Candidatus Woesebacteria	uncultured eubacterium WCHB1-56	uncultured eubacterium WCHB1-56	B13958_uncultured eubacterium WCHB1-56	Not_predicted	Fer
dfa837dd781f88339b8cbd1ab6ddb791	-27.3952	0.0718045	-2.46974	0.0135285	0.0424308	-4.30529	Patescibacteria	Microgenomatia	Candidatus Woesebacteria	uncultured bacterium	uncultured bacterium	B20470_uncultured bacterium	Not_predicted	Fer
DQ676471.1.1347	-18.8422	0.199165	-3.20686	0.00134382	0.00571378	-3.15711	Patescibacteria	ABY1	Candidatus Magasanikbacteria	uncultured Parcubacteria group bacterium	uncultured Parcubacteria group bacterium	B3884_uncultured Parcubacteria group bacterium	Not_predicted	Fer
HE647661.1.1352	-42.5041	0.10576	-3.80854	0.000140167	0.000725642	-3.82993	Patescibacteria	Saccharimonadia	Saccharimonadales	wastewater metagenome	wastewater metagenome	B15198_wastewater metagenome	Not_predicted	Fer
JN387371.1.1261	-31.3404	0.0779821	-2.80823	0.00498583	0.0180992	-4.20667	Patescibacteria	CPR2	uncultured microorganism	uncultured microorganism	uncultured microorganism	B20048_uncultured microorganism	Not_predicted	Fer
HQ003612.1.1519	-13.7047	0.220462	-4.54781	5.4497e-06	3.73767e-05	1.49394	PAUC34f	#N/A	#N/A	#N/A	#N/A	B12437_o_NA	Not_predicted	Fer
05ad30cf9613e1f2815b696bcc680dda	-39.9397	0.0960953	-3.79121	0.000150318	0.000772721	-3.75693	Planctomycetes	Phycisphaerae	Phycisphaerales	AKAU3564 sediment group	#N/A	B18104_f_AKAU3564 sediment group	Not_predicted	Fer
072f83e20b734759858cd723542e6406	-54.2258	0.324674	-10.4741	1.30553e-25	9.63575e-24	15.6753	Planctomycetes	Phycisphaerae	Tepidisphaerales	WD2101 soil group	uncultured Planctomycetaceae bacterium	B6023_uncultured Planctomycetaceae bacterium	Not_predicted	Fer
0f54c55ab0179d97dde5a63d478b917b	-45.9533	0.287218	-6.81696	9.53885e-12	1.60544e-10	1.30483	Planctomycetes	Phycisphaerae	MSBL9	GWC2-45-44	uncultured bacterium	B3785_uncultured bacterium	Not_predicted	Fer
13423def29869e3f532194c0889b2348	-55.3071	0.137617	-4.95574	7.25894e-07	5.86916e-06	-3.25765	Planctomycetes	Phycisphaerae	MSBL9	4572-13	uncultured bacterium	B13316_uncultured bacterium	Not_predicted	Fer
15be5b54762fa657c19798ccf7f61e89	-48.7431	0.421699	-5.94278	2.84445e-09	3.31167e-08	-1.30899	Planctomycetes	Phycisphaerae	Tepidisphaerales	WD2101 soil group	#N/A	B2787_f_WD2101 soil group	Not_predicted	Fer
246f9178e969662bcda600ddb7cb86e0	-54.6535	0.314717	-10.4155	2.4139e-25	1.73391e-23	15.1107	Planctomycetes	Planctomycetacia	Gemmatales	Gemmataceae	uncultured	B6204_uncultured	Not_predicted	Fer
2c9ce34a329578d6c15866a2db5248aa	-54.3337	0.273136	-6.89225	5.64016e-12	9.71629e-11	0.153303	Planctomycetes	Planctomycetacia	Gemmatales	Gemmataceae	uncultured	B7088_uncultured	Not_predicted	Fer
2e0241311b183a39446051cf1833a464	-49.8973	0.120054	-4.73642	2.18884e-06	1.63006e-05	-3.24912	Planctomycetes	Pla3 lineage	uncultured soil bacterium PBS-II-37	uncultured soil bacterium PBS-II-37	uncultured soil bacterium PBS-II-37	B15519_uncultured soil bacterium PBS-II-37	Not_predicted	Fer
35ca2ea29da28862900377b1284a0936	-39.7313	0.268678	-4.1756	2.98338e-05	0.000177525	-3.36722	Planctomycetes	Planctomycetacia	Pirellulales	Pirellulaceae	uncultured	B5092_uncultured	Not_predicted	Fer
369729b780bf6420412623dff0cc87e6	-30.5309	0.440098	-5.64131	1.7083e-08	1.78949e-07	0.80842	Planctomycetes	Planctomycetacia	Gemmatales	Gemmataceae	uncultured	B3206_uncultured	Not_predicted	Fer
41fc216c3fd1bdeacd35417b6c50ea20	-48.8085	0.422439	-10.0716	8.30697e-24	5.18059e-22	15.697	Planctomycetes	Phycisphaerae	Pla1 lineage	uncultured bacterium	uncultured bacterium	B2921_uncultured bacterium	Not_predicted	Fer
430ac98fe4b32a9908dfdb91a2f02a96	-46.5494	0.122009	-4.19654	2.72087e-05	0.00016311	-3.64296	Planctomycetes	Phycisphaerae	Tepidisphaerales	WD2101 soil group	#N/A	B12485_f_WD2101 soil group	Not_predicted	Fer
43cdbfe531cd2ec4955707572301aad1	-38.0854	0.289267	-4.21526	2.50484e-05	0.000151173	-3.22868	Planctomycetes	Planctomycetacia	Pirellulales	Pirellulaceae	Pirellula	B7007_Pirellula	Not_predicted	Fer
5d66be2775eb4b77ae4deeae7cd3cb79	-22.1782	0.519627	-7.65347	2.0365e-14	4.94974e-13	14.0789	Planctomycetes	Planctomycetacia	Pirellulales	Pirellulaceae	#N/A	B3106_f_Pirellulaceae	Not_predicted	Fer
63eea02f7f81e8871fcc5f2ba769e20d	-20.8269	0.156774	-4.41941	9.94439e-06	6.49372e-05	-0.777033	Planctomycetes	Pla3 lineage	uncultured bacterium	uncultured bacterium	uncultured bacterium	B17153_uncultured bacterium	Not_predicted	Fer
66530e0f036450f5f76d320db837ede5	-43.9565	0.10576	-4.1725	3.02437e-05	0.000179168	-3.56563	Planctomycetes	Phycisphaerae	#N/A	#N/A	#N/A	B13522_o_NA	Not_predicted	Fer
6d848b1f27019cd1eeab18596d9fe5aa	-42.5735	0.152551	-5.45475	4.95697e-08	4.88711e-07	-1.61699	Planctomycetes	Planctomycetacia	Planctomycetales	uncultured	metagenome	B11488_metagenome	Not_predicted	Fer
6de41ab846effccebc6cb07c4174d41f	-53.4713	0.354326	-4.87873	1.07515e-06	8.43859e-06	-3.25879	Planctomycetes	Phycisphaerae	MSBL9	GWC2-45-44	uncultured bacterium	B3790_uncultured bacterium	Not_predicted	Fer
726652b54bd99fe7b1c55a49440a283a	-35.388	0.0880535	-3.17091	0.00152168	0.00635615	-4.08324	Planctomycetes	Phycisphaerae	Tepidisphaerales	WD2101 soil group	#N/A	B9010_f_WD2101 soil group	Not_predicted	Fer
72a391ab123ae1dc41a86e4231ef38c0	-49.5541	0.177564	-6.34913	2.20761e-10	3.02045e-09	-0.518938	Planctomycetes	Phycisphaerae	Tepidisphaerales	WD2101 soil group	#N/A	B3204_f_WD2101 soil group	Not_predicted	Fer
7500630ac891dda4bc7c99aed24594ba	-49.7837	0.123873	-4.46082	8.20496e-06	5.44179e-05	-3.52292	Planctomycetes	Phycisphaerae	Tepidisphaerales	WD2101 soil group	#N/A	B15078_f_WD2101 soil group	Not_predicted	Fer
7721591b86f292b5a01325a5d17643ee	-27.3952	0.0718045	-2.46974	0.0135285	0.0424308	-4.30529	Planctomycetes	Phycisphaerae	MSBL9	SG8-4	#N/A	B20275_f_SG8-4	Not_predicted	Fer
79f5c064d953f1f3c7c8634918d43f8f	-80.9327	0.555842	-10.6837	1.41015e-26	1.14592e-24	7.72468	Planctomycetes	Planctomycetacia	Pirellulales	Pirellulaceae	uncultured	B2945_uncultured	Not_predicted	Fer
7a1ebe2a5ae4addd5a0f135ee9b26856	-33.5946	0.0880535	-3.02863	0.00245948	0.00984404	-4.12848	Planctomycetes	OM190	#N/A	#N/A	#N/A	B15317_o_NA	Not_predicted	Fer
7acc9bafb3fa61a36998991bae577f00	-39.9397	0.0960953	-3.79121	0.000150318	0.000772721	-3.75693	Planctomycetes	Planctomycetacia	Isosphaerales	Isosphaeraceae	uncultured	B11385_uncultured	Not_predicted	Fer
7b6ff97efc25ed94cb92327d3e58c5b5	-66.8045	0.153432	-2.5029	0.0123252	0.0393011	-4.53742	Planctomycetes	Planctomycetacia	Isosphaerales	Isosphaeraceae	#N/A	B7460_f_Isosphaeraceae	Not_predicted	Fer
7d8e23a82ccb571c3cfe8dba936d950f	-29.5168	0.251005	-4.44094	9.00039e-06	5.93023e-05	-2.12778	Planctomycetes	Planctomycetacia	Gemmatales	Gemmataceae	uncultured	B10454_uncultured	Not_predicted	Fer
7ef6b927bc080149727beb93f52b9cd6	-29.6033	0.621715	-6.48989	8.77279e-11	1.25806e-09	4.27421	Planctomycetes	Phycisphaerae	Tepidisphaerales	WD2101 soil group	#N/A	B4701_f_WD2101 soil group	Not_predicted	Fer
874533b847c0dbbb25cb140194f98458	-26.818	0.0960953	-3.43606	0.00059133	0.00270298	-3.48374	Planctomycetes	OM190	planctomycete A-2	planctomycete A-2	planctomycete A-2	B14462_planctomycete A-2	Not_predicted	Fer
8a3d94a98c24fca42ccda3975af6097c	-50.1578	0.13208	-2.52634	0.0115328	0.0370978	-4.49053	Planctomycetes	Planctomycetacia	Gemmatales	Gemmataceae	uncultured	B14100_uncultured	Not_predicted	Fer
8dc071842cbf40fca5526277afd2218d	-7.41381	0.313899	-2.63063	0.00852852	0.0287848	-2.83455	Planctomycetes	Phycisphaerae	MSBL9	SG8-4	#N/A	B1782_f_SG8-4	Not_predicted	Fer
9262b60d35d6824d8ea0861417727e7b	-61.2599	0.161315	-3.08553	0.00203443	0.00831233	-4.42933	Planctomycetes	Phycisphaerae	Tepidisphaerales	WD2101 soil group	#N/A	B10459_f_WD2101 soil group	Not_predicted	Fer
940f54d99eae496cd57e523344af9c01	-31.3404	0.0779821	-2.80823	0.00498583	0.0180992	-4.20667	Planctomycetes	#N/A	#N/A	#N/A	#N/A	B19846_o_NA	Not_predicted	Fer
998b60e1f4b1167bf2586524115bd7a5	-41.1642	0.137617	-2.51852	0.0117919	0.037795	-4.44499	Planctomycetes	Phycisphaerae	MSBL9	SG8-4	#N/A	B13373_f_SG8-4	Not_predicted	Fer
a2b6325abc797575e4f3f77015f56c72	-56.314	0.140122	-5.04597	4.54821e-07	3.83145e-06	-3.20628	Planctomycetes	Phycisphaerae	MSBL9	#N/A	#N/A	B9619_o_MSBL9	Not_predicted	Fer
a4f7dbb9261d728864e9ca3751fb73ca	-48.1424	0.115831	-4.56984	4.90752e-06	3.4006e-05	-3.34679	Planctomycetes	Planctomycetacia	Gemmatales	Gemmataceae	Gemmata	B5513_Gemmata	Not_predicted	Fer
a678d98ffa84ef2d267f775832bd9e83	-35.2055	0.0922758	-3.17386	0.00150633	0.00630511	-4.07665	Planctomycetes	Phycisphaerae	Tepidisphaerales	WD2101 soil group	uncultured Planctomycetia bacterium	B15839_uncultured Planctomycetia bacterium	Not_predicted	Fer
AB240380.1.1479	-71.9061	0.286752	-3.17762	0.00148692	0.00624663	-4.45753	Planctomycetes	Planctomycetacia	Gemmatales	Gemmataceae	Zavarzinella	B4447_Zavarzinella	Not_predicted	Fer
AB989864.1.1448	-38.8005	0.365935	-8.40533	4.52219e-17	1.50922e-15	10.2738	Planctomycetes	Planctomycetacia	Isosphaerales	Isosphaeraceae	uncultured	B5676_uncultured	Not_predicted	Fer
affad16cf53c1854458ee2a73437a2a2	-23.077	0.224356	-3.60894	0.000308135	0.00149065	-2.92867	Planctomycetes	Planctomycetacia	Gemmatales	Gemmataceae	uncultured	B11851_uncultured	Not_predicted	Fer
AM902601.1.1416	-70.8492	0.162722	-2.65444	0.00794984	0.0271117	-4.52884	Planctomycetes	Planctomycetacia	Gemmatales	Gemmataceae	Gemmata	B2363_Gemmata	Not_predicted	Fer
AY963411.1.1470	-41.9137	0.140122	-2.56438	0.0103427	0.0339731	-4.4384	Planctomycetes	Planctomycetacia	Gemmatales	Gemmataceae	uncultured	B5947_uncultured	Not_predicted	Fer
b4dfcaaf7a2a9383bffef8b3e7999020	-16.8256	0.955594	-6.49149	8.6801e-11	1.24922e-09	9.63472	Planctomycetes	vadinHA49	bacterium UW 659-2-F09	bacterium UW 659-2-F09	bacterium UW 659-2-F09	B2073_bacterium UW 659-2-F09	Not_predicted	Fer
b8115bfb733d036c51ec9c317007ad78	-67.5471	0.155138	-2.53072	0.0113897	0.036755	-4.53588	Planctomycetes	Phycisphaerae	Tepidisphaerales	WD2101 soil group	#N/A	B3227_f_WD2101 soil group	Not_predicted	Fer
bab6ddc4f9de86b1cb5f72451c0d764f	-13.5337	0.239297	-2.96424	0.00303752	0.0118972	-2.9721	Planctomycetes	Planctomycetacia	Pirellulales	Pirellulaceae	Candidatus Anammoximicrobium	B6012_Candidatus Anammoximicrobium	Not_predicted	Fer
bf7d4ee5773b609014944e12cc109e54	-42.3916	0.111111	-3.82171	0.000132895	0.000689766	-3.81588	Planctomycetes	Planctomycetacia	Isosphaerales	Isosphaeraceae	Singulisphaera	B16671_Singulisphaera	Not_predicted	Fer
c136fc6a31a409a93913b0d8262d66d7	-29.6976	0.706142	-4.8433	1.28569e-06	1.00033e-05	-1.27112	Planctomycetes	Planctomycetacia	Pirellulales	Pirellulaceae	#N/A	B2438_f_Pirellulaceae	Not_predicted	Fer
ce4f936ed386da1ce6806a95a090e87c	-15.3625	0.482849	-3.18695	0.00143983	0.00606144	-2.78622	Planctomycetes	Phycisphaerae	Tepidisphaerales	WD2101 soil group	planctomycete WWH14	B1535_planctomycete WWH14	Not_predicted	Fer
ce800b7324fe0e2107d8f979dac6e54e	-27.7911	0.0995823	-3.56074	0.000370587	0.00176412	-3.393	Planctomycetes	Pla4 lineage	#N/A	#N/A	#N/A	B17965_o_NA	Not_predicted	Fer
CU925446.1.1356	-47.1908	0.169096	-6.04634	1.50563e-09	1.79982e-08	-0.909317	Planctomycetes	Planctomycetacia	Pirellulales	Pirellulaceae	#N/A	B7103_f_Pirellulaceae	Not_predicted	Fer
da47019039ca8557d4b1dbfb3d73763c	-33.6712	0.21152	-6.78607	1.18152e-11	1.93592e-10	4.22422	Planctomycetes	Pla4 lineage	uncultured planctomycete	uncultured planctomycete	uncultured planctomycete	B6827_uncultured planctomycete	Not_predicted	Fer
DQ444452.1.1345	-35.677	0.327825	-4.69284	2.71055e-06	1.98094e-05	-2.32992	Planctomycetes	Planctomycetacia	Pirellulales	Pirellulaceae	uncultured	B11180_uncultured	Not_predicted	Fer
e59430fcc787fc27ccbdacfeaee034f7	-40.3843	0.144707	-5.17426	2.30824e-07	2.03616e-06	-1.92708	Planctomycetes	Phycisphaerae	Tepidisphaerales	WD2101 soil group	planctomycete WWH14	B12552_planctomycete WWH14	Not_predicted	Fer
e5c104673901bf46c4ad01e4ddc11aef	-23.0206	0.207206	-3.36946	0.000754436	0.00337754	-3.29339	Planctomycetes	Phycisphaerae	Tepidisphaerales	WD2101 soil group	uncultured soil bacterium	B11880_uncultured soil bacterium	Not_predicted	Fer
e7f9def17470fa08b4a159da868f1f43	-32.9305	0.117998	-4.21923	2.4612e-05	0.000149211	-2.86016	Planctomycetes	Phycisphaerae	MSBL9	GWC2-45-44	uncultured bacterium	B15894_uncultured bacterium	Not_predicted	Fer
ef18dd3452d65893b6377c17dce1e38e	-56.314	0.140122	-5.04597	4.54821e-07	3.83145e-06	-3.20628	Planctomycetes	Phycisphaerae	Phycisphaerales	AKAU3564 sediment group	#N/A	B8299_f_AKAU3564 sediment group	Not_predicted	Fer
EU135035.1.1368	-21.763	0.0779821	-2.78839	0.00530164	0.0191232	-3.90304	Planctomycetes	OM190	uncultured bacterium	uncultured bacterium	uncultured bacterium	B3197_uncultured bacterium	Not_predicted	Fer
EU344930.1.1463	-26.9211	0.357681	-3.86244	0.000112581	0.000592357	-2.88942	Planctomycetes	Planctomycetacia	Planctomycetales	uncultured	uncultured Planctomyces sp.	B1216_uncultured Planctomyces sp.	Not_predicted	Fer
EU589267.1.1473	-53.6678	0.133538	-4.80885	1.528e-06	1.16963e-05	-3.33929	Planctomycetes	Planctomycetacia	Gemmatales	Gemmataceae	uncultured	B7381_uncultured	Not_predicted	Fer
f6f735e5cae6cdea228bd3054ad02d24	-55.754	0.146817	-2.80821	0.0049862	0.0180992	-4.46121	Planctomycetes	Planctomycetacia	Gemmatales	Gemmataceae	uncultured	B6990_uncultured	Not_predicted	Fer
f7fee73149056a20a0ed956dc6548210	-31.604	0.276425	-4.5036	6.71546e-06	4.53237e-05	-2.24887	Planctomycetes	Pla3 lineage	uncultured bacterium	uncultured bacterium	uncultured bacterium	B5418_uncultured bacterium	Not_predicted	Fer
f8aa5352deb03e274da94cf0418021f3	-57.2399	0.15073	-2.88305	0.00394227	0.0149461	-4.4529	Planctomycetes	Phycisphaerae	Tepidisphaerales	WD2101 soil group	#N/A	B7344_f_WD2101 soil group	Not_predicted	Fer
fe7ddfa76abec0c961ed8a6be49d5bc4	-36.5973	0.0880535	-3.47393	0.000513874	0.00238924	-3.90215	Planctomycetes	Planctomycetacia	Pirellulales	Pirellulaceae	uncultured	B7979_uncultured	Not_predicted	Fer
FJ232641.1.1338	-23.7863	0.273919	-3.3733	0.000744013	0.00333831	-3.34948	Planctomycetes	Planctomycetacia	Pirellulales	Pirellulaceae	uncultured	B8594_uncultured	Not_predicted	Fer
FJ232688.1.1362	-48.6007	0.304924	-9.79062	1.37376e-22	7.62201e-21	14.0234	Planctomycetes	Planctomycetacia	Isosphaerales	Isosphaeraceae	uncultured	B4651_uncultured	Not_predicted	Fer
FJ484707.1.1382	-54.8959	0.13208	-5.2109	1.8962e-07	1.69499e-06	-2.95177	Planctomycetes	Planctomycetacia	Pirellulales	Pirellulaceae	#N/A	B4048_f_Pirellulaceae	Not_predicted	Fer
FJ538120.1.1524	-19.6396	0.796763	-5.26554	1.4109e-07	1.29279e-06	2.43752	Planctomycetes	Phycisphaerae	mle1-8	#N/A	#N/A	B1329_o_mle1-8	Not_predicted	Fer
FPLM01001439.7.1479	-32.9305	0.117998	-4.21923	2.4612e-05	0.000149211	-2.86016	Planctomycetes	Planctomycetacia	Gemmatales	Gemmataceae	Fimbriiglobus	B15919_Fimbriiglobus	Not_predicted	Fer
FPLM01007033.8.1526	-45.456	0.312112	-4.68505	2.81569e-06	2.04812e-05	-3.07924	Planctomycetes	Planctomycetacia	Planctomycetales	uncultured	metagenome	B7662_metagenome	Not_predicted	Fer
FPLP01000772.15.1519	-43.6153	0.108525	-3.90811	9.32994e-05	0.000499065	-3.7862	Planctomycetes	Planctomycetacia	Pirellulales	Pirellulaceae	Pirellula	B17027_Pirellula	Not_predicted	Fer
FPLP01006931.17.1246	-21.9669	0.215414	-3.30222	0.000960766	0.00420586	-3.30155	Planctomycetes	OM190	metagenome	metagenome	metagenome	B9115_metagenome	Not_predicted	Fer
FPLS01029634.1.1350	-35.388	0.0880535	-3.17091	0.00152168	0.00635615	-4.08324	Planctomycetes	Planctomycetacia	Pirellulales	Pirellulaceae	Pirellula	B19149_Pirellula	Not_predicted	Fer
FQ659287.1.1390	-34.9919	0.341453	-7.57508	3.73046e-14	8.59929e-13	7.41958	Planctomycetes	Phycisphaerae	Phycisphaerales	AKAU3564 sediment group	uncultured soil bacterium	B8019_uncultured soil bacterium	Not_predicted	Fer
GQ264186.1.1436	-42.3916	0.111111	-3.82171	0.000132895	0.000689766	-3.81588	Planctomycetes	Planctomycetacia	Gemmatales	Gemmataceae	uncultured	B9368_uncultured	Not_predicted	Fer
GQ472376.1.1519	-14.7013	0.826898	-5.58002	2.43325e-08	2.50007e-07	5.66498	Planctomycetes	Phycisphaerae	MSBL9	SG8-4	#N/A	B3164_f_SG8-4	Not_predicted	Fer
GQ889425.1.1367	-55.754	0.146817	-2.80821	0.0049862	0.0180992	-4.46121	Planctomycetes	Planctomycetacia	Gemmatales	Gemmataceae	Gemmata	B7438_Gemmata	Not_predicted	Fer
GU127744.1.1446	-50.5846	0.436202	-9.40504	5.69411e-21	2.74306e-19	10.9353	Planctomycetes	Planctomycetacia	Isosphaerales	Isosphaeraceae	Aquisphaera	B902_Aquisphaera	Not_predicted	Fer
GU208285.1.1385	-25.4601	0.280244	-5.31108	1.10035e-07	1.02576e-06	0.92977	Planctomycetes	Phycisphaerae	Phycisphaerales	Phycisphaeraceae	SM1A02	B7034_SM1A02	Not_predicted	Fer
HE646313.1.1423	-38.0961	0.260898	-3.5126	0.000444628	0.00209061	-3.92021	Planctomycetes	Planctomycetacia	Gemmatales	Gemmataceae	Gemmata	B7480_Gemmata	Not_predicted	Fer
HF922336.1.1554	-42.9567	0.143609	-2.62819	0.00858999	0.0289258	-4.42904	Planctomycetes	Phycisphaerae	Pla1 lineage	uncultured soil bacterium	uncultured soil bacterium	B10312_uncultured soil bacterium	Not_predicted	Fer
HM238163.1.1446	-36.7114	0.260176	-3.21206	0.00131977	0.00562071	-4.08998	Planctomycetes	Planctomycetacia	Isosphaerales	Isosphaeraceae	uncultured	B10831_uncultured	Not_predicted	Fer
HM263231.1.1342	-8.24043	0.471233	-2.87145	0.00408984	0.0154256	-2.41311	Planctomycetes	Planctomycetacia	Isosphaerales	Isosphaeraceae	Candidatus Nostocoida	B2604_Candidatus Nostocoida	Not_predicted	Fer
HM318930.1.1350	-33.1362	0.663261	-8.7043	3.41593e-18	1.29628e-16	14.9107	Planctomycetes	Planctomycetacia	Isosphaerales	Isosphaeraceae	uncultured	B1482_uncultured	Not_predicted	Fer
HQ119506.1.1385	-33.693	0.195066	-4.07801	4.55827e-05	0.000261192	-3.12152	Planctomycetes	Planctomycetacia	Gemmatales	Gemmataceae	Gemmata	B15206_Gemmata	Not_predicted	Fer
HQ120759.1.1473	-39.7419	0.300338	-8.24798	1.70027e-16	5.34322e-15	9.02033	Planctomycetes	Planctomycetacia	Gemmatales	Gemmataceae	Gemmata	B6145_Gemmata	Not_predicted	Fer
HQ132384.1.1517	-73.3989	0.176599	-6.96727	3.3227e-12	5.95348e-11	-1.60422	Planctomycetes	Planctomycetacia	Pirellulales	Pirellulaceae	uncultured	B6864_uncultured	Not_predicted	Fer
JF225385.1.1338	-37.0849	0.0922758	-3.32296	0.000892114	0.0039456	-4.02704	Planctomycetes	Planctomycetacia	Planctomycetales	Rubinisphaeraceae	uncultured	B18794_uncultured	Not_predicted	Fer
JQ798435.1.1475	-20.039	0.0718045	-2.5675	0.0102501	0.0336952	-4.02609	Planctomycetes	Planctomycetacia	Isosphaerales	Isosphaeraceae	Singulisphaera	B20574_Singulisphaera	Not_predicted	Fer
JQ978534.1.1483	-22.0216	0.540892	-4.14859	3.35787e-05	0.000197327	-1.70329	Planctomycetes	Planctomycetacia	Pirellulales	Pirellulaceae	Pirellula	B1324_Pirellula	Not_predicted	Fer
JX133598.1.1445	-26.4616	0.13208	-4.49715	6.92236e-06	4.66028e-05	-1.58897	Planctomycetes	Phycisphaerae	Phycisphaerales	Phycisphaeraceae	SM1A02	B12192_SM1A02	Not_predicted	Fer
KC541033.1.1555	-51.3995	0.58225	-10.6945	1.25542e-26	1.04123e-24	18.5432	Planctomycetes	Phycisphaerae	MSBL9	metagenome	metagenome	B1440_metagenome	Not_predicted	Fer
KF037547.1.1466	-20.039	0.0718045	-2.5675	0.0102501	0.0336952	-4.02609	Planctomycetes	Phycisphaerae	Tepidisphaerales	Tepidisphaeraceae	uncultured bacterium	B20584_uncultured bacterium	Not_predicted	Fer
KM200462.1.1490	-52.7434	0.138889	-2.65657	0.00789972	0.0270527	-4.47737	Planctomycetes	Planctomycetacia	Isosphaerales	Isosphaeraceae	Aquisphaera	B13295_Aquisphaera	Not_predicted	Fer
KM205501.1.1466	-82.1975	0.378476	-10.2032	2.17309e-24	1.45688e-22	5.58955	Planctomycetes	Planctomycetacia	Pirellulales	Pirellulaceae	uncultured	B1044_uncultured	Not_predicted	Fer
KM205531.1.1496	-33.5064	0.452436	-7.54978	4.52941e-14	1.02645e-12	7.88176	Planctomycetes	Phycisphaerae	Pla1 lineage	uncultured soil bacterium	uncultured soil bacterium	B3863_uncultured soil bacterium	Not_predicted	Fer
KR107355.1.1432	-68.1936	0.169681	-6.11043	1.01031e-09	1.24471e-08	-2.53033	Planctomycetes	Planctomycetacia	Pirellulales	Pirellulaceae	Blastopirellula	B9456_Blastopirellula	Not_predicted	Fer
LC124526.1.1478	-36.7299	0.26984	-3.70285	0.000213715	0.0010699	-3.71159	Planctomycetes	Pla3 lineage	uncultured soil bacterium PBS-II-37	uncultured soil bacterium PBS-II-37	uncultured soil bacterium PBS-II-37	B2586_uncultured soil bacterium PBS-II-37	Not_predicted	Fer
LC124604.1.1449	-30.2403	0.944054	-10.7729	5.39626e-27	4.66805e-25	33.7307	Planctomycetes	Planctomycetacia	Pirellulales	Pirellulaceae	Pir2 lineage	B2372_Pir2 lineage	Not_predicted	Fer
LC124680.1.1456	-44.1925	0.115831	-3.98406	6.79659e-05	0.000376056	-3.74297	Planctomycetes	Phycisphaerae	MSBL9	4572-13	uncultured bacterium	B7321_uncultured bacterium	Not_predicted	Fer
LC124685.1.1457	-69.9225	0.160593	-2.61972	0.00880635	0.0295528	-4.53085	Planctomycetes	Phycisphaerae	MSBL9	SG8-4	metagenome	B6808_metagenome	Not_predicted	Fer
03919ddd8fccc859cecbb147b4aef8ad	-59.4911	0.198885	-3.6398	0.000273471	0.00133743	-4.24989	Proteobacteria	Deltaproteobacteria	Myxococcales	Haliangiaceae	Haliangium	B6288_Haliangium	Not_predicted	Fer
06140d30cc6b7e74d212b9ed304c6040	-61.6294	0.32969	-5.39757	6.82492e-08	6.55208e-07	-3.06068	Proteobacteria	Gammaproteobacteria	Diplorickettsiales	Diplorickettsiaceae	Aquicella	B6870_Aquicella	Not_predicted	Fer
0875c7775a9cbb74da31a024582c8871	-54.7904	0.143609	-4.93949	7.89025e-07	6.30358e-06	-3.25241	Proteobacteria	Deltaproteobacteria	Myxococcales	Haliangiaceae	Haliangium	B3220_Haliangium	Not_predicted	Fer
0d5b32c6e79e5fe545b6abf565e96516	-52.0027	0.136303	-4.68818	2.77302e-06	2.01891e-05	-3.39163	Proteobacteria	Gammaproteobacteria	Diplorickettsiales	Diplorickettsiaceae	uncultured	B8999_uncultured	Not_predicted	Fer
14b06bc0a54e9cc7cf81c4a063cf8822	-39.7933	0.289267	-3.75388	0.000174565	0.000888844	-3.78351	Proteobacteria	Deltaproteobacteria	Deltaproteobacteria Incertae Sedis	Syntrophorhabdaceae	Syntrophorhabdus	B9069_Syntrophorhabdus	Not_predicted	Fer
173e8ad8503b6e59d91ad3c23741ed71	-72.6028	0.191185	-3.65684	0.000255935	0.0012601	-4.3542	Proteobacteria	Deltaproteobacteria	Myxococcales	BIrii41	#N/A	B5712_f_BIrii41	Not_predicted	Fer
178da77b35640c11e786786cffd7d8b6	-44.6547	0.111111	-4.00125	6.32153e-05	0.000352927	-3.74427	Proteobacteria	Deltaproteobacteria	NKB15	uncultured bacterium	uncultured bacterium	B11035_uncultured bacterium	Not_predicted	Fer
188eb148ac65629de520c931046d1813	-31.796	0.14248	-3.65704	0.000255737	0.00125989	-3.523	Proteobacteria	#N/A	#N/A	#N/A	#N/A	B17397_o_NA	Not_predicted	Fer
199f46601bb2e2faf4438e81d1ff4e14	-30.5922	0.312145	-5.10089	3.40873e-07	2.93925e-06	-0.773806	Proteobacteria	Deltaproteobacteria	Desulfobacterales	Desulfobulbaceae	#N/A	B1837_f_Desulfobulbaceae	Not_predicted	Fer
1b1e73595ca7cfc828f1debfbaffe6d0	-31.7589	0.307689	-5.38538	7.30332e-08	6.96152e-07	-0.21504	Proteobacteria	Deltaproteobacteria	MBNT15	uncultured prokaryote	uncultured prokaryote	B6784_uncultured prokaryote	Not_predicted	Fer
1bdec12f933e17215a0c9d3c7b2e427e	-66.4411	0.159858	-6.3068	2.90272e-10	3.87913e-09	-2.15655	Proteobacteria	Deltaproteobacteria	Myxococcales	#N/A	#N/A	B8927_o_Myxococcales	Not_predicted	Fer
212c0bbefd1cac2416bca356cca2cb27	-39.9397	0.0960953	-3.79121	0.000150318	0.000772721	-3.75693	Proteobacteria	Gammaproteobacteria	#N/A	#N/A	#N/A	B18132_o_NA	Not_predicted	Fer
24f3ce05459d1bba57d8e830db6bbbf3	-51.5941	0.172485	-3.15665	0.00159809	0.00663399	-4.34267	Proteobacteria	Gammaproteobacteria	Coxiellales	Coxiellaceae	Coxiella	B4655_Coxiella	Not_predicted	Fer
25288e2bfa18afa7c5fe1d6bb5cf7b2b	-52.2602	0.137617	-2.63223	0.00848848	0.0287173	-4.47988	Proteobacteria	Gammaproteobacteria	Coxiellales	Coxiellaceae	Coxiella	B12211_Coxiella	Not_predicted	Fer
262e9dc0a7d49c40e036fb2d516cb797	-22.7416	0.377438	-3.31422	0.000920469	0.00405319	-3.34845	Proteobacteria	Deltaproteobacteria	Myxococcales	Phaselicystidaceae	Phaselicystis	B3288_Phaselicystis	Not_predicted	Fer
285e95b82fd04bc3364d4459a3ae1fbb	-33.5041	0.120054	-4.29273	1.77244e-05	0.000110366	-2.79508	Proteobacteria	Gammaproteobacteria	Methylococcales	Methylococcaceae	#N/A	B15509_f_Methylococcaceae	Not_predicted	Fer
29671872f033f7103fc2a3b988d337ba	-25.4563	0.308425	-3.94416	8.03291e-05	0.000436949	-2.59915	Proteobacteria	Gammaproteobacteria	uncultured	uncultured bacterium	uncultured bacterium	B9140_uncultured bacterium	Not_predicted	Fer
29af79bad052ac9a2b8cf12ce7de0857	-65.1592	0.156774	-6.18512	6.31461e-10	8.12817e-09	-2.25231	Proteobacteria	Gammaproteobacteria	Coxiellales	Coxiellaceae	Coxiella	B10942_Coxiella	Not_predicted	Fer
2de9d34656dd1d545a88636463d2957f	-46.1806	0.111111	-4.38362	1.17266e-05	7.55932e-05	-3.45183	Proteobacteria	Deltaproteobacteria	Myxococcales	Sandaracinaceae	uncultured	B11359_uncultured	Not_predicted	Fer
2f41886c67819685c674c537a4176219	-65.489	0.157567	-6.21643	5.17717e-10	6.73953e-09	-2.22785	Proteobacteria	Deltaproteobacteria	Myxococcales	uncultured	uncultured Archangiaceae bacterium	B6180_uncultured Archangiaceae bacterium	Not_predicted	Fer
2fe4482029d1a447457740e1860e7a02	-73.3661	0.168502	-2.74874	0.00598744	0.0212854	-4.52324	Proteobacteria	Deltaproteobacteria	Myxococcales	uncultured	#N/A	B9531_f_uncultured	Not_predicted	Fer
33aabd31de615036f032aa7175e646e7	-65.3212	0.266353	-2.83775	0.00454741	0.0168279	-4.49197	Proteobacteria	Gammaproteobacteria	Methylococcales	Methylococcaceae	#N/A	B7232_f_Methylococcaceae	Not_predicted	Fer
3761ac59cd1085f9720827e7b61e8c54	-55.2093	0.144707	-4.97725	6.49797e-07	5.3343e-06	-3.23086	Proteobacteria	Deltaproteobacteria	Myxococcales	Sandaracinaceae	uncultured	B8491_uncultured	Not_predicted	Fer
46c642c15797110406b31e895818c269	-66.0911	0.22095	-4.04361	5.28142e-05	0.000297334	-4.16223	Proteobacteria	Deltaproteobacteria	MBNT15	uncultured proteobacterium	uncultured proteobacterium	B4478_uncultured proteobacterium	Not_predicted	Fer
4dee402c8be162da5f05516a13dd7fc3	-77.0452	0.202883	-3.8806	0.000104503	0.000552744	-4.32131	Proteobacteria	Gammaproteobacteria	Betaproteobacteriales	#N/A	#N/A	B3231_o_Betaproteobacteriales	Not_predicted	Fer
4e9015339dd2711ce3d442127f89f54e	-52.9895	0.138889	-4.77714	1.78955e-06	1.35437e-05	-3.34318	Proteobacteria	Gammaproteobacteria	Legionellales	Legionellaceae	Legionella	B13186_Legionella	Not_predicted	Fer
5087129c7950de57cd07afe8b83c3863	-37.7714	0.590981	-7.58266	3.51917e-14	8.18259e-13	6.42629	Proteobacteria	Deltaproteobacteria	Myxococcales	UASB-TL25	uncultured delta proteobacterium	B1411_uncultured delta proteobacterium	Not_predicted	Fer
5136bfe3368ecd26f423442d9a3098b6	-75.3674	0.344705	-4.95187	7.40462e-07	5.95107e-06	-3.83639	Proteobacteria	Deltaproteobacteria	Myxococcales	Phaselicystidaceae	Phaselicystis	B920_Phaselicystis	Not_predicted	Fer
53387f58684635bf8f7f8d115be24aae	-42.2715	0.141318	-2.58627	0.00970844	0.0322612	-4.43522	Proteobacteria	Deltaproteobacteria	Myxococcales	P3OB-42	uncultured bacterium	B12886_uncultured bacterium	Not_predicted	Fer
548be8ddaaa6c3dfca5e04c9da34fcab	-46.1806	0.111111	-4.38362	1.17266e-05	7.55932e-05	-3.45183	Proteobacteria	Alphaproteobacteria	uncultured	uncultured Acetobacteraceae bacterium	uncultured Acetobacteraceae bacterium	B16563_uncultured Acetobacteraceae bacterium	Not_predicted	Fer
5854f37077ba962c23fa8b8876f1b8c7	-44.6547	0.111111	-4.00125	6.32153e-05	0.000352927	-3.74427	Proteobacteria	Alphaproteobacteria	Azospirillales	Inquilinaceae	Inquilinus	B16035_Inquilinus	Not_predicted	Fer
5cff7775e0c06e4da8529719e92f204b	-9.842	0.643932	-3.62628	0.000288184	0.00140023	-0.670124	Proteobacteria	Deltaproteobacteria	SAR324 clade(Marine group B)	uncultured bacterium zdt-33i5	uncultured bacterium zdt-33i5	B4238_uncultured bacterium zdt-33i5	Not_predicted	Fer
5d465b7222e64d2a51d1b302aa590024	-45.8951	0.153432	-2.80797	0.00498993	0.0180992	-4.40143	Proteobacteria	Gammaproteobacteria	Diplorickettsiales	Diplorickettsiaceae	Aquicella	B11370_Aquicella	Not_predicted	Fer
5fa35093aadec6611fe3ea9cce17e736	-58.3842	0.209205	-7.4805	7.68122e-14	1.70235e-12	1.10844	Proteobacteria	Deltaproteobacteria	Myxococcales	BIrii41	#N/A	B5393_f_BIrii41	Not_predicted	Fer
60179450d899b11a902edbfef4e21459	-35.4083	0.317989	-5.37313	7.81689e-08	7.42466e-07	-0.865412	Proteobacteria	Gammaproteobacteria	Coxiellales	Coxiellaceae	Coxiella	B7502_Coxiella	Not_predicted	Fer
611dba1463fd8c733a84c5215c7fc134	-30.7006	0.270314	-4.51783	6.28021e-06	4.26726e-05	-2.11776	Proteobacteria	Deltaproteobacteria	Bdellovibrionales	Bacteriovoracaceae	Peredibacter	B6125_Peredibacter	Not_predicted	Fer
660a6909f35ae87867d352bf6d4f0b53	-36.5973	0.0880535	-3.47393	0.000513874	0.00238924	-3.90215	Proteobacteria	Deltaproteobacteria	Syntrophobacterales	Syntrophaceae	Desulfomonile	B18949_Desulfomonile	Not_predicted	Fer
6b44b1e2ff8fd18eebd6163a5cd56e8c	-26.3746	0.171387	-3.02308	0.00250504	0.0100065	-3.89681	Proteobacteria	Deltaproteobacteria	Oligoflexales	Oligoflexaceae	Oligoflexus	B10188_Oligoflexus	Not_predicted	Fer
6be603d1ac48baf753c82adf6d982694	-71.0076	0.378839	-9.64706	5.59147e-22	2.94009e-20	5.88467	Proteobacteria	Deltaproteobacteria	Desulfarculales	Desulfarculaceae	uncultured	B4531_uncultured	Not_predicted	Fer
6d64af0aaa9ed57575616b9e5b35f14c	-48.4373	0.428227	-8.49309	2.13783e-17	7.34993e-16	7.09667	Proteobacteria	Deltaproteobacteria	Deltaproteobacteria Incertae Sedis	Unknown Family	Deferrisoma	B6242_Deferrisoma	Not_predicted	Fer
70b1771d26ec1d1e56236c7683609cc1	-11.0763	1.63667	-4.80706	1.54173e-06	1.17901e-05	3.38531	Proteobacteria	Gammaproteobacteria	Diplorickettsiales	Diplorickettsiaceae	Aquicella	B1444_Aquicella	Not_predicted	Fer
73534240e0d30e66d139356bc505307e	-30.3321	0.186507	-4.63734	3.54949e-06	2.52705e-05	-1.82727	Proteobacteria	Deltaproteobacteria	SAR324 clade(Marine group B)	uncultured bacterium	uncultured bacterium	B15307_uncultured bacterium	Not_predicted	Fer
74a0eecac8d11c3ca45b0e3efee5bba8	-45.0191	0.117998	-4.05859	4.95414e-05	0.000280676	-3.70848	Proteobacteria	Deltaproteobacteria	Myxococcales	P3OB-42	#N/A	B9849_f_P3OB-42	Not_predicted	Fer
7a296921803e56f6e731ff32ca8974ed	-50.9479	0.133538	-4.59308	4.39176e-06	3.08574e-05	-3.44241	Proteobacteria	Deltaproteobacteria	Myxococcales	KD3-10	uncultured delta proteobacterium	B13910_uncultured delta proteobacterium	Not_predicted	Fer
7d78b885286f632536411c41af3e81c6	-73.6008	0.177084	-6.98643	2.90004e-12	5.26656e-11	-1.58738	Proteobacteria	Deltaproteobacteria	Myxococcales	#N/A	#N/A	B6652_o_Myxococcales	Not_predicted	Fer
7f618da40beee55e385be6e4f2e12aaf	-43.3185	0.113541	-3.90527	9.43999e-05	0.000501948	-3.77873	Proteobacteria	Alphaproteobacteria	Rhizobiales	Rhodomicrobiaceae	Rhodomicrobium	B6949_Rhodomicrobium	Not_predicted	Fer
7fc7c367a884b2e90812315509eb126c	-78.2919	0.188371	-7.43172	1.11104e-13	2.39634e-12	-1.1829	Proteobacteria	Deltaproteobacteria	Syntrophobacterales	Syntrophaceae	Desulfomonile	B7292_Desulfomonile	Not_predicted	Fer
817e18a89c3ed9f9e37a381beaf78555	-20.773	0.345724	-5.06209	4.18023e-07	3.54372e-06	1.3133	Proteobacteria	Deltaproteobacteria	Myxococcales	#N/A	#N/A	B3937_o_Myxococcales	Not_predicted	Fer
84f076c3b7317e269f4bfffaf4a43ba0	-60.5771	0.15073	-5.42796	5.76046e-08	5.59697e-07	-2.97855	Proteobacteria	Deltaproteobacteria	Myxococcales	Sandaracinaceae	Sandaracinus	B11718_Sandaracinus	Not_predicted	Fer
86344505cfadf8cf22ec38043ba6efe0	-47.2606	0.123873	-4.26066	2.04669e-05	0.000126045	-3.61175	Proteobacteria	Deltaproteobacteria	Syntrophobacterales	Syntrophaceae	Desulfomonile	B15089_Desulfomonile	Not_predicted	Fer
866b3c4e5f99cc4365ebaa0aa868d132	-9.11254	0.226942	-3.04152	0.00235667	0.00948443	-2.14372	Proteobacteria	Gammaproteobacteria	#N/A	#N/A	#N/A	B8427_o_NA	Not_predicted	Fer
866f20247ab418bfd7ac8bd8b4a4765b	-20.111	0.156774	-3.02525	0.00248711	0.00994474	-3.53322	Proteobacteria	Deltaproteobacteria	SAR324 clade(Marine group B)	uncultured bacterium	uncultured bacterium	B11267_uncultured bacterium	Not_predicted	Fer
8998e3398957ba074b13d0caab13d671	-62.3437	0.163407	-5.62044	1.9278e-08	2.01418e-07	-2.83867	Proteobacteria	Gammaproteobacteria	Coxiellales	Coxiellaceae	Coxiella	B4164_Coxiella	Not_predicted	Fer
8bc444784883298a5394c49967fde0c0	-72.9834	0.454677	-10.0954	6.52727e-24	4.13479e-22	7.21523	Proteobacteria	Gammaproteobacteria	Coxiellales	Coxiellaceae	Coxiella	B3834_Coxiella	Not_predicted	Fer
8be2bd07dd259cbe9dcfcbf3e271997c	-35.0819	0.219636	-4.12459	3.72753e-05	0.000216676	-3.15448	Proteobacteria	Gammaproteobacteria	Diplorickettsiales	Diplorickettsiaceae	uncultured	B9476_uncultured	Not_predicted	Fer
8be4ac9926bb6474c3eff34bdec88831	-46.5494	0.122009	-4.19654	2.72087e-05	0.00016311	-3.64296	Proteobacteria	Deltaproteobacteria	Myxococcales	Haliangiaceae	Haliangium	B8328_Haliangium	Not_predicted	Fer
8cfd3316740291b6695274c1cb7f4074	-56.4013	0.147831	-5.08471	3.71197e-07	3.17015e-06	-3.16865	Proteobacteria	Deltaproteobacteria	Oligoflexales	0319-6G20	#N/A	B12118_f_0319-6G20	Not_predicted	Fer
91ea9c55bafa2fdc3f273fdb2c2d65a2	-54.233	0.134944	-4.8595	1.18494e-06	9.25519e-06	-3.31142	Proteobacteria	Alphaproteobacteria	Elsterales	uncultured	#N/A	B13729_f_uncultured	Not_predicted	Fer
9563a6cf7bffa017716445304ec2831e	-79.0543	0.207206	-7.12694	1.05789e-12	2.03121e-11	-1.73372	Proteobacteria	Gammaproteobacteria	Methylococcales	Methylomonaceae	Methylomicrobium	B5555_Methylomicrobium	Not_predicted	Fer
9671e6a664781b66b7bda50614d46909	-45.0359	0.237199	-6.14036	8.3743e-10	1.05103e-08	-0.403528	Proteobacteria	Deltaproteobacteria	Deltaproteobacteria Incertae Sedis	Unknown Family	Deferrisoma	B3319_Deferrisoma	Not_predicted	Fer
97e36e85faeef6a73cde54f4babbf016	-50.7507	0.42594	-10.3449	5.03464e-25	3.5844e-23	16.5176	Proteobacteria	Gammaproteobacteria	Coxiellales	Coxiellaceae	Coxiella	B2361_Coxiella	Not_predicted	Fer
98f44f4c3d226af5a02aff8112e0e6f6	-85.0655	0.195373	-3.18706	0.00143925	0.00606144	-4.49467	Proteobacteria	Alphaproteobacteria	Acetobacterales	Acetobacteraceae	#N/A	B6621_f_Acetobacteraceae	Not_predicted	Fer
9c845a5d4570538b400d67fff545b65b	-36.3209	0.443892	-3.28886	0.00100751	0.00438844	-4.02953	Proteobacteria	Deltaproteobacteria	Myxococcales	Sandaracinaceae	uncultured	B2537_uncultured	Not_predicted	Fer
a23b8a2c6caff3f7d96962a448fce578	-17.5489	0.772331	-3.50963	0.000449632	0.00211044	-2.43916	Proteobacteria	Deltaproteobacteria	Desulfovibrionales	Desulfovibrionaceae	Desulfovibrio	B2538_Desulfovibrio	Not_predicted	Fer
AB240264.1.1516	-51.901	0.864902	-11.1963	5.08989e-29	4.99368e-27	21.8782	Proteobacteria	Deltaproteobacteria	Myxococcales	Archangiaceae	Anaeromyxobacter	B735_Anaeromyxobacter	Not_predicted	Fer
AB240311.1.1493	-72.0779	0.189803	-3.63041	0.000283614	0.00137949	-4.35796	Proteobacteria	Gammaproteobacteria	Methylococcales	Methylomonaceae	#N/A	B2658_f_Methylomonaceae	Not_predicted	Fer
AB252957.1.1518	-39.9441	0.133538	-2.44387	0.0145383	0.045211	-4.45546	Proteobacteria	Deltaproteobacteria	Desulfarculales	Desulfarculaceae	uncultured	B5842_uncultured	Not_predicted	Fer
AB294335.1.1422	-27.6714	0.406371	-5.50139	3.81013e-08	3.83156e-07	1.02238	Proteobacteria	Deltaproteobacteria	Bdellovibrionales	Bdellovibrionaceae	Bdellovibrio	B9620_Bdellovibrio	Not_predicted	Fer
AB307660.1.1389	-48.591	0.12736	-4.3806	1.18901e-05	7.65246e-05	-3.55212	Proteobacteria	Alphaproteobacteria	Micropepsales	Micropepsaceae	Rhizomicrobium	B6348_Rhizomicrobium	Not_predicted	Fer
AB364730.1.1482	-78.5538	0.442853	-6.71109	1.97866e-11	3.15839e-10	-2.29551	Proteobacteria	Deltaproteobacteria	Syntrophobacterales	Syntrophobacteraceae	Syntrophobacter	B766_Syntrophobacter	Not_predicted	Fer
AB364744.1.1490	-10.5858	1.22908	-4.21413	2.5174e-05	0.000151818	1.14148	Proteobacteria	Deltaproteobacteria	Syntrophobacterales	Syntrophaceae	uncultured	B560_uncultured	Not_predicted	Fer
AB364752.1.1488	-32.8876	0.330747	-8.30917	1.01883e-16	3.26552e-15	12.4958	Proteobacteria	Deltaproteobacteria	RCP2-54	uncultured Syntrophobacterales bacterium	uncultured Syntrophobacterales bacterium	B3103_uncultured Syntrophobacterales bacterium	Not_predicted	Fer
AB486113.1.1371	-12.0176	1.27127	-4.75406	2.00632e-06	1.50567e-05	2.85333	Proteobacteria	Deltaproteobacteria	Myxococcales	Archangiaceae	Anaeromyxobacter	B260_Anaeromyxobacter	Not_predicted	Fer
AB486572.1.1389	-85.3237	0.460712	-8.57367	1.06742e-17	3.81661e-16	0.441859	Proteobacteria	Deltaproteobacteria	Desulfuromonadales	Geobacteraceae	Geobacter	B435_Geobacter	Not_predicted	Fer
AB486585.1.1391	-48.5938	0.551004	-7.123	1.08852e-12	2.08504e-11	1.74724	Proteobacteria	Deltaproteobacteria	Myxococcales	P3OB-42	uncultured bacterium	B1629_uncultured bacterium	Not_predicted	Fer
AB487448.1.1322	-48.562	0.410752	-7.463	8.77119e-14	1.91751e-12	2.88189	Proteobacteria	Alphaproteobacteria	Rhizobiales	Hyphomicrobiaceae	Pedomicrobium	B5689_Pedomicrobium	Not_predicted	Fer
AB552893.1.1393	-115.67	0.736912	-17.1967	7.57316e-66	2.03087e-62	33.8835	Proteobacteria	Gammaproteobacteria	Betaproteobacteriales	Burkholderiaceae	Acidovorax	B846_Acidovorax	Not_predicted	Fer
AB608683.1.1479	-78.3808	0.73721	-17.8862	4.81139e-71	3.87076e-67	67.8024	Proteobacteria	Deltaproteobacteria	Myxococcales	Archangiaceae	Anaeromyxobacter	B1133_Anaeromyxobacter	Not_predicted	Fer
AB661534.1.1493	-24.4748	0.859394	-8.53771	1.45643e-17	5.07227e-16	18.9435	Proteobacteria	Deltaproteobacteria	Sva0485	uncultured prokaryote	uncultured prokaryote	B2699_uncultured prokaryote	Not_predicted	Fer
AB672131.1.1453	-59.2403	0.850874	-13.4671	3.55439e-41	1.1438e-38	36.1475	Proteobacteria	Gammaproteobacteria	Betaproteobacteriales	SC-I-84	#N/A	B906_f_SC-I-84	Not_predicted	Fer
AB722201.1.1308	-86.6371	0.227081	-7.81055	5.94757e-15	1.54349e-13	-1.14619	Proteobacteria	Alphaproteobacteria	Rhizobiales	Xanthobacteraceae	Pseudolabrys	B4068_Pseudolabrys	Not_predicted	Fer
AB930629.1.1458	-90.3535	0.298327	-7.74676	9.83252e-15	2.47971e-13	-1.4929	Proteobacteria	Gammaproteobacteria	Methylococcales	Methylococcaceae	Methylocaldum	B8629_Methylocaldum	Not_predicted	Fer
acd39506debb50fed27e70c0d8dfe18c	-77.1967	0.185736	-7.32776	2.42094e-13	5.01971e-12	-1.27956	Proteobacteria	Deltaproteobacteria	Myxococcales	Haliangiaceae	Haliangium	B7592_Haliangium	Not_predicted	Fer
AF159119.1.1491	-42.2885	0.244827	-5.1206	3.07123e-07	2.65678e-06	-2.20931	Proteobacteria	Deltaproteobacteria	Desulfovibrionales	Desulfovibrionaceae	Desulfovibrio	B10975_Desulfovibrio	Not_predicted	Fer
AF289151.1.1420	-40.3648	0.134944	-2.46961	0.0135335	0.0424308	-4.45188	Proteobacteria	Alphaproteobacteria	Caulobacterales	Caulobacteraceae	Asticcacaulis	B13758_Asticcacaulis	Not_predicted	Fer
AF323771.1.1464	-47.3541	0.169681	-6.06726	1.32239e-09	1.6022e-08	-0.88296	Proteobacteria	Deltaproteobacteria	Syntrophobacterales	Syntrophaceae	Syntrophus	B9408_Syntrophus	Not_predicted	Fer
AF523966.1.1290	-60.9991	0.375661	-6.68391	2.3821e-11	3.73567e-10	-1.08339	Proteobacteria	Deltaproteobacteria	Syntrophobacterales	Syntrophaceae	Syntrophus	B1532_Syntrophus	Not_predicted	Fer
AF523968.1.1339	-39.5194	0.669361	-6.69941	2.14318e-11	3.39408e-10	2.28411	Proteobacteria	Deltaproteobacteria	Desulfuromonadales	Geobacteraceae	Geobacter	B178_Geobacter	Not_predicted	Fer
AJ295558.1.1304	-34.4672	0.217049	-2.6817	0.00733038	0.0254157	-4.32383	Proteobacteria	Alphaproteobacteria	Rhizobiales	Xanthobacteraceae	Pseudolabrys	B4755_Pseudolabrys	Not_predicted	Fer
AJ518770.1.1242	-22.7071	1.8984	-8.64097	5.947e-18	2.21498e-16	20.8834	Proteobacteria	Alphaproteobacteria	Rhizobiales	Xanthobacteraceae	Pseudolabrys	B43_Pseudolabrys	Not_predicted	Fer
AJ518797.1.1339	-54.2754	0.531394	-11.9903	5.06403e-33	7.54446e-31	26.6352	Proteobacteria	Deltaproteobacteria	Myxococcales	Archangiaceae	Anaeromyxobacter	B1474_Anaeromyxobacter	Not_predicted	Fer
AJ519662.1.1273	-63.2087	0.653763	-9.8139	1.09205e-22	6.14375e-21	8.64573	Proteobacteria	Gammaproteobacteria	Xanthomonadales	Xanthomonadaceae	Arenimonas	B1486_Arenimonas	Not_predicted	Fer
AJ581583.1.1440	-41.2563	0.147831	-5.28597	1.26229e-07	1.16192e-06	-1.80554	Proteobacteria	Alphaproteobacteria	Elsterales	uncultured	uncultured proteobacterium	B4956_uncultured proteobacterium	Not_predicted	Fer
AM162448.1.1453	-38.7239	0.879561	-7.41885	1.22421e-13	2.63337e-12	5.35578	Proteobacteria	Alphaproteobacteria	Rhizobiales	Xanthobacteraceae	#N/A	B144_f_Xanthobacteraceae	Not_predicted	Fer
AM162453.1.1519	-36.1477	0.227632	-2.81245	0.0049209	0.0179622	-4.29211	Proteobacteria	Deltaproteobacteria	Myxococcales	Archangiaceae	Anaeromyxobacter	B1010_Anaeromyxobacter	Not_predicted	Fer
AM490653.1.1511	-70.1682	0.174595	-6.28736	3.28969e-10	4.36005e-09	-2.40548	Proteobacteria	Deltaproteobacteria	Syntrophobacterales	Syntrophaceae	Desulfomonile	B2797_Desulfomonile	Not_predicted	Fer
AM490751.1.1517	-54.7115	0.556164	-12.6379	1.74717e-36	3.90444e-34	31.8744	Proteobacteria	Deltaproteobacteria	Syntrophobacterales	Syntrophobacteraceae	uncultured	B1035_uncultured	Not_predicted	Fer
AM935362.1.1351	-80.1424	0.472217	-15.3807	4.16819e-53	2.79442e-50	39.0322	Proteobacteria	Gammaproteobacteria	Betaproteobacteriales	Burkholderiaceae	Ramlibacter	B1604_Ramlibacter	Not_predicted	Fer
AM991117.1.1400	-33.4095	0.28672	-4.84693	1.26243e-06	9.83182e-06	-1.78111	Proteobacteria	Alphaproteobacteria	Acetobacterales	Acetobacteraceae	Roseomonas	B9290_Roseomonas	Not_predicted	Fer
AY177804.1.1516	-18.9686	0.300383	-4.57915	4.6943e-06	3.27542e-05	0.134343	Proteobacteria	Deltaproteobacteria	Sva0485	uncultured Desulfuromonadales bacterium	uncultured Desulfuromonadales bacterium	B9485_uncultured Desulfuromonadales bacterium	Not_predicted	Fer
AY221614.1.1553	-55.754	0.146817	-2.80821	0.0049862	0.0180992	-4.46121	Proteobacteria	Deltaproteobacteria	Syntrophobacterales	Syntrophaceae	uncultured	B4862_uncultured	Not_predicted	Fer
AY234650.1.1342	-52.2602	0.137617	-2.63223	0.00848848	0.0287173	-4.47988	Proteobacteria	Alphaproteobacteria	Elsterales	URHD0088	bacterium Ellin5299	B4635_bacterium Ellin5299	Not_predicted	Fer
AY586399.1.1421	-67.3645	0.603176	-12.4061	3.17532e-35	6.23059e-33	22.2589	Proteobacteria	Deltaproteobacteria	Syntrophobacterales	Syntrophaceae	Smithella	B2955_Smithella	Not_predicted	Fer
b45a0c1742ec5cf276998273d3a31ea7	-109.389	0.297642	-5.9827	2.22863e-09	2.62508e-08	-3.80111	Proteobacteria	Deltaproteobacteria	Deltaproteobacteria Incertae Sedis	Unknown Family	Deferrisoma	B5717_Deferrisoma	Not_predicted	Fer
b47026b62f0e420ac785ff711e06ae96	-50.4029	0.168502	-3.08377	0.00204651	0.00835745	-4.35552	Proteobacteria	Deltaproteobacteria	Syntrophobacterales	Syntrophaceae	Desulfomonile	B9554_Desulfomonile	Not_predicted	Fer
b66850e6cb1764f8b95a663a45b3da34	-53.614	0.128996	-5.08922	3.62495e-07	3.1019e-06	-3.03073	Proteobacteria	Gammaproteobacteria	Gammaproteobacteria Incertae Sedis	Unknown Family	#N/A	B14501_f_Unknown Family	Not_predicted	Fer
bb91583cfad10072eefca45cd84d8887	-47.1198	0.222534	-5.03499	4.81635e-07	4.04041e-06	-2.72103	Proteobacteria	Deltaproteobacteria	Myxococcales	KD3-10	uncultured delta proteobacterium	B8010_uncultured delta proteobacterium	Not_predicted	Fer
bd3ac6cd4ae33871c257ec358a616dc1	-60.422	0.159109	-3.04332	0.00234257	0.00943712	-4.43437	Proteobacteria	Deltaproteobacteria	Myxococcales	Blfdi19	metagenome	B10718_metagenome	Not_predicted	Fer
bebcb33e7e9037bee0964d1d45ebb6fe	-38.4056	0.137617	-4.92073	8.68462e-07	6.89031e-06	-2.19328	Proteobacteria	Alphaproteobacteria	Acetobacterales	Acetobacteraceae	uncultured	B13398_uncultured	Not_predicted	Fer
c4d1b25c879c5080e14fd8ea17f6f5e0	-29.9527	0.373823	-6.3341	2.4335e-10	3.30143e-09	3.5019	Proteobacteria	Deltaproteobacteria	Myxococcales	Haliangiaceae	Haliangium	B6353_Haliangium	Not_predicted	Fer
cbf5b44e151dfd2b0bbd322f60afc8c7	-37.9931	0.0995823	-3.42517	0.000615535	0.00280089	-3.98123	Proteobacteria	Alphaproteobacteria	Sphingomonadales	Sphingomonadaceae	#N/A	B17963_f_Sphingomonadaceae	Not_predicted	Fer
CP003360.3288170.3289606	-32.5825	1.41352	-5.60905	2.05879e-08	2.13716e-07	0.270624	Proteobacteria	Deltaproteobacteria	Syntrophobacterales	Syntrophaceae	Desulfomonile	B481_Desulfomonile	Not_predicted	Fer
d094b2e8c34cab09393f121eda341524	-36.0423	0.339939	-7.90782	2.74182e-15	7.42691e-14	8.72337	Proteobacteria	Deltaproteobacteria	#N/A	#N/A	#N/A	B6601_o_NA	Not_predicted	Fer
d129b6fec77aee9431ff108d393c0069	-16.0007	0.644628	-5.62773	1.84816e-08	1.93348e-07	5.37947	Proteobacteria	Gammaproteobacteria	Methylococcales	Methylococcaceae	Candidatus Methylospira	B5874_Candidatus Methylospira	Not_predicted	Fer
d254916b9964e2d17925cf6e07185c5f	-29.5488	0.830303	-7.18415	6.97815e-13	1.36592e-11	7.61553	Proteobacteria	Deltaproteobacteria	Myxococcales	#N/A	#N/A	B1761_o_Myxococcales	Not_predicted	Fer
d43c460319e251b6dce7c93bcfb0faf2	-60.6724	0.217404	-7.77367	7.95724e-15	2.03873e-13	1.57359	Proteobacteria	Deltaproteobacteria	Myxococcales	Polyangiaceae	Pajaroellobacter	B4728_Pajaroellobacter	Not_predicted	Fer
d585372afdb930bd4297bf4bd65f89ca	-50.1375	0.162025	-4.58163	4.63898e-06	3.24245e-05	-3.42079	Proteobacteria	Deltaproteobacteria	Myxococcales	mle1-27	#N/A	B6684_f_mle1-27	Not_predicted	Fer
d7280e50ed3d8fd304c2047e1614565c	-35.4776	0.372784	-8.74553	2.37599e-18	9.27905e-17	13.9174	Proteobacteria	Deltaproteobacteria	Myxococcales	Sandaracinaceae	uncultured	B5535_uncultured	Not_predicted	Fer
d7fc7039da4fc8d4fd48fe9e1c1b339e	-80.784	0.212728	-4.06891	4.73974e-05	0.000270243	-4.29211	Proteobacteria	Deltaproteobacteria	Syntrophobacterales	Syntrophobacteraceae	Syntrophobacter	B5085_Syntrophobacter	Not_predicted	Fer
d9ef50d780131e3f1a11c3129c58b769	-44.2534	0.201331	-3.91508	9.06455e-05	0.000485838	-3.80117	Proteobacteria	Alphaproteobacteria	Rhodospirillales	uncultured	uncultured soil bacterium	B13964_uncultured soil bacterium	Not_predicted	Fer
DQ018792.1.1291	-50.6075	0.386261	-5.24996	1.53546e-07	1.40213e-06	-2.6502	Proteobacteria	Alphaproteobacteria	Sphingomonadales	Sphingomonadaceae	Novosphingobium	B1153_Novosphingobium	Not_predicted	Fer
DQ066945.1.1383	-51.2688	0.609138	-7.50915	6.17761e-14	1.3729e-12	2.46167	Proteobacteria	Gammaproteobacteria	Methylococcales	Methylomonaceae	Methylobacter	B2937_Methylobacter	Not_predicted	Fer
DQ066979.1.1342	-126.118	0.379395	-3.83112	0.000127913	0.000666924	-4.49567	Proteobacteria	Alphaproteobacteria	Sphingomonadales	Sphingomonadaceae	#N/A	B1545_f_Sphingomonadaceae	Not_predicted	Fer
DQ137964.1.1222	-36.2495	0.369279	-2.44764	0.0143874	0.0448283	-4.42667	Proteobacteria	Deltaproteobacteria	Syntrophobacterales	Syntrophobacteraceae	Desulfovirga	B1917_Desulfovirga	Not_predicted	Fer
DQ501327.1.1474	-22.6128	0.447879	-4.333	1.47744e-05	9.36641e-05	-1.3522	Proteobacteria	Deltaproteobacteria	Bdellovibrionales	Bdellovibrionaceae	OM27 clade	B5504_OM27 clade	Not_predicted	Fer
DQ521521.1.1472	-31.1905	0.44635	-5.01033	5.47574e-07	4.54184e-06	-1.10009	Proteobacteria	Gammaproteobacteria	Xanthomonadales	Xanthomonadaceae	Arenimonas	B3850_Arenimonas	Not_predicted	Fer
e0fa815a00e69316508df53b634b9bfb	-65.6278	0.15073	-2.45881	0.0139474	0.0435925	-4.53983	Proteobacteria	Gammaproteobacteria	Legionellales	Legionellaceae	Legionella	B7426_Legionella	Not_predicted	Fer
e175d509abb69530c388032798230fb4	-80.8118	0.437913	-14.6745	1.59182e-48	7.53304e-46	32.3798	Proteobacteria	Deltaproteobacteria	Syntrophobacterales	Syntrophobacteraceae	#N/A	B1149_f_Syntrophobacteraceae	Not_predicted	Fer
e292864a3ca606a28eeb0785aff2d499	-67.4305	0.177564	-3.39633	0.000684175	0.00308704	-4.39004	Proteobacteria	Gammaproteobacteria	Diplorickettsiales	Diplorickettsiaceae	Aquicella	B2481_Aquicella	Not_predicted	Fer
e3c8e345b984401e24577a756f3b8692	-82.8932	0.199442	-7.86849	3.75404e-15	1.00336e-13	-0.76188	Proteobacteria	Gammaproteobacteria	Betaproteobacteriales	Nitrosomonadaceae	#N/A	B2044_f_Nitrosomonadaceae	Not_predicted	Fer
e6b58dd160c1d507ec36054bc81af7f9	-52.9341	0.12736	-5.02468	5.08223e-07	4.23694e-06	-3.07185	Proteobacteria	Gammaproteobacteria	Diplorickettsiales	Diplorickettsiaceae	Aquicella	B14725_Aquicella	Not_predicted	Fer
e8e7b7cd9be4391387ddfecf6d513a1b	-56.8994	0.203885	-7.29026	3.198e-13	6.52993e-12	0.81618	Proteobacteria	Deltaproteobacteria	Syntrophobacterales	Syntrophobacteraceae	Syntrophobacter	B5826_Syntrophobacter	Not_predicted	Fer
ea57712858c0781f5489d79f29a33395	-55.2093	0.144707	-4.97725	6.49797e-07	5.3343e-06	-3.23086	Proteobacteria	Deltaproteobacteria	Desulfuromonadales	Geobacteraceae	Geobacter	B12555_Geobacter	Not_predicted	Fer
ec40c02a4ce731c2f652e7f2d3b5b58b	-32.4114	0.0779821	-3.07659	0.00209639	0.00853946	-4.06613	Proteobacteria	Alphaproteobacteria	Rhodospirillales	uncultured	#N/A	B17299_f_uncultured	Not_predicted	Fer
EF018337.1.1401	-74.8377	0.466997	-10.06	9.3454e-24	5.65726e-22	6.6265	Proteobacteria	Deltaproteobacteria	Myxococcales	mle1-27	uncultured proteobacterium	B1601_uncultured proteobacterium	Not_predicted	Fer
EF018454.1.1401	-29.4254	0.648149	-9.64272	5.83214e-22	3.04673e-20	24.2923	Proteobacteria	Deltaproteobacteria	Myxococcales	Polyangiaceae	Pajaroellobacter	B1728_Pajaroellobacter	Not_predicted	Fer
EF018568.1.1385	-11.178	0.98811	-3.024	0.00249741	0.00998097	-2.51649	Proteobacteria	Gammaproteobacteria	Betaproteobacteriales	Nitrosomonadaceae	Ellin6067	B627_Ellin6067	Not_predicted	Fer
EF019400.1.1336	-63.8188	0.386224	-2.62691	0.00862236	0.0290117	-4.51743	Proteobacteria	Alphaproteobacteria	Sphingomonadales	Sphingomonadaceae	uncultured	B519_uncultured	Not_predicted	Fer
EF019722.1.1392	-87.1945	0.200263	-3.26683	0.00108926	0.00468863	-4.48901	Proteobacteria	Gammaproteobacteria	Gammaproteobacteria Incertae Sedis	Unknown Family	Acidibacter	B2242_Acidibacter	Not_predicted	Fer
EF111207.1.1289	-52.3647	0.187636	-6.70925	2.00374e-11	3.18579e-10	-0.0298221	Proteobacteria	Gammaproteobacteria	Xanthomonadales	Xanthomonadaceae	Pseudoxanthomonas	B7379_Pseudoxanthomonas	Not_predicted	Fer
EF451637.1.1317	-18.5557	1.29553	-4.91477	8.95273e-07	7.09603e-06	1.41574	Proteobacteria	Alphaproteobacteria	Sphingomonadales	Sphingomonadaceae	Sphingomonas	B1080_Sphingomonas	Not_predicted	Fer
EF516292.1.1404	-57.9318	0.152551	-2.9179	0.00352756	0.0135204	-4.44896	Proteobacteria	Alphaproteobacteria	uncultured	uncultured Rhizobiales bacterium	uncultured Rhizobiales bacterium	B4196_uncultured Rhizobiales bacterium	Not_predicted	Fer
EF516312.1.1477	-133.086	0.426186	-11.2711	2.19335e-29	2.2336e-27	1.88961	Proteobacteria	Deltaproteobacteria	Myxococcales	Polyangiaceae	Pajaroellobacter	B1301_Pajaroellobacter	Not_predicted	Fer
EF516895.1.1456	-64.3182	0.373759	-12.1725	5.60304e-34	9.59073e-32	22.1675	Proteobacteria	Gammaproteobacteria	Betaproteobacteriales	SC-I-84	uncultured organism	B298_uncultured organism	Not_predicted	Fer
EF590018.1.1411	-44.848	1.23396	-15.561	2.6081e-54	2.33135e-51	74.5659	Proteobacteria	Deltaproteobacteria	Sva0485	#N/A	#N/A	B732_o_Sva0485	Not_predicted	Fer
EU133464.1.1318	-9.70776	0.538213	-2.47861	0.013197	0.0416025	-3.38411	Proteobacteria	Alphaproteobacteria	Paracaedibacterales	Paracaedibacteraceae	Candidatus Paracaedibacter	B6775_Candidatus Paracaedibacter	Not_predicted	Fer
EU133518.1.1331	-22.7999	0.344335	-5.74314	9.41599e-09	1.02091e-07	3.36265	Proteobacteria	Alphaproteobacteria	Rhodospirillales	Rhodospirillaceae	uncultured	B4613_uncultured	Not_predicted	Fer
EU134331.1.1360	-47.0251	0.168502	-6.02511	1.71682e-09	2.0462e-08	-0.935971	Proteobacteria	Deltaproteobacteria	Myxococcales	#N/A	#N/A	B9573_o_Myxococcales	Not_predicted	Fer
EU134349.1.1315	-102.481	0.24657	-9.72781	2.54508e-22	1.38346e-20	1.29933	Proteobacteria	Deltaproteobacteria	Myxococcales	Archangiaceae	Anaeromyxobacter	B1086_Anaeromyxobacter	Not_predicted	Fer
EU134448.1.1297	-74.6558	0.195678	-6.7304	1.73351e-11	2.78364e-10	-2.04989	Proteobacteria	Deltaproteobacteria	Myxococcales	BIrii41	#N/A	B6606_f_BIrii41	Not_predicted	Fer
EU150268.1.1200	-33.7876	0.555526	-6.25028	4.1725e-10	5.48492e-09	2.09745	Proteobacteria	Gammaproteobacteria	WD260	uncultured eubacterium WD260	uncultured eubacterium WD260	B2102_uncultured eubacterium WD260	Not_predicted	Fer
EU193073.1.1508	-19.6568	0.637105	-4.137	3.53183e-05	0.000206045	-1.31371	Proteobacteria	Deltaproteobacteria	Myxococcales	mle1-27	uncultured Polyangiaceae bacterium	B2193_uncultured Polyangiaceae bacterium	Not_predicted	Fer
EU202832.1.1390	-68.1384	0.179429	-3.43199	0.000600281	0.00274078	-4.38529	Proteobacteria	Alphaproteobacteria	Caulobacterales	Caulobacteraceae	uncultured	B4537_uncultured	Not_predicted	Fer
EU335156.1.1458	-41.1741	0.193813	-3.8268	0.000130176	0.000677405	-3.77072	Proteobacteria	Alphaproteobacteria	Reyranellales	Reyranellaceae	uncultured	B10395_uncultured	Not_predicted	Fer
EU431675.1.1517	-60.1158	0.157567	-5.41959	6.03635e-08	5.82283e-07	-2.96626	Proteobacteria	Deltaproteobacteria	Myxococcales	mle1-27	Myxococcales bacterium Gsoil 473	B10906_Myxococcales bacterium Gsoil 473	Not_predicted	Fer
EU449637.1.1451	-75.8507	0.188734	-6.79654	1.09903e-11	1.81555e-10	-2.02628	Proteobacteria	Gammaproteobacteria	Xanthomonadales	Xanthomonadaceae	Arenimonas	B1109_Arenimonas	Not_predicted	Fer
EU528221.1.1346	-76.2409	0.175105	-2.85644	0.00428821	0.0160235	-4.51661	Proteobacteria	Gammaproteobacteria	Steroidobacterales	Steroidobacteraceae	uncultured	B8798_uncultured	Not_predicted	Fer
EU528249.1.1374	-6.80487	1.00944	-2.42108	0.0154825	0.0476864	-3.18657	Proteobacteria	Deltaproteobacteria	Myxococcales	Archangiaceae	Anaeromyxobacter	B880_Anaeromyxobacter	Not_predicted	Fer
EU542499.1.1485	-43.3185	0.113541	-3.90527	9.43999e-05	0.000501948	-3.77873	Proteobacteria	Deltaproteobacteria	Desulfobacterales	Desulfobulbaceae	Desulfobulbus	B6924_Desulfobulbus	Not_predicted	Fer
EU669606.1.1492	-20.5539	0.452215	-3.28758	0.00101211	0.00439572	-3.19708	Proteobacteria	Gammaproteobacteria	Betaproteobacteriales	Burkholderiaceae	#N/A	B1658_f_Burkholderiaceae	Not_predicted	Fer
EU706181.1.1234	-67.3981	0.496222	-12.0849	1.61979e-33	2.55515e-31	20.0017	Proteobacteria	Gammaproteobacteria	Betaproteobacteriales	Burkholderiaceae	#N/A	B1476_f_Burkholderiaceae	Not_predicted	Fer
EU801228.1.1454	-77.482	0.436123	-7.29311	3.13127e-13	6.40995e-12	-1.35949	Proteobacteria	Alphaproteobacteria	Rhizobiales	Xanthobacteraceae	Pseudolabrys	B864_Pseudolabrys	Not_predicted	Fer
EU808401.1.1346	-75.5654	0.173554	-2.83113	0.00464256	0.0170493	-4.51819	Proteobacteria	Gammaproteobacteria	Xanthomonadales	Xanthomonadaceae	Stenotrophomonas	B8972_Stenotrophomonas	Not_predicted	Fer
EU835398.1.1333	-65.8125	0.158346	-6.24713	4.25707e-10	5.58697e-09	-2.20375	Proteobacteria	Alphaproteobacteria	Rhodobacterales	Rhodobacteraceae	#N/A	B5048_f_Rhodobacteraceae	Not_predicted	Fer
f003291e428917bbe1b13ef25d63f840	-42.9567	0.143609	-2.62819	0.00858999	0.0289258	-4.42904	Proteobacteria	Deltaproteobacteria	Syntrophobacterales	Syntrophaceae	Desulfobacca	B5785_Desulfobacca	Not_predicted	Fer
f48c672455e58e9d799f02beb2ecdb5d	-55.5962	0.431227	-5.6093	2.0558e-08	2.13681e-07	-2.46712	Proteobacteria	Deltaproteobacteria	Myxococcales	Sandaracinaceae	#N/A	B5682_f_Sandaracinaceae	Not_predicted	Fer
f4d71ba4bfbc9347c8f5e4efd1c21027	-31.7937	0.0833333	-2.86628	0.00415719	0.0155919	-4.18354	Proteobacteria	Deltaproteobacteria	Myxococcales	Blfdi19	uncultured soil bacterium	B19533_uncultured soil bacterium	Not_predicted	Fer
f87dd442ed20de8ec5fe5b9e0c2ad048	-36.2227	0.348498	-8.87303	7.64924e-19	3.20511e-17	14.3501	Proteobacteria	Deltaproteobacteria	Bdellovibrionales	Bdellovibrionaceae	Bdellovibrio	B6042_Bdellovibrio	Not_predicted	Fer
f8d5d3db75c7b054500b0b60f7f01044	-114.269	0.364433	-4.95787	7.18018e-07	5.82304e-06	-4.2506	Proteobacteria	Gammaproteobacteria	Xanthomonadales	Xanthomonadaceae	uncultured	B1773_uncultured	Not_predicted	Fer
fb57786c5c6fb090d82851583d83a2aa	-28.4232	0.664429	-9.57473	1.12549e-21	5.69471e-20	24.4453	Proteobacteria	Deltaproteobacteria	Myxococcales	BIrii41	uncultured Polyangiaceae bacterium	B2111_uncultured Polyangiaceae bacterium	Not_predicted	Fer
fd3c40815aa94de0bfdadc4051186198	-50.1578	0.13208	-2.52634	0.0115328	0.0370978	-4.49053	Proteobacteria	Deltaproteobacteria	Oligoflexales	0319-6G20	marine metagenome	B14173_marine metagenome	Not_predicted	Fer
FJ037637.1.1500	-83.8962	0.201855	-7.9637	1.75006e-15	4.82164e-14	-0.666914	Proteobacteria	Gammaproteobacteria	Betaproteobacteriales	Gallionellaceae	#N/A	B489_f_Gallionellaceae	Not_predicted	Fer
FJ190063.1.1408	-55.3015	0.43422	-5.84871	5.02417e-09	5.61381e-08	-2.08114	Proteobacteria	Deltaproteobacteria	Myxococcales	Archangiaceae	Anaeromyxobacter	B162_Anaeromyxobacter	Not_predicted	Fer
FJ444699.1.1510	-69.7835	0.1679	-6.62408	3.57492e-11	5.43672e-10	-1.89809	Proteobacteria	Deltaproteobacteria	Myxococcales	#N/A	#N/A	B4032_o_Myxococcales	Not_predicted	Fer
FJ478906.1.1450	-86.2249	0.198036	-3.2305	0.00123754	0.00529295	-4.49161	Proteobacteria	Alphaproteobacteria	Rhizobiales	Xanthobacteraceae	#N/A	B6387_f_Xanthobacteraceae	Not_predicted	Fer
FJ479263.1.1494	-11.3267	0.499212	-3.95904	7.54894e-05	0.000413138	0.047813	Proteobacteria	Gammaproteobacteria	Steroidobacterales	Steroidobacteraceae	#N/A	B3148_f_Steroidobacteraceae	Not_predicted	Fer
FJ542890.1.1446	-127.155	0.368554	-7.76687	8.39497e-15	2.14405e-13	-2.92498	Proteobacteria	Alphaproteobacteria	Sphingomonadales	Sphingomonadaceae	Novosphingobium	B1022_Novosphingobium	Not_predicted	Fer
FJ562181.1.1201	-17.8337	1.35268	-5.37637	7.67748e-08	7.3095e-07	3.51965	Proteobacteria	Alphaproteobacteria	Caulobacterales	Caulobacteraceae	Brevundimonas	B1170_Brevundimonas	Not_predicted	Fer
FJ654263.1.1425	-59.8016	0.35751	-11.5694	7.23447e-31	8.68677e-29	20.2371	Proteobacteria	Alphaproteobacteria	Acetobacterales	Acetobacteraceae	Roseomonas	B1575_Roseomonas	Not_predicted	Fer
FJ748798.1.1532	-78.9672	0.206978	-7.11909	1.11981e-12	2.13987e-11	-1.74016	Proteobacteria	Deltaproteobacteria	Sva0485	uncultured Spirochaetales bacterium	uncultured Spirochaetales bacterium	B5578_uncultured Spirochaetales bacterium	Not_predicted	Fer
FJ802228.1.1220	-58.2021	0.152551	-5.24707	1.55972e-07	1.42267e-06	-3.07214	Proteobacteria	Deltaproteobacteria	Desulfuromonadales	Geobacteraceae	Geothermobacter	B6141_Geothermobacter	Not_predicted	Fer
FJ936965.1.1497	-33.7142	1.91974	-7.30942	2.77445e-13	5.70856e-12	6.59134	Proteobacteria	Gammaproteobacteria	Xanthomonadales	Xanthomonadaceae	Arenimonas	B471_Arenimonas	Not_predicted	Fer
FJ936969.1.1515	-23.0065	0.774218	-3.60275	0.000315565	0.00152202	-2.9318	Proteobacteria	Deltaproteobacteria	Myxococcales	#N/A	#N/A	B509_o_Myxococcales	Not_predicted	Fer
FJ979841.1.1312	-44.2197	0.147831	-2.70546	0.00682616	0.0239496	-4.4174	Proteobacteria	Alphaproteobacteria	Caulobacterales	Caulobacteraceae	Brevundimonas	B12168_Brevundimonas	Not_predicted	Fer
FM874050.1.1444	-83.2419	0.191185	-3.11874	0.00181859	0.00747221	-4.4994	Proteobacteria	Alphaproteobacteria	Rhizobiales	Rhizobiales Incertae Sedis	uncultured	B7030_uncultured	Not_predicted	Fer
FN667146.1.1464	-56.3461	0.188371	-3.44738	0.000567104	0.00260408	-4.28842	Proteobacteria	Gammaproteobacteria	Betaproteobacteriales	Burkholderiaceae	#N/A	B2036_f_Burkholderiaceae	Not_predicted	Fer
FPLL01003198.19.1485	-39.9745	0.449451	-8.79227	1.57106e-18	6.31959e-17	11.9825	Proteobacteria	Alphaproteobacteria	Azospirillales	Inquilinaceae	Inquilinus	B3550_Inquilinus	Not_predicted	Fer
FPLL01003942.1.1456	-62.381	0.427408	-8.39372	4.99052e-17	1.64544e-15	3.19029	Proteobacteria	Deltaproteobacteria	Myxococcales	Polyangiaceae	Pajaroellobacter	B2345_Pajaroellobacter	Not_predicted	Fer
FPLL01006443.14.1531	-14.0626	0.981965	-2.95615	0.00311832	0.0121899	-3.05272	Proteobacteria	Gammaproteobacteria	R7C24	metagenome	metagenome	B1572_metagenome	Not_predicted	Fer
FPLL01006926.16.1529	-74.8857	0.19628	-6.75113	1.50345e-11	2.44349e-10	-2.03381	Proteobacteria	Gammaproteobacteria	Betaproteobacteriales	TRA3-20	uncultured Burkholderiaceae bacterium	B3678_uncultured Burkholderiaceae bacterium	Not_predicted	Fer
FPLM01004955.1.1469	-36.6627	0.0960953	-3.30523	0.000950485	0.00417166	-4.02767	Proteobacteria	Alphaproteobacteria	Tistrellales	Geminicoccaceae	Candidatus Alysiosphaera	B10581_Candidatus Alysiosphaera	Not_predicted	Fer
FPLP01005193.1.1450	-71.5778	0.485674	-9.68842	3.73947e-22	2.0056e-20	5.91533	Proteobacteria	Gammaproteobacteria	CCD24	#N/A	#N/A	B2257_o_CCD24	Not_predicted	Fer
FPLP01005359.16.1480	-85.0902	0.211724	-7.62443	2.55019e-14	6.05201e-13	-1.34672	Proteobacteria	Alphaproteobacteria	Rhizobiales	Hyphomicrobiaceae	#N/A	B5174_f_Hyphomicrobiaceae	Not_predicted	Fer
FPLP01006193.1.1492	-27.7911	0.0995823	-3.56074	0.000370587	0.00176412	-3.393	Proteobacteria	Deltaproteobacteria	Myxococcales	mle1-27	metagenome	B18038_metagenome	Not_predicted	Fer
FPLS01000843.11.1520	-37.2672	0.133538	-4.77488	1.80973e-06	1.36707e-05	-2.34036	Proteobacteria	Gammaproteobacteria	Xanthomonadales	Rhodanobacteraceae	Dokdonella	B13990_Dokdonella	Not_predicted	Fer
FPLS01001579.8.1507	-15.5746	1.79586	-6.99579	2.71329e-12	4.93856e-11	13.3671	Proteobacteria	Gammaproteobacteria	Pseudomonadales	Moraxellaceae	uncultured	B2015_uncultured	Not_predicted	Fer
FPLS01003533.1.1257	-32.7947	0.206517	-2.55157	0.0107305	0.0350751	-4.35389	Proteobacteria	Deltaproteobacteria	Myxococcales	#N/A	#N/A	B5625_o_Myxococcales	Not_predicted	Fer
FPLS01007492.16.1488	-24.8439	0.290426	-3.94347	8.0559e-05	0.000437903	-2.53054	Proteobacteria	Alphaproteobacteria	#N/A	#N/A	#N/A	B6964_o_NA	Not_predicted	Fer
FPLS01009675.18.1376	-48.8558	0.773993	-9.4263	4.65463e-21	2.26948e-19	11.7554	Proteobacteria	Gammaproteobacteria	Betaproteobacteriales	Methylophilaceae	#N/A	B2076_f_Methylophilaceae	Not_predicted	Fer
FPLS01011563.147.1667	-50.1348	0.476125	-11.4047	4.81192e-30	5.53027e-28	24.5595	Proteobacteria	Gammaproteobacteria	Diplorickettsiales	Diplorickettsiaceae	uncultured	B3980_uncultured	Not_predicted	Fer
FPLS01011637.10.1518	-56.7948	0.141318	-5.08905	3.6282e-07	3.1019e-06	-3.18143	Proteobacteria	Gammaproteobacteria	Pseudomonadales	Moraxellaceae	uncultured	B12975_uncultured	Not_predicted	Fer
FPLS01014419.18.1540	-48.591	0.12736	-4.3806	1.18901e-05	7.65246e-05	-3.55212	Proteobacteria	Deltaproteobacteria	Myxococcales	BIrii41	#N/A	B14753_f_BIrii41	Not_predicted	Fer
FPLS01019439.1.1235	-15.9642	1.13646	-6.51296	7.52769e-11	1.09711e-09	10.175	Proteobacteria	Gammaproteobacteria	CCD24	#N/A	#N/A	B786_o_CCD24	Not_predicted	Fer
FPLS01020808.17.1525	-29.8157	0.152551	-2.44829	0.0143613	0.0447644	-4.3545	Proteobacteria	Gammaproteobacteria	Salinisphaerales	Solimonadaceae	Solimonas	B17029_Solimonas	Not_predicted	Fer
FPLS01033257.10.1473	-72.473	0.180329	-6.49388	8.54392e-11	1.23182e-09	-2.25524	Proteobacteria	Alphaproteobacteria	Micropepsales	Micropepsaceae	uncultured	B8196_uncultured	Not_predicted	Fer
FPLS01039589.11.1546	-42.3222	0.151651	-5.42255	5.93736e-08	5.75495e-07	-1.65342	Proteobacteria	Deltaproteobacteria	Myxococcales	Sandaracinaceae	uncultured	B11653_uncultured	Not_predicted	Fer
FPLS01042900.11.1475	-49.8172	0.178507	-6.38285	1.77288e-10	2.45487e-09	-0.474287	Proteobacteria	Alphaproteobacteria	Micropepsales	Micropepsaceae	uncultured	B3372_uncultured	Not_predicted	Fer
FPLS01052335.12.1320	-64.3659	0.147831	-2.41153	0.0158938	0.0488021	-4.54235	Proteobacteria	Gammaproteobacteria	Diplorickettsiales	Diplorickettsiaceae	uncultured	B12172_uncultured	Not_predicted	Fer
FQ659384.1.1376	-35.0319	0.637853	-6.85225	7.4618e-12	1.26842e-10	4.08044	Proteobacteria	Deltaproteobacteria	Myxococcales	BIrii41	uncultured soil bacterium	B900_uncultured soil bacterium	Not_predicted	Fer
FR774629.1.1348	-86.4233	0.215041	-7.74388	1.00573e-14	2.52847e-13	-1.24223	Proteobacteria	Alphaproteobacteria	Rhizobiales	Rhizobiaceae	Allorhizobium-Neorhizobium-Pararhizobium-Rhizobium	B4916_Allorhizobium-Neorhizobium-Pararhizobium-Rhizobium	Not_predicted	Fer
GQ029515.1.1303	-84.5244	0.19413	-3.16679	0.00154341	0.00643352	-4.49608	Proteobacteria	Alphaproteobacteria	Rhizobiales	Devosiaceae	Devosia	B6751_Devosia	Not_predicted	Fer
GQ097912.1.1359	-78.4703	0.307503	-6.69411	2.22207e-11	3.50521e-10	-2.31342	Proteobacteria	Gammaproteobacteria	Betaproteobacteriales	Rhodocyclaceae	Dechloromonas	B7312_Dechloromonas	Not_predicted	Fer
GQ115602.1.1307	-77.9746	0.204376	-7.0296	2.13171e-12	3.90651e-11	-1.81301	Proteobacteria	Alphaproteobacteria	Rhizobiales	Rhizobiaceae	Allorhizobium-Neorhizobium-Pararhizobium-Rhizobium	B4664_Allorhizobium-Neorhizobium-Pararhizobium-Rhizobium	Not_predicted	Fer
GQ263297.1.1408	-77.1027	0.177084	-2.88873	0.00387178	0.0147483	-4.51458	Proteobacteria	Alphaproteobacteria	Sphingomonadales	Sphingomonadaceae	Sphingobium	B8599_Sphingobium	Not_predicted	Fer
GQ263939.1.1422	-53.687	0.288044	-4.84097	1.30086e-06	1.01017e-05	-3.30741	Proteobacteria	Alphaproteobacteria	Dongiales	Dongiaceae	Dongia	B2849_Dongia	Not_predicted	Fer
GQ354997.1.1513	-64.3227	0.274772	-4.06081	4.9071e-05	0.000279191	-4.13176	Proteobacteria	Deltaproteobacteria	Deltaproteobacteria Incertae Sedis	Syntrophorhabdaceae	Syntrophorhabdus	B1605_Syntrophorhabdus	Not_predicted	Fer
GQ397025.1.1454	-42.8907	0.394335	-6.57278	5.04889e-11	7.56393e-10	1.14498	Proteobacteria	Alphaproteobacteria	Rhizobiales	Xanthobacteraceae	Pseudolabrys	B555_Pseudolabrys	Not_predicted	Fer
GQ402572.1.1415	-80.2057	0.307726	-8.39046	5.13038e-17	1.6778e-15	0.569239	Proteobacteria	Alphaproteobacteria	#N/A	#N/A	#N/A	B3797_o_NA	Not_predicted	Fer
GQ402743.1.1486	-65.8072	0.172485	-5.93268	3.02485e-09	3.49836e-08	-2.63111	Proteobacteria	Deltaproteobacteria	Deltaproteobacteria Incertae Sedis	Syntrophorhabdaceae	Syntrophorhabdus	B4460_Syntrophorhabdus	Not_predicted	Fer
GQ472429.1.1394	-54.1598	0.535744	-8.16213	3.46676e-16	1.05644e-14	4.12819	Proteobacteria	Alphaproteobacteria	Acetobacterales	Acetobacteraceae	#N/A	B2051_f_Acetobacteraceae	Not_predicted	Fer
GU120555.1.1471	-72.293	0.179881	-6.47775	9.50652e-11	1.35844e-09	-2.26714	Proteobacteria	Deltaproteobacteria	Desulfobacterales	Desulfobulbaceae	#N/A	B4998_f_Desulfobulbaceae	Not_predicted	Fer
GU179689.1.1340	-57.5041	0.206051	-7.36774	1.79662e-13	3.80363e-12	0.934298	Proteobacteria	Alphaproteobacteria	Sphingomonadales	Sphingomonadaceae	Novosphingobium	B3644_Novosphingobium	Not_predicted	Fer
GU208386.1.1435	-89.4061	0.205342	-3.34969	0.000810375	0.0036119	-4.48299	Proteobacteria	Gammaproteobacteria	Betaproteobacteriales	Burkholderiaceae	uncultured	B5707_uncultured	Not_predicted	Fer
GU208435.1.1464	-65.0845	0.171387	-3.27817	0.00104646	0.00453352	-4.40542	Proteobacteria	Deltaproteobacteria	Sva0485	#N/A	#N/A	B3266_o_Sva0485	Not_predicted	Fer
HE583116.1.1329	-92.7082	0.212926	-3.4734	0.000514888	0.00239161	-4.47372	Proteobacteria	Alphaproteobacteria	Rhizobiales	Rhizobiaceae	Allorhizobium-Neorhizobium-Pararhizobium-Rhizobium	B3744_Allorhizobium-Neorhizobium-Pararhizobium-Rhizobium	Not_predicted	Fer
HE587097.1.1398	-55.2021	0.470944	-6.8049	1.03713e-11	1.72561e-10	-0.175511	Proteobacteria	Gammaproteobacteria	Betaproteobacteriales	Gallionellaceae	Sideroxydans	B582_Sideroxydans	Not_predicted	Fer
HE818624.1.1470	-31.1448	0.603872	-7.00086	2.61705e-12	4.78504e-11	6.06382	Proteobacteria	Gammaproteobacteria	Betaproteobacteriales	Burkholderiaceae	#N/A	B678_f_Burkholderiaceae	Not_predicted	Fer
HG380587.1.1401	-36.8909	1.3394	-10.2256	1.72793e-24	1.16817e-22	23.8334	Proteobacteria	Gammaproteobacteria	Betaproteobacteriales	Hydrogenophilaceae	Thiobacillus	B444_Thiobacillus	Not_predicted	Fer
HG529036.1.1241	-54.5245	0.398135	-5.21967	1.80866e-07	1.63125e-06	-2.9215	Proteobacteria	Alphaproteobacteria	Rhizobiales	Hyphomicrobiaceae	Hyphomicrobium	B3156_Hyphomicrobium	Not_predicted	Fer
HG529082.1.1300	-48.4878	0.278783	-3.89569	9.82102e-05	0.000521175	-3.93391	Proteobacteria	Gammaproteobacteria	Methylococcales	Methylococcaceae	Methylocaldum	B8021_Methylocaldum	Not_predicted	Fer
HM128613.1.1456	-53.327	0.487332	-9.23735	2.74922e-20	1.27112e-18	9.04763	Proteobacteria	Gammaproteobacteria	Coxiellales	Coxiellaceae	Coxiella	B2410_Coxiella	Not_predicted	Fer
HM141527.1.1378	-82.5255	0.205342	-7.39462	1.46878e-13	3.14265e-12	-1.54318	Proteobacteria	Alphaproteobacteria	Rhizobiales	Devosiaceae	Devosia	B4185_Devosia	Not_predicted	Fer
HM243860.1.1529	-40.333	0.175609	-4.63603	3.57208e-06	2.54088e-05	-2.81572	Proteobacteria	Deltaproteobacteria	Sva0485	#N/A	#N/A	B10315_o_Sva0485	Not_predicted	Fer
HM243869.1.1521	-34.6355	0.0833333	-3.28771	0.00101163	0.00439572	-3.98148	Proteobacteria	Deltaproteobacteria	#N/A	#N/A	#N/A	B18784_o_NA	Not_predicted	Fer
HM243874.1.1530	-43.2023	0.312541	-7.39186	1.4996e-13	3.20006e-12	3.92738	Proteobacteria	Gammaproteobacteria	Coxiellales	Coxiellaceae	Coxiella	B3736_Coxiella	Not_predicted	Fer
HM243927.1.1515	-37.0166	1.75249	-10.171	3.023e-24	1.97724e-22	23.307	Proteobacteria	Deltaproteobacteria	Desulfuromonadales	Geobacteraceae	Geobacter	B96_Geobacter	Not_predicted	Fer
HM269183.1.1357	-38.7894	0.609271	-3.95036	7.82768e-05	0.000426651	-3.56135	Proteobacteria	Gammaproteobacteria	Diplorickettsiales	Diplorickettsiaceae	Aquicella	B2066_Aquicella	Not_predicted	Fer
HM273154.1.1280	-22.9288	1.06559	-5.75452	8.80389e-09	9.61021e-08	3.36718	Proteobacteria	Alphaproteobacteria	Caulobacterales	Caulobacteraceae	Asticcacaulis	B2387_Asticcacaulis	Not_predicted	Fer
HM273849.1.1308	-42.4971	0.203637	-4.00256	6.2866e-05	0.000351954	-3.66588	Proteobacteria	Alphaproteobacteria	Rhizobiales	A0839	metagenome	B12841_metagenome	Not_predicted	Fer
HM438343.1.1441	-46.2364	0.338538	-6.46129	1.05989e-10	1.50651e-09	0.238422	Proteobacteria	Alphaproteobacteria	Sphingomonadales	Sphingomonadaceae	Altererythrobacter	B4500_Altererythrobacter	Not_predicted	Fer
HM438361.1.1442	-47.9403	0.125654	-4.32193	1.55346e-05	9.79434e-05	-3.5815	Proteobacteria	Alphaproteobacteria	Sphingomonadales	Sphingomonadaceae	Altererythrobacter	B14977_Altererythrobacter	Not_predicted	Fer
HQ003551.1.1527	-12.7202	3.17018	-5.58662	2.34271e-08	2.41629e-07	6.48725	Proteobacteria	Deltaproteobacteria	Syntrophobacterales	Syntrophaceae	Syntrophus	B188_Syntrophus	Not_predicted	Fer
HQ114181.1.1456	-35.2499	0.391064	-4.44387	8.87841e-06	5.85466e-05	-2.70659	Proteobacteria	Gammaproteobacteria	Cellvibrionales	Halieaceae	OM60(NOR5) clade	B6309_OM60(NOR5) clade	Not_predicted	Fer
HQ119011.1.1467	-64.7967	0.148821	-2.42767	0.0152039	0.0469541	-4.5415	Proteobacteria	Alphaproteobacteria	Dongiales	Dongiaceae	Dongia	B8646_Dongia	Not_predicted	Fer
HQ120490.1.1324	-47.5964	0.347149	-8.41777	4.06817e-17	1.36939e-15	7.019	Proteobacteria	Alphaproteobacteria	Sphingomonadales	Sphingomonadaceae	Sphingomonas	B5975_Sphingomonas	Not_predicted	Fer
HQ132471.1.1573	-15.4007	0.833377	-5.52606	3.31216e-08	3.36444e-07	5.1246	Proteobacteria	Deltaproteobacteria	Desulfarculales	Desulfarculaceae	uncultured	B4906_uncultured	Not_predicted	Fer
HQ166634.1.1476	-12.0643	2.2257	-3.38502	0.000712966	0.00320436	-1.809	Proteobacteria	Gammaproteobacteria	Betaproteobacteriales	Nitrosomonadaceae	Ellin6067	B195_Ellin6067	Not_predicted	Fer
HQ246246.1.1329	-41.3948	0.300914	-4.24838	2.16203e-05	0.000132472	-3.37147	Proteobacteria	Alphaproteobacteria	Acetobacterales	Acetobacteraceae	Roseomonas	B6494_Roseomonas	Not_predicted	Fer
HQ330600.1.1417	-17.1622	2.30002	-7.52137	5.62804e-14	1.26474e-12	16.0436	Proteobacteria	Deltaproteobacteria	Syntrophobacterales	Syntrophaceae	Syntrophus	B440_Syntrophus	Not_predicted	Fer
HQ330610.1.1391	-54.3735	0.578627	-10.6415	2.21496e-26	1.74699e-24	16.6803	Proteobacteria	Deltaproteobacteria	Sva0485	#N/A	#N/A	B1198_o_Sva0485	Not_predicted	Fer
HQ397524.1.1516	-64.271	0.375845	-7.64351	2.20013e-14	5.29942e-13	0.693456	Proteobacteria	Deltaproteobacteria	Myxococcales	Archangiaceae	#N/A	B1758_f_Archangiaceae	Not_predicted	Fer
HQ697478.1.1246	-63.7704	0.153432	-6.05329	1.4421e-09	1.73418e-08	-2.35396	Proteobacteria	Gammaproteobacteria	Legionellales	Legionellaceae	Legionella	B7752_Legionella	Not_predicted	Fer
HQ721122.1.1381	-84.7598	0.210902	-7.59483	3.20467e-14	7.49465e-13	-1.37237	Proteobacteria	Deltaproteobacteria	RCP2-54	uncultured prokaryote	uncultured prokaryote	B784_uncultured prokaryote	Not_predicted	Fer
HQ817733.1.1458	-58.7519	0.282324	-4.68173	2.86163e-06	2.07966e-05	-3.63274	Proteobacteria	Gammaproteobacteria	Legionellales	Legionellaceae	Legionella	B5684_Legionella	Not_predicted	Fer
HQ827990.1.1460	-62.2551	0.149787	-5.90946	3.48279e-09	3.97998e-08	-2.46236	Proteobacteria	Gammaproteobacteria	Diplorickettsiales	Diplorickettsiaceae	uncultured	B8988_uncultured	Not_predicted	Fer
HQ900326.1.1225	-72.5169	0.865025	-15.3969	3.25214e-53	2.3785e-50	44.8032	Proteobacteria	Gammaproteobacteria	Betaproteobacteriales	Burkholderiaceae	Massilia	B124_Massilia	Not_predicted	Fer
JF119689.1.1303	-27.5609	2.08624	-11.3467	9.32084e-30	1.04147e-27	41.7799	Proteobacteria	Alphaproteobacteria	Rhizobiales	Hyphomicrobiaceae	Hyphomicrobium	B381_Hyphomicrobium	Not_predicted	Fer
JF142601.1.1308	-83.4567	0.207659	-7.47807	7.82444e-14	1.72459e-12	-1.47254	Proteobacteria	Alphaproteobacteria	Sphingomonadales	Sphingomonadaceae	Sphingobium	B5521_Sphingobium	Not_predicted	Fer
JF174994.1.1355	-63.3252	0.157567	-5.6742	1.41092e-08	1.4955e-07	-2.82295	Proteobacteria	Gammaproteobacteria	Cellvibrionales	Cellvibrionaceae	Cellvibrio	B3403_Cellvibrio	Not_predicted	Fer
JF175246.1.1371	-52.8597	0.779276	-10.0361	1.18866e-23	7.13639e-22	13.5993	Proteobacteria	Deltaproteobacteria	Myxococcales	Haliangiaceae	Haliangium	B1948_Haliangium	Not_predicted	Fer
JF176560.1.1364	-71.3618	0.177564	-6.39431	1.6451e-10	2.28186e-09	-2.32828	Proteobacteria	Gammaproteobacteria	Diplorickettsiales	Diplorickettsiaceae	uncultured	B8544_uncultured	Not_predicted	Fer
JF189043.1.1282	-60.1685	0.215599	-7.70911	1.32045e-14	3.2787e-13	1.46962	Proteobacteria	Alphaproteobacteria	Caulobacterales	Caulobacteraceae	Brevundimonas	B3586_Brevundimonas	Not_predicted	Fer
JF417797.1.1443	-84.6633	0.221908	-7.63261	2.39391e-14	5.74897e-13	-1.3043	Proteobacteria	Alphaproteobacteria	Rhizobiales	Devosiaceae	#N/A	B4414_f_Devosiaceae	Not_predicted	Fer
JF703387.1.1439	-35.3848	0.641046	-5.85941	4.71133e-09	5.29367e-08	0.457714	Proteobacteria	Gammaproteobacteria	Gammaproteobacteria Incertae Sedis	Unknown Family	Candidatus Ovatusbacter	B3727_Candidatus Ovatusbacter	Not_predicted	Fer
JF917210.1.1442	-46.1529	0.154294	-2.82374	0.00475096	0.0173971	-4.39892	Proteobacteria	Gammaproteobacteria	Legionellales	Legionellaceae	Legionella	B11331_Legionella	Not_predicted	Fer
JF922421.1.1521	-75.9715	0.717474	-8.01791	1.12877e-15	3.17516e-14	0.184822	Proteobacteria	Deltaproteobacteria	MBNT15	#N/A	#N/A	B603_o_MBNT15	Not_predicted	Fer
JN023295.1.1510	-88.9302	0.3687	-3.77181	0.000162494	0.000831066	-4.4103	Proteobacteria	Deltaproteobacteria	Myxococcales	Haliangiaceae	Haliangium	B1986_Haliangium	Not_predicted	Fer
JN023825.1.1443	-60.4127	0.158346	-5.44635	5.19629e-08	5.09186e-07	-2.94952	Proteobacteria	Alphaproteobacteria	Rhizobiales	Xanthobacteraceae	Rhodoplanes	B2621_Rhodoplanes	Not_predicted	Fer
JN038851.1.1484	-43.6153	0.108525	-3.90811	9.32994e-05	0.000499065	-3.7862	Proteobacteria	Deltaproteobacteria	Myxococcales	VHS-B4-70	#N/A	B9815_f_VHS-B4-70	Not_predicted	Fer
JN038860.1.1509	-11.6667	0.395866	-2.8339	0.0046025	0.0170083	-2.97754	Proteobacteria	Deltaproteobacteria	Oligoflexales	0319-6G20	uncultured proteobacterium	B4250_uncultured proteobacterium	Not_predicted	Fer
JN397710.1.1451	-49.0173	0.275066	-4.35121	1.35998e-05	8.65592e-05	-3.5946	Proteobacteria	Gammaproteobacteria	Methylococcales	Methylococcaceae	Candidatus Methylospira	B4139_Candidatus Methylospira	Not_predicted	Fer
JN590703.1.1281	-32.6369	0.761118	-7.5587	4.23009e-14	9.6133e-13	8.2887	Proteobacteria	Alphaproteobacteria	Caulobacterales	Caulobacteraceae	Phenylobacterium	B325_Phenylobacterium	Not_predicted	Fer
JN672477.1.1315	-119.839	0.416536	-10.6037	3.31281e-26	2.56265e-24	1.60433	Proteobacteria	Deltaproteobacteria	MBNT15	uncultured proteobacterium	uncultured proteobacterium	B768_uncultured proteobacterium	Not_predicted	Fer
JN825495.1.1495	-53.0821	0.13208	-4.75637	1.98352e-06	1.48996e-05	-3.36786	Proteobacteria	Gammaproteobacteria	CCM19a	#N/A	#N/A	B5547_o_CCM19a	Not_predicted	Fer
JQ245529.1.1425	-40.8504	0.350891	-5.93942	2.90333e-09	3.37534e-08	-0.282779	Proteobacteria	Deltaproteobacteria	Deltaproteobacteria Incertae Sedis	Syntrophorhabdaceae	Syntrophorhabdus	B1843_Syntrophorhabdus	Not_predicted	Fer
JQ408038.1.1375	-38.9489	0.317163	-8.07359	7.17351e-16	2.09097e-14	8.42105	Proteobacteria	Deltaproteobacteria	Myxococcales	Polyangiaceae	Labilithrix	B6071_Labilithrix	Not_predicted	Fer
JQ426134.1.1515	-41.0319	0.445841	-6.69811	2.16222e-11	3.4175e-10	1.93272	Proteobacteria	Deltaproteobacteria	RCP2-54	uncultured prokaryote	uncultured prokaryote	B2652_uncultured prokaryote	Not_predicted	Fer
JQ625016.1.1319	-48.1491	0.277147	-9.16654	5.30086e-20	2.36919e-18	10.597	Proteobacteria	Alphaproteobacteria	Azospirillales	Inquilinaceae	Inquilinus	B1989_Inquilinus	Not_predicted	Fer
JQ678526.1.1509	-19.3537	0.941495	-6.12024	9.50157e-10	1.17963e-08	6.45253	Proteobacteria	Deltaproteobacteria	Desulfobacterales	Desulfobulbaceae	#N/A	B890_f_Desulfobulbaceae	Not_predicted	Fer
JQ684398.1.1481	-44.1925	0.115831	-3.98406	6.79659e-05	0.000376056	-3.74297	Proteobacteria	Deltaproteobacteria	Bdellovibrionales	Bdellovibrionaceae	OM27 clade	B16196_OM27 clade	Not_predicted	Fer
JQ977482.1.1377	-53.9996	0.193494	-6.91872	4.68229e-12	8.17115e-11	0.267093	Proteobacteria	Alphaproteobacteria	Rhizobiales	Rhizobiaceae	#N/A	B5166_f_Rhizobiaceae	Not_predicted	Fer
JX133392.1.1515	-44.886	0.669802	-7.22879	5.03236e-13	1.00211e-11	2.89397	Proteobacteria	Deltaproteobacteria	Myxococcales	Archangiaceae	Anaeromyxobacter	B465_Anaeromyxobacter	Not_predicted	Fer
JX133462.1.1496	-32.2009	0.379528	-4.77507	1.80796e-06	1.36702e-05	-1.77863	Proteobacteria	Gammaproteobacteria	Steroidobacterales	Steroidobacteraceae	uncultured	B4734_uncultured	Not_predicted	Fer
JX223411.1.1325	-52.7857	0.670413	-8.22514	2.05658e-16	6.41286e-15	4.70509	Proteobacteria	Deltaproteobacteria	Desulfuromonadales	Geobacteraceae	Geobacter	B233_Geobacter	Not_predicted	Fer
JX223425.1.1510	-16.5606	0.446299	-2.7584	0.00581326	0.0207949	-3.60921	Proteobacteria	Deltaproteobacteria	Desulfuromonadales	Geobacteraceae	Geobacter	B1776_Geobacter	Not_predicted	Fer
JX225003.1.1447	-85.4288	0.471283	-6.94425	3.91055e-12	6.91436e-11	-2.34001	Proteobacteria	Deltaproteobacteria	Desulfuromonadales	Geobacteraceae	Geobacter	B1438_Geobacter	Not_predicted	Fer
JX489868.1.1497	-37.4091	0.322618	-7.89046	3.15027e-15	8.50467e-14	8.08065	Proteobacteria	Gammaproteobacteria	Oceanospirillales	Pseudohongiellaceae	BIyi10	B6425_BIyi10	Not_predicted	Fer
JX515469.1.1451	-44.0283	0.376808	-6.3787	1.82148e-10	2.51784e-09	0.374599	Proteobacteria	Alphaproteobacteria	Rhizobiales	Devosiaceae	Devosia	B4829_Devosia	Not_predicted	Fer
JX521039.1.1534	-35.0857	1.22401	-6.40077	1.57715e-10	2.19899e-09	2.30939	Proteobacteria	Deltaproteobacteria	Myxococcales	Polyangiaceae	Aetherobacter	B580_Aetherobacter	Not_predicted	Fer
JX898164.1.1512	-7.30763	0.620606	-2.93759	0.0033112	0.0128255	-2.12223	Proteobacteria	Deltaproteobacteria	Bdellovibrionales	Bdellovibrionaceae	Bdellovibrio	B5228_Bdellovibrio	Not_predicted	Fer
JX949361.1.1344	-77.7638	0.193494	-6.96796	3.30646e-12	5.94406e-11	-1.89198	Proteobacteria	Alphaproteobacteria	Caulobacterales	Caulobacteraceae	Brevundimonas	B3285_Brevundimonas	Not_predicted	Fer
KC166826.1.1405	-99.7543	0.229109	-3.73739	0.000186407	0.000943765	-4.45281	Proteobacteria	Alphaproteobacteria	Caulobacterales	Caulobacteraceae	Phenylobacterium	B3953_Phenylobacterium	Not_predicted	Fer
KC290421.1.1525	-46.172	0.391277	-6.50507	7.93248e-11	1.15401e-09	0.366862	Proteobacteria	Gammaproteobacteria	Methylococcales	Methylomonaceae	Crenothrix	B1040_Crenothrix	Not_predicted	Fer
KC331385.1.1518	-58.5424	0.36137	-5.15163	2.60465e-07	2.27749e-06	-3.19068	Proteobacteria	Deltaproteobacteria	Myxococcales	Polyangiaceae	Sorangium	B4154_Sorangium	Not_predicted	Fer
KC357961.1.1209	-69.1012	0.17194	-6.19176	6.05499e-10	7.80647e-09	-2.47339	Proteobacteria	Alphaproteobacteria	Caulobacterales	Hyphomonadaceae	SWB02	B5888_SWB02	Not_predicted	Fer
KC432060.1.1232	-15.2492	1.32888	-3.78633	0.000153296	0.000787525	-1.37872	Proteobacteria	Deltaproteobacteria	Myxococcales	BIrii41	uncultured soil bacterium	B1391_uncultured soil bacterium	Not_predicted	Fer
KC432113.1.1362	-77.3117	0.177564	-2.89656	0.0037765	0.014399	-4.51408	Proteobacteria	Deltaproteobacteria	Myxococcales	BIrii41	#N/A	B3393_f_BIrii41	Not_predicted	Fer
KC432314.1.1365	-37.0534	0.43577	-7.22626	5.12675e-13	1.01839e-11	5.04491	Proteobacteria	Gammaproteobacteria	Legionellales	Legionellaceae	Legionella	B4846_Legionella	Not_predicted	Fer
KC620879.1.1500	-47.9403	0.125654	-4.32193	1.55346e-05	9.79434e-05	-3.5815	Proteobacteria	Gammaproteobacteria	Diplorickettsiales	Diplorickettsiaceae	Aquicella	B14995_Aquicella	Not_predicted	Fer
KC683157.1.1480	-14.096	0.527832	-3.43752	0.000588149	0.0026961	-2.04867	Proteobacteria	Alphaproteobacteria	Rhizobiales	#N/A	#N/A	B3312_o_Rhizobiales	Not_predicted	Fer
KF063025.1.1355	-86.5448	0.461749	-4.80552	1.55368e-06	1.18702e-05	-4.07638	Proteobacteria	Gammaproteobacteria	Betaproteobacteriales	Burkholderiaceae	#N/A	B1915_f_Burkholderiaceae	Not_predicted	Fer
KF066376.1.1352	-74.7958	0.681141	-11.5459	9.49208e-31	1.123e-28	13.6415	Proteobacteria	Gammaproteobacteria	Betaproteobacteriales	Burkholderiaceae	#N/A	B655_f_Burkholderiaceae	Not_predicted	Fer
KF469206.1.1482	-23.1898	0.594246	-4.7949	1.63818e-06	1.24567e-05	-0.186315	Proteobacteria	Deltaproteobacteria	Syntrophobacterales	Syntrophaceae	uncultured	B2049_uncultured	Not_predicted	Fer
KF475878.1.1503	-26.1729	0.661898	-6.58127	4.76936e-11	7.18529e-10	5.94646	Proteobacteria	Gammaproteobacteria	Pseudomonadales	Pseudomonadaceae	Pseudomonas	B1602_Pseudomonas	Not_predicted	Fer
KF560404.1.1478	-49.2151	0.128996	-4.43687	9.17206e-06	6.01379e-05	-3.52357	Proteobacteria	Alphaproteobacteria	Acetobacterales	Acetobacteraceae	Roseomonas	B4935_Roseomonas	Not_predicted	Fer
KF836030.1.1388	-34.9307	0.219968	-2.71776	0.00657761	0.0231787	-4.31523	Proteobacteria	Alphaproteobacteria	Rhizobiales	Xanthobacteraceae	Bradyrhizobium	B4557_Bradyrhizobium	Not_predicted	Fer
KF927015.1.1212	-78.0676	0.20462	-7.03798	2.00767e-12	3.69603e-11	-1.80622	Proteobacteria	Alphaproteobacteria	Caulobacterales	Caulobacteraceae	Brevundimonas	B5406_Brevundimonas	Not_predicted	Fer
KJ191927.1.1507	-40.35	0.10576	-3.63765	0.000275765	0.00134783	-3.89488	Proteobacteria	Deltaproteobacteria	Myxococcales	Blfdi19	uncultured Cystobacterineae bacterium	B6667_uncultured Cystobacterineae bacterium	Not_predicted	Fer
KJ476581.1.1472	-59.6441	0.620075	-12.796	2.34654e-37	6.29264e-35	29.8498	Proteobacteria	Deltaproteobacteria	Syntrophobacterales	Syntrophaceae	Smithella	B2298_Smithella	Not_predicted	Fer
KJ574407.1.1224	-31.0085	0.111111	-3.97298	7.12061e-05	0.000392365	-3.06998	Proteobacteria	Gammaproteobacteria	Pseudomonadales	Moraxellaceae	Psychrobacter	B16766_Psychrobacter	Not_predicted	Fer
KM221456.1.1503	-36.8605	0.13208	-4.72276	2.34095e-06	1.72621e-05	-2.39184	Proteobacteria	Gammaproteobacteria	Diplorickettsiales	Diplorickettsiaceae	uncultured	B14202_uncultured	Not_predicted	Fer
KP054158.1.1454	-61.2065	0.20462	-3.74475	0.00018103	0.000918636	-4.22799	Proteobacteria	Gammaproteobacteria	Betaproteobacteriales	B1-7BS	uncultured beta proteobacterium	B1098_uncultured beta proteobacterium	Not_predicted	Fer
KP076295.1.1506	-57.8898	0.207433	-7.41715	1.23993e-13	2.66006e-12	1.01029	Proteobacteria	Gammaproteobacteria	Xanthomonadales	Xanthomonadaceae	#N/A	B5549_f_Xanthomonadaceae	Not_predicted	Fer
KP296192.1.1411	-87.5446	0.201067	-3.27995	0.00103987	0.00450742	-4.48807	Proteobacteria	Gammaproteobacteria	Betaproteobacteriales	Rhodocyclaceae	#N/A	B6098_f_Rhodocyclaceae	Not_predicted	Fer
KP745047.1.1479	-87.1588	0.216871	-7.80979	5.98319e-15	1.54774e-13	-1.18388	Proteobacteria	Deltaproteobacteria	Myxococcales	BIrii41	#N/A	B4777_f_BIrii41	Not_predicted	Fer
KR110074.1.1497	-44.6126	0.159858	-5.71601	1.10465e-08	1.19128e-07	-1.31344	Proteobacteria	Gammaproteobacteria	Betaproteobacteriales	SC-I-84	#N/A	B3158_f_SC-I-84	Not_predicted	Fer
KR560035.1.1435	-48.1424	0.115831	-4.56984	4.90752e-06	3.4006e-05	-3.34679	Proteobacteria	Alphaproteobacteria	Elsterales	uncultured	uncultured soil bacterium	B16208_uncultured soil bacterium	Not_predicted	Fer
KT166987.1.1376	-26.807	0.064498	-2.54461	0.0109467	0.0355537	-4.25453	Proteobacteria	Gammaproteobacteria	Betaproteobacteriales	Burkholderiaceae	Lautropia	B21208_Lautropia	Not_predicted	Fer
KU177252.1.1213	-84.5801	0.543791	-9.03006	1.85347e-19	8.01675e-18	1.60981	Proteobacteria	Alphaproteobacteria	Rhizobiales	Rhizobiaceae	Allorhizobium-Neorhizobium-Pararhizobium-Rhizobium	B1501_Allorhizobium-Neorhizobium-Pararhizobium-Rhizobium	Not_predicted	Fer
KU253630.1.1373	-73.6246	0.169096	-2.75842	0.00581294	0.0207949	-4.52266	Proteobacteria	Alphaproteobacteria	Rhizobiales	Rhizobiaceae	Aureimonas	B5699_Aureimonas	Not_predicted	Fer
KX589534.1.1481	-80.9339	0.213123	-4.07647	4.58859e-05	0.000262704	-4.29091	Proteobacteria	Alphaproteobacteria	Caulobacterales	Caulobacteraceae	Phenylobacterium	B912_Phenylobacterium	Not_predicted	Fer
KY190385.1.1419	-17.4463	1.06379	-6.30947	2.85333e-10	3.83223e-09	8.30894	Proteobacteria	Alphaproteobacteria	Acetobacterales	Acetobacteraceae	#N/A	B658_f_Acetobacteraceae	Not_predicted	Fer
KY190668.1.1409	-7.47164	0.646511	-2.84201	0.00448712	0.0166661	-2.3741	Proteobacteria	Alphaproteobacteria	Sphingomonadales	Sphingomonadaceae	Sphingomonas	B1292_Sphingomonas	Not_predicted	Fer
LN563435.1.1366	-28.6863	0.10279	-3.67544	0.000238004	0.0011783	-3.30667	Proteobacteria	Gammaproteobacteria	Cellvibrionales	Halieaceae	OM60(NOR5) clade	B17733_OM60(NOR5) clade	Not_predicted	Fer
LN571254.1.1292	-44.1753	0.244108	-5.96766	2.44362e-09	2.85326e-08	-0.69893	Proteobacteria	Alphaproteobacteria	Caulobacterales	Caulobacteraceae	Asticcacaulis	B3764_Asticcacaulis	Not_predicted	Fer
LN870718.1.1401	-32.7264	0.508356	-6.32818	2.52847e-10	3.41874e-09	2.66532	Proteobacteria	Deltaproteobacteria	Myxococcales	Blfdi19	uncultured Cystobacterineae bacterium	B4407_uncultured Cystobacterineae bacterium	Not_predicted	Fer
LNDT01000039.103304.104660	-22.9902	0.187636	-2.85362	0.00432651	0.0161368	-3.90011	Proteobacteria	Deltaproteobacteria	Bdellovibrionales	Bdellovibrionaceae	Bdellovibrio	B7867_Bdellovibrio	Not_predicted	Fer
LT841298.1.1674	-32.1365	0.202372	-2.50036	0.0124139	0.0395056	-4.36532	Proteobacteria	Deltaproteobacteria	Desulfuromonadales	Geobacteraceae	Geobacter	B727_Geobacter	Not_predicted	Fer
AB486837.1.1387	-14.4859	0.704769	-3.35137	0.000805482	0.00359407	-2.31373	Rokubacteria	NC10	Rokubacteriales	#N/A	#N/A	B1272_o_Rokubacteriales	Not_predicted	Fer
1a053dda6abc1e600c99fb17a66125c9	-35.0141	0.435511	-5.16626	2.409e-07	2.12039e-06	-1.29697	Spirochaetes	Spirochaetia	Spirochaetales	Spirochaetaceae	Spirochaeta 2	B5358_Spirochaeta 2	Not_predicted	Fer
3e57be175078cb3711d352c06fa08ecc	-35.7491	0.278399	-3.22034	0.00128225	0.00546961	-4.06029	Spirochaetes	Spirochaetia	Brevinematales	Brevinemataceae	Brevinema	B8617_Brevinema	Not_predicted	Fer
4442fe626062ab5b0d955f2ceb281aca	-58.2383	0.140122	-5.52817	3.27255e-08	3.32841e-07	-2.73711	Spirochaetes	Spirochaetia	Spirochaetales	Spirochaetaceae	uncultured	B13033_uncultured	Not_predicted	Fer
54f8618d81ebbeb10ec81cd11aa1da36	-60.8596	0.694704	-12.5311	6.68877e-36	1.34528e-33	26.8792	Spirochaetes	Spirochaetia	Spirochaetales	Spirochaetaceae	Spirochaeta 2	B1489_Spirochaeta 2	Not_predicted	Fer
5c40894df9303cb90bad3e3ae57260f9	-52.4742	0.130568	-4.70191	2.59305e-06	1.89992e-05	-3.39718	Spirochaetes	Leptospirae	Leptospirales	Leptospiraceae	RBG-16-49-21	B14255_RBG-16-49-21	Not_predicted	Fer
5cfa125f3a9db31af154a980768743ab	-18.1445	0.282498	-3.33666	0.000849329	0.00376673	-2.85691	Spirochaetes	Spirochaetia	Spirochaetales	Spirochaetaceae	Spirochaeta 2	B3846_Spirochaeta 2	Not_predicted	Fer
7509a4a767b979835ae7f9383ab4d985	-36.1577	0.378962	-8.02789	1.04092e-15	2.94866e-14	9.32276	Spirochaetes	Spirochaetia	Spirochaetales	Spirochaetaceae	Spirochaeta 2	B5674_Spirochaeta 2	Not_predicted	Fer
9f6cf4bea91edd5dfd087b15c626bbe1	-26.818	0.0960953	-3.43606	0.00059133	0.00270298	-3.48374	Spirochaetes	V2072-189E03	uncultured Spirochaetales bacterium	uncultured Spirochaetales bacterium	uncultured Spirochaetales bacterium	B14480_uncultured Spirochaetales bacterium	Not_predicted	Fer
9fa2166e6743250b0e9f8c18ac8ecb0c	-45.0812	0.508703	-8.64449	5.76716e-18	2.15799e-16	9.01308	Spirochaetes	Spirochaetia	Spirochaetales	Spirochaetaceae	Spirochaeta 2	B5798_Spirochaeta 2	Not_predicted	Fer
a86bbb8f3313d6065bc9bf4be7030398	-47.1904	0.113541	-4.47947	7.5206e-06	5.01269e-05	-3.39831	Spirochaetes	Leptospirae	Leptospirales	Leptospiraceae	RBG-16-49-21	B11736_RBG-16-49-21	Not_predicted	Fer
b21b75979bd76543cda246a7bba3deae	-47.1904	0.113541	-4.47947	7.5206e-06	5.01269e-05	-3.39831	Spirochaetes	Spirochaetia	Brevinematales	Brevinemataceae	Brevinema	B10801_Brevinema	Not_predicted	Fer
b511c4af1def6a55232b645e8a642bb5	-44.3359	0.274856	-4.50958	6.52921e-06	4.42523e-05	-3.22761	Spirochaetes	Leptospirae	Leptospirales	Leptospiraceae	Leptonema	B8634_Leptonema	Not_predicted	Fer
b7406e268d020d349d77c84c83be8019	-53.6972	0.336202	-6.46265	1.05039e-10	1.49564e-09	-0.770155	Spirochaetes	Spirochaetia	Spirochaetales	Spirochaetaceae	Spirochaeta 2	B6769_Spirochaeta 2	Not_predicted	Fer
ea09e7b809433324f6d0b517afcb2ec3	-22.1896	0.616836	-5.153	2.58561e-07	2.26593e-06	1.24348	Spirochaetes	Spirochaetia	Spirochaetales	Spirochaetaceae	Spirochaeta 2	B2267_Spirochaeta 2	Not_predicted	Fer
FQ659268.1.1359	-41.9315	0.495768	-6.1138	9.89226e-10	1.22248e-08	0.00203206	Spirochaetes	Spirochaetia	Spirochaetales	Spirochaetaceae	uncultured	B2560_uncultured	Not_predicted	Fer
KJ578065.1.1510	-54.3596	0.14248	-4.90066	9.6196e-07	7.59467e-06	-3.2744	Spirochaetes	Spirochaetia	Spirochaetales	Spirochaetaceae	Spirochaeta 2	B3529_Spirochaeta 2	Not_predicted	Fer
KJ957694.1.1463	-23.2845	0.885358	-8.50044	2.00716e-17	6.96016e-16	19.4288	Spirochaetes	Spirochaetia	Spirochaetales	Spirochaetaceae	uncultured	B2708_uncultured	Not_predicted	Fer
6cfec728eb699f07319a5db7dbc7c175	-28.6106	1.72179	-11.2761	2.07245e-29	2.13755e-27	40.1155	TA06	uncultured soil bacterium	uncultured soil bacterium	uncultured soil bacterium	uncultured soil bacterium	B730_uncultured soil bacterium	Not_predicted	Fer
AB186797.1.1510	-46.567	0.479971	-8.13023	4.50892e-16	1.35417e-14	6.04115	TA06	uncultured soil bacterium	uncultured soil bacterium	uncultured soil bacterium	uncultured soil bacterium	B651_uncultured soil bacterium	Not_predicted	Fer
FQ659656.1.1377	-107.748	0.519542	-9.195	4.07375e-20	1.8412e-18	-0.23844	TA06	uncultured soil bacterium	uncultured soil bacterium	uncultured soil bacterium	uncultured soil bacterium	B738_uncultured soil bacterium	Not_predicted	Fer
HM243858.1.1506	-48.0371	0.160593	-2.93902	0.00329593	0.0127725	-4.38015	TA06	uncultured bacterium SHA-114	uncultured bacterium SHA-114	uncultured bacterium SHA-114	uncultured bacterium SHA-114	B10587_uncultured bacterium SHA-114	Not_predicted	Fer
05eed3720a4a56bfb0afa93ac9a9630a	-43.1216	0.243376	-3.26994	0.00107735	0.00464734	-4.18869	Verrucomicrobia	Verrucomicrobiae	S-BQ2-57 soil group	uncultured bacterium	uncultured bacterium	B3955_uncultured bacterium	Not_predicted	Fer
1cab603f6ac9215ae4ea281782bfaca9	-49.6864	0.178039	-6.36609	1.97734e-10	2.71926e-09	-0.496511	Verrucomicrobia	Verrucomicrobiae	Pedosphaerales	Pedosphaeraceae	#N/A	B8416_f_Pedosphaeraceae	Not_predicted	Fer
1d491ea08afdc61da5dfcaf19c341f28	-28.1145	0.433111	-4.88963	1.01739e-06	8.00087e-06	-0.893863	Verrucomicrobia	Verrucomicrobiae	S-BQ2-57 soil group	uncultured bacterium	uncultured bacterium	B2399_uncultured bacterium	Not_predicted	Fer
269f23d2fd1483dedd2a49de194f24f2	-52.7434	0.138889	-2.65657	0.00789972	0.0270527	-4.47737	Verrucomicrobia	Verrucomicrobiae	Pedosphaerales	Pedosphaeraceae	Pedosphaera	B5569_Pedosphaera	Not_predicted	Fer
5816b5796997b1b867eb9f4a7cbf6ab0	-59.0308	0.23312	-7.25219	4.23651e-13	8.5635e-12	0.411966	Verrucomicrobia	Verrucomicrobiae	S-BQ2-57 soil group	uncultured bacterium	uncultured bacterium	B6437_uncultured bacterium	Not_predicted	Fer
5c9d3057e9ed4b7880fa03f702bdefb0	-64.211	0.214664	-3.92858	8.57105e-05	0.000461523	-4.18814	Verrucomicrobia	Verrucomicrobiae	Pedosphaerales	Pedosphaeraceae	ADurb.Bin063-1	B2789_ADurb.Bin063-1	Not_predicted	Fer
6352a41823129025ec76c917da5948e6	-13.2348	0.57928	-4.7278	2.28367e-06	1.69328e-05	2.3505	Verrucomicrobia	Verrucomicrobiae	S-BQ2-57 soil group	uncultured bacterium	uncultured bacterium	B4104_uncultured bacterium	Not_predicted	Fer
6f58f487832874ce6112ce8cf42fed06	-17.6742	0.272471	-2.53118	0.0113747	0.0367213	-3.94551	Verrucomicrobia	Verrucomicrobiae	S-BQ2-57 soil group	uncultured bacterium	uncultured bacterium	B3804_uncultured bacterium	Not_predicted	Fer
8cf36e20993191f5f525e67920f95436	-85.7333	0.353209	-11.055	2.46201e-28	2.30312e-26	8.12735	Verrucomicrobia	Verrucomicrobiae	Pedosphaerales	Pedosphaeraceae	#N/A	B1056_f_Pedosphaeraceae	Not_predicted	Fer
8d34fbb449800b73ab40341805e35a2b	-28.8577	0.0718045	-2.58577	0.00972256	0.0322815	-4.27497	Verrucomicrobia	Verrucomicrobiae	Methylacidiphilales	Methylacidiphilaceae	uncultured	B16628_uncultured	Not_predicted	Fer
a069deac99f1a5db3c30133d8280f42c	-58.5382	0.153432	-5.27736	1.32299e-07	1.215e-06	-3.05379	Verrucomicrobia	Verrucomicrobiae	Pedosphaerales	Pedosphaeraceae	#N/A	B6791_f_Pedosphaeraceae	Not_predicted	Fer
aacefa208cfbfa543f8792145dcb6277	-45.835	0.330158	-8.25389	1.61853e-16	5.10632e-15	6.83217	Verrucomicrobia	Verrucomicrobiae	Pedosphaerales	Pedosphaeraceae	#N/A	B5432_f_Pedosphaeraceae	Not_predicted	Fer
AB487323.1.1412	-79.5919	0.492002	-15.9181	9.84449e-57	1.13141e-53	44.5973	Verrucomicrobia	Verrucomicrobiae	Pedosphaerales	Pedosphaeraceae	ADurb.Bin063-1	B1772_ADurb.Bin063-1	Not_predicted	Fer
AB600430.1.1416	-45.0866	0.15073	-2.7585	0.00581145	0.0207949	-4.40921	Verrucomicrobia	Verrucomicrobiae	Opitutales	Opitutaceae	Lacunisphaera	B3927_Lacunisphaera	Not_predicted	Fer
AB672152.1.1493	-73.5199	0.857791	-15.8705	2.08363e-56	2.09535e-53	48.9171	Verrucomicrobia	Verrucomicrobiae	Pedosphaerales	Pedosphaeraceae	#N/A	B382_f_Pedosphaeraceae	Not_predicted	Fer
AB672187.1.1491	-23.6105	0.443406	-2.47412	0.0133638	0.0420625	-4.21867	Verrucomicrobia	Verrucomicrobiae	Pedosphaerales	Pedosphaeraceae	ADurb.Bin063-1	B175_ADurb.Bin063-1	Not_predicted	Fer
b0200dc3b6649bacd43bb0bceffdbefb	-17.0168	0.686511	-4.56389	5.04864e-06	3.48041e-05	0.594497	Verrucomicrobia	Verrucomicrobiae	Chthoniobacterales	Chthoniobacteraceae	#N/A	B2056_f_Chthoniobacteraceae	Not_predicted	Fer
b6543956bebfa89519f6bf3bdab09d34	-42.3222	0.151651	-5.42255	5.93736e-08	5.75495e-07	-1.65342	Verrucomicrobia	Verrucomicrobiae	Chthoniobacterales	Chthoniobacteraceae	Chthoniobacter	B11623_Chthoniobacter	Not_predicted	Fer
c4a241e55a441dfe42fc99e416ceb9af	-85.1717	0.211927	-7.63174	2.41006e-14	5.77052e-13	-1.34038	Verrucomicrobia	Verrucomicrobiae	Pedosphaerales	Pedosphaeraceae	uncultured verrucomicrobium DEV008	B1835_uncultured verrucomicrobium DEV008	Not_predicted	Fer
cb99f07c38d68aa34f56114a3afa64dc	-72.9329	0.244827	-2.50253	0.012338	0.0393105	-4.54655	Verrucomicrobia	Verrucomicrobiae	Pedosphaerales	Pedosphaeraceae	SCGC AAA164-E04	B11868_SCGC AAA164-E04	Not_predicted	Fer
d38258ab7a5fa38a9b4beab220c40d13	-50.4996	0.125654	-4.52497	6.07189e-06	4.13269e-05	-3.4901	Verrucomicrobia	Verrucomicrobiae	Chthoniobacterales	Chthoniobacteraceae	LD29	B14927_LD29	Not_predicted	Fer
d5c9497053d2402185f2a62373c49543	-35.606	0.327032	-5.33621	9.58453e-08	9.00789e-07	-0.984718	Verrucomicrobia	Verrucomicrobiae	Chthoniobacterales	Chthoniobacteraceae	Chthoniobacter	B4423_Chthoniobacter	Not_predicted	Fer
db623bbd67acfeb804799b39dc77749b	-83.0907	0.206748	-7.44527	1.00304e-13	2.17505e-12	-1.5004	Verrucomicrobia	Verrucomicrobiae	Pedosphaerales	Pedosphaeraceae	uncultured Prosthecobacter sp.	B5603_uncultured Prosthecobacter sp.	Not_predicted	Fer
e1070348f9fa4f23dbe4467a5e94f7df	-21.1269	0.324746	-2.86764	0.00413939	0.0155759	-3.7882	Verrucomicrobia	Verrucomicrobiae	Pedosphaerales	Pedosphaeraceae	uncultured Crater Lake bacterium CL120-133	B3186_uncultured Crater Lake bacterium CL120-133	Not_predicted	Fer
e54fc30ce749eaa978f8a903fd5eeb18	-27.8764	0.344962	-4.08517	4.42004e-05	0.000253632	-2.60885	Verrucomicrobia	Verrucomicrobiae	Chthoniobacterales	Chthoniobacteraceae	Chthoniobacter	B5536_Chthoniobacter	Not_predicted	Fer
EF516529.1.1485	-14.81	0.379102	-2.79132	0.00525386	0.0189965	-3.40835	Verrucomicrobia	Verrucomicrobiae	Chthoniobacterales	Chthoniobacteraceae	Chthoniobacter	B4413_Chthoniobacter	Not_predicted	Fer
EF516658.1.1502	-110.398	0.265618	-10.4793	1.23567e-25	9.20463e-24	2.25602	Verrucomicrobia	Verrucomicrobiae	Pedosphaerales	Pedosphaeraceae	ADurb.Bin063-1	B1279_ADurb.Bin063-1	Not_predicted	Fer
EU135415.1.1315	-57.4868	0.191858	-4.4445	8.85277e-06	5.84254e-05	-3.77865	Verrucomicrobia	Verrucomicrobiae	S-BQ2-57 soil group	uncultured bacterium	uncultured bacterium	B4167_uncultured bacterium	Not_predicted	Fer
FJ437748.1.1502	-59.0045	0.146817	-5.28705	1.25489e-07	1.15898e-06	-3.06449	Verrucomicrobia	Verrucomicrobiae	Verrucomicrobiales	Rubritaleaceae	Luteolibacter	B12291_Luteolibacter	Not_predicted	Fer
FJ478682.1.1516	-36.8605	0.13208	-4.72276	2.34095e-06	1.72621e-05	-2.39184	Verrucomicrobia	Verrucomicrobiae	Opitutales	Opitutaceae	Cephaloticoccus	B12040_Cephaloticoccus	Not_predicted	Fer
FJ592707.1.1406	-50.3209	0.395145	-4.80066	1.59179e-06	1.21499e-05	-3.19837	Verrucomicrobia	Verrucomicrobiae	Pedosphaerales	Pedosphaeraceae	bacterium enrichment culture clone auto67_4W	B2691_bacterium enrichment culture clone auto67_4W	Not_predicted	Fer
FJ801187.1.1525	-24.5737	0.0880535	-3.14851	0.00164325	0.00680037	-3.68067	Verrucomicrobia	Verrucomicrobiae	Opitutales	Opitutaceae	Alterococcus	B19140_Alterococcus	Not_predicted	Fer
FJ822624.1.1384	-73.7214	0.19413	-3.71318	0.000205172	0.00102906	-4.3461	Verrucomicrobia	Verrucomicrobiae	Chthoniobacterales	Chthoniobacteraceae	Candidatus Udaeobacter	B2210_Candidatus Udaeobacter	Not_predicted	Fer
FJ946521.1.1290	-18.4259	0.622309	-2.74965	0.00597073	0.0212448	-3.75442	Verrucomicrobia	Verrucomicrobiae	Chthoniobacterales	Chthoniobacteraceae	Candidatus Udaeobacter	B5027_Candidatus Udaeobacter	Not_predicted	Fer
FPLS01044078.1.1220	-49.9641	0.583516	-10.6213	2.74694e-26	2.14554e-24	18.8024	Verrucomicrobia	Verrucomicrobiae	Pedosphaerales	Pedosphaeraceae	uncultured Desulfovibrio sp.	B1594_uncultured Desulfovibrio sp.	Not_predicted	Fer
FPLS01051725.16.1237	-50.71	0.122009	-4.81356	1.49249e-06	1.14572e-05	-3.20271	Verrucomicrobia	Verrucomicrobiae	Pedosphaerales	Pedosphaeraceae	uncultured Desulfovibrio sp.	B6451_uncultured Desulfovibrio sp.	Not_predicted	Fer
GU127811.1.1481	-49.043	0.117998	-4.65532	3.25362e-06	2.34291e-05	-3.2971	Verrucomicrobia	Verrucomicrobiae	S-BQ2-57 soil group	uncultured bacterium	uncultured bacterium	B5441_uncultured bacterium	Not_predicted	Fer
HM069059.1.1529	-124.7	0.416153	-11.8607	2.37705e-32	3.24124e-30	4.23104	Verrucomicrobia	Verrucomicrobiae	Pedosphaerales	Pedosphaeraceae	uncultured Prosthecobacter sp.	B267_uncultured Prosthecobacter sp.	Not_predicted	Fer
HM243932.1.1382	-103.804	0.442582	-12.0326	3.04491e-33	4.62194e-31	8.11702	Verrucomicrobia	Verrucomicrobiae	Pedosphaerales	Pedosphaeraceae	ADurb.Bin063-1	B1275_ADurb.Bin063-1	Not_predicted	Fer
JF176663.1.1380	-53.5387	0.639972	-8.79123	1.5856e-18	6.34619e-17	6.87195	Verrucomicrobia	Verrucomicrobiae	Chthoniobacterales	Chthoniobacteraceae	Chthoniobacter	B2565_Chthoniobacter	Not_predicted	Fer
JF183161.1.1360	-51.4844	0.134944	-4.64145	3.47972e-06	2.47957e-05	-3.41671	Verrucomicrobia	Verrucomicrobiae	Verrucomicrobiales	Rubritaleaceae	Luteolibacter	B8114_Luteolibacter	Not_predicted	Fer
JN038922.1.1514	-93.538	0.246313	-4.71131	2.47635e-06	1.81938e-05	-4.1821	Verrucomicrobia	Verrucomicrobiae	Pedosphaerales	Pedosphaeraceae	ADurb.Bin063-1	B547_ADurb.Bin063-1	Not_predicted	Fer
KX239078.1.1518	-57.7923	0.516039	-12.3016	1.15443e-34	2.15987e-32	26.9318	Verrucomicrobia	Verrucomicrobiae	Chthoniobacterales	Chthoniobacteraceae	Candidatus Udaeobacter	B370_Candidatus Udaeobacter	Not_predicted	Fer
LN571555.1.1401	-23.2564	0.0833333	-2.97973	0.00288815	0.0113675	-3.78825	Verrucomicrobia	Verrucomicrobiae	Pedosphaerales	Pedosphaeraceae	Oikopleura dioica	B19610_Oikopleura dioica	Not_predicted	Fer
35f8cf39364ff3dc32ab094333090e13	-46.9781	0.212329	-2.8498	0.00437878	0.0163165	-4.39793	WS1	#N/A	#N/A	#N/A	#N/A	B12610_o_NA	Not_predicted	Fer
c7606f38800e0df911a0822a52ecee1f	-28.4393	0.682232	-6.7283	1.75874e-11	2.81854e-10	5.77904	WS1	uncultured bacterium	uncultured bacterium	uncultured bacterium	uncultured bacterium	B4903_uncultured bacterium	Not_predicted	Fer
32ccf4dbd67fc384b48958e842104087	-61.8538	0.148821	-5.87136	4.38432e-09	4.95391e-08	-2.49064	WS2	uncultured bacterium	uncultured bacterium	uncultured bacterium	uncultured bacterium	B1599_uncultured bacterium	Not_predicted	Fer
bc7e7366ebdcaaa257efa7ce62f51b13	-27.3952	0.0718045	-2.46974	0.0135285	0.0424308	-4.30529	WS2	uncultured bacterium	uncultured bacterium	uncultured bacterium	uncultured bacterium	B13085_uncultured bacterium	Not_predicted	Fer
e12d0d84c4d8191e5998bbda303e6332	-29.7821	0.215599	-2.70659	0.00680297	0.0238891	-4.22964	WS2	uncultured bacterium	uncultured bacterium	uncultured bacterium	uncultured bacterium	B10995_uncultured bacterium	Not_predicted	Fer
AB486853.1.1358	-36.7724	0.270969	-6.60029	4.19695e-11	6.3467e-10	2.60588	WS4	uncultured bacterium	uncultured bacterium	uncultured bacterium	uncultured bacterium	B8230_uncultured bacterium	Not_predicted	Fer
bf7106b7ef74ea74b6f6e7eba90f09aa	-77.9308	0.25472	-7.07133	1.5804e-12	2.95683e-11	-1.74673	Zixibacteria	uncultured bacterium	uncultured bacterium	uncultured bacterium	uncultured bacterium	B1468_uncultured bacterium	Not_predicted	Fer
ce3a9a103dedb134b603de7b08d5e747	-46.7304	0.359484	-7.59832	3.11953e-14	7.3168e-13	3.80977	Zixibacteria	bacterium enrichment culture clone Anammox_55	bacterium enrichment culture clone Anammox_55	bacterium enrichment culture clone Anammox_55	bacterium enrichment culture clone Anammox_55	B1541_bacterium enrichment culture clone Anammox_55	Not_predicted	Fer
EF203188.1.1518	-8.30373	2.4611	-3.18535	0.00144779	0.00608542	-1.63942	Zixibacteria	uncultured bacterium	uncultured bacterium	uncultured bacterium	uncultured bacterium	B660_uncultured bacterium	Not_predicted	Fer
0e2412c3203b153e1fb5a7ff7ebf015c	-38.3522	0.0922758	-3.64051	0.000272717	0.00133456	-3.82749	#N/A	#N/A	#N/A	#N/A	#N/A	B18430_o_NA	Not_predicted	Fer
3553588add76f7ccba846e4f6714f3e7	-42.129	0.239093	-4.29785	1.732e-05	0.000108099	-3.35374	#N/A	#N/A	#N/A	#N/A	#N/A	B7361_o_NA	Not_predicted	Fer
6063e2754a82a819c3292aec1c3b900d	-22.9902	0.304202	-3.63067	0.000283328	0.00137893	-2.88315	#N/A	#N/A	#N/A	#N/A	#N/A	B2859_o_NA	Not_predicted	Fer
64e952cdaaa2c5e4e26d4ab8ef3aec68	-47.1904	0.113541	-4.47947	7.5206e-06	5.01269e-05	-3.39831	#N/A	#N/A	#N/A	#N/A	#N/A	B16291_o_NA	Not_predicted	Fer
7ee678e0b28dc8f25a1bc03a6ce5f721	-11.7279	0.528206	-4.28482	1.8366e-05	0.000114008	1.08581	#N/A	#N/A	#N/A	#N/A	#N/A	B4194_o_NA	Not_predicted	Fer
8029376dc359bba079fc3c8e3b719d23	-56.7257	0.216871	-6.97379	3.1724e-12	5.72241e-11	0.0318853	#N/A	#N/A	#N/A	#N/A	#N/A	B4263_o_NA	Not_predicted	Fer
973d426f78360e42383074b5de92b8e5	-21.2992	0.406143	-3.48733	0.000488815	0.00228104	-2.9483	#N/A	#N/A	#N/A	#N/A	#N/A	B2737_o_NA	Not_predicted	Fer
9fbe5e181a3a274b9929fdc7921493a9	-21.3858	0.324234	-3.99634	6.45377e-05	0.000359312	-1.9547	#N/A	#N/A	#N/A	#N/A	#N/A	B5736_o_NA	Not_predicted	Fer
AB600408.1.1359	-11.9269	1.0592	-4.51513	6.36054e-06	4.31819e-05	1.90679	#N/A	#N/A	#N/A	#N/A	#N/A	B1278_o_NA	Not_predicted	Fer
c6871ce74f39c5a187968add63d392b2	-41.389	0.0995823	-3.92877	8.56403e-05	0.000461471	-3.69002	#N/A	#N/A	#N/A	#N/A	#N/A	B12540_o_NA	Not_predicted	Fer
cc094dd19a1225db65e50dfc63e012ec	-31.3404	0.0779821	-2.80823	0.00498583	0.0180992	-4.20667	#N/A	#N/A	#N/A	#N/A	#N/A	B19933_o_NA	Not_predicted	Fer
d3403627827978352f46ae76ae7fbe1f	-29.8438	0.0718045	-2.83287	0.00461739	0.0170087	-4.15687	#N/A	#N/A	#N/A	#N/A	#N/A	B5394_o_NA	Not_predicted	Fer
d419d7adb8cf8d5fa23639bcd8fa95f4	-26.8821	0.1679	-2.65498	0.00793698	0.0270793	-4.19183	#N/A	#N/A	#N/A	#N/A	#N/A	B10127_o_NA	Not_predicted	Fer
ec4044073df5369d4ac52df7777925a0	-7.82623	0.311102	-2.88628	0.00390201	0.0148354	-2.31907	#N/A	#N/A	#N/A	#N/A	#N/A	B12556_o_NA	Not_predicted	Fer
eed2e19b6a6382ea89c1cb99e6800789	-16.2674	0.151651	-3.17726	0.00148877	0.00625111	-2.92023	#N/A	#N/A	#N/A	#N/A	#N/A	B17301_o_NA	Not_predicted	Fer
f82bebf2361d8695a806e9e23bef8780	-6.11301	0.990521	-2.66503	0.00770368	0.0265309	-2.62096	#N/A	#N/A	#N/A	#N/A	#N/A	B2403_o_NA	Not_predicted	Fer
AB486755.1.1397	-69.3915	0.286658	-6.48554	9.02912e-11	1.29251e-09	-2.08156	Acidobacteria	Subgroup 6	uncultured Holophaga sp.	uncultured Holophaga sp.	uncultured Holophaga sp.	B922_uncultured Holophaga sp.	Oligo	Fer
AB672228.1.1423	-45.7742	0.628191	-10.0882	7.01768e-24	4.41072e-22	17.3702	Acidobacteria	Acidobacteriia	Solibacterales	Solibacteraceae (Subgroup 3)	#N/A	B1358_f_Solibacteraceae (Subgroup 3)	Oligo	Fer
cf2ae9113af0de9d6211bf04ef2f0ea3	-12.5471	1.03069	-2.85927	0.00425022	0.0158963	-3.04245	Acidobacteria	Subgroup 11	uncultured Acidobacterium sp.	uncultured Acidobacterium sp.	uncultured Acidobacterium sp.	B1919_uncultured Acidobacterium sp.	Oligo	Fer
d1223fcdfbfa6fedf36979db00f7a5b3	-33.6858	0.372733	-5.65384	1.58843e-08	1.66827e-07	0.184605	Acidobacteria	Subgroup 6	#N/A	#N/A	#N/A	B6411_o_NA	Oligo	Fer
EF492968.1.1477	-66.6419	0.545506	-9.25134	2.41341e-20	1.1223e-18	5.35586	Acidobacteria	Acidobacteriia	Subgroup 12	uncultured bacterium	uncultured bacterium	B3105_uncultured bacterium	Oligo	Fer
EU276438.1.1487	-46.334	0.534702	-4.15254	3.30038e-05	0.00019409	-3.67373	Acidobacteria	Subgroup 6	unidentified	unidentified	unidentified	B606_unidentified	Oligo	Fer
FPLS01017206.11.1491	-90.4006	0.238052	-4.55328	5.3098e-06	3.65105e-05	-4.21066	Acidobacteria	Acidobacteriia	Solibacterales	Solibacteraceae (Subgroup 3)	Candidatus Solibacter	B156_Candidatus Solibacter	Oligo	Fer
HQ674935.1.1491	-33.8614	0.335965	-5.3743	7.76623e-08	7.38526e-07	-0.615902	Acidobacteria	Acidobacteriia	Acidobacteriales	uncultured	uncultured bacterium	B2323_uncultured bacterium	Oligo	Fer
JF265781.1.1378	-69.7293	0.30402	-9.41707	5.08078e-21	2.46234e-19	5.29341	Acidobacteria	Holophagae	Subgroup 7	#N/A	#N/A	B3162_o_Subgroup 7	Oligo	Fer
13fac62bf97846a139eef1b14ec960b5	-57.7258	0.138889	-5.47952	4.31155e-08	4.29819e-07	-2.77085	Actinobacteria	Coriobacteriia	CG2-30-50-142	Actinobacteria bacterium CG2_30_50_142	Actinobacteria bacterium CG2_30_50_142	B6670_Actinobacteria bacterium CG2_30_50_142	Oligo	Fer
e67c1bf7dcbe17ab6089726452ce6f10	-12.5484	0.418614	-2.6471	0.00812429	0.027648	-3.40685	Actinobacteria	Coriobacteriia	CG2-30-50-142	Actinobacteria bacterium CG2_30_50_142	Actinobacteria bacterium CG2_30_50_142	B4661_Actinobacteria bacterium CG2_30_50_142	Oligo	Fer
EU132562.1.1357	-68.9482	0.737646	-13.5303	1.51938e-41	5.31453e-39	30.0619	Actinobacteria	Thermoleophilia	Gaiellales	Gaiellaceae	Gaiella	B1053_Gaiella	Oligo	Fer
EU132794.1.1350	-53.8262	0.524328	-8.86202	8.44134e-19	3.51868e-17	7.10355	Actinobacteria	Acidimicrobiia	Microtrichales	#N/A	#N/A	B743_o_Microtrichales	Oligo	Fer
EU133195.1.1383	-16.5767	0.587771	-4.04326	5.28923e-05	0.000297565	-0.943255	Actinobacteria	Thermoleophilia	Gaiellales	uncultured	#N/A	B1240_f_uncultured	Oligo	Fer
FPLL01008785.12.1530	-23.4639	0.345867	-3.55547	0.000378097	0.00179563	-3.05337	Actinobacteria	Thermoleophilia	Gaiellales	uncultured	metagenome	B5879_metagenome	Oligo	Fer
KC442629.1.1355	-60.1506	1.40326	-16.3565	8.815e-60	1.77292e-56	67.5072	Actinobacteria	Thermoleophilia	Gaiellales	#N/A	#N/A	B568_o_Gaiellales	Oligo	Fer
KT342857.7981.9515	-11.3673	1.52515	-4.36059	1.30303e-05	8.33957e-05	1.47286	Actinobacteria	Thermoleophilia	Gaiellales	uncultured	uncultured bacterium 5G12	B595_uncultured bacterium 5G12	Oligo	Fer
EU979052.1.1473	-21.4019	0.329041	-3.50223	0.000462299	0.00216484	-2.93393	Armatimonadetes	uncultured	uncultured actinobacterium	uncultured actinobacterium	uncultured actinobacterium	B3216_uncultured actinobacterium	Oligo	Fer
HG529163.1.1258	-22.4401	0.352189	-3.06907	0.00214984	0.00872629	-3.64119	Armatimonadetes	Chthonomonadetes	Chthonomonadales	Chthonomonadaceae	Chthonomonas	B3543_Chthonomonas	Oligo	Fer
38e6dd8248deff3273583b219f5d23d4	-15.814	0.977553	-4.11452	3.89398e-05	0.000225862	-0.560866	Bacteroidetes	Ignavibacteria	Kryptoniales	BSV26	uncultured Chlorobi bacterium	B1367_uncultured Chlorobi bacterium	Oligo	Fer
45f9a36e7f78017e03c052c6bf8d8f27	-22.9399	0.171387	-2.49234	0.0126978	0.0402813	-4.18822	Bacteroidetes	Ignavibacteria	Kryptoniales	MSB-3C8	uncultured Chloroflexi bacterium	B5965_uncultured Chloroflexi bacterium	Oligo	Fer
9c910caa4b58f9112c41c347ff5ece7d	-96.9457	0.399487	-4.10442	4.06795e-05	0.000235105	-4.37442	Bacteroidetes	Ignavibacteria	Kryptoniales	BSV26	#N/A	B3254_f_BSV26	Oligo	Fer
aac7f37c5629bc02c4414d2ca0d2d57e	-39.4565	0.174595	-3.39306	0.000692375	0.00312228	-4.04198	Bacteroidetes	Bacteroidia	Sphingobacteriales	NS11-12 marine group	#N/A	B12663_f_NS11-12 marine group	Oligo	Fer
AB930678.1.1461	-10.317	0.757035	-2.90278	0.00370234	0.0141297	-2.64995	Bacteroidetes	Ignavibacteria	Kryptoniales	BSV26	uncultured Chlorobi bacterium	B569_uncultured Chlorobi bacterium	Oligo	Fer
FPLL01007766.1.1284	-36.4046	0.265777	-5.06324	4.15507e-07	3.53356e-06	-1.70034	Bacteroidetes	Bacteroidia	Sphingobacteriales	env.OPS 17	uncultured soil bacterium	B4457_uncultured soil bacterium	Oligo	Fer
FPLS01008969.8.1534	-37.3832	1.70124	-12.9019	6.02584e-38	1.67165e-35	49.4587	Bacteroidetes	Bacteroidia	Chitinophagales	Saprospiraceae	Phaeodactylibacter	B811_Phaeodactylibacter	Oligo	Fer
JF703332.1.1426	-12.1872	0.827207	-2.79574	0.00518258	0.0187641	-3.11412	Bacteroidetes	Bacteroidia	Cytophagales	Microscillaceae	#N/A	B3330_f_Microscillaceae	Oligo	Fer
JF703539.1.1400	-69.0853	0.288854	-3.94083	8.14509e-05	0.000442154	-4.23623	Bacteroidetes	Ignavibacteria	OPB56	#N/A	#N/A	B4018_o_OPB56	Oligo	Fer
JN820191.1.1493	-44.5157	0.148821	-2.72357	0.00646308	0.0228251	-4.41462	Bacteroidetes	Bacteroidia	Chitinophagales	Chitinophagaceae	Terrimonas	B1226_Terrimonas	Oligo	Fer
JX489946.1.1490	-23.1235	1.44701	-6.16608	7.12197e-10	9.00884e-09	5.1425	Bacteroidetes	Bacteroidia	Chitinophagales	Chitinophagaceae	UTBCD1	B384_UTBCD1	Oligo	Fer
a3d94d9ec516fe35ce974fc42489f3c4	-21.5508	0.287218	-2.87794	0.00400666	0.0151759	-3.80129	Chlamydiae	Chlamydiae	Chlamydiales	Parachlamydiaceae	#N/A	B9286_f_Parachlamydiaceae	Oligo	Fer
301adc7b7c1f6a2daa5d43b72b8813b8	-14.5229	1.20042	-4.06901	4.73788e-05	0.000270243	-0.393022	Chloroflexi	KD4-96	#N/A	#N/A	#N/A	B806_o_NA	Oligo	Fer
665a63f453040ebd71673f7afc59ada4	-46.068	0.493379	-7.06095	1.70286e-12	3.16595e-11	2.05558	Chloroflexi	Anaerolineae	Anaerolineales	Anaerolineaceae	Anaerolinea	B1350_Anaerolinea	Oligo	Fer
ae62e8c05200ff7f32d598758e5f3ebc	-22.15	0.440011	-3.58625	0.000336192	0.00161665	-2.87008	Chloroflexi	Anaerolineae	Anaerolineales	Anaerolineaceae	Anaerolinea	B2740_Anaerolinea	Oligo	Fer
AM934825.1.1337	-34.5916	0.393895	-5.37192	7.8691e-08	7.46543e-07	-0.740872	Chloroflexi	JG30-KF-CM66	metagenome	metagenome	metagenome	B5414_metagenome	Oligo	Fer
AY922044.1.1353	-15.8585	3.17077	-6.56505	5.31735e-11	7.93656e-10	10.5361	Chloroflexi	KD4-96	metagenome	metagenome	metagenome	B31_metagenome	Oligo	Fer
d4e9939eb45b9faeb8031ff3309e4a2b	-55.1516	0.305984	-3.33206	0.000863474	0.00382525	-4.31718	Chloroflexi	Anaerolineae	Anaerolineales	Anaerolineaceae	uncultured	B2578_uncultured	Oligo	Fer
dc4899213abf91006909f929301397f2	-15.5494	1.19278	-4.47326	7.74208e-06	5.15605e-05	0.683433	Chloroflexi	Ktedonobacteria	C0119	uncultured bacterium	uncultured bacterium	B2042_uncultured bacterium	Oligo	Fer
ddfa3383bf9545ca7bab792085a245a1	-20.0281	0.413829	-3.73063	0.000191481	0.000967022	-2.33181	Chloroflexi	TK10	uncultured bacterium	uncultured bacterium	uncultured bacterium	B2147_uncultured bacterium	Oligo	Fer
DQ137946.1.1220	-7.79319	3.5536	-3.69555	0.000219947	0.00109769	-0.0145353	Chloroflexi	Anaerolineae	Anaerolineales	Anaerolineaceae	uncultured	B125_uncultured	Oligo	Fer
EF020015.1.1359	-13.3526	1.10328	-4.65527	3.25443e-06	2.34291e-05	2.02101	Chloroflexi	Anaerolineae	Anaerolineales	Anaerolineaceae	uncultured	B1322_uncultured	Oligo	Fer
EF464632.1.1356	-132.77	0.44837	-12.2264	2.90146e-34	5.0744e-32	4.27085	Chloroflexi	Anaerolineae	SJA-15	#N/A	#N/A	B322_o_SJA-15	Oligo	Fer
EF594053.1.1456	-22.2824	0.486352	-5.28998	1.23499e-07	1.14332e-06	1.71817	Chloroflexi	Anaerolineae	Ardenticatenales	uncultured	uncultured prokaryote	B3441_uncultured prokaryote	Oligo	Fer
f41ce68356e0136ddf09b3a821b22e27	-13.1377	0.387536	-2.83107	0.0046435	0.0170493	-3.16465	Chloroflexi	#N/A	#N/A	#N/A	#N/A	B8402_o_NA	Oligo	Fer
f717fe571be40ab823f7b108d37e10f2	-75.5272	0.198885	-3.80414	0.000142683	0.000737714	-4.33277	Chloroflexi	Anaerolineae	RBG-13-54-9	uncultured bacterium	uncultured bacterium	B3059_uncultured bacterium	Oligo	Fer
FPLS01045121.1.1220	-48.7807	0.400408	-7.04319	1.93415e-12	3.57706e-11	1.46483	Chloroflexi	TK10	#N/A	#N/A	#N/A	B2094_o_NA	Oligo	Fer
HQ844554.1.1431	-9.25363	4.39365	-4.38806	1.14898e-05	7.43651e-05	2.17569	Chloroflexi	KD4-96	uncultured Chloroflexi bacterium	uncultured Chloroflexi bacterium	uncultured Chloroflexi bacterium	B133_uncultured Chloroflexi bacterium	Oligo	Fer
KM200401.1.1502	-14.703	0.681777	-5.26112	1.44517e-07	1.32269e-06	4.14762	Chloroflexi	Ktedonobacteria	Ktedonobacterales	JG30-KF-AS9	uncultured bacterium	B5860_uncultured bacterium	Oligo	Fer
KX752989.1.1468	-15.5883	0.363245	-3.59176	0.000329174	0.0015848	-1.93994	Chloroflexi	Chloroflexia	Thermomicrobiales	JG30-KF-CM45	uncultured Sphaerobacter sp.	B5960_uncultured Sphaerobacter sp.	Oligo	Fer
AB486181.1.1305	-40.2037	0.216871	-2.49096	0.0127472	0.0404065	-4.44539	Cyanobacteria	Oxyphotobacteria	Oxyphotobacteria Incertae Sedis	Unknown Family	#N/A	B3922_f_Unknown Family	Oligo	Fer
JQ769963.1.1460	-13.338	0.516538	-3.03709	0.00239157	0.0096153	-2.80599	Cyanobacteria	Oxyphotobacteria	Oxyphotobacteria Incertae Sedis	Unknown Family	Oscillatoria SAG 1459-8	B6728_Oscillatoria SAG 1459-8	Oligo	Fer
540b5105d66813906b149efe769cde0e	-26.6079	0.381725	-5.18158	2.21951e-07	1.96868e-06	0.237268	Elusimicrobia	Elusimicrobia	MVP-88	uncultured bacterium	uncultured bacterium	B4548_uncultured bacterium	Oligo	Fer
EF632927.1.1251	-55.6859	0.423067	-5.58116	2.41729e-08	2.48684e-07	-2.51305	Firmicutes	Clostridia	Clostridiales	Clostridiaceae 1	Clostridium sensu stricto 13	B598_Clostridium sensu stricto 13	Oligo	Fer
EU912454.1.1453	-20.1232	0.271246	-2.69361	0.00707368	0.0246905	-3.91287	Firmicutes	Bacilli	Bacillales	Paenibacillaceae	Paenibacillus	B8344_Paenibacillus	Oligo	Fer
GQ487969.1.1565	-25.236	0.732629	-4.96737	6.83745e-07	5.57318e-06	-0.114989	Firmicutes	Clostridia	Clostridiales	Ruminococcaceae	#N/A	B1355_f_Ruminococcaceae	Oligo	Fer
HE576092.1.1311	-23.9957	0.30189	-3.51242	0.00044494	0.00209085	-3.16769	Firmicutes	Bacilli	Lactobacillales	Carnobacteriaceae	Trichococcus	B3054_Trichococcus	Oligo	Fer
JF169102.1.1345	-49.1601	1.02214	-10.5399	6.51975e-26	4.94824e-24	18.6685	Firmicutes	Clostridia	Clostridiales	Ruminococcaceae	#N/A	B2503_f_Ruminococcaceae	Oligo	Fer
JN036545.1.1507	-17.4444	0.396817	-6.05473	1.4293e-09	1.72137e-08	6.93644	Firmicutes	Bacilli	Bacillales	Bacillaceae	Pseudogracilibacillus	B6228_Pseudogracilibacillus	Oligo	Fer
KJ568483.1.1487	-39.4583	0.901734	-7.35263	2.01132e-13	4.22483e-12	4.83776	Gemmatimonadetes	Gemmatimonadetes	Gemmatimonadales	Gemmatimonadaceae	uncultured	B2960_uncultured	Oligo	Fer
5a69f990c7b2f4f9b66952e79f3d1f18	-40.8317	0.697298	-9.01756	2.0767e-19	8.93427e-18	12.9377	Kiritimatiellaeota	Kiritimatiellae	WCHB1-41	uncultured Verrucomicrobia bacterium	uncultured Verrucomicrobia bacterium	B2767_uncultured Verrucomicrobia bacterium	Oligo	Fer
9af22c7d8e2bf128896bf86749a6ccaa	-7.33739	0.511519	-2.57497	0.0100314	0.03317	-2.9403	Nitrospirae	Thermodesulfovibrionia	uncultured	#N/A	#N/A	B7824_o_uncultured	Oligo	Fer
AB364845.1.1446	-21.3484	0.720211	-4.02902	5.61971e-05	0.000315716	-1.87423	Nitrospirae	Thermodesulfovibrionia	uncultured	uncultured bacterium	uncultured bacterium	B332_uncultured bacterium	Oligo	Fer
DQ138964.1.1518	-10.5688	3.44986	-4.34172	1.42002e-05	9.02375e-05	1.62872	Nitrospirae	4-29-1	uncultured bacterium	uncultured bacterium	uncultured bacterium	B132_uncultured bacterium	Oligo	Fer
EU335184.1.1526	-8.16809	1.82649	-2.84865	0.00439463	0.0163528	-2.45519	Nitrospirae	4-29-1	uncultured bacterium	uncultured bacterium	uncultured bacterium	B693_uncultured bacterium	Oligo	Fer
FJ755761.1.1520	-19.8982	0.999451	-5.04343	4.60902e-07	3.87862e-06	1.49786	Nitrospirae	4-29-1	#N/A	#N/A	#N/A	B417_o_NA	Oligo	Fer
JN038761.1.1480	-17.011	2.62313	-6.81356	9.76678e-12	1.63695e-10	11.4737	Nitrospirae	Thermodesulfovibrionia	uncultured	uncultured bacterium	uncultured bacterium	B353_uncultured bacterium	Oligo	Fer
JN540191.1.1299	-53.8797	0.779926	-11.8245	3.65015e-32	4.73637e-30	25.5453	Nitrospirae	Thermodesulfovibrionia	uncultured	uncultured Sphingobacteriales bacterium	uncultured Sphingobacteriales bacterium	B1643_uncultured Sphingobacteriales bacterium	Oligo	Fer
05a2c33167f8610b17f2c83ef46966b1	-25.0435	0.191858	-4.12601	3.70472e-05	0.000215662	-2.19807	Omnitrophicaeota	Omnitrophia	Omnitrophales	Omnitrophaceae	Candidatus Omnitrophus	B13855_Candidatus Omnitrophus	Oligo	Fer
2d2bd94291fec6b08d649948eca3a431	-23.7892	0.662255	-8.07607	7.02963e-16	2.05649e-14	16.0269	Omnitrophicaeota	uncultured bacterium	uncultured bacterium	uncultured bacterium	uncultured bacterium	B4896_uncultured bacterium	Oligo	Fer
14db7473f8fa077e81448cc3f90a48d8	-10.4543	0.260357	-3.61069	0.000306056	0.00148237	-0.851529	Patescibacteria	Saccharimonadia	Saccharimonadales	wastewater metagenome	wastewater metagenome	B12743_wastewater metagenome	Oligo	Fer
9690f4d305c8282194ca9e183acc3427	-39.9397	0.0960953	-3.79121	0.000150318	0.000772721	-3.75693	Patescibacteria	Parcubacteria	Candidatus Moranbacteria	uncultured Parcubacteria group bacterium	uncultured Parcubacteria group bacterium	B12239_uncultured Parcubacteria group bacterium	Oligo	Fer
DQ676382.1.1369	-11.8448	0.325396	-3.91725	8.98356e-05	0.000481818	-0.2185	Patescibacteria	Microgenomatia	Candidatus Woesebacteria	uncultured Microgenomates group bacterium	uncultured Microgenomates group bacterium	B9423_uncultured Microgenomates group bacterium	Oligo	Fer
4435b8cb7256af8565b42aa5889369b7	-35.4159	0.312966	-4.26271	2.02805e-05	0.000125216	-2.98974	Planctomycetes	Phycisphaerae	Phycisphaerales	Phycisphaeraceae	SM1A02	B4685_SM1A02	Oligo	Fer
914e9c98c89b2b5127fd9652a5798a1c	-8.67835	1.06319	-2.68968	0.00715745	0.0249487	-2.86923	Planctomycetes	Planctomycetacia	Gemmatales	Gemmataceae	uncultured	B877_uncultured	Oligo	Fer
EF020259.1.1395	-47.4225	0.117998	-4.24925	2.15366e-05	0.00013206	-3.62781	Planctomycetes	OM190	uncultured bacterium	uncultured bacterium	uncultured bacterium	B5849_uncultured bacterium	Oligo	Fer
FPLS01049893.1.1217	-31.7371	0.334869	-6.66248	2.75606e-11	4.24761e-10	4.31604	Planctomycetes	OM190	metagenome	metagenome	metagenome	B3451_metagenome	Oligo	Fer
JF129097.1.1358	-37.8187	1.02673	-9.55793	1.32315e-21	6.65296e-20	18.1394	Planctomycetes	Planctomycetacia	Planctomycetales	uncultured	uncultured Planctomyces sp.	B688_uncultured Planctomyces sp.	Oligo	Fer
171fa51be16491bd9e0610b70d405f0a	-21.6273	1.07648	-7.64535	2.16897e-14	5.25584e-13	14.3376	Proteobacteria	Deltaproteobacteria	Myxococcales	#N/A	#N/A	B3241_o_Myxococcales	Oligo	Fer
6a1ce157774e061800e306a4c21f62a1	-12.4385	1.06997	-4.72398	2.32703e-06	1.71962e-05	2.59148	Proteobacteria	Deltaproteobacteria	Myxococcales	mle1-27	Myxococcales bacterium Gsoil 473	B2445_Myxococcales bacterium Gsoil 473	Oligo	Fer
812655d62904ba6024a0c2d8908cb319	-29.5715	0.542164	-6.72558	1.79181e-11	2.86583e-10	5.34515	Proteobacteria	Deltaproteobacteria	Myxococcales	P3OB-42	uncultured bacterium	B4687_uncultured bacterium	Oligo	Fer
a1124ee1a8116de6a3585495af6a7273	-9.44413	0.240901	-3.21434	0.00130931	0.00557913	-1.76382	Proteobacteria	Gammaproteobacteria	Methylococcales	Methylococcaceae	Methylomagnum	B6765_Methylomagnum	Oligo	Fer
AB486056.1.1372	-71.3343	0.575759	-13.8499	1.93903e-43	7.09068e-41	31.2522	Proteobacteria	Gammaproteobacteria	Betaproteobacteriales	SC-I-84	#N/A	B181_f_SC-I-84	Oligo	Fer
AB649023.1.1495	-62.0797	1.23615	-13.4868	2.72968e-41	9.15012e-39	34.2534	Proteobacteria	Gammaproteobacteria	Betaproteobacteriales	Burkholderiaceae	#N/A	B326_f_Burkholderiaceae	Oligo	Fer
AJ534620.1.1236	-15.2927	1.11413	-5.56796	2.60742e-08	2.67219e-07	5.37023	Proteobacteria	Alphaproteobacteria	Rhizobiales	uncultured	uncultured Hyphomicrobiaceae bacterium	B408_uncultured Hyphomicrobiaceae bacterium	Oligo	Fer
b90e949827c0307ba8b941b392224130	-9.87152	1.05462	-2.75778	0.00582437	0.0208253	-2.88866	Proteobacteria	Gammaproteobacteria	Acidiferrobacterales	Acidiferrobacteraceae	uncultured	B1922_uncultured	Oligo	Fer
CU921835.1.1310	-92.9034	0.231165	-8.32452	8.95422e-17	2.89304e-15	-0.711176	Proteobacteria	Alphaproteobacteria	Rhizobiales	Rhizobiales Incertae Sedis	uncultured	B1359_uncultured	Oligo	Fer
DQ837235.1.1375	-34.7735	0.697789	-5.77132	7.97062e-09	8.74811e-08	0.316936	Proteobacteria	Alphaproteobacteria	Rhizobiales	Xanthobacteraceae	Pseudolabrys	B721_Pseudolabrys	Oligo	Fer
e82fc2d23fe64a177d300f9ec6f5045e	-19.2347	0.322809	-3.73389	0.000189019	0.000955787	-2.20894	Proteobacteria	Gammaproteobacteria	Acidiferrobacterales	Acidiferrobacteraceae	Sulfurifustis	B6603_Sulfurifustis	Oligo	Fer
EF019260.1.1382	-31.4403	0.801587	-10.5102	8.92748e-26	6.7123e-24	30.3133	Proteobacteria	Gammaproteobacteria	Betaproteobacteriales	SC-I-84	uncultured Nitrosomonadaceae bacterium	B1976_uncultured Nitrosomonadaceae bacterium	Oligo	Fer
EF555484.1.1202	-21.1974	0.351598	-2.97423	0.00294043	0.0115523	-3.67254	Proteobacteria	Alphaproteobacteria	Rhizobiales	Rhizobiaceae	Mesorhizobium	B3234_Mesorhizobium	Oligo	Fer
EU528194.1.1340	-21.9265	2.6481	-8.62239	6.99254e-18	2.55704e-16	21.2554	Proteobacteria	Gammaproteobacteria	Betaproteobacteriales	SC-I-84	#N/A	B649_f_SC-I-84	Oligo	Fer
FJ391498.1.1433	-69.5371	0.391465	-8.54479	1.37009e-17	4.81325e-16	2.40035	Proteobacteria	Gammaproteobacteria	Betaproteobacteriales	Gallionellaceae	Sideroxydans	B193_Sideroxydans	Oligo	Fer
FJ625344.1.1537	-112.115	0.312409	-3.58928	0.000332308	0.00159893	-4.49933	Proteobacteria	Gammaproteobacteria	Diplorickettsiales	Diplorickettsiaceae	uncultured	B7383_uncultured	Oligo	Fer
FPLS01008945.16.1464	-51.4844	0.134944	-4.64145	3.47972e-06	2.47957e-05	-3.41671	Proteobacteria	Deltaproteobacteria	Myxococcales	Sandaracinaceae	Sandaracinus	B7146_Sandaracinus	Oligo	Fer
FPLS01010349.15.1481	-55.1701	1.04123	-13.3457	1.8039e-40	5.5817e-38	38.1351	Proteobacteria	Deltaproteobacteria	Myxococcales	Haliangiaceae	Haliangium	B345_Haliangium	Oligo	Fer
FPLS01046662.16.1394	-35.6691	1.62371	-9.58773	9.92909e-22	5.12048e-20	19.6649	Proteobacteria	Alphaproteobacteria	Rhizobiales	Xanthobacteraceae	uncultured	B439_uncultured	Oligo	Fer
FR687516.1.1446	-51.2167	0.422875	-6.26947	3.68997e-10	4.85967e-09	-0.901935	Proteobacteria	Alphaproteobacteria	Rhizobiales	Xanthobacteraceae	Pseudolabrys	B514_Pseudolabrys	Oligo	Fer
GQ261282.1.1474	-65.0723	0.479961	-9.11602	8.44321e-20	3.73218e-18	5.1977	Proteobacteria	Gammaproteobacteria	Ectothiorhodospirales	Thioalkalispiraceae	Thioalkalispira	B369_Thioalkalispira	Oligo	Fer
HG380571.1.1408	-27.606	0.484317	-6.20371	5.61298e-10	7.27156e-09	3.70857	Proteobacteria	Gammaproteobacteria	Betaproteobacteriales	Hydrogenophilaceae	Thiobacillus	B516_Thiobacillus	Oligo	Fer
HM274460.1.1355	-11.2964	0.827426	-2.81787	0.00483865	0.017678	-2.95988	Proteobacteria	Deltaproteobacteria	Oligoflexales	Oligoflexaceae	Oligoflexus	B5564_Oligoflexus	Oligo	Fer
HM773455.1.1237	-26.88	1.16726	-6.28136	3.41911e-10	4.52413e-09	4.28995	Proteobacteria	Alphaproteobacteria	Rhizobiales	Devosiaceae	Devosia	B379_Devosia	Oligo	Fer
HM921139.1.1346	-6.82597	0.811745	-2.42555	0.0152933	0.0471763	-3.18012	Proteobacteria	Deltaproteobacteria	Myxococcales	KD3-10	uncultured delta proteobacterium	B2177_uncultured delta proteobacterium	Oligo	Fer
JF266080.1.1386	-53.2606	0.211315	-6.50372	8.00421e-11	1.16234e-09	-0.628292	Proteobacteria	Deltaproteobacteria	#N/A	#N/A	#N/A	B3392_o_NA	Oligo	Fer
JN038644.1.1524	-34.95	2.69303	-13.8707	1.45506e-43	5.57427e-41	63.6453	Proteobacteria	Deltaproteobacteria	MBNT15	uncultured Syntrophaceae bacterium	uncultured Syntrophaceae bacterium	B84_uncultured Syntrophaceae bacterium	Oligo	Fer
JN626569.1.1377	-71.1135	0.187263	-3.58183	0.000341925	0.00164226	-4.36479	Proteobacteria	Deltaproteobacteria	Desulfuromonadales	Geobacteraceae	Geobacter	B3798_Geobacter	Oligo	Fer
JQ238984.1.1502	-52.0705	0.174077	-3.18579	0.00144559	0.00607934	-4.33745	Proteobacteria	Gammaproteobacteria	Betaproteobacteriales	Nitrosomonadaceae	#N/A	B3410_f_Nitrosomonadaceae	Oligo	Fer
JQ427494.1.1444	-31.957	0.435785	-4.08645	4.39585e-05	0.000252785	-2.97987	Proteobacteria	Alphaproteobacteria	uncultured	#N/A	#N/A	B2875_o_uncultured	Oligo	Fer
JQ978556.1.1520	-16.668	1.49952	-6.78619	1.18056e-11	1.93592e-10	11.4786	Proteobacteria	Gammaproteobacteria	Gammaproteobacteria Incertae Sedis	Unknown Family	Candidatus Berkiella	B964_Candidatus Berkiella	Oligo	Fer
JX505263.1.1480	-31.1268	0.955654	-10.1557	3.53202e-24	2.29154e-22	27.4003	Proteobacteria	Deltaproteobacteria	Desulfuromonadales	Geobacteraceae	Geobacter	B672_Geobacter	Oligo	Fer
KC961267.1.1497	-15.6548	0.291049	-2.59206	0.00954657	0.031789	-3.75268	Proteobacteria	Gammaproteobacteria	Betaproteobacteriales	Gallionellaceae	Sideroxydans	B1227_Sideroxydans	Oligo	Fer
KJ783217.1.1480	-38.8315	0.336202	-5.80963	6.34742e-09	7.04345e-08	-0.298065	Proteobacteria	Deltaproteobacteria	SAR324 clade(Marine group B)	uncultured prokaryote	uncultured prokaryote	B9453_uncultured prokaryote	Oligo	Fer
KJ878612.1.1217	-68.601	0.622177	-8.76884	1.93358e-18	7.62532e-17	3.25654	Proteobacteria	Gammaproteobacteria	Betaproteobacteriales	Burkholderiaceae	#N/A	B1592_f_Burkholderiaceae	Oligo	Fer
KM205491.1.1487	-90.5571	0.378225	-3.96089	7.49048e-05	0.000410217	-4.37721	Proteobacteria	Deltaproteobacteria	Syntrophobacterales	Syntrophaceae	Desulfobacca	B1804_Desulfobacca	Oligo	Fer
KX508079.1.1490	-56.047	0.423994	-6.17131	6.89096e-10	8.78571e-09	-1.58995	Proteobacteria	Gammaproteobacteria	Betaproteobacteriales	Burkholderiaceae	#N/A	B1766_f_Burkholderiaceae	Oligo	Fer
KY121987.1.1436	-11.814	1.85069	-4.08618	4.4009e-05	0.000252895	0.353662	Proteobacteria	Alphaproteobacteria	Rhizobiales	Beijerinckiaceae	Rhodoblastus	B805_Rhodoblastus	Oligo	Fer
5b1c5395d62673bbe72c1d680572ba76	-12.1644	0.610584	-4.31161	1.62776e-05	0.000102547	1.06095	Spirochaetes	Leptospirae	Leptospirales	Leptospiraceae	uncultured	B4834_uncultured	Oligo	Fer
836ccd06f398d8f998f42d22c5c2af64	-12.9797	0.727922	-3.87354	0.000107578	0.000567519	-0.629588	Spirochaetes	Leptospirae	Leptospirales	Leptospiraceae	#N/A	B5572_f_Leptospiraceae	Oligo	Fer
40ca92dd61126791102c8c83b533dc88	-22.4187	0.736669	-7.85778	4.0883e-15	1.08362e-13	15.3236	Verrucomicrobia	Verrucomicrobiae	Pedosphaerales	Pedosphaeraceae	uncultured bacterium	B1435_uncultured bacterium	Oligo	Fer
EF600577.1.1340	-48.6649	0.549798	-6.11196	1.0007e-09	1.23475e-08	-0.943679	Verrucomicrobia	Verrucomicrobiae	Chthoniobacterales	Chthoniobacteraceae	Candidatus Udaeobacter	B237_Candidatus Udaeobacter	Oligo	Fer
FPLS01011457.8.1337	-33.4747	0.276018	-3.30951	0.000936106	0.00411528	-3.92714	Verrucomicrobia	Verrucomicrobiae	Verrucomicrobiales	Verrucomicrobiaceae	Roseimicrobium	B7789_Roseimicrobium	Oligo	Fer
GQ402650.1.1491	-95.127	0.756628	-17.7766	3.32147e-70	1.33606e-66	51.8205	Verrucomicrobia	Verrucomicrobiae	Pedosphaerales	Pedosphaeraceae	ADurb.Bin063-1	B342_ADurb.Bin063-1	Oligo	Fer
JF833475.1.1465	-24.3627	1.64869	-4.35381	1.34395e-05	8.56738e-05	-1.59629	Verrucomicrobia	Verrucomicrobiae	Chthoniobacterales	Chthoniobacteraceae	Candidatus Udaeobacter	B746_Candidatus Udaeobacter	Oligo	Fer
9121976b42791abc5c14642c49a9058f	-7.57323	0.55052	-2.53285	0.0113208	0.0365768	-3.05025	WOR-1	uncultured bacterium	uncultured bacterium	uncultured bacterium	uncultured bacterium	B6618_uncultured bacterium	Oligo	Fer
f48392da1e953275f051eb54dc3e6037	-11.0273	1.21489	-3.08903	0.00201059	0.0082233	-2.34602	WOR-1	#N/A	#N/A	#N/A	#N/A	B2125_o_NA	Oligo	Fer
bbe88fd0a682df5b49d2447fc3717d83	-8.95796	0.901873	-3.3731	0.000744539	0.0033388	-1.23885	Zixibacteria	uncultured prokaryote	uncultured prokaryote	uncultured prokaryote	uncultured prokaryote	B952_uncultured prokaryote	Oligo	Fer
8744637370be7e3ba33c649d66710149	-11.2254	0.87288	-4.47109	7.82093e-06	5.20425e-05	1.94349	#N/A	#N/A	#N/A	#N/A	#N/A	B4659_o_NA	Oligo	Fer
AB748652.1.1448	12.7127	0.348659	2.96649	0.00301539	0.011822	-2.85979	Acidobacteria	Acidobacteriia	Acidobacteriales	uncultured	uncultured bacterium DA038	B498_uncultured bacterium DA038	Copio	Non-fer
DQ083119.1.1512	13.632	0.545975	3.00742	0.00263775	0.0105053	-2.90321	Acidobacteria	Subgroup 6	unidentified	unidentified	unidentified	B701_unidentified	Copio	Non-fer
EU449666.1.1462	27.5034	0.427734	7.14543	9.25096e-13	1.79335e-11	8.29364	Acidobacteria	Subgroup 6	#N/A	#N/A	#N/A	B605_o_NA	Copio	Non-fer
FJ004751.1.1321	48.5439	0.210902	6.95675	3.57975e-12	6.37148e-11	1.24767	Acidobacteria	Acidobacteriia	Solibacterales	Solibacteraceae (Subgroup 3)	Bryobacter	B349_Bryobacter	Copio	Non-fer
GU983332.1.1357	12.247	0.463136	3.06467	0.00218171	0.00884226	-2.59187	Acidobacteria	Acidobacteriia	Solibacterales	Solibacteraceae (Subgroup 3)	Bryobacter	B599_Bryobacter	Copio	Non-fer
HQ330575.1.1385	91.15	0.3593	10.7921	4.38305e-27	3.8749e-25	5.97263	Acidobacteria	Aminicenantia	Aminicenantales	uncultured prokaryote	uncultured prokaryote	B1115_uncultured prokaryote	Copio	Non-fer
HQ597930.1.1458	7.97988	0.614966	2.95378	0.00314237	0.0122661	-2.17964	Acidobacteria	Acidobacteriia	Solibacterales	Solibacteraceae (Subgroup 3)	Candidatus Solibacter	B510_Candidatus Solibacter	Copio	Non-fer
JQ655798.1.1466	63.6907	0.173554	5.32392	1.02551e-07	9.60443e-07	-3.22303	Acidobacteria	Acidobacteriia	Acidobacteriales	#N/A	#N/A	B2108_o_Acidobacteriales	Copio	Non-fer
AM936376.1.1338	14.3797	0.199717	3.13884	0.00169842	0.00701068	-2.7475	Actinobacteria	Actinobacteria	Frankiales	Geodermatophilaceae	Blastococcus	B670_Blastococcus	Copio	Non-fer
EU861970.1.1512	16.1389	1.42124	3.88426	0.000102942	0.000544845	-1.29445	Actinobacteria	Thermoleophilia	Gaiellales	uncultured	#N/A	B158_f_uncultured	Copio	Non-fer
GQ369053.1.1260	8.52351	7.94785	5.20381	1.96995e-07	1.75506e-06	6.03003	Actinobacteria	Actinobacteria	Micrococcales	Intrasporangiaceae	Terrabacter	B6_Terrabacter	Copio	Non-fer
HG917253.1.1486	65.026	0.164743	4.55267	5.3252e-06	3.65851e-05	-3.87919	Actinobacteria	Actinobacteria	Frankiales	Geodermatophilaceae	Blastococcus	B657_Blastococcus	Copio	Non-fer
HM270023.1.1366	31.1935	0.806764	4.73416	2.21334e-06	1.64569e-05	-1.73428	Actinobacteria	Thermoleophilia	Gaiellales	uncultured	#N/A	B141_f_uncultured	Copio	Non-fer
HM270061.1.1366	13.3165	0.18495	2.90675	0.00365564	0.0139779	-3.05097	Actinobacteria	Thermoleophilia	Solirubrobacterales	Solirubrobacteraceae	Conexibacter	B399_Conexibacter	Copio	Non-fer
HM335016.1.1335	74.7781	0.189449	5.23544	1.66099e-07	1.50311e-06	-3.63617	Actinobacteria	Actinobacteria	Frankiales	uncultured	#N/A	B398_f_uncultured	Copio	Non-fer
KC554269.1.1519	15.0939	0.209636	2.77001	0.00561007	0.0201307	-3.46721	Actinobacteria	Actinobacteria	Propionibacteriales	Nocardioidaceae	Nocardioides	B538_Nocardioides	Copio	Non-fer
KF956776.1.1443	9.91043	2.60722	3.29492	0.000986064	0.004302	-1.63671	Actinobacteria	Actinobacteria	Frankiales	Geodermatophilaceae	Blastococcus	B122_Blastococcus	Copio	Non-fer
a02c2dbc292c0f091c90c4972b0625f9	31.6703	0.755576	4.54212	5.59879e-06	3.82687e-05	-2.18314	Bacteroidetes	Bacteroidia	Sphingobacteriales	Lentimicrobiaceae	#N/A	B486_f_Lentimicrobiaceae	Copio	Non-fer
EU133650.1.1359	7.13333	7.00005	4.11407	3.9015e-05	0.000226135	1.60704	Bacteroidetes	Bacteroidia	Chitinophagales	Chitinophagaceae	uncultured	B4_uncultured	Copio	Non-fer
EU937875.1.1490	9.72033	2.98346	3.14919	0.00163941	0.00679148	-1.97988	Bacteroidetes	Bacteroidia	Chitinophagales	Chitinophagaceae	Ferruginibacter	B241_Ferruginibacter	Copio	Non-fer
HM243889.1.1474	6.77284	4.6844	3.56886	0.000359297	0.00172159	-0.243959	Bacteroidetes	Bacteroidia	Bacteroidales	Prolixibacteraceae	uncultured	B154_uncultured	Copio	Non-fer
JF176932.1.1343	56.7279	0.239195	4.32869	1.50662e-05	9.54392e-05	-3.84123	Bacteroidetes	Bacteroidia	Cytophagales	Spirosomaceae	Larkinella	B7389_Larkinella	Copio	Non-fer
aa98446a40277f2a9c273cffa5e1450f	41.7448	0.10576	2.92268	0.00347387	0.0133273	-4.32226	Chlamydiae	Chlamydiae	Chlamydiales	Parachlamydiaceae	#N/A	B11162_f_Parachlamydiaceae	Copio	Non-fer
035912e7874635f19ba29bd20736a555	10.3365	0.577466	3.67804	0.000235589	0.0011685	-0.620127	Chloroflexi	Ktedonobacteria	Ktedonobacterales	JG30-KF-AS9	uncultured bacterium	B2977_uncultured bacterium	Copio	Non-fer
276a4ed40970946b07394aabe3f2b3a4	56.2387	0.14248	3.93744	8.26074e-05	0.000446024	-4.06912	Chloroflexi	Anaerolineae	RBG-13-54-9	uncultured bacterium	uncultured bacterium	B2157_uncultured bacterium	Copio	Non-fer
31610257d458e108718a34edad7cfcca	14	0.194444	2.65613	0.00791005	0.0270527	-3.53341	Chloroflexi	Anaerolineae	SBR1031	A4b	wastewater metagenome	B3440_wastewater metagenome	Copio	Non-fer
802848c7c94e01a10b663b6d7496eeef	38.1809	0.134944	5.06236	4.17438e-07	3.5425e-06	-1.90607	Chloroflexi	Anaerolineae	Anaerolineales	Anaerolineaceae	Leptolinea	B5218_Leptolinea	Copio	Non-fer
8771345a86a2f6905ede3adff07eef24	56.8781	0.193494	4.24796	2.16613e-05	0.000132622	-3.89861	Chloroflexi	Anaerolineae	RBG-13-54-9	#N/A	#N/A	B3878_o_RBG-13-54-9	Copio	Non-fer
89c8ea6ccbe4dc515b33e8685f49c241	36.4224	0.0922758	2.55005	0.0107776	0.0350751	-4.39642	Chloroflexi	Anaerolineae	Anaerolineales	Anaerolineaceae	uncultured	B8380_uncultured	Copio	Non-fer
9ac34822577c55fb785077331429a67b	64.3784	0.222222	5.89649	3.76736e-09	4.29298e-08	-2.60085	Chloroflexi	TK10	uncultured bacterium	uncultured bacterium	uncultured bacterium	B2030_uncultured bacterium	Copio	Non-fer
bb689bec0268e89abd050991d0001e1e	7.27178	2.09225	2.87728	0.00401501	0.015186	-2.26383	Chloroflexi	Anaerolineae	SBR1031	uncultured bacterium	uncultured bacterium	B455_uncultured bacterium	Copio	Non-fer
EF019033.1.1358	13.4718	0.408098	3.14117	0.00168497	0.00695871	-2.61299	Chloroflexi	Anaerolineae	Anaerolineales	Anaerolineaceae	uncultured	B1072_uncultured	Copio	Non-fer
JF198782.1.1319	10.1806	0.597048	2.45727	0.0140074	0.0437628	-3.46791	Chloroflexi	Ktedonobacteria	C0119	uncultured bacterium	uncultured bacterium	B919_uncultured bacterium	Copio	Non-fer
KY190358.1.1403	67.8667	0.17194	4.75156	2.03127e-06	1.52015e-05	-3.8119	Chloroflexi	Chloroflexia	Chloroflexales	Roseiflexaceae	uncultured	B1001_uncultured	Copio	Non-fer
LC124504.1.1477	25.1431	1.51768	6.09897	1.08536e-09	1.32701e-08	4.09204	Chloroflexi	Anaerolineae	SJA-15	#N/A	#N/A	B69_o_SJA-15	Copio	Non-fer
1fa32085381b6ef72aa15281e19c4d6c	28.1757	0.0995823	3.73578	0.000187604	0.000949229	-3.18717	Elusimicrobia	Elusimicrobia	MD2894-B20	uncultured bacterium	uncultured bacterium	B8368_uncultured bacterium	Copio	Non-fer
89fb9fc9430fb8b96b86adc82edaab89	104.451	0.492889	7.57574	3.71142e-14	8.59506e-13	-2.40778	Firmicutes	Clostridia	Clostridiales	Heliobacteriaceae	Hydrogenispora	B1820_Hydrogenispora	Copio	Non-fer
AB186865.1.1470	55.7802	0.141318	3.90534	9.4373e-05	0.000501948	-4.07828	Firmicutes	Clostridia	Clostridiales	Clostridiaceae 1	Clostridium sensu stricto 12	B3046_Clostridium sensu stricto 12	Copio	Non-fer
d77f74fa679605d0630a62f87bc3eb82	46.1127	0.125654	3.85457	0.000116263	0.00060894	-3.9011	Firmicutes	Negativicutes	Selenomonadales	Veillonellaceae	Sporomusa	B2970_Sporomusa	Copio	Non-fer
AB240260.1.1484	15.5704	0.376376	2.96429	0.00303712	0.0118972	-3.21117	Gemmatimonadetes	Gemmatimonadetes	Gemmatimonadales	Gemmatimonadaceae	uncultured	B469_uncultured	Copio	Non-fer
d3bc4cc6f4d9b0d884bf93db9d792ec0	10.5122	0.902868	2.70142	0.00690979	0.0242008	-3.08102	Gemmatimonadetes	Gemmatimonadetes	Gemmatimonadales	Gemmatimonadaceae	Gemmatimonas	B261_Gemmatimonas	Copio	Non-fer
05f0d52e5bcf9feafe2823ee77435711	35.5776	0.976724	10.4319	2.03161e-25	1.47246e-23	26.4802	Latescibacteria	uncultured bacterium	uncultured bacterium	uncultured bacterium	uncultured bacterium	B1130_uncultured bacterium	Copio	Non-fer
AY921903.1.1408	48.9504	0.300826	5.23871	1.63188e-07	1.48344e-06	-2.55407	Latescibacteria	uncultured Pelobacter sp.	uncultured Pelobacter sp.	uncultured Pelobacter sp.	uncultured Pelobacter sp.	B872_uncultured Pelobacter sp.	Copio	Non-fer
fad227b171d22c4a3ecc7d454fd585c8	38.8118	0.10576	3.24428	0.00117922	0.00505426	-4.11892	Latescibacteria	Latescibacteria	Latescibacterales	Latescibacteraceae	Candidatus Latescibacter	B3049_Candidatus Latescibacter	Copio	Non-fer
KY287319.1.1489	10.3751	6.01014	4.82089	1.43874e-06	1.10762e-05	3.6697	Nitrospirae	Thermodesulfovibrionia	uncultured	uncultured prokaryote	uncultured prokaryote	B2_uncultured prokaryote	Copio	Non-fer
AB179678.1.1413	22.0642	0.0779821	2.92546	0.00344297	0.0132593	-3.77965	Patescibacteria	ABY1	Candidatus Magasanikbacteria	uncultured bacterium	uncultured bacterium	B7133_uncultured bacterium	Copio	Non-fer
a08f591220b9459d6b3caa93cde13d9c	32.651	0.551454	8.83781	1.04786e-18	4.27922e-17	16.092	Planctomycetes	Phycisphaerae	MSBL9	SG8-4	uncultured deep-sea bacterium	B968_uncultured deep-sea bacterium	Copio	Non-fer
KP763243.1.1521	48.8943	0.123873	3.42324	0.000619921	0.00281607	-4.20675	Planctomycetes	Phycisphaerae	Pla1 lineage	#N/A	#N/A	B3341_o_Pla1 lineage	Copio	Non-fer
22ae605d242510d111d9c499d4062977	42.8754	0.693362	5.98689	2.17202e-09	2.56216e-08	-0.469437	Proteobacteria	Deltaproteobacteria	Myxococcales	#N/A	#N/A	B1568_o_Myxococcales	Copio	Non-fer
64e42baf9358c7528508356f43d86b83	9.47897	3.00699	4.07985	4.52238e-05	0.00025932	0.939312	Proteobacteria	Deltaproteobacteria	Syntrophobacterales	Syntrophobacteraceae	Syntrophobacter	B109_Syntrophobacter	Copio	Non-fer
7d0d098fa603987f95ac2c1329360da3	14.3883	1.23127	3.30054	0.00096651	0.00422585	-2.41086	Proteobacteria	Gammaproteobacteria	Betaproteobacteriales	#N/A	#N/A	B367_o_Betaproteobacteriales	Copio	Non-fer
AJ581623.1.1457	17.7256	0.484213	6.20439	5.58885e-10	7.25198e-09	7.60764	Proteobacteria	Deltaproteobacteria	Myxococcales	Haliangiaceae	Haliangium	B437_Haliangium	Copio	Non-fer
AY395371.1.1464	19.8765	0.768259	4.51235	6.4445e-06	4.3715e-05	-0.2948	Proteobacteria	Deltaproteobacteria	Desulfarculales	Desulfarculaceae	uncultured	B647_uncultured	Copio	Non-fer
b7fbbb7dd13a147921349c12c1ecd65f	51.9228	0.149787	3.19695	0.00139083	0.00587361	-4.33232	Proteobacteria	Deltaproteobacteria	SAR324 clade(Marine group B)	metagenome	metagenome	B11858_metagenome	Copio	Non-fer
CU921546.1.1351	18.4282	0.587852	4.46774	7.94447e-06	5.28209e-05	-0.0895845	Proteobacteria	Gammaproteobacteria	Steroidobacterales	Steroidobacteraceae	uncultured	B1075_uncultured	Copio	Non-fer
d96ad368fd3288ab16706af9b149c254	60.6424	0.247414	4.87287	1.10754e-06	8.68437e-06	-3.5326	Proteobacteria	Alphaproteobacteria	#N/A	#N/A	#N/A	B222_o_NA	Copio	Non-fer
DQ066440.1.1292	37.7219	0.10279	3.15318	0.00161719	0.0067029	-4.14822	Proteobacteria	Alphaproteobacteria	Sphingomonadales	Sphingomonadaceae	Sphingopyxis	B9027_Sphingopyxis	Copio	Non-fer
DQ450774.1.1396	17.4755	0.242725	2.81707	0.00485075	0.0177142	-3.60369	Proteobacteria	Gammaproteobacteria	Betaproteobacteriales	Gallionellaceae	Sideroxydans	B268_Sideroxydans	Copio	Non-fer
EU266873.1.1530	24.0935	0.401537	3.1346	0.00172313	0.0070967	-3.66798	Proteobacteria	Deltaproteobacteria	Sva0485	#N/A	#N/A	B1960_o_Sva0485	Copio	Non-fer
EU360304.1.1433	7.60617	9.17669	4.64619	3.40077e-06	2.42761e-05	3.67906	Proteobacteria	Deltaproteobacteria	MBNT15	uncultured prokaryote	uncultured prokaryote	B1_uncultured prokaryote	Copio	Non-fer
f794a4bc30be1d3c6f18311fabe4cef1	45.9857	0.276425	4.67376	2.97487e-06	2.16e-05	-3.12249	Proteobacteria	Gammaproteobacteria	HOC36	uncultured soil bacterium	uncultured soil bacterium	B695_uncultured soil bacterium	Copio	Non-fer
FJ484736.1.1412	16.2911	0.226241	2.7365	0.00621471	0.0220252	-3.61683	Proteobacteria	Deltaproteobacteria	Sva0485	#N/A	#N/A	B249_o_Sva0485	Copio	Non-fer
FM200902.1.1416	7.3821	1.96525	3.29493	0.000986026	0.004302	-1.1792	Proteobacteria	Deltaproteobacteria	Myxococcales	Sandaracinaceae	Sandaracinus	B728_Sandaracinus	Copio	Non-fer
FQ659407.1.1359	33.5845	1.85621	12.2806	1.49433e-34	2.67153e-32	46.2194	Proteobacteria	Gammaproteobacteria	Betaproteobacteriales	Gallionellaceae	Sideroxydans	B27_Sideroxydans	Copio	Non-fer
FQ659575.1.1368	14.744	0.528061	5.44522	5.22937e-08	5.11804e-07	4.9927	Proteobacteria	Deltaproteobacteria	Myxococcales	P3OB-42	uncultured soil bacterium	B1920_uncultured soil bacterium	Copio	Non-fer
FR687483.1.1495	15.4964	0.215228	2.94003	0.00328524	0.0127372	-3.24311	Proteobacteria	Gammaproteobacteria	Betaproteobacteriales	SC-I-84	#N/A	B63_f_SC-I-84	Copio	Non-fer
HE589845.1.1475	19.1431	0.674385	6.53252	6.60837e-11	9.73705e-10	8.7637	Proteobacteria	Deltaproteobacteria	Desulfuromonadales	Geobacteraceae	Geobacter	B70_Geobacter	Copio	Non-fer
HE974826.1.1460	39.4249	0.655806	8.70678	3.34237e-18	1.27438e-16	11.7304	Proteobacteria	Alphaproteobacteria	Rhodospirillales	Rhodopirillaceae	Defluviicoccus	B29_Defluviicoccus	Copio	Non-fer
HM270165.1.1354	9.33234	3.94409	4.38415	1.16979e-05	7.55932e-05	2.1388	Proteobacteria	Gammaproteobacteria	Betaproteobacteriales	SC-I-84	#N/A	B25_f_SC-I-84	Copio	Non-fer
HM366508.1.1467	105.116	0.302634	4.23029	2.34332e-05	0.000142818	-4.3819	Proteobacteria	Alphaproteobacteria	Elsterales	uncultured	#N/A	B1014_f_uncultured	Copio	Non-fer
HQ698291.1.1217	6.701	4.89396	2.71353	0.00666227	0.0234618	-2.57324	Proteobacteria	Alphaproteobacteria	Rhizobiales	Xanthobacteraceae	#N/A	B41_f_Xanthobacteraceae	Copio	Non-fer
JF202198.1.1308	14.6341	2.99901	3.1272	0.00176708	0.00726797	-2.80505	Proteobacteria	Alphaproteobacteria	Rhizobiales	Xanthobacteraceae	#N/A	B138_f_Xanthobacteraceae	Copio	Non-fer
JF235770.1.1354	12.2476	3.06449	4.39053	1.13599e-05	7.35834e-05	1.33091	Proteobacteria	Gammaproteobacteria	Betaproteobacteriales	SC-I-84	#N/A	B211_f_SC-I-84	Copio	Non-fer
JF266167.1.1382	8.28092	0.581383	3.05562	0.00224862	0.00909508	-1.97365	Proteobacteria	Deltaproteobacteria	Desulfarculales	Desulfarculaceae	uncultured	B393_uncultured	Copio	Non-fer
JF429000.1.1537	7.1518	6.66672	4.21733	2.48198e-05	0.000150358	2.00218	Proteobacteria	Gammaproteobacteria	Xanthomonadales	Rhodanobacteraceae	#N/A	B9_f_Rhodanobacteraceae	Copio	Non-fer
JN626478.1.1357	16.1501	0.437809	2.97278	0.00295437	0.0115998	-3.25834	Proteobacteria	Gammaproteobacteria	Betaproteobacteriales	Gallionellaceae	#N/A	B165_f_Gallionellaceae	Copio	Non-fer
JX222398.1.1474	46.9271	0.453604	4.37647	1.2117e-05	7.79229e-05	-3.49035	Proteobacteria	Gammaproteobacteria	Betaproteobacteriales	Burkholderiaceae	Janthinobacterium	B634_Janthinobacterium	Copio	Non-fer
JX504958.1.1412	7.54461	4.29634	3.08681	0.00202571	0.00828091	-1.77737	Proteobacteria	Alphaproteobacteria	Rhizobiales	Xanthobacteraceae	#N/A	B26_f_Xanthobacteraceae	Copio	Non-fer
KC172206.1.1504	7.01711	7.59032	3.9749	7.06322e-05	0.000390272	1.11	Proteobacteria	Gammaproteobacteria	Xanthomonadales	Xanthomonadaceae	Luteimonas	B8_Luteimonas	Copio	Non-fer
KC358446.1.1261	22.5019	0.447568	3.51294	0.000444061	0.00208917	-3.02862	Proteobacteria	Gammaproteobacteria	Betaproteobacteriales	Burkholderiaceae	Ramlibacter	B504_Ramlibacter	Copio	Non-fer
KF428038.1.1493	14.6975	0.204131	3.20821	0.00133754	0.0056904	-2.65226	Proteobacteria	Gammaproteobacteria	Betaproteobacteriales	SC-I-84	uncultured proteobacterium	B1503_uncultured proteobacterium	Copio	Non-fer
KM410824.1.1460	14.5456	0.406513	3.03399	0.00241627	0.00970004	-2.97032	Proteobacteria	Deltaproteobacteria	Syntrophobacterales	Syntrophaceae	Desulfobacca	B354_Desulfobacca	Copio	Non-fer
LN570795.1.1387	140.654	0.358052	3.4428	0.000576786	0.00264552	-4.54362	Proteobacteria	Deltaproteobacteria	Myxococcales	Sandaracinaceae	uncultured	B737_uncultured	Copio	Non-fer
LXQJ01000056.13.1537	19.4983	1.67088	4.62895	3.69621e-06	2.62223e-05	0.163563	Proteobacteria	Gammaproteobacteria	Xanthomonadales	Xanthomonadaceae	Luteimonas	B329_Luteimonas	Copio	Non-fer
DQ067010.1.1423	11.7652	0.163407	2.40181	0.0163222	0.0499995	-3.69668	Rokubacteria	NC10	Rokubacteriales	uncultured soil bacterium	uncultured soil bacterium	B1016_uncultured soil bacterium	Copio	Non-fer
1b6b92a1374dec0925235807df1c9902	76.1202	0.29998	6.88984	5.736e-12	9.86029e-11	-1.90606	TA06	uncultured soil bacterium	uncultured soil bacterium	uncultured soil bacterium	uncultured soil bacterium	B2360_uncultured soil bacterium	Copio	Non-fer
6e07b19726d9c3acca024791777a6fea	67.017	0.326105	7.24075	4.60863e-13	9.24598e-12	-0.555135	TA06	#N/A	#N/A	#N/A	#N/A	B1771_o_NA	Copio	Non-fer
7e49d0c48d62d90e07795b1491ac9a48	33.8634	0.0922758	2.83065	0.00464962	0.0170493	-4.24526	Verrucomicrobia	Verrucomicrobiae	S-BQ2-57 soil group	uncultured Verrucomicrobiaceae bacterium	uncultured Verrucomicrobiaceae bacterium	B4781_uncultured Verrucomicrobiaceae bacterium	Copio	Non-fer
9891c15f1939856753315485f626db1d	50.9164	0.128996	3.56481	0.000364889	0.00174422	-4.17078	Verrucomicrobia	Verrucomicrobiae	Pedosphaerales	Pedosphaeraceae	ADurb.Bin063-1	B1720_ADurb.Bin063-1	Copio	Non-fer
EF019437.1.1411	11.8358	0.374185	3.92642	8.64838e-05	0.000465081	-0.186571	Verrucomicrobia	Verrucomicrobiae	Chthoniobacterales	Chthoniobacteraceae	Candidatus Udaeobacter	B248_Candidatus Udaeobacter	Copio	Non-fer
HM243795.1.1518	17.702	1.18393	3.80534	0.00014199	0.000734605	-1.79417	Verrucomicrobia	Verrucomicrobiae	Pedosphaerales	Pedosphaeraceae	ADurb.Bin063-1	B698_ADurb.Bin063-1	Copio	Non-fer
KC836749.1.1489	16.7324	0.232398	3.37448	0.000740818	0.00332583	-2.60123	Verrucomicrobia	Verrucomicrobiae	Pedosphaerales	Pedosphaeraceae	ADurb.Bin063-1	B588_ADurb.Bin063-1	Copio	Non-fer
KU519603.1.1436	30.0551	0.927941	6.54401	6.12065e-11	9.06826e-10	4.35856	Verrucomicrobia	Verrucomicrobiae	Pedosphaerales	Pedosphaeraceae	ADurb.Bin063-1	B99_ADurb.Bin063-1	Copio	Non-fer
42517b2cb37a6844417ab577076b6383	9.82433	0.408152	2.72091	0.00651546	0.0229798	-2.95582	Zixibacteria	uncultured bacterium	uncultured bacterium	uncultured bacterium	uncultured bacterium	B2407_uncultured bacterium	Copio	Non-fer
6dce085e2e89fa92bf31e9b36a26f136	7.5847	0.190843	2.62887	0.00857288	0.0289178	-2.85832	#N/A	#N/A	#N/A	#N/A	#N/A	B10101_o_NA	Copio	Non-fer
045a4bce4efea51b1178f8a6d8f4f52c	13.4133	0.531766	4.53038	5.91859e-06	4.03517e-05	1.51545	Acidobacteria	Subgroup 25	uncultured soil bacterium	uncultured soil bacterium	uncultured soil bacterium	B3503_uncultured soil bacterium	Not_predicted	Non-fer
0596d511c75d16af8ed6e8dd1eb7f132	20.7892	0.243927	3.73102	0.000191188	0.000966147	-2.43588	Acidobacteria	Acidobacteriia	Solibacterales	Solibacteraceae (Subgroup 3)	#N/A	B6234_f_Solibacteraceae (Subgroup 3)	Not_predicted	Non-fer
0729d30e27b4677eb7deafb75106d0e1	23.6595	0.10279	3.39061	0.000698607	0.00314686	-3.31552	Acidobacteria	Thermoanaerobaculia	Thermoanaerobaculales	Thermoanaerobaculaceae	TPD-58	B7043_TPD-58	Not_predicted	Non-fer
0a14c3c0d4d7d998f46c87b1f42c5e14	14.1589	0.25243	2.68746	0.00720511	0.0250714	-3.50224	Acidobacteria	Subgroup 17	#N/A	#N/A	#N/A	B5610_o_NA	Not_predicted	Non-fer
0beb6e517da4c3bdea53964f87f88762	50.5025	0.137617	4.22152	2.43636e-05	0.000148264	-3.7521	Acidobacteria	Subgroup 11	uncultured Acidobacteria bacterium	uncultured Acidobacteria bacterium	uncultured Acidobacteria bacterium	B13309_uncultured Acidobacteria bacterium	Not_predicted	Non-fer
1901d9350f7de306740334507e78126a	15.5406	0.300979	5.39363	6.97612e-08	6.68129e-07	4.44446	Acidobacteria	Acidobacteriia	Solibacterales	Solibacteraceae (Subgroup 3)	AKIW659	B5498_AKIW659	Not_predicted	Non-fer
1fda327433694aa24d9f70a2e26e22c5	15.3158	0.212728	2.46893	0.0135595	0.0424956	-3.87391	Acidobacteria	Subgroup 18	#N/A	#N/A	#N/A	B4895_o_NA	Not_predicted	Non-fer
2a2bc31d24beb9b4f37d9558ff2dd251	15.0938	0.209636	2.86365	0.00419192	0.0157002	-3.32411	Acidobacteria	Acidobacteriia	Acidobacteriales	#N/A	#N/A	B5337_o_Acidobacteriales	Not_predicted	Non-fer
2d401861e262b696f723bf0e0c7463f1	14.1106	0.19598	3.0801	0.00207184	0.00845661	-2.8265	Acidobacteria	Subgroup 6	#N/A	#N/A	#N/A	B5864_o_NA	Not_predicted	Non-fer
2e84657bafa86fb88696e460510464c5	57.1177	0.144707	3.99899	6.38219e-05	0.000355819	-4.05136	Acidobacteria	Subgroup 18	#N/A	#N/A	#N/A	B12476_o_NA	Not_predicted	Non-fer
36b90279dc9446ec9bdb8529467c6e44	18.1051	0.25146	3.43497	0.000593714	0.00271234	-2.66656	Acidobacteria	Subgroup 6	#N/A	#N/A	#N/A	B597_o_NA	Not_predicted	Non-fer
388a6b97d3f2abcb41958329d14c8277	39.2477	1.30152	5.91939	3.27933e-09	3.77428e-08	-0.0754392	Acidobacteria	Subgroup 6	#N/A	#N/A	#N/A	B591_o_NA	Not_predicted	Non-fer
3e796241fbb84e794535243171687fe8	55.3148	0.15073	4.62377	3.78966e-06	2.68378e-05	-3.57321	Acidobacteria	Acidobacteriia	Solibacterales	Solibacteraceae (Subgroup 3)	Candidatus Solibacter	B11698_Candidatus Solibacter	Not_predicted	Non-fer
462768e732d5055a6aeeef37cf44d8c6	48.8401	0.72004	12.2891	1.34656e-34	2.46206e-32	33.0539	Acidobacteria	Acidobacteriia	Solibacterales	Solibacteraceae (Subgroup 3)	AKIW659	B2034_AKIW659	Not_predicted	Non-fer
4c94197586d877cf97beab3f88f72ee4	10.6725	0.495722	3.83024	0.000128375	0.000668895	-0.215636	Acidobacteria	Subgroup 11	uncultured Acidobacterium sp.	uncultured Acidobacterium sp.	uncultured Acidobacterium sp.	B3426_uncultured Acidobacterium sp.	Not_predicted	Non-fer
59218e1156d5f6c49adc290b3d92f596	97.6863	0.414243	6.89899	5.37934e-12	9.28687e-11	-2.87469	Acidobacteria	Acidobacteriia	Solibacterales	Solibacteraceae (Subgroup 3)	Candidatus Solibacter	B3582_Candidatus Solibacter	Not_predicted	Non-fer
6ca8639bfa902997f21024910a05550e	11.9546	0.166036	2.60948	0.00907406	0.0303538	-3.40565	Acidobacteria	Subgroup 6	uncultured prokaryote	uncultured prokaryote	uncultured prokaryote	B9848_uncultured prokaryote	Not_predicted	Non-fer
70ccf3b52cdc23a22a248c3ae8c9e30e	14.3197	0.198885	2.87075	0.00409889	0.0154525	-3.23069	Acidobacteria	Thermoanaerobaculia	Thermoanaerobaculales	Thermoanaerobaculaceae	Subgroup 10	B6295_Subgroup 10	Not_predicted	Non-fer
7e177300c51c3222a8a3a0cf228dd959	11.9545	0.166036	2.44045	0.0146766	0.0456235	-3.65926	Acidobacteria	Acidobacteriia	Acidobacteriales	uncultured	uncultured Acidobacteriaceae bacterium	B4193_uncultured Acidobacteriaceae bacterium	Not_predicted	Non-fer
aab3e85c5ab0b971048edccb44fe932a	10.2725	0.409041	3.8742	0.000107286	0.000566351	0.0253441	Acidobacteria	Blastocatellia (Subgroup 4)	11-24	uncultured Acidobacteriales bacterium	uncultured Acidobacteriales bacterium	B3740_uncultured Acidobacteriales bacterium	Not_predicted	Non-fer
AB240301.1.1433	14.5336	0.201855	2.6672	0.00765412	0.0263878	-3.56509	Acidobacteria	Subgroup 17	#N/A	#N/A	#N/A	B1516_o_NA	Not_predicted	Non-fer
AB364775.1.1479	10.4111	0.247911	3.64139	0.000271793	0.00133165	-0.749266	Acidobacteria	Subgroup 17	uncultured proteobacterium	uncultured proteobacterium	uncultured proteobacterium	B4329_uncultured proteobacterium	Not_predicted	Non-fer
AB364805.1.1423	15.5758	0.216331	3.39994	0.000675201	0.00305168	-2.37823	Acidobacteria	Acidobacteriia	Solibacterales	Solibacteraceae (Subgroup 3)	Bryobacter	B507_Bryobacter	Not_predicted	Non-fer
AB486378.1.1395	15.6018	0.216692	2.96003	0.00307939	0.0120495	-3.22155	Acidobacteria	Holophagae	Subgroup 7	#N/A	#N/A	B581_o_Subgroup 7	Not_predicted	Non-fer
AB672245.1.1436	29.6803	0.713859	7.37196	1.74081e-13	3.6952e-12	8.55958	Acidobacteria	Acidobacteriia	Subgroup 12	uncultured bacterium	uncultured bacterium	B1847_uncultured bacterium	Not_predicted	Non-fer
AB672313.1.1423	35.2651	0.0960953	2.94781	0.00320365	0.0124449	-4.21122	Acidobacteria	Acidobacteriia	Acidobacteriales	uncultured	uncultured forest soil bacterium	B8145_uncultured forest soil bacterium	Not_predicted	Non-fer
AF523991.1.1257	18.4908	1.06214	6.75431	1.47092e-11	2.39545e-10	10.3676	Acidobacteria	Subgroup 18	uncultured prokaryote	uncultured prokaryote	uncultured prokaryote	B56_uncultured prokaryote	Not_predicted	Non-fer
AM162422.1.1495	90.7704	0.240605	2.58151	0.00984337	0.0326422	-4.55898	Acidobacteria	Acidobacteriia	Solibacterales	Solibacteraceae (Subgroup 3)	Candidatus Solibacter	B747_Candidatus Solibacter	Not_predicted	Non-fer
AM935546.1.1393	73.8288	0.413581	8.11808	4.98249e-16	1.49012e-14	0.657745	Acidobacteria	Subgroup 6	uncultured microorganism	uncultured microorganism	uncultured microorganism	B3497_uncultured microorganism	Not_predicted	Non-fer
AY963368.1.1424	15.1996	0.211109	3.06536	0.00217672	0.00882645	-2.99362	Acidobacteria	Acidobacteriia	Acidobacteriales	uncultured	#N/A	B5220_f_uncultured	Not_predicted	Non-fer
CU922866.1.1374	8.20424	4.86682	2.73205	0.00629922	0.0222953	-2.7185	Acidobacteria	Subgroup 6	uncultured bacterium 213	uncultured bacterium 213	uncultured bacterium 213	B64_uncultured bacterium 213	Not_predicted	Non-fer
d1665104979d0fe65446e2a7694e1151	16.7259	0.370132	3.56547	0.000363968	0.00174293	-2.19242	Acidobacteria	Holophagae	Subgroup 7	#N/A	#N/A	B1220_o_Subgroup 7	Not_predicted	Non-fer
d5c266424d3da4f779dad55d0a60c921	36.6649	0.482625	8.90564	5.71011e-19	2.40512e-17	14.3284	Acidobacteria	Thermoanaerobaculia	Thermoanaerobaculales	Thermoanaerobaculaceae	Subgroup 10	B1316_Subgroup 10	Not_predicted	Non-fer
def7a0b92bcc690d9af606c87b99eacb	12.478	0.191858	2.95456	0.00313451	0.0122473	-2.85136	Acidobacteria	Subgroup 25	uncultured Acidobacteria bacterium	uncultured Acidobacteria bacterium	uncultured Acidobacteria bacterium	B3325_uncultured Acidobacteria bacterium	Not_predicted	Non-fer
df1f3f299b92a58c4aff24f3a651b8fc	54.319	0.137617	3.80304	0.000143316	0.000740039	-4.10695	Acidobacteria	Holophagae	Subgroup 7	#N/A	#N/A	B13417_o_Subgroup 7	Not_predicted	Non-fer
DQ829637.1.1462	17.0854	0.237306	2.75418	0.00588874	0.0210275	-3.65513	Acidobacteria	Acidobacteriia	Acidobacteriales	Koribacteraceae	Candidatus Koribacter	B1436_Candidatus Koribacter	Not_predicted	Non-fer
e5a3e85aef1660eba6140b51cddc390b	15.6874	0.51319	3.30492	0.000951549	0.00417405	-2.59562	Acidobacteria	Acidobacteriia	Subgroup 12	uncultured bacterium	uncultured bacterium	B1089_uncultured bacterium	Not_predicted	Non-fer
EF018110.1.1322	11.8093	0.784329	3.03563	0.0024031	0.00965683	-2.58794	Acidobacteria	Acidobacteriia	Solibacterales	Solibacteraceae (Subgroup 3)	Candidatus Solibacter	B630_Candidatus Solibacter	Not_predicted	Non-fer
EF018237.1.1349	50.374	0.178039	6.67904	2.46254e-11	3.83936e-10	0.177486	Acidobacteria	Acidobacteriia	Acidobacteriales	Acidobacteriaceae (Subgroup 1)	uncultured	B1708_uncultured	Not_predicted	Non-fer
EF019168.1.1329	13.3162	0.18495	2.68553	0.00724686	0.0251949	-3.42417	Acidobacteria	Acidobacteriia	Solibacterales	Solibacteraceae (Subgroup 3)	Candidatus Solibacter	B4692_Candidatus Solibacter	Not_predicted	Non-fer
EF019416.1.1347	14.606	0.704389	4.6644	3.11338e-06	2.25447e-05	1.66586	Acidobacteria	Acidobacteriia	Solibacterales	Solibacteraceae (Subgroup 3)	Candidatus Solibacter	B131_Candidatus Solibacter	Not_predicted	Non-fer
EF019631.1.1377	16.2251	0.295032	3.74466	0.000181101	0.000918636	-1.67733	Acidobacteria	Subgroup 22	uncultured Holophaga sp.	uncultured Holophaga sp.	uncultured Holophaga sp.	B1767_uncultured Holophaga sp.	Not_predicted	Non-fer
EF020026.1.1349	18.2964	0.394842	3.68424	0.000229937	0.00114258	-2.17463	Acidobacteria	Acidobacteriia	Acidobacteriales	uncultured	uncultured Acidobacteriaceae bacterium	B2018_uncultured Acidobacteriaceae bacterium	Not_predicted	Non-fer
EF020033.1.1350	16.5633	0.230021	2.78223	0.0054033	0.0194582	-3.57758	Acidobacteria	Acidobacteriia	Solibacterales	Solibacteraceae (Subgroup 3)	Candidatus Solibacter	B2682_Candidatus Solibacter	Not_predicted	Non-fer
EF061943.1.1516	16.8016	0.233358	3.42998	0.000604729	0.00275953	-2.49732	Acidobacteria	Subgroup 6	#N/A	#N/A	#N/A	B3693_o_NA	Not_predicted	Non-fer
EF111087.1.1301	16.5521	0.229892	3.37905	0.000728641	0.00327299	-2.56669	Acidobacteria	Subgroup 17	#N/A	#N/A	#N/A	B633_o_NA	Not_predicted	Non-fer
EF515983.1.1414	87.1478	0.220788	6.10149	1.0684e-09	1.31026e-08	-3.27916	Acidobacteria	Acidobacteriia	Solibacterales	Solibacteraceae (Subgroup 3)	Candidatus Solibacter	B1656_Candidatus Solibacter	Not_predicted	Non-fer
EF516015.1.1421	42.7515	0.185736	6.12665	9.12727e-10	1.13667e-08	-0.0953836	Acidobacteria	Acidobacteriia	Acidobacteriales	uncultured	uncultured forest soil bacterium	B7609_uncultured forest soil bacterium	Not_predicted	Non-fer
EU132113.1.1365	27.9402	1.83674	8.60153	8.38324e-18	3.02436e-16	17.2358	Acidobacteria	Holophagae	Subgroup 7	#N/A	#N/A	B85_o_Subgroup 7	Not_predicted	Non-fer
EU132200.1.1364	11.6932	1.41881	5.28686	1.25623e-07	1.15898e-06	5.38204	Acidobacteria	Holophagae	Subgroup 7	uncultured Desulfuromonadales bacterium	uncultured Desulfuromonadales bacterium	B209_uncultured Desulfuromonadales bacterium	Not_predicted	Non-fer
EU193006.1.1506	68.3036	0.186123	5.70951	1.14761e-08	1.23101e-07	-3.00913	Acidobacteria	Subgroup 17	uncultured Acidobacteriales bacterium	uncultured Acidobacteriales bacterium	uncultured Acidobacteriales bacterium	B4551_uncultured Acidobacteriales bacterium	Not_predicted	Non-fer
EU266820.1.1502	30.7385	0.40291	7.26194	3.94253e-13	8.00951e-12	7.52467	Acidobacteria	Holophagae	Holophagales	Holophagaceae	uncultured	B3215_uncultured	Not_predicted	Non-fer
f0622dc58e55fc3cb460188a912069e2	19.639	1.28097	8.3986	4.78811e-17	1.5852e-15	21.0064	Acidobacteria	Holophagae	Subgroup 7	uncultured Thermaerobacter sp.	uncultured Thermaerobacter sp.	B782_uncultured Thermaerobacter sp.	Not_predicted	Non-fer
FJ538114.1.1488	11.8121	0.330778	2.5013	0.012381	0.039432	-3.55874	Acidobacteria	Blastocatellia (Subgroup 4)	Blastocatellales	Blastocatellaceae	JGI 0001001-H03	B1099_JGI 0001001-H03	Not_predicted	Non-fer
FJ538138.1.1521	82.4316	0.62637	16.2819	2.94683e-59	4.74145e-56	46.1042	Acidobacteria	Subgroup 6	#N/A	#N/A	#N/A	B619_o_NA	Not_predicted	Non-fer
FJ936978.1.1475	51.2926	0.222844	7.35066	2.04109e-13	4.2762e-12	1.94462	Acidobacteria	Acidobacteriia	Acidobacteriales	#N/A	#N/A	B1506_o_Acidobacteriales	Not_predicted	Non-fer
FJ946602.1.1290	66.8168	0.182072	5.58523	2.36151e-08	2.43257e-07	-3.07971	Acidobacteria	Holophagae	Subgroup 7	uncultured bacterium gp7	uncultured bacterium gp7	B7190_uncultured bacterium gp7	Not_predicted	Non-fer
GQ390237.1.1464	12.7761	0.519739	2.68323	0.00729693	0.0253252	-3.37271	Acidobacteria	Holophagae	Holophagales	Holophagaceae	Geothrix	B1402_Geothrix	Not_predicted	Non-fer
GU208427.1.1456	6.28885	1.09294	2.75072	0.00595126	0.0211957	-2.4442	Acidobacteria	Thermoanaerobaculia	Thermoanaerobaculales	Thermoanaerobaculaceae	Thermoanaerobaculum	B1087_Thermoanaerobaculum	Not_predicted	Non-fer
GU359103.1.1429	13.2702	0.328603	3.67143	0.000241769	0.00119473	-1.2847	Acidobacteria	Acidobacteriia	Acidobacteriales	uncultured	#N/A	B897_f_uncultured	Not_predicted	Non-fer
HE653845.1.1447	14.5149	0.201594	2.66375	0.00773303	0.0266205	-3.56831	Acidobacteria	Subgroup 6	#N/A	#N/A	#N/A	B6045_o_NA	Not_predicted	Non-fer
HE974771.1.1516	23.1149	1.6659	10.466	1.42041e-25	1.03884e-23	36.651	Acidobacteria	Thermoanaerobaculia	Thermoanaerobaculales	Thermoanaerobaculaceae	Subgroup 10	B482_Subgroup 10	Not_predicted	Non-fer
HM061987.1.1431	14.6255	0.203136	2.94959	0.00318532	0.0124096	-3.13088	Acidobacteria	Acidobacteriia	Acidobacteriales	uncultured	uncultured Acidobacteria bacterium	B941_uncultured Acidobacteria bacterium	Not_predicted	Non-fer
HM062391.1.1418	77.3203	0.210693	6.46322	1.04646e-10	1.49269e-09	-2.54785	Acidobacteria	Acidobacteriia	Solibacterales	Solibacteraceae (Subgroup 3)	Candidatus Solibacter	B5264_Candidatus Solibacter	Not_predicted	Non-fer
HM185964.1.1386	15.8727	0.309075	2.98582	0.0028313	0.011193	-3.20803	Acidobacteria	Subgroup 17	#N/A	#N/A	#N/A	B2226_o_NA	Not_predicted	Non-fer
HM312883.1.1321	91.5544	0.34441	10.6796	1.47338e-26	1.18534e-24	5.50183	Acidobacteria	Acidobacteriia	Acidobacteriales	Acidobacteriaceae (Subgroup 1)	#N/A	B4576_f_Acidobacteriaceae (Subgroup 1)	Not_predicted	Non-fer
HM438148.1.1509	56.5353	0.245621	8.10199	5.68569e-16	1.67145e-14	3.38035	Acidobacteria	Subgroup 6	uncultured bacterium 126	uncultured bacterium 126	uncultured bacterium 126	B314_uncultured bacterium 126	Not_predicted	Non-fer
HQ118544.1.1498	65.72	0.232276	8.71373	3.14407e-18	1.21024e-16	3.61526	Acidobacteria	Subgroup 6	uncultured bacterium 213	uncultured bacterium 213	uncultured bacterium 213	B3751_uncultured bacterium 213	Not_predicted	Non-fer
HQ119153.1.1489	13.7933	0.383713	2.68747	0.00720489	0.0250714	-3.46782	Acidobacteria	Acidobacteriia	Acidobacteriales	uncultured	uncultured Acidobacteriaceae bacterium	B1189_uncultured Acidobacteriaceae bacterium	Not_predicted	Non-fer
HQ330559.1.1396	8.72951	0.511244	2.92811	0.00341384	0.013185	-2.354	Acidobacteria	Aminicenantia	Aminicenantales	#N/A	#N/A	B3597_o_Aminicenantales	Not_predicted	Non-fer
HQ343224.1.1465	41.7448	0.10576	2.92268	0.00347387	0.0133273	-4.32226	Acidobacteria	Acidobacteriia	Solibacterales	Solibacteraceae (Subgroup 3)	Elev-16S-1166	B17345_Elev-16S-1166	Not_predicted	Non-fer
HQ597068.1.1509	66.9538	0.490766	7.09029	1.37873e-12	2.60372e-11	-0.853582	Acidobacteria	Blastocatellia (Subgroup 4)	11-24	uncultured Acidobacteriales bacterium	uncultured Acidobacteriales bacterium	B608_uncultured Acidobacteriales bacterium	Not_predicted	Non-fer
HQ597109.1.1515	10.3322	0.346996	4.36954	1.25076e-05	8.02423e-05	1.80362	Acidobacteria	Blastocatellia (Subgroup 4)	Pyrinomonadales	Pyrinomonadaceae	RB41	B535_RB41	Not_predicted	Non-fer
HQ598813.1.1491	41.7448	0.10576	2.92268	0.00347387	0.0133273	-4.32226	Acidobacteria	Subgroup 15	uncultured Acidobacteria bacterium	uncultured Acidobacteria bacterium	uncultured Acidobacteria bacterium	B17347_uncultured Acidobacteria bacterium	Not_predicted	Non-fer
JF198827.1.1321	15.3385	1.17214	5.74484	9.32219e-09	1.01347e-07	6.23191	Acidobacteria	Acidobacteriia	Acidobacteriales	Koribacteraceae	Candidatus Koribacter	B310_Candidatus Koribacter	Not_predicted	Non-fer
JN254798.1.1514	60.214	0.152551	4.21577	2.49922e-05	0.000150948	-3.98661	Acidobacteria	Thermoanaerobaculia	Thermoanaerobaculales	Thermoanaerobaculaceae	Subgroup 10	B11549_Subgroup 10	Not_predicted	Non-fer
JN604664.1.1223	14.0001	0.194444	2.56928	0.0101975	0.0336201	-3.65486	Acidobacteria	Thermoanaerobaculia	Thermoanaerobaculales	Thermoanaerobaculaceae	Subgroup 10	B2702_Subgroup 10	Not_predicted	Non-fer
JN672133.1.1312	47.3867	0.120054	3.31769	0.000909134	0.00400766	-4.23263	Acidobacteria	Holophagae	Subgroup 7	#N/A	#N/A	B5523_o_Subgroup 7	Not_predicted	Non-fer
JQ825069.1.1511	15.1244	0.210062	3.03208	0.00243157	0.00975172	-3.04434	Acidobacteria	Subgroup 6	#N/A	#N/A	#N/A	B5312_o_NA	Not_predicted	Non-fer
JQ919768.1.1336	14.8356	0.206051	2.97419	0.00294084	0.0115523	-3.11238	Acidobacteria	Acidobacteriia	Solibacterales	Solibacteraceae (Subgroup 3)	Paludibaculum	B1241_Paludibaculum	Not_predicted	Non-fer
JX222562.1.1387	64.6277	0.176107	5.40225	6.64941e-08	6.39122e-07	-3.18079	Acidobacteria	Holophagae	Subgroup 7	uncultured soil bacterium	uncultured soil bacterium	B4300_uncultured soil bacterium	Not_predicted	Non-fer
JX505105.1.1478	15.2948	1.29165	3.62624	0.000288227	0.00140023	-1.80263	Acidobacteria	Holophagae	Subgroup 7	uncultured Desulfovirga sp.	uncultured Desulfovirga sp.	B151_uncultured Desulfovirga sp.	Not_predicted	Non-fer
KC541074.1.1551	13.6658	0.189803	2.98301	0.00285738	0.011285	-2.95382	Acidobacteria	Subgroup 17	#N/A	#N/A	#N/A	B3085_o_NA	Not_predicted	Non-fer
KC921176.1.1320	28.0831	0.122009	4.02455	5.72743e-05	0.000321319	-2.7342	Acidobacteria	Acidobacteriia	Solibacterales	Solibacteraceae (Subgroup 3)	Elev-16S-1166	B12450_Elev-16S-1166	Not_predicted	Non-fer
KF956765.1.1423	29.1041	0.791933	10.7334	8.26445e-27	6.99868e-25	34.2939	Acidobacteria	Acidobacteriia	Solibacterales	Solibacteraceae (Subgroup 3)	AKIW659	B699_AKIW659	Not_predicted	Non-fer
KF956782.1.1473	11.6968	0.34628	2.90737	0.00364845	0.0139571	-2.83781	Acidobacteria	Acidobacteriia	Subgroup 13	uncultured Solibacterales bacterium	uncultured Solibacterales bacterium	B3528_uncultured Solibacterales bacterium	Not_predicted	Non-fer
KM205513.1.1426	73.5733	0.584816	11.1498	8.57193e-29	8.20966e-27	11.9517	Acidobacteria	Acidobacteriia	Solibacterales	Solibacteraceae (Subgroup 3)	GOUTB8	B164_GOUTB8	Not_predicted	Non-fer
KX504885.1.1527	50.2706	0.12736	3.5196	0.000433067	0.00203863	-4.18243	Acidobacteria	Thermoanaerobaculia	Thermoanaerobaculales	Thermoanaerobaculaceae	TPD-58	B4604_TPD-58	Not_predicted	Non-fer
KY287412.1.1366	11.2293	3.34537	3.84536	0.000120714	0.000631205	-0.300479	Acidobacteria	Subgroup 6	#N/A	#N/A	#N/A	B74_o_NA	Not_predicted	Non-fer
LC124606.1.1478	9.42576	5.34114	4.89263	1.00202e-06	7.89544e-06	4.28526	Acidobacteria	Holophagae	Subgroup 7	uncultured Acidobacteriales bacterium	uncultured Acidobacteriales bacterium	B92_uncultured Acidobacteriales bacterium	Not_predicted	Non-fer
LC124611.1.1460	35.5054	0.592116	8.05594	8.28497e-16	2.38045e-14	9.76043	Acidobacteria	Holophagae	Holophagales	Holophagaceae	#N/A	B3333_f_Holophagaceae	Not_predicted	Non-fer
LN555032.1.1217	16.8692	0.712506	3.53005	0.000416324	0.00196557	-2.2937	Acidobacteria	Subgroup 6	#N/A	#N/A	#N/A	B1202_o_NA	Not_predicted	Non-fer
24a350ec539847f486eae99de5584a6c	16.8448	0.432145	5.93088	3.05819e-09	3.52987e-08	6.55097	Actinobacteria	Coriobacteriia	OPB41	uncultured soil bacterium	uncultured soil bacterium	B3035_uncultured soil bacterium	Not_predicted	Non-fer
3c83e57675994e79f249847ced4eea9b	11.9084	0.165394	2.5994	0.00934479	0.0311945	-3.417	Actinobacteria	MB-A2-108	#N/A	#N/A	#N/A	B9918_o_NA	Not_predicted	Non-fer
452eba4023fe3a8bb4ef2ee258f61006	12.2995	0.170826	2.68478	0.00726328	0.0252302	-3.31943	Actinobacteria	Coriobacteriia	OPB41	uncultured soil bacterium	uncultured soil bacterium	B9280_uncultured soil bacterium	Not_predicted	Non-fer
4ea84573b3e97ecec33dfc1c24520e18	13.6729	0.350998	2.8952	0.00379287	0.0144546	-3.11482	Actinobacteria	Coriobacteriia	#N/A	#N/A	#N/A	B4246_o_NA	Not_predicted	Non-fer
59a8b2553dd8dd353a1226192d190837	12.8525	0.178507	2.43843	0.0147592	0.0458243	-3.73607	Actinobacteria	Coriobacteriia	OPB41	#N/A	#N/A	B8375_o_OPB41	Not_predicted	Non-fer
883866e1f8a52831d6b5c9c3547e8519	54.5641	0.192848	7.23459	4.82237e-13	9.65073e-12	1.02594	Actinobacteria	Actinobacteria	Propionibacteriales	Nocardioidaceae	Nocardioides	B6848_Nocardioides	Not_predicted	Non-fer
a93aeea6b1cb3e784dd79e36b169d7c2	28.0162	0.990475	4.85993	1.18237e-06	9.24407e-06	-0.953669	Actinobacteria	MB-A2-108	uncultured Streptomyces sp.	uncultured Streptomyces sp.	uncultured Streptomyces sp.	B1041_uncultured Streptomyces sp.	Not_predicted	Non-fer
AB047507.1.1471	38.5653	0.136303	5.11333	3.19187e-07	2.75522e-06	-1.84914	Actinobacteria	Actinobacteria	Micromonosporales	Micromonosporaceae	Actinoplanes	B1183_Actinoplanes	Not_predicted	Non-fer
AB374384.1.1507	63.6907	0.173554	5.32392	1.02551e-07	9.60443e-07	-3.22303	Actinobacteria	Actinobacteria	Propionibacteriales	Nocardioidaceae	Nocardioides	B3681_Nocardioides	Not_predicted	Non-fer
AB487081.1.1362	16.8247	1.04564	3.71418	0.000204367	0.00102694	-1.86139	Actinobacteria	Thermoleophilia	Gaiellales	Gaiellaceae	Gaiella	B97_Gaiella	Not_predicted	Non-fer
AB512285.1.1478	13.1092	0.182072	2.48712	0.0128856	0.0407167	-3.69225	Actinobacteria	Actinobacteria	Kineosporiales	Kineosporiaceae	Angustibacter	B2711_Angustibacter	Not_predicted	Non-fer
AB602506.1.1504	24.5259	0.381801	5.71284	1.12541e-08	1.21203e-07	2.67549	Actinobacteria	Thermoleophilia	Gaiellales	uncultured	uncultured Rubrobacteraceae bacterium	B1588_uncultured Rubrobacteraceae bacterium	Not_predicted	Non-fer
AB630582.1.1469	39.5168	0.297618	5.04861	4.48573e-07	3.78675e-06	-2.07209	Actinobacteria	Thermoleophilia	Solirubrobacterales	67-14	metagenome	B5690_metagenome	Not_predicted	Non-fer
AB672314.1.1440	9.87048	2.27248	4.30213	1.69893e-05	0.000106365	1.67009	Actinobacteria	MB-A2-108	#N/A	#N/A	#N/A	B244_o_NA	Not_predicted	Non-fer
AB696289.1.1407	6.8556	1.03554	3.04426	0.00233532	0.00942683	-1.78876	Actinobacteria	Acidimicrobiia	uncultured	#N/A	#N/A	B1624_o_uncultured	Not_predicted	Non-fer
AB818622.1.1410	73.9151	0.187263	5.17502	2.29884e-07	2.03232e-06	-3.65905	Actinobacteria	Thermoleophilia	Gaiellales	uncultured	#N/A	B7420_f_uncultured	Not_predicted	Non-fer
AF050572.1.1477	33.4571	0.160593	3.70153	0.000214827	0.0010728	-3.56262	Actinobacteria	WCHB1-81	uncultured eubacterium WCHB1-81	uncultured eubacterium WCHB1-81	uncultured eubacterium WCHB1-81	B15120_uncultured eubacterium WCHB1-81	Not_predicted	Non-fer
AM489698.1.1454	13.0155	0.180772	2.6093	0.0090789	0.0303573	-3.51107	Actinobacteria	Actinobacteria	Micromonosporales	Micromonosporaceae	#N/A	B8148_f_Micromonosporaceae	Not_predicted	Non-fer
AP010968.1710936.1712460	50.3992	0.218962	7.22264	5.26479e-13	1.04323e-11	1.71389	Actinobacteria	Actinobacteria	Streptomycetales	Streptomycetaceae	Kitasatospora	B4617_Kitasatospora	Not_predicted	Non-fer
AY921917.1.1380	12.6887	1.2451	4.36413	1.28211e-05	8.21225e-05	1.10459	Actinobacteria	Acidimicrobiia	Microtrichales	Ilumatobacteraceae	uncultured	B1106_uncultured	Not_predicted	Non-fer
b501c1a86f02ffe505c4833f75bdaf6a	78.831	0.199717	5.5192	3.44386e-08	3.48501e-07	-3.52521	Actinobacteria	Actinobacteria	#N/A	#N/A	#N/A	B6217_o_NA	Not_predicted	Non-fer
CP001683.767227.768753	56.2387	0.14248	3.93744	8.26074e-05	0.000446024	-4.06912	Actinobacteria	Actinobacteria	Pseudonocardiales	Pseudonocardiaceae	Saccharomonospora	B12809_Saccharomonospora	Not_predicted	Non-fer
CU925479.1.1369	13.1699	0.182916	2.49864	0.0124742	0.0396659	-3.68175	Actinobacteria	Thermoleophilia	Gaiellales	uncultured	#N/A	B969_f_uncultured	Not_predicted	Non-fer
DQ125664.1.1451	13.0124	5.84274	6.5827	4.72373e-11	7.1299e-10	12.0041	Actinobacteria	Actinobacteria	Micrococcales	Micrococcaceae	#N/A	B150_f_Micrococcaceae	Not_predicted	Non-fer
DQ125808.1.1473	13.7408	0.190843	2.5217	0.0116859	0.0375206	-3.69728	Actinobacteria	Thermoleophilia	Gaiellales	Gaiellaceae	Gaiella	B3771_Gaiella	Not_predicted	Non-fer
e22fd387f4f838a609f00dbec13d988d	56.7578	0.450583	4.96481	6.92832e-07	5.63014e-06	-3.30858	Actinobacteria	Thermoleophilia	Gaiellales	uncultured	#N/A	B3036_f_uncultured	Not_predicted	Non-fer
EF019272.1.1358	18.3465	1.37456	6.20626	5.52286e-10	7.17794e-09	7.3404	Actinobacteria	Actinobacteria	Frankiales	uncultured	#N/A	B238_f_uncultured	Not_predicted	Non-fer
EF019917.1.1358	50.9164	0.128996	3.56481	0.000364889	0.00174422	-4.17078	Actinobacteria	Acidimicrobiia	IMCC26256	uncultured Acidothermaceae bacterium	uncultured Acidothermaceae bacterium	B8521_uncultured Acidothermaceae bacterium	Not_predicted	Non-fer
EU132728.1.1294	44.8452	0.453757	11.0638	2.23266e-28	2.11315e-26	25.2617	Actinobacteria	Acidimicrobiia	Microtrichales	Ilumatobacteraceae	CL500-29 marine group	B4257_CL500-29 marine group	Not_predicted	Non-fer
EU132738.1.1316	12.8422	0.3593	2.69685	0.00700516	0.0244922	-3.35768	Actinobacteria	MB-A2-108	metagenome	metagenome	metagenome	B1471_metagenome	Not_predicted	Non-fer
EU132743.1.1303	56.1127	0.198321	7.43992	1.0444e-13	2.25866e-12	1.35666	Actinobacteria	Actinobacteria	Corynebacteriales	Mycobacteriaceae	Mycobacterium	B6358_Mycobacterium	Not_predicted	Non-fer
EU132858.1.1239	12.0886	0.1679	2.43795	0.0147785	0.0458243	-3.6742	Actinobacteria	Actinobacteria	Micromonosporales	Micromonosporaceae	#N/A	B9638_f_Micromonosporaceae	Not_predicted	Non-fer
EU133157.1.1353	70.0358	0.190843	5.8543	4.85815e-09	5.43585e-08	-2.92495	Actinobacteria	Actinobacteria	Micromonosporales	Micromonosporaceae	#N/A	B2986_f_Micromonosporaceae	Not_predicted	Non-fer
EU375215.1.1208	68.5038	0.173554	4.79616	1.62793e-06	1.24022e-05	-3.79641	Actinobacteria	Actinobacteria	Propionibacteriales	Nocardioidaceae	Aeromicrobium	B8970_Aeromicrobium	Not_predicted	Non-fer
f0aeff0c8b10a931bf2c1ef505074e9e	13.0911	0.327351	2.81993	0.00480767	0.0175808	-3.17865	Actinobacteria	Thermoleophilia	Gaiellales	uncultured	uncultured Conexibacteraceae bacterium	B3997_uncultured Conexibacteraceae bacterium	Not_predicted	Non-fer
ffd400e7ace7f151a7fe56d4d5452a38	14.5522	0.202115	2.7609	0.00576895	0.0206639	-3.4297	Actinobacteria	Acidimicrobiia	IMCC26256	uncultured organism	uncultured organism	B3930_uncultured organism	Not_predicted	Non-fer
FJ595568.1.1337	14.1537	0.196578	2.59748	0.0093974	0.0313571	-3.62936	Actinobacteria	Actinobacteria	Frankiales	uncultured	#N/A	B6522_f_uncultured	Not_predicted	Non-fer
FJ810555.1.1478	9.84997	1.03101	3.60024	0.000318621	0.00153583	-0.751563	Actinobacteria	Actinobacteria	Frankiales	Sporichthyaceae	#N/A	B2434_f_Sporichthyaceae	Not_predicted	Non-fer
FPLM01006560.16.1520	6.84539	0.450106	2.59559	0.00944911	0.0315166	-2.84425	Actinobacteria	Acidimicrobiia	Microtrichales	Ilumatobacteraceae	uncultured	B2576_uncultured	Not_predicted	Non-fer
FPLS01009478.18.1542	12.3399	0.171387	2.69358	0.00707417	0.0246905	-3.30918	Actinobacteria	Thermoleophilia	Solirubrobacterales	67-14	#N/A	B8353_f_67-14	Not_predicted	Non-fer
FPLS01015572.10.1517	20.6082	0.316498	3.302	0.000961505	0.00420626	-3.17987	Actinobacteria	Thermoleophilia	Solirubrobacterales	Solirubrobacteraceae	Conexibacter	B3430_Conexibacter	Not_predicted	Non-fer
FPLS01034797.35.1540	11.1409	0.882421	2.48019	0.0131385	0.0414344	-3.52679	Actinobacteria	Thermoleophilia	Solirubrobacterales	Solirubrobacteraceae	Conexibacter	B719_Conexibacter	Not_predicted	Non-fer
FQ658816.1.1360	67.2029	0.170258	4.70508	2.55302e-06	1.87229e-05	-3.82788	Actinobacteria	Thermoleophilia	Solirubrobacterales	67-14	uncultured soil bacterium	B8643_uncultured soil bacterium	Not_predicted	Non-fer
GQ044204.1.1368	13.1699	0.182916	2.49864	0.0124742	0.0396659	-3.68175	Actinobacteria	Thermoleophilia	Gaiellales	uncultured	#N/A	B2406_f_uncultured	Not_predicted	Non-fer
GQ396962.1.1478	92.2491	0.233712	6.45864	1.07854e-10	1.53031e-09	-3.11604	Actinobacteria	Coriobacteriia	OPB41	#N/A	#N/A	B2186_o_OPB41	Not_predicted	Non-fer
GQ397061.1.1516	85.7748	0.582844	12.6629	1.27426e-36	3.01513e-34	15.9844	Actinobacteria	Thermoleophilia	Gaiellales	Gaiellaceae	Gaiella	B2839_Gaiella	Not_predicted	Non-fer
GQ495433.1.1251	13.4559	0.186887	2.93719	0.00331547	0.0128359	-3.0125	Actinobacteria	Actinobacteria	Frankiales	Frankiaceae	Jatrophihabitans	B959_Jatrophihabitans	Not_predicted	Non-fer
HE804536.1.1436	12.5189	0.79292	4.44901	8.66881e-06	5.73194e-05	1.47272	Actinobacteria	Coriobacteriia	OPB41	#N/A	#N/A	B823_o_OPB41	Not_predicted	Non-fer
HM237112.1.1247	34.7558	0.0880535	2.43336	0.0149672	0.0463299	-4.41756	Actinobacteria	Acidimicrobiia	Microtrichales	Microtrichaceae	uncultured	B12435_uncultured	Not_predicted	Non-fer
HM248231.1.1366	15.9681	0.320153	2.91417	0.00356992	0.0136632	-3.33255	Actinobacteria	Thermoleophilia	Solirubrobacterales	Solirubrobacteraceae	Solirubrobacter	B6473_Solirubrobacter	Not_predicted	Non-fer
HM263196.1.1366	37.1621	0.973369	9.95705	2.63176e-23	1.51232e-21	21.5227	Actinobacteria	Thermoleophilia	Solirubrobacterales	Solirubrobacteraceae	Conexibacter	B57_Conexibacter	Not_predicted	Non-fer
HM263289.1.1366	12.9835	0.180329	2.61843	0.00883951	0.0296308	-3.49432	Actinobacteria	Thermoleophilia	Solirubrobacterales	Solirubrobacteraceae	Solirubrobacter	B3561_Solirubrobacter	Not_predicted	Non-fer
HM269900.1.1337	15.653	0.430141	3.78296	0.000155384	0.000797237	-1.46846	Actinobacteria	Actinobacteria	Corynebacteriales	Mycobacteriaceae	Mycobacterium	B753_Mycobacterium	Not_predicted	Non-fer
HM270648.1.1367	36.8621	1.50696	8.40487	4.53984e-17	1.50922e-15	11.1411	Actinobacteria	Thermoleophilia	Gaiellales	Gaiellaceae	Gaiella	B341_Gaiella	Not_predicted	Non-fer
HM278046.1.1333	66.6882	1.10579	11.425	3.81403e-30	4.44694e-28	16.0677	Actinobacteria	Actinobacteria	Frankiales	Nakamurellaceae	Nakamurella	B1190_Nakamurella	Not_predicted	Non-fer
HM297893.1.1347	6.23617	5.46833	2.75122	0.00594224	0.0211809	-2.43764	Actinobacteria	Actinobacteria	Micrococcales	Intrasporangiaceae	#N/A	B59_f_Intrasporangiaceae	Not_predicted	Non-fer
HM318821.1.1366	11.8614	0.164743	2.42145	0.0154667	0.0476559	-3.67774	Actinobacteria	Thermoleophilia	Gaiellales	uncultured	#N/A	B3350_f_uncultured	Not_predicted	Non-fer
HQ183929.1.1510	13.2875	0.184552	2.67974	0.00737337	0.0255464	-3.43029	Actinobacteria	Thermoleophilia	Gaiellales	uncultured	uncultured soil bacterium	B4348_uncultured soil bacterium	Not_predicted	Non-fer
JF168212.1.1341	16.6529	0.23129	3.15944	0.00158288	0.0065776	-2.99857	Actinobacteria	Actinobacteria	Frankiales	Frankiaceae	Jatrophihabitans	B2879_Jatrophihabitans	Not_predicted	Non-fer
JF222366.1.1366	25.3087	0.520307	6.04647	1.5044e-09	1.79982e-08	3.80594	Actinobacteria	Thermoleophilia	Solirubrobacterales	67-14	#N/A	B4588_f_67-14	Not_predicted	Non-fer
JF342354.1.1491	16.8947	0.926225	3.62057	0.00029461	0.00143038	-2.09438	Actinobacteria	Actinobacteria	Micrococcales	Intrasporangiaceae	#N/A	B18_f_Intrasporangiaceae	Not_predicted	Non-fer
JF706671.1.1509	54.0935	0.191185	7.1722	7.61382e-13	1.47955e-11	0.927275	Actinobacteria	Thermoleophilia	Solirubrobacterales	67-14	uncultured organism	B7038_uncultured organism	Not_predicted	Non-fer
JN545848.1.1275	14.8034	0.20558	2.4866	0.0129045	0.0407604	-3.81981	Actinobacteria	Actinobacteria	Micromonosporales	Micromonosporaceae	Micromonospora	B5694_Micromonospora	Not_predicted	Non-fer
JN626516.1.1334	10.9263	0.327758	2.6816	0.00733247	0.0254157	-3.16799	Actinobacteria	Actinobacteria	Frankiales	Sporichthyaceae	#N/A	B4827_f_Sporichthyaceae	Not_predicted	Non-fer
JPRS01000598.3975.5519	14.2994	0.198604	2.86669	0.00415181	0.0155919	-3.23525	Actinobacteria	Actinobacteria	Micrococcales	Microbacteriaceae	Cryobacterium	B1942_Cryobacterium	Not_predicted	Non-fer
JQ619872.1.1374	71.8098	0.195678	6.00259	1.97229e-09	2.3334e-08	-2.83655	Actinobacteria	Actinobacteria	Streptomycetales	Streptomycetaceae	Streptomyces	B6609_Streptomyces	Not_predicted	Non-fer
JX079211.1.1500	7.08206	0.504087	2.52675	0.0115192	0.0370978	-3.00949	Actinobacteria	Thermoleophilia	Gaiellales	uncultured	uncultured prokaryote	B1369_uncultured prokaryote	Not_predicted	Non-fer
JX098355.1.1340	15.2882	0.440174	3.11604	0.00183534	0.00752939	-2.91148	Actinobacteria	Actinobacteria	Frankiales	Frankiaceae	Jatrophihabitans	B561_Jatrophihabitans	Not_predicted	Non-fer
JX098395.1.1331	62.501	0.158346	4.37589	1.21495e-05	7.80073e-05	-3.93658	Actinobacteria	Actinobacteria	Frankiales	uncultured	#N/A	B10843_f_uncultured	Not_predicted	Non-fer
JX114409.1.1481	46.7386	0.12736	3.90689	9.37712e-05	0.000500922	-3.88068	Actinobacteria	Acidimicrobiia	Microtrichales	Microtrichaceae	uncultured	B12062_uncultured	Not_predicted	Non-fer
JX122149.1.1213	22.1186	0.0960953	3.16978	0.00152765	0.00637775	-3.49468	Actinobacteria	Actinobacteria	Corynebacteriales	Nocardiaceae	Nocardia	B18406_Nocardia	Not_predicted	Non-fer
JX504941.1.1442	86.0196	0.366606	8.06864	7.46919e-16	2.1693e-14	-0.644017	Actinobacteria	MB-A2-108	uncultured Catenulispora sp.	uncultured Catenulispora sp.	uncultured Catenulispora sp.	B1502_uncultured Catenulispora sp.	Not_predicted	Non-fer
JX505325.1.1441	30.1939	0.601973	5.23785	1.6395e-07	1.48869e-06	-0.333377	Actinobacteria	Acidimicrobiia	IMCC26256	uncultured Ferrimicrobium sp.	uncultured Ferrimicrobium sp.	B1280_uncultured Ferrimicrobium sp.	Not_predicted	Non-fer
KC358412.1.1276	57.8241	0.157567	4.83353	1.35039e-06	1.04561e-05	-3.47347	Actinobacteria	Thermoleophilia	Gaiellales	Gaiellaceae	Gaiella	B1456_Gaiella	Not_predicted	Non-fer
KC462534.1.1390	59.1995	0.161315	4.9485	7.53387e-07	6.03685e-06	-3.41693	Actinobacteria	Actinobacteria	Streptosporangiales	Thermomonosporaceae	Actinomadura	B10513_Actinomadura	Not_predicted	Non-fer
KC554089.1.1514	12.175	0.169096	2.65758	0.00787596	0.0270086	-3.35085	Actinobacteria	Actinobacteria	Micromonosporales	Micromonosporaceae	#N/A	B5384_f_Micromonosporaceae	Not_predicted	Non-fer
KC554195.1.1510	65.7855	0.166667	4.60584	4.13099e-06	2.91269e-05	-3.86148	Actinobacteria	Acidimicrobiia	IMCC26256	uncultured Ferrimicrobium sp.	uncultured Ferrimicrobium sp.	B9822_uncultured Ferrimicrobium sp.	Not_predicted	Non-fer
KC554774.1.1519	46.1127	0.125654	3.85457	0.000116263	0.00060894	-3.9011	Actinobacteria	Thermoleophilia	Solirubrobacterales	67-14	uncultured Rubrobacteria bacterium	B14994_uncultured Rubrobacteria bacterium	Not_predicted	Non-fer
KC554952.1.1515	11.6411	0.50156	4.2337	2.30811e-05	0.000140886	0.922755	Actinobacteria	Actinobacteria	Micromonosporales	Micromonosporaceae	Dactylosporangium	B2470_Dactylosporangium	Not_predicted	Non-fer
KC554994.1.1513	61.3914	0.167288	5.13172	2.89551e-07	2.51287e-06	-3.32407	Actinobacteria	MB-A2-108	metagenome	metagenome	metagenome	B1889_metagenome	Not_predicted	Non-fer
KF515255.1.1509	15.1261	0.210062	2.54081	0.0110663	0.0358986	-3.77743	Actinobacteria	Thermoleophilia	Gaiellales	uncultured	#N/A	B1983_f_uncultured	Not_predicted	Non-fer
KF697448.1.1227	9.68872	0.686904	4.1036	4.08239e-05	0.000235771	0.972461	Actinobacteria	Acidimicrobiia	Microtrichales	Microtrichaceae	IMCC26207	B4936_IMCC26207	Not_predicted	Non-fer
KP054234.1.1441	56.9895	0.208107	3.44828	0.000565219	0.00259839	-4.29459	Actinobacteria	Actinobacteria	Micrococcales	Dermatophilaceae	#N/A	B14203_f_Dermatophilaceae	Not_predicted	Non-fer
KP204870.1.1216	10.1658	8.19687	5.78348	7.41626e-09	8.16194e-08	8.51184	Actinobacteria	Actinobacteria	Micrococcales	Micrococcaceae	#N/A	B7_f_Micrococcaceae	Not_predicted	Non-fer
KU362288.1.1316	10.7106	6.11725	5.24617	1.56734e-07	1.428e-06	5.53367	Actinobacteria	Actinobacteria	Micrococcales	Micrococcaceae	#N/A	B185_f_Micrococcaceae	Not_predicted	Non-fer
KY266810.1.1272	14.279	0.198321	2.915	0.00356052	0.0136402	-3.15092	Actinobacteria	Actinobacteria	Micromonosporales	Micromonosporaceae	Micromonospora	B6371_Micromonospora	Not_predicted	Non-fer
LN573436.1.1354	46.2341	0.163407	6.13013	8.93011e-10	1.11384e-08	-0.594273	Actinobacteria	MB-A2-108	metagenome	metagenome	metagenome	B5979_metagenome	Not_predicted	Non-fer
04a190f606ebee5aff83184cabf045ba	35.0485	0.123873	4.64704	3.38679e-06	2.41978e-05	-2.34869	Armatimonadetes	Fimbriimonadia	Fimbriimonadales	#N/A	#N/A	B6200_o_Fimbriimonadales	Not_predicted	Non-fer
1bf2d5d79c45657703aab4b422f741a8	76.9952	0.291189	6.00705	1.919e-09	2.27368e-08	-3.04039	Armatimonadetes	uncultured	#N/A	#N/A	#N/A	B6811_o_NA	Not_predicted	Non-fer
28e880ad836c80933afb024e01679a23	52.0386	0.319468	4.50222	6.75927e-06	4.55811e-05	-3.5677	Armatimonadetes	Chthonomonadetes	Chthonomonadales	uncultured bacterium SJA-22	uncultured bacterium SJA-22	B2314_uncultured bacterium SJA-22	Not_predicted	Non-fer
5c028334675383d6a46e51efcaf4be0d	106.846	0.283392	5.71146	1.13451e-08	1.22021e-07	-3.90438	Armatimonadetes	uncultured	uncultured bacterium SJA-121	uncultured bacterium SJA-121	uncultured bacterium SJA-121	B8835_uncultured bacterium SJA-121	Not_predicted	Non-fer
5fa8af4f8409426a2c2c4992e46928d5	61.1017	0.32037	4.00202	6.30088e-05	0.000352507	-4.11395	Armatimonadetes	Chthonomonadetes	Chthonomonadales	#N/A	#N/A	B3701_o_Chthonomonadales	Not_predicted	Non-fer
6060bde758aa8f4600fdb1758cda19d4	7.72812	0.243469	2.75043	0.00595656	0.0212038	-2.61613	Armatimonadetes	DG-56	uncultured bacterium	uncultured bacterium	uncultured bacterium	B2540_uncultured bacterium	Not_predicted	Non-fer
80104468843716f3f757d8988ad2b7dd	13.2394	0.30793	3.1451	0.0016625	0.00686944	-2.57005	Armatimonadetes	Chthonomonadetes	Chthonomonadales	Chthonomonadaceae	Chthonomonas	B1839_Chthonomonas	Not_predicted	Non-fer
825603517a9d119fcb3b76df30aed13f	51.6595	0.376729	7.70783	1.33375e-14	3.30154e-13	3.05439	Armatimonadetes	Fimbriimonadia	Fimbriimonadales	Fimbriimonadaceae	#N/A	B4340_f_Fimbriimonadaceae	Not_predicted	Non-fer
9dee0c7c863cecf86046d271891c236b	41.7448	0.10576	2.92268	0.00347387	0.0133273	-4.32226	Armatimonadetes	uncultured	uncultured soil bacterium	uncultured soil bacterium	uncultured soil bacterium	B17200_uncultured soil bacterium	Not_predicted	Non-fer
AY661983.1.1502	20.2242	0.219636	3.93629	8.30062e-05	0.000447877	-1.90842	Armatimonadetes	Armatimonadia	Armatimonadales	#N/A	#N/A	B11622_o_Armatimonadales	Not_predicted	Non-fer
cdb58d11c1c3cdd33dede8dff027a17e	55.6529	0.151651	4.65203	3.30589e-06	2.37252e-05	-3.56003	Armatimonadetes	Chthonomonadetes	Chthonomonadales	uncultured Lutispora sp.	uncultured Lutispora sp.	B7734_uncultured Lutispora sp.	Not_predicted	Non-fer
CU925892.1.1338	50.1749	0.39805	5.88145	4.12577e-09	4.67491e-08	-1.5774	Armatimonadetes	uncultured	uncultured bacterium SJA-176	uncultured bacterium SJA-176	uncultured bacterium SJA-176	B3629_uncultured bacterium SJA-176	Not_predicted	Non-fer
FM866305.1.1466	8.06565	1.39373	2.64279	0.0082284	0.0279089	-2.88779	Armatimonadetes	Chthonomonadetes	Chthonomonadales	uncultured bacterium	uncultured bacterium	B534_uncultured bacterium	Not_predicted	Non-fer
HQ114053.1.1470	58.3882	0.177564	2.87231	0.00407867	0.0153979	-4.46035	Armatimonadetes	Fimbriimonadia	Fimbriimonadales	Fimbriimonadaceae	#N/A	B5790_f_Fimbriimonadaceae	Not_predicted	Non-fer
HQ118378.1.1473	47.72	0.464203	8.3821	5.50676e-17	1.7936e-15	6.81475	Armatimonadetes	Fimbriimonadia	Fimbriimonadales	Fimbriimonadaceae	#N/A	B4310_f_Fimbriimonadaceae	Not_predicted	Non-fer
JX222430.1.1361	11.8615	0.164743	2.58916	0.00962727	0.0320444	-3.42849	Armatimonadetes	Chthonomonadetes	Chthonomonadales	uncultured Lutispora sp.	uncultured Lutispora sp.	B10079_uncultured Lutispora sp.	Not_predicted	Non-fer
JX843670.1.1486	60.214	0.152551	4.21577	2.49922e-05	0.000150948	-3.98661	Armatimonadetes	#N/A	#N/A	#N/A	#N/A	B3945_o_NA	Not_predicted	Non-fer
KC001850.1.1343	11.43	0.337493	2.64867	0.00808663	0.0275315	-3.28416	Armatimonadetes	Chthonomonadetes	Chthonomonadales	Chthonomonadaceae	Chthonomonas	B2091_Chthonomonas	Not_predicted	Non-fer
KM016313.1.1431	23.8488	0.251611	3.06942	0.00214733	0.00872047	-3.72575	Armatimonadetes	Fimbriimonadia	Fimbriimonadales	Fimbriimonadaceae	uncultured bacterium	B5666_uncultured bacterium	Not_predicted	Non-fer
LC124754.1.1449	37.6118	0.163407	5.3901	7.11439e-08	6.79754e-07	-1.14438	Armatimonadetes	uncultured	#N/A	#N/A	#N/A	B6048_o_NA	Not_predicted	Non-fer
029cd31e20993937939d2bb88ed13baa	43.857	0.111111	3.07056	0.00213917	0.00870052	-4.29003	Bacteroidetes	Bacteroidia	Chitinophagales	Saprospiraceae	uncultured	B16478_uncultured	Not_predicted	Non-fer
1b3ffda6eaeb449802f4cc1efd0e01d0	44.8159	0.113541	3.1377	0.00170503	0.00703073	-4.27488	Bacteroidetes	Bacteroidia	Sphingobacteriales	Lentimicrobiaceae	#N/A	B9996_f_Lentimicrobiaceae	Not_predicted	Non-fer
2e1a7159e049effc93ca553350a3893a	14.886	0.206748	2.73186	0.0063028	0.0222982	-3.50397	Bacteroidetes	Bacteroidia	Chitinophagales	Chitinophagaceae	Terrimonas	B5593_Terrimonas	Not_predicted	Non-fer
4343c149d0daae66849a8f9f241cdb6a	63.098	0.159858	4.41768	1.0024e-05	6.54039e-05	-3.92322	Bacteroidetes	Bacteroidia	#N/A	#N/A	#N/A	B9007_o_NA	Not_predicted	Non-fer
4a460e2ff912da5df06f9703ece59b9e	37.93	0.0960953	2.6556	0.00792246	0.0270527	-4.37644	Bacteroidetes	Ignavibacteria	Kryptoniales	MSB-3C8	uncultured bacterium	B13038_uncultured bacterium	Not_predicted	Non-fer
60967b2e897def3617676b8a18ba50a4	26.7142	0.259932	4.69281	2.71102e-06	1.98094e-05	-1.15611	Bacteroidetes	Ignavibacteria	Kryptoniales	BSV26	uncultured bacterium	B1100_uncultured bacterium	Not_predicted	Non-fer
753a99e983f3535a0de88a7b884da2cd	18.8586	0.6552	4.02549	5.70461e-05	0.000320262	-1.45266	Bacteroidetes	Bacteroidia	Bacteroidales	SB-5	#N/A	B2686_f_SB-5	Not_predicted	Non-fer
8a59d11e5eff6dfe3c2ab801ee99205b	31.4376	0.111111	4.16828	3.08077e-05	0.000181973	-2.81194	Bacteroidetes	Bacteroidia	Bacteroidales	Paludibacteraceae	Paludibacter	B16623_Paludibacter	Not_predicted	Non-fer
8ab19184b25b05aec7a8be09c7792ca5	43.3981	0.203637	3.7509	0.000176649	0.000898887	-3.90054	Bacteroidetes	Bacteroidia	Sphingobacteriales	env.OPS 17	uncultured bacterium	B5988_uncultured bacterium	Not_predicted	Non-fer
8c80838e1cf1f6687df935fae4ee74bb	42.8361	0.108525	2.99909	0.00271093	0.0107436	-4.30581	Bacteroidetes	Ignavibacteria	Ignavibacteriales	BSV40	uncultured bacterium	B13721_uncultured bacterium	Not_predicted	Non-fer
98141b701cd34f3f2d9346186a6c7e68	11.7087	0.282775	3.16242	0.00156675	0.00652069	-2.28872	Bacteroidetes	Bacteroidia	Bacteroidales	Bacteroidetes vadinHA17	uncultured Cytophagales bacterium	B2832_uncultured Cytophagales bacterium	Not_predicted	Non-fer
9d47f59e5165b1c1c887259686dfd2f4	5.6521	1.11268	2.41115	0.0159105	0.0488176	-3.11339	Bacteroidetes	Ignavibacteria	Kryptoniales	BSV26	Ignavibacteria bacterium RIFCSPLOWO2_12_FULL_56_21	B1637_Ignavibacteria bacterium RIFCSPLOWO2_12_FULL_56_21	Not_predicted	Non-fer
AB240229.1.1485	11.0996	0.358759	2.5033	0.0123113	0.0392878	-3.48701	Bacteroidetes	Bacteroidia	Chitinophagales	Chitinophagaceae	Flavisolibacter	B1871_Flavisolibacter	Not_predicted	Non-fer
AB240491.1.1488	7.67317	1.30659	2.5937	0.00950126	0.0316774	-2.94064	Bacteroidetes	Bacteroidia	Bacteroidales	Paludibacteraceae	uncultured	B1223_uncultured	Not_predicted	Non-fer
AB252950.1.1502	80.1745	0.494228	6.86817	6.67623e-12	1.13793e-10	-2.17226	Bacteroidetes	Ignavibacteria	Kryptoniales	BSV26	uncultured Chlorobi bacterium	B5468_uncultured Chlorobi bacterium	Not_predicted	Non-fer
AB630807.1.1448	9.28435	0.386614	2.68357	0.00728956	0.0253106	-2.95967	Bacteroidetes	Bacteroidia	Chitinophagales	Chitinophagaceae	Ferruginibacter	B3111_Ferruginibacter	Not_predicted	Non-fer
AB672159.1.1453	16.3275	0.595651	3.65565	0.000257126	0.00126519	-1.9156	Bacteroidetes	Bacteroidia	Chitinophagales	Chitinophagaceae	Dinghuibacter	B1083_Dinghuibacter	Not_predicted	Non-fer
AB754058.1.1441	52.1337	0.13208	3.65004	0.000262802	0.00129154	-4.14842	Bacteroidetes	Bacteroidia	Bacteroidales	Prolixibacteraceae	BSV13	B6715_BSV13	Not_predicted	Non-fer
AB930594.1.1451	22.0642	0.0779821	2.92546	0.00344297	0.0132593	-3.77965	Bacteroidetes	Ignavibacteria	Kryptoniales	BSV26	denitrifying bacterium enrichment culture clone NOB_2_A7	B11404_denitrifying bacterium enrichment culture clone NOB_2_A7	Not_predicted	Non-fer
AB974259.1.1427	61.561	0.155964	4.31008	1.63905e-05	0.000103017	-3.95737	Bacteroidetes	Bacteroidia	Chitinophagales	Chitinophagaceae	Taibaiella	B11079_Taibaiella	Not_predicted	Non-fer
AF493648.1.1297	23.7886	0.486745	7.75087	9.52061e-15	2.41619e-13	13.8154	Bacteroidetes	Bacteroidia	Flavobacteriales	Flavobacteriaceae	Flavobacterium	B626_Flavobacterium	Not_predicted	Non-fer
AF493651.1.1271	29.1614	0.591014	10.2526	1.30884e-24	8.99966e-23	29.7668	Bacteroidetes	Bacteroidia	Flavobacteriales	Flavobacteriaceae	Flavobacterium	B1377_Flavobacterium	Not_predicted	Non-fer
b350758854b79942fa3bd139d9872d04	19.3888	0.750628	5.09898	3.44317e-07	2.96577e-06	1.86112	Bacteroidetes	Bacteroidia	Bacteroidales	Prolixibacteraceae	BSV13	B1645_BSV13	Not_predicted	Non-fer
b7c1632bfec0499a178520191010e2ce	45.7201	0.115831	3.201	0.00137145	0.00580089	-4.26028	Bacteroidetes	Ignavibacteria	OPB56	uncultured bacterium	#N/A	B4689_f_uncultured bacterium	Not_predicted	Non-fer
d16c299110d68cbf69fd8a3f36f09a45	47.5223	0.261957	3.96511	7.35938e-05	0.000403587	-3.86006	Bacteroidetes	Ignavibacteria	Kryptoniales	BSV26	uncultured bacterium	B6953_uncultured bacterium	Not_predicted	Non-fer
DQ083110.1.1480	8.6143	0.776691	2.80891	0.00497537	0.0180992	-2.60744	Bacteroidetes	Bacteroidia	Sphingobacteriales	Sphingobacteriaceae	#N/A	B1424_f_Sphingobacteriaceae	Not_predicted	Non-fer
DQ297978.1.1459	67.5789	0.184149	5.64894	1.63435e-08	1.71426e-07	-3.04372	Bacteroidetes	Bacteroidia	Chitinophagales	Chitinophagaceae	Flavisolibacter	B7784_Flavisolibacter	Not_predicted	Non-fer
eada5c35d3fd20ece30380a7ff36c235	13.109	0.182072	2.64374	0.00820544	0.0278535	-3.46808	Bacteroidetes	Ignavibacteria	Kryptoniales	BSV26	uncultured bacterium	B4515_uncultured bacterium	Not_predicted	Non-fer
EF515896.1.1446	45.4709	0.193813	3.34812	0.000814968	0.00363035	-4.18931	Bacteroidetes	Bacteroidia	Sphingobacteriales	env.OPS 17	uncultured Sphingobacteriia bacterium	B2923_uncultured Sphingobacteriia bacterium	Not_predicted	Non-fer
EF516898.1.1441	33.7933	0.146817	4.84286	1.28851e-06	1.00155e-05	-1.83687	Bacteroidetes	Bacteroidia	Sphingobacteriales	env.OPS 17	uncultured bacterium	B12283_uncultured bacterium	Not_predicted	Non-fer
EU133640.1.1364	12.3397	0.171387	2.48859	0.0128325	0.0405872	-3.62503	Bacteroidetes	Bacteroidia	Chitinophagales	Chitinophagaceae	Niastella	B9230_Niastella	Not_predicted	Non-fer
f3c9801a3701d7d19c4b298a06d466d9	10.5353	0.231165	2.63108	0.00851728	0.0287785	-3.21232	Bacteroidetes	Bacteroidia	Flavobacteriales	Crocinitomicaceae	Crocinitomix	B15664_Crocinitomix	Not_predicted	Non-fer
FJ903177.1.1413	30.5817	0.0833333	2.55633	0.010585	0.0346868	-4.31955	Bacteroidetes	Bacteroidia	Flavobacteriales	Weeksellaceae	Chryseobacterium	B19557_Chryseobacterium	Not_predicted	Non-fer
FM866275.1.1450	12.2117	0.749157	4.39688	1.10331e-05	7.16392e-05	1.36534	Bacteroidetes	Bacteroidia	Chitinophagales	Chitinophagaceae	Flavisolibacter	B351_Flavisolibacter	Not_predicted	Non-fer
FN400860.1.1337	56.2387	0.14248	3.93744	8.26074e-05	0.000446024	-4.06912	Bacteroidetes	Bacteroidia	Sphingobacteriales	Sphingobacteriaceae	Mucilaginibacter	B4150_Mucilaginibacter	Not_predicted	Non-fer
FN984878.1.1404	42.8361	0.108525	2.99909	0.00271093	0.0107436	-4.30581	Bacteroidetes	Bacteroidia	Chitinophagales	Chitinophagaceae	Sediminibacterium	B6449_Sediminibacterium	Not_predicted	Non-fer
FPLL01003424.15.1517	70.5423	0.422362	7.45433	9.36614e-14	2.0365e-12	-0.465828	Bacteroidetes	Bacteroidia	Sphingobacteriales	AKYH767	metagenome	B1318_metagenome	Not_predicted	Non-fer
FPLL01008473.13.1516	57.9504	0.146817	4.05729	4.9817e-05	0.000281445	-4.03428	Bacteroidetes	Bacteroidia	Chitinophagales	Chitinophagaceae	Niastella	B4207_Niastella	Not_predicted	Non-fer
FPLS01006203.16.1519	14.3378	0.300914	2.92345	0.00346524	0.013326	-3.14304	Bacteroidetes	Bacteroidia	Cytophagales	Microscillaceae	Chryseolinea	B5748_Chryseolinea	Not_predicted	Non-fer
FPLS01012794.14.1516	60.9019	0.154294	4.26393	2.01702e-05	0.000124631	-3.97176	Bacteroidetes	Bacteroidia	Cytophagales	Microscillaceae	Ohtaekwangia	B8457_Ohtaekwangia	Not_predicted	Non-fer
FPLS01016958.18.1514	59.8585	0.151651	4.19088	2.78958e-05	0.000167105	-3.99422	Bacteroidetes	Bacteroidia	Sphingobacteriales	env.OPS 17	#N/A	B2153_f_env.OPS 17	Not_predicted	Non-fer
FPLS01034428.1.1345	57.9504	0.146817	4.05729	4.9817e-05	0.000281445	-4.03428	Bacteroidetes	Bacteroidia	Cytophagales	Microscillaceae	uncultured	B12296_uncultured	Not_predicted	Non-fer
FPLS01038502.17.1246	44.0028	0.478578	11.8887	1.70439e-32	2.3641e-30	33.0906	Bacteroidetes	Bacteroidia	Sphingobacteriales	KD3-93	#N/A	B2651_f_KD3-93	Not_predicted	Non-fer
FR749751.1.1487	79.383	0.570611	6.33903	2.35698e-10	3.20844e-09	-2.7836	Bacteroidetes	Bacteroidia	Sphingobacteriales	Sphingobacteriaceae	Pedobacter	B2426_Pedobacter	Not_predicted	Non-fer
FR772068.1.1464	108.941	0.871824	10.1717	3.00099e-24	1.97724e-22	1.67205	Bacteroidetes	Bacteroidia	Flavobacteriales	Flavobacteriaceae	Flavobacterium	B793_Flavobacterium	Not_predicted	Non-fer
GU390143.1.1290	39.9798	0.269264	3.6358	0.000277746	0.00135669	-3.88486	Bacteroidetes	Bacteroidia	Bacteroidales	Prolixibacteraceae	BSV13	B9889_BSV13	Not_predicted	Non-fer
HM263029.1.1346	55.308	0.140122	3.87228	0.000108133	0.0005697	-4.08763	Bacteroidetes	Bacteroidia	Flavobacteriales	Flavobacteriaceae	Flavobacterium	B12056_Flavobacterium	Not_predicted	Non-fer
HM278741.1.1348	51.861	0.141318	4.33507	1.46357e-05	9.29314e-05	-3.70325	Bacteroidetes	Bacteroidia	Flavobacteriales	Flavobacteriaceae	Flavobacterium	B7036_Flavobacterium	Not_predicted	Non-fer
HM335384.1.1352	8.94713	1.76283	2.76199	0.00574985	0.0206047	-2.75467	Bacteroidetes	Bacteroidia	Sphingobacteriales	Sphingobacteriaceae	Mucilaginibacter	B585_Mucilaginibacter	Not_predicted	Non-fer
HQ003600.1.1490	56.7034	0.44778	10.3438	5.09618e-25	3.59638e-23	13.7784	Bacteroidetes	Bacteroidia	Bacteroidales	SB-5	uncultured Bacteroidetes bacterium	B5030_uncultured Bacteroidetes bacterium	Not_predicted	Non-fer
HQ119996.1.1502	20.488	0.767563	2.91466	0.0035644	0.0136486	-3.69639	Bacteroidetes	Bacteroidia	Chitinophagales	Chitinophagaceae	Flavisolibacter	B814_Flavisolibacter	Not_predicted	Non-fer
HQ178712.1.1440	31.7214	0.459005	8.28216	1.27779e-16	4.07929e-15	12.9286	Bacteroidetes	Bacteroidia	Sphingobacteriales	NS11-12 marine group	metagenome	B2142_metagenome	Not_predicted	Non-fer
JF222236.1.1355	37.9711	0.214285	5.51574	3.51226e-08	3.54977e-07	-0.901136	Bacteroidetes	Bacteroidia	Chitinophagales	37-13	uncultured Sphingobacteriales bacterium	B6422_uncultured Sphingobacteriales bacterium	Not_predicted	Non-fer
JF266325.1.1360	15.0314	0.208769	2.85181	0.00435116	0.0162211	-3.33647	Bacteroidetes	Bacteroidia	Chitinophagales	Chitinophagaceae	Terrimonas	B5444_Terrimonas	Not_predicted	Non-fer
JF807996.1.1288	49.5217	0.134944	4.13953	3.49311e-05	0.00020423	-3.78656	Bacteroidetes	Bacteroidia	Cytophagales	Spirosomaceae	Dyadobacter	B10239_Dyadobacter	Not_predicted	Non-fer
JF915325.1.1387	69.4062	0.396112	9.78614	1.43577e-22	7.91151e-21	6.82244	Bacteroidetes	Bacteroidia	Sphingobacteriales	Sphingobacteriaceae	Pedobacter	B2067_Pedobacter	Not_predicted	Non-fer
JN391902.1.1488	43.645	0.277147	3.41339	0.000642758	0.00291652	-4.12251	Bacteroidetes	Bacteroidia	Sphingobacteriales	env.OPS 17	uncultured bacterium	B3278_uncultured bacterium	Not_predicted	Non-fer
JN637322.1.1364	31.6756	0.137617	4.53939	5.67166e-06	3.87339e-05	-2.18897	Bacteroidetes	Bacteroidia	Cytophagales	Spirosomaceae	Dyadobacter	B4828_Dyadobacter	Not_predicted	Non-fer
JN656879.1.1479	29.2032	0.323038	6.32195	2.63243e-10	3.54739e-09	3.68836	Bacteroidetes	Bacteroidia	Bacteroidales	Prolixibacteraceae	WCHB1-32	B9257_WCHB1-32	Not_predicted	Non-fer
JX114402.1.1472	54.319	0.137617	3.80304	0.000143316	0.000740039	-4.10695	Bacteroidetes	Bacteroidia	Flavobacteriales	Flavobacteriaceae	Flavobacterium	B8469_Flavobacterium	Not_predicted	Non-fer
KC286748.1.1500	65.2833	0.165394	4.57068	4.88782e-06	3.39573e-05	-3.87321	Bacteroidetes	Bacteroidia	Chitinophagales	Chitinophagaceae	Ferruginibacter	B9976_Ferruginibacter	Not_predicted	Non-fer
KC286792.1.1497	115.273	0.452527	10.1025	6.0742e-24	3.87833e-22	0.931715	Bacteroidetes	Bacteroidia	Chitinophagales	Chitinophagaceae	Ferruginibacter	B1709_Ferruginibacter	Not_predicted	Non-fer
KC331413.1.1469	9.87497	0.340063	3.53476	0.000408975	0.00193314	-0.953661	Bacteroidetes	Bacteroidia	Cytophagales	Spirosomaceae	Dyadobacter	B5664_Dyadobacter	Not_predicted	Non-fer
KC424712.1.1516	9.12029	4.41738	4.35823	1.31715e-05	8.42314e-05	2.09233	Bacteroidetes	Bacteroidia	Bacteroidales	Bacteroidetes vadinHA17	uncultured prokaryote	B49_uncultured prokaryote	Not_predicted	Non-fer
KC854846.1.1453	12.5962	0.56804	4.65172	3.31091e-06	2.374e-05	2.24528	Bacteroidetes	Bacteroidia	Chitinophagales	Chitinophagaceae	Flavisolibacter	B947_Flavisolibacter	Not_predicted	Non-fer
KF063112.1.1355	27.4968	0.952741	5.75125	8.97604e-09	9.78486e-08	1.94934	Bacteroidetes	Bacteroidia	Cytophagales	Cytophagaceae	Cytophaga	B3022_Cytophaga	Not_predicted	Non-fer
KJ465939.1.1486	54.9687	0.149787	4.59484	4.35473e-06	3.0624e-05	-3.58662	Bacteroidetes	Bacteroidia	Cytophagales	Microscillaceae	Ohtaekwangia	B11917_Ohtaekwangia	Not_predicted	Non-fer
KM021173.1.1262	12.1321	0.168502	2.4322	0.0150154	0.0464579	-3.68579	Bacteroidetes	Bacteroidia	Flavobacteriales	Flavobacteriaceae	Flavobacterium	B9587_Flavobacterium	Not_predicted	Non-fer
KM205524.1.1459	13.5364	0.188005	2.56817	0.0102303	0.0336893	-3.61738	Bacteroidetes	Ignavibacteria	Kryptoniales	BSV26	uncultured soil bacterium	B1360_uncultured soil bacterium	Not_predicted	Non-fer
KM410615.1.1474	12.2993	0.170826	2.48045	0.0131292	0.0414212	-3.633	Bacteroidetes	Bacteroidia	Sphingobacteriales	Lentimicrobiaceae	uncultured prokaryote	B5110_uncultured prokaryote	Not_predicted	Non-fer
KU161444.1.1457	50.2706	0.12736	3.5196	0.000433067	0.00203863	-4.18243	Bacteroidetes	Bacteroidia	Bacteroidales	Paludibacteraceae	Paludibacter	B11669_Paludibacter	Not_predicted	Non-fer
KY190606.1.1438	15.0205	0.746745	2.94867	0.0031948	0.0124285	-3.17713	Bacteroidetes	Bacteroidia	Chitinophagales	Saprospiraceae	uncultured	B586_uncultured	Not_predicted	Non-fer
LN570710.1.1362	13.047	0.18121	2.66349	0.007739	0.0266297	-3.43155	Bacteroidetes	Bacteroidia	Cytophagales	Microscillaceae	Ohtaekwangia	B4885_Ohtaekwangia	Not_predicted	Non-fer
AJ390449.1.1278	31.2627	0.203387	4.35312	1.3482e-05	8.5877e-05	-2.48687	BRC1	uncultured soil bacterium PBS-III-4	uncultured soil bacterium PBS-III-4	uncultured soil bacterium PBS-III-4	uncultured soil bacterium PBS-III-4	B3639_uncultured soil bacterium PBS-III-4	Not_predicted	Non-fer
f2e576614286851d4926e8102c92e30a	10.928	0.449786	4.04882	5.16533e-05	0.000291002	0.455999	BRC1	uncultured soil bacterium	uncultured soil bacterium	uncultured soil bacterium	uncultured soil bacterium	B5851_uncultured soil bacterium	Not_predicted	Non-fer
851f57decb6a4615a41409b02a1bb6db	7.88226	0.276425	2.76938	0.00562105	0.0201611	-2.59448	Calditrichaeota	Calditrichia	Calditrichales	Calditrichaceae	uncultured Sulfuricurvum sp.	B10455_uncultured Sulfuricurvum sp.	Not_predicted	Non-fer
18acd00feb2ba4f9eeeb0a16823cdffa	40.7756	0.111111	3.40844	0.00065453	0.00296659	-4.06401	Chlamydiae	Chlamydiae	Chlamydiales	#N/A	#N/A	B16503_o_Chlamydiales	Not_predicted	Non-fer
3243c0ce0bb3351d8b366633f0a2fccd	44.0573	0.120054	3.68276	0.000231278	0.00114783	-3.96621	Chlamydiae	Chlamydiae	Chlamydiales	Parachlamydiaceae	Neochlamydia	B15524_Neochlamydia	Not_predicted	Non-fer
b5cce6ece2cc34b9d16b8699d16bb8f8	44.5819	0.157567	5.91107	3.44909e-09	3.9527e-08	-0.883806	Chlamydiae	Chlamydiae	Chlamydiales	Parachlamydiaceae	#N/A	B10891_f_Parachlamydiaceae	Not_predicted	Non-fer
ceb85871b716f2f3ec9a1573d213b01e	20.3163	0.0718045	2.69371	0.00707145	0.0246905	-3.92259	Chlamydiae	Chlamydiae	Chlamydiales	Simkaniaceae	uncultured	B20439_uncultured	Not_predicted	Non-fer
e66bb3564f1344f848e78eb9630e83c9	37.93	0.0960953	2.6556	0.00792246	0.0270527	-4.37644	Chlamydiae	Chlamydiae	Chlamydiales	#N/A	#N/A	B13423_o_Chlamydiales	Not_predicted	Non-fer
03a16484d56baca4ce5702377805b1c9	22.0642	0.0779821	2.92546	0.00344297	0.0132593	-3.77965	Chloroflexi	Anaerolineae	#N/A	#N/A	#N/A	B17380_o_NA	Not_predicted	Non-fer
0b08a0a25e5a97056e7b30f09e601ab1	39.3064	0.0995823	2.75196	0.00592879	0.0211504	-4.35749	Chloroflexi	Dehalococcoidia	FW22	uncultured Chloroflexi bacterium	uncultured Chloroflexi bacterium	B17750_uncultured Chloroflexi bacterium	Not_predicted	Non-fer
0b22e380d59ca9e066bdc9388ff3536f	45.7114	0.376623	6.32775	2.5356e-10	3.42263e-09	-0.0310179	Chloroflexi	Anaerolineae	SBR1031	metagenome	metagenome	B2961_metagenome	Not_predicted	Non-fer
0b8d7bc1da200d3cfaef6391607094b7	42.189	0.136303	3.56389	0.00036617	0.00174931	-3.9984	Chloroflexi	Anaerolineae	RBG-13-54-9	#N/A	#N/A	B5587_o_RBG-13-54-9	Not_predicted	Non-fer
0d4eff436fec318b1254126f4539fbae	14.8358	0.206051	2.72265	0.00648114	0.0228788	-3.51276	Chloroflexi	Anaerolineae	RBG-13-54-9	uncultured prokaryote	uncultured prokaryote	B5648_uncultured prokaryote	Not_predicted	Non-fer
0d6c9c6feece6ea97a09fc135f042579	53.1046	0.144707	4.43902	9.08066e-06	5.97822e-05	-3.65739	Chloroflexi	TK10	uncultured bacterium	uncultured bacterium	uncultured bacterium	B6025_uncultured bacterium	Not_predicted	Non-fer
0ef6a2602b71ae5a01a14294390fe5be	39.3608	0.89343	5.99848	2.02278e-09	2.38961e-08	0.121057	Chloroflexi	Anaerolineae	Anaerolineales	Anaerolineaceae	Anaerolinea	B990_Anaerolinea	Not_predicted	Non-fer
1698a32c152277c3b92f3435f3ae94a0	23.3234	0.818556	4.86284	1.16509e-06	9.11784e-06	-0.00888295	Chloroflexi	Anaerolineae	Anaerolineales	Anaerolineaceae	uncultured	B1194_uncultured	Not_predicted	Non-fer
1d18b62c2c563fbe725e664c3d8f3ecf	14.3614	0.199442	2.41235	0.015858	0.0487124	-3.87638	Chloroflexi	Anaerolineae	Anaerolineales	Anaerolineaceae	Anaerolinea	B6236_Anaerolinea	Not_predicted	Non-fer
1e2eeba70654a605cf3d3a41a4c524f2	16.2179	0.27022	2.92602	0.00343677	0.0132593	-3.33874	Chloroflexi	Anaerolineae	SBR1031	A4b	uncultured bacterium	B4189_uncultured bacterium	Not_predicted	Non-fer
1f604677ba2044af58f185b9145e7234	45.7201	0.115831	3.201	0.00137145	0.00580089	-4.26028	Chloroflexi	SHA-26	uncultured soil bacterium	uncultured soil bacterium	uncultured soil bacterium	B11233_uncultured soil bacterium	Not_predicted	Non-fer
25073e0f46dbf9f68f91cfde8f80b6fe	36.4224	0.0922758	2.55005	0.0107776	0.0350751	-4.39642	Chloroflexi	Dehalococcoidia	RBG-13-46-9	uncultured bacterium	uncultured bacterium	B5299_uncultured bacterium	Not_predicted	Non-fer
254d95970b85e14d14b5afb6a4377ede	45.7201	0.115831	3.201	0.00137145	0.00580089	-4.26028	Chloroflexi	Dehalococcoidia	#N/A	#N/A	#N/A	B4739_o_NA	Not_predicted	Non-fer
25d079550bbb3335e413c8514bc26add	24.7074	0.674239	7.73479	1.08007e-14	2.7069e-13	13.1985	Chloroflexi	Anaerolineae	Anaerolineales	Anaerolineaceae	Leptolinea	B1314_Leptolinea	Not_predicted	Non-fer
2dd8478ac1cccf01ab08a4f277618821	13.2178	0.306022	3.16026	0.00157842	0.00656587	-2.5344	Chloroflexi	Anaerolineae	Anaerolineales	Anaerolineaceae	uncultured	B1764_uncultured	Not_predicted	Non-fer
2fd53e658a40a5d9b85dc2669997120e	20.0413	0.596642	4.93149	8.21999e-07	6.54751e-06	1.04964	Chloroflexi	Anaerolineae	SBR1031	#N/A	#N/A	B2319_o_SBR1031	Not_predicted	Non-fer
312623c078ccbeed5c561f7a098fbae9	47.3867	0.120054	3.31769	0.000909134	0.00400766	-4.23263	Chloroflexi	Dehalococcoidia	SAR202 clade	uncultured bacterium	uncultured bacterium	B8080_uncultured bacterium	Not_predicted	Non-fer
319affa3c6604ed12d946ef7e36863dc	19.3672	0.12736	4.09549	4.2279e-05	0.000243824	-1.36719	Chloroflexi	Dehalococcoidia	#N/A	#N/A	#N/A	B12477_o_NA	Not_predicted	Non-fer
36421190c84e8ac6735a9f27219d1fd5	12.6042	0.402635	4.48495	7.33002e-06	4.91374e-05	1.58483	Chloroflexi	Ktedonobacteria	C0119	uncultured Chloroflexi bacterium	uncultured Chloroflexi bacterium	B1891_uncultured Chloroflexi bacterium	Not_predicted	Non-fer
3649423984dd005e3913d7ce50b4f707	22.2531	0.768996	4.71422	2.44121e-06	1.7983e-05	-0.221508	Chloroflexi	Dehalococcoidia	S085	uncultured bacterium	uncultured bacterium	B683_uncultured bacterium	Not_predicted	Non-fer
374578cb814851ebb06aa320ff4cae76	40.5725	0.10279	2.84061	0.00450691	0.0166934	-4.33946	Chloroflexi	Ktedonobacteria	Ktedonobacterales	Ktedonobacteraceae	#N/A	B8826_f_Ktedonobacteraceae	Not_predicted	Non-fer
3bd60fc6b8db26864dcaa2eed8d86cd7	50.0203	0.136303	4.18121	2.91086e-05	0.000173337	-3.76913	Chloroflexi	Dehalococcoidia	Dehalococcoidales	uncultured	uncultured Dehalogenimonas sp.	B7999_uncultured Dehalogenimonas sp.	Not_predicted	Non-fer
3bfbd3c49d4768e37b15b1ce1d5f33e4	24.764	0.174077	3.63328	0.000280478	0.00136671	-3.05223	Chloroflexi	SHA-26	uncultured Chloroflexi bacterium	uncultured Chloroflexi bacterium	uncultured Chloroflexi bacterium	B3984_uncultured Chloroflexi bacterium	Not_predicted	Non-fer
3c6632c630fc23127a4faa546de7b168	62.2619	0.446402	7.35612	1.95967e-13	4.13794e-12	0.243683	Chloroflexi	#N/A	#N/A	#N/A	#N/A	B4851_o_NA	Not_predicted	Non-fer
3df6e1579b2e0e33ab7a6510b29921dc	8.90967	0.272202	2.47514	0.0133257	0.0419591	-3.30469	Chloroflexi	Anaerolineae	Anaerolineales	Anaerolineaceae	uncultured	B1750_uncultured	Not_predicted	Non-fer
41bd154607a3d5488ab9260456aa5426	27.16	0.117998	3.89225	9.961e-05	0.000527907	-2.86373	Chloroflexi	Anaerolineae	RBG-13-54-9	uncultured bacterium UASB_TL14	uncultured bacterium UASB_TL14	B10685_uncultured bacterium UASB_TL14	Not_predicted	Non-fer
4e63b2144b88b5c552d4c2d1ed081772	23.4886	0.430951	4.74899	2.05721e-06	1.5367e-05	-0.387775	Chloroflexi	Anaerolineae	#N/A	#N/A	#N/A	B3191_o_NA	Not_predicted	Non-fer
54151e049006b20d35faacd6780e5c1e	30.7059	0.108525	4.07126	4.69238e-05	0.000267922	-2.89969	Chloroflexi	Anaerolineae	Ardenticatenales	uncultured	uncultured archaeon	B16842_uncultured archaeon	Not_predicted	Non-fer
56012dfa1137502b4a716400a35df702	94.2341	0.559904	8.45389	2.99027e-17	1.02369e-15	-0.579121	Chloroflexi	Anaerolineae	Anaerolineales	Anaerolineaceae	uncultured	B1013_uncultured	Not_predicted	Non-fer
63d7e907f267953b46d44d01ac7f0660	46.1127	0.125654	3.85457	0.000116263	0.00060894	-3.9011	Chloroflexi	Dehalococcoidia	FW22	uncultured Chloroflexi bacterium	uncultured Chloroflexi bacterium	B12100_uncultured Chloroflexi bacterium	Not_predicted	Non-fer
6603a9ff7109cee79e32c615fd226a28	41.1942	0.178971	5.90348	3.61126e-09	4.12093e-08	-0.427382	Chloroflexi	Anaerolineae	RBG-13-54-9	#N/A	#N/A	B4105_o_RBG-13-54-9	Not_predicted	Non-fer
6676e0a4160fb7078f33d39f31c94501	8.4837	0.562036	2.56902	0.0102051	0.0336201	-3.08425	Chloroflexi	Chloroflexia	Chloroflexales	Roseiflexaceae	uncultured	B4254_uncultured	Not_predicted	Non-fer
799b21ea07dee9d75a5b46432e758848	39.3064	0.0995823	2.75196	0.00592879	0.0211504	-4.35749	Chloroflexi	Anaerolineae	SBR1031	#N/A	#N/A	B14659_o_SBR1031	Not_predicted	Non-fer
7a8a052bb3c750fbaeda8a5aa997df26	14.4959	0.201331	3.16421	0.00155719	0.00648761	-2.71292	Chloroflexi	Anaerolineae	SJA-15	metagenome	metagenome	B6058_metagenome	Not_predicted	Non-fer
7e3f9191f1ed3cf1dbd28210890061f4	38.7587	0.583813	8.39297	5.02239e-17	1.64919e-15	10.2227	Chloroflexi	Anaerolineae	RBG-13-54-9	uncultured bacterium UASB_TL14	uncultured bacterium UASB_TL14	B2822_uncultured bacterium UASB_TL14	Not_predicted	Non-fer
7e478d8900d19da77d39afd32f5b91bf	7.44315	1.55032	3.51131	0.000446798	0.00209836	-0.540886	Chloroflexi	Anaerolineae	RBG-13-54-9	#N/A	#N/A	B798_o_RBG-13-54-9	Not_predicted	Non-fer
80dd9a09429948bbe9947a23996afa9f	15.645	0.92259	3.21535	0.00130473	0.00556255	-2.76865	Chloroflexi	Anaerolineae	Anaerolineales	Anaerolineaceae	Leptolinea	B473_Leptolinea	Not_predicted	Non-fer
80f3a0341df05888ba8f94732234361c	11.8789	0.282219	2.52445	0.011595	0.0372679	-3.53039	Chloroflexi	Anaerolineae	RBG-13-54-9	#N/A	#N/A	B1953_o_RBG-13-54-9	Not_predicted	Non-fer
843abb8a2f63bffb86aef531b70732b7	11.5873	0.273399	2.8004	0.00510838	0.0185121	-3.03083	Chloroflexi	Chloroflexia	Chloroflexales	Roseiflexaceae	Kouleothrix	B9544_Kouleothrix	Not_predicted	Non-fer
86a50fa6f998aa2d3bcbe8a1de4950bc	65.6787	0.178971	5.49009	4.06158e-08	4.06917e-07	-3.13268	Chloroflexi	Anaerolineae	SBR1031	uncultured Gemmatimonadetes bacterium	uncultured Gemmatimonadetes bacterium	B1679_uncultured Gemmatimonadetes bacterium	Not_predicted	Non-fer
893fcaaa34b3fb7f9a24a42cb8118ae7	5.8072	1.70703	2.66829	0.00762933	0.0263538	-2.58666	Chloroflexi	SHA-26	uncultured bacterium	uncultured bacterium	uncultured bacterium	B1009_uncultured bacterium	Not_predicted	Non-fer
8cbd1e21328bf394b04e3d120bb3070a	11.9999	0.166667	2.44973	0.0143041	0.0446032	-3.65019	Chloroflexi	Anaerolineae	uncultured Bellilinea sp.	uncultured Bellilinea sp.	uncultured Bellilinea sp.	B9772_uncultured Bellilinea sp.	Not_predicted	Non-fer
8d68874ea767dbc5695bfcae3199b4cc	47.3867	0.120054	3.31769	0.000909134	0.00400766	-4.23263	Chloroflexi	Anaerolineae	SBR1031	uncultured soil bacterium	uncultured soil bacterium	B15585_uncultured soil bacterium	Not_predicted	Non-fer
8e88102ac34418000ba4cd67ee7f1c75	67.8667	0.17194	4.75156	2.03127e-06	1.52015e-05	-3.8119	Chloroflexi	Anaerolineae	SBR1031	anaerobic bacterium MO-CFX2	anaerobic bacterium MO-CFX2	B6441_anaerobic bacterium MO-CFX2	Not_predicted	Non-fer
8ffd471f8c5c589344ef0ab8d83dc171	18.437	0.569366	5.13925	2.78196e-07	2.41955e-06	2.31975	Chloroflexi	Anaerolineae	Anaerolineales	Anaerolineaceae	Anaerolinea	B857_Anaerolinea	Not_predicted	Non-fer
91536f474c4729caf23673896e207dd9	32.1251	0.113541	4.25942	2.05804e-05	0.000126389	-2.72763	Chloroflexi	Ktedonobacteria	Ktedonobacterales	JG30-KF-AS9	Chloroflexi bacterium Ellin7237	B9696_Chloroflexi bacterium Ellin7237	Not_predicted	Non-fer
96d8c523f1e95716c5dfd93b42a40115	10.531	0.195066	3.70913	0.000208485	0.00104437	-0.567666	Chloroflexi	Anaerolineae	SBR1031	uncultured Chlorobi bacterium	uncultured Chlorobi bacterium	B5431_uncultured Chlorobi bacterium	Not_predicted	Non-fer
99aae9068313fec350b9ac26cd92c00b	45.7201	0.115831	3.201	0.00137145	0.00580089	-4.26028	Chloroflexi	JG30-KF-CM66	uncultured Anaerolineales bacterium	uncultured Anaerolineales bacterium	uncultured Anaerolineales bacterium	B8730_uncultured Anaerolineales bacterium	Not_predicted	Non-fer
9a3de7f9980557e22a24883831214e05	75.463	0.191185	5.28339	1.28018e-07	1.17703e-06	-3.61783	Chloroflexi	Anaerolineae	Caldilineales	Caldilineaceae	uncultured	B7015_uncultured	Not_predicted	Non-fer
9b7b13b4ed4391008e7381a554d6048f	41.2456	0.145776	5.46871	4.58252e-08	4.55141e-07	-1.43635	Chloroflexi	JG30-KF-CM66	uncultured bacterium	uncultured bacterium	uncultured bacterium	B5600_uncultured bacterium	Not_predicted	Non-fer
9dadbf4d3479dbde49c3aa22611f9029	103.677	0.292754	5.67822	1.37821e-08	1.46663e-07	-3.88029	Chloroflexi	Anaerolineae	Anaerolineales	Anaerolineaceae	uncultured	B3077_uncultured	Not_predicted	Non-fer
a01b9b93718d497a398c4cd7c3cea5f5	7.41155	0.350587	2.75184	0.00593105	0.0211504	-2.5724	Chloroflexi	Anaerolineae	RBG-13-54-9	uncultured bacterium UASB_TL14	uncultured bacterium UASB_TL14	B5737_uncultured bacterium UASB_TL14	Not_predicted	Non-fer
a647a5e37b25156c87627e5829d9911d	57.7935	0.436881	8.20277	2.47655e-16	7.663e-15	3.46566	Chloroflexi	Anaerolineae	SBR1031	#N/A	#N/A	B6680_o_SBR1031	Not_predicted	Non-fer
aab7438720b6171f674b8c2a69feefbf	46.4616	0.201855	6.65835	2.83449e-11	4.3518e-10	0.745251	Chloroflexi	Anaerolineae	SBR1031	uncultured Gemmatimonadetes bacterium	uncultured Gemmatimonadetes bacterium	B3769_uncultured Gemmatimonadetes bacterium	Not_predicted	Non-fer
AB488119.1.1330	12.0986	0.789032	2.6884	0.00718499	0.0250231	-3.29132	Chloroflexi	Ktedonobacteria	C0119	uncultured bacterium	uncultured bacterium	B1630_uncultured bacterium	Not_predicted	Non-fer
AB672212.1.1423	6.73183	3.00678	2.41636	0.0156848	0.048217	-3.18877	Chloroflexi	Anaerolineae	Anaerolineales	Anaerolineaceae	Anaerolinea	B271_Anaerolinea	Not_predicted	Non-fer
ac99a4173fc171fece58f39c085ed26e	40.5725	0.10279	2.84061	0.00450691	0.0166934	-4.33946	Chloroflexi	TK10	uncultured bacterium	uncultured bacterium	uncultured bacterium	B16944_uncultured bacterium	Not_predicted	Non-fer
ae06758a249a9bc5eb24aa78122d2b17	22.5998	0.284134	5.17614	2.28509e-07	2.02239e-06	1.21312	Chloroflexi	Anaerolineae	SBR1031	uncultured soil bacterium	uncultured soil bacterium	B6270_uncultured soil bacterium	Not_predicted	Non-fer
AF524017.1.1242	15.0155	0.20855	3.01025	0.00261328	0.0104182	-3.07015	Chloroflexi	Anaerolineae	Anaerolineales	Anaerolineaceae	Anaerolinea	B5452_Anaerolinea	Not_predicted	Non-fer
AJ009475.1.1487	44.7748	0.122009	3.74273	0.000182491	0.00092452	-3.94382	Chloroflexi	Anaerolineae	ADurb.Bin180	uncultured bacterium SJA-68	uncultured bacterium SJA-68	B7182_uncultured bacterium SJA-68	Not_predicted	Non-fer
AY922170.1.1343	8.8768	0.86082	3.46281	0.000535572	0.00248053	-0.962081	Chloroflexi	TK10	Chloroflexi bacterium JEA33	Chloroflexi bacterium JEA33	Chloroflexi bacterium JEA33	B1419_Chloroflexi bacterium JEA33	Not_predicted	Non-fer
b0520fe0326028abbc747f3ded021f03	47.1287	0.406936	4.9758	6.54696e-07	5.36904e-06	-2.8035	Chloroflexi	Anaerolineae	#N/A	#N/A	#N/A	B5679_o_NA	Not_predicted	Non-fer
b0664d435dd443f8e2c5d9b2329c322d	53.8003	0.136303	3.76673	0.000165832	0.00084545	-4.11695	Chloroflexi	Ktedonobacteria	C0119	uncultured soil bacterium	uncultured soil bacterium	B13565_uncultured soil bacterium	Not_predicted	Non-fer
b06b084e08c70e9ac202772f782f8957	57.9635	0.204862	7.68531	1.58993e-14	3.88785e-13	1.76407	Chloroflexi	Anaerolineae	SBR1031	uncultured bacterium	uncultured bacterium	B5741_uncultured bacterium	Not_predicted	Non-fer
b28b22585e5563e9a2ccdb9a6c6f3f26	11.2294	0.155964	2.4512	0.0142459	0.0444564	-3.5789	Chloroflexi	Anaerolineae	RBG-13-54-9	uncultured Anaerolineaceae bacterium	uncultured Anaerolineaceae bacterium	B4273_uncultured Anaerolineaceae bacterium	Not_predicted	Non-fer
b7b37c44f12cd9b993453bec840af8ae	36.0351	0.12736	4.77785	1.78318e-06	1.35082e-05	-2.21336	Chloroflexi	Anaerolineae	SBR1031	A4b	uncultured bacterium	B3640_uncultured bacterium	Not_predicted	Non-fer
b8f660f4d9b802244a7028fab665e3fc	44.0055	0.191185	6.30637	2.91091e-10	3.88363e-09	0.180937	Chloroflexi	Anaerolineae	Anaerolineales	Anaerolineaceae	Anaerolinea	B7020_Anaerolinea	Not_predicted	Non-fer
bf194074a8d2e1057620b4569a3b385f	14.9675	0.415768	3.06946	0.00214704	0.00872047	-2.95756	Chloroflexi	Anaerolineae	Anaerolineales	Anaerolineaceae	#N/A	B462_f_Anaerolineaceae	Not_predicted	Non-fer
bf68d2be564ca6b886743a9dc02781cc	23.6266	1.23986	7.09205	1.36136e-12	2.58305e-11	9.80734	Chloroflexi	Anaerolineae	SBR1031	A4b	uncultured bacterium	B875_uncultured bacterium	Not_predicted	Non-fer
c06e735bb04a62e74932834fd23fe772	20.0215	0.3972	3.63072	0.000283276	0.00137893	-2.53418	Chloroflexi	JG30-KF-CM66	metagenome	metagenome	metagenome	B3317_metagenome	Not_predicted	Non-fer
c114ed6d72ea65d2b7e8f509bf2eb536	51.422	0.140122	4.29838	1.72793e-05	0.000107929	-3.71918	Chloroflexi	Dehalococcoidia	vadinBA26	#N/A	#N/A	B5342_o_vadinBA26	Not_predicted	Non-fer
c9a5b97d0ee40e51906b19cffae2b27b	41.047	0.203387	4.95448	7.30605e-07	5.8895e-06	-2.37971	Chloroflexi	Anaerolineae	ADurb.Bin180	#N/A	#N/A	B9096_o_ADurb.Bin180	Not_predicted	Non-fer
cc03b165582d509db5dfc98edc91285d	10.0581	3.95402	5.30445	1.14104e-07	1.06246e-06	6.0443	Chloroflexi	Anaerolineae	RBG-13-54-9	uncultured bacterium	uncultured bacterium	B273_uncultured bacterium	Not_predicted	Non-fer
cc18b2d2015d0d15b91f53be6482c210	80.9138	0.440826	9.01434	2.13827e-19	9.15022e-18	2.04582	Chloroflexi	Anaerolineae	Anaerolineales	Anaerolineaceae	uncultured	B824_uncultured	Not_predicted	Non-fer
d17c5eb90c3ca33f3b028a9746afa258	12.4554	0.369865	2.94917	0.0031896	0.0124203	-2.85889	Chloroflexi	Dehalococcoidia	#N/A	#N/A	#N/A	B2973_o_NA	Not_predicted	Non-fer
d947234159082d0eab0ebfd599779da5	32.1251	0.113541	4.25942	2.05804e-05	0.000126389	-2.72763	Chloroflexi	Anaerolineae	RBG-13-54-9	#N/A	#N/A	B6487_o_RBG-13-54-9	Not_predicted	Non-fer
d9f663161c5af5120dfe331096f7b3aa	39.2971	0.138889	5.21035	1.90181e-07	1.69623e-06	-1.73919	Chloroflexi	Anaerolineae	Anaerolineales	Anaerolineaceae	uncultured	B5305_uncultured	Not_predicted	Non-fer
ddc276f11f9b598b776915c9e482c294	12.2169	0.169681	2.49404	0.0126371	0.0401048	-3.60637	Chloroflexi	Anaerolineae	Anaerolineales	Anaerolineaceae	uncultured	B3978_uncultured	Not_predicted	Non-fer
e8a7c4f436b2509f3b3189e85690be53	36.0351	0.12736	4.77785	1.78318e-06	1.35082e-05	-2.21336	Chloroflexi	Anaerolineae	SBR1031	#N/A	#N/A	B9793_o_SBR1031	Not_predicted	Non-fer
eb0e5bcb5542972acee9023a4a878997	7.6008	1.09974	3.47383	0.000514079	0.00238924	-0.685156	Chloroflexi	Anaerolineae	RBG-13-54-9	uncultured Caldilineaceae bacterium	uncultured Caldilineaceae bacterium	B1090_uncultured Caldilineaceae bacterium	Not_predicted	Non-fer
ef9c5c65d1c241b2d93d5638cd41dfa3	55.308	0.140122	3.87228	0.000108133	0.0005697	-4.08763	Chloroflexi	Anaerolineae	SBR1031	uncultured Gemmatimonadetes bacterium	uncultured Gemmatimonadetes bacterium	B10490_uncultured Gemmatimonadetes bacterium	Not_predicted	Non-fer
EU644259.1.1454	13.6659	0.189803	2.50795	0.0121507	0.0388521	-3.70939	Chloroflexi	KD4-96	uncultured prokaryote	uncultured prokaryote	uncultured prokaryote	B5025_uncultured prokaryote	Not_predicted	Non-fer
f07d5950a23e65cb24d65edbb795940b	33.8634	0.0922758	2.83065	0.00464962	0.0170493	-4.24526	Chloroflexi	Dehalococcoidia	Sh765B-TzT-20	uncultured Chlorobi bacterium	uncultured Chlorobi bacterium	B14738_uncultured Chlorobi bacterium	Not_predicted	Non-fer
f5ba9ab424bf437c8231fedea6e8076c	138.262	0.384274	4.90855	9.2407e-07	7.31476e-06	-4.36696	Chloroflexi	Anaerolineae	SBR1031	A4b	wastewater metagenome	B3698_wastewater metagenome	Not_predicted	Non-fer
FJ468378.1.1308	15.6958	0.475589	2.74709	0.00601758	0.0213831	-3.55348	Chloroflexi	Anaerolineae	Anaerolineales	Anaerolineaceae	uncultured	B4865_uncultured	Not_predicted	Non-fer
FJ592900.1.1349	24.9137	0.0880535	3.30329	0.000957115	0.00419389	-3.52133	Chloroflexi	TK10	#N/A	#N/A	#N/A	B19139_o_NA	Not_predicted	Non-fer
FPLL01001877.15.1485	19.5146	0.454065	4.30877	1.64879e-05	0.000103467	-0.815656	Chloroflexi	KD4-96	metagenome	metagenome	metagenome	B879_metagenome	Not_predicted	Non-fer
FPLM01000410.1.1347	11.8045	2.77561	4.8284	1.38559e-06	1.07184e-05	3.2403	Chloroflexi	Anaerolineae	SBR1031	A4b	wastewater metagenome	B447_wastewater metagenome	Not_predicted	Non-fer
FQ660158.1.1291	9.31877	0.352451	3.26644	0.00109077	0.00469266	-1.60264	Chloroflexi	Chloroflexia	Chloroflexales	Roseiflexaceae	uncultured	B5830_uncultured	Not_predicted	Non-fer
HE974801.1.1463	70.7712	0.192848	5.91578	3.35186e-09	3.85225e-08	-2.88857	Chloroflexi	Anaerolineae	Anaerolineales	Anaerolineaceae	uncultured	B2800_uncultured	Not_predicted	Non-fer
HM270445.1.1318	60.214	0.152551	4.21577	2.49922e-05	0.000150948	-3.98661	Chloroflexi	Chloroflexia	Thermomicrobiales	JG30-KF-CM45	uncultured anaerobic ammonium-oxidizing bacterium	B6727_uncultured anaerobic ammonium-oxidizing bacterium	Not_predicted	Non-fer
HM312380.1.1315	14.8691	0.206517	3.03547	0.0024044	0.0096572	-3.00752	Chloroflexi	Anaerolineae	Anaerolineales	Anaerolineaceae	Anaerolinea	B983_Anaerolinea	Not_predicted	Non-fer
HQ014648.1.1450	56.2387	0.14248	3.93744	8.26074e-05	0.000446024	-4.06912	Chloroflexi	TK10	uncultured Chloroflexus sp.	uncultured Chloroflexus sp.	uncultured Chloroflexus sp.	B8464_uncultured Chloroflexus sp.	Not_predicted	Non-fer
JF124601.1.1321	25.4143	0.451625	3.3583	0.000785551	0.00351098	-3.48687	Chloroflexi	KD4-96	#N/A	#N/A	#N/A	B73_o_NA	Not_predicted	Non-fer
JF429007.1.1517	13.9918	0.590327	4.05774	4.97207e-05	0.000281445	-0.298475	Chloroflexi	Ktedonobacteria	C0119	uncultured bacterium	uncultured bacterium	B3932_uncultured bacterium	Not_predicted	Non-fer
JF775628.1.1474	9.58598	4.43237	4.9666	6.86474e-07	5.58976e-06	4.57577	Chloroflexi	Anaerolineae	Anaerolineales	Anaerolineaceae	RBG-16-58-14	B91_RBG-16-58-14	Not_predicted	Non-fer
JN038587.1.1459	30.4168	0.779085	8.27372	1.37134e-16	4.34347e-15	13.5686	Chloroflexi	Anaerolineae	Ardenticatenales	uncultured	uncultured prokaryote	B2346_uncultured prokaryote	Not_predicted	Non-fer
JN397929.1.1416	17.6144	0.244649	3.55237	0.000382574	0.00181582	-2.35835	Chloroflexi	Anaerolineae	Anaerolineales	Anaerolineaceae	Anaerolinea	B1156_Anaerolinea	Not_predicted	Non-fer
JQ278983.1.1445	59.4949	0.15073	4.16542	3.11964e-05	0.000183865	-4.00195	Chloroflexi	Dehalococcoidia	S085	uncultured Chloroflexi bacterium	uncultured Chloroflexi bacterium	B11773_uncultured Chloroflexi bacterium	Not_predicted	Non-fer
JQ809240.1.1467	26.1084	0.0922758	3.46168	0.000537827	0.00248382	-3.40372	Chloroflexi	Anaerolineae	RBG-13-54-9	uncultured planctomycete	uncultured planctomycete	B10841_uncultured planctomycete	Not_predicted	Non-fer
JX079206.1.1279	13.1035	0.406042	3.99036	6.61872e-05	0.000367732	-0.293931	Chloroflexi	Anaerolineae	SJA-15	uncultured bacterium	uncultured bacterium	B1138_uncultured bacterium	Not_predicted	Non-fer
JX133443.1.1455	44.0835	0.501499	7.3527	2.01027e-13	4.22483e-12	3.54661	Chloroflexi	Anaerolineae	SBR1031	A4b	uncultured bacterium	B2070_uncultured bacterium	Not_predicted	Non-fer
JX504939.1.1441	50.7673	0.179429	6.73118	1.72428e-11	2.77756e-10	0.254243	Chloroflexi	Anaerolineae	uncultured Bellilinea sp.	uncultured Bellilinea sp.	uncultured Bellilinea sp.	B1054_uncultured Bellilinea sp.	Not_predicted	Non-fer
JX505064.1.1431	13.8138	0.191858	3.01532	0.00257001	0.0102609	-2.91191	Chloroflexi	Anaerolineae	RBG-13-54-9	uncultured Anaerolineaceae bacterium	uncultured Anaerolineaceae bacterium	B1923_uncultured Anaerolineaceae bacterium	Not_predicted	Non-fer
KJ877469.1.1315	76.2475	0.193172	5.33832	9.47396e-08	8.92483e-07	-3.59662	Chloroflexi	Anaerolineae	SBR1031	anaerobic bacterium MO-CFX2	anaerobic bacterium MO-CFX2	B5335_anaerobic bacterium MO-CFX2	Not_predicted	Non-fer
KM205496.1.1422	60.1976	0.190843	2.55062	0.0107598	0.0350751	-4.51845	Chloroflexi	SHA-26	#N/A	#N/A	#N/A	B4358_o_NA	Not_predicted	Non-fer
KX753080.1.1455	30.0209	0.628677	3.54218	0.000397648	0.00188514	-3.55282	Chloroflexi	Chloroflexia	Thermomicrobiales	JG30-KF-CM45	metagenome	B3715_metagenome	Not_predicted	Non-fer
LN573059.1.1334	20.4176	0.633801	4.16978	3.06064e-05	0.000181051	-1.37126	Chloroflexi	KD4-96	metagenome	metagenome	metagenome	B390_metagenome	Not_predicted	Non-fer
0fbd739953e5b004cfbff147c34e205f	8.21568	0.21152	2.86849	0.00412834	0.0155417	-2.41639	Cyanobacteria	Sericytochromatia	uncultured bacterium	uncultured bacterium	uncultured bacterium	B6235_uncultured bacterium	Not_predicted	Non-fer
7c033989f8ff2de939afb9fac9ce6f7c	58.8966	0.210062	5.07711	3.86335e-07	3.29244e-06	-3.28171	Cyanobacteria	Melainabacteria	Gastranaerophilales	uncultured organism	uncultured organism	B13711_uncultured organism	Not_predicted	Non-fer
c150cea0c8080e9fce878ecaca22c29b	10.9643	0.195678	2.7008	0.00692262	0.0242247	-3.13776	Cyanobacteria	Sericytochromatia	#N/A	#N/A	#N/A	B15130_o_NA	Not_predicted	Non-fer
cb157a7bc9ad2da3e76299390cd9ecf9	14.3397	0.199165	2.9274	0.00342162	0.0132087	-3.13642	Cyanobacteria	Oxyphotobacteria	Nostocales	Nostocaceae	Nostoc PCC-7107	B6271_Nostoc PCC-7107	Not_predicted	Non-fer
eb35540501102b12cbe47a6ea824dd3a	42.2731	0.327442	6.19568	5.90637e-10	7.62708e-09	0.166441	Cyanobacteria	Melainabacteria	Obscuribacterales	uncultured bacterium	uncultured bacterium	B7308_uncultured bacterium	Not_predicted	Non-fer
EF516816.1.1436	32.9831	0.365661	6.06744	1.32088e-09	1.6022e-08	1.65402	Cyanobacteria	Sericytochromatia	uncultured bacterium	uncultured bacterium	uncultured bacterium	B3399_uncultured bacterium	Not_predicted	Non-fer
EU644189.1.1379	33.9678	0.120054	4.50375	6.71064e-06	4.53237e-05	-2.49261	Cyanobacteria	Sericytochromatia	uncultured bacterium	uncultured bacterium	uncultured bacterium	B5399_uncultured bacterium	Not_predicted	Non-fer
FR853013.1.1492	34.7558	0.0880535	2.43336	0.0149672	0.0463299	-4.41756	Cyanobacteria	Melainabacteria	Gastranaerophilales	uncultured organism	uncultured organism	B19152_uncultured organism	Not_predicted	Non-fer
HM240942.1.1312	36.2968	0.394076	8.85848	8.71304e-19	3.61322e-17	14.2164	Cyanobacteria	Oxyphotobacteria	Nostocales	Coleofasciculaceae	Microcoleus PCC-7113	B3853_Microcoleus PCC-7113	Not_predicted	Non-fer
JF124258.1.1325	44.0573	0.120054	3.68276	0.000231278	0.00114783	-3.96621	Cyanobacteria	Sericytochromatia	uncultured Bacillales bacterium	uncultured Bacillales bacterium	uncultured Bacillales bacterium	B5628_uncultured Bacillales bacterium	Not_predicted	Non-fer
JQ624966.1.1355	35.2651	0.0960953	2.94781	0.00320365	0.0124449	-4.21122	Cyanobacteria	Melainabacteria	Gastranaerophilales	Candidatus Melainabacteria bacterium RIFOXYA2_FULL_32_9	Candidatus Melainabacteria bacterium RIFOXYA2_FULL_32_9	B9896_Candidatus Melainabacteria bacterium RIFOXYA2_FULL_32_9	Not_predicted	Non-fer
KJ192051.1.1453	39.2971	0.138889	5.21035	1.90181e-07	1.69623e-06	-1.73919	Cyanobacteria	Oxyphotobacteria	Leptolyngbyales	Leptolyngbyaceae	JSC-12	B5959_JSC-12	Not_predicted	Non-fer
KM019936.1.1461	39.8264	0.108525	3.3291	0.000872706	0.00386189	-4.09089	Cyanobacteria	Oxyphotobacteria	Nostocales	Nostocaceae	#N/A	B17070_f_Nostocaceae	Not_predicted	Non-fer
KX504525.1.1447	20.7539	0.292969	4.09083	4.31368e-05	0.000248593	-1.62924	Cyanobacteria	Oxyphotobacteria	Synechococcales	Cyanobiaceae	Cyanobium PCC-6307	B7401_Cyanobium PCC-6307	Not_predicted	Non-fer
d48db86552e9486ad0012602b3263fe5	31.3732	0.136303	4.49604	6.95832e-06	4.67666e-05	-2.2374	Dependentiae	Babeliae	Babeliales	Vermiphilaceae	uncultured Candidatus Dependentiae bacterium	B13577_uncultured Candidatus Dependentiae bacterium	Not_predicted	Non-fer
FJ437950.1.1505	25.0698	0.199165	4.7256	2.30856e-06	1.71016e-05	-0.773204	Dependentiae	Babeliae	Babeliales	Vermiphilaceae	uncultured bacterium	B9363_uncultured bacterium	Not_predicted	Non-fer
KC172288.1.1510	41.6672	0.113541	3.48297	0.000496855	0.00231453	-4.03819	Dependentiae	Babeliae	Babeliales	Vermiphilaceae	uncultured soil bacterium	B7858_uncultured soil bacterium	Not_predicted	Non-fer
1b01dee2416da7a69e7bc556c163a0a9	12.3397	0.171387	2.48859	0.0128325	0.0405872	-3.62503	Elusimicrobia	Lineage IIa	uncultured actinobacterium	uncultured actinobacterium	uncultured actinobacterium	B9188_uncultured actinobacterium	Not_predicted	Non-fer
1c611a000ab9ae2500a240e62d424b28	29.3149	0.12736	4.20107	2.66703e-05	0.000160241	-2.55465	Elusimicrobia	Endomicrobia	Endomicrobiales	Endomicrobiaceae	Candidatus Endomicrobium	B10174_Candidatus Endomicrobium	Not_predicted	Non-fer
431d5595cffefcbf0b18ab5783b4c36c	9.22301	0.207206	2.60314	0.00924359	0.0308952	-3.10742	Elusimicrobia	Lineage IIb	metagenome	metagenome	metagenome	B7259_metagenome	Not_predicted	Non-fer
5767329a80c0164d90b444af84b80e41	60.8129	0.275191	7.03008	2.12441e-12	3.90202e-11	-0.339028	Elusimicrobia	Lineage IIb	uncultured bacterium	uncultured bacterium	uncultured bacterium	B4780_uncultured bacterium	Not_predicted	Non-fer
582a753362b5a19fedf9a72cd503bae1	51.422	0.140122	4.29838	1.72793e-05	0.000107929	-3.71918	Elusimicrobia	Lineage IIa	uncultured actinobacterium	uncultured actinobacterium	uncultured actinobacterium	B8621_uncultured actinobacterium	Not_predicted	Non-fer
65a0318d1aee53d380ddd51bc8b4021f	27.9971	0.14248	3.27023	0.00107626	0.00464734	-3.73572	Elusimicrobia	Elusimicrobia	MD2894-B20	uncultured bacterium	uncultured bacterium	B18204_uncultured bacterium	Not_predicted	Non-fer
9f88ad2b92151ca847dd0946d2c08bbb	17.8662	1.04266	7.59945	3.09248e-14	7.27457e-13	16.1869	Elusimicrobia	Lineage IIa	uncultured actinobacterium	uncultured actinobacterium	uncultured actinobacterium	B936_uncultured actinobacterium	Not_predicted	Non-fer
EU134601.1.1387	14.2392	1.09198	3.97366	7.10018e-05	0.000392045	-0.619798	Elusimicrobia	Lineage IIa	#N/A	#N/A	#N/A	B834_o_NA	Not_predicted	Non-fer
f7457ab5e18f0c5a5d2f1afbca6038d9	18.3484	0.494492	4.03448	5.49088e-05	0.000308694	-1.33189	Elusimicrobia	Elusimicrobia	MVP-88	uncultured bacterium	uncultured bacterium	B3894_uncultured bacterium	Not_predicted	Non-fer
fba0e294d78d5bdacb56268b1f36c3fc	58.3509	0.147831	4.08533	4.41706e-05	0.000253632	-4.02598	Elusimicrobia	Endomicrobia	Endomicrobiales	Endomicrobiaceae	Candidatus Endomicrobium	B6664_Candidatus Endomicrobium	Not_predicted	Non-fer
JF175029.1.1343	36.4224	0.0922758	2.55005	0.0107776	0.0350751	-4.39642	FBP	#N/A	#N/A	#N/A	#N/A	B18791_o_NA	Not_predicted	Non-fer
f0498b4589937fb529ad07fe1dba6fd5	33.8039	0.870302	8.58973	9.28701e-18	3.33545e-16	13.7964	Fibrobacteres	Fibrobacteria	Fibrobacterales	B122	uncultured bacterium	B2373_uncultured bacterium	Not_predicted	Non-fer
03a9124db2a5c074eb41c82a524bcfef	50.2706	0.12736	3.5196	0.000433067	0.00203863	-4.18243	Firmicutes	Clostridia	Clostridiales	Ruminococcaceae	Ruminiclostridium 1	B10427_Ruminiclostridium 1	Not_predicted	Non-fer
27d0a36893b80ed8455c5cb248afd981	59.4949	0.15073	4.16542	3.11964e-05	0.000183865	-4.00195	Firmicutes	Clostridia	Clostridiales	Ruminococcaceae	#N/A	B11690_f_Ruminococcaceae	Not_predicted	Non-fer
66d510f1d7eb78404f2b49cd07770cb7	37.3706	0.13208	4.95493	7.28937e-07	5.88195e-06	-2.02419	Firmicutes	Clostridia	Clostridiales	Ruminococcaceae	Ruminococcaceae UCG-010	B14082_Ruminococcaceae UCG-010	Not_predicted	Non-fer
840fdba983c00ff4e4af3bd6d53c1e75	42.8361	0.108525	2.99909	0.00271093	0.0107436	-4.30581	Firmicutes	Clostridia	Clostridiales	Clostridiaceae 1	#N/A	B16890_f_Clostridiaceae 1	Not_predicted	Non-fer
9340e1db262dbd32e9ac9a945fa08cc9	50.0653	0.291911	7.6985	1.43457e-14	3.5294e-13	3.3782	Firmicutes	Bacilli	Bacillales	Paenibacillaceae	Paenibacillus	B5735_Paenibacillus	Not_predicted	Non-fer
AB307638.1.1387	61.867	0.508538	12.1318	9.18913e-34	1.4967e-31	23.1954	Firmicutes	Clostridia	Clostridiales	Ruminococcaceae	Ruminiclostridium 1	B2213_Ruminiclostridium 1	Not_predicted	Non-fer
AB486472.1.1327	13.6297	0.40688	2.60067	0.00931052	0.0311059	-3.57982	Firmicutes	Clostridia	Clostridiales	Clostridiaceae 1	#N/A	B2433_f_Clostridiaceae 1	Not_predicted	Non-fer
AB486908.1.1338	14.2996	0.198604	2.62425	0.00869011	0.0292152	-3.60489	Firmicutes	Clostridia	Clostridiales	Clostridiaceae 1	#N/A	B2544_f_Clostridiaceae 1	Not_predicted	Non-fer
AB487194.1.1343	35.5637	0.549059	8.0604	7.98881e-16	2.30358e-14	9.75967	Firmicutes	Clostridia	Clostridiales	Clostridiaceae 1	Clostridium sensu stricto 12	B1527_Clostridium sensu stricto 12	Not_predicted	Non-fer
AB487423.1.1338	15.5381	0.215783	2.61001	0.00906019	0.0303286	-3.722	Firmicutes	Clostridia	Clostridiales	Clostridiaceae 1	#N/A	B4859_f_Clostridiaceae 1	Not_predicted	Non-fer
AB487679.1.1335	43.0163	0.186887	6.1646	7.18901e-10	9.07937e-09	-0.0376977	Firmicutes	Clostridia	Clostridiales	Ruminococcaceae	#N/A	B2994_f_Ruminococcaceae	Not_predicted	Non-fer
af3ee08e29420c386abf159e73f68408	65.1626	0.177564	5.44695	5.17884e-08	5.08095e-07	-3.15641	Firmicutes	Bacilli	Bacillales	Bacillaceae	#N/A	B7213_f_Bacillaceae	Not_predicted	Non-fer
AJ229230.1.1424	16.1968	0.406974	5.35758	8.51919e-08	8.05369e-07	4.03318	Firmicutes	Clostridia	Clostridiales	Clostridiaceae 1	Clostridium sensu stricto 10	B1570_Clostridium sensu stricto 10	Not_predicted	Non-fer
AY756145.1.1520	13.7653	0.191185	3.00473	0.00266112	0.0105852	-2.92569	Firmicutes	Clostridia	Clostridiales	Ruminococcaceae	#N/A	B7019_f_Ruminococcaceae	Not_predicted	Non-fer
cf839416bc8314e518e4ac265f0a5edc	20.2675	0.0880535	2.90451	0.00368193	0.0140651	-3.69394	Firmicutes	Clostridia	Clostridiales	#N/A	#N/A	B19080_o_Clostridiales	Not_predicted	Non-fer
DQ125722.1.1438	76.9672	0.321067	7.21763	5.46164e-13	1.07958e-11	-1.44812	Firmicutes	Clostridia	Clostridiales	Ruminococcaceae	#N/A	B3371_f_Ruminococcaceae	Not_predicted	Non-fer
DQ129396.1.1475	46.9779	0.166036	6.22875	4.78693e-10	6.25177e-09	-0.460492	Firmicutes	Clostridia	Clostridiales	Clostridiaceae 1	Clostridium sensu stricto 1	B2012_Clostridium sensu stricto 1	Not_predicted	Non-fer
DQ658765.1.1386	59.7535	0.294339	7.24294	4.53518e-13	9.12138e-12	0.291903	Firmicutes	Clostridia	Clostridiales	Peptococcaceae	Desulfosporosinus	B3742_Desulfosporosinus	Not_predicted	Non-fer
DQ767881.1.1555	56.6843	0.143609	3.96864	7.25122e-05	0.000398199	-4.06015	Firmicutes	Negativicutes	Selenomonadales	Veillonellaceae	Pelosinus	B12693_Pelosinus	Not_predicted	Non-fer
DQ787687.1.1547	53.8788	0.146817	4.50374	6.71104e-06	4.53237e-05	-3.62829	Firmicutes	Bacilli	Bacillales	Paenibacillaceae	Paenibacillus	B12280_Paenibacillus	Not_predicted	Non-fer
e89c204ce953d0cd937292b761488d0c	20.4293	0.252134	3.14674	0.00165321	0.00683808	-3.39372	Firmicutes	Clostridia	Clostridiales	Ruminococcaceae	#N/A	B8640_f_Ruminococcaceae	Not_predicted	Non-fer
EF512134.1.1488	12.5334	0.174077	2.52765	0.0114897	0.0370478	-3.5864	Firmicutes	Clostridia	Clostridiales	Clostridiaceae 1	Clostridium sensu stricto 5	B6519_Clostridium sensu stricto 5	Not_predicted	Non-fer
EU134650.1.1316	35.8988	0.155964	5.1446	2.70396e-07	2.35681e-06	-1.4642	Firmicutes	Bacilli	Bacillales	Paenibacillaceae	Paenibacillus	B5239_Paenibacillus	Not_predicted	Non-fer
EU778761.1.1359	13.8137	0.191858	2.82	0.00480661	0.0175808	-3.25989	Firmicutes	Bacilli	Bacillales	Planococcaceae	Lysinibacillus	B5047_Lysinibacillus	Not_predicted	Non-fer
EU844870.1.1533	49.6543	0.480511	4.62704	3.73046e-06	2.64419e-05	-3.35433	Firmicutes	Bacilli	Bacillales	Planococcaceae	Planococcus	B2058_Planococcus	Not_predicted	Non-fer
FJ535043.1.1473	52.552	0.185736	6.9678	3.31006e-12	5.94406e-11	0.610041	Firmicutes	Clostridia	Clostridiales	Ruminococcaceae	#N/A	B7614_f_Ruminococcaceae	Not_predicted	Non-fer
FR687487.1.1515	26.1084	0.0922758	3.46168	0.000537827	0.00248382	-3.40372	Firmicutes	Bacilli	Bacillales	Alicyclobacillaceae	Tumebacillus	B18776_Tumebacillus	Not_predicted	Non-fer
GU389730.1.1292	12.2584	0.170258	2.47219	0.0134362	0.0422407	-3.64106	Firmicutes	Clostridia	Clostridiales	Ruminococcaceae	Ruminiclostridium 1	B4961_Ruminiclostridium 1	Not_predicted	Non-fer
HM269045.1.1325	35.5735	0.564146	7.98743	1.44495e-15	4.03632e-14	9.35184	Firmicutes	Clostridia	Clostridiales	Clostridiaceae 1	#N/A	B3745_f_Clostridiaceae 1	Not_predicted	Non-fer
JN133808.1.1280	54.6143	0.148821	4.56522	5.01668e-06	3.46431e-05	-3.60026	Firmicutes	Clostridia	Clostridiales	Peptococcaceae	Desulfosporosinus	B9817_Desulfosporosinus	Not_predicted	Non-fer
JN398066.1.1502	67.8667	0.17194	4.75156	2.03127e-06	1.52015e-05	-3.8119	Firmicutes	Clostridia	Clostridiales	Ruminococcaceae	#N/A	B3180_f_Ruminococcaceae	Not_predicted	Non-fer
JQ711714.1.1511	26.5774	0.538575	6.5241	6.98977e-11	1.02427e-09	5.51402	Firmicutes	Clostridia	Clostridiales	Clostridiaceae 1	Fonticella	B2486_Fonticella	Not_predicted	Non-fer
JX223420.1.1217	66.1826	0.206051	4.93733	7.97789e-07	6.36727e-06	-3.64116	Firmicutes	Clostridia	Clostridiales	Gracilibacteraceae	Lutispora	B8117_Lutispora	Not_predicted	Non-fer
JX223787.1.1207	11.9165	0.294751	3.9838	6.80387e-05	0.0003762	-0.0184951	Firmicutes	Clostridia	Clostridiales	Peptococcaceae	Desulfosporosinus	B2546_Desulfosporosinus	Not_predicted	Non-fer
JX225602.1.1258	37.93	0.0960953	2.6556	0.00792246	0.0270527	-4.37644	Firmicutes	Clostridia	Clostridiales	Family XI	Sedimentibacter	B18407_Sedimentibacter	Not_predicted	Non-fer
JX542557.1.1443	36.4224	0.0922758	2.55005	0.0107776	0.0350751	-4.39642	Firmicutes	Clostridia	Clostridiales	Family XIV	uncultured	B16459_uncultured	Not_predicted	Non-fer
KC846029.1.1524	33.8634	0.0922758	2.83065	0.00464962	0.0170493	-4.24526	Firmicutes	Clostridia	MBA03	#N/A	#N/A	B18811_o_MBA03	Not_predicted	Non-fer
KF071208.1.1345	62.8023	0.159109	4.39698	1.1028e-05	7.16392e-05	-3.92986	Firmicutes	Clostridia	Clostridiales	Lachnospiraceae	#N/A	B6753_f_Lachnospiraceae	Not_predicted	Non-fer
KJ875466.1.1488	14.3614	0.199442	2.41235	0.015858	0.0487124	-3.87638	Firmicutes	Bacilli	Bacillales	Planococcaceae	Lysinibacillus	B6258_Lysinibacillus	Not_predicted	Non-fer
KM251015.1.1449	60.4573	0.164743	5.05364	4.36944e-07	3.69245e-06	-3.36405	Firmicutes	Clostridia	Clostridiales	Ruminococcaceae	uncultured	B10080_uncultured	Not_predicted	Non-fer
KM251084.1.1463	61.2349	0.155138	4.28724	1.81674e-05	0.00011295	-3.96451	Firmicutes	Bacilli	Bacillales	Planococcaceae	Rummeliibacillus	B11217_Rummeliibacillus	Not_predicted	Non-fer
KM874449.1.1423	79.7181	0.217227	6.66365	2.73425e-11	4.22208e-10	-2.41557	Firmicutes	Bacilli	Bacillales	Bacillaceae	Bacillus	B4749_Bacillus	Not_predicted	Non-fer
KT760573.1.1338	46.6121	0.164743	6.18025	6.51254e-10	8.3562e-09	-0.526553	Firmicutes	Bacilli	Bacillales	Bacillaceae	Bacillus	B10081_Bacillus	Not_predicted	Non-fer
KX527708.1.1425	13.2877	0.184552	2.52099	0.0117095	0.0375759	-3.66125	Firmicutes	Bacilli	Bacillales	Bacillaceae	Bacillus	B7762_Bacillus	Not_predicted	Non-fer
KY287459.1.1502	48.8943	0.123873	3.42324	0.000619921	0.00281607	-4.20675	Firmicutes	Bacilli	Bacillales	Paenibacillaceae	#N/A	B5283_f_Paenibacillaceae	Not_predicted	Non-fer
KY419863.1.1427	41.6672	0.113541	3.48297	0.000496855	0.00231453	-4.03819	Firmicutes	Bacilli	Bacillales	Paenibacillaceae	Paenibacillus	B16472_Paenibacillus	Not_predicted	Non-fer
LC020492.1.1491	9.01228	1.19629	3.9857	6.74997e-05	0.000374507	0.715195	Firmicutes	Clostridia	Clostridiales	Clostridiaceae 1	Clostridium sensu stricto 1	B546_Clostridium sensu stricto 1	Not_predicted	Non-fer
7a28a3abb74bdc866d6939ee6a081740	49.5217	0.134944	4.13953	3.49311e-05	0.00020423	-3.78656	Gemmatimonadetes	Gemmatimonadetes	Gemmatimonadales	Gemmatimonadaceae	uncultured	B13710_uncultured	Not_predicted	Non-fer
817382e383a90d09558fd535ba3117f2	24.03	0.684442	6.19798	5.8209e-10	7.5288e-09	4.94584	Gemmatimonadetes	S0134 terrestrial group	uncultured bacterium	uncultured bacterium	uncultured bacterium	B1212_uncultured bacterium	Not_predicted	Non-fer
AF432642.1.1424	15.2295	0.21152	2.79491	0.00519598	0.0187957	-3.44296	Gemmatimonadetes	Gemmatimonadetes	Gemmatimonadales	Gemmatimonadaceae	uncultured	B5183_uncultured	Not_predicted	Non-fer
AY102345.1.1331	12.715	0.176599	2.54906	0.0108081	0.0351602	-3.57187	Gemmatimonadetes	Gemmatimonadetes	Gemmatimonadales	Gemmatimonadaceae	uncultured	B6597_uncultured	Not_predicted	Non-fer
AY395331.1.1393	7.7401	1.03826	2.87775	0.00400907	0.0151779	-2.32705	Gemmatimonadetes	Gemmatimonadetes	Gemmatimonadales	Gemmatimonadaceae	Gemmatimonas	B327_Gemmatimonas	Not_predicted	Non-fer
c31c1af323441ec69fcba3d251e57eb8	17.1664	0.867767	5.15636	2.53981e-07	2.23065e-06	2.8118	Gemmatimonadetes	S0134 terrestrial group	#N/A	#N/A	#N/A	B684_o_NA	Not_predicted	Non-fer
d0f4436fb3f0c70585fe19405f4833bf	23.6433	0.56768	6.80731	1.01997e-11	1.70242e-10	8.19273	Gemmatimonadetes	S0134 terrestrial group	uncultured Gemmatimonadetes bacterium	uncultured Gemmatimonadetes bacterium	uncultured Gemmatimonadetes bacterium	B1408_uncultured Gemmatimonadetes bacterium	Not_predicted	Non-fer
DQ067025.1.1382	41.8272	0.147831	5.54582	2.95933e-08	3.01747e-07	-1.34312	Gemmatimonadetes	Gemmatimonadetes	Gemmatimonadales	Gemmatimonadaceae	#N/A	B8966_f_Gemmatimonadaceae	Not_predicted	Non-fer
EF018446.1.1369	5.20237	4.99195	2.84954	0.00438229	0.016322	-2.11409	Gemmatimonadetes	Gemmatimonadetes	Gemmatimonadales	Gemmatimonadaceae	uncultured	B98_uncultured	Not_predicted	Non-fer
EU134810.1.1342	14.0446	0.195066	2.86715	0.00414578	0.0155919	-3.20625	Gemmatimonadetes	Gemmatimonadetes	Gemmatimonadales	Gemmatimonadaceae	uncultured	B484_uncultured	Not_predicted	Non-fer
EU223950.1.1499	85.2447	0.215966	5.96824	2.43497e-09	2.84729e-08	-3.33764	Gemmatimonadetes	Gemmatimonadetes	Gemmatimonadales	Gemmatimonadaceae	Gemmatimonas	B4840_Gemmatimonas	Not_predicted	Non-fer
FPLL01000557.16.1508	29.3164	0.830763	5.59975	2.17227e-08	2.24338e-07	0.953969	Gemmatimonadetes	Gemmatimonadetes	Gemmatimonadales	Gemmatimonadaceae	uncultured	B1032_uncultured	Not_predicted	Non-fer
FPLM01001703.9.1498	39.8264	0.108525	3.3291	0.000872706	0.00386189	-4.09089	Gemmatimonadetes	Gemmatimonadetes	Gemmatimonadales	Gemmatimonadaceae	uncultured	B17025_uncultured	Not_predicted	Non-fer
GQ396953.1.1502	14.0223	0.194756	2.8626	0.00420574	0.0157373	-3.21147	Gemmatimonadetes	Gemmatimonadetes	Gemmatimonadales	Gemmatimonadaceae	Gemmatimonas	B2643_Gemmatimonas	Not_predicted	Non-fer
JX489958.1.1473	36.5447	0.0995823	3.05478	0.00225495	0.00911152	-4.17893	Gemmatimonadetes	Gemmatimonadetes	Gemmatimonadales	Gemmatimonadaceae	Gemmatimonas	B18086_Gemmatimonas	Not_predicted	Non-fer
KM205492.1.1450	12.0701	2.01992	2.66006	0.00781832	0.0268669	-3.33551	Gemmatimonadetes	Gemmatimonadetes	Gemmatimonadales	Gemmatimonadaceae	Gemmatimonas	B75_Gemmatimonas	Not_predicted	Non-fer
4c17011c29d915692b76d71de0f159ef	45.7201	0.115831	3.201	0.00137145	0.00580089	-4.26028	Halanaerobiaeota	Halanaerobiia	Halanaerobiales	Halanaerobiaceae	Halocella	B16022_Halocella	Not_predicted	Non-fer
009ec534e35181ed661f433114b3c286	42.8361	0.108525	2.99909	0.00271093	0.0107436	-4.30581	Hydrogenedentes	Hydrogenedentia	Hydrogenedentiales	Hydrogenedensaceae	uncultured bacterium SJP-3	B16773_uncultured bacterium SJP-3	Not_predicted	Non-fer
754b09cb2a99a26c6bb92bdc44eed130	28.9223	0.125654	4.14481	3.41368e-05	0.000200299	-2.61272	Hydrogenedentes	Hydrogenedentia	Hydrogenedentiales	Hydrogenedensaceae	#N/A	B14858_f_Hydrogenedensaceae	Not_predicted	Non-fer
4887d7fd17d8ad0c19944eab95cbd303	64.2681	0.229372	2.76518	0.00569383	0.020413	-4.49973	Kiritimatiellaeota	Kiritimatiellae	WCHB1-41	uncultured Verrucomicrobia bacterium	uncultured Verrucomicrobia bacterium	B11810_uncultured Verrucomicrobia bacterium	Not_predicted	Non-fer
92ba87cda40065bc76609c49bccdd7c4	50.2706	0.12736	3.5196	0.000433067	0.00203863	-4.18243	Kiritimatiellaeota	Kiritimatiellae	WCHB1-41	uncultured Verrucomicrobia bacterium	uncultured Verrucomicrobia bacterium	B14679_uncultured Verrucomicrobia bacterium	Not_predicted	Non-fer
b5a59a4434131903c4302c9fbf142380	47.339	0.128996	3.95707	7.61115e-05	0.000415976	-3.86084	Kiritimatiellaeota	Kiritimatiellae	WCHB1-41	uncultured soil bacterium PBS-III-20	uncultured soil bacterium PBS-III-20	B9019_uncultured soil bacterium PBS-III-20	Not_predicted	Non-fer
d53f73e7aafb96db55fba744cd6bf5a7	46.6121	0.164743	6.18025	6.51254e-10	8.3562e-09	-0.526553	Kiritimatiellaeota	Kiritimatiellae	WCHB1-41	uncultured Verrucomicrobia bacterium	uncultured Verrucomicrobia bacterium	B8058_uncultured Verrucomicrobia bacterium	Not_predicted	Non-fer
KR095243.1.1546	5.70358	1.87503	2.447	0.0144129	0.0448903	-3.04635	Kiritimatiellaeota	Kiritimatiellae	WCHB1-41	uncultured soil bacterium PBS-III-20	uncultured soil bacterium PBS-III-20	B930_uncultured soil bacterium PBS-III-20	Not_predicted	Non-fer
094c43f100f433ade36915f0c912375b	19.9565	0.894191	3.2045	0.00135489	0.00575204	-3.26827	Latescibacteria	uncultured bacterium	uncultured bacterium	uncultured bacterium	uncultured bacterium	B3004_uncultured bacterium	Not_predicted	Non-fer
1ddc0a20b15805fe7dcd3ef280d6aa95	64.3543	0.247414	4.38398	1.1707e-05	7.55932e-05	-3.96672	Latescibacteria	uncultured soil bacterium	uncultured soil bacterium	uncultured soil bacterium	uncultured soil bacterium	B5713_uncultured soil bacterium	Not_predicted	Non-fer
3eec8212aeed08b99f7d1e7a63e8a525	9.71644	0.277739	2.675	0.00747835	0.0258656	-3.03135	Latescibacteria	uncultured soil bacterium	uncultured soil bacterium	uncultured soil bacterium	uncultured soil bacterium	B5840_uncultured soil bacterium	Not_predicted	Non-fer
4cb538fed71f0c21f3baafe39a634c20	34.8723	0.174077	4.29088	1.78726e-05	0.000111203	-2.9084	Latescibacteria	#N/A	#N/A	#N/A	#N/A	B8832_o_NA	Not_predicted	Non-fer
6617e5d5b0907f9a0e601c6687182893	12.2559	0.293076	2.55252	0.0107014	0.0350112	-3.52405	Latescibacteria	uncultured bacterium	uncultured bacterium	uncultured bacterium	uncultured bacterium	B3833_uncultured bacterium	Not_predicted	Non-fer
a66e12a470fb795faf012b74c89b4691	45.6424	0.161315	6.05167	1.45666e-09	1.74648e-08	-0.699178	Latescibacteria	uncultured bacterium	uncultured bacterium	uncultured bacterium	uncultured bacterium	B3835_uncultured bacterium	Not_predicted	Non-fer
a70f1bea3b867e27871a48c8a4f00fdb	14.4384	0.200532	2.64973	0.00806146	0.0274574	-3.58136	Latescibacteria	uncultured Acidobacterium sp.	uncultured Acidobacterium sp.	uncultured Acidobacterium sp.	uncultured Acidobacterium sp.	B5151_uncultured Acidobacterium sp.	Not_predicted	Non-fer
AB426188.1.1420	59.4598	0.162025	4.97026	6.73648e-07	5.50762e-06	-3.40607	Latescibacteria	uncultured Acidobacterium sp.	uncultured Acidobacterium sp.	uncultured Acidobacterium sp.	uncultured Acidobacterium sp.	B2045_uncultured Acidobacterium sp.	Not_predicted	Non-fer
AJ390458.1.1363	11.2959	1.60735	5.29436	1.20577e-07	1.11756e-06	5.5621	Latescibacteria	uncultured soil bacterium PBS-III-30	uncultured soil bacterium PBS-III-30	uncultured soil bacterium PBS-III-30	uncultured soil bacterium PBS-III-30	B883_uncultured soil bacterium PBS-III-30	Not_predicted	Non-fer
KJ955651.1.1518	25.5748	0.111111	3.66508	0.000247838	0.00122322	-3.07603	Latescibacteria	Latescibacteria	Latescibacterales	Latescibacteraceae	Candidatus Latescibacter	B14014_Candidatus Latescibacter	Not_predicted	Non-fer
048c7f8a0e03c0624978c5d796024ea7	33.3102	0.395759	6.70333	2.08658e-11	3.31095e-10	3.98898	LCP-89	uncultured bacterium	uncultured bacterium	uncultured bacterium	uncultured bacterium	B7994_uncultured bacterium	Not_predicted	Non-fer
61bef6131c1d16fb33bbf0caf8cd6c44	12.5707	0.174595	2.52013	0.0117381	0.0376527	-3.60057	Nitrospinae	P9X2b3D02	#N/A	#N/A	#N/A	B8836_o_NA	Not_predicted	Non-fer
KP896360.1.1422	74.5401	0.393592	8.31117	1.00179e-16	3.22376e-15	1.0444	Nitrospinae	P9X2b3D02	uncultured prokaryote	uncultured prokaryote	uncultured prokaryote	B2280_uncultured prokaryote	Not_predicted	Non-fer
KX505066.1.1520	72.987	0.198885	6.10099	1.0717e-09	1.3123e-08	-2.77667	Nitrospinae	P9X2b3D02	#N/A	#N/A	#N/A	B4037_o_NA	Not_predicted	Non-fer
0555ad21e25be18addc8c1772150b375	13.3448	0.185345	2.53183	0.0113538	0.0366684	-3.65124	Nitrospirae	4-29-1	uncultured proteobacterium	uncultured proteobacterium	uncultured proteobacterium	B4433_uncultured proteobacterium	Not_predicted	Non-fer
31ebbdd6f7d16274097d307d4a552d3d	13.1091	0.182072	2.62806	0.00859324	0.0289258	-3.49184	Nitrospirae	Thermodesulfovibrionia	uncultured	uncultured bacterium	uncultured bacterium	B2599_uncultured bacterium	Not_predicted	Non-fer
60bb81a2aa77565e17fd7d8a7f226ec4	77.3497	0.658354	12.6547	1.41386e-36	3.24987e-34	19.2353	Nitrospirae	Thermodesulfovibrionia	uncultured	uncultured bacterium	uncultured bacterium	B1063_uncultured bacterium	Not_predicted	Non-fer
AB238766.1.1444	6.01368	3.69031	3.34409	0.000826899	0.00367739	-0.835259	Nitrospirae	Thermodesulfovibrionia	uncultured	uncultured bacterium	uncultured bacterium	B313_uncultured bacterium	Not_predicted	Non-fer
AF524005.1.1260	26.2434	0.826248	7.5705	3.86378e-14	8.85588e-13	11.3468	Nitrospirae	Thermodesulfovibrionia	uncultured	#N/A	#N/A	B493_o_uncultured	Not_predicted	Non-fer
b13d25d2535d65d2e192530a7fcea1dc	12.4189	0.172485	2.71084	0.00671647	0.0236266	-3.28901	Nitrospirae	Thermodesulfovibrionia	uncultured	uncultured bacterium	uncultured bacterium	B9094_uncultured bacterium	Not_predicted	Non-fer
bea993147149ebd27701625369bed552	12.7045	0.286374	2.92521	0.00344579	0.0132638	-2.93869	Nitrospirae	Thermodesulfovibrionia	uncultured	uncultured bacterium	uncultured bacterium	B2401_uncultured bacterium	Not_predicted	Non-fer
HM334175.1.1361	14.6274	0.203136	2.45703	0.0140167	0.043775	-3.84255	Nitrospirae	Nitrospira	Nitrospirales	Nitrospiraceae	Nitrospira	B5912_Nitrospira	Not_predicted	Non-fer
[truncated: 6,058 more rows]

## Sheet: Nutrient-poor_Arch
OTU	logFC	AveExpr	t	P.Value	adj.P.Val	B	Phylum	Class	Order	Family	Genus	OTU_id	category	Enriched in
[truncated: 342 more rows]

## Sheet: Nutrient-poor_Fun
OTU	logFC	AveExpr	t	P.Value	adj.P.Val	B	Abun	Phylum	Class	Order	Family	Genus	OTU_id	category	Enriched
[truncated: 2,282 more rows]

[truncated: 3 more sheets: Nutrient-rich_Bac, Nutrient-rich_Arch, Nutrient-rich_Fun]
