# Supplementary material for: Compositional Shift of Bacterial, Archaeal, and Fungal Communities Is Dependent on Trophic Lifestyles in Rice Paddy Soil
Source: Front Microbiol. 2021 Sep 1;12:719486. doi: 10.3389/fmicb.2021.719486 (PMC8440912; doi:10.3389/fmicb.2021.719486)
Supplement: Supplementary file 1 [file Data_Sheet_1.zip › Table 9.XLSX]

## Sheet: Sheet1
Supplementary Table 9. Error rate of random forest models estimated using K-fold cross validation
Nutrient-poor environment							Nutrient-rich environment
Bacteria		Archaea		Fungi			Bacteria		Archaea		Fungi
Number of OTU	Error rate	Number of OTU	Error rate	Number of OTU	Error rate		Number of OTU	Error rate	Number of OTU	Error rate	Number of OTU	Error rate
8046	0	343	0.0416667	2283	0		7970	0.166667	411	0.166667	2637	0.0833333
7241	0.0416667	309	0.0833333	2055	0		7173	0.125	370	0.125	2373	0.0833333
6517	0	278	0.0833333	1849	0.0416667		6456	0.0833333	333	0.166667	2136	0.0833333
5866	0	250	0.0833333	1664	0		5810	0.125	300	0.166667	1922	0.0833333
5279	0	225	0.0416667	1498	0		5229	0.125	270	0.166667	1730	0.0833333
4751	0	203	0.0833333	1348	0		4706	0.125	243	0.166667	1557	0.0833333
4276	0	182	0.0833333	1213	0		4236	0.125	218	0.166667	1401	0.0833333
3848	0	164	0.0833333	1092	0		3812	0.166667	197	0.166667	1261	0.0833333
3464	0	148	0.0416667	983	0		3431	0.125	177	0.166667	1135	0.0833333
3117	0	133	0.0416667	884	0		3088	0.125	159	0.166667	1022	0.125
2805	0	120	0.0416667	796	0		2779	0.0833333	143	0.166667	919	0.0833333
2525	0	108	0.0416667	716	0.0416667		2501	0.125	129	0.166667	828	0.0833333
2272	0	97	0.0416667	645	0		2251	0.0833333	116	0.166667	745	0.0833333
2045	0	87	0.0416667	580	0.0416667		2026	0.0833333	104	0.166667	670	0.0833333
1841	0	78	0.0416667	522	0		1823	0.125	94	0.125	603	0.0833333
1657	0	71	0.0416667	470	0		1641	0.125	85	0.125	543	0.0833333
1491	0	64	0.0416667	423	0		1477	0.125	76	0.166667	489	0.0833333
1342	0	57	0.0416667	381	0		1329	0.125	69	0.0833333	440	0.0833333
1208	0	51	0.0416667	343	0.0416667		1196	0.0833333	62	0.0833333	396	0.0833333
1087	0	46	0.0416667	308	0		1077	0.125	56	0.0833333	356	0.0833333
978	0	42	0.0416667	278	0.0416667		969	0.0833333	50	0.0833333	321	0.0833333
880	0	38	0.0416667	250	0		872	0.0833333	45	0.125	289	0.0833333
792	0	34	0.0416667	225	0.0416667		785	0.0833333	40	0.0833333	260	0.0833333
713	0	30	0.0416667	202	0		706	0.125	36	0.0416667	234	0.0833333
642	0	27	0.0416667	182	0		636	0.0833333	33	0.0833333	210	0.0833333
578	0	25	0	164	0		572	0.0833333	30	0.0833333	189	0.0833333
520	0	22	0.0416667	148	0		515	0.0833333	27	0.0416667	170	0.0833333
468	0	20	0.0416667	133	0		463	0.0833333	24	0.0416667	153	0.0833333
421	0	18	0.0416667	119	0		417	0.0833333	22	0.0833333	138	0.0833333
379	0	16	0	108	0		375	0.0833333	19	0.0416667	124	0.0833333
341	0	15	0.0416667	97	0		338	0.125	17	0.0416667	112	0.0833333
307	0	13	0	87	0.0416667		304	0.0833333	16	0	101	0.0833333
276	0	12	0	78	0		274	0.0833333	14	0.0416667	91	0.0833333
249	0	11	0	71	0.0416667		246	0.0833333	13	0.0416667	81	0.0833333
224	0	10	0	63	0.0416667		222	0.0833333	11	0	73	0.0833333
201	0	9	0	57	0.0416667		200	0.0833333	10	0	66	0.0833333
181	0	8	0	51	0		180	0.0833333	9	0	59	0.0833333
163	0	7	0	46	0		162	0.0833333	8	0	53	0.0833333
147	0	6	0	42	0.0416667		145	0.0833333	7	0	48	0.0833333
132	0	5	0	37	0		131	0.0833333	6	0	43	0.0833333
119	0	4	0	34	0		118	0.0833333	5	0	39	0.0833333
107	0	3	0	30	0		106	0.0833333	4	0	35	0.0833333
96	0	2	0	27	0		95	0.0833333	3	0	32	0.0833333
87	0	1	0	25	0		86	0.0833333	2	0	28	0.0416667
78	0			22	0		77	0.0833333	1	0	26	0.0416667
70	0			20	0		70	0.0833333			23	0.0416667
63	0			18	0		63	0.0833333			21	0.0416667
57	0			16	0		56	0.0833333			19	0.0416667
51	0			15	0		51	0.0833333			17	0.0416667
46	0			13	0		46	0.0833333			15	0.0416667
41	0			12	0		41	0.0833333			14	0.0416667
37	0			11	0		37	0.0833333			12	0.0416667
34	0.0416667			10	0.0416667		33	0.0833333			11	0.0416667
30	0			9	0		30	0.0833333			10	0.0416667
27	0			8	0		27	0.0833333			9	0.0416667
24	0			7	0		24	0.0833333			8	0.0416667
22	0			6	0		22	0.0833333			7	0.0416667
20	0			5	0		20	0.0833333			6	0.0416667
18	0			4	0		18	0.0833333			5	0.0416667
16	0			3	0		16	0.0833333			4	0
14	0			2	0.0833333		14	0.0833333			3	0.0416667
13	0			1	0.125		13	0.0833333			2	0
12	0						12	0.0833333			1	0
11	0.0416667						10	0.0833333
9	0						9	0.0833333
8	0.0416667						8	0.0833333
7	0.0416667						7	0.0833333
6	0						6	0.0416667
5	0						5	0.0416667
4	0.0416667						4	0
3	0.0416667						3	0.0833333
2	0.0416667						2	0.0416667
1	0.166667						1	0
