# Supplementary material for: Compositional Shift of Bacterial, Archaeal, and Fungal Communities Is Dependent on Trophic Lifestyles in Rice Paddy Soil
Source: Front Microbiol. 2021 Sep 1;12:719486. doi: 10.3389/fmicb.2021.719486 (PMC8440912; doi:10.3389/fmicb.2021.719486)
Supplement: Supplementary file 1 [file Data_Sheet_1.zip › Table 10.XLSX]

## Sheet: Content
Supplementary Table 10. Fertilization regime-discriminant OTUs revealed by random forest classfication models in nutrient-poor and -rich environments
Sheet	Content
Nutrient-poor_Bac	Fertilization regime-discriminant OTUs of bacterial community in the nutrient-poor environment
Nutrient-poor_Arch	Fertilization regime-discriminant OTUs of archaeal community in the nutrient-poor environment
Nutrient-poor_Fun	Fertilization regime-discriminant OTUs of fungal community in the nutrient-poor environment
Nutrient-rich_Bac	Fertilization regime-discriminant OTUs of bacterial community in the nutrient-rich environment
Nutrient-rich_Arch	Fertilization regime-discriminant OTUs of archaeal community in the nutrient-rich environment
Nutrient-rich_Fun	Fertilization regime-discriminant OTUs of fungal community in the nutrient-rich environment

## Sheet: Nutrient-poor_Bac
OTU	Abun	Phylum	Class	Order	Family	Genus	Species	MeanDecreaseGini	rank	OTU_id	Enriched
68e14cc9bc39b3c5779787edb0fadff9	6.41346	Firmicutes	Bacilli	Bacillales	#N/A	#N/A	#N/A	0.132758	RF1	B921_o_Bacillales	Non-fer
db05c9a087a158a0739041c6d24fdd9b	8.77028	Chloroflexi	Anaerolineae	Anaerolineales	Anaerolineaceae	uncultured	#N/A	0.128182	RF2	B33_uncultured	Not differential
KF481597.1.1496	6.91274	Acidobacteria	Aminicenantia	Aminicenantales	uncultured Aminicenantes bacterium	uncultured Aminicenantes bacterium	uncultured Aminicenantes bacterium	0.0962811	RF3	B458_uncultured Aminicenantes bacterium	Not differential
DQ836757.1.1415	8.99962	Proteobacteria	Gammaproteobacteria	Betaproteobacteriales	Hydrogenophilaceae	Thiobacillus	#N/A	0.0960048	RF4	B15_Thiobacillus	Not differential
KM267482.1.1491	8.18004	Proteobacteria	Gammaproteobacteria	Betaproteobacteriales	Burkholderiaceae	Massilia	#N/A	0.0889369	RF5	B383_Massilia	Non-fer
JQ245645.1.1418	6.59578	Actinobacteria	Coriobacteriia	FS118-23B-02	uncultured bacterium	uncultured bacterium	uncultured bacterium	0.0856584	RF6	B863_uncultured bacterium	Non-fer
HQ462540.1.1254	9.49085	Actinobacteria	Actinobacteria	Micrococcales	Intrasporangiaceae	Oryzihumus	#N/A	0.0833489	RF7	B54_Oryzihumus	Non-fer
JN417532.1.1488	8.33567	Chloroflexi	Anaerolineae	SJA-15	uncultured soil bacterium	uncultured soil bacterium	uncultured soil bacterium	0.0812322	RF8	B19_uncultured soil bacterium	Not differential
AB426203.1.1437	8.63533	Proteobacteria	Deltaproteobacteria	Syntrophobacterales	Syntrophaceae	Desulfobacca	uncultured Desulfobacca sp.	0.0768347	RF9	B72_Desulfobacca	Non-fer
AB240366.1.1463	9.24174	Chloroflexi	Anaerolineae	RBG-13-54-9	metagenome	metagenome	metagenome	0.0726142	RF10	B20_metagenome	Non-fer
0372557eb82b6cac684075d9c9850998	7.34213	Chloroflexi	Anaerolineae	Anaerolineales	Anaerolineaceae	uncultured	uncultured Chloroflexi bacterium	0.0725032	RF11	B1171_uncultured	Fer
EF018313.1.1387	8.69031	Proteobacteria	Gammaproteobacteria	Xanthomonadales	Rhodanobacteraceae	Rhodanobacter	uncultured Dokdonella sp.	0.0722905	RF12	B143_Rhodanobacter	Non-fer
KU362288.1.1316	8.41892	Actinobacteria	Actinobacteria	Micrococcales	Micrococcaceae	#N/A	#N/A	0.067421	RF13	B185_f_Micrococcaceae	Non-fer
JF429000.1.1537	9.21244	Proteobacteria	Gammaproteobacteria	Xanthomonadales	Rhodanobacteraceae	#N/A	#N/A	0.0658019	RF14	B9_f_Rhodanobacteraceae	Non-fer
KX753105.1.1454	7.20192	Chloroflexi	Gitt-GS-136	#N/A	#N/A	#N/A	#N/A	0.0610202	RF15	B250_o_NA	Not differential
DQ450808.1.1391	9.54467	Nitrospirae	4-29-1	uncultured Nitrospirae bacterium	uncultured Nitrospirae bacterium	uncultured Nitrospirae bacterium	uncultured Nitrospirae bacterium	0.0596648	RF16	B14_uncultured Nitrospirae bacterium	Non-fer
KP636161.1.1512	6.51175	Verrucomicrobia	Verrucomicrobiae	Opitutales	Opitutaceae	Lacunisphaera	#N/A	0.0594515	RF17	B935_Lacunisphaera	Not differential
bd55b8ddbfb0c66ac60a5b0d96483775	7.23993	Bacteroidetes	Bacteroidia	Chitinophagales	Chitinophagaceae	uncultured	Chitinophaga sp. BN130233	0.0588829	RF18	B423_uncultured	Not differential
KF515264.1.1459	9.21044	Chloroflexi	Anaerolineae	RBG-13-54-9	uncultured prokaryote	uncultured prokaryote	uncultured prokaryote	0.0585054	RF19	B3_uncultured prokaryote	Non-fer
KC424712.1.1516	8.17976	Bacteroidetes	Bacteroidia	Bacteroidales	Bacteroidetes vadinHA17	uncultured prokaryote	uncultured prokaryote	0.0569177	RF20	B49_uncultured prokaryote	Non-fer
KM205530.1.1438	7.17472	Gemmatimonadetes	Gemmatimonadetes	Gemmatimonadales	Gemmatimonadaceae	uncultured	#N/A	0.0554713	RF21	B343_uncultured	Fer
KR857366.1.1379	8.8323	Actinobacteria	Actinobacteria	Micrococcales	Microbacteriaceae	Cryobacterium	#N/A	0.0549518	RF22	B186_Cryobacterium	Non-fer
HM243889.1.1474	7.57405	Bacteroidetes	Bacteroidia	Bacteroidales	Prolixibacteraceae	uncultured	uncultured soil bacterium	0.054813	RF23	B154_uncultured	Non-fer
2c3cb34f4d79c7a9164bc7bb582ba3a2	6.58341	Chloroflexi	Anaerolineae	SBR1031	uncultured bacterium	uncultured bacterium	uncultured bacterium	0.0536909	RF24	B592_uncultured bacterium	Non-fer
FPLP01002637.3.1464	7.43071	Proteobacteria	Gammaproteobacteria	Betaproteobacteriales	SC-I-84	#N/A	#N/A	0.0535044	RF25	B79_f_SC-I-84	Fer
CU466773.2.1368	6.66568	Proteobacteria	Deltaproteobacteria	Myxococcales	uncultured	uncultured delta proteobacterium	uncultured delta proteobacterium	0.0509444	RF26	B584_uncultured delta proteobacterium	Not differential
EF018446.1.1369	8.41294	Gemmatimonadetes	Gemmatimonadetes	Gemmatimonadales	Gemmatimonadaceae	uncultured	#N/A	0.0508713	RF27	B98_uncultured	Non-fer
AB240231.1.1447	9.17502	Chloroflexi	OLB14	uncultured bacterium	uncultured bacterium	uncultured bacterium	uncultured bacterium	0.0490946	RF28	B22_uncultured bacterium	Non-fer
AB714001.1.1404	5.9162	Firmicutes	Clostridia	Clostridiales	Lachnospiraceae	#N/A	#N/A	0.0476208	RF29	B1584_f_Lachnospiraceae	Not differential
e64dfecc4e48a525d0d773c6eebd53da	6.78106	Chloroflexi	JG30-KF-CM66	#N/A	#N/A	#N/A	#N/A	0.0474115	RF30	B656_o_NA	Not differential
CP012623.2800921.2802433	5.41165	Bacteroidetes	Bacteroidia	Cytophagales	Hymenobacteraceae	Hymenobacter	Hymenobacter sp. DG25A	0.0469463	RF31	B2422_Hymenobacter	Not differential
HQ330569.1.1357	8.57697	Bacteroidetes	Bacteroidia	Bacteroidales	Bacteroidetes vadinHA17	uncultured Alkaliflexus sp.	uncultured Alkaliflexus sp.	0.0466565	RF32	B44_uncultured Alkaliflexus sp.	Not differential
AM697057.1.1431	7.40123	Chloroflexi	Chloroflexia	Chloroflexales	Roseiflexaceae	uncultured	uncultured Chloroflexaceae bacterium	0.046075	RF33	B216_uncultured	Non-fer
AB672250.1.1470	8.00102	Actinobacteria	Thermoleophilia	Gaiellales	uncultured	#N/A	#N/A	0.0456862	RF34	B51_f_uncultured	Non-fer
EF018572.1.1395	7.01751	Proteobacteria	Gammaproteobacteria	Xanthomonadales	Xanthomonadaceae	uncultured	uncultured Xanthomonadaceae bacterium	0.044557	RF35	B1092_uncultured	Non-fer
LC124606.1.1478	8.42574	Acidobacteria	Holophagae	Subgroup 7	uncultured Acidobacteriales bacterium	uncultured Acidobacteriales bacterium	uncultured Acidobacteriales bacterium	0.0445353	RF36	B92_uncultured Acidobacteriales bacterium	Non-fer
bb689bec0268e89abd050991d0001e1e	5.9428	Chloroflexi	Anaerolineae	SBR1031	uncultured bacterium	uncultured bacterium	uncultured bacterium	0.0421443	RF37	B455_uncultured bacterium	Non-fer
EU335184.1.1526	7.31122	Nitrospirae	4-29-1	uncultured bacterium	uncultured bacterium	uncultured bacterium	uncultured bacterium	0.0398751	RF38	B693_uncultured bacterium	Fer
AY395331.1.1393	5.33754	Gemmatimonadetes	Gemmatimonadetes	Gemmatimonadales	Gemmatimonadaceae	Gemmatimonas	#N/A	0.0390902	RF39	B327_Gemmatimonas	Non-fer
AY118151.1.1480	7.25841	Bacteroidetes	Ignavibacteria	SJA-28	uncultured bacterium	uncultured bacterium	uncultured bacterium	0.0384258	RF40	B153_uncultured bacterium	Not differential
0203f5d5030543a1bf068cef6557dff9	5.57595	Zixibacteria	uncultured delta proteobacterium	uncultured delta proteobacterium	uncultured delta proteobacterium	uncultured delta proteobacterium	uncultured delta proteobacterium	0.0382072	RF41	B1117_uncultured delta proteobacterium	Not differential
EU133650.1.1359	9.16367	Bacteroidetes	Bacteroidia	Chitinophagales	Chitinophagaceae	uncultured	#N/A	0.0377509	RF42	B4_uncultured	Non-fer
HM297893.1.1347	9.51606	Actinobacteria	Actinobacteria	Micrococcales	Intrasporangiaceae	#N/A	#N/A	0.03652	RF43	B59_f_Intrasporangiaceae	Non-fer
JQ919723.1.1348	6.96791	Chloroflexi	Anaerolineae	Anaerolineales	Anaerolineaceae	uncultured	#N/A	0.0358709	RF44	B412_uncultured	Not differential
JF128617.1.1308	6.82437	Proteobacteria	Alphaproteobacteria	Azospirillales	Azospirillaceae	Skermanella	#N/A	0.0356451	RF45	B899_Skermanella	Not differential
FJ592643.1.1378	8.53385	Bacteroidetes	Bacteroidia	Chitinophagales	Saprospiraceae	uncultured	uncultured Haliscomenobacter sp.	0.0355747	RF46	B137_uncultured	Non-fer
GU208439.1.1421	8.25245	Proteobacteria	Gammaproteobacteria	Xanthomonadales	Xanthomonadaceae	Arenimonas	uncultured prokaryote	0.0352138	RF47	B247_Arenimonas	Non-fer
KY121987.1.1436	7.39511	Proteobacteria	Alphaproteobacteria	Rhizobiales	Beijerinckiaceae	Rhodoblastus	Rhodoblastus sp.	0.0350356	RF48	B805_Rhodoblastus	Fer
EF492900.1.1488	5.11799	Gemmatimonadetes	Gemmatimonadetes	Gemmatimonadales	Gemmatimonadaceae	Gemmatimonas	#N/A	0.0348662	RF49	B612_Gemmatimonas	Not differential
DQ404825.1.1518	9.16534	Proteobacteria	Gammaproteobacteria	Betaproteobacteriales	Nitrosomonadaceae	GOUTA6	#N/A	0.0345958	RF50	B12_GOUTA6	Non-fer
KM287502.1.1416	7.85709	Proteobacteria	Gammaproteobacteria	Betaproteobacteriales	Burkholderiaceae	uncultured	#N/A	0.034178	RF51	B358_uncultured	Not differential
HQ462515.1.1309	7.67183	Proteobacteria	Deltaproteobacteria	Desulfuromonadales	Geobacteraceae	Geobacter	uncultured Desulfuromonadales bacterium	0.0339509	RF52	B114_Geobacter	Not differential
EF019237.1.1345	8.08456	Chloroflexi	Dehalococcoidia	S085	#N/A	#N/A	#N/A	0.0339354	RF53	B101_o_S085	Non-fer
KM205527.1.1424	6.51323	Chloroflexi	Anaerolineae	SBR1031	uncultured soil bacterium	uncultured soil bacterium	uncultured soil bacterium	0.0338586	RF54	B1682_uncultured soil bacterium	Fer
f12b40867c90dee9225e2c643fd0ce95	5.63835	Acidobacteria	Subgroup 6	#N/A	#N/A	#N/A	#N/A	0.0333346	RF55	B1405_o_NA	Not differential
MGQB01000003.898.2462	7.92262	Proteobacteria	Deltaproteobacteria	Syntrophobacterales	Syntrophobacteraceae	uncultured	Deltaproteobacteria bacterium RBG_13_43_22	0.0328899	RF56	B90_uncultured	Non-fer
EF018497.1.1361	7.16627	Chloroflexi	AD3	uncultured Thermoflavimicrobium sp.	uncultured Thermoflavimicrobium sp.	uncultured Thermoflavimicrobium sp.	uncultured Thermoflavimicrobium sp.	0.0328115	RF57	B58_uncultured Thermoflavimicrobium sp.	Not differential
KP992878.1.1271	7.76387	Proteobacteria	Alphaproteobacteria	Rhizobiales	Rhizobiaceae	Mesorhizobium	#N/A	0.0326784	RF58	B256_Mesorhizobium	Non-fer
KP717958.1.1215	7.35052	Actinobacteria	Actinobacteria	Micrococcales	Micrococcaceae	#N/A	#N/A	0.0320006	RF59	B102_f_Micrococcaceae	Not differential
AJ863370.1.1411	8.63622	Proteobacteria	Alphaproteobacteria	Sphingomonadales	Sphingomonadaceae	Porphyrobacter	#N/A	0.0313364	RF60	B103_Porphyrobacter	Not differential
EU134197.1.1315	8.22336	Chloroflexi	KD4-96	uncultured bacterium	uncultured bacterium	uncultured bacterium	uncultured bacterium	0.0312223	RF61	B60_uncultured bacterium	Non-fer
EF516799.1.1402	8.58597	Acidobacteria	Acidobacteriia	Solibacterales	Solibacteraceae (Subgroup 3)	Bryobacter	#N/A	0.0304808	RF62	B46_Bryobacter	Non-fer
KC172206.1.1504	9.57311	Proteobacteria	Gammaproteobacteria	Xanthomonadales	Xanthomonadaceae	Luteimonas	#N/A	0.0294684	RF63	B8_Luteimonas	Non-fer
HM263160.1.1366	6.23637	Actinobacteria	Thermoleophilia	Solirubrobacterales	Solirubrobacteraceae	Conexibacter	#N/A	0.0294592	RF64	B1036_Conexibacter	Non-fer
KJ782733.1.1514	5.7462	Acidobacteria	Blastocatellia (Subgroup 4)	DS-100	uncultured bacterium	uncultured bacterium	uncultured bacterium	0.029214	RF65	B1327_uncultured bacterium	Not differential
d2af91f96dfc4d692ddc46acbe4124b9	7.24637	Latescibacteria	uncultured bacterium mle1-16	uncultured bacterium mle1-16	uncultured bacterium mle1-16	uncultured bacterium mle1-16	uncultured bacterium mle1-16	0.0286899	RF66	B716_uncultured bacterium mle1-16	Fer
FQ658557.1.1361	7.85166	Bacteroidetes	Bacteroidia	Chitinophagales	Chitinophagaceae	Ferruginibacter	uncultured soil bacterium	0.0285564	RF67	B525_Ferruginibacter	Not differential
AB238766.1.1444	7.12367	Nitrospirae	Thermodesulfovibrionia	uncultured	uncultured bacterium	uncultured bacterium	uncultured bacterium	0.028515	RF68	B313_uncultured bacterium	Non-fer
AY571791.1.1424	8.55333	Acidobacteria	Blastocatellia (Subgroup 4)	Blastocatellales	Blastocatellaceae	#N/A	#N/A	0.0279534	RF69	B45_f_Blastocatellaceae	Not differential
JF266532.1.1357	8.01764	Proteobacteria	Gammaproteobacteria	Betaproteobacteriales	SC-I-84	#N/A	#N/A	0.0276064	RF70	B212_f_SC-I-84	Non-fer
1959230c7461d25c73657d8f7aaaa3c0	6.23832	Bacteroidetes	Ignavibacteria	Ignavibacteriales	BSV40	uncultured Chlorobiales bacterium	uncultured Chlorobiales bacterium	0.0275993	RF71	B933_uncultured Chlorobiales bacterium	Not differential
846e816922cb2dc79fbbd18371ebb496	6.14847	Chloroflexi	Anaerolineae	#N/A	#N/A	#N/A	#N/A	0.0274773	RF72	B1723_o_NA	Non-fer
b24dcb12d51d590a0f83b15ba55a008c	7.73456	Nitrospirae	4-29-1	uncultured proteobacterium	uncultured proteobacterium	uncultured proteobacterium	uncultured proteobacterium	0.0273965	RF73	B223_uncultured proteobacterium	Not differential
e7ab848bba8c4b3df37a8bf6e2773fbd	7.92081	Chloroflexi	Anaerolineae	uncultured Bellilinea sp.	uncultured Bellilinea sp.	uncultured Bellilinea sp.	uncultured Bellilinea sp.	0.0272949	RF74	B163_uncultured Bellilinea sp.	Not differential
JF167700.1.1305	7.87474	Proteobacteria	Alphaproteobacteria	Rhizobiales	Hyphomicrobiaceae	Hyphomicrobium	#N/A	0.0272062	RF75	B280_Hyphomicrobium	Non-fer
AB240374.1.1507	6.71296	Gemmatimonadetes	Gemmatimonadetes	Gemmatimonadales	Gemmatimonadaceae	uncultured	#N/A	0.0264383	RF76	B362_uncultured	Not differential
JF319215.1.1375	4.45435	Bacteroidetes	Bacteroidia	Sphingobacteriales	AKYH767	#N/A	#N/A	0.0258489	RF77	B5088_f_AKYH767	Not differential
KY190585.1.1447	7.68386	Gemmatimonadetes	Gemmatimonadetes	Gemmatimonadales	Gemmatimonadaceae	Gemmatimonas	metagenome	0.0257614	RF78	B127_Gemmatimonas	Non-fer
KX753186.1.1480	6.79347	Proteobacteria	Gammaproteobacteria	Xanthomonadales	Rhodanobacteraceae	Rhodanobacter	uncultured Xanthomonadaceae bacterium	0.0257214	RF79	B235_Rhodanobacter	Non-fer
HQ330581.1.1377	5.2832	Omnitrophicaeota	Omnitrophia	Omnitrophales	Omnitrophaceae	Candidatus Omnitrophus	uncultured prokaryote	0.0256701	RF80	B2929_Candidatus Omnitrophus	Not differential
0454748e057e5f1b2af8be8b51ae7c38	7.22911	Gemmatimonadetes	Gemmatimonadetes	Gemmatimonadales	Gemmatimonadaceae	Gemmatimonas	#N/A	0.0255122	RF81	B251_Gemmatimonas	Not differential
ff6bbf118c03a099016eca2291f9ec07	7.24637	Chloroflexi	Anaerolineae	SBR1031	#N/A	#N/A	#N/A	0.0252489	RF82	B386_o_SBR1031	Fer
KP762234.1.1263	7.31455	Actinobacteria	Actinobacteria	Micrococcales	Micrococcaceae	#N/A	#N/A	0.0252237	RF83	B42_f_Micrococcaceae	Not differential
JX222097.1.1289	7.2086	Actinobacteria	Actinobacteria	Micrococcales	Micrococcaceae	#N/A	#N/A	0.0249207	RF84	B115_f_Micrococcaceae	Not differential
KF469195.1.1450	4.89784	Proteobacteria	Gammaproteobacteria	Salinisphaerales	Solimonadaceae	Nevskia	uncultured Nevskia sp.	0.0247601	RF85	B2230_Nevskia	Not differential
JF193804.1.1376	6.38856	Proteobacteria	Deltaproteobacteria	Myxococcales	Sandaracinaceae	uncultured	#N/A	0.0245386	RF86	B1264_uncultured	Not differential
AM157329.1.1204	7.48156	Gemmatimonadetes	Gemmatimonadetes	Gemmatimonadales	Gemmatimonadaceae	uncultured	#N/A	0.0242781	RF87	B725_uncultured	Fer
AB672136.1.1423	7.49942	Acidobacteria	Acidobacteriia	Acidobacteriales	uncultured	#N/A	#N/A	0.0241267	RF88	B47_f_uncultured	Non-fer
DQ058674.1.1514	7.86442	Nitrospirae	Nitrospira	Nitrospirales	Nitrospiraceae	Nitrospira	#N/A	0.023976	RF89	B118_Nitrospira	Non-fer
FPLL01003168.16.1552	7.45472	Proteobacteria	Deltaproteobacteria	Myxococcales	Sandaracinaceae	uncultured	uncultured soil bacterium	0.0239066	RF90	B571_uncultured	Not differential
DQ413121.1.1404	6.53814	Chloroflexi	Anaerolineae	RBG-13-54-9	#N/A	#N/A	#N/A	0.0232434	RF91	B1201_o_RBG-13-54-9	Not differential
KJ808093.1.1493	5.70044	Proteobacteria	Deltaproteobacteria	Myxococcales	Nannocystaceae	Nannocystis	metagenome	0.0230229	RF92	B2853_Nannocystis	Not differential
KJ192002.1.1494	8.06149	Proteobacteria	Gammaproteobacteria	Betaproteobacteriales	A21b	uncultured Rhodocyclaceae bacterium	uncultured Rhodocyclaceae bacterium	0.0226526	RF93	B246_uncultured Rhodocyclaceae bacterium	Not differential
EF494371.1.1478	7.37526	Actinobacteria	Acidimicrobiia	IMCC26256	uncultured Ferrimicrobium sp.	uncultured Ferrimicrobium sp.	uncultured Ferrimicrobium sp.	0.0225948	RF94	B149_uncultured Ferrimicrobium sp.	Not differential
adedee16cb9f5d9a51b846f4ae01c776	5.50126	Chloroflexi	Anaerolineae	#N/A	#N/A	#N/A	#N/A	0.0223915	RF95	B2046_o_NA	Not differential
64e42baf9358c7528508356f43d86b83	7.41638	Proteobacteria	Deltaproteobacteria	Syntrophobacterales	Syntrophobacteraceae	Syntrophobacter	#N/A	0.0221798	RF96	B109_Syntrophobacter	Non-fer
CU925786.1.1382	7.48437	Proteobacteria	Deltaproteobacteria	Deltaproteobacteria Incertae Sedis	Syntrophorhabdaceae	Syntrophorhabdus	uncultured Syntrophorhabdaceae bacterium TA14	0.0219972	RF97	B377_Syntrophorhabdus	Not differential
EU937875.1.1490	8.06527	Bacteroidetes	Bacteroidia	Chitinophagales	Chitinophagaceae	Ferruginibacter	#N/A	0.0219831	RF98	B241_Ferruginibacter	Non-fer
5bc7deb11fe47e51c3e55900b4f788d7	6.36647	Chloroflexi	Anaerolineae	SBR1031	uncultured bacterium	uncultured bacterium	uncultured bacterium	0.0219474	RF99	B607_uncultured bacterium	Not differential
GQ246329.1.1523	5.79909	Nitrospirae	Thermodesulfovibrionia	uncultured	uncultured bacterium	uncultured bacterium	uncultured bacterium	0.0217727	RF100	B1145_uncultured bacterium	Not differential
AB240314.1.1514	7.42237	Proteobacteria	Deltaproteobacteria	RCP2-54	#N/A	#N/A	#N/A	0.0217384	RF101	B95_o_RCP2-54	Non-fer
EF103211.1.1400	7.99632	Bacteroidetes	Bacteroidia	Sphingobacteriales	Sphingobacteriaceae	Pedobacter	Pedobacter sp. MSCB-14	0.0216079	RF102	B328_Pedobacter	Not differential
LC124504.1.1477	7.38771	Chloroflexi	Anaerolineae	SJA-15	#N/A	#N/A	#N/A	0.0213783	RF103	B69_o_SJA-15	Non-fer
89204fed9a79800cb85ee9d315c75418	7.62021	Chloroflexi	Anaerolineae	SJA-15	uncultured bacterium SHD-71	uncultured bacterium SHD-71	uncultured bacterium SHD-71	0.0213443	RF104	B148_uncultured bacterium SHD-71	Not differential
HM243897.1.1510	7.19218	Proteobacteria	Deltaproteobacteria	Deltaproteobacteria Incertae Sedis	Syntrophorhabdaceae	Syntrophorhabdus	uncultured Syntrophorhabdaceae bacterium WCHB1-27	0.020889	RF105	B234_Syntrophorhabdus	Not differential
AB648943.1.1485	6.48768	Actinobacteria	Actinobacteria	Micrococcales	Microbacteriaceae	Agromyces	#N/A	0.0208245	RF106	B1252_Agromyces	Not differential
KC569967.1.1313	4.57471	Proteobacteria	Alphaproteobacteria	uncultured	#N/A	#N/A	#N/A	0.0206849	RF107	B1795_o_uncultured	Not differential
AB240237.1.1458	8.25687	Chloroflexi	JG30-KF-CM66	#N/A	#N/A	#N/A	#N/A	0.0205642	RF108	B88_o_NA	Non-fer
EF019967.1.1344	8.1188	Actinobacteria	Acidimicrobiia	Microtrichales	uncultured	uncultured Iamiaceae bacterium	uncultured Iamiaceae bacterium	0.0203656	RF109	B139_uncultured Iamiaceae bacterium	Non-fer
a3d90261761fb6b9c255f00b39231129	7.28688	Actinobacteria	Acidimicrobiia	Microtrichales	Ilumatobacteraceae	uncultured	#N/A	0.0197546	RF110	B410_uncultured	Fer
AY425764.1.1406	7.98207	Proteobacteria	Alphaproteobacteria	Reyranellales	Reyranellaceae	Reyranella	#N/A	0.0197515	RF111	B116_Reyranella	Not differential
75356a8a9473e99e944fa09d01e280eb	7.32975	Chloroflexi	Anaerolineae	Anaerolineales	Anaerolineaceae	uncultured	uncultured Chloroflexi bacterium	0.0196432	RF112	B553_uncultured	Not differential
EU677401.1.1355	6.63726	Chloroflexi	Chloroflexia	Chloroflexales	Roseiflexaceae	uncultured	uncultured bacterium	0.0196088	RF113	B355_uncultured	Not differential
AB748641.1.1460	8.66974	Proteobacteria	Gammaproteobacteria	Betaproteobacteriales	Gallionellaceae	Sideroxydans	#N/A	0.0194761	RF114	B5_Sideroxydans	Fer
13e5508273ef0ba1b9ffc7f754ff694e	6.88653	TA06	uncultured bacterium	uncultured bacterium	uncultured bacterium	uncultured bacterium	uncultured bacterium	0.0194496	RF115	B574_uncultured bacterium	Not differential
HM341127.1.1337	8.00703	Actinobacteria	Acidimicrobiia	IMCC26256	uncultured Ferrimicrobium sp.	uncultured Ferrimicrobium sp.	uncultured Ferrimicrobium sp.	0.0194211	RF116	B117_uncultured Ferrimicrobium sp.	Not differential
d3bc4cc6f4d9b0d884bf93db9d792ec0	6.17587	Gemmatimonadetes	Gemmatimonadetes	Gemmatimonadales	Gemmatimonadaceae	Gemmatimonas	#N/A	0.0194072	RF117	B261_Gemmatimonas	Non-fer
DQ138957.1.1512	8.99417	Proteobacteria	Deltaproteobacteria	Desulfuromonadales	Geobacteraceae	Geobacter	#N/A	0.0191275	RF118	B53_Geobacter	Not differential
KY445660.1.1519	7.43838	Actinobacteria	Actinobacteria	Micrococcales	Micrococcaceae	#N/A	#N/A	0.0190394	RF119	B107_f_Micrococcaceae	Not differential
AM935626.1.1356	7.29302	Proteobacteria	Gammaproteobacteria	Steroidobacterales	Steroidobacteraceae	uncultured	uncultured Methylococcaceae bacterium	0.0189165	RF120	B299_uncultured	Not differential
JQ427682.1.1489	5.50939	Proteobacteria	Gammaproteobacteria	Cellvibrionales	Cellvibrionaceae	Cellvibrio	uncultured gamma proteobacterium	0.018797	RF121	B4010_Cellvibrio	Not differential
777aa23841181046ee1b2a2caf4db360	5.85507	Planctomycetes	Phycisphaerae	MSBL9	GWC2-45-44	uncultured soil bacterium	uncultured soil bacterium	0.0187427	RF122	B1726_uncultured soil bacterium	Not differential
HQ120333.1.1393	6.3699	Proteobacteria	Alphaproteobacteria	Sphingomonadales	Sphingomonadaceae	Altererythrobacter	#N/A	0.0186274	RF123	B2235_Altererythrobacter	Not differential
3f685624778b294642ff5ece88a5ec2c	4.91998	Chloroflexi	Ktedonobacteria	C0119	uncultured bacterium	uncultured bacterium	uncultured bacterium	0.0184714	RF124	B991_uncultured bacterium	Not differential
AY921917.1.1380	6.40192	Actinobacteria	Acidimicrobiia	Microtrichales	Ilumatobacteraceae	uncultured	uncultured soil bacterium	0.0182393	RF125	B1106_uncultured	Non-fer
KX504792.1.1532	7.72489	Rokubacteria	NC10	Methylomirabilales	Methylomirabilaceae	Sh765B-TzT-35	uncultured soil bacterium	0.0181973	RF126	B254_Sh765B-TzT-35	Not differential
DQ125664.1.1451	8.51959	Actinobacteria	Actinobacteria	Micrococcales	Micrococcaceae	#N/A	#N/A	0.0181547	RF127	B150_f_Micrococcaceae	Non-fer
AB252886.1.1502	9.10609	Proteobacteria	Gammaproteobacteria	Steroidobacterales	Steroidobacteraceae	uncultured	uncultured gamma proteobacterium	0.0181442	RF128	B23_uncultured	Non-fer
HQ729897.1.1472	5.63835	Acidobacteria	Subgroup 11	uncultured Acidobacteria bacterium	uncultured Acidobacteria bacterium	uncultured Acidobacteria bacterium	uncultured Acidobacteria bacterium	0.0180765	RF129	B762_uncultured Acidobacteria bacterium	Not differential
ca3cc77996e50fc6736121e701140076	3.29584	Proteobacteria	Deltaproteobacteria	Syntrophobacterales	Syntrophaceae	uncultured	Myxococcales bacterium enrichment culture clone 11380	0.0180251	RF130	B12543_uncultured	Not differential
KR095243.1.1546	6.24028	Kiritimatiellaeota	Kiritimatiellae	WCHB1-41	uncultured soil bacterium PBS-III-20	uncultured soil bacterium PBS-III-20	uncultured soil bacterium PBS-III-20	0.0176823	RF131	B930_uncultured soil bacterium PBS-III-20	Non-fer
KY287319.1.1489	9.10342	Nitrospirae	Thermodesulfovibrionia	uncultured	uncultured prokaryote	uncultured prokaryote	uncultured prokaryote	0.0174143	RF132	B2_uncultured prokaryote	Non-fer
JX133563.1.1453	7.77444	Gemmatimonadetes	Gemmatimonadetes	Gemmatimonadales	Gemmatimonadaceae	uncultured	#N/A	0.0171938	RF133	B291_uncultured	Fer
AZUN01000001.2395004.2396518	8.18702	Proteobacteria	Gammaproteobacteria	Methylococcales	Methylomonaceae	#N/A	#N/A	0.0167248	RF134	B192_f_Methylomonaceae	Not differential
JQ710442.1.1403	5.70378	Proteobacteria	Gammaproteobacteria	Salinisphaerales	Solimonadaceae	Nevskia	#N/A	0.0166462	RF135	B2598_Nevskia	Not differential
a23b8a2c6caff3f7d96962a448fce578	4.74493	Proteobacteria	Deltaproteobacteria	Desulfovibrionales	Desulfovibrionaceae	Desulfovibrio	Desulfovibrio sp. L21-Syr-AB	0.0164326	RF136	B2538_Desulfovibrio	Fer
GQ263797.1.1435	5.53733	Chloroflexi	Anaerolineae	SBR1031	A4b	uncultured bacterium	uncultured bacterium	0.0164235	RF137	B1006_uncultured bacterium	Not differential
8ba8d322ed52b6463f050af440271cf6	5.70044	Omnitrophicaeota	uncultured bacterium	uncultured bacterium	uncultured bacterium	uncultured bacterium	uncultured bacterium	0.0163818	RF138	B2860_uncultured bacterium	Not differential
JF175337.1.1357	6.35784	Bacteroidetes	Bacteroidia	Chitinophagales	Chitinophagaceae	Terrimonas	#N/A	0.0161961	RF139	B845_Terrimonas	Not differential
210a867bd2eb0d42a7cbde6b950f1546	6.11147	Chloroflexi	Anaerolineae	Anaerolineales	Anaerolineaceae	uncultured	uncultured Anaerolineaceae bacterium	0.0160589	RF140	B676_uncultured	Fer
AB179503.1.1499	5.27811	Proteobacteria	Gammaproteobacteria	Salinisphaerales	Solimonadaceae	Polycyclovorans	uncultured bacterium	0.0159094	RF141	B1192_Polycyclovorans	Non-fer
KJ192083.1.1494	7.45876	Bacteroidetes	Bacteroidia	Chitinophagales	Chitinophagaceae	Terrimonas	#N/A	0.0158899	RF142	B323_Terrimonas	Fer
58f2b3c712bfa98f8d269e9b652cfe58	7.11477	Chloroflexi	NLS2-31	uncultured bacterium	uncultured bacterium	uncultured bacterium	uncultured bacterium	0.0158858	RF143	B317_uncultured bacterium	Not differential
JQ678526.1.1509	5.73657	Proteobacteria	Deltaproteobacteria	Desulfobacterales	Desulfobulbaceae	#N/A	#N/A	0.0158208	RF144	B890_f_Desulfobulbaceae	Fer
DQ138964.1.1518	7.56164	Nitrospirae	4-29-1	uncultured bacterium	uncultured bacterium	uncultured bacterium	uncultured bacterium	0.0155999	RF145	B132_uncultured bacterium	Fer
EU266783.1.1493	6.91175	Proteobacteria	Gammaproteobacteria	Acidiferrobacterales	Acidiferrobacteraceae	Sulfurifustis	uncultured Thiotrichaceae bacterium	0.0155475	RF146	B214_Sulfurifustis	Not differential
JN397739.1.1458	9.33362	Proteobacteria	Gammaproteobacteria	Betaproteobacteriales	SC-I-84	#N/A	#N/A	0.0154896	RF147	B11_f_SC-I-84	Non-fer
AJ582031.1.1400	7.60788	Proteobacteria	Alphaproteobacteria	Caulobacterales	Caulobacteraceae	Phenylobacterium	Phenylobacterium sp.	0.0152568	RF148	B176_Phenylobacterium	Not differential
KF712570.1.1517	3.89182	Gemmatimonadetes	Gemmatimonadetes	Gemmatimonadales	Gemmatimonadaceae	uncultured	uncultured actinobacterium	0.0152399	RF149	B2926_uncultured	Not differential
DQ451520.1.1487	6.90073	Proteobacteria	Gammaproteobacteria	Steroidobacterales	Steroidobacteraceae	uncultured	Hypsibius dujardini	0.0151329	RF150	B497_uncultured	Not differential
487d488eca619cf8369da4e9137eea59	4.77068	Bacteroidetes	Ignavibacteria	SJA-28	#N/A	#N/A	#N/A	0.0149906	RF151	B2206_o_SJA-28	Not differential
JF265691.1.1384	4.96981	Rokubacteria	NC10	Rokubacteriales	uncultured candidate division SPAM bacterium	uncultured candidate division SPAM bacterium	uncultured candidate division SPAM bacterium	0.0149886	RF152	B301_uncultured candidate division SPAM bacterium	Non-fer
DQ450727.1.1290	5.26786	Chloroflexi	TK10	bacterium Ellin6543	bacterium Ellin6543	bacterium Ellin6543	bacterium Ellin6543	0.0149773	RF153	B709_bacterium Ellin6543	Not differential
AB240352.1.1493	7.13648	Bacteroidetes	Ignavibacteria	Ignavibacteriales	Ignavibacteriaceae	Ignavibacterium	uncultured bacterium	0.0147658	RF154	B202_Ignavibacterium	Not differential
c85a64b98f69856df38b4e1ff4601e6f	4.58497	Chloroflexi	Anaerolineae	Anaerolineales	Anaerolineaceae	uncultured	#N/A	0.0146298	RF155	B3095_uncultured	Not differential
035912e7874635f19ba29bd20736a555	4.96981	Chloroflexi	Ktedonobacteria	Ktedonobacterales	JG30-KF-AS9	uncultured bacterium	uncultured bacterium	0.0146026	RF156	B2977_uncultured bacterium	Non-fer
AY133074.1.1424	6.31173	Elusimicrobia	Elusimicrobia	Lineage IV	uncultured Termite group 1 bacterium	uncultured Termite group 1 bacterium	uncultured Termite group 1 bacterium	0.0145363	RF157	B822_uncultured Termite group 1 bacterium	Not differential
EU133709.1.1380	7.0193	Bacteroidetes	Bacteroidia	Chitinophagales	Chitinophagaceae	Terrimonas	#N/A	0.0143815	RF158	B871_Terrimonas	Fer
HM270072.1.1359	6.71174	Proteobacteria	Gammaproteobacteria	Gammaproteobacteria Incertae Sedis	Unknown Family	Acidibacter	#N/A	0.0143418	RF159	B973_Acidibacter	Non-fer
AM411905.1.1378	8.10319	Proteobacteria	Alphaproteobacteria	Sphingomonadales	Sphingomonadaceae	Sphingomonas	Sphingomonas sp. P-54	0.0143173	RF160	B168_Sphingomonas	Not differential
EF516277.1.1264	6.49527	Bacteroidetes	Bacteroidia	Sphingobacteriales	AKYH767	metagenome	metagenome	0.014258	RF161	B752_metagenome	Not differential
4392dc1e40794b020160600d8968350d	4.58497	Omnitrophicaeota	Omnitrophica WOR_2 bacterium RIFCSPLOWO2_12_FULL_51_24	Omnitrophica WOR_2 bacterium RIFCSPLOWO2_12_FULL_51_24	Omnitrophica WOR_2 bacterium RIFCSPLOWO2_12_FULL_51_24	Omnitrophica WOR_2 bacterium RIFCSPLOWO2_12_FULL_51_24	Omnitrophica WOR_2 bacterium RIFCSPLOWO2_12_FULL_51_24	0.0141306	RF162	B3098_Omnitrophica WOR_2 bacterium RIFCSPLOWO2_12_FULL_51_24	Not differential
f48392da1e953275f051eb54dc3e6037	5.36598	WOR-1	#N/A	#N/A	#N/A	#N/A	#N/A	0.014068	RF163	B2125_o_NA	Fer
HM274460.1.1355	4.44265	Proteobacteria	Deltaproteobacteria	Oligoflexales	Oligoflexaceae	Oligoflexus	Thymallus thymallus (grayling)	0.0140072	RF164	B5564_Oligoflexus	Fer
GQ844387.1.1303	5.4161	Epsilonbacteraeota	Campylobacteria	Campylobacterales	Thiovulaceae	Sulfuricurvum	#N/A	0.0139903	RF165	B2836_Sulfuricurvum	Not differential
EU134601.1.1387	5.86363	Elusimicrobia	Lineage IIa	#N/A	#N/A	#N/A	#N/A	0.0138968	RF166	B834_o_NA	Non-fer
cc03b165582d509db5dfc98edc91285d	7.99665	Chloroflexi	Anaerolineae	RBG-13-54-9	uncultured bacterium	uncultured bacterium	uncultured bacterium	0.013893	RF167	B273_uncultured bacterium	Non-fer
EF018568.1.1385	7.55956	Proteobacteria	Gammaproteobacteria	Betaproteobacteriales	Nitrosomonadaceae	Ellin6067	#N/A	0.0138022	RF168	B627_Ellin6067	Fer
AM930318.1.1511	5.22036	Firmicutes	Bacilli	Bacillales	Bacillaceae	#N/A	#N/A	0.0137074	RF169	B4957_f_Bacillaceae	Fer
3fe9667f06552efbfcca17d22ff123ed	6.47543	Gemmatimonadetes	S0134 terrestrial group	uncultured bacterium	uncultured bacterium	uncultured bacterium	uncultured bacterium	0.0135577	RF170	B967_uncultured bacterium	Fer
HQ597086.1.1507	5.87493	Acidobacteria	Blastocatellia (Subgroup 4)	DS-100	#N/A	#N/A	#N/A	0.0135204	RF171	B1077_o_DS-100	Not differential
EF018409.1.1451	7.76132	Proteobacteria	Gammaproteobacteria	Betaproteobacteriales	SC-I-84	uncultured Burkholderiaceae bacterium	uncultured Burkholderiaceae bacterium	0.0134153	RF172	B120_uncultured Burkholderiaceae bacterium	Non-fer
KC683035.1.1496	6.72743	Chloroflexi	Anaerolineae	Caldilineales	Caldilineaceae	uncultured	#N/A	0.0133661	RF173	B424_uncultured	Not differential
146d3d3e739a6325a9a740a02f2d853c	6.1717	Bacteroidetes	Ignavibacteria	Kryptoniales	BSV26	uncultured bacterium	uncultured bacterium	0.0133458	RF174	B664_uncultured bacterium	Not differential
DQ128633.1.1442	5.65249	Patescibacteria	Saccharimonadia	Saccharimonadales	uncultured soil bacterium	uncultured soil bacterium	uncultured soil bacterium	0.0133032	RF175	B989_uncultured soil bacterium	Not differential
f1b1622e50b6234b08822f9eccb383b1	6.46459	Latescibacteria	uncultured bacterium	uncultured bacterium	uncultured bacterium	uncultured bacterium	uncultured bacterium	0.0132872	RF176	B552_uncultured bacterium	Not differential
664546340e25eeb18d494ad081e8d3c8	7.6029	Chloroflexi	Anaerolineae	RBG-13-54-9	uncultured eubacterium WCHB1-50	uncultured eubacterium WCHB1-50	uncultured eubacterium WCHB1-50	0.0132678	RF177	B425_uncultured eubacterium WCHB1-50	Fer
92c2636eb9d6d3f7a83863d0b72353d5	5.76519	#N/A	#N/A	#N/A	#N/A	#N/A	#N/A	0.013251	RF178	B1705_o_NA	Non-fer
KF494798.1.1496	8.9482	Actinobacteria	Actinobacteria	Micrococcales	Micrococcaceae	#N/A	#N/A	0.0132443	RF179	B50_f_Micrococcaceae	Fer
FJ902364.1.1389	6.97167	Proteobacteria	Deltaproteobacteria	Syntrophobacterales	Syntrophaceae	uncultured	uncultured Smithella sp.	0.0132068	RF180	B286_uncultured	Not differential
KX504934.1.1513	6.06843	Zixibacteria	uncultured delta proteobacterium	uncultured delta proteobacterium	uncultured delta proteobacterium	uncultured delta proteobacterium	uncultured delta proteobacterium	0.0131882	RF181	B1071_uncultured delta proteobacterium	Not differential
b1e10e6368642ffac7a9e970d91295f1	5.97635	Proteobacteria	Deltaproteobacteria	SAR324 clade(Marine group B)	uncultured bacterium	uncultured bacterium	uncultured bacterium	0.0131577	RF182	B1498_uncultured bacterium	Not differential
EF020275.1.1401	6.286	Acidobacteria	Blastocatellia (Subgroup 4)	Elev-16S-573	uncultured proteobacterium	uncultured proteobacterium	uncultured proteobacterium	0.0130991	RF183	B706_uncultured proteobacterium	Not differential
HM243805.1.1524	3.98898	Rokubacteria	NC10	Methylomirabilales	Methylomirabilaceae	Z114MB74	uncultured bacterium	0.013035	RF184	B3002_Z114MB74	Not differential
JX505016.1.1422	9.0153	Chloroflexi	KD4-96	uncultured Anaerolineaceae bacterium	uncultured Anaerolineaceae bacterium	uncultured Anaerolineaceae bacterium	uncultured Anaerolineaceae bacterium	0.0129664	RF185	B35_uncultured Anaerolineaceae bacterium	Not differential
b90e949827c0307ba8b941b392224130	5.7462	Proteobacteria	Gammaproteobacteria	Acidiferrobacterales	Acidiferrobacteraceae	uncultured	uncultured bacterium	0.0128583	RF186	B1922_uncultured	Fer
DQ833505.1.1532	6.11147	Proteobacteria	Gammaproteobacteria	Betaproteobacteriales	#N/A	#N/A	#N/A	0.0128324	RF187	B468_o_Betaproteobacteriales	Not differential
80957ff7d243e147cdb2f8f18a598bce	5.49717	Bacteroidetes	Ignavibacteria	Kryptoniales	BSV26	uncultured bacterium	uncultured bacterium	0.0128224	RF188	B1971_uncultured bacterium	Not differential
HM341137.1.1357	7.50439	Bacteroidetes	Bacteroidia	Chitinophagales	Chitinophagaceae	Ferruginibacter	uncultured Ferruginibacter sp.	0.0128056	RF189	B274_Ferruginibacter	Not differential
MELV01000092.30793.32327	7.55276	Actinobacteria	MB-A2-108	Actinobacteria bacterium RBG_19FT_COMBO_70_19	Actinobacteria bacterium RBG_19FT_COMBO_70_19	Actinobacteria bacterium RBG_19FT_COMBO_70_19	Actinobacteria bacterium RBG_19FT_COMBO_70_19	0.0127667	RF190	B180_Actinobacteria bacterium RBG_19FT_COMBO_70_19	Not differential
KJ461503.1.1467	4.7362	WS2	uncultured bacterium	uncultured bacterium	uncultured bacterium	uncultured bacterium	uncultured bacterium	0.0126683	RF191	B4631_uncultured bacterium	Not differential
07c030ebed511a1ff9d9367ec8b0b757	4.41884	Proteobacteria	Gammaproteobacteria	Diplorickettsiales	Diplorickettsiaceae	uncultured	uncultured bacterium KF-JG30-B15	0.0126189	RF192	B7004_uncultured	Not differential
EF018792.1.1334	7.73674	Proteobacteria	Alphaproteobacteria	Micropepsales	Micropepsaceae	uncultured proteobacterium	uncultured proteobacterium	0.0125734	RF193	B197_uncultured proteobacterium	Not differential
AB672248.1.1444	6.64639	Actinobacteria	MB-A2-108	#N/A	#N/A	#N/A	#N/A	0.0124611	RF194	B668_o_NA	Not differential
KU726278.1.1264	6.11589	Proteobacteria	Alphaproteobacteria	Holosporales	Holosporaceae	uncultured	#N/A	0.0124264	RF195	B1874_uncultured	Not differential
JHVO01000026.12.1514	7.11151	Actinobacteria	Actinobacteria	Frankiales	Geodermatophilaceae	Blastococcus	Geodermatophilaceae bacterium URHB0062	0.0124245	RF196	B126_Blastococcus	Not differential
EU937887.1.1477	5.7589	Bacteroidetes	Ignavibacteria	SJA-28	uncultured bacterium	uncultured bacterium	uncultured bacterium	0.0124048	RF197	B821_uncultured bacterium	Non-fer
JX949389.1.1341	7.0067	Proteobacteria	Gammaproteobacteria	Xanthomonadales	Xanthomonadaceae	Lysobacter	#N/A	0.0123819	RF198	B1573_Lysobacter	Not differential
EU399670.1.1496	6.84482	Proteobacteria	Deltaproteobacteria	Desulfobacterales	Desulfobacteraceae	Sva0081 sediment group	#N/A	0.012368	RF199	B550_Sva0081 sediment group	Not differential
HM273154.1.1280	5.73334	Proteobacteria	Alphaproteobacteria	Caulobacterales	Caulobacteraceae	Asticcacaulis	uncultured Asticcacaulis sp.	0.0123455	RF200	B2387_Asticcacaulis	Fer
AB364795.1.1423	8.66389	Acidobacteria	Acidobacteriia	Acidobacteriales	uncultured	#N/A	#N/A	0.0123366	RF201	B104_f_uncultured	Not differential
AY947996.1.1387	6.83303	Proteobacteria	Alphaproteobacteria	Rhodobacterales	Rhodobacteraceae	Rhodobacter	Rhodobacter sp. 7B-409	0.0123343	RF202	B1378_Rhodobacter	Non-fer
EF019280.1.1362	5.3845	Proteobacteria	Gammaproteobacteria	Betaproteobacteriales	TRA3-20	#N/A	#N/A	0.0123088	RF203	B2899_f_TRA3-20	Not differential
FQ659358.1.1356	8.00001	Bacteroidetes	Bacteroidia	Bacteroidales	Bacteroidetes vadinHA17	#N/A	#N/A	0.0121594	RF204	B245_f_Bacteroidetes vadinHA17	Fer
c30d0f36866c2a08857861cd004ead69	5.50126	Zixibacteria	bacterium enrichment culture clone Anammox_55	bacterium enrichment culture clone Anammox_55	bacterium enrichment culture clone Anammox_55	bacterium enrichment culture clone Anammox_55	bacterium enrichment culture clone Anammox_55	0.0121449	RF205	B1434_bacterium enrichment culture clone Anammox_55	Not differential
7d6d5d28f854ecf714f6d9d1b965b617	5.24702	Chloroflexi	Anaerolineae	SBR1031	uncultured Gemmatimonadetes bacterium	uncultured Gemmatimonadetes bacterium	uncultured Gemmatimonadetes bacterium	0.0121168	RF206	B1580_uncultured Gemmatimonadetes bacterium	Not differential
6a1ce157774e061800e306a4c21f62a1	5.89164	Proteobacteria	Deltaproteobacteria	Myxococcales	mle1-27	Myxococcales bacterium Gsoil 473	Myxococcales bacterium Gsoil 473	0.012017	RF207	B2445_Myxococcales bacterium Gsoil 473	Fer
FPLM01000410.1.1347	7.24566	Chloroflexi	Anaerolineae	SBR1031	A4b	wastewater metagenome	wastewater metagenome	0.011998	RF208	B447_wastewater metagenome	Non-fer
JN417584.1.1525	7.82325	Proteobacteria	Gammaproteobacteria	Betaproteobacteriales	SC-I-84	#N/A	#N/A	0.0119873	RF209	B324_f_SC-I-84	Non-fer
LN563332.1.1318	6.6995	Proteobacteria	Alphaproteobacteria	Rhizobiales	Xanthobacteraceae	uncultured	uncultured Bradyrhizobiaceae bacterium	0.0119632	RF210	B542_uncultured	Not differential
FPLS01038872.15.1434	6.48311	Proteobacteria	Alphaproteobacteria	Caulobacterales	Caulobacteraceae	Phenylobacterium	#N/A	0.0118809	RF211	B2391_Phenylobacterium	Not differential
AJ458505.1.1405	9.57693	Proteobacteria	Alphaproteobacteria	Rhizobiales	Beijerinckiaceae	Methylocystis	#N/A	0.0118672	RF212	B13_Methylocystis	Non-fer
AM930295.1.1512	5.92959	Firmicutes	Bacilli	Bacillales	Thermoactinomycetaceae	Planifilum	uncultured bacterium	0.011763	RF213	B3135_Planifilum	Not differential
EU786123.1.1486	4.79579	Chloroflexi	Chloroflexia	Thermomicrobiales	JG30-KF-CM45	#N/A	#N/A	0.0117554	RF214	B4708_f_JG30-KF-CM45	Not differential
DQ833484.1.1524	2.94444	Actinobacteria	Acidimicrobiia	Actinomarinales	uncultured	uncultured Acidimicrobiales bacterium	uncultured Acidimicrobiales bacterium	0.0116717	RF215	B9359_uncultured Acidimicrobiales bacterium	Not differential
HM069062.1.1501	6.62274	Proteobacteria	Deltaproteobacteria	Desulfobacterales	Desulfobulbaceae	Desulfobulbus	#N/A	0.0115524	RF216	B1158_Desulfobulbus	Non-fer
1be262857b0a20871e88cc8e17288ed5	8.05452	Chloroflexi	Anaerolineae	RBG-13-54-9	#N/A	#N/A	#N/A	0.0115251	RF217	B157_o_RBG-13-54-9	Not differential
JX505044.1.1413	8.15794	Proteobacteria	Alphaproteobacteria	Rhizobiales	Methyloligellaceae	uncultured	uncultured Rhodobiaceae bacterium	0.0114864	RF218	B93_uncultured	Non-fer
AY326604.1.1411	8.44677	Proteobacteria	Alphaproteobacteria	Rhizobiales	Xanthobacteraceae	uncultured	#N/A	0.0113964	RF219	B37_uncultured	Non-fer
25277ee8519190b000fabb25a50c8062	4.62497	Dependentiae	Babeliae	Babeliales	Vermiphilaceae	uncultured bacterium	uncultured bacterium	0.0113871	RF220	B3464_uncultured bacterium	Not differential
JF175527.1.1361	4.27667	Dependentiae	Babeliae	Babeliales	uncultured Candidatus Dependentiae bacterium	uncultured Candidatus Dependentiae bacterium	uncultured Candidatus Dependentiae bacterium	0.0113749	RF221	B9179_uncultured Candidatus Dependentiae bacterium	Not differential
GQ369053.1.1260	9.25071	Actinobacteria	Actinobacteria	Micrococcales	Intrasporangiaceae	Terrabacter	#N/A	0.0113137	RF222	B6_Terrabacter	Non-fer
FJ660566.1.1462	5.0689	Planctomycetes	Planctomycetacia	Gemmatales	Gemmataceae	uncultured	uncultured bacterium	0.0112451	RF223	B3827_uncultured	Not differential
e67c1bf7dcbe17ab6089726452ce6f10	4.66344	Actinobacteria	Coriobacteriia	CG2-30-50-142	Actinobacteria bacterium CG2_30_50_142	Actinobacteria bacterium CG2_30_50_142	Actinobacteria bacterium CG2_30_50_142	0.0112197	RF224	B4661_Actinobacteria bacterium CG2_30_50_142	Fer
KF515272.1.1522	7.85903	Proteobacteria	Deltaproteobacteria	Deltaproteobacteria Incertae Sedis	Syntrophorhabdaceae	Syntrophorhabdus	uncultured Syntrophorhabdaceae bacterium	0.0110434	RF225	B128_Syntrophorhabdus	Not differential
LC026868.1.1444	5.59099	Bacteroidetes	Bacteroidia	Cytophagales	Cytophagaceae	uncultured bacterium	uncultured bacterium	0.0110432	RF226	B3570_uncultured bacterium	Not differential
1a35802c0380e87d55328c856385b616	6.87523	Chloroflexi	Anaerolineae	SBR1031	A4b	#N/A	#N/A	0.0110223	RF227	B575_f_A4b	Not differential
EF019087.1.1378	7.5224	Acidobacteria	Subgroup 6	#N/A	#N/A	#N/A	#N/A	0.011014	RF228	B621_o_NA	Fer
HQ698291.1.1217	9.01821	Proteobacteria	Alphaproteobacteria	Rhizobiales	Xanthobacteraceae	#N/A	#N/A	0.0110048	RF229	B41_f_Xanthobacteraceae	Non-fer
HQ462550.1.1241	8.29305	Proteobacteria	Gammaproteobacteria	Betaproteobacteriales	Burkholderiaceae	#N/A	#N/A	0.0109372	RF230	B39_f_Burkholderiaceae	Non-fer
KC978868.1.1353	7.12528	Actinobacteria	Actinobacteria	Micrococcales	Cellulomonadaceae	Oerskovia	#N/A	0.0109337	RF231	B1491_Oerskovia	Not differential
JF198827.1.1321	7.47193	Acidobacteria	Acidobacteriia	Acidobacteriales	Koribacteraceae	Candidatus Koribacter	#N/A	0.0108655	RF232	B310_Candidatus Koribacter	Non-fer
FQ659469.1.1376	5.80212	Proteobacteria	Deltaproteobacteria	Myxococcales	BIrii41	uncultured soil bacterium	uncultured soil bacterium	0.0108212	RF233	B1544_uncultured soil bacterium	Not differential
156a73034591ca7770f8924c478b12c0	6.37843	Chloroflexi	Chloroflexia	Chloroflexales	Roseiflexaceae	uncultured	#N/A	0.0107857	RF234	B1255_uncultured	Non-fer
HQ330534.1.1369	7.07072	Acidobacteria	Subgroup 21	uncultured soil bacterium	uncultured soil bacterium	uncultured soil bacterium	uncultured soil bacterium	0.0107847	RF235	B335_uncultured soil bacterium	Fer
AB240345.1.1468	7.54062	Chloroflexi	Anaerolineae	Anaerolineales	Anaerolineaceae	uncultured	#N/A	0.0107631	RF236	B205_uncultured	Not differential
FJ716484.1.1302	7.18766	Proteobacteria	Deltaproteobacteria	Desulfarculales	Desulfarculaceae	Desulfatiglans	uncultured prokaryote	0.0107099	RF237	B277_Desulfatiglans	Not differential
a0fce4138f75dd2ea9be577bab9b34db	5.02388	Elusimicrobia	Lineage IIb	metagenome	metagenome	metagenome	metagenome	0.0106729	RF238	B2294_metagenome	Not differential
AB240244.1.1465	6.67077	Chloroflexi	Anaerolineae	RBG-13-54-9	uncultured eubacterium WCHB1-50	uncultured eubacterium WCHB1-50	uncultured eubacterium WCHB1-50	0.0106624	RF239	B1064_uncultured eubacterium WCHB1-50	Not differential
JN038860.1.1509	3.93183	Proteobacteria	Deltaproteobacteria	Oligoflexales	0319-6G20	uncultured proteobacterium	uncultured proteobacterium	0.0105565	RF240	B4250_uncultured proteobacterium	Fer
171fa51be16491bd9e0610b70d405f0a	5.45532	Proteobacteria	Deltaproteobacteria	Myxococcales	#N/A	#N/A	#N/A	0.0105481	RF241	B3241_o_Myxococcales	Fer
8b9178108b84596aac8c952205e7c647	5.9162	Chloroflexi	Anaerolineae	RBG-13-54-9	uncultured Caldilineaceae bacterium	uncultured Caldilineaceae bacterium	uncultured Caldilineaceae bacterium	0.0105472	RF242	B868_uncultured Caldilineaceae bacterium	Not differential
1adf88e405edde12c482978884726cbc	3.93183	Elusimicrobia	Endomicrobia	Endomicrobiales	Endomicrobiaceae	Candidatus Endomicrobium	uncultured bacterium	0.0103974	RF243	B6672_Candidatus Endomicrobium	Not differential
HM268815.1.1377	5.93489	Acidobacteria	Holophagae	Subgroup 7	uncultured proteobacterium	uncultured proteobacterium	uncultured proteobacterium	0.0103027	RF244	B620_uncultured proteobacterium	Fer
06157cad9967b0185bdeb0ee1405cefa	6.06146	Chloroflexi	Anaerolineae	SBR1031	A4b	uncultured bacterium	uncultured bacterium	0.0102582	RF245	B1844_uncultured bacterium	Fer
3ad62156332ea151459bfb38aa945991	5.0814	Chloroflexi	Anaerolineae	SBR1031	A4b	uncultured bacterium	uncultured bacterium	0.0102145	RF246	B3635_uncultured bacterium	Not differential
6fb12a0b9be601a063c558d4a0d8edaf	6.32257	Acidobacteria	Acidobacteriia	Subgroup 13	uncultured bacterium	uncultured bacterium	uncultured bacterium	0.0101918	RF247	B1351_uncultured bacterium	Not differential
ac178e7c79be6d20e1010112a729d061	5.52146	Acidobacteria	Subgroup 17	uncultured proteobacterium	uncultured proteobacterium	uncultured proteobacterium	uncultured proteobacterium	0.0101895	RF248	B1596_uncultured proteobacterium	Not differential
EU133922.1.1354	5.39363	Bacteroidetes	Ignavibacteria	OPB56	uncultured bacterium KF-JG30-B11	uncultured bacterium KF-JG30-B11	uncultured bacterium KF-JG30-B11	0.0100394	RF249	B3549_uncultured bacterium KF-JG30-B11	Not differential
HQ697393.1.1486	3.98898	Actinobacteria	Acidimicrobiia	Microtrichales	Microtrichaceae	uncultured	Acidimicrobidae bacterium YM18-244	0.0100174	RF250	B6896_uncultured	Not differential
KM200557.1.1526	5.05625	Proteobacteria	Deltaproteobacteria	RCP2-54	#N/A	#N/A	#N/A	0.00994674	RF251	B1631_o_RCP2-54	Non-fer
JF198782.1.1319	5.12396	Chloroflexi	Ktedonobacteria	C0119	uncultured bacterium	uncultured bacterium	uncultured bacterium	0.00984768	RF252	B919_uncultured bacterium	Non-fer
1054e4a54e223fa086da70619047b0d2	5.1299	Proteobacteria	Deltaproteobacteria	Myxococcales	BIrii41	uncultured bacterium	uncultured bacterium	0.00984704	RF253	B1219_uncultured bacterium	Non-fer
406142f214b8f49f31e50bd28e7c0024	5.82008	Proteobacteria	Deltaproteobacteria	Myxococcales	Polyangiaceae	#N/A	#N/A	0.00984386	RF254	B996_f_Polyangiaceae	Non-fer
AY921904.1.1357	4.74493	Chloroflexi	Anaerolineae	Anaerolineales	Anaerolineaceae	uncultured	uncultured Chloroflexi bacterium	0.00981526	RF255	B6381_uncultured	Not differential
34ecafb5d033bbf4fec8427c752123d5	6.2106	Chloroflexi	Anaerolineae	Anaerolineales	Anaerolineaceae	Anaerolinea	uncultured soil bacterium	0.00977873	RF256	B1152_Anaerolinea	Not differential
HE974771.1.1516	6.85224	Acidobacteria	Thermoanaerobaculia	Thermoanaerobaculales	Thermoanaerobaculaceae	Subgroup 10	bacterium enrichment culture clone Anammox_2	0.0097673	RF257	B482_Subgroup 10	Non-fer
FM200902.1.1416	6.06146	Proteobacteria	Deltaproteobacteria	Myxococcales	Sandaracinaceae	Sandaracinus	uncultured bacterium	0.00976591	RF258	B728_Sandaracinus	Non-fer
e4bd4c7a1ee54fb3e6138740de8c39f1	4.11087	Proteobacteria	Alphaproteobacteria	uncultured	uncultured bacterium	uncultured bacterium	uncultured bacterium	0.00970514	RF259	B4943_uncultured bacterium	Not differential
HM303781.1.1356	6.80904	Bacteroidetes	Bacteroidia	Chitinophagales	Chitinophagaceae	uncultured	Chitinophaga sp. BN130233	0.00968509	RF260	B1437_uncultured	Not differential
AB672236.1.1436	8.11672	Actinobacteria	Coriobacteriia	OPB41	#N/A	#N/A	#N/A	0.00964846	RF261	B32_o_OPB41	Not differential
KP204870.1.1216	9.67602	Actinobacteria	Actinobacteria	Micrococcales	Micrococcaceae	#N/A	#N/A	0.00959957	RF262	B7_f_Micrococcaceae	Non-fer
FJ538119.1.1478	7.6029	Chloroflexi	Anaerolineae	Anaerolineales	Anaerolineaceae	RBG-16-58-14	uncultured Chloroflexi bacterium	0.00945005	RF263	B52_RBG-16-58-14	Not differential
LC106985.1.1401	8.09955	Proteobacteria	Alphaproteobacteria	Rhizobiales	Xanthobacteraceae	#N/A	#N/A	0.00944255	RF264	B147_f_Xanthobacteraceae	Not differential
JX504948.1.1479	7.22766	Proteobacteria	Deltaproteobacteria	Myxococcales	Archangiaceae	Anaeromyxobacter	uncultured Anaeromyxobacter sp.	0.00941104	RF265	B388_Anaeromyxobacter	Non-fer
812655d62904ba6024a0c2d8908cb319	4.30407	Proteobacteria	Deltaproteobacteria	Myxococcales	P3OB-42	uncultured bacterium	uncultured bacterium	0.00940973	RF266	B4687_uncultured bacterium	Fer
aaeca2b7bfc713fdf91baef469faf1fd	7.5863	Acidobacteria	Subgroup 6	#N/A	#N/A	#N/A	#N/A	0.00938616	RF267	B161_o_NA	Non-fer
KX505045.1.1515	6.08222	Acidobacteria	Subgroup 6	uncultured prokaryote	uncultured prokaryote	uncultured prokaryote	uncultured prokaryote	0.00928678	RF268	B694_uncultured prokaryote	Not differential
AB240382.1.1521	6.53814	Proteobacteria	Deltaproteobacteria	Syntrophobacterales	Syntrophobacteraceae	uncultured	uncultured Syntrophaceae bacterium	0.00926588	RF269	B932_uncultured	Not differential
FPLS01044196.2.1320	6.56948	Proteobacteria	Gammaproteobacteria	Xanthomonadales	Xanthomonadaceae	#N/A	#N/A	0.00925	RF270	B1607_f_Xanthomonadaceae	Not differential
b4880428811fefca6e13a3e647679c9d	6.51915	Chloroflexi	Anaerolineae	Anaerolineales	Anaerolineaceae	uncultured	uncultured Bellilinea sp.	0.00920684	RF271	B578_uncultured	Fer
AM936702.1.1339	7.75577	Actinobacteria	Actinobacteria	Corynebacteriales	Mycobacteriaceae	Mycobacterium	#N/A	0.00918425	RF272	B303_Mycobacterium	Not differential
AJ518770.1.1242	8.03366	Proteobacteria	Alphaproteobacteria	Rhizobiales	Xanthobacteraceae	Pseudolabrys	#N/A	0.00905936	RF273	B43_Pseudolabrys	Fer
AJ390482.1.1402	6.20859	Latescibacteria	uncultured soil bacterium PRR-12	uncultured soil bacterium PRR-12	uncultured soil bacterium PRR-12	uncultured soil bacterium PRR-12	uncultured soil bacterium PRR-12	0.00900242	RF274	B1285_uncultured soil bacterium PRR-12	Non-fer
AB426207.1.1415	6.38012	Gemmatimonadetes	Gemmatimonadetes	Gemmatimonadales	Gemmatimonadaceae	uncultured	uncultured bacterium	0.00899518	RF275	B506_uncultured	Not differential
FQ659453.1.1376	7.47364	Proteobacteria	Deltaproteobacteria	Myxococcales	Haliangiaceae	Haliangium	uncultured soil bacterium	0.00898155	RF276	B231_Haliangium	Not differential
DQ404775.1.1508	7.15462	Acidobacteria	Subgroup 6	#N/A	#N/A	#N/A	#N/A	0.00897392	RF277	B215_o_NA	Not differential
EF020008.1.1386	6.3699	Proteobacteria	Gammaproteobacteria	Betaproteobacteriales	Nitrosomonadaceae	IS-44	#N/A	0.00891948	RF278	B296_IS-44	Non-fer
HQ118941.1.1519	8.03301	Proteobacteria	Deltaproteobacteria	Myxococcales	Haliangiaceae	Haliangium	#N/A	0.00884909	RF279	B179_Haliangium	Not differential
EU135578.1.1294	5.22036	Latescibacteria	uncultured soil bacterium	uncultured soil bacterium	uncultured soil bacterium	uncultured soil bacterium	uncultured soil bacterium	0.00883883	RF280	B1299_uncultured soil bacterium	Not differential
aa8db548f161b9938e82885c2aff8906	6.36475	Nitrospirae	Thermodesulfovibrionia	Thermodesulfovibrionales	Thermodesulfovibrionaceae	Thermodesulfovibrio	#N/A	0.00882143	RF281	B334_Thermodesulfovibrio	Not differential
HM243962.1.1465	6.74524	Chloroflexi	Anaerolineae	Anaerolineales	Anaerolineaceae	uncultured	#N/A	0.0088117	RF282	B494_uncultured	Non-fer
AB231940.1.1478	6.72623	Proteobacteria	Alphaproteobacteria	Rhizobiales	Rhizobiales Incertae Sedis	Alsobacter	alpha proteobacterium SK200a-2	0.00875315	RF283	B368_Alsobacter	Non-fer
HL098929.1.1495	7.32909	Bacteroidetes	Bacteroidia	Chitinophagales	Chitinophagaceae	Flavisolibacter	unidentified	0.00875198	RF284	B220_Flavisolibacter	Not differential
DQ660831.1.1358	6.71659	Acidobacteria	Holophagae	Holophagales	Holophagaceae	Geothrix	#N/A	0.00871732	RF285	B522_Geothrix	Fer
JN023364.1.1435	7.09838	Proteobacteria	Alphaproteobacteria	Caulobacterales	Caulobacteraceae	Phenylobacterium	uncultured soil bacterium	0.00869357	RF286	B360_Phenylobacterium	Not differential
FJ538129.1.1505	7.19293	Proteobacteria	Gammaproteobacteria	Betaproteobacteriales	Nitrosomonadaceae	MND1	uncultured Rhodocyclaceae bacterium	0.00867612	RF287	B191_MND1	Not differential
GU208221.1.1523	6.17379	Acidobacteria	Subgroup 22	uncultured prokaryote	uncultured prokaryote	uncultured prokaryote	uncultured prokaryote	0.00864496	RF288	B1517_uncultured prokaryote	Not differential
abfa62ac6f657ef47af6ad3798e5d69c	4.45435	Proteobacteria	Deltaproteobacteria	Myxococcales	bacteriap25	uncultured Syntrophobacterales bacterium	uncultured Syntrophobacterales bacterium	0.00861931	RF289	B4754_uncultured Syntrophobacterales bacterium	Non-fer
9121976b42791abc5c14642c49a9058f	4.07754	WOR-1	uncultured bacterium	uncultured bacterium	uncultured bacterium	uncultured bacterium	uncultured bacterium	0.00855702	RF290	B6618_uncultured bacterium	Fer
c86933363363e7fa1de5a35cf6e3b90f	6.39693	Chloroflexi	Anaerolineae	Anaerolineales	Anaerolineaceae	uncultured	#N/A	0.00854767	RF291	B1485_uncultured	Not differential
FJ897522.1.1398	7.42357	Actinobacteria	Actinobacteria	Micrococcales	Intrasporangiaceae	Phycicoccus	#N/A	0.0085393	RF292	B302_Phycicoccus	Not differential
FPLS01036007.10.1482	4.36945	Proteobacteria	Alphaproteobacteria	Tistrellales	Geminicoccaceae	Candidatus Alysiosphaera	metagenome	0.00853443	RF293	B5457_Candidatus Alysiosphaera	Not differential
FPLS01009302.2.1274	5.44242	Bacteroidetes	Bacteroidia	Sphingobacteriales	env.OPS 17	#N/A	#N/A	0.00852024	RF294	B1887_f_env.OPS 17	Fer
KU951461.1.1485	9.72693	Actinobacteria	Actinobacteria	Micrococcales	Micrococcaceae	#N/A	#N/A	0.00849851	RF295	B24_f_Micrococcaceae	Not differential
MNXI01000065.10291.11835	5.05625	Actinobacteria	Coriobacteriia	CG2-30-50-142	Actinobacteria bacterium CG2_30_50_142	Actinobacteria bacterium CG2_30_50_142	Actinobacteria bacterium CG2_30_50_142	0.00846559	RF296	B3127_Actinobacteria bacterium CG2_30_50_142	Not differential
FJ485070.1.1353	5.46383	Spirochaetes	Spirochaetia	Spirochaetales	Spirochaetaceae	Spirochaeta 2	uncultured soil bacterium	0.0084291	RF297	B1610_Spirochaeta 2	Not differential
7e478d8900d19da77d39afd32f5b91bf	6.10032	Chloroflexi	Anaerolineae	RBG-13-54-9	#N/A	#N/A	#N/A	0.00839615	RF298	B798_o_RBG-13-54-9	Non-fer
FPLL01006443.14.1531	6.00389	Proteobacteria	Gammaproteobacteria	R7C24	metagenome	metagenome	metagenome	0.00836361	RF299	B1572_metagenome	Fer
AY922170.1.1343	5.1358	Chloroflexi	TK10	Chloroflexi bacterium JEA33	Chloroflexi bacterium JEA33	Chloroflexi bacterium JEA33	Chloroflexi bacterium JEA33	0.00833825	RF300	B1419_Chloroflexi bacterium JEA33	Non-fer
EU135570.1.1394	5.33272	Latescibacteria	Latescibacteria	Latescibacterales	Latescibacteraceae	metagenome	metagenome	0.0083323	RF301	B1193_metagenome	Non-fer
51562948f8b8093db2afdf16f1018978	4.70953	Omnitrophicaeota	uncultured bacterium	uncultured bacterium	uncultured bacterium	uncultured bacterium	uncultured bacterium	0.00831187	RF302	B1635_uncultured bacterium	Not differential
GU127037.1.1217	7.0992	Latescibacteria	uncultured bacterium mle1-16	uncultured bacterium mle1-16	uncultured bacterium mle1-16	uncultured bacterium mle1-16	uncultured bacterium mle1-16	0.00829163	RF303	B230_uncultured bacterium mle1-16	Not differential
FJ484765.1.1355	5.9428	Planctomycetes	Pla3 lineage	uncultured soil bacterium PBS-II-37	uncultured soil bacterium PBS-II-37	uncultured soil bacterium PBS-II-37	uncultured soil bacterium PBS-II-37	0.00823831	RF304	B842_uncultured soil bacterium PBS-II-37	Non-fer
d156555dcf69122447846b6b0896d602	6.64898	Chloroflexi	Anaerolineae	Anaerolineales	Anaerolineaceae	uncultured	#N/A	0.00821113	RF305	B442_uncultured	Fer
FM872766.1.1509	6.77079	Proteobacteria	Deltaproteobacteria	Myxococcales	BIrii41	uncultured Sorangiineae bacterium	uncultured Sorangiineae bacterium	0.00815888	RF306	B391_uncultured Sorangiineae bacterium	Not differential
DQ137946.1.1220	8.43207	Chloroflexi	Anaerolineae	Anaerolineales	Anaerolineaceae	uncultured	#N/A	0.00815091	RF307	B125_uncultured	Fer
JX223112.1.1498	4.85203	Proteobacteria	Deltaproteobacteria	Bdellovibrionales	Bacteriovoracaceae	Peredibacter	#N/A	0.00811859	RF308	B5296_Peredibacter	Not differential
AB924399.1.1500	7.21964	Nitrospirae	Thermodesulfovibrionia	uncultured	uncultured Sphingobacteriales bacterium	uncultured Sphingobacteriales bacterium	uncultured Sphingobacteriales bacterium	0.00808984	RF309	B790_uncultured Sphingobacteriales bacterium	Fer
AB240304.1.1455	8.41339	Chloroflexi	Anaerolineae	Anaerolineales	Anaerolineaceae	Anaerolinea	uncultured bacterium	0.00803154	RF310	B16_Anaerolinea	Not differential
734a5b7cbfe0f5a61c0d09699d7bb833	6.10479	Proteobacteria	Deltaproteobacteria	Deltaproteobacteria Incertae Sedis	Syntrophorhabdaceae	Syntrophorhabdus	uncultured delta proteobacterium	0.00793036	RF311	B1805_Syntrophorhabdus	Not differential
EF589964.1.1344	6.45362	Acidobacteria	Acidobacteriia	Subgroup 2	#N/A	#N/A	#N/A	0.00791553	RF312	B404_o_Subgroup 2	Non-fer
6688c7f35c9030fbc7a9936edd281d9d	4.8828	Chloroflexi	Anaerolineae	SBR1031	anaerobic bacterium MO-CFX2	anaerobic bacterium MO-CFX2	anaerobic bacterium MO-CFX2	0.00790456	RF313	B6210_anaerobic bacterium MO-CFX2	Not differential
GU208506.1.1428	6.24222	Acidobacteria	Aminicenantia	Aminicenantales	uncultured prokaryote	uncultured prokaryote	uncultured prokaryote	0.00789493	RF314	B934_uncultured prokaryote	Not differential
KX504777.1.1528	5.52146	Nitrospirae	Thermodesulfovibrionia	uncultured	uncultured bacterium	uncultured bacterium	uncultured bacterium	0.00789123	RF315	B454_uncultured bacterium	Non-fer
HM263422.1.1345	8.75542	Actinobacteria	Actinobacteria	Propionibacteriales	Nocardioidaceae	#N/A	#N/A	0.00783663	RF316	B40_f_Nocardioidaceae	Not differential
d82371e226bcdf8d4ae99f90b57c442d	5.0814	#N/A	#N/A	#N/A	#N/A	#N/A	#N/A	0.00781632	RF317	B3074_o_NA	Not differential
FJ936854.1.1519	8.70085	Proteobacteria	Deltaproteobacteria	Syntrophobacterales	Syntrophaceae	Desulfobacca	uncultured bacterium	0.00781082	RF318	B28_Desulfobacca	Non-fer
JX898168.1.1520	5.77455	Gemmatimonadetes	Gemmatimonadetes	Gemmatimonadales	Gemmatimonadaceae	Gemmatimonas	#N/A	0.00779389	RF319	B867_Gemmatimonas	Not differential
2910fc6f86909806794ce0edd936e436	4.5326	Actinobacteria	WCHB1-81	uncultured bacterium	uncultured bacterium	uncultured bacterium	uncultured bacterium	0.00777147	RF320	B3875_uncultured bacterium	Not differential
HQ166634.1.1476	8.41005	Proteobacteria	Gammaproteobacteria	Betaproteobacteriales	Nitrosomonadaceae	Ellin6067	#N/A	0.00771637	RF321	B195_Ellin6067	Fer
7efd6c6166236666edb4ec8b7a5b6656	6.11589	Acidobacteria	Acidobacteriia	Solibacterales	Solibacteraceae (Subgroup 3)	Paludibaculum	#N/A	0.00767144	RF322	B1451_Paludibaculum	Not differential
FJ893637.1.1306	7.76811	Proteobacteria	Alphaproteobacteria	Sphingomonadales	Sphingomonadaceae	Sphingomonas	#N/A	0.00765654	RF323	B704_Sphingomonas	Not differential
AB252085.1.1289	6.37161	Bacteroidetes	Bacteroidia	Cytophagales	Hymenobacteraceae	Hymenobacter	#N/A	0.00765524	RF324	B1704_Hymenobacter	Not differential
b104892a8e80b14857a8b653be85007c	3.73767	Planctomycetes	#N/A	#N/A	#N/A	#N/A	#N/A	0.00764471	RF325	B10553_o_NA	Not differential
b143b6f28f4d7a958e3748d3c9cb14ba	4.67283	Cyanobacteria	Melainabacteria	Vampirovibrionales	metagenome	metagenome	metagenome	0.00761696	RF326	B5574_metagenome	Not differential
KX504771.1.1499	6.31173	Proteobacteria	Gammaproteobacteria	Betaproteobacteriales	Nitrosomonadaceae	Ellin6067	uncultured prokaryote	0.00751313	RF327	B2181_Ellin6067	Not differential
77a159d3ff95cf68209b917913878f32	5.96358	TA06	uncultured soil bacterium	uncultured soil bacterium	uncultured soil bacterium	uncultured soil bacterium	uncultured soil bacterium	0.00748746	RF328	B2509_uncultured soil bacterium	Not differential
AJ536888.1.1320	4.61512	Chloroflexi	Chloroflexia	Thermomicrobiales	JG30-KF-CM45	uncultured Sphaerobacter sp.	uncultured Sphaerobacter sp.	0.00748449	RF329	B2863_uncultured Sphaerobacter sp.	Not differential
HM270141.1.1381	4.07754	Verrucomicrobia	Verrucomicrobiae	Chthoniobacterales	Chthoniobacteraceae	Chthoniobacter	uncultured Spartobacteria bacterium	0.00740424	RF330	B3500_Chthoniobacter	Not differential
202ad1e607bc314cd43527cee67b857d	5.47227	Chloroflexi	Anaerolineae	#N/A	#N/A	#N/A	#N/A	0.00739128	RF331	B1108_o_NA	Not differential
9bc20adf180399338aca9a3cd17d3dca	7.2937	Chloroflexi	Anaerolineae	Anaerolineales	Anaerolineaceae	uncultured	#N/A	0.00738988	RF332	B438_uncultured	Not differential
f9c74f7b914297959acd0d8225e018a8	4.93447	#N/A	#N/A	#N/A	#N/A	#N/A	#N/A	0.00733165	RF333	B2254_o_NA	Not differential
JN684002.1.1497	6.46303	Proteobacteria	Gammaproteobacteria	Xanthomonadales	Xanthomonadaceae	uncultured	uncultured Xanthomonadaceae bacterium	0.00732693	RF334	B464_uncultured	Not differential
EU132113.1.1365	7.39572	Acidobacteria	Holophagae	Subgroup 7	#N/A	#N/A	#N/A	0.00732024	RF335	B85_o_Subgroup 7	Non-fer
EU132741.1.1303	3.85015	Actinobacteria	Actinobacteria	Pseudonocardiales	Pseudonocardiaceae	Pseudonocardia	#N/A	0.00730786	RF336	B3773_Pseudonocardia	Not differential
AJ534630.1.1307	3.8712	Proteobacteria	Deltaproteobacteria	Myxococcales	BIrii41	uncultured soil bacterium	uncultured soil bacterium	0.00728394	RF337	B1308_uncultured soil bacterium	Not differential
9273f0a9fcebdfd007006b2e5231a6af	5.39816	Bacteroidetes	Ignavibacteria	Kryptoniales	BSV26	uncultured bacterium	uncultured bacterium	0.00728146	RF338	B1173_uncultured bacterium	Non-fer
KC172352.1.1456	5.76519	Proteobacteria	Alphaproteobacteria	Reyranellales	Reyranellaceae	uncultured	#N/A	0.00727412	RF339	B1068_uncultured	Not differential
785950324d328595c841dfc79e39e895	5.0876	Latescibacteria	uncultured soil bacterium PBS-III-30	uncultured soil bacterium PBS-III-30	uncultured soil bacterium PBS-III-30	uncultured soil bacterium PBS-III-30	uncultured soil bacterium PBS-III-30	0.00724256	RF340	B1958_uncultured soil bacterium PBS-III-30	Fer
AB240347.1.1464	6.99118	Chloroflexi	Anaerolineae	SBR1031	uncultured bacterium	uncultured bacterium	uncultured bacterium	0.00720813	RF341	B363_uncultured bacterium	Not differential
EF019065.1.1384	7.3518	Proteobacteria	Gammaproteobacteria	Betaproteobacteriales	Nitrosomonadaceae	mle1-7	uncultured Rhodocyclaceae bacterium	0.00719956	RF342	B300_mle1-7	Not differential
EF127608.1.1390	8.75179	Proteobacteria	Alphaproteobacteria	Sphingomonadales	Sphingomonadaceae	Sphingomonas	#N/A	0.00712034	RF343	B270_Sphingomonas	Not differential
HM262819.1.1355	5.52146	Bacteroidetes	Bacteroidia	Chitinophagales	37-13	uncultured Sphingobacteriales bacterium	uncultured Sphingobacteriales bacterium	0.00710772	RF344	B1058_uncultured Sphingobacteriales bacterium	Not differential
EU907897.1.1345	6.7901	Proteobacteria	Alphaproteobacteria	Rhizobiales	Xanthobacteraceae	Bradyrhizobium	#N/A	0.00709242	RF345	B1470_Bradyrhizobium	Not differential
KX753099.1.1468	6.32257	Chloroflexi	AD3	uncultured Thermoflavimicrobium sp.	uncultured Thermoflavimicrobium sp.	uncultured Thermoflavimicrobium sp.	uncultured Thermoflavimicrobium sp.	0.00705424	RF346	B142_uncultured Thermoflavimicrobium sp.	Fer
EU644110.1.1462	6.72263	Actinobacteria	Thermoleophilia	Gaiellales	uncultured	uncultured prokaryote	uncultured prokaryote	0.00701835	RF347	B527_uncultured prokaryote	Not differential
b02122efc7d52ef66530208e03a8cd00	3.04452	Gemmatimonadetes	S0134 terrestrial group	uncultured soil bacterium	uncultured soil bacterium	uncultured soil bacterium	uncultured soil bacterium	0.00698394	RF348	B7596_uncultured soil bacterium	Fer
AB426221.1.1401	7.20192	Acidobacteria	Subgroup 18	#N/A	#N/A	#N/A	#N/A	0.00697364	RF349	B799_o_NA	Non-fer
KM205486.1.1416	6.78784	Proteobacteria	Alphaproteobacteria	Sphingomonadales	Sphingomonadaceae	#N/A	#N/A	0.006965	RF350	B1895_f_Sphingomonadaceae	Not differential
3f2133b235be5fdc6b8150c37ce52aff	4.66344	Proteobacteria	Gammaproteobacteria	Legionellales	Legionellaceae	Legionella	#N/A	0.00694751	RF351	B6508_Legionella	Not differential
LN573059.1.1334	6.52062	Chloroflexi	KD4-96	metagenome	metagenome	metagenome	metagenome	0.00694722	RF352	B390_metagenome	Non-fer
70f3fac8a4df9701c7aa9c7df8c1b006	5.41165	Chloroflexi	Chloroflexia	Chloroflexales	Chloroflexaceae	Oscillochloris	#N/A	0.00694635	RF353	B3183_Oscillochloris	Non-fer
AY963505.1.1447	7.93272	Proteobacteria	Gammaproteobacteria	Betaproteobacteriales	SC-I-84	#N/A	#N/A	0.00693789	RF354	B213_f_SC-I-84	Not differential
1b1e73595ca7cfc828f1debfbaffe6d0	3.17805	Proteobacteria	Deltaproteobacteria	MBNT15	uncultured prokaryote	uncultured prokaryote	uncultured prokaryote	0.00690539	RF355	B6784_uncultured prokaryote	Fer
HQ640540.1.1394	6.57786	Proteobacteria	Gammaproteobacteria	Betaproteobacteriales	Nitrosomonadaceae	Ellin6067	uncultured prokaryote	0.00688967	RF356	B1260_Ellin6067	Not differential
JQ086803.1.1484	7.80466	Proteobacteria	Deltaproteobacteria	Syntrophobacterales	Syntrophaceae	uncultured	uncultured Smithella sp.	0.00687104	RF357	B315_uncultured	Not differential
EU133459.1.1317	8.41028	Proteobacteria	Alphaproteobacteria	Sphingomonadales	Sphingomonadaceae	Sphingomonas	#N/A	0.0068217	RF358	B100_Sphingomonas	Non-fer
KM205492.1.1450	7.82644	Gemmatimonadetes	Gemmatimonadetes	Gemmatimonadales	Gemmatimonadaceae	Gemmatimonas	uncultured soil bacterium	0.0068181	RF359	B75_Gemmatimonas	Non-fer
LC124574.1.1445	5.82008	Bacteroidetes	Bacteroidia	Bacteroidales	Prolixibacteraceae	BSV13	#N/A	0.00680078	RF360	B375_BSV13	Not differential
GU208427.1.1456	5.58725	Acidobacteria	Thermoanaerobaculia	Thermoanaerobaculales	Thermoanaerobaculaceae	Thermoanaerobaculum	uncultured prokaryote	0.00675789	RF361	B1087_Thermoanaerobaculum	Non-fer
KF697448.1.1227	4.17439	Actinobacteria	Acidimicrobiia	Microtrichales	Microtrichaceae	IMCC26207	#N/A	0.00675564	RF362	B4936_IMCC26207	Non-fer
843abb8a2f63bffb86aef531b70732b7	3.3673	Chloroflexi	Chloroflexia	Chloroflexales	Roseiflexaceae	Kouleothrix	#N/A	0.0067291	RF363	B9544_Kouleothrix	Non-fer
05f0d52e5bcf9feafe2823ee77435711	5.44674	Latescibacteria	uncultured bacterium	uncultured bacterium	uncultured bacterium	uncultured bacterium	uncultured bacterium	0.00672847	RF364	B1130_uncultured bacterium	Non-fer
EF516175.1.1456	8.04815	Proteobacteria	Gammaproteobacteria	Betaproteobacteriales	A21b	uncultured delta proteobacterium	uncultured delta proteobacterium	0.00672419	RF365	B111_uncultured delta proteobacterium	Non-fer
EF019033.1.1358	4.54329	Chloroflexi	Anaerolineae	Anaerolineales	Anaerolineaceae	uncultured	#N/A	0.00670163	RF366	B1072_uncultured	Non-fer
KC734236.1.1390	5.93754	Proteobacteria	Gammaproteobacteria	Pseudomonadales	Moraxellaceae	Acinetobacter	#N/A	0.00669836	RF367	B3404_Acinetobacter	Not differential
KC541033.1.1555	5.10595	Planctomycetes	Phycisphaerae	MSBL9	metagenome	metagenome	metagenome	0.00667332	RF368	B1440_metagenome	Fer
3b2c27398ec58f8dc3092106666fb844	5.97889	Proteobacteria	Alphaproteobacteria	#N/A	#N/A	#N/A	#N/A	0.00665079	RF369	B1521_o_NA	Not differential
JX505365.1.1481	6.03548	Proteobacteria	Deltaproteobacteria	Oligoflexales	0319-6G20	uncultured Syntrophobacteraceae bacterium	uncultured Syntrophobacteraceae bacterium	0.00663778	RF370	B1777_uncultured Syntrophobacteraceae bacterium	Not differential
eecef167050f862f03986705a2c527a7	5.2575	Bacteroidetes	Bacteroidia	Sphingobacteriales	env.OPS 17	uncultured Bacteroidetes bacterium	uncultured Bacteroidetes bacterium	0.00663541	RF371	B1856_uncultured Bacteroidetes bacterium	Fer
8a14aeb1756cece8b129544c65671b51	4.98361	Chloroflexi	Anaerolineae	SBR1031	uncultured Gemmatimonadetes bacterium	uncultured Gemmatimonadetes bacterium	uncultured Gemmatimonadetes bacterium	0.00663325	RF372	B5411_uncultured Gemmatimonadetes bacterium	Not differential
DQ787716.1.1502	5.64897	Chloroflexi	Anaerolineae	ADurb.Bin180	uncultured bacterium	uncultured bacterium	uncultured bacterium	0.0066281	RF373	B1855_uncultured bacterium	Not differential
AJ278146.1.1369	5.92426	Proteobacteria	Deltaproteobacteria	Bdellovibrionales	Bacteriovoracaceae	Bacteriovorax	#N/A	0.00650853	RF374	B785_Bacteriovorax	Not differential
EF020015.1.1359	6.03309	Chloroflexi	Anaerolineae	Anaerolineales	Anaerolineaceae	uncultured	uncultured Bellilinea sp.	0.00649849	RF375	B1322_uncultured	Fer
HE974826.1.1460	5.52545	Proteobacteria	Alphaproteobacteria	Rhodospirillales	Rhodopirillaceae	Defluviicoccus	uncultured Defluviicoccus sp.	0.00645301	RF376	B29_Defluviicoccus	Non-fer
b9cf7bf883ca71a1e28348f107753f21	4.23411	Patescibacteria	Microgenomatia	Candidatus Woesebacteria	groundwater metagenome	groundwater metagenome	groundwater metagenome	0.00643999	RF377	B3303_groundwater metagenome	Fer
483fd9781f846937fa7e9d873f535981	5.02388	Chloroflexi	Anaerolineae	SBR1031	A4b	uncultured bacterium	uncultured bacterium	0.00640826	RF378	B2788_uncultured bacterium	Not differential
6676e0a4160fb7078f33d39f31c94501	4.52179	Chloroflexi	Chloroflexia	Chloroflexales	Roseiflexaceae	uncultured	uncultured bacterium	0.00633631	RF379	B4254_uncultured	Non-fer
AB486559.1.1325	5.3799	Cyanobacteria	Oxyphotobacteria	Oxyphotobacteria Incertae Sedis	Unknown Family	uncultured bacterium	uncultured bacterium	0.00632998	RF380	B2697_uncultured bacterium	Not differential
EU431696.1.1505	6.6995	Proteobacteria	Gammaproteobacteria	Xanthomonadales	Xanthomonadaceae	Arenimonas	Arenimonas daechungensis	0.00628683	RF381	B521_Arenimonas	Non-fer
949590a3ba3e6031fc676342267e600c	6.2691	Nitrospirae	Thermodesulfovibrionia	uncultured	uncultured bacterium	uncultured bacterium	uncultured bacterium	0.00626933	RF382	B1127_uncultured bacterium	Not differential
FPLS01011188.22.1257	2.89037	Verrucomicrobia	Verrucomicrobiae	Pedosphaerales	Pedosphaeraceae	metagenome	metagenome	0.0062648	RF383	B8862_metagenome	Not differential
HQ190321.1.1507	5.33272	Proteobacteria	Gammaproteobacteria	CCD24	#N/A	#N/A	#N/A	0.00624378	RF384	B2478_o_CCD24	Not differential
EF018571.1.1355	6.04737	Chloroflexi	Ktedonobacteria	C0119	uncultured Chloroflexi bacterium	uncultured Chloroflexi bacterium	uncultured Chloroflexi bacterium	0.00621168	RF385	B929_uncultured Chloroflexi bacterium	Not differential
JX505263.1.1480	7.3473	Proteobacteria	Deltaproteobacteria	Desulfuromonadales	Geobacteraceae	Geobacter	uncultured soil bacterium	0.00620095	RF386	B672_Geobacter	Fer
f0e3e3c44afb9ce52487dd83b7962dbb	4.85981	Chloroflexi	Anaerolineae	Anaerolineales	Anaerolineaceae	uncultured	#N/A	0.00618526	RF387	B1067_uncultured	Not differential
GQ021511.1.1353	6.79234	Bacteroidetes	Bacteroidia	Sphingobacteriales	Sphingobacteriaceae	Pedobacter	#N/A	0.00617727	RF388	B548_Pedobacter	Not differential
JX840394.1.1463	8.37517	Proteobacteria	Gammaproteobacteria	Pseudomonadales	Pseudomonadaceae	Pseudomonas	#N/A	0.00616542	RF389	B262_Pseudomonas	Non-fer
JX114517.1.1482	3.95124	Bacteroidetes	Bacteroidia	Sphingobacteriales	env.OPS 17	uncultured Bacteroidetes bacterium	uncultured Bacteroidetes bacterium	0.00614783	RF390	B3009_uncultured Bacteroidetes bacterium	Not differential
KJ615290.1.1330	7.21744	Proteobacteria	Gammaproteobacteria	Betaproteobacteriales	Burkholderiaceae	Polaromonas	#N/A	0.00614173	RF391	B957_Polaromonas	Not differential
KP899156.1.1393	4.70048	Firmicutes	Bacilli	Bacillales	Paenibacillaceae	Paenibacillus	#N/A	0.00613134	RF392	B5265_Paenibacillus	Non-fer
HM445368.1.1370	7.23993	Actinobacteria	Thermoleophilia	Gaiellales	Gaiellaceae	Gaiella	#N/A	0.0061018	RF393	B551_Gaiella	Not differential
JN038644.1.1524	8.10862	Proteobacteria	Deltaproteobacteria	MBNT15	uncultured Syntrophaceae bacterium	uncultured Syntrophaceae bacterium	uncultured Syntrophaceae bacterium	0.00609481	RF394	B84_uncultured Syntrophaceae bacterium	Fer
JX505306.1.1444	6.31536	Planctomycetes	Planctomycetacia	Pirellulales	Pirellulaceae	Pirellula	uncultured Pirellula sp.	0.00609474	RF395	B748_Pirellula	Not differential
HQ602802.1.1451	7.44073	Proteobacteria	Deltaproteobacteria	Syntrophobacterales	Syntrophaceae	Desulfobacca	#N/A	0.00608477	RF396	B177_Desulfobacca	Not differential
KJ192001.1.1498	7.99598	Proteobacteria	Gammaproteobacteria	Betaproteobacteriales	SC-I-84	#N/A	#N/A	0.00607389	RF397	B136_f_SC-I-84	Not differential
f82bebf2361d8695a806e9e23bef8780	4.94876	#N/A	#N/A	#N/A	#N/A	#N/A	#N/A	0.00606627	RF398	B2403_o_NA	Fer
KX913930.1.1226	5.63835	Cyanobacteria	Oxyphotobacteria	Nostocales	Nostocaceae	Nostoc PCC-7107	#N/A	0.00605823	RF399	B3576_Nostoc PCC-7107	Non-fer
4ca7c4ef7d09c8935346f523cf3e626a	4.07754	Cyanobacteria	Oxyphotobacteria	Nostocales	Nostocaceae	#N/A	#N/A	0.00605665	RF400	B10093_f_Nostocaceae	Not differential
AB630777.1.1477	6.25575	Proteobacteria	Deltaproteobacteria	Myxococcales	Haliangiaceae	Haliangium	#N/A	0.00605503	RF401	B1273_Haliangium	Non-fer
JX505138.1.1478	8.63373	Acidobacteria	Holophagae	Subgroup 7	uncultured Thermaerobacter sp.	uncultured Thermaerobacter sp.	uncultured Thermaerobacter sp.	0.00605463	RF402	B17_uncultured Thermaerobacter sp.	Not differential
9545315ca67657fcfa65051f21e321dc	7.55643	Acidobacteria	Aminicenantia	Aminicenantales	uncultured prokaryote	uncultured prokaryote	uncultured prokaryote	0.00601348	RF403	B406_uncultured prokaryote	Not differential
KC331393.1.1356	6.37502	Proteobacteria	Alphaproteobacteria	Acetobacterales	Acetobacteraceae	Roseomonas	#N/A	0.00600585	RF404	B1274_Roseomonas	Non-fer
d347e050cde16e5edacacb1a5a4310f4	5.8999	Chloroflexi	Anaerolineae	uncultured Bellilinea sp.	uncultured Bellilinea sp.	uncultured Bellilinea sp.	uncultured Bellilinea sp.	0.00600326	RF405	B459_uncultured Bellilinea sp.	Non-fer
AB630467.1.1467	5.95842	Proteobacteria	Gammaproteobacteria	MBMPE27	uncultured bacterium	uncultured bacterium	uncultured bacterium	0.00600113	RF406	B739_uncultured bacterium	Not differential
FM866305.1.1466	6.46614	Armatimonadetes	Chthonomonadetes	Chthonomonadales	uncultured bacterium	uncultured bacterium	uncultured bacterium	0.00599329	RF407	B534_uncultured bacterium	Non-fer
EU360304.1.1433	9.99698	Proteobacteria	Deltaproteobacteria	MBNT15	uncultured prokaryote	uncultured prokaryote	uncultured prokaryote	0.00595997	RF408	B1_uncultured prokaryote	Non-fer
FJ592887.1.1369	7.07918	Bacteroidetes	Ignavibacteria	OPB56	uncultured bacterium	uncultured bacterium	uncultured bacterium	0.00594192	RF409	B453_uncultured bacterium	Not differential
HQ697454.1.1513	6.03787	Actinobacteria	Thermoleophilia	Gaiellales	uncultured	Gaiella sp. EBR4-RS1	Gaiella sp. EBR4-RS1	0.0059383	RF410	B1531_Gaiella sp. EBR4-RS1	Not differential
KY287412.1.1366	8.28627	Acidobacteria	Subgroup 6	#N/A	#N/A	#N/A	#N/A	0.00592641	RF411	B74_o_NA	Non-fer
JN038960.1.1495	5.4848	Bacteroidetes	Ignavibacteria	Kryptoniales	BSV26	uncultured bacterium	uncultured bacterium	0.00591415	RF412	B881_uncultured bacterium	Not differential
509835418eb362bb8bfcd517c652c4f8	5.98645	Acidobacteria	Acidobacteriia	Solibacterales	Solibacteraceae (Subgroup 3)	Paludibaculum	#N/A	0.0059056	RF413	B2425_Paludibaculum	Fer
AB630560.1.1424	5.02388	Chloroflexi	Anaerolineae	Anaerolineales	Anaerolineaceae	Anaerolinea	uncultured Anaerolineaceae bacterium	0.0059	RF414	B1277_Anaerolinea	Fer
KX504806.1.1494	5.8944	Bacteroidetes	Ignavibacteria	Kryptoniales	BSV26	#N/A	#N/A	0.00589951	RF415	B826_f_BSV26	Not differential
GU208219.1.1518	7.68064	Acidobacteria	Subgroup 17	uncultured prokaryote	uncultured prokaryote	uncultured prokaryote	uncultured prokaryote	0.00588582	RF416	B152_uncultured prokaryote	Not differential
DQ125834.1.1450	5.34711	Chloroflexi	Ktedonobacteria	Ktedonobacterales	JG30-KF-AS9	uncultured bacterium	uncultured bacterium	0.00587083	RF417	B3066_uncultured bacterium	Fer
HQ674937.1.1489	6.61473	Acidobacteria	Acidobacteriia	Acidobacteriales	uncultured	#N/A	#N/A	0.00586367	RF418	B631_f_uncultured	Non-fer
JN038996.1.1487	5.18178	Fibrobacteres	Fibrobacteria	Fibrobacterales	possible family 01	metagenome	metagenome	0.00585822	RF419	B3055_metagenome	Not differential
JN038761.1.1480	7.41818	Nitrospirae	Thermodesulfovibrionia	uncultured	uncultured bacterium	uncultured bacterium	uncultured bacterium	0.00583333	RF420	B353_uncultured bacterium	Fer
AB486649.1.1358	7.01481	Gemmatimonadetes	Gemmatimonadetes	Gemmatimonadales	Gemmatimonadaceae	Gemmatimonas	uncultured Gemmatimonas sp.	0.00581006	RF421	B86_Gemmatimonas	Fer
eb0e5bcb5542972acee9023a4a878997	5.50939	Chloroflexi	Anaerolineae	RBG-13-54-9	uncultured Caldilineaceae bacterium	uncultured Caldilineaceae bacterium	uncultured Caldilineaceae bacterium	0.00580859	RF422	B1090_uncultured Caldilineaceae bacterium	Non-fer
fa73f3b8d2b15a03285d38a53d4580ab	7.00851	Chloroflexi	Anaerolineae	Anaerolineales	Anaerolineaceae	uncultured	uncultured Chloroflexi bacterium	0.00580699	RF423	B904_uncultured	Non-fer
6f21e5f4d2f3c42ed70112a8c217f1bb	1.60944	Omnitrophicaeota	Omnitrophia	Omnitrophales	Omnitrophaceae	Candidatus Omnitrophus	Candidatus Omnitrophus fodinae SCGC AAA011-A17	0.00579568	RF424	B19335_Candidatus Omnitrophus	Not differential
FQ658834.1.1383	5.92426	Proteobacteria	Deltaproteobacteria	Desulfarculales	Desulfarculaceae	Desulfatiglans	uncultured soil bacterium	0.00577964	RF425	B1168_Desulfatiglans	Not differential
KT342857.7981.9515	7.47477	Actinobacteria	Thermoleophilia	Gaiellales	uncultured	uncultured bacterium 5G12	uncultured bacterium 5G12	0.005773	RF426	B595_uncultured bacterium 5G12	Fer
JX079319.1.1480	4.77912	Acidobacteria	Acidobacteriia	Solibacterales	Solibacteraceae (Subgroup 3)	Bryobacter	uncultured soil bacterium	0.00576023	RF427	B2805_Bryobacter	Fer
FM253569.1.1524	5.33272	Proteobacteria	Deltaproteobacteria	NB1-j	uncultured proteobacterium	uncultured proteobacterium	uncultured proteobacterium	0.00570788	RF428	B1244_uncultured proteobacterium	Not differential
4c959e141a172560b1448e528fb7675b	6.16961	Chloroflexi	Chloroflexia	Thermomicrobiales	JG30-KF-CM45	uncultured soil bacterium	uncultured soil bacterium	0.00568056	RF429	B1376_uncultured soil bacterium	Non-fer
HE589853.1.1467	2.83321	Firmicutes	Negativicutes	Selenomonadales	uncultured	#N/A	#N/A	0.00567138	RF430	B3689_f_uncultured	Not differential
03b6100dd58fbfd00ad23ef90256a0cc	5.35186	Chloroflexi	Chloroflexia	Chloroflexales	Roseiflexaceae	uncultured	uncultured soil bacterium	0.00564444	RF431	B2722_uncultured	Not differential
d1665104979d0fe65446e2a7694e1151	5.43372	Acidobacteria	Holophagae	Subgroup 7	#N/A	#N/A	#N/A	0.00559989	RF432	B1220_o_Subgroup 7	Non-fer
AB672246.1.1441	5.36598	Acidobacteria	Acidobacteriia	Subgroup 12	uncultured bacterium	uncultured bacterium	uncultured bacterium	0.00557665	RF433	B1465_uncultured bacterium	Not differential
HM445147.1.1343	6.48464	Acidobacteria	Acidobacteriia	Acidobacteriales	uncultured	#N/A	#N/A	0.00557348	RF434	B395_f_uncultured	Not differential
EF018230.1.1367	8.08703	Gemmatimonadetes	Gemmatimonadetes	Gemmatimonadales	Gemmatimonadaceae	uncultured	#N/A	0.00555175	RF435	B130_uncultured	Not differential
AM935253.1.1343	4.02535	Actinobacteria	Acidimicrobiia	uncultured	uncultured Acidimicrobidae bacterium	uncultured Acidimicrobidae bacterium	uncultured Acidimicrobidae bacterium	0.00553571	RF436	B5802_uncultured Acidimicrobidae bacterium	Non-fer
AB696289.1.1407	5.05625	Actinobacteria	Acidimicrobiia	uncultured	#N/A	#N/A	#N/A	0.00553514	RF437	B1624_o_uncultured	Non-fer
914e9c98c89b2b5127fd9652a5798a1c	5.15329	Planctomycetes	Planctomycetacia	Gemmatales	Gemmataceae	uncultured	uncultured bacterium	0.00552924	RF438	B877_uncultured	Fer
JN615820.1.1390	4.20469	Bacteroidetes	Bacteroidia	Chitinophagales	Saprospiraceae	uncultured	bacterium enrichment culture clone SRAO_34	0.00552336	RF439	B2794_uncultured	Not differential
0ee522d48f461cd13b54bf436ce9a357	4.63473	Chloroflexi	Dehalococcoidia	Dehalococcoidales	uncultured	uncultured bacterium	uncultured bacterium	0.00551572	RF440	B7542_uncultured bacterium	Not differential
AB672194.1.1440	7.26052	Gemmatimonadetes	Gemmatimonadetes	Gemmatimonadales	Gemmatimonadaceae	uncultured	#N/A	0.00551348	RF441	B654_uncultured	Not differential
EF019416.1.1347	6.97728	Acidobacteria	Acidobacteriia	Solibacterales	Solibacteraceae (Subgroup 3)	Candidatus Solibacter	#N/A	0.00544734	RF442	B131_Candidatus Solibacter	Non-fer
AB128884.1.1520	5.31321	Proteobacteria	Deltaproteobacteria	Myxococcales	27F-1492R	uncultured bacterium	uncultured bacterium	0.00541439	RF443	B714_uncultured bacterium	Non-fer
eb7d9582517038ab98a6502c7bda1823	2.19722	Planctomycetes	vadinHA49	uncultured organism	uncultured organism	uncultured organism	uncultured organism	0.00540971	RF444	B11883_uncultured organism	Non-fer
43f71a5ac290ceb5d9c36abf7e8f6dd4	4.17439	Bacteroidetes	Bacteroidia	Bacteroidales	SB-5	#N/A	#N/A	0.00537023	RF445	B2666_f_SB-5	Not differential
FPLS01058252.1.1411	8.21986	Proteobacteria	Deltaproteobacteria	Myxococcales	Polyangiaceae	Pajaroellobacter	uncultured Chondromyces sp.	0.00534583	RF446	B81_Pajaroellobacter	Not differential
ATTT01000037.173.1685	5.99146	Proteobacteria	Gammaproteobacteria	Betaproteobacteriales	SC-I-84	beta proteobacterium JGI 0001003-N18	beta proteobacterium JGI 0001003-N18	0.00534167	RF447	B545_beta proteobacterium JGI 0001003-N18	Not differential
AY395384.1.1394	4.20469	Chloroflexi	TK10	uncultured Chloroflexi bacterium	uncultured Chloroflexi bacterium	uncultured Chloroflexi bacterium	uncultured Chloroflexi bacterium	0.00533097	RF448	B2296_uncultured Chloroflexi bacterium	Non-fer
HM335384.1.1352	6.71901	Bacteroidetes	Bacteroidia	Sphingobacteriales	Sphingobacteriaceae	Mucilaginibacter	#N/A	0.00531569	RF449	B585_Mucilaginibacter	Non-fer
HQ119574.1.1475	3.85015	Proteobacteria	Deltaproteobacteria	Bdellovibrionales	Bdellovibrionaceae	OM27 clade	#N/A	0.0053135	RF450	B7902_OM27 clade	Non-fer
HM269949.1.1376	5.53339	Proteobacteria	Deltaproteobacteria	Myxococcales	Archangiaceae	Anaeromyxobacter	#N/A	0.00529478	RF451	B253_Anaeromyxobacter	Not differential
HQ597829.1.1474	6.05209	Acidobacteria	Subgroup 11	uncultured Acidobacteria bacterium	uncultured Acidobacteria bacterium	uncultured Acidobacteria bacterium	uncultured Acidobacteria bacterium	0.00527877	RF452	B999_uncultured Acidobacteria bacterium	Not differential
JF265777.1.1358	8.34735	Proteobacteria	Gammaproteobacteria	Betaproteobacteriales	Nitrosomonadaceae	Ellin6067	#N/A	0.00527604	RF453	B110_Ellin6067	Not differential
f3b49ef92928ff7988e3d6376da99dbf	4.67283	Proteobacteria	Gammaproteobacteria	Acidiferrobacterales	Acidiferrobacteraceae	Sulfurifustis	uncultured gamma proteobacterium	0.00524246	RF454	B3950_Sulfurifustis	Not differential
2d7d8a7b17fa492049de53bb6ea91787	1.79176	Lentisphaerae	Lentisphaeria	Victivallales	Arctic95B-14	uncultured deep-sea bacterium	uncultured deep-sea bacterium	0.00522999	RF455	B19674_uncultured deep-sea bacterium	Not differential
EU135494.1.1393	4.33073	Verrucomicrobia	Verrucomicrobiae	Pedosphaerales	Pedosphaeraceae	uncultured verrucomicrobium DEV064	uncultured verrucomicrobium DEV064	0.00521805	RF456	B2315_uncultured verrucomicrobium DEV064	Not differential
e76e6d0c0966ad364405faeb8a48dac2	4.57471	Spirochaetes	Spirochaetia	Spirochaetales	Spirochaetaceae	Spirochaeta 2	#N/A	0.00521717	RF457	B2564_Spirochaeta 2	Not differential
HM270648.1.1367	7.06476	Actinobacteria	Thermoleophilia	Gaiellales	Gaiellaceae	Gaiella	uncultured actinobacterium	0.00521429	RF458	B341_Gaiella	Non-fer
EF019565.1.1383	4.72739	#N/A	#N/A	#N/A	#N/A	#N/A	#N/A	0.00520934	RF459	B771_o_NA	Not differential
dd0722e367c81e3fcc4b8b8fa4dea05d	4.96284	Cyanobacteria	Oxyphotobacteria	Nostocales	Microcystaceae	#N/A	#N/A	0.00520701	RF460	B3506_f_Microcystaceae	Not differential
321bbd3361c86112c9263f2193e9b9f9	5.14749	Chloroflexi	Anaerolineae	SBR1031	#N/A	#N/A	#N/A	0.00519444	RF461	B2420_o_SBR1031	Not differential
KF515271.1.1488	7.00941	Nitrospirae	Thermodesulfovibrionia	uncultured	#N/A	#N/A	#N/A	0.00519106	RF462	B365_o_uncultured	Not differential
JX504915.1.1424	5.83481	Chloroflexi	Gitt-GS-136	uncultured Caldilinea sp.	uncultured Caldilinea sp.	uncultured Caldilinea sp.	uncultured Caldilinea sp.	0.00517439	RF463	B1741_uncultured Caldilinea sp.	Fer
HM270165.1.1354	8.68913	Proteobacteria	Gammaproteobacteria	Betaproteobacteriales	SC-I-84	#N/A	#N/A	0.00517326	RF464	B25_f_SC-I-84	Non-fer
GU127722.1.1464	8.17695	Proteobacteria	Gammaproteobacteria	Betaproteobacteriales	Gallionellaceae	#N/A	#N/A	0.00517138	RF465	B89_f_Gallionellaceae	Not differential
AB523413.1.1481	6.44413	Actinobacteria	Actinobacteria	Micrococcales	Intrasporangiaceae	Oryzihumus	#N/A	0.00516618	RF466	B804_Oryzihumus	Non-fer
FR749742.1.1521	4.36945	Verrucomicrobia	Verrucomicrobiae	Opitutales	Opitutaceae	Opitutus	uncultured Verrucomicrobia bacterium	0.00513472	RF467	B7148_Opitutus	Not differential
LN573789.1.1382	5.46383	Actinobacteria	Thermoleophilia	Solirubrobacterales	67-14	uncultured Rubrobacteria bacterium	uncultured Rubrobacteria bacterium	0.00510799	RF468	B1466_uncultured Rubrobacteria bacterium	Not differential
FJ538159.1.1489	5.02388	Actinobacteria	Actinobacteria	Frankiales	Acidothermaceae	Acidothermus	uncultured soil bacterium	0.00510769	RF469	B1055_Acidothermus	Not differential
KR150755.1.1369	6.76849	Firmicutes	Bacilli	Bacillales	Bacillaceae	Bacillus	#N/A	0.00509463	RF470	B886_Bacillus	Fer
HQ114125.1.1472	6.18002	Gemmatimonadetes	Gemmatimonadetes	Gemmatimonadales	Gemmatimonadaceae	uncultured	#N/A	0.00508782	RF471	B690_uncultured	Fer
d282cc1a308ddefaf1f1130fb737c728	2.99573	Chloroflexi	Anaerolineae	SBR1031	A4b	uncultured bacterium	uncultured bacterium	0.00508433	RF472	B15391_uncultured bacterium	Not differential
AB487770.1.1360	7.38461	Proteobacteria	Gammaproteobacteria	Betaproteobacteriales	Burkholderiaceae	#N/A	#N/A	0.00507146	RF473	B1232_f_Burkholderiaceae	Non-fer
HM243927.1.1515	8.21852	Proteobacteria	Deltaproteobacteria	Desulfuromonadales	Geobacteraceae	Geobacter	#N/A	0.00506199	RF474	B96_Geobacter	Fer
5d6aedf247a2b185826d55150daacc62	6.50129	Planctomycetes	Phycisphaerae	Tepidisphaerales	WD2101 soil group	#N/A	#N/A	0.00504329	RF475	B523_f_WD2101 soil group	Not differential
JF342354.1.1491	7.16549	Actinobacteria	Actinobacteria	Micrococcales	Intrasporangiaceae	#N/A	#N/A	0.00499561	RF476	B18_f_Intrasporangiaceae	Non-fer
AB630511.1.1444	6.30079	Bacteroidetes	Bacteroidia	Bacteroidales	SB-5	uncultured soil bacterium	uncultured soil bacterium	0.0049696	RF477	B604_uncultured soil bacterium	Not differential
56cce2d826b1dd307cad08c657e4876e	3.49651	Proteobacteria	Gammaproteobacteria	Piscirickettsiales	Piscirickettsiaceae	Candidatus Endoecteinascidia	uncultured bacterium	0.00495833	RF478	B9470_Candidatus Endoecteinascidia	Not differential
36421190c84e8ac6735a9f27219d1fd5	4.43082	Chloroflexi	Ktedonobacteria	C0119	uncultured Chloroflexi bacterium	uncultured Chloroflexi bacterium	uncultured Chloroflexi bacterium	0.00495287	RF479	B1891_uncultured Chloroflexi bacterium	Non-fer
817382e383a90d09558fd535ba3117f2	5.69373	Gemmatimonadetes	S0134 terrestrial group	uncultured bacterium	uncultured bacterium	uncultured bacterium	uncultured bacterium	0.00494881	RF480	B1212_uncultured bacterium	Non-fer
EF516467.1.1445	6.09131	Bacteroidetes	Bacteroidia	Sphingobacteriales	Sphingobacteriaceae	Mucilaginibacter	#N/A	0.00494447	RF481	B1024_Mucilaginibacter	Not differential
GQ472450.1.1438	4.40672	Planctomycetes	Planctomycetacia	Pirellulales	Pirellulaceae	#N/A	#N/A	0.0049007	RF482	B6253_f_Pirellulaceae	Non-fer
KM205529.1.1449	5.59842	Acidobacteria	Aminicenantia	Aminicenantales	uncultured soil bacterium	uncultured soil bacterium	uncultured soil bacterium	0.00489293	RF483	B1731_uncultured soil bacterium	Not differential
AB234282.1.1515	6.4599	Spirochaetes	Spirochaetia	Spirochaetales	Spirochaetaceae	Spirochaeta 2	Spirochaeta sp.	0.00489225	RF484	B392_Spirochaeta 2	Not differential
d78cd680096db15f2bdb4fa352b1ddde	3.3673	Firmicutes	Clostridia	Clostridiales	Ruminococcaceae	Ruminococcaceae NK4A214 group	uncultured bacterium CA26	0.00489216	RF485	B9629_Ruminococcaceae NK4A214 group	Not differential
185650bb6eb359b18539b5f88bd1c3f1	5.56834	Chloroflexi	Dehalococcoidia	#N/A	#N/A	#N/A	#N/A	0.0048818	RF486	B1018_o_NA	Not differential
301adc7b7c1f6a2daa5d43b72b8813b8	6.23637	Chloroflexi	KD4-96	#N/A	#N/A	#N/A	#N/A	0.00487582	RF487	B806_o_NA	Fer
CU921500.1.1343	4.63473	Planctomycetes	Planctomycetacia	Gemmatales	Gemmataceae	uncultured	uncultured bacterium	0.00487357	RF488	B3676_uncultured	Not differential
2e5c6daacd7d28ade75d897be836bcec	5.71373	Chloroflexi	Anaerolineae	RBG-13-54-9	uncultured eubacterium WCHB1-50	uncultured eubacterium WCHB1-50	uncultured eubacterium WCHB1-50	0.00487135	RF489	B713_uncultured eubacterium WCHB1-50	Not differential
FR749738.1.1491	6.24611	Acidobacteria	Holophagae	Subgroup 7	#N/A	#N/A	#N/A	0.00485558	RF490	B2811_o_Subgroup 7	Not differential
FJ810555.1.1478	5.83773	Actinobacteria	Actinobacteria	Frankiales	Sporichthyaceae	#N/A	#N/A	0.00485307	RF491	B2434_f_Sporichthyaceae	Non-fer
HQ697568.1.1484	6.57647	Actinobacteria	Actinobacteria	Kineosporiales	Kineosporiaceae	uncultured	uncultured bacterium	0.00484942	RF492	B1707_uncultured	Not differential
fa861f297d54f8ad1b51c358c0f37b95	5.90536	Chloroflexi	Anaerolineae	SBR1031	uncultured bacterium	uncultured bacterium	uncultured bacterium	0.00484797	RF493	B1306_uncultured bacterium	Not differential
HM269680.1.1344	7.0639	Bacteroidetes	Bacteroidia	Flavobacteriales	Flavobacteriaceae	Flavobacterium	#N/A	0.00483143	RF494	B1536_Flavobacterium	Fer
7f1047ebb8fd37ac38d28de086d5bcd1	2.56495	#N/A	#N/A	#N/A	#N/A	#N/A	#N/A	0.00481106	RF495	B17175_o_NA	Not differential
KR072559.1.1435	6.85541	Proteobacteria	Gammaproteobacteria	Xanthomonadales	Xanthomonadaceae	Lysobacter	#N/A	0.00481098	RF496	B1737_Lysobacter	Not differential
acb4a37788efca8499d53cdbf38449ec	6.03787	Proteobacteria	Gammaproteobacteria	Betaproteobacteriales	SC-I-84	#N/A	#N/A	0.00480499	RF497	B697_f_SC-I-84	Not differential
95b91aed6d600f0eeb6eb96a818bea4e	4.84419	Bacteroidetes	Ignavibacteria	Kryptoniales	BSV26	uncultured bacterium	uncultured bacterium	0.00480342	RF498	B1781_uncultured bacterium	Fer
98ef3d693a3ca08732eed39658a9225c	3.73767	#N/A	#N/A	#N/A	#N/A	#N/A	#N/A	0.00480279	RF499	B11726_o_NA	Not differential
3bbdf470298a99e3b88e43a416e0ad0b	7.07327	Chloroflexi	Anaerolineae	SBR1031	uncultured Gemmatimonadetes bacterium	uncultured Gemmatimonadetes bacterium	uncultured Gemmatimonadetes bacterium	0.00479857	RF500	B330_uncultured Gemmatimonadetes bacterium	Not differential
JN039016.1.1494	6.74759	Acidobacteria	Subgroup 18	#N/A	#N/A	#N/A	#N/A	0.00479052	RF501	B1037_o_NA	Fer
GQ111265.1.1365	7.83281	Actinobacteria	Thermoleophilia	Gaiellales	uncultured	#N/A	#N/A	0.00478098	RF502	B182_f_uncultured	Non-fer
AB488356.1.1380	7.33106	Acidobacteria	Holophagae	Subgroup 7	uncultured Desulfuromonadales bacterium	uncultured Desulfuromonadales bacterium	uncultured Desulfuromonadales bacterium	0.00477988	RF503	B419_uncultured Desulfuromonadales bacterium	Not differential
MGDH01000023.33599.35182	3.3322	Schekmanbacteria	Candidatus Schekmanbacteria bacterium RIFCSPLOWO2_02_FULL_38_14	Candidatus Schekmanbacteria bacterium RIFCSPLOWO2_02_FULL_38_14	Candidatus Schekmanbacteria bacterium RIFCSPLOWO2_02_FULL_38_14	Candidatus Schekmanbacteria bacterium RIFCSPLOWO2_02_FULL_38_14	Candidatus Schekmanbacteria bacterium RIFCSPLOWO2_02_FULL_38_14	0.00475088	RF504	B4990_Candidatus Schekmanbacteria bacterium RIFCSPLOWO2_02_FULL_38_14	Not differential
GU389505.1.1227	6.08904	Chloroflexi	Anaerolineae	SBR1031	metagenome	metagenome	metagenome	0.00473573	RF505	B860_metagenome	Not differential
43ee69d2dbb43d78fd968b198225bfaa	4.82028	Chloroflexi	Anaerolineae	Caldilineales	Caldilineaceae	#N/A	#N/A	0.00472276	RF506	B2284_f_Caldilineaceae	Not differential
FPLS01020433.13.1513	5.03044	Bacteroidetes	Bacteroidia	Cytophagales	Hymenobacteraceae	Adhaeribacter	#N/A	0.00471429	RF507	B4915_Adhaeribacter	Fer
ebbbd72e70cefb93cbe7f75a1fa0419f	7.2485	Chloroflexi	Anaerolineae	Anaerolineales	Anaerolineaceae	RBG-16-58-14	uncultured bacterium	0.0046994	RF508	B460_RBG-16-58-14	Not differential
AB672245.1.1436	5.18178	Acidobacteria	Acidobacteriia	Subgroup 12	uncultured bacterium	uncultured bacterium	uncultured bacterium	0.00469831	RF509	B1847_uncultured bacterium	Non-fer
EF020034.1.1372	6.62007	Gemmatimonadetes	Gemmatimonadetes	Gemmatimonadales	Gemmatimonadaceae	Gemmatimonas	bacterium enrichment culture clone auto9_4W	0.00469081	RF510	B783_Gemmatimonas	Not differential
058ec6251e047160b8671360658a013a	4.64439	Spirochaetes	Spirochaetia	Spirochaetales	Spirochaetaceae	Spirochaeta 2	uncultured bacterium	0.00468202	RF511	B1743_Spirochaeta 2	Not differential
JF235770.1.1354	8.15421	Proteobacteria	Gammaproteobacteria	Betaproteobacteriales	SC-I-84	#N/A	#N/A	0.00467766	RF512	B211_f_SC-I-84	Non-fer
JN038785.1.1511	6.19848	Acidobacteria	Subgroup 22	uncultured Acidobacterium sp.	uncultured Acidobacterium sp.	uncultured Acidobacterium sp.	uncultured Acidobacterium sp.	0.00463797	RF513	B432_uncultured Acidobacterium sp.	Not differential
EF019667.1.1348	6.85013	Acidobacteria	Acidobacteriia	Solibacterales	Solibacteraceae (Subgroup 3)	Candidatus Solibacter	uncultured proteobacterium	0.00462679	RF514	B416_Candidatus Solibacter	Fer
FPLM01006557.1.1425	3.52636	Proteobacteria	Gammaproteobacteria	Legionellales	Legionellaceae	Legionella	metagenome	0.00461429	RF515	B12835_Legionella	Non-fer
AY960779.1.1357	5.17615	Verrucomicrobia	Verrucomicrobiae	Pedosphaerales	Pedosphaeraceae	bacterium Ellin516	bacterium Ellin516	0.0046138	RF516	B1333_bacterium Ellin516	Not differential
5248364bc653116d760b7d746e5cfabb	6.4677	Chloroflexi	Anaerolineae	Anaerolineales	Anaerolineaceae	RBG-16-58-14	#N/A	0.00460913	RF517	B791_RBG-16-58-14	Fer
FJ936807.1.1478	5.12396	Firmicutes	Clostridia	Clostridiales	Clostridiaceae 1	Fonticella	#N/A	0.00460461	RF518	B2848_Fonticella	Not differential
41bbac4ed4062ecf4803ca22bd0bdee2	3.63759	Proteobacteria	Gammaproteobacteria	Methylococcales	Methylococcaceae	#N/A	#N/A	0.00460434	RF519	B12218_f_Methylococcaceae	Non-fer
c182bf673157b85f23b06e03a27b8e9c	5.34233	Actinobacteria	Thermoleophilia	Solirubrobacterales	Solirubrobacteraceae	Conexibacter	#N/A	0.00460051	RF520	B4973_Conexibacter	Not differential
46daa4e11f0df317b527548bf2df0c52	4.2485	Chloroflexi	Anaerolineae	RBG-13-54-9	uncultured sludge bacterium A31	uncultured sludge bacterium A31	uncultured sludge bacterium A31	0.00459415	RF521	B2424_uncultured sludge bacterium A31	Not differential
KM205459.1.1444	6.63595	Actinobacteria	MB-A2-108	uncultured soil bacterium	uncultured soil bacterium	uncultured soil bacterium	uncultured soil bacterium	0.00458662	RF522	B726_uncultured soil bacterium	Not differential
JF202198.1.1308	8.38412	Proteobacteria	Alphaproteobacteria	Rhizobiales	Xanthobacteraceae	#N/A	#N/A	0.00458298	RF523	B138_f_Xanthobacteraceae	Non-fer
890390ed9d2baa5d4ded9f2c093ac3c2	3.17805	Planctomycetes	OM190	#N/A	#N/A	#N/A	#N/A	0.00457937	RF524	B5617_o_NA	Not differential
AB672137.1.1433	6.04737	Armatimonadetes	Fimbriimonadia	Fimbriimonadales	Fimbriimonadaceae	uncultured bacterium	uncultured bacterium	0.00456807	RF525	B759_uncultured bacterium	Not differential
c31c1af323441ec69fcba3d251e57eb8	5.03695	Gemmatimonadetes	S0134 terrestrial group	#N/A	#N/A	#N/A	#N/A	0.00455439	RF526	B684_o_NA	Non-fer
AM691112.1.1456	9.11493	Proteobacteria	Gammaproteobacteria	Betaproteobacteriales	Burkholderiaceae	Massilia	#N/A	0.00454135	RF527	B112_Massilia	Non-fer
EU266873.1.1530	3.55535	Proteobacteria	Deltaproteobacteria	Sva0485	#N/A	#N/A	#N/A	0.00453735	RF528	B1960_o_Sva0485	Non-fer
FN396946.1.1249	4.96981	Chloroflexi	Anaerolineae	Anaerolineales	Anaerolineaceae	Pelolinea	uncultured bacterium	0.00453727	RF529	B6251_Pelolinea	Not differential
JN038788.1.1513	6.85435	Proteobacteria	Deltaproteobacteria	Desulfuromonadales	Geobacteraceae	Geobacter	#N/A	0.00453419	RF530	B956_Geobacter	Not differential
AB364824.1.1467	3.97029	WS2	uncultured bacterium	uncultured bacterium	uncultured bacterium	uncultured bacterium	uncultured bacterium	0.004525	RF531	B6626_uncultured bacterium	Not differential
1e55b271c985b2ec6caf58ae2c42e603	5.75574	Acidobacteria	Acidobacteriia	Solibacterales	Solibacteraceae (Subgroup 3)	Bryobacter	uncultured soil bacterium	0.00451228	RF532	B1015_Bryobacter	Not differential
AY395371.1.1464	5.50939	Proteobacteria	Deltaproteobacteria	Desulfarculales	Desulfarculaceae	uncultured	metagenome	0.0044993	RF533	B647_uncultured	Non-fer
FPLS01046662.16.1394	7.19519	Proteobacteria	Alphaproteobacteria	Rhizobiales	Xanthobacteraceae	uncultured	#N/A	0.00447665	RF534	B439_uncultured	Fer
JX079302.1.1280	6.38182	Chloroflexi	Anaerolineae	Caldilineales	Caldilineaceae	uncultured	uncultured soil bacterium	0.00447159	RF535	B1673_uncultured	Not differential
FPLS01049074.12.1498	4.44265	Cyanobacteria	Melainabacteria	Obscuribacterales	metagenome	metagenome	metagenome	0.00446944	RF536	B4160_metagenome	Not differential
536a4e954d11d171802dbb9a559ffb15	4.00733	Bacteroidetes	Bacteroidia	Chitinophagales	#N/A	#N/A	#N/A	0.00445742	RF537	B4716_o_Chitinophagales	Not differential
42ca735df63c44e98254e90f4014cccf	6.49224	Chloroflexi	SHA-26	uncultured Dehalogenimonas sp.	uncultured Dehalogenimonas sp.	uncultured Dehalogenimonas sp.	uncultured Dehalogenimonas sp.	0.00444635	RF538	B376_uncultured Dehalogenimonas sp.	Not differential
KY287309.1.1487	7.72268	Nitrospirae	Thermodesulfovibrionia	uncultured	uncultured Sphingobacteriales bacterium	uncultured Sphingobacteriales bacterium	uncultured Sphingobacteriales bacterium	0.00444444	RF539	B113_uncultured Sphingobacteriales bacterium	Not differential
AJ536856.1.1308	6.63988	Proteobacteria	Alphaproteobacteria	Rhizobiales	Xanthobacteraceae	Pseudolabrys	#N/A	0.00444338	RF540	B602_Pseudolabrys	Not differential
ab38aa0576a29b0ea923023663b09261	2.48491	#N/A	#N/A	#N/A	#N/A	#N/A	#N/A	0.00444338	RF541	B4481_o_NA	Not differential
23c7f9c3452855d6d999cecee5584f63	3.43399	Chloroflexi	Anaerolineae	RBG-13-54-9	uncultured Caldilineaceae bacterium	uncultured Caldilineaceae bacterium	uncultured Caldilineaceae bacterium	0.0044385	RF542	B1647_uncultured Caldilineaceae bacterium	Not differential
GQ406172.1.1499	7.21671	Bacteroidetes	Bacteroidia	Bacteroidales	Bacteroidetes vadinHA17	uncultured prokaryote	uncultured prokaryote	0.00443651	RF543	B308_uncultured prokaryote	Not differential
56f7a44a766cd83ef027826463b4f542	6.73697	Actinobacteria	Thermoleophilia	Gaiellales	uncultured	#N/A	#N/A	0.00440769	RF544	B174_f_uncultured	Not differential
HM269224.1.1341	6.51175	Actinobacteria	Actinobacteria	Propionibacteriales	Nocardioidaceae	#N/A	#N/A	0.00439857	RF545	B601_f_Nocardioidaceae	Not differential
b8133d4d0048ff8f91224f7c89967c0f	5.17048	Proteobacteria	Deltaproteobacteria	NKB15	uncultured bacterium	uncultured bacterium	uncultured bacterium	0.00438289	RF546	B3018_uncultured bacterium	Not differential
AB487531.1.1320	6.65544	Firmicutes	Clostridia	Clostridiales	Heliobacteriaceae	Hydrogenispora	uncultured Firmicutes bacterium	0.00436825	RF547	B441_Hydrogenispora	Not differential
JF235605.1.1374	4.5326	Proteobacteria	Deltaproteobacteria	Oligoflexales	0319-6G20	uncultured gamma proteobacterium	uncultured gamma proteobacterium	0.00436607	RF548	B3322_uncultured gamma proteobacterium	Not differential
0cd08b1bd5d9b17bdf0576fe84de9ad9	2.19722	Bacteroidetes	Bacteroidia	Chitinophagales	37-13	#N/A	#N/A	0.00436032	RF549	B18428_f_37-13	Not differential
913f980756196a6ce0aa212d6b0716f4	4.40672	Patescibacteria	CPR2	uncultured bacterium	uncultured bacterium	uncultured bacterium	uncultured bacterium	0.00435197	RF550	B5968_uncultured bacterium	Not differential
72336a0f89266a5455d5252506002738	6.3081	Verrucomicrobia	Verrucomicrobiae	Pedosphaerales	Pedosphaeraceae	ADurb.Bin063-1	Verrucomicrobia bacterium ADurb.Bin063	0.00432738	RF551	B1478_ADurb.Bin063-1	Not differential
1bb48ebed254a1571f4e7534fc5f54f7	4.93447	Patescibacteria	Saccharimonadia	Saccharimonadales	uncultured bacterium	uncultured bacterium	uncultured bacterium	0.00432406	RF552	B4778_uncultured bacterium	Not differential
KC432029.1.1380	6.33683	Proteobacteria	Deltaproteobacteria	RCP2-54	uncultured prokaryote	uncultured prokaryote	uncultured prokaryote	0.00431587	RF553	B763_uncultured prokaryote	Not differential
JF266414.1.1376	5.56834	Acidobacteria	Blastocatellia (Subgroup 4)	11-24	uncultured Acidobacteriales bacterium	uncultured Acidobacteriales bacterium	uncultured Acidobacteriales bacterium	0.00430803	RF554	B717_uncultured Acidobacteriales bacterium	Not differential
EF019272.1.1358	7.52941	Actinobacteria	Actinobacteria	Frankiales	uncultured	#N/A	#N/A	0.00430769	RF555	B238_f_uncultured	Non-fer
CU922866.1.1374	9.11669	Acidobacteria	Subgroup 6	uncultured bacterium 213	uncultured bacterium 213	uncultured bacterium 213	uncultured bacterium 213	0.00429692	RF556	B64_uncultured bacterium 213	Non-fer
KY190514.1.1422	6.05678	Chloroflexi	Dehalococcoidia	S085	#N/A	#N/A	#N/A	0.00428803	RF557	B1291_o_S085	Not differential
EU907880.1.1369	5.16479	Armatimonadetes	Fimbriimonadia	Fimbriimonadales	Fimbriimonadaceae	#N/A	#N/A	0.00428509	RF558	B3657_f_Fimbriimonadaceae	Non-fer
JX521039.1.1534	6.92264	Proteobacteria	Deltaproteobacteria	Myxococcales	Polyangiaceae	Aetherobacter	#N/A	0.00428214	RF559	B580_Aetherobacter	Fer
HM346778.1.1211	4.21951	Planctomycetes	Planctomycetacia	Pirellulales	Pirellulaceae	#N/A	#N/A	0.00427579	RF560	B7196_f_Pirellulaceae	Not differential
JF775634.1.1511	6.83303	Actinobacteria	Thermoleophilia	Gaiellales	uncultured	uncultured prokaryote	uncultured prokaryote	0.004275	RF561	B284_uncultured prokaryote	Fer
FJ517700.1.1467	3.97029	Proteobacteria	Deltaproteobacteria	Bdellovibrionales	Bdellovibrionaceae	Bdellovibrio	uncultured Bdellovibrionales bacterium	0.00426603	RF562	B7524_Bdellovibrio	Not differential
EF203188.1.1518	6.75926	Zixibacteria	uncultured bacterium	uncultured bacterium	uncultured bacterium	uncultured bacterium	uncultured bacterium	0.00425897	RF563	B660_uncultured bacterium	Fer
e33401524c8916926d7fd9c9cbd1f0fb	7.15696	Bacteroidetes	Ignavibacteria	Kryptoniales	BSV26	#N/A	#N/A	0.00424971	RF564	B292_f_BSV26	Not differential
LC124691.1.1455	6.18002	Fibrobacteres	Fibrobacteria	Fibrobacterales	possible family 01	#N/A	#N/A	0.00423834	RF565	B1025_f_possible family 01	Not differential
GQ354917.1.1471	5.44674	Chloroflexi	Anaerolineae	Anaerolineales	Anaerolineaceae	uncultured	#N/A	0.0042193	RF566	B1683_uncultured	Not differential
AB364867.1.1454	5.2933	Acidobacteria	Aminicenantia	Aminicenantales	metagenome	metagenome	metagenome	0.00421131	RF567	B443_metagenome	Fer
b8463c573311ad4e96d212bf5603a9cb	5.69709	Proteobacteria	Gammaproteobacteria	KI89A clade	#N/A	#N/A	#N/A	0.00417146	RF568	B866_o_KI89A clade	Not differential
b756d44497e3cdc7d7ea7c1ab42a0dcb	5.93489	Chloroflexi	Anaerolineae	SBR1031	#N/A	#N/A	#N/A	0.00416667	RF569	B590_o_SBR1031	Not differential
LXQJ01000056.13.1537	7.02376	Proteobacteria	Gammaproteobacteria	Xanthomonadales	Xanthomonadaceae	Luteimonas	#N/A	0.00415718	RF570	B329_Luteimonas	Non-fer
EU937916.1.1436	6.11589	Proteobacteria	Gammaproteobacteria	Betaproteobacteriales	Methylophilaceae	Methylotenera	#N/A	0.00415439	RF571	B895_Methylotenera	Fer
HQ330559.1.1396	5.38907	Acidobacteria	Aminicenantia	Aminicenantales	#N/A	#N/A	#N/A	0.00415417	RF572	B3597_o_Aminicenantales	Non-fer
LC124614.1.1455	5.3845	Bacteroidetes	Ignavibacteria	Kryptoniales	BSV26	uncultured Chlorobiales bacterium	uncultured Chlorobiales bacterium	0.00413377	RF573	B1534_uncultured Chlorobiales bacterium	Not differential
JQ684320.1.1266	8.38981	Proteobacteria	Gammaproteobacteria	Betaproteobacteriales	Burkholderiaceae	Noviherbaspirillum	#N/A	0.00413333	RF574	B68_Noviherbaspirillum	Non-fer
JX504981.1.1470	3.82864	Actinobacteria	Thermoleophilia	Gaiellales	uncultured	uncultured Conexibacteraceae bacterium	uncultured Conexibacteraceae bacterium	0.00411301	RF575	B8027_uncultured Conexibacteraceae bacterium	Non-fer
HQ462513.1.1303	3.91202	Gemmatimonadetes	Gemmatimonadetes	Gemmatimonadales	Gemmatimonadaceae	uncultured	uncultured prokaryote	0.00409817	RF576	B4587_uncultured	Not differential
EF515929.1.1461	6.64379	Acidobacteria	Holophagae	Subgroup 7	#N/A	#N/A	#N/A	0.00409743	RF577	B483_o_Subgroup 7	Not differential
KC554691.1.1557	5.53733	Actinobacteria	Actinobacteria	Kineosporiales	Kineosporiaceae	#N/A	#N/A	0.00408622	RF578	B2118_f_Kineosporiaceae	Not differential
FPLS01007476.2.1454	5.04343	Proteobacteria	Gammaproteobacteria	R7C24	#N/A	#N/A	#N/A	0.00407669	RF579	B1462_o_R7C24	Not differential
7ad0b378c55d65231e7838fcb762e1bf	5.44242	Chloroflexi	SHA-26	uncultured Dehalogenimonas sp.	uncultured Dehalogenimonas sp.	uncultured Dehalogenimonas sp.	uncultured Dehalogenimonas sp.	0.00406151	RF580	B1409_uncultured Dehalogenimonas sp.	Not differential
AB672318.1.1476	6.12905	Gemmatimonadetes	S0134 terrestrial group	uncultured bacterium	uncultured bacterium	uncultured bacterium	uncultured bacterium	0.00404482	RF581	B907_uncultured bacterium	Not differential
APMI01060598.167.1635	4.00733	Chloroflexi	Anaerolineae	SBR1031	wastewater metagenome	wastewater metagenome	wastewater metagenome	0.00403803	RF582	B7136_wastewater metagenome	Not differential
FPLL01000557.16.1508	5.34233	Gemmatimonadetes	Gemmatimonadetes	Gemmatimonadales	Gemmatimonadaceae	uncultured	metagenome	0.00403075	RF583	B1032_uncultured	Non-fer
AB754148.1.1436	6.65544	Firmicutes	Clostridia	Clostridiales	Ruminococcaceae	#N/A	#N/A	0.00402566	RF584	B1045_f_Ruminococcaceae	Fer
26cf05447f2e7fb05911ba820a52b4f4	4.17439	Chloroflexi	Anaerolineae	SBR1031	#N/A	#N/A	#N/A	0.00401389	RF585	B2758_o_SBR1031	Fer
GU983332.1.1357	4.94164	Acidobacteria	Acidobacteriia	Solibacterales	Solibacteraceae (Subgroup 3)	Bryobacter	uncultured Acidobacteriales bacterium	0.004	RF586	B599_Bryobacter	Non-fer
JN397783.1.1446	5.03695	Bacteroidetes	Bacteroidia	Bacteroidales	#N/A	#N/A	#N/A	0.004	RF587	B4173_o_Bacteroidales	Not differential
EU861840.1.1445	4.12713	Chloroflexi	Chloroflexia	Kallotenuales	AKIW781	uncultured soil bacterium	uncultured soil bacterium	0.00399571	RF588	B3780_uncultured soil bacterium	Not differential
KC763876.1.1305	6.27852	Planctomycetes	Phycisphaerae	MSBL9	SG8-4	uncultured planctomycete	uncultured planctomycete	0.0039944	RF589	B287_uncultured planctomycete	Not differential
KF063112.1.1355	5.743	Bacteroidetes	Bacteroidia	Cytophagales	Cytophagaceae	Cytophaga	Cytophaga aurantiaca DSM 3654	0.00398831	RF590	B3022_Cytophaga	Non-fer
KC245145.1.1378	6.66058	Bacteroidetes	Bacteroidia	Flavobacteriales	Flavobacteriaceae	Flavobacterium	#N/A	0.00398701	RF591	B1547_Flavobacterium	Not differential
GQ487973.1.1449	7.37337	Chloroflexi	Anaerolineae	RBG-13-54-9	#N/A	#N/A	#N/A	0.00398649	RF592	B236_o_RBG-13-54-9	Non-fer
AJ390475.1.1330	5.57973	Planctomycetes	Planctomycetacia	Pirellulales	Pirellulaceae	Pir2 lineage	uncultured bacterium	0.00395016	RF593	B1473_Pir2 lineage	Non-fer
KF956782.1.1473	5.00395	Acidobacteria	Acidobacteriia	Subgroup 13	uncultured Solibacterales bacterium	uncultured Solibacterales bacterium	uncultured Solibacterales bacterium	0.0039366	RF594	B3528_uncultured Solibacterales bacterium	Non-fer
2d2bd94291fec6b08d649948eca3a431	4.99043	Omnitrophicaeota	uncultured bacterium	uncultured bacterium	uncultured bacterium	uncultured bacterium	uncultured bacterium	0.00393333	RF595	B4896_uncultured bacterium	Fer
78d533e2d9a07856f7b682238b9d18f5	3.43399	#N/A	#N/A	#N/A	#N/A	#N/A	#N/A	0.00393323	RF596	B7330_o_NA	Non-fer
7d0d098fa603987f95ac2c1329360da3	6.90875	Proteobacteria	Gammaproteobacteria	Betaproteobacteriales	#N/A	#N/A	#N/A	0.00392308	RF597	B367_o_Betaproteobacteriales	Non-fer
HM240922.1.1307	8.40223	Proteobacteria	Alphaproteobacteria	Sphingomonadales	Sphingomonadaceae	Sphingomonas	#N/A	0.00389944	RF598	B30_Sphingomonas	Non-fer
FPLS01018227.1.1369	3.85015	Bacteroidetes	Ignavibacteria	OPB56	uncultured Chlorobiales bacterium	uncultured Chlorobiales bacterium	uncultured Chlorobiales bacterium	0.00389783	RF599	B7111_uncultured Chlorobiales bacterium	Not differential
5d22088fd68af8c4928b2b0cadf588bb	5.23111	Verrucomicrobia	Verrucomicrobiae	Pedosphaerales	Pedosphaeraceae	bacterium enrichment culture clone auto67_4W	bacterium enrichment culture clone auto67_4W	0.00388246	RF600	B1381_bacterium enrichment culture clone auto67_4W	Not differential
cbad99623624696a373f32d98ce34418	6.59851	Chloroflexi	Anaerolineae	Anaerolineales	Anaerolineaceae	uncultured	#N/A	0.00386807	RF601	B854_uncultured	Not differential
FJ810558.1.1516	4.91265	Zixibacteria	uncultured prokaryote	uncultured prokaryote	uncultured prokaryote	uncultured prokaryote	uncultured prokaryote	0.00384955	RF602	B6470_uncultured prokaryote	Not differential
9a2d9c8b920760675e82e03c180d2dca	3.04452	Bacteroidetes	Ignavibacteria	Kryptoniales	BSV26	#N/A	#N/A	0.0038486	RF603	B8948_f_BSV26	Not differential
289932287107107260e37aa17cbe31d6	5.273	Armatimonadetes	DG-56	uncultured bacterium	uncultured bacterium	uncultured bacterium	uncultured bacterium	0.00384524	RF604	B1897_uncultured bacterium	Not differential
JN540191.1.1299	6.28227	Nitrospirae	Thermodesulfovibrionia	uncultured	uncultured Sphingobacteriales bacterium	uncultured Sphingobacteriales bacterium	uncultured Sphingobacteriales bacterium	0.00383274	RF605	B1643_uncultured Sphingobacteriales bacterium	Fer
EU150268.1.1200	5.05625	Proteobacteria	Gammaproteobacteria	WD260	uncultured eubacterium WD260	uncultured eubacterium WD260	uncultured eubacterium WD260	0.00382954	RF606	B2102_uncultured eubacterium WD260	Fer
FPLM01006277.2.1421	6.05444	Proteobacteria	Deltaproteobacteria	Syntrophobacterales	Syntrophaceae	Syntrophus	#N/A	0.00381579	RF607	B1234_Syntrophus	Non-fer
a7930601c0b02a45b66be73bb4c6fb0a	5.0689	Proteobacteria	Deltaproteobacteria	Myxococcales	KD3-10	metagenome	metagenome	0.00381429	RF608	B2362_metagenome	Not differential
GU208424.1.1468	3.89182	Omnitrophicaeota	Omnitrophia	Omnitrophales	Omnitrophaceae	Candidatus Omnitrophus	uncultured prokaryote	0.00381421	RF609	B3037_Candidatus Omnitrophus	Non-fer
HQ674845.1.1526	5.58725	Proteobacteria	Deltaproteobacteria	Myxococcales	Archangiaceae	Anaeromyxobacter	uncultured delta proteobacterium	0.00381184	RF610	B1120_Anaeromyxobacter	Non-fer
81670d1645a0d86641c4b9375b105295	4.60517	Planctomycetes	Phycisphaerae	Phycisphaerales	AKAU3564 sediment group	uncultured soil bacterium	uncultured soil bacterium	0.00380587	RF611	B2191_uncultured soil bacterium	Non-fer
AJ390458.1.1363	6.16752	Latescibacteria	uncultured soil bacterium PBS-III-30	uncultured soil bacterium PBS-III-30	uncultured soil bacterium PBS-III-30	uncultured soil bacterium PBS-III-30	uncultured soil bacterium PBS-III-30	0.00380545	RF612	B883_uncultured soil bacterium PBS-III-30	Non-fer
730e67d066277b67f86805d8c31bb18c	6.24028	Proteobacteria	#N/A	#N/A	#N/A	#N/A	#N/A	0.00379909	RF613	B1863_o_NA	Not differential
AB821134.1.1422	4.5326	Proteobacteria	Alphaproteobacteria	Dongiales	Dongiaceae	Dongia	bacterium Ellin314	0.00378333	RF614	B1511_Dongia	Non-fer
ec692f2ff873cf8042bb5e47a3b59364	6.47389	Chloroflexi	Anaerolineae	Anaerolineales	Anaerolineaceae	uncultured	#N/A	0.00377318	RF615	B729_uncultured	Fer
23fa442b111bfb695d739c82c4bbe007	4.57471	Bacteroidetes	Ignavibacteria	Kryptoniales	MSB-3C8	uncultured bacterium	uncultured bacterium	0.00376442	RF616	B1868_uncultured bacterium	Not differential
c4f0603c29db0c8882c18de340e5d942	4.70953	Cyanobacteria	Sericytochromatia	uncultured bacterium	uncultured bacterium	uncultured bacterium	uncultured bacterium	0.00376111	RF617	B3628_uncultured bacterium	Not differential
LN570914.1.1386	3.78419	Proteobacteria	Deltaproteobacteria	Oligoflexales	0319-6G20	uncultured bacterium	uncultured bacterium	0.00376007	RF618	B8876_uncultured bacterium	Non-fer
JF027785.1.1358	7.63337	Actinobacteria	Actinobacteria	Propionibacteriales	Nocardioidaceae	Nocardioides	#N/A	0.00375893	RF619	B221_Nocardioides	Not differential
666dab84c644590dca1c4b81dd77ffda	7.22548	Nitrospirae	Thermodesulfovibrionia	uncultured	uncultured bacterium	uncultured bacterium	uncultured bacterium	0.00375338	RF620	B835_uncultured bacterium	Not differential
FJ006912.1.1406	6.48158	Actinobacteria	Actinobacteria	Micrococcales	Intrasporangiaceae	Terrabacter	#N/A	0.00375278	RF621	B187_Terrabacter	Not differential
FPLP01007343.5.1500	4.91265	Spirochaetes	Leptospirae	Leptospirales	Leptospiraceae	Turneriella	#N/A	0.00375234	RF622	B2597_Turneriella	Not differential
JX840388.1.1408	5.84644	Proteobacteria	Alphaproteobacteria	Rhizobiales	Beijerinckiaceae	Microvirga	#N/A	0.00375	RF623	B2306_Microvirga	Non-fer
e5a3e85aef1660eba6140b51cddc390b	4.77068	Acidobacteria	Acidobacteriia	Subgroup 12	uncultured bacterium	uncultured bacterium	uncultured bacterium	0.00373965	RF624	B1089_uncultured bacterium	Non-fer
39c5e2e44603f5ed068e4e59407e38a4	6.13988	Chloroflexi	Chloroflexia	Chloroflexales	Roseiflexaceae	uncultured	uncultured bacterium	0.00373887	RF625	B554_uncultured	Not differential
6352a41823129025ec76c917da5948e6	4.55388	Verrucomicrobia	Verrucomicrobiae	S-BQ2-57 soil group	uncultured bacterium	uncultured bacterium	uncultured bacterium	0.00373716	RF626	B4104_uncultured bacterium	Fer
KC541348.1.1555	3.58352	Acidobacteria	Subgroup 25	uncultured bacterium	uncultured bacterium	uncultured bacterium	uncultured bacterium	0.00371786	RF627	B7441_uncultured bacterium	Not differential
851322d0c7efb7e8e6bb3570fdccfe33	0.693147	#N/A	#N/A	#N/A	#N/A	#N/A	#N/A	0.0037	RF628	B20886_o_NA	Not differential
KJ540834.1.1409	7.40489	Proteobacteria	Alphaproteobacteria	Sphingomonadales	Sphingomonadaceae	Sphingomonas	#N/A	0.00369328	RF629	B974_Sphingomonas	Not differential
28a2640bf2f4eefc87ac6f666f6d0af2	3.52636	Gemmatimonadetes	Gemmatimonadetes	Gemmatimonadales	Gemmatimonadaceae	#N/A	#N/A	0.00369297	RF630	B12748_f_Gemmatimonadaceae	Non-fer
AB488282.1.1368	5.23644	Firmicutes	Clostridia	Clostridiales	Heliobacteriaceae	Hydrogenispora	uncultured Firmicutes bacterium	0.00369048	RF631	B1504_Hydrogenispora	Fer
f2212705fc0b3801a93eaabcab28370d	4.55388	Latescibacteria	#N/A	#N/A	#N/A	#N/A	#N/A	0.00368651	RF632	B1522_o_NA	Fer
589dd6505de5d9f7e4b78e7409826ebe	5.16479	WS2	uncultured Firmicutes bacterium	uncultured Firmicutes bacterium	uncultured Firmicutes bacterium	uncultured Firmicutes bacterium	uncultured Firmicutes bacterium	0.00368056	RF633	B1995_uncultured Firmicutes bacterium	Not differential
b82833796b2bff00569d5222e6e4c10e	6.19848	Chloroflexi	SHA-26	uncultured bacterium	uncultured bacterium	uncultured bacterium	uncultured bacterium	0.00367178	RF634	B1105_uncultured bacterium	Non-fer
EF451637.1.1317	7.23634	Proteobacteria	Alphaproteobacteria	Sphingomonadales	Sphingomonadaceae	Sphingomonas	#N/A	0.00366667	RF635	B1080_Sphingomonas	Fer
JF833593.1.1428	7.73412	Actinobacteria	Actinobacteria	Corynebacteriales	Mycobacteriaceae	Mycobacterium	#N/A	0.00366228	RF636	B62_Mycobacterium	Not differential
AB630555.1.1425	5.81711	Chloroflexi	Anaerolineae	Anaerolineales	Anaerolineaceae	Anaerolinea	uncultured Anaerolineaceae bacterium	0.003648	RF637	B1539_Anaerolinea	Not differential
JF833475.1.1465	7.26333	Verrucomicrobia	Verrucomicrobiae	Chthoniobacterales	Chthoniobacteraceae	Candidatus Udaeobacter	#N/A	0.00364683	RF638	B746_Candidatus Udaeobacter	Fer
JX504958.1.1412	8.93274	Proteobacteria	Alphaproteobacteria	Rhizobiales	Xanthobacteraceae	#N/A	#N/A	0.00364545	RF639	B26_f_Xanthobacteraceae	Non-fer
JF775628.1.1474	8.38206	Chloroflexi	Anaerolineae	Anaerolineales	Anaerolineaceae	RBG-16-58-14	uncultured bacterium	0.00363305	RF640	B91_RBG-16-58-14	Non-fer
FPLL01001481.10.1514	4.41884	Bacteroidetes	Bacteroidia	Sphingobacteriales	env.OPS 17	metagenome	metagenome	0.00362019	RF641	B4355_metagenome	Not differential
KX508079.1.1490	6.00389	Proteobacteria	Gammaproteobacteria	Betaproteobacteriales	Burkholderiaceae	#N/A	#N/A	0.00361603	RF642	B1766_f_Burkholderiaceae	Fer
1d18b62c2c563fbe725e664c3d8f3ecf	4.96981	Chloroflexi	Anaerolineae	Anaerolineales	Anaerolineaceae	Anaerolinea	#N/A	0.00361087	RF643	B6236_Anaerolinea	Non-fer
JF265831.1.1360	6.62007	Proteobacteria	Gammaproteobacteria	Betaproteobacteriales	Nitrosomonadaceae	MND1	uncultured Rhodocyclaceae bacterium	0.00360119	RF644	B754_MND1	Non-fer
KX505017.1.1530	5.8999	Proteobacteria	Deltaproteobacteria	Sva0485	uncultured Spirochaetales bacterium	uncultured Spirochaetales bacterium	uncultured Spirochaetales bacterium	0.00358611	RF645	B427_uncultured Spirochaetales bacterium	Non-fer
a297dc48da1f0486283806a8f3c47773	7.10497	Chloroflexi	Anaerolineae	SBR1031	uncultured Gemmatimonadetes bacterium	uncultured Gemmatimonadetes bacterium	uncultured Gemmatimonadetes bacterium	0.00358512	RF646	B281_uncultured Gemmatimonadetes bacterium	Fer
JN869091.1.1482	7.2145	Proteobacteria	Alphaproteobacteria	Rhizobiales	Rhizobiales Incertae Sedis	uncultured	#N/A	0.00358194	RF647	B371_uncultured	Not differential
fe9e6b18a1dbd2140e625f341f9d39d4	4.77912	Acidobacteria	Subgroup 11	uncultured Acidobacteria bacterium	uncultured Acidobacteria bacterium	uncultured Acidobacteria bacterium	uncultured Acidobacteria bacterium	0.00357466	RF648	B3016_uncultured Acidobacteria bacterium	Not differential
DQ083119.1.1512	5.63121	Acidobacteria	Subgroup 6	unidentified	unidentified	unidentified	unidentified	0.00356548	RF649	B701_unidentified	Non-fer
d888610ef63dcce693de261f407071d7	5.18178	Chloroflexi	Anaerolineae	SBR1031	uncultured Gemmatimonadetes bacterium	uncultured Gemmatimonadetes bacterium	uncultured Gemmatimonadetes bacterium	0.00355827	RF650	B1870_uncultured Gemmatimonadetes bacterium	Not differential
KC432436.1.1344	4.95583	Cyanobacteria	Melainabacteria	Gastranaerophilales	#N/A	#N/A	#N/A	0.00355263	RF651	B3886_o_Gastranaerophilales	Not differential
JQ426533.1.1497	6.88755	Proteobacteria	Gammaproteobacteria	Xanthomonadales	Xanthomonadaceae	Arenimonas	#N/A	0.00354727	RF652	B663_Arenimonas	Non-fer
754b09cb2a99a26c6bb92bdc44eed130	3.09104	Hydrogenedentes	Hydrogenedentia	Hydrogenedentiales	Hydrogenedensaceae	#N/A	#N/A	0.00352724	RF653	B14858_f_Hydrogenedensaceae	Non-fer
AB672167.1.1478	5.52943	Acidobacteria	Holophagae	Subgroup 7	uncultured Desulfovirga sp.	uncultured Desulfovirga sp.	uncultured Desulfovirga sp.	0.00352222	RF654	B414_uncultured Desulfovirga sp.	Not differential
d94800ca66a176d7e591ed018e6c1744	5.78074	Acidobacteria	Thermoanaerobaculia	Thermoanaerobaculales	Thermoanaerobaculaceae	Subgroup 10	#N/A	0.00351246	RF655	B2087_Subgroup 10	Non-fer
9a45e6a03e50e230242b437ae05ab6cc	1.38629	Chloroflexi	Anaerolineae	RBG-13-54-9	#N/A	#N/A	#N/A	0.0035119	RF656	B20939_o_RBG-13-54-9	Not differential
a2c76fb1140d8504a822ad44386f23a0	4.17439	Proteobacteria	Gammaproteobacteria	Cellvibrionales	Porticoccaceae	Porticoccus	metagenome	0.00350833	RF657	B8565_Porticoccus	Not differential
70087c25c1ea97b4aaf8099276cb14a9	4.82831	Planctomycetes	Phycisphaerae	Phycisphaerales	AKAU3564 sediment group	uncultured organism	uncultured organism	0.00350769	RF658	B1849_uncultured organism	Fer
FQ659333.1.1322	5.7462	Chloroflexi	Anaerolineae	Anaerolineales	Anaerolineaceae	Leptolinea	uncultured soil bacterium	0.00350455	RF659	B987_Leptolinea	Not differential
EU135251.1.1375	5.56068	Planctomycetes	Planctomycetacia	Gemmatales	Gemmataceae	uncultured	uncultured bacterium	0.00348735	RF660	B1000_uncultured	Not differential
JX133443.1.1455	4.48864	Chloroflexi	Anaerolineae	SBR1031	A4b	uncultured bacterium	uncultured bacterium	0.00348056	RF661	B2070_uncultured bacterium	Non-fer
EU133641.1.1362	6.2804	Bacteroidetes	Bacteroidia	Chitinophagales	Chitinophagaceae	#N/A	#N/A	0.00347802	RF662	B794_f_Chitinophagaceae	Non-fer
045a4bce4efea51b1178f8a6d8f4f52c	4.36945	Acidobacteria	Subgroup 25	uncultured soil bacterium	uncultured soil bacterium	uncultured soil bacterium	uncultured soil bacterium	0.003475	RF663	B3503_uncultured soil bacterium	Non-fer
KP745120.1.1454	3.95124	Bacteroidetes	Bacteroidia	Chitinophagales	Chitinophagaceae	#N/A	#N/A	0.00346954	RF664	B3279_f_Chitinophagaceae	Fer
9d47f59e5165b1c1c887259686dfd2f4	5.2832	Bacteroidetes	Ignavibacteria	Kryptoniales	BSV26	Ignavibacteria bacterium RIFCSPLOWO2_12_FULL_56_21	Ignavibacteria bacterium RIFCSPLOWO2_12_FULL_56_21	0.00346917	RF665	B1637_Ignavibacteria bacterium RIFCSPLOWO2_12_FULL_56_21	Non-fer
AY913612.1.1283	6.52649	Acidobacteria	Acidobacteriia	Acidobacteriales	uncultured	uncultured forest soil bacterium	uncultured forest soil bacterium	0.0034568	RF666	B1020_uncultured forest soil bacterium	Not differential
HE648192.1.1508	6.52503	Proteobacteria	Gammaproteobacteria	Xanthomonadales	Xanthomonadaceae	Arenimonas	uncultured prokaryote	0.0034528	RF667	B710_Arenimonas	Not differential
FPLP01007043.15.1497	3.97029	Bacteroidetes	Bacteroidia	Sphingobacteriales	env.OPS 17	metagenome	metagenome	0.00344192	RF668	B9042_metagenome	Not differential
KX504969.1.1523	4.7362	Proteobacteria	Deltaproteobacteria	Myxococcales	mle1-27	uncultured bacterium	uncultured bacterium	0.0034375	RF669	B2156_uncultured bacterium	Not differential
FPLS01019290.18.1487	5.03044	Proteobacteria	Alphaproteobacteria	uncultured	alpha proteobacterium LWH5	alpha proteobacterium LWH5	alpha proteobacterium LWH5	0.0034375	RF670	B1558_alpha proteobacterium LWH5	Not differential
AB630854.1.1444	5.34233	Actinobacteria	Acidimicrobiia	#N/A	#N/A	#N/A	#N/A	0.00343527	RF671	B2302_o_NA	Not differential
8be2bd07dd259cbe9dcfcbf3e271997c	3.46574	Proteobacteria	Gammaproteobacteria	Diplorickettsiales	Diplorickettsiaceae	uncultured	bacterium enrichment culture clone B61(2011)	0.00341667	RF672	B9476_uncultured	Fer
JF729057.1.1292	5.59471	Chloroflexi	JG30-KF-CM66	#N/A	#N/A	#N/A	#N/A	0.00341296	RF673	B1806_o_NA	Not differential
KY190707.1.1459	5.24175	Verrucomicrobia	Verrucomicrobiae	Verrucomicrobiales	Verrucomicrobiaceae	Verrucomicrobium	#N/A	0.00340909	RF674	B3413_Verrucomicrobium	Not differential
29006b826071873448391ebe0ba2425e	3.8712	Chloroflexi	Anaerolineae	SBR1031	uncultured Gemmatimonadetes bacterium	uncultured Gemmatimonadetes bacterium	uncultured Gemmatimonadetes bacterium	0.00339624	RF675	B6908_uncultured Gemmatimonadetes bacterium	Not differential
FPLS01007492.16.1488	3.52636	Proteobacteria	Alphaproteobacteria	#N/A	#N/A	#N/A	#N/A	0.00338492	RF676	B6964_o_NA	Fer
JX828423.1.1511	4.51086	Proteobacteria	Deltaproteobacteria	Desulfovibrionales	Desulfovibrionaceae	Desulfovibrio	Desulfovibrio sp. enrichment culture clone AP-FeEnrich15	0.00338333	RF677	B2272_Desulfovibrio	Not differential
AB294335.1.1422	3.93183	Proteobacteria	Deltaproteobacteria	Bdellovibrionales	Bdellovibrionaceae	Bdellovibrio	uncultured bacterium	0.00338333	RF678	B9620_Bdellovibrio	Fer
FJ432487.1.1253	5.14749	Bacteroidetes	Bacteroidia	Chitinophagales	uncultured	metagenome	metagenome	0.00337868	RF679	B4499_metagenome	Not differential
2c2fd12064d0221c35f108c2822a5713	5.6058	Chloroflexi	Dehalococcoidia	Dehalococcoidales	uncultured	uncultured bacterium	uncultured bacterium	0.0033762	RF680	B1569_uncultured bacterium	Fer
HQ119166.1.1527	5.41165	Acidobacteria	Thermoanaerobaculia	Thermoanaerobaculales	Thermoanaerobaculaceae	Subgroup 10	#N/A	0.0033697	RF681	B1413_Subgroup 10	Not differential
EF019039.1.1332	8.01202	Proteobacteria	Alphaproteobacteria	Micropepsales	Micropepsaceae	#N/A	#N/A	0.00336827	RF682	B94_f_Micropepsaceae	Not differential
d0f4436fb3f0c70585fe19405f4833bf	5.09375	Gemmatimonadetes	S0134 terrestrial group	uncultured Gemmatimonadetes bacterium	uncultured Gemmatimonadetes bacterium	uncultured Gemmatimonadetes bacterium	uncultured Gemmatimonadetes bacterium	0.00336557	RF683	B1408_uncultured Gemmatimonadetes bacterium	Non-fer
adb8471b4f7b6a8d8cd45379597e8aee	4.35671	Proteobacteria	Deltaproteobacteria	Sva0485	uncultured prokaryote	uncultured prokaryote	uncultured prokaryote	0.00336275	RF684	B3717_uncultured prokaryote	Not differential
JQ798430.1.1449	4.86753	Proteobacteria	Alphaproteobacteria	Rhizobiales	A0839	uncultured proteobacterium	uncultured proteobacterium	0.00336058	RF685	B2469_uncultured proteobacterium	Non-fer
AF523969.1.1317	5.96101	Proteobacteria	Deltaproteobacteria	Deltaproteobacteria Incertae Sedis	Syntrophorhabdaceae	Syntrophorhabdus	#N/A	0.00335599	RF686	B1319_Syntrophorhabdus	Not differential
GU983350.1.1403	4.54329	Fibrobacteres	Fibrobacteria	Fibrobacterales	Fibrobacteraceae	possible genus 04	uncultured bacterium	0.0033547	RF687	B5164_possible genus 04	Non-fer
KM410437.1.1389	7.67136	Proteobacteria	Gammaproteobacteria	Betaproteobacteriales	Hydrogenophilaceae	Thiobacillus	#N/A	0.00335307	RF688	B55_Thiobacillus	Non-fer
FPLS01057431.13.1480	5.0689	Bacteroidetes	Bacteroidia	Chitinophagales	Chitinophagaceae	uncultured	bacterium	0.00335	RF689	B5278_uncultured	Not differential
AF529116.1.1462	3.66356	Firmicutes	Clostridia	Clostridiales	Syntrophomonadaceae	Syntrophomonas	uncultured Gram-positive bacterium	0.00334659	RF690	B12128_Syntrophomonas	Not differential
9096d22cf44c6fc9541473b38b48b6c5	7.86096	Proteobacteria	Deltaproteobacteria	Sva0485	#N/A	#N/A	#N/A	0.00333129	RF691	B200_o_Sva0485	Non-fer
FQ659735.1.1286	6.14633	Proteobacteria	Alphaproteobacteria	Caulobacterales	Hyphomonadaceae	SWB02	uncultured soil bacterium	0.00332564	RF692	B958_SWB02	Not differential
JN207191.1.1266	5.83188	Elusimicrobia	Elusimicrobia	Lineage IV	uncultured Termite group 1 bacterium	uncultured Termite group 1 bacterium	uncultured Termite group 1 bacterium	0.00331692	RF693	B1217_uncultured Termite group 1 bacterium	Non-fer
f54ece7632d4d748ebd7e84218499b60	3.49651	#N/A	#N/A	#N/A	#N/A	#N/A	#N/A	0.00331692	RF694	B1676_o_NA	Not differential
01d8346f8bb03d2a4d0b4d67dc208682	3.7612	Chloroflexi	Chloroflexia	Chloroflexales	Roseiflexaceae	uncultured	uncultured bacterium	0.00331362	RF695	B8650_uncultured	Not differential
JQ861402.1.1495	4.7362	Bacteroidetes	Bacteroidia	Chitinophagales	Chitinophagaceae	uncultured	bacterium	0.00330543	RF696	B3380_uncultured	Not differential
JQ978556.1.1520	6.44254	Proteobacteria	Gammaproteobacteria	Gammaproteobacteria Incertae Sedis	Unknown Family	Candidatus Berkiella	uncultured bacterium	0.00330044	RF697	B964_Candidatus Berkiella	Fer
a986d6c068ec4ed53fa49d2c499886ac	2.19722	Proteobacteria	Deltaproteobacteria	Myxococcales	#N/A	#N/A	#N/A	0.00329832	RF698	B18626_o_Myxococcales	Non-fer
f0cc8b4e81bf53941a6e37b8bd570d79	2.07944	Chloroflexi	Chloroflexia	Chloroflexales	Roseiflexaceae	uncultured	uncultured bacterium	0.00328333	RF699	B16712_uncultured	Not differential
JX224021.1.1356	7.73762	Proteobacteria	Deltaproteobacteria	Desulfuromonadales	Geobacteraceae	Geobacter	uncultured Desulfuromonadales bacterium	0.00328097	RF700	B307_Geobacter	Non-fer
AJ863290.1.1477	5.57973	Proteobacteria	Deltaproteobacteria	Oligoflexales	0319-6G20	uncultured Syntrophobacteraceae bacterium	uncultured Syntrophobacteraceae bacterium	0.00327521	RF701	B3577_uncultured Syntrophobacteraceae bacterium	Non-fer
KP204499.1.1451	4.39445	Cyanobacteria	Oxyphotobacteria	Synechococcales	Synechococcaceae	uncultured	uncultured bacterium	0.003275	RF702	B5753_uncultured	Non-fer
618452703f32625679be7c278eceaba3	4.82831	Latescibacteria	Latescibacteria	Latescibacterales	Latescibacteraceae	metagenome	metagenome	0.003275	RF703	B3504_metagenome	Not differential
bf68d2be564ca6b886743a9dc02781cc	5.64545	Chloroflexi	Anaerolineae	SBR1031	A4b	uncultured bacterium	uncultured bacterium	0.00327222	RF704	B875_uncultured bacterium	Non-fer
GQ339170.1.1501	7.00125	Proteobacteria	Gammaproteobacteria	Betaproteobacteriales	Gallionellaceae	Sideroxydans	#N/A	0.00325897	RF705	B800_Sideroxydans	Not differential
AY922145.1.1331	3.7612	Patescibacteria	Saccharimonadia	Saccharimonadales	uncultured soil bacterium	uncultured soil bacterium	uncultured soil bacterium	0.00325417	RF706	B2906_uncultured soil bacterium	Not differential
HE804558.1.1464	1.79176	BRC1	#N/A	#N/A	#N/A	#N/A	#N/A	0.0032529	RF707	B6581_o_NA	Not differential
KC431923.1.1379	6.35611	Proteobacteria	Deltaproteobacteria	Desulfarculales	Desulfarculaceae	uncultured	metagenome	0.00325	RF708	B1263_uncultured	Not differential
8a5602397c3fa78a4a90e22a4120cb2f	3.52636	Chloroflexi	Dehalococcoidia	#N/A	#N/A	#N/A	#N/A	0.00323889	RF709	B12783_o_NA	Not differential
JF175246.1.1371	6.42972	Proteobacteria	Deltaproteobacteria	Myxococcales	Haliangiaceae	Haliangium	#N/A	0.00323618	RF710	B1948_Haliangium	Fer
KU519603.1.1436	7.24423	Verrucomicrobia	Verrucomicrobiae	Pedosphaerales	Pedosphaeraceae	ADurb.Bin063-1	uncultured Verrucomicrobia bacterium	0.00323333	RF711	B99_ADurb.Bin063-1	Non-fer
b3a8e16c77b0858bd6c7224d4d629529	3.82864	Proteobacteria	Gammaproteobacteria	Salinisphaerales	Solimonadaceae	Alkanibacter	gamma proteobacterium W1.09-152	0.00322652	RF712	B5326_Alkanibacter	Not differential
c35bc3ee8b37e34144356edb5f93b011	1.60944	Dependentiae	Babeliae	Babeliales	UBA12409	uncultured bacterium	uncultured bacterium	0.00321992	RF713	B20420_uncultured bacterium	Not differential
6840b8e749d96367bd4e9c8b06c54dbc	4.39445	Chloroflexi	Anaerolineae	RBG-13-54-9	uncultured Caldilineaceae bacterium	uncultured Caldilineaceae bacterium	uncultured Caldilineaceae bacterium	0.00321918	RF714	B1943_uncultured Caldilineaceae bacterium	Not differential
AY922044.1.1353	8.69232	Chloroflexi	KD4-96	metagenome	metagenome	metagenome	metagenome	0.00321111	RF715	B31_metagenome	Fer
7237c43b05efd810e51438cfa3305fec	4.36945	Acidobacteria	Subgroup 25	uncultured Acidobacteria bacterium	uncultured Acidobacteria bacterium	uncultured Acidobacteria bacterium	uncultured Acidobacteria bacterium	0.00320879	RF716	B2103_uncultured Acidobacteria bacterium	Fer
KC331386.1.1483	5.60212	Bacteroidetes	Bacteroidia	Sphingobacteriales	AKYH767	uncultured bacterium	uncultured bacterium	0.00319305	RF717	B1236_uncultured bacterium	Not differential
AB240491.1.1488	5.47646	Bacteroidetes	Bacteroidia	Bacteroidales	Paludibacteraceae	uncultured	uncultured soil bacterium	0.0031913	RF718	B1223_uncultured	Non-fer
3d986a5d47d7ba133d2b2406b4945216	4.46591	#N/A	#N/A	#N/A	#N/A	#N/A	#N/A	0.00318739	RF719	B1878_o_NA	Not differential
KC442629.1.1355	6.99851	Actinobacteria	Thermoleophilia	Gaiellales	#N/A	#N/A	#N/A	0.00316369	RF720	B568_o_Gaiellales	Fer
FPLS01038502.17.1246	5.273	Bacteroidetes	Bacteroidia	Sphingobacteriales	KD3-93	#N/A	#N/A	0.00316315	RF721	B2651_f_KD3-93	Non-fer
42d433d17b9d7161a51c758b0cefe4ae	4.54329	Chloroflexi	Anaerolineae	RBG-13-54-9	#N/A	#N/A	#N/A	0.0031629	RF722	B2710_o_RBG-13-54-9	Not differential
1bff250a2a34160f35c1c3d75c34736d	4.60517	Proteobacteria	Deltaproteobacteria	Deltaproteobacteria Incertae Sedis	Unknown Family	Deferrisoma	uncultured bacterium	0.00314771	RF723	B3730_Deferrisoma	Non-fer
7d54c89fd77e6ff156ef309abc9627c4	5.50126	Proteobacteria	Deltaproteobacteria	PB19	uncultured Desulfuromonadales bacterium	uncultured Desulfuromonadales bacterium	uncultured Desulfuromonadales bacterium	0.00313889	RF724	B1589_uncultured Desulfuromonadales bacterium	Not differential
HM269169.1.1338	6.4892	Actinobacteria	Acidimicrobiia	IMCC26256	#N/A	#N/A	#N/A	0.00313706	RF725	B848_o_IMCC26256	Not differential
FN824928.1.1312	6.38182	Proteobacteria	Deltaproteobacteria	Desulfuromonadales	Geobacteraceae	Geobacter	Geobacter pelophilus	0.003125	RF726	B1988_Geobacter	Not differential
8dc3db2f91b3fa2c18c5fc8963aed658	3.58352	#N/A	#N/A	#N/A	#N/A	#N/A	#N/A	0.00312039	RF727	B7368_o_NA	Not differential
f0498b4589937fb529ad07fe1dba6fd5	5.55296	Fibrobacteres	Fibrobacteria	Fibrobacterales	B122	uncultured bacterium	uncultured bacterium	0.00311429	RF728	B2373_uncultured bacterium	Non-fer
bdf06483bd9b943e4c523ee9c3be460c	3.91202	Acidobacteria	Subgroup 25	#N/A	#N/A	#N/A	#N/A	0.00311111	RF729	B2101_o_NA	Not differential
JX001221.1.1476	7.06048	Proteobacteria	Deltaproteobacteria	Myxococcales	BIrii41	uncultured Sorangiineae bacterium	uncultured Sorangiineae bacterium	0.00310897	RF730	B203_uncultured Sorangiineae bacterium	Not differential
3f6d887acf9e0fc95eb3011bf7e495f0	4.63473	Chloroflexi	Chloroflexia	Thermomicrobiales	JG30-KF-CM45	#N/A	#N/A	0.0031071	RF731	B1755_f_JG30-KF-CM45	Not differential
EF509349.1.1494	6.6796	Bacteroidetes	Bacteroidia	Flavobacteriales	Flavobacteriaceae	Myroides	uncultured bacterium	0.00310635	RF732	B1848_Myroides	Non-fer
ABSQ01001477.375.1869	7.17242	Actinobacteria	Thermoleophilia	Gaiellales	#N/A	#N/A	#N/A	0.00309524	RF733	B993_o_Gaiellales	Not differential
FJ621550.1.1302	5.83481	Rokubacteria	NC10	Methylomirabilales	Methylomirabilaceae	Sh765B-TzT-35	NC10 bacterium enrichment culture clone Ino-F12	0.00308929	RF734	B1368_Sh765B-TzT-35	Not differential
cf2ae9113af0de9d6211bf04ef2f0ea3	5.36129	Acidobacteria	Subgroup 11	uncultured Acidobacterium sp.	uncultured Acidobacterium sp.	uncultured Acidobacterium sp.	uncultured Acidobacterium sp.	0.00308171	RF735	B1919_uncultured Acidobacterium sp.	Fer
df8294f13a212355dc986ed57d94fed6	4.56435	#N/A	#N/A	#N/A	#N/A	#N/A	#N/A	0.00307769	RF736	B3257_o_NA	Not differential
087caf4b77a2016189da8c3f0f93405a	3.43399	Acidobacteria	Subgroup 25	uncultured Acidobacteria bacterium	uncultured Acidobacteria bacterium	uncultured Acidobacteria bacterium	uncultured Acidobacteria bacterium	0.00307769	RF737	B1760_uncultured Acidobacteria bacterium	Not differential
HQ597366.1.1474	5.50126	Acidobacteria	Subgroup 11	#N/A	#N/A	#N/A	#N/A	0.00307703	RF738	B980_o_NA	Non-fer
14467bd7cead1e0c24f477559da48bba	2.07944	Proteobacteria	Gammaproteobacteria	#N/A	#N/A	#N/A	#N/A	0.00307692	RF739	B16235_o_NA	Not differential
e6cabb20959a4c0bc2e6ead219b86ad9	4.91998	Chloroflexi	Anaerolineae	SBR1031	uncultured bacterium	uncultured bacterium	uncultured bacterium	0.0030722	RF740	B2457_uncultured bacterium	Fer
KF071108.1.1356	6.0845	Proteobacteria	Gammaproteobacteria	Betaproteobacteriales	Burkholderiaceae	Aquabacterium	#N/A	0.00307083	RF741	B1447_Aquabacterium	Not differential
8ffd471f8c5c589344ef0ab8d83dc171	5.9162	Chloroflexi	Anaerolineae	Anaerolineales	Anaerolineaceae	Anaerolinea	#N/A	0.00305882	RF742	B857_Anaerolinea	Non-fer
99ef2e0777b07b1e6a486a7181d6ff4f	3.4012	Proteobacteria	Deltaproteobacteria	Myxococcales	bacteriap25	uncultured soil bacterium	uncultured soil bacterium	0.00305882	RF743	B13374_uncultured soil bacterium	Not differential
EU644265.1.1458	5.49717	Bacteroidetes	Ignavibacteria	Kryptoniales	BSV26	uncultured prokaryote	uncultured prokaryote	0.00305357	RF744	B901_uncultured prokaryote	Not differential
1a497b3bdac6f9caff355a9c3a07cb92	4.89035	Proteobacteria	Deltaproteobacteria	Sva0485	uncultured Spirochaetales bacterium	uncultured Spirochaetales bacterium	uncultured Spirochaetales bacterium	0.00305333	RF745	B2783_uncultured Spirochaetales bacterium	Not differential
GQ402552.1.1491	7.66528	Verrucomicrobia	Verrucomicrobiae	Pedosphaerales	Pedosphaeraceae	ADurb.Bin063-1	#N/A	0.00303632	RF746	B80_ADurb.Bin063-1	Not differential
JX505105.1.1478	6.78219	Acidobacteria	Holophagae	Subgroup 7	uncultured Desulfovirga sp.	uncultured Desulfovirga sp.	uncultured Desulfovirga sp.	0.00303175	RF747	B151_uncultured Desulfovirga sp.	Non-fer
b39874043a9d7ba374c1baaa5242a86a	6.2106	Chloroflexi	Anaerolineae	SJA-15	#N/A	#N/A	#N/A	0.00302887	RF748	B2870_o_SJA-15	Non-fer
JF120067.1.1353	6.25383	Proteobacteria	Gammaproteobacteria	Betaproteobacteriales	SC-I-84	#N/A	#N/A	0.0030188	RF749	B290_f_SC-I-84	Non-fer
1e86916dd0ef164ced178f1eaedf537d	2.99573	Patescibacteria	ABY1	Candidatus Magasanikbacteria	uncultured bacterium	uncultured bacterium	uncultured bacterium	0.00301111	RF750	B5815_uncultured bacterium	Not differential
EF019260.1.1382	6.47697	Proteobacteria	Gammaproteobacteria	Betaproteobacteriales	SC-I-84	uncultured Nitrosomonadaceae bacterium	uncultured Nitrosomonadaceae bacterium	0.00300731	RF751	B1976_uncultured Nitrosomonadaceae bacterium	Fer
GU208422.1.1442	6.40688	Proteobacteria	Gammaproteobacteria	Betaproteobacteriales	Nitrosomonadaceae	DSSD61	uncultured bacterium	0.00300595	RF752	B2231_DSSD61	Not differential
KY190385.1.1419	6.3315	Proteobacteria	Alphaproteobacteria	Acetobacterales	Acetobacteraceae	#N/A	#N/A	0.00300345	RF753	B658_f_Acetobacteraceae	Fer
98e73ce359b8a6a4f49b1a9399ad7fa8	4.00733	Chloroflexi	Anaerolineae	Ardenticatenales	uncultured	uncultured bacterium	uncultured bacterium	0.003	RF754	B6129_uncultured bacterium	Fer
248524af71715b43570e0385f484ab2d	4.00733	Proteobacteria	Alphaproteobacteria	Paracaedibacterales	Paracaedibacteraceae	Candidatus Paracaedibacter	#N/A	0.003	RF755	B7633_Candidatus Paracaedibacter	Not differential
094c43f100f433ade36915f0c912375b	4.89784	Latescibacteria	uncultured bacterium	uncultured bacterium	uncultured bacterium	uncultured bacterium	uncultured bacterium	0.003	RF756	B3004_uncultured bacterium	Non-fer
FPLS01034797.35.1540	6.03787	Actinobacteria	Thermoleophilia	Solirubrobacterales	Solirubrobacteraceae	Conexibacter	#N/A	0.00299389	RF757	B719_Conexibacter	Non-fer
FJ152674.1.1492	6.14204	Proteobacteria	Deltaproteobacteria	Myxococcales	Archangiaceae	#N/A	#N/A	0.00299107	RF758	B2097_f_Archangiaceae	Not differential
HE587097.1.1398	6.61874	Proteobacteria	Gammaproteobacteria	Betaproteobacteriales	Gallionellaceae	Sideroxydans	#N/A	0.00298728	RF759	B582_Sideroxydans	Fer
dc063b4d6c48bc8dcbe697523913976b	5.6058	Latescibacteria	uncultured proteobacterium	uncultured proteobacterium	uncultured proteobacterium	uncultured proteobacterium	uncultured proteobacterium	0.00298086	RF760	B1557_uncultured proteobacterium	Fer
KM373092.1.1487	5.34233	Proteobacteria	Deltaproteobacteria	Syntrophobacterales	Syntrophaceae	Desulfobacca	#N/A	0.00297773	RF761	B3120_Desulfobacca	Not differential
JN038981.1.1520	7.28001	Proteobacteria	Deltaproteobacteria	Syntrophobacterales	Syntrophobacteraceae	Syntrophobacter	uncultured delta proteobacterium	0.002975	RF762	B1137_Syntrophobacter	Not differential
0425f529e544b38c99e483652f22dfa4	2.99573	Acidobacteria	AT-s3-28	uncultured bacterium	uncultured bacterium	uncultured bacterium	uncultured bacterium	0.00296581	RF763	B7541_uncultured bacterium	Not differential
EF464627.1.1380	5.50126	Actinobacteria	Acidimicrobiia	Microtrichales	uncultured	uncultured actinobacterium	uncultured actinobacterium	0.00296061	RF764	B1937_uncultured actinobacterium	Fer
GQ396836.1.1487	7.18159	Acidobacteria	Blastocatellia (Subgroup 4)	Blastocatellales	Blastocatellaceae	#N/A	#N/A	0.00295417	RF765	B950_f_Blastocatellaceae	Not differential
82f54e09818af027a28b49a154447b4a	5.43808	Omnitrophicaeota	uncultured bacterium	uncultured bacterium	uncultured bacterium	uncultured bacterium	uncultured bacterium	0.00294912	RF766	B4002_uncultured bacterium	Fer
2be450ba3fde24601bafebebf8cb9bb5	4.02535	Armatimonadetes	uncultured	#N/A	#N/A	#N/A	#N/A	0.00294862	RF767	B2888_o_NA	Fer
1da2f553ccc39a5a903d72c5a668efc8	2.19722	Planctomycetes	Planctomycetacia	Gemmatales	Gemmataceae	Gemmata	uncultured planctomycete	0.00293927	RF768	B16796_Gemmata	Not differential
39f2c267925555b7910dc11ebc485e7f	2.89037	Patescibacteria	ABY1	#N/A	#N/A	#N/A	#N/A	0.00293832	RF769	B4287_o_NA	Not differential
DQ138963.1.1519	5.54908	Nitrospirae	4-29-1	uncultured bacterium	uncultured bacterium	uncultured bacterium	uncultured bacterium	0.0029375	RF770	B461_uncultured bacterium	Not differential
AB486113.1.1371	7.23273	Proteobacteria	Deltaproteobacteria	Myxococcales	Archangiaceae	Anaeromyxobacter	#N/A	0.00293312	RF771	B260_Anaeromyxobacter	Fer
d95d85cf383bec1a154d0ecf6f353519	2.56495	Proteobacteria	#N/A	#N/A	#N/A	#N/A	#N/A	0.00292308	RF772	B8236_o_NA	Not differential
AM086115.1.1463	5.74939	Acidobacteria	Acidobacteriia	Subgroup 13	uncultured Acidobacteria bacterium	uncultured Acidobacteria bacterium	uncultured Acidobacteria bacterium	0.00292308	RF773	B2405_uncultured Acidobacteria bacterium	Not differential
7b3e6a278570e3c2f0742f1f02488e13	3.98898	Verrucomicrobia	Verrucomicrobiae	Pedosphaerales	Pedosphaeraceae	#N/A	#N/A	0.00291667	RF774	B7412_f_Pedosphaeraceae	Not differential
AB240331.1.1493	4.26268	Bacteroidetes	Bacteroidia	Bacteroidales	Prolixibacteraceae	BSV13	#N/A	0.00291387	RF775	B2523_BSV13	Not differential
4ba2c70f83193b9f49b33860a0bc7ced	1.79176	#N/A	#N/A	#N/A	#N/A	#N/A	#N/A	0.00290494	RF776	B15777_o_NA	Not differential
AB240375.1.1484	6.03069	Bacteroidetes	Bacteroidia	Bacteroidales	Bacteroidetes vadinHA17	uncultured Alkaliflexus sp.	uncultured Alkaliflexus sp.	0.00289951	RF777	B2659_uncultured Alkaliflexus sp.	Non-fer
510a6b6e09ca3e089ccecc7039a1652e	6.1591	Chloroflexi	Anaerolineae	Anaerolineales	Anaerolineaceae	Leptolinea	#N/A	0.00289951	RF778	B1398_Leptolinea	Not differential
HQ132471.1.1573	4.91265	Proteobacteria	Deltaproteobacteria	Desulfarculales	Desulfarculaceae	uncultured	uncultured Desulfuromonadales bacterium	0.00289367	RF779	B4906_uncultured	Fer
AJ401108.1.1372	4.44265	Verrucomicrobia	Verrucomicrobiae	Verrucomicrobiales	Verrucomicrobiaceae	uncultured	uncultured verrucomicrobium DEV009	0.00287662	RF780	B7099_uncultured	Not differential
8be4ac9926bb6474c3eff34bdec88831	2.99573	Proteobacteria	Deltaproteobacteria	Myxococcales	Haliangiaceae	Haliangium	#N/A	0.00286813	RF781	B8328_Haliangium	Fer
5cfa125f3a9db31af154a980768743ab	3.04452	Spirochaetes	Spirochaetia	Spirochaetales	Spirochaetaceae	Spirochaeta 2	uncultured bacterium	0.00286275	RF782	B3846_Spirochaeta 2	Fer
JX222840.1.1516	6.67077	Proteobacteria	Deltaproteobacteria	Desulfuromonadales	Geobacteraceae	Geobacter	#N/A	0.00285725	RF783	B1609_Geobacter	Non-fer
c9a5b97d0ee40e51906b19cffae2b27b	3.17805	Chloroflexi	Anaerolineae	ADurb.Bin180	#N/A	#N/A	#N/A	0.00285714	RF784	B9096_o_ADurb.Bin180	Non-fer
f63847aa566aee6eab8d75a8361cf52f	4.89784	Chloroflexi	SHA-26	#N/A	#N/A	#N/A	#N/A	0.00285714	RF785	B1762_o_NA	Not differential
JO171658.113.1331	8.87361	Proteobacteria	Gammaproteobacteria	Betaproteobacteriales	Burkholderiaceae	#N/A	#N/A	0.00285256	RF786	B129_f_Burkholderiaceae	Non-fer
EU132200.1.1364	7.08423	Acidobacteria	Holophagae	Subgroup 7	uncultured Desulfuromonadales bacterium	uncultured Desulfuromonadales bacterium	uncultured Desulfuromonadales bacterium	0.00285	RF787	B209_uncultured Desulfuromonadales bacterium	Non-fer
DQ067020.1.1370	5.38907	Gemmatimonadetes	Gemmatimonadetes	Gemmatimonadales	Gemmatimonadaceae	uncultured	#N/A	0.00284722	RF788	B1706_uncultured	Not differential
FPLS01001113.1.1211	5.6058	Actinobacteria	Thermoleophilia	Solirubrobacterales	67-14	metagenome	metagenome	0.00284226	RF789	B2381_metagenome	Not differential
FPLS01006203.16.1519	4.58497	Bacteroidetes	Bacteroidia	Cytophagales	Microscillaceae	Chryseolinea	uncultured Cytophagaceae bacterium	0.0028125	RF790	B5748_Chryseolinea	Non-fer
AM936280.1.1283	1.60944	Proteobacteria	Alphaproteobacteria	Caulobacterales	Parvularculaceae	Amphiplicatus	uncultured Rhizobiales bacterium	0.00281201	RF791	B19421_Amphiplicatus	Not differential
LC008328.1.1491	6.24804	Proteobacteria	Deltaproteobacteria	Desulfuromonadales	Geobacteraceae	Geobacter	Geobacter sp. AOG2	0.00280702	RF792	B1931_Geobacter	Not differential
817e18a89c3ed9f9e37a381beaf78555	4.00733	Proteobacteria	Deltaproteobacteria	Myxococcales	#N/A	#N/A	#N/A	0.00280337	RF793	B3937_o_Myxococcales	Fer
KX504809.1.1514	5.67332	Acidobacteria	Subgroup 22	uncultured prokaryote	uncultured prokaryote	uncultured prokaryote	uncultured prokaryote	0.00279832	RF794	B589_uncultured prokaryote	Not differential
KJ957694.1.1463	5.3799	Spirochaetes	Spirochaetia	Spirochaetales	Spirochaetaceae	uncultured	uncultured soil bacterium	0.00279006	RF795	B2708_uncultured	Fer
GQ261282.1.1474	5.1299	Proteobacteria	Gammaproteobacteria	Ectothiorhodospirales	Thioalkalispiraceae	Thioalkalispira	uncultured soil bacterium	0.00277976	RF796	B369_Thioalkalispira	Fer
c06e735bb04a62e74932834fd23fe772	3.82864	Chloroflexi	JG30-KF-CM66	metagenome	metagenome	metagenome	metagenome	0.00275909	RF797	B3317_metagenome	Non-fer
JX504897.1.1429	8.13798	Chloroflexi	Anaerolineae	Anaerolineales	Anaerolineaceae	uncultured	uncultured Bellilinea sp.	0.00275245	RF798	B160_uncultured	Fer
63f9fb593243704425ebdd450e1bf4ba	4.33073	Chloroflexi	Anaerolineae	SBR1031	#N/A	#N/A	#N/A	0.00275	RF799	B6439_o_SBR1031	Not differential
a583020e5fa819e6b8d2f7df48ddf218	3.68888	Spirochaetes	Spirochaetia	Spirochaetales	Spirochaetaceae	Spirochaeta 2	uncultured bacterium	0.0027399	RF800	B2584_Spirochaeta 2	Fer
1bf2d5d79c45657703aab4b422f741a8	4.35671	Armatimonadetes	uncultured	#N/A	#N/A	#N/A	#N/A	0.00273131	RF801	B6811_o_NA	Non-fer
1f87b35141fcca11d6767cf99741a6d9	3.85015	Chloroflexi	AD3	uncultured Chloroflexi bacterium	uncultured Chloroflexi bacterium	uncultured Chloroflexi bacterium	uncultured Chloroflexi bacterium	0.00272684	RF802	B4417_uncultured Chloroflexi bacterium	Not differential
JN038879.1.1511	6.17794	Acidobacteria	Acidobacteriia	Subgroup 13	uncultured Acidobacteria bacterium	uncultured Acidobacteria bacterium	uncultured Acidobacteria bacterium	0.00272222	RF803	B774_uncultured Acidobacteria bacterium	Fer
AB672314.1.1440	6.95655	Actinobacteria	MB-A2-108	#N/A	#N/A	#N/A	#N/A	0.00272213	RF804	B244_o_NA	Non-fer
AB672227.1.1427	4.65396	Chloroflexi	Anaerolineae	RBG-13-54-9	uncultured Caldilineaceae bacterium	uncultured Caldilineaceae bacterium	uncultured Caldilineaceae bacterium	0.00272003	RF805	B531_uncultured Caldilineaceae bacterium	Not differential
HQ119622.1.1485	6.44413	Armatimonadetes	Chthonomonadetes	Chthonomonadales	Chthonomonadaceae	Chthonomonas	uncultured bacterium	0.00271905	RF806	B541_Chthonomonas	Fer
JF139635.1.1337	7.44015	Actinobacteria	Actinobacteria	Kineosporiales	Kineosporiaceae	Kineosporia	#N/A	0.00271032	RF807	B426_Kineosporia	Not differential
7e3f9191f1ed3cf1dbd28210890061f4	4.5326	Chloroflexi	Anaerolineae	RBG-13-54-9	uncultured bacterium UASB_TL14	uncultured bacterium UASB_TL14	uncultured bacterium UASB_TL14	0.00270948	RF808	B2822_uncultured bacterium UASB_TL14	Non-fer
6cfec728eb699f07319a5db7dbc7c175	6.69332	TA06	uncultured soil bacterium	uncultured soil bacterium	uncultured soil bacterium	uncultured soil bacterium	uncultured soil bacterium	0.0026886	RF809	B730_uncultured soil bacterium	Fer
2ffc62f1aaf3655b21635be8a727b0a8	5.99894	Chloroflexi	Anaerolineae	Anaerolineales	Anaerolineaceae	Anaerolinea	#N/A	0.00268269	RF810	B3167_Anaerolinea	Not differential
JN038797.1.1517	3.2581	Acidobacteria	Subgroup 22	uncultured Acidobacteriales bacterium	uncultured Acidobacteriales bacterium	uncultured Acidobacteriales bacterium	uncultured Acidobacteriales bacterium	0.00268254	RF811	B1965_uncultured Acidobacteriales bacterium	Fer
AJ229230.1.1424	5.78074	Firmicutes	Clostridia	Clostridiales	Clostridiaceae 1	Clostridium sensu stricto 10	unidentified eubacterium clone BSV86	0.00268254	RF812	B1570_Clostridium sensu stricto 10	Non-fer
818b553c207785a8c52c4cd619fe912f	6.31173	Proteobacteria	Deltaproteobacteria	Myxococcales	Archangiaceae	Anaeromyxobacter	#N/A	0.00268254	RF813	B1403_Anaeromyxobacter	Non-fer
AB722129.1.1395	4.09434	WS1	uncultured bacterium SJA-43	uncultured bacterium SJA-43	uncultured bacterium SJA-43	uncultured bacterium SJA-43	uncultured bacterium SJA-43	0.00267778	RF814	B5201_uncultured bacterium SJA-43	Not differential
FPLS01059508.10.1516	4.7185	Bacteroidetes	Bacteroidia	Chitinophagales	Chitinophagaceae	uncultured	Spumella-like flagellate JBM08	0.00267083	RF815	B5419_uncultured	Not differential
2e864d17d8514a8545fa12f37ba15774	1.79176	Proteobacteria	Deltaproteobacteria	Desulfobacterales	Desulfobulbaceae	#N/A	#N/A	0.00266827	RF816	B14417_f_Desulfobulbaceae	Not differential
ae6dc1b7d363912cc453b88b849fbf3d	3.49651	Proteobacteria	Deltaproteobacteria	Syntrophobacterales	Syntrophobacteraceae	uncultured	#N/A	0.00266534	RF817	B12928_uncultured	Not differential
575ad5355aa033c4b0521c07daab2773	5.36598	Actinobacteria	Acidimicrobiia	#N/A	#N/A	#N/A	#N/A	0.00265893	RF818	B2331_o_NA	Fer
7de8fc11bda9c095353d6bcc9db70ffb	5.14749	Zixibacteria	bioreactor metagenome	bioreactor metagenome	bioreactor metagenome	bioreactor metagenome	bioreactor metagenome	0.0026583	RF819	B2350_bioreactor metagenome	Non-fer
DQ501327.1.1474	3.91202	Proteobacteria	Deltaproteobacteria	Bdellovibrionales	Bdellovibrionaceae	OM27 clade	#N/A	0.00265296	RF820	B5504_OM27 clade	Fer
a6891605757284abbb6e0e590f496ea4	5.60947	Latescibacteria	#N/A	#N/A	#N/A	#N/A	#N/A	0.00265	RF821	B4213_o_NA	Non-fer
JF703387.1.1439	4.81218	Proteobacteria	Gammaproteobacteria	Gammaproteobacteria Incertae Sedis	Unknown Family	Candidatus Ovatusbacter	uncultured proteobacterium	0.00264902	RF822	B3727_Candidatus Ovatusbacter	Fer
28a6f51967e82ec5a0a373cd3e26e892	2.63906	#N/A	#N/A	#N/A	#N/A	#N/A	#N/A	0.00264608	RF823	B4464_o_NA	Not differential
HM270023.1.1366	6.5582	Actinobacteria	Thermoleophilia	Gaiellales	uncultured	#N/A	#N/A	0.00264469	RF824	B141_f_uncultured	Non-fer
022f1031557a390d6919559d995b9470	1.60944	Proteobacteria	Deltaproteobacteria	Myxococcales	#N/A	#N/A	#N/A	0.00263834	RF825	B14403_o_Myxococcales	Not differential
FJ535311.1.1360	5.09987	Proteobacteria	Gammaproteobacteria	Diplorickettsiales	Diplorickettsiaceae	Aquicella	#N/A	0.00263736	RF826	B5767_Aquicella	Non-fer
1b35f7f0b8431ab5009d091f39d98de8	5.2832	Acidobacteria	Subgroup 22	#N/A	#N/A	#N/A	#N/A	0.0026369	RF827	B1313_o_NA	Fer
JX120374.1.1530	4.15888	Kiritimatiellaeota	Kiritimatiellae	WCHB1-41	uncultured soil bacterium	uncultured soil bacterium	uncultured soil bacterium	0.00263636	RF828	B3034_uncultured soil bacterium	Not differential
9b9f50d65352b21c26ac94e6d1028f1c	5.69036	Bacteroidetes	Ignavibacteria	SJA-28	uncultured bacterium	uncultured bacterium	uncultured bacterium	0.00263258	RF829	B1879_uncultured bacterium	Not differential
54a1786860e382db2a4ca182bd2d0fba	0.693147	Proteobacteria	#N/A	#N/A	#N/A	#N/A	#N/A	0.00262933	RF830	B15060_o_NA	Not differential
DQ404776.1.1461	5.42053	Chloroflexi	Anaerolineae	RBG-13-54-9	uncultured prokaryote	uncultured prokaryote	uncultured prokaryote	0.002625	RF831	B1082_uncultured prokaryote	Non-fer
JF703569.1.1408	3.13549	Bacteroidetes	Bacteroidia	Cytophagales	Microscillaceae	uncultured	uncultured Sphingobacteriales bacterium	0.00262088	RF832	B9741_uncultured	Not differential
EU276508.1.1484	6.39859	Acidobacteria	Subgroup 17	uncultured prokaryote	uncultured prokaryote	uncultured prokaryote	uncultured prokaryote	0.00261538	RF833	B639_uncultured prokaryote	Fer
533ae75e36fb3b8c939f66ce7ba6f08f	3.55535	Armatimonadetes	uncultured bacterium	uncultured bacterium	uncultured bacterium	uncultured bacterium	uncultured bacterium	0.00261058	RF834	B5082_uncultured bacterium	Not differential
428dff392cecae83001892c2646408aa	5.83481	Planctomycetes	Phycisphaerae	Tepidisphaerales	WD2101 soil group	#N/A	#N/A	0.00261041	RF835	B2320_f_WD2101 soil group	Not differential
ee7d9feb74581279a6e8e1ba737cbeb1	2.70805	Chloroflexi	Anaerolineae	SBR1031	uncultured sludge bacterium H5	uncultured sludge bacterium H5	uncultured sludge bacterium H5	0.00260894	RF836	B5638_uncultured sludge bacterium H5	Not differential
2d122c7fdf76ae1190efa8d90615b632	0.693147	Proteobacteria	Alphaproteobacteria	#N/A	#N/A	#N/A	#N/A	0.00260633	RF837	B21974_o_NA	Not differential
314775b748bfb541f93f8691687a7d82	5.3845	Planctomycetes	Pla3 lineage	uncultured bacterium	uncultured bacterium	uncultured bacterium	uncultured bacterium	0.00260633	RF838	B1695_uncultured bacterium	Not differential
AM086112.1.1468	7.21744	Proteobacteria	Deltaproteobacteria	Syntrophobacterales	Syntrophobacteraceae	uncultured	uncultured proteobacterium	0.00260417	RF839	B275_uncultured	Not differential
5c08284c7dcf64f1d1a9fe75d0f585bd	5.17048	Chloroflexi	Anaerolineae	RBG-13-54-9	uncultured Caldilineaceae bacterium	uncultured Caldilineaceae bacterium	uncultured Caldilineaceae bacterium	0.00260417	RF840	B1443_uncultured Caldilineaceae bacterium	Fer
c2b114fecb3e2fa7977b4fbdee208405	4.17439	Verrucomicrobia	Verrucomicrobiae	Pedosphaerales	Pedosphaeraceae	#N/A	#N/A	0.00260307	RF841	B6888_f_Pedosphaeraceae	Not differential
GQ472376.1.1519	4.66344	Planctomycetes	Phycisphaerae	MSBL9	SG8-4	#N/A	#N/A	0.00260165	RF842	B3164_f_SG8-4	Fer
87c24ee8f57fb8824543de52178d1b66	3.73767	Planctomycetes	Planctomycetacia	Isosphaerales	Isosphaeraceae	Candidatus Nostocoida	#N/A	0.0026	RF843	B5597_Candidatus Nostocoida	Not differential
HQ330600.1.1417	7.36455	Proteobacteria	Deltaproteobacteria	Syntrophobacterales	Syntrophaceae	Syntrophus	uncultured delta proteobacterium	0.00259722	RF844	B440_Syntrophus	Fer
GQ487974.1.1501	5.65948	Proteobacteria	Gammaproteobacteria	Betaproteobacteriales	Methylophilaceae	uncultured bacterium	uncultured bacterium	0.00259524	RF845	B1340_uncultured bacterium	Non-fer
3bb41eac8d7ae6344e5da1e24f92768f	1.79176	Latescibacteria	Latescibacteria	Latescibacterales	Latescibacteraceae	Candidatus Latescibacter	#N/A	0.00259424	RF846	B7716_Candidatus Latescibacter	Not differential
HQ178750.1.1443	5.39816	Bacteroidetes	Bacteroidia	Sphingobacteriales	Lentimicrobiaceae	uncultured soil bacterium	uncultured soil bacterium	0.00259121	RF847	B2376_uncultured soil bacterium	Fer
DQ205193.1.1473	5.72031	Proteobacteria	Deltaproteobacteria	Desulfovibrionales	Desulfovibrionaceae	Desulfovibrio	Desulfovibrio sp. enrichment culture clone AP-FeEnrich15	0.00257639	RF848	B1204_Desulfovibrio	Not differential
a8696b14e6b5f1661a7b4d37f2bb2d78	0.693147	Chloroflexi	Anaerolineae	Anaerolineales	Anaerolineaceae	uncultured	#N/A	0.00257576	RF849	B22304_uncultured	Not differential
EU133552.1.1310	5.70378	Proteobacteria	Alphaproteobacteria	Sphingomonadales	Sphingomonadaceae	Sphingomonas	#N/A	0.0025697	RF850	B720_Sphingomonas	Non-fer
207435575ff4fcbedd88c3209a4cb256	1.79176	#N/A	#N/A	#N/A	#N/A	#N/A	#N/A	0.00255739	RF851	B16798_o_NA	Not differential
0657b190029301952e101c1adea5f9f5	3.82864	Planctomycetes	Phycisphaerae	MSBL9	SG8-4	#N/A	#N/A	0.00255556	RF852	B1088_f_SG8-4	Not differential
DQ018792.1.1291	5.50939	Proteobacteria	Alphaproteobacteria	Sphingomonadales	Sphingomonadaceae	Novosphingobium	#N/A	0.00255163	RF853	B1153_Novosphingobium	Fer
c58876815f50650edce30d7678f1f7e0	2.63906	Spirochaetes	Leptospirae	Leptospirales	Leptospiraceae	uncultured	uncultured bacterium	0.00253095	RF854	B2754_uncultured	Not differential
EU488419.1.1514	4.15888	Planctomycetes	Phycisphaerae	MSBL9	SG8-4	#N/A	#N/A	0.00252632	RF855	B9728_f_SG8-4	Not differential
EF018884.1.1381	5.05625	Actinobacteria	Acidimicrobiia	Microtrichales	Ilumatobacteraceae	CL500-29 marine group	metagenome	0.00252381	RF856	B751_CL500-29 marine group	Non-fer
6771ec49ebba200f14730662c2f0dcc6	3.80666	Latescibacteria	uncultured bacterium	uncultured bacterium	uncultured bacterium	uncultured bacterium	uncultured bacterium	0.00252012	RF857	B4124_uncultured bacterium	Not differential
e252041d60f1c9b5370e162d08fbbcf9	5.09987	Chloroflexi	Anaerolineae	SBR1031	#N/A	#N/A	#N/A	0.00251171	RF858	B2837_o_SBR1031	Fer
216f8aad4a34cc821c39f7db1521dca4	1.09861	Actinobacteria	Acidimicrobiia	IMCC26256	uncultured Acidothermaceae bacterium	uncultured Acidothermaceae bacterium	uncultured Acidothermaceae bacterium	0.00250822	RF859	B21281_uncultured Acidothermaceae bacterium	Not differential
HQ118841.1.1290	7.11883	Proteobacteria	Gammaproteobacteria	Betaproteobacteriales	Burkholderiaceae	Massilia	#N/A	0.00250694	RF860	B352_Massilia	Non-fer
EU644233.1.1455	6.34739	Bacteroidetes	Bacteroidia	Sphingobacteriales	Lentimicrobiaceae	#N/A	#N/A	0.00250181	RF861	B436_f_Lentimicrobiaceae	Not differential
72d33d8c77db239a53f1f7cb1b15e02e	4.72739	Planctomycetes	Phycisphaerae	Tepidisphaerales	WD2101 soil group	#N/A	#N/A	0.00250181	RF862	B1453_f_WD2101 soil group	Not differential
2c7dbdf989dd6ad8c0264699ce0616cb	4.52179	Elusimicrobia	Lineage IIa	uncultured bacterium	uncultured bacterium	uncultured bacterium	uncultured bacterium	0.0025	RF863	B2474_uncultured bacterium	Not differential
CXWL01000614.1530.2956	2.70805	Patescibacteria	Gracilibacteria	groundwater metagenome	groundwater metagenome	groundwater metagenome	groundwater metagenome	0.00249722	RF864	B4583_groundwater metagenome	Not differential
05a2c33167f8610b17f2c83ef46966b1	3.29584	Omnitrophicaeota	Omnitrophia	Omnitrophales	Omnitrophaceae	Candidatus Omnitrophus	uncultured Omnitrophica bacterium	0.00249722	RF865	B13855_Candidatus Omnitrophus	Fer
JF211647.1.1344	6.84907	Actinobacteria	Acidimicrobiia	Microtrichales	uncultured	metagenome	metagenome	0.00249707	RF866	B976_metagenome	Fer
KF956463.1.1412	6.65801	Chloroflexi	OLB14	uncultured Chloroflexi bacterium	uncultured Chloroflexi bacterium	uncultured Chloroflexi bacterium	uncultured Chloroflexi bacterium	0.00249519	RF867	B645_uncultured Chloroflexi bacterium	Not differential
EU132409.1.1320	3.58352	Acidobacteria	Acidobacteriia	Subgroup 12	uncultured bacterium	uncultured bacterium	uncultured bacterium	0.00249048	RF868	B4619_uncultured bacterium	Not differential
JQ990328.1.1485	3.13549	Chloroflexi	Dehalococcoidia	Dehalococcoidales	Dehalococcoidaceae	Dehalogenimonas	uncultured bacterium	0.00248636	RF869	B10244_Dehalogenimonas	Fer
e89c204ce953d0cd937292b761488d0c	3.82864	Firmicutes	Clostridia	Clostridiales	Ruminococcaceae	#N/A	#N/A	0.00248462	RF870	B8640_f_Ruminococcaceae	Non-fer
LN774187.1.1401	6.86589	Actinobacteria	Actinobacteria	Micrococcales	Intrasporangiaceae	#N/A	#N/A	0.00247781	RF871	B642_f_Intrasporangiaceae	Fer
HM269005.1.1374	4.77912	Proteobacteria	Gammaproteobacteria	JG36-TzT-191	uncultured proteobacterium	uncultured proteobacterium	uncultured proteobacterium	0.00247535	RF872	B1810_uncultured proteobacterium	Non-fer
HM270313.1.1364	5.55683	Actinobacteria	Thermoleophilia	Gaiellales	uncultured	bacterium Ellin6515	bacterium Ellin6515	0.00247475	RF873	B2807_bacterium Ellin6515	Not differential
JN397774.1.1445	3.89182	Bacteroidetes	Bacteroidia	Chitinophagales	uncultured	uncultured delta proteobacterium	uncultured delta proteobacterium	0.00247059	RF874	B4893_uncultured delta proteobacterium	Not differential
JF177292.1.1308	6.87936	Proteobacteria	Alphaproteobacteria	Sphingomonadales	Sphingomonadaceae	#N/A	#N/A	0.00247059	RF875	B1759_f_Sphingomonadaceae	Not differential
87d34f5dac87cb4761e316ec25f5c69b	2.70805	Proteobacteria	Deltaproteobacteria	Myxococcales	KD3-10	#N/A	#N/A	0.00247059	RF876	B16621_f_KD3-10	Not differential
1e4c46478c1a827221bc9c5831414fff	4.69135	Proteobacteria	Gammaproteobacteria	#N/A	#N/A	#N/A	#N/A	0.00247059	RF877	B6000_o_NA	Not differential
eb2dfac131836ad88b164b1eecce14dd	3.95124	Chloroflexi	Chloroflexia	Chloroflexales	Herpetosiphonaceae	Herpetosiphon	#N/A	0.00247059	RF878	B9632_Herpetosiphon	Not differential
522ad2d7b300951d5d80c303b58c8528	4.34381	Bacteroidetes	Ignavibacteria	Ignavibacteriales	BSV40	unidentified eubacterium clone BSV40	unidentified eubacterium clone BSV40	0.00247003	RF879	B2559_unidentified eubacterium clone BSV40	Fer
25d27e7a7f2cdd0e68de693c49221122	4.2485	Chloroflexi	Anaerolineae	Ardenticatenales	uncultured	uncultured prokaryote	uncultured prokaryote	0.00246711	RF880	B4418_uncultured prokaryote	Not differential
077959edfdde2ea13c8cc7aa5837cdcb	3.80666	Proteobacteria	Deltaproteobacteria	Myxococcales	MidBa8	uncultured Myxococcales bacterium	uncultured Myxococcales bacterium	0.00246711	RF881	B4786_uncultured Myxococcales bacterium	Not differential
6f58f487832874ce6112ce8cf42fed06	4.09434	Verrucomicrobia	Verrucomicrobiae	S-BQ2-57 soil group	uncultured bacterium	uncultured bacterium	uncultured bacterium	0.00246628	RF882	B3804_uncultured bacterium	Fer
d3e971a8338952d3ec59b73823d5b71b	4.52179	#N/A	#N/A	#N/A	#N/A	#N/A	#N/A	0.00246583	RF883	B972_o_NA	Not differential
FPLL01006255.18.1277	7.73061	Proteobacteria	Alphaproteobacteria	Reyranellales	Reyranellaceae	Reyranella	#N/A	0.00245833	RF884	B397_Reyranella	Not differential
FPLS01011457.8.1337	3.3322	Verrucomicrobia	Verrucomicrobiae	Verrucomicrobiales	Verrucomicrobiaceae	Roseimicrobium	metagenome	0.00245553	RF885	B7789_Roseimicrobium	Fer
EF590008.1.1339	3.97029	Chloroflexi	TK10	#N/A	#N/A	#N/A	#N/A	0.00245238	RF886	B3020_o_NA	Fer
f0622dc58e55fc3cb460188a912069e2	6.54103	Acidobacteria	Holophagae	Subgroup 7	uncultured Thermaerobacter sp.	uncultured Thermaerobacter sp.	uncultured Thermaerobacter sp.	0.00245	RF887	B782_uncultured Thermaerobacter sp.	Non-fer
JX079206.1.1279	5.76832	Chloroflexi	Anaerolineae	SJA-15	uncultured bacterium	uncultured bacterium	uncultured bacterium	0.00244635	RF888	B1138_uncultured bacterium	Non-fer
JN210905.1.1407	3.04452	Bacteroidetes	Bacteroidia	Cytophagales	Spirosomaceae	Dyadobacter	Dyadobacter fermentans	0.0024375	RF889	B15213_Dyadobacter	Not differential
JF176663.1.1380	5.01728	Verrucomicrobia	Verrucomicrobiae	Chthoniobacterales	Chthoniobacteraceae	Chthoniobacter	uncultured bacterium	0.0024375	RF890	B2565_Chthoniobacter	Fer
e12d0d84c4d8191e5998bbda303e6332	3.58352	WS2	uncultured bacterium	uncultured bacterium	uncultured bacterium	uncultured bacterium	uncultured bacterium	0.0024375	RF891	B10995_uncultured bacterium	Fer
9f6cf4bea91edd5dfd087b15c626bbe1	2.30259	Spirochaetes	V2072-189E03	uncultured Spirochaetales bacterium	uncultured Spirochaetales bacterium	uncultured Spirochaetales bacterium	uncultured Spirochaetales bacterium	0.0024375	RF892	B14480_uncultured Spirochaetales bacterium	Fer
89eeea466bc31e16738d601c3bcaff38	0.693147	Proteobacteria	Gammaproteobacteria	#N/A	#N/A	#N/A	#N/A	0.0024256	RF893	B22216_o_NA	Not differential
AB486378.1.1395	5.40268	Acidobacteria	Holophagae	Subgroup 7	#N/A	#N/A	#N/A	0.00241667	RF894	B581_o_Subgroup 7	Non-fer
ab5e8d680f317860a58d8c0ca00da680	2.48491	Acidobacteria	Blastocatellia (Subgroup 4)	11-24	#N/A	#N/A	#N/A	0.00241515	RF895	B17562_o_11-24	Not differential
d8cff3c9f3c3a5d9ef97da2ba763a476	3.04452	Planctomycetes	Planctomycetacia	Pirellulales	Pirellulaceae	#N/A	#N/A	0.0024127	RF896	B13581_f_Pirellulaceae	Not differential
JQ337539.1.1421	0.693147	Deinococcus-Thermus	Deinococci	Deinococcales	Trueperaceae	Truepera	uncultured bacterium	0.00241126	RF897	B22604_Truepera	Not differential
a7654fce5b537af1e5b208d65bc8b7fa	3.82864	Planctomycetes	Phycisphaerae	Pla1 lineage	uncultured bacterium	uncultured bacterium	uncultured bacterium	0.00241026	RF898	B6105_uncultured bacterium	Not differential
2ce12cf9b2e6a215b88756da2cf627b1	4.85981	Proteobacteria	Deltaproteobacteria	Myxococcales	Haliangiaceae	Haliangium	uncultured soil bacterium	0.00240893	RF899	B4872_Haliangium	Non-fer
778b0e24f65c9790390919a8bdabfceb	4.60517	Chloroflexi	Ktedonobacteria	Ktedonobacterales	Ktedonobacteraceae	HSB OF53-F07	uncultured bacterium	0.00240893	RF900	B201_HSB OF53-F07	Fer
45a748df4356242afe652996a4abb08f	6.04737	Proteobacteria	Deltaproteobacteria	Syntrophobacterales	Syntrophaceae	Desulfomonile	#N/A	0.00240893	RF901	B1634_Desulfomonile	Non-fer
KM205524.1.1459	4.68213	Bacteroidetes	Ignavibacteria	Kryptoniales	BSV26	uncultured soil bacterium	uncultured soil bacterium	0.00240549	RF902	B1360_uncultured soil bacterium	Non-fer
GQ339156.1.1479	5.04343	Fibrobacteres	Chitinivibrionia	uncultured	uncultured bacterium	uncultured bacterium	uncultured bacterium	0.00240356	RF903	B889_uncultured bacterium	Non-fer
JF231678.1.1358	4.43082	Bacteroidetes	Bacteroidia	Chitinophagales	Chitinophagaceae	uncultured	bacterium	0.0024	RF904	B3873_uncultured	Not differential
EU828408.1.1428	5.17048	Firmicutes	Clostridia	Clostridiales	Clostridiaceae 1	Clostridium sensu stricto 11	#N/A	0.0024	RF905	B4062_Clostridium sensu stricto 11	Not differential
778229643d02003d7fc30aff58978f2f	4.07754	Spirochaetes	Spirochaetia	Spirochaetales	Spirochaetaceae	Spirochaeta 2	Spirochaeta sp.	0.0024	RF906	B4558_Spirochaeta 2	Not differential
ae7ce6299a63d82785e6fb864ce86a1a	2.30259	Proteobacteria	Gammaproteobacteria	Cellvibrionales	Cellvibrionaceae	#N/A	#N/A	0.0024	RF907	B13386_f_Cellvibrionaceae	Not differential
7be2e7309e0d4c7e0b9f4ec077689a32	1.09861	Chloroflexi	Anaerolineae	uncultured	uncultured Chloroflexi bacterium	uncultured Chloroflexi bacterium	uncultured Chloroflexi bacterium	0.0024	RF908	B21497_uncultured Chloroflexi bacterium	Not differential
JN868875.1.1482	4.09434	Proteobacteria	Alphaproteobacteria	Reyranellales	Reyranellaceae	uncultured	uncultured soil bacterium	0.00239881	RF909	B10077_uncultured	Non-fer
JF204278.1.1369	5.47227	Actinobacteria	Thermoleophilia	Solirubrobacterales	67-14	#N/A	#N/A	0.00239782	RF910	B2864_f_67-14	Non-fer
6e07b19726d9c3acca024791777a6fea	4.77912	TA06	#N/A	#N/A	#N/A	#N/A	#N/A	0.00239782	RF911	B1771_o_NA	Non-fer
c48d40d2466c9d60083c35869cedac19	5.20949	Actinobacteria	Thermoleophilia	Gaiellales	uncultured	#N/A	#N/A	0.00238095	RF912	B4306_f_uncultured	Not differential
DQ450751.1.1387	6.47543	Bacteroidetes	Bacteroidia	Chitinophagales	Chitinophagaceae	uncultured	uncultured Ferruginibacter sp.	0.00237827	RF913	B294_uncultured	Not differential
aebbec7d348b8fea654b1b343067e63a	2.3979	Planctomycetes	Pla4 lineage	uncultured bacterium	uncultured bacterium	uncultured bacterium	uncultured bacterium	0.00237381	RF914	B8787_uncultured bacterium	Not differential
LN555032.1.1217	7.13648	Acidobacteria	Subgroup 6	#N/A	#N/A	#N/A	#N/A	0.0023717	RF915	B1202_o_NA	Non-fer
KJ783217.1.1480	3.43399	Proteobacteria	Deltaproteobacteria	SAR324 clade(Marine group B)	uncultured prokaryote	uncultured prokaryote	uncultured prokaryote	0.0023717	RF916	B9453_uncultured prokaryote	Fer
88a844fb1e4ecd60e2593ccfab5ee589	2.30259	#N/A	#N/A	#N/A	#N/A	#N/A	#N/A	0.00236905	RF917	B9403_o_NA	Not differential
KF956788.1.1470	5.77455	Actinobacteria	Thermoleophilia	Gaiellales	uncultured	#N/A	#N/A	0.00235854	RF918	B533_f_uncultured	Non-fer
FQ658753.1.1361	6.00881	Proteobacteria	Gammaproteobacteria	Betaproteobacteriales	Gallionellaceae	Sideroxydans	uncultured Gallionellaceae bacterium	0.00235714	RF919	B491_Sideroxydans	Non-fer
AB806459.1.1413	8.12829	Proteobacteria	Alphaproteobacteria	Rhizobiales	Methyloligellaceae	uncultured	#N/A	0.00235556	RF920	B67_uncultured	Not differential
JN590576.1.1302	6.79906	Proteobacteria	Gammaproteobacteria	Betaproteobacteriales	Burkholderiaceae	#N/A	#N/A	0.00234722	RF921	B285_f_Burkholderiaceae	Not differential
KX984117.1.1262	7.08423	Firmicutes	Clostridia	Clostridiales	Clostridiaceae 1	Clostridium sensu stricto 1	#N/A	0.00234722	RF922	B372_Clostridium sensu stricto 1	Not differential
7c3745dc4dc9d5925e0c16523a13fb73	1.38629	#N/A	#N/A	#N/A	#N/A	#N/A	#N/A	0.00234722	RF923	B15574_o_NA	Not differential
753a99e983f3535a0de88a7b884da2cd	4.5326	Bacteroidetes	Bacteroidia	Bacteroidales	SB-5	#N/A	#N/A	0.00234722	RF924	B2686_f_SB-5	Non-fer
2a199ef7b4e2fb00a413b84492984430	3.55535	Patescibacteria	ABY1	Candidatus Magasanikbacteria	uncultured bacterium	uncultured bacterium	uncultured bacterium	0.00234722	RF925	B10944_uncultured bacterium	Non-fer
EU528194.1.1340	6.95464	Proteobacteria	Gammaproteobacteria	Betaproteobacteriales	SC-I-84	#N/A	#N/A	0.00234389	RF926	B649_f_SC-I-84	Fer
JX505184.1.1417	7.66247	Chloroflexi	Anaerolineae	RBG-13-54-9	uncultured eubacterium WCHB1-50	uncultured eubacterium WCHB1-50	uncultured eubacterium WCHB1-50	0.00233613	RF927	B265_uncultured eubacterium WCHB1-50	Not differential
adc4ade5e13641a5972622a7932dcd23	2.30259	Latescibacteria	uncultured soil bacterium	uncultured soil bacterium	uncultured soil bacterium	uncultured soil bacterium	uncultured soil bacterium	0.00232857	RF928	B7593_uncultured soil bacterium	Not differential
JF167842.1.1344	5.90536	Gemmatimonadetes	Gemmatimonadetes	Gemmatimonadales	Gemmatimonadaceae	Gemmatimonas	uncultured soil bacterium	0.002325	RF929	B677_Gemmatimonas	Not differential
AB672228.1.1423	5.38907	Acidobacteria	Acidobacteriia	Solibacterales	Solibacteraceae (Subgroup 3)	#N/A	#N/A	0.0023243	RF930	B1358_f_Solibacteraceae (Subgroup 3)	Fer
CP003360.3288170.3289606	6.52356	Proteobacteria	Deltaproteobacteria	Syntrophobacterales	Syntrophaceae	Desulfomonile	uncultured Desulfomonile sp.	0.00232362	RF931	B481_Desulfomonile	Fer
KJ877472.1.1355	8.00001	Proteobacteria	Gammaproteobacteria	Betaproteobacteriales	Gallionellaceae	Candidatus Nitrotoga	#N/A	0.00231432	RF932	B77_Candidatus Nitrotoga	Not differential
b6f3f2a0b9961195b9324bdac4d63006	2.3979	Chloroflexi	Ktedonobacteria	Ktedonobacterales	Ktedonobacteraceae	1921-3	uncultured Ktedonobacter sp.	0.0023129	RF933	B3566_1921-3	Not differential
LN870933.1.1390	3.63759	Bacteroidetes	Bacteroidia	Sphingobacteriales	NS11-12 marine group	metagenome	metagenome	0.00230986	RF934	B4038_metagenome	Not differential
AM295534.1.1231	6.50728	Proteobacteria	Gammaproteobacteria	Betaproteobacteriales	Nitrosomonadaceae	mle1-7	uncultured beta proteobacterium	0.00230229	RF935	B536_mle1-7	Not differential
KY117527.1.1465	7.54961	Actinobacteria	Actinobacteria	Frankiales	Cryptosporangiaceae	Fodinicola	bacterium	0.00229483	RF936	B529_Fodinicola	Fer
AB486285.1.1393	5.73979	Proteobacteria	Deltaproteobacteria	Desulfuromonadales	Geobacteraceae	Geobacter	#N/A	0.00229319	RF937	B3881_Geobacter	Not differential
145ae39e8a25462242279455678f4611	4.21951	Firmicutes	Clostridia	Clostridiales	Family XI	Tepidimicrobium	[Clostridium ultunense] DSM 10521	0.00228968	RF938	B9391_Tepidimicrobium	Not differential
e7262bf9b44bff96fe113231b7cb0b8b	3.97029	#N/A	#N/A	#N/A	#N/A	#N/A	#N/A	0.00228725	RF939	B6744_o_NA	Not differential
JF719329.1.1360	7.49499	Proteobacteria	Gammaproteobacteria	Betaproteobacteriales	Burkholderiaceae	Polaromonas	#N/A	0.00228571	RF940	B583_Polaromonas	Non-fer
Y14636.1.1437	5.16479	Nitrospirae	Nitrospira	Nitrospirales	Nitrospiraceae	Nitrospira	Nitrospira sp.	0.00228571	RF941	B3765_Nitrospira	Not differential
a01b9b93718d497a398c4cd7c3cea5f5	4.07754	Chloroflexi	Anaerolineae	RBG-13-54-9	uncultured bacterium UASB_TL14	uncultured bacterium UASB_TL14	uncultured bacterium UASB_TL14	0.00228571	RF942	B5737_uncultured bacterium UASB_TL14	Non-fer
35f2b9a0395b713c9f1d9e575855517f	3.91202	Bacteroidetes	Ignavibacteria	Kryptoniales	BSV26	uncultured bacterium	uncultured bacterium	0.00228419	RF943	B8762_uncultured bacterium	Fer
FJ152858.1.1517	3.46574	Proteobacteria	Deltaproteobacteria	Myxococcales	bacteriap25	uncultured Desulfovibrionales bacterium	uncultured Desulfovibrionales bacterium	0.00227262	RF944	B6577_uncultured Desulfovibrionales bacterium	Not differential
JN023433.1.1479	6.10032	Actinobacteria	Acidimicrobiia	Microtrichales	#N/A	#N/A	#N/A	0.00227222	RF945	B691_o_Microtrichales	Fer
e53cd5da7a1adf50d608dc3084ce3508	4.38203	Hydrogenedentes	Hydrogenedentia	Hydrogenedentiales	Hydrogenedensaceae	#N/A	#N/A	0.00226786	RF946	B3194_f_Hydrogenedensaceae	Fer
EU937856.1.1388	3.89182	Proteobacteria	Deltaproteobacteria	Bdellovibrionales	Bdellovibrionaceae	Bdellovibrio	Bdellovibrio exovorus JSS	0.00226667	RF947	B4534_Bdellovibrio	Non-fer
EF019725.1.1406	4.86753	Proteobacteria	Deltaproteobacteria	MBNT15	#N/A	#N/A	#N/A	0.0022619	RF948	B3163_o_MBNT15	Non-fer
JQ798415.1.1483	4.23411	Bacteroidetes	Bacteroidia	Cytophagales	Cytophagaceae	Cytophaga	metagenome	0.00225882	RF949	B4733_Cytophaga	Fer
825b7a6bc6fa517cc0d3f74465b80e02	4.21951	Chloroflexi	Anaerolineae	RBG-13-54-9	#N/A	#N/A	#N/A	0.00225882	RF950	B3536_o_RBG-13-54-9	Not differential
8be64e67181023e55f691be86c9fcfc6	3.61092	Bacteroidetes	Bacteroidia	Chitinophagales	Saprospiraceae	uncultured	#N/A	0.00225882	RF951	B12361_uncultured	Not differential
f79b2b0c9d797d59e3c024edd7ce303f	4.52179	Actinobacteria	Acidimicrobiia	#N/A	#N/A	#N/A	#N/A	0.00225882	RF952	B3615_o_NA	Non-fer
98356675a5bf9fdf69431b22cd5506fb	4.66344	Actinobacteria	Actinobacteria	Micromonosporales	Micromonosporaceae	#N/A	#N/A	0.00225595	RF953	B7415_f_Micromonosporaceae	Not differential
EU801228.1.1454	6.29527	Proteobacteria	Alphaproteobacteria	Rhizobiales	Xanthobacteraceae	Pseudolabrys	#N/A	0.00225	RF954	B864_Pseudolabrys	Fer
AB511018.1.1477	1.60944	Proteobacteria	Deltaproteobacteria	Bdellovibrionales	Bacteriovoracaceae	Peredibacter	uncultured bacterium	0.00225	RF955	B17917_Peredibacter	Not differential
HE589845.1.1475	6.77079	Proteobacteria	Deltaproteobacteria	Desulfuromonadales	Geobacteraceae	Geobacter	uncultured Desulfuromonadales bacterium	0.00225	RF956	B70_Geobacter	Non-fer
JF134700.1.1366	7.16162	Proteobacteria	Gammaproteobacteria	Betaproteobacteriales	TRA3-20	uncultured Burkholderiaceae bacterium	uncultured Burkholderiaceae bacterium	0.00225	RF957	B146_uncultured Burkholderiaceae bacterium	Not differential
866b3c4e5f99cc4365ebaa0aa868d132	2.89037	Proteobacteria	Gammaproteobacteria	#N/A	#N/A	#N/A	#N/A	0.00224459	RF958	B8427_o_NA	Fer
FPLM01006635.27.1459	4.12713	Fibrobacteres	Fibrobacteria	Fibrobacterales	possible family 01	metagenome	metagenome	0.00223737	RF959	B4295_metagenome	Not differential
aeec70b15ec9cd5c0481aedf86e4984b	6.08222	Actinobacteria	Coriobacteriia	OPB41	#N/A	#N/A	#N/A	0.00223333	RF960	B1912_o_OPB41	Non-fer
5d566ca0d6d9ef6b1eb8c376f20590d2	2.83321	Patescibacteria	Parcubacteria	#N/A	#N/A	#N/A	#N/A	0.00223168	RF961	B8768_o_NA	Not differential
AB487608.1.1356	4.65396	Acidobacteria	Subgroup 21	uncultured soil bacterium	uncultured soil bacterium	uncultured soil bacterium	uncultured soil bacterium	0.00222734	RF962	B4561_uncultured soil bacterium	Not differential
JN391759.1.1523	2.19722	Kiritimatiellaeota	Kiritimatiellae	WCHB1-41	#N/A	#N/A	#N/A	0.002225	RF963	B18799_o_WCHB1-41	Not differential
1807c5b71c2bd24c858f220783c7278a	3.29584	Chloroflexi	Chloroflexia	Chloroflexales	Roseiflexaceae	uncultured	uncultured bacterium	0.002225	RF964	B8078_uncultured	Not differential
GU127795.1.1427	8.25479	Acidobacteria	Acidobacteriia	Acidobacteriales	uncultured	#N/A	#N/A	0.00222222	RF965	B239_f_uncultured	Not differential
FPLK01002412.16.1516	5.57595	Bacteroidetes	Bacteroidia	Sphingobacteriales	Lentimicrobiaceae	uncultured soil bacterium	uncultured soil bacterium	0.00222039	RF966	B685_uncultured soil bacterium	Fer
8d990c43a2e1e3373b18a422ba6edf1a	3.80666	Proteobacteria	Alphaproteobacteria	Thalassobaculales	uncultured	mucus bacterium 66	mucus bacterium 66	0.00221825	RF967	B2487_mucus bacterium 66	Not differential
5222c125cd45f950d1c6c4ba997bf552	4.09434	Chloroflexi	Chloroflexia	Chloroflexales	Chloroflexaceae	#N/A	#N/A	0.00221429	RF968	B8219_f_Chloroflexaceae	Not differential
KJ588870.1.1513	6.08222	Actinobacteria	Actinobacteria	Corynebacteriales	Mycobacteriaceae	Mycobacterium	#N/A	0.00220238	RF969	B3110_Mycobacterium	Not differential
b494dd8bb4e441738fb32b898d5f93eb	6.11368	Proteobacteria	Gammaproteobacteria	Diplorickettsiales	Diplorickettsiaceae	Aquicella	#N/A	0.00219365	RF970	B1553_Aquicella	Not differential
7500630ac891dda4bc7c99aed24594ba	3.04452	Planctomycetes	Phycisphaerae	Tepidisphaerales	WD2101 soil group	#N/A	#N/A	0.00219048	RF971	B15078_f_WD2101 soil group	Fer
5fa35093aadec6611fe3ea9cce17e736	5.21494	Proteobacteria	Deltaproteobacteria	Myxococcales	BIrii41	#N/A	#N/A	0.00218908	RF972	B5393_f_BIrii41	Fer
FJ479263.1.1494	5.2575	Proteobacteria	Gammaproteobacteria	Steroidobacterales	Steroidobacteraceae	#N/A	#N/A	0.00218803	RF973	B3148_f_Steroidobacteraceae	Fer
125e970c793d2b5a33bca80a95ff9618	4.8828	Cyanobacteria	Oxyphotobacteria	Nostocales	Nostocaceae	#N/A	#N/A	0.00218803	RF974	B6559_f_Nostocaceae	Non-fer
60bb81a2aa77565e17fd7d8a7f226ec4	5.54908	Nitrospirae	Thermodesulfovibrionia	uncultured	uncultured bacterium	uncultured bacterium	uncultured bacterium	0.00218571	RF975	B1063_uncultured bacterium	Non-fer
KC775391.1.1278	3.85015	Actinobacteria	Actinobacteria	Propionibacteriales	Nocardioidaceae	Nocardioides	#N/A	0.00218358	RF976	B11213_Nocardioides	Fer
EF516780.1.1446	6.7901	Gemmatimonadetes	Gemmatimonadetes	Gemmatimonadales	Gemmatimonadaceae	Gemmatimonas	#N/A	0.00218182	RF977	B1059_Gemmatimonas	Not differential
GU208322.1.1466	7.56216	Nitrospinae	P9X2b3D02	uncultured prokaryote	uncultured prokaryote	uncultured prokaryote	uncultured prokaryote	0.00217836	RF978	B224_uncultured prokaryote	Not differential
FPLS01042139.11.1536	3.52636	Dependentiae	Babeliae	Babeliales	Vermiphilaceae	metagenome	metagenome	0.00217778	RF979	B8742_metagenome	Not differential
FJ592892.1.1367	6.75809	Chloroflexi	Anaerolineae	Anaerolineales	Anaerolineaceae	uncultured	#N/A	0.00217778	RF980	B896_uncultured	Not differential
518a671c295a498dddebb90cc76e4ef7	6.05444	Chloroflexi	Anaerolineae	SBR1031	#N/A	#N/A	#N/A	0.00217778	RF981	B1869_o_SBR1031	Not differential
HQ190364.1.1507	3.17805	Proteobacteria	Gammaproteobacteria	Diplorickettsiales	Diplorickettsiaceae	uncultured	uncultured bacterium	0.00215882	RF982	B5627_uncultured	Not differential
5257ca4c0d581a7b5a221f6ca839e72f	6.24028	Actinobacteria	Thermoleophilia	Gaiellales	uncultured	#N/A	#N/A	0.00215352	RF983	B820_f_uncultured	Not differential
AB672159.1.1453	6.14847	Bacteroidetes	Bacteroidia	Chitinophagales	Chitinophagaceae	Dinghuibacter	#N/A	0.00214912	RF984	B1083_Dinghuibacter	Non-fer
AB240368.1.1441	6.27852	Chloroflexi	Chloroflexia	Chloroflexales	Roseiflexaceae	uncultured	uncultured bacterium	0.00214912	RF985	B850_uncultured	Non-fer
769f8d09e65e0917fd601bc584ef1e33	3.29584	Acidobacteria	Thermoanaerobaculia	Thermoanaerobaculales	Thermoanaerobaculaceae	TPD-58	uncultured bacterium	0.00214912	RF986	B10015_TPD-58	Fer
c136fc6a31a409a93913b0d8262d66d7	4.70953	Planctomycetes	Planctomycetacia	Pirellulales	Pirellulaceae	#N/A	#N/A	0.00214912	RF987	B2438_f_Pirellulaceae	Fer
FJ562181.1.1201	6.98841	Proteobacteria	Alphaproteobacteria	Caulobacterales	Caulobacteraceae	Brevundimonas	#N/A	0.00214319	RF988	B1170_Brevundimonas	Fer
493e0cd065471a499e34fef17d60d3da	4.00733	WS4	uncultured bacterium	uncultured bacterium	uncultured bacterium	uncultured bacterium	uncultured bacterium	0.00214118	RF989	B3555_uncultured bacterium	Not differential
KC541181.1.1494	4.11087	Acidobacteria	Acidobacteriia	Solibacterales	Solibacteraceae (Subgroup 3)	Bryobacter	#N/A	0.00213775	RF990	B4011_Bryobacter	Fer
a975cf2477e58778ebc2c4cd258050da	6.06843	Proteobacteria	Deltaproteobacteria	Myxococcales	uncultured	uncultured Archangiaceae bacterium	uncultured Archangiaceae bacterium	0.00213675	RF991	B445_uncultured Archangiaceae bacterium	Not differential
FJ466268.1.1417	7.44073	Proteobacteria	Alphaproteobacteria	Acetobacterales	Acetobacteraceae	uncultured	bacterium enrichment culture clone auto142_4W	0.00213575	RF992	B405_uncultured	Not differential
e3631e7ac733131de72f8065157f831c	3.80666	Elusimicrobia	Elusimicrobia	MVP-88	uncultured bacterium	uncultured bacterium	uncultured bacterium	0.00213333	RF1000	B8584_uncultured bacterium	Not differential
AB486341.1.1395	7.08506	Gemmatimonadetes	S0134 terrestrial group	uncultured bacterium	uncultured bacterium	uncultured bacterium	uncultured bacterium	0.00213333	RF993	B166_uncultured bacterium	Not differential
LN870694.1.1415	4.90527	Proteobacteria	Deltaproteobacteria	NKB15	uncultured bacterium	uncultured bacterium	uncultured bacterium	0.00213333	RF994	B5496_uncultured bacterium	Not differential
GQ397025.1.1454	5.6058	Proteobacteria	Alphaproteobacteria	Rhizobiales	Xanthobacteraceae	Pseudolabrys	#N/A	0.00213333	RF995	B555_Pseudolabrys	Fer
AM157317.1.1235	5.42935	Proteobacteria	Deltaproteobacteria	Myxococcales	Blfdi19	uncultured bacterium	uncultured bacterium	0.00213333	RF996	B2916_uncultured bacterium	Not differential
8d174109455027962947d85bbb6d9159	5.6204	Chloroflexi	Anaerolineae	RBG-13-54-9	uncultured Caldilineaceae bacterium	uncultured Caldilineaceae bacterium	uncultured Caldilineaceae bacterium	0.00213333	RF997	B778_uncultured Caldilineaceae bacterium	Non-fer
5854f37077ba962c23fa8b8876f1b8c7	2.70805	Proteobacteria	Alphaproteobacteria	Azospirillales	Inquilinaceae	Inquilinus	#N/A	0.00213333	RF998	B16035_Inquilinus	Fer
f55f3223cb13ba8f5ac8a00a79619752	3.04452	Firmicutes	Clostridia	Clostridiales	Ruminococcaceae	Sporobacter	#N/A	0.00213333	RF999	B11004_Sporobacter	Fer
HM243778.1.1499	4.84419	Proteobacteria	Gammaproteobacteria	Betaproteobacteriales	#N/A	#N/A	#N/A	0.00213333	RF1001	B4050_o_Betaproteobacteriales	Not differential
442908287d9fadcea63b55649310d6a7	4.72739	Elusimicrobia	Elusimicrobia	MVP-88	uncultured bacterium	uncultured bacterium	uncultured bacterium	0.00213029	RF1002	B2927_uncultured bacterium	Not differential
KT182558.1.1490	4.90527	Bacteroidetes	Bacteroidia	Chitinophagales	Chitinophagaceae	Flavihumibacter	uncultured Flavihumibacter sp.	0.00213025	RF1003	B3580_Flavihumibacter	Not differential
fd77ea34038d5725b7c6edbade118211	2.19722	#N/A	#N/A	#N/A	#N/A	#N/A	#N/A	0.00213025	RF1004	B12039_o_NA	Not differential
HM445515.1.1349	4.18965	Planctomycetes	Planctomycetacia	Gemmatales	Gemmataceae	uncultured	uncultured Planctomycetia bacterium	0.00212549	RF1005	B2078_uncultured	Not differential
LC168890.1.1250	5.8999	Proteobacteria	Deltaproteobacteria	Deltaproteobacteria Incertae Sedis	Unknown Family	Deferrisoma	uncultured delta proteobacterium	0.00211111	RF1006	B1154_Deferrisoma	Not differential
EF515998.1.1439	4.7185	Armatimonadetes	Fimbriimonadia	Fimbriimonadales	Fimbriimonadaceae	#N/A	#N/A	0.00210909	RF1007	B2472_f_Fimbriimonadaceae	Not differential
ed8877511adf3e839eb70c2aeeeebe65	4.49981	Planctomycetes	Phycisphaerae	Tepidisphaerales	CPla-3 termite group	metagenome	metagenome	0.0021	RF1008	B2582_metagenome	Not differential
a93aeea6b1cb3e784dd79e36b169d7c2	5.99396	Actinobacteria	MB-A2-108	uncultured Streptomyces sp.	uncultured Streptomyces sp.	uncultured Streptomyces sp.	uncultured Streptomyces sp.	0.00209817	RF1009	B1041_uncultured Streptomyces sp.	Non-fer
JX079211.1.1500	5.2832	Actinobacteria	Thermoleophilia	Gaiellales	uncultured	uncultured prokaryote	uncultured prokaryote	0.00209524	RF1010	B1369_uncultured prokaryote	Non-fer
5b5ec0dcda7bc95aecf451fdf22bf594	1.60944	Kiritimatiellaeota	Kiritimatiellae	WCHB1-41	uncultured Verrucomicrobia bacterium	uncultured Verrucomicrobia bacterium	uncultured Verrucomicrobia bacterium	0.00208811	RF1011	B20231_uncultured Verrucomicrobia bacterium	Not differential
74ba32af7c2aae95f23a8052bf129fcc	4.81218	Acidobacteria	Subgroup 18	#N/A	#N/A	#N/A	#N/A	0.00207763	RF1012	B3731_o_NA	Fer
KP201099.1.1211	7.34536	Proteobacteria	Gammaproteobacteria	Pseudomonadales	Pseudomonadaceae	Pseudomonas	#N/A	0.00207692	RF1013	B319_Pseudomonas	Not differential
HQ729791.1.1458	5.39816	Acidobacteria	Acidobacteriia	Solibacterales	Solibacteraceae (Subgroup 3)	#N/A	#N/A	0.00207692	RF1014	B3981_f_Solibacteraceae (Subgroup 3)	Not differential
AB234281.1.1489	5.84354	Planctomycetes	Planctomycetacia	Pirellulales	Pirellulaceae	Pir2 lineage	uncultured bacterium	0.00207692	RF1015	B1284_Pir2 lineage	Not differential
AY212574.1.1520	4.89784	Proteobacteria	Gammaproteobacteria	Cellvibrionales	Cellvibrionaceae	Cellvibrio	uncultured Cellvibrio sp.	0.00207692	RF1016	B1725_Cellvibrio	Non-fer
d18865d447327ab3f1a91e938389ff75	4.78749	Firmicutes	Clostridia	Clostridiales	Ruminococcaceae	#N/A	#N/A	0.00207692	RF1017	B6921_f_Ruminococcaceae	Not differential
23b2339c9f4e4f73c92ad0639a43062c	3.93183	Armatimonadetes	Fimbriimonadia	Fimbriimonadales	Fimbriimonadaceae	uncultured Armatimonadetes bacterium	uncultured Armatimonadetes bacterium	0.00207598	RF1018	B5611_uncultured Armatimonadetes bacterium	Not differential
98e333941fa413f411f05fc8790d9bb5	2.48491	Verrucomicrobia	Verrucomicrobiae	Verrucomicrobiales	Verrucomicrobiaceae	Roseimicrobium	metagenome	0.00204503	RF1019	B7416_Roseimicrobium	Not differential
HM748665.1.1464	3.8712	Actinobacteria	Thermoleophilia	Gaiellales	uncultured	bacterium Ellin6517	bacterium Ellin6517	0.00203175	RF1020	B1076_bacterium Ellin6517	Fer
72e146d2625f3b971c8f29966aaf27cf	4.67283	Hydrogenedentes	Hydrogenedentia	Hydrogenedentiales	Hydrogenedensaceae	#N/A	#N/A	0.00203175	RF1021	B1325_f_Hydrogenedensaceae	Not differential
HM263196.1.1366	6.47543	Actinobacteria	Thermoleophilia	Solirubrobacterales	Solirubrobacteraceae	Conexibacter	#N/A	0.00202176	RF1022	B57_Conexibacter	Non-fer
ad232df10aaeb6894f449cef25c64cba	4.56435	Bacteroidetes	Bacteroidia	Bacteroidales	Bacteroidetes BD2-2	#N/A	#N/A	0.00202105	RF1023	B2883_f_Bacteroidetes BD2-2	Fer
EF516561.1.1477	7.14283	Acidobacteria	Subgroup 6	#N/A	#N/A	#N/A	#N/A	0.00201667	RF1024	B428_o_NA	Fer
JX272000.1.1486	6.38012	Bacteroidetes	Bacteroidia	Bacteroidales	SB-5	#N/A	#N/A	0.00201667	RF1025	B1033_f_SB-5	Fer
7783a9708efd90f724f1da031e2fcb38	3.17805	Actinobacteria	Coriobacteriia	CG2-30-50-142	Actinobacteria bacterium CG2_30_50_142	Actinobacteria bacterium CG2_30_50_142	Actinobacteria bacterium CG2_30_50_142	0.00201667	RF1026	B8774_Actinobacteria bacterium CG2_30_50_142	Not differential
f7ccb75c2acd988980bbe6ef66d134fe	4.8828	Planctomycetes	Phycisphaerae	Phycisphaerales	AKAU3564 sediment group	uncultured organism	uncultured organism	0.00201667	RF1027	B2328_uncultured organism	Not differential
1f4e426dcc4ccf5740f30e33649f754c	3.3322	#N/A	#N/A	#N/A	#N/A	#N/A	#N/A	0.00201667	RF1028	B9189_o_NA	Not differential
5e88131ceb66f80c463d03986ae890a8	4.76217	Chloroflexi	TK10	uncultured bacterium	uncultured bacterium	uncultured bacterium	uncultured bacterium	0.00201667	RF1029	B1294_uncultured bacterium	Not differential
e36598dac32f614acaa1cae4b9295632	3.8712	Chloroflexi	Anaerolineae	SBR1031	uncultured Gemmatimonadetes bacterium	uncultured Gemmatimonadetes bacterium	uncultured Gemmatimonadetes bacterium	0.00200787	RF1030	B2281_uncultured Gemmatimonadetes bacterium	Fer
AY214184.1.1537	7.34666	Proteobacteria	Deltaproteobacteria	Desulfuromonadales	Geobacteraceae	Geobacter	#N/A	0.002	RF1031	B1257_Geobacter	Not differential
AB252954.1.1516	6.99118	Proteobacteria	Deltaproteobacteria	Myxococcales	Archangiaceae	Anaeromyxobacter	#N/A	0.002	RF1032	B648_Anaeromyxobacter	Not differential
37160ac3c80f20d9ac1ebc99b071ef8f	6.34739	Chloroflexi	Chloroflexia	Chloroflexales	Roseiflexaceae	#N/A	#N/A	0.002	RF1033	B1021_f_Roseiflexaceae	Not differential
08c46440ad2dcf882a67ce79829b8304	3.2581	Chloroflexi	Ktedonobacteria	Ktedonobacterales	JG30-KF-AS9	#N/A	#N/A	0.002	RF1034	B10937_f_JG30-KF-AS9	Not differential
38e6dd8248deff3273583b219f5d23d4	5.10595	Bacteroidetes	Ignavibacteria	Kryptoniales	BSV26	uncultured Chlorobi bacterium	uncultured Chlorobi bacterium	0.002	RF1035	B1367_uncultured Chlorobi bacterium	Fer
DQ676382.1.1369	3.52636	Patescibacteria	Microgenomatia	Candidatus Woesebacteria	uncultured Microgenomates group bacterium	uncultured Microgenomates group bacterium	uncultured Microgenomates group bacterium	0.00198529	RF1036	B9423_uncultured Microgenomates group bacterium	Fer
KC432060.1.1232	5.96358	Proteobacteria	Deltaproteobacteria	Myxococcales	BIrii41	uncultured soil bacterium	uncultured soil bacterium	0.00198529	RF1037	B1391_uncultured soil bacterium	Fer
EU135184.1.1390	3.8712	Planctomycetes	Planctomycetacia	Gemmatales	Gemmataceae	Gemmata	#N/A	0.00198529	RF1038	B4928_Gemmata	Not differential
AY212695.1.1398	1.79176	Verrucomicrobia	Verrucomicrobiae	Verrucomicrobiales	Verrucomicrobiaceae	uncultured	uncultured Verrucomicrobia bacterium	0.00198529	RF1039	B19889_uncultured	Not differential
FJ592599.1.1395	4.00733	Bacteroidetes	Bacteroidia	Bacteroidales	Paludibacteraceae	Paludibacter	#N/A	0.00198529	RF1040	B4586_Paludibacter	Not differential
949c79b9752796dcf41f1b07b09a492b	3.3322	Bacteroidetes	Bacteroidia	Chitinophagales	uncultured	uncultured soil bacterium	uncultured soil bacterium	0.00198036	RF1041	B3546_uncultured soil bacterium	Not differential
HQ178845.1.1481	6.44731	Proteobacteria	Deltaproteobacteria	Desulfobacterales	Desulfobulbaceae	Desulfobulbus	uncultured Desulfobulbus sp.	0.00195564	RF1042	B1415_Desulfobulbus	Non-fer
b44ec5122d943d3c8877263f4f47fd50	4.66344	Chloroflexi	Chloroflexia	Chloroflexales	Roseiflexaceae	Kouleothrix	#N/A	0.00194805	RF1043	B3417_Kouleothrix	Not differential
893fcaaa34b3fb7f9a24a42cb8118ae7	6.02828	Chloroflexi	SHA-26	uncultured bacterium	uncultured bacterium	uncultured bacterium	uncultured bacterium	0.00193529	RF1044	B1009_uncultured bacterium	Non-fer
KX239078.1.1518	5.50939	Verrucomicrobia	Verrucomicrobiae	Chthoniobacterales	Chthoniobacteraceae	Candidatus Udaeobacter	#N/A	0.00193421	RF1045	B370_Candidatus Udaeobacter	Fer
05667526b015fd1e83fac4a43ef48cec	3.21888	Hydrogenedentes	Hydrogenedentia	Hydrogenedentiales	Hydrogenedensaceae	#N/A	#N/A	0.00192857	RF1046	B8703_f_Hydrogenedensaceae	Not differential
a704835eb2f18fea2bb2de7394c2b7c4	4.27667	Bacteroidetes	Ignavibacteria	Kryptoniales	BSV26	denitrifying bacterium enrichment culture clone NOA_1_E9	denitrifying bacterium enrichment culture clone NOA_1_E9	0.00192857	RF1047	B1867_denitrifying bacterium enrichment culture clone NOA_1_E9	Not differential
GQ263706.1.1489	4.79579	Zixibacteria	uncultured bacterium	uncultured bacterium	uncultured bacterium	uncultured bacterium	uncultured bacterium	0.00191737	RF1048	B2525_uncultured bacterium	Not differential
FQ659407.1.1359	8.05389	Proteobacteria	Gammaproteobacteria	Betaproteobacteriales	Gallionellaceae	Sideroxydans	#N/A	0.00190476	RF1049	B27_Sideroxydans	Non-fer
2dd8478ac1cccf01ab08a4f277618821	4.51086	Chloroflexi	Anaerolineae	Anaerolineales	Anaerolineaceae	uncultured	uncultured Anaerolineaceae bacterium	0.0018947	RF1050	B1764_uncultured	Non-fer
CP001287.2484826.2486304	5.16479	Cyanobacteria	Oxyphotobacteria	Nostocales	Microcystaceae	Cyanothece PCC-8801	Cyanothece sp. PCC 8801	0.00189387	RF1051	B2747_Cyanothece PCC-8801	Fer
bbe88fd0a682df5b49d2447fc3717d83	5.59099	Zixibacteria	uncultured prokaryote	uncultured prokaryote	uncultured prokaryote	uncultured prokaryote	uncultured prokaryote	0.00188803	RF1052	B952_uncultured prokaryote	Fer
2afad842c88b3184817966ce9986d974	4.38203	Proteobacteria	Deltaproteobacteria	Myxococcales	Haliangiaceae	Haliangium	#N/A	0.00188095	RF1053	B8655_Haliangium	Not differential
HQ385545.1.1411	5.82008	Proteobacteria	Deltaproteobacteria	Myxococcales	#N/A	#N/A	#N/A	0.00187778	RF1054	B1353_o_Myxococcales	Non-fer
HM243802.1.1534	6.01127	Verrucomicrobia	Verrucomicrobiae	Pedosphaerales	Pedosphaeraceae	uncultured Prosthecobacter sp.	uncultured Prosthecobacter sp.	0.001875	RF1055	B1801_uncultured Prosthecobacter sp.	Non-fer
JN023700.1.1456	5.19296	Proteobacteria	Alphaproteobacteria	#N/A	#N/A	#N/A	#N/A	0.001875	RF1056	B4760_o_NA	Non-fer
DQ125512.1.1454	3.93183	Chloroflexi	Ktedonobacteria	Ktedonobacterales	JG30-KF-AS9	uncultured bacterium	uncultured bacterium	0.001875	RF1057	B3124_uncultured bacterium	Not differential
HM335467.1.1308	7.02909	Proteobacteria	Alphaproteobacteria	Rhizobiales	Beijerinckiaceae	alphaI cluster	#N/A	0.001875	RF1058	B638_alphaI cluster	Not differential
AB486049.1.1397	5.65599	Planctomycetes	Planctomycetacia	Gemmatales	Gemmataceae	uncultured	uncultured bacterium	0.001875	RF1059	B1452_uncultured	Not differential
EU132102.1.1326	6.24611	Acidobacteria	Holophagae	Subgroup 7	uncultured Desulfovirga sp.	uncultured Desulfovirga sp.	uncultured Desulfovirga sp.	0.001875	RF1060	B1578_uncultured Desulfovirga sp.	Fer
EF632927.1.1251	6.00389	Firmicutes	Clostridia	Clostridiales	Clostridiaceae 1	Clostridium sensu stricto 13	#N/A	0.001875	RF1061	B598_Clostridium sensu stricto 13	Fer
LMYF01004894.7194.8733	4.45435	Verrucomicrobia	Verrucomicrobiae	Opitutales	Opitutaceae	Lacunisphaera	#N/A	0.001875	RF1062	B2556_Lacunisphaera	Non-fer
f75b2213fe31c575f4c9e66c5719228d	2.94444	Proteobacteria	Gammaproteobacteria	Pseudomonadales	Pseudomonadaceae	#N/A	#N/A	0.00187451	RF1063	B15665_f_Pseudomonadaceae	Not differential
e0ed72d154cb56f0c3de14ef242686f1	3.46574	Elusimicrobia	Elusimicrobia	MVP-88	uncultured bacterium	uncultured bacterium	uncultured bacterium	0.00187083	RF1064	B7142_uncultured bacterium	Not differential
7a32cd5f2197a6e044963231830db3af	3.43399	Nitrospirae	4-29-1	#N/A	#N/A	#N/A	#N/A	0.00187083	RF1065	B4674_o_NA	Not differential
9c7e1ef431b89e51458abbdf8e6c4143	4.99721	Planctomycetes	Planctomycetacia	Isosphaerales	Isosphaeraceae	Aquisphaera	#N/A	0.00187083	RF1066	B795_Aquisphaera	Not differential
HM921130.1.1322	3.73767	Bacteroidetes	Bacteroidia	Sphingobacteriales	env.OPS 17	uncultured Bacteroidetes bacterium	uncultured Bacteroidetes bacterium	0.00187045	RF1067	B4388_uncultured Bacteroidetes bacterium	Not differential
7023e42f8a3014b1019ab6714e60632d	4.45435	Chloroflexi	Chloroflexia	Thermomicrobiales	JG30-KF-CM45	uncultured anaerobic ammonium-oxidizing bacterium	uncultured anaerobic ammonium-oxidizing bacterium	0.00187034	RF1068	B6979_uncultured anaerobic ammonium-oxidizing bacterium	Not differential
9bfffd34d3fc58a3176353c9ddc231d5	4.12713	Acidobacteria	Aminicenantia	Aminicenantales	#N/A	#N/A	#N/A	0.00187013	RF1069	B2847_o_Aminicenantales	Fer
HM269183.1.1357	5.51745	Proteobacteria	Gammaproteobacteria	Diplorickettsiales	Diplorickettsiaceae	Aquicella	#N/A	0.00186975	RF1070	B2066_Aquicella	Fer
2db75b0a82e6f5d3f9fa21417e06e789	2.3979	Omnitrophicaeota	uncultured organism	uncultured organism	uncultured organism	uncultured organism	uncultured organism	0.00186975	RF1071	B16804_uncultured organism	Not differential
JX505393.1.1421	4.04305	Chloroflexi	SHA-26	uncultured Anaerolineaceae bacterium	uncultured Anaerolineaceae bacterium	uncultured Anaerolineaceae bacterium	uncultured Anaerolineaceae bacterium	0.00186923	RF1072	B6120_uncultured Anaerolineaceae bacterium	Fer
EU937836.1.1449	8.33399	Proteobacteria	Alphaproteobacteria	Rhizobiales	Xanthobacteraceae	#N/A	#N/A	0.00186667	RF1073	B10_f_Xanthobacteraceae	Non-fer
AB486215.1.1345	6.6053	Proteobacteria	Gammaproteobacteria	Betaproteobacteriales	Burkholderiaceae	#N/A	#N/A	0.00186607	RF1074	B1432_f_Burkholderiaceae	Not differential
KJ540794.1.1479	4.75359	Proteobacteria	Deltaproteobacteria	Myxococcales	BIrii41	uncultured Sorangiineae bacterium	uncultured Sorangiineae bacterium	0.00186111	RF1075	B2657_uncultured Sorangiineae bacterium	Non-fer
CU922361.1.1307	4.27667	Proteobacteria	Alphaproteobacteria	Rhizobiales	Rhizobiaceae	#N/A	#N/A	0.00186111	RF1076	B9172_f_Rhizobiaceae	Not differential
AY963495.1.1421	6.13123	Acidobacteria	Acidobacteriia	Solibacterales	Solibacteraceae (Subgroup 3)	Candidatus Solibacter	#N/A	0.00186058	RF1077	B1081_Candidatus Solibacter	Not differential
DQ404752.1.1451	4.04305	Proteobacteria	Alphaproteobacteria	Rhizobiales	Rhizobiales Incertae Sedis	Bauldia	#N/A	0.00186058	RF1078	B1934_Bauldia	Not differential
1cecac94172235f6a051d7e2d43ef7b9	2.30259	Dependentiae	Babeliae	Babeliales	#N/A	#N/A	#N/A	0.00185714	RF1079	B18127_o_Babeliales	Not differential
KR110063.1.1528	2.56495	Omnitrophicaeota	Omnitrophia	Omnitrophales	Omnitrophaceae	Candidatus Omnitrophus	#N/A	0.00185641	RF1080	B8750_Candidatus Omnitrophus	Not differential
LN870743.1.1376	3.66356	Acidobacteria	Subgroup 20	uncultured bacterium	uncultured bacterium	uncultured bacterium	uncultured bacterium	0.00185307	RF1081	B3237_uncultured bacterium	Not differential
f0aeff0c8b10a931bf2c1ef505074e9e	4.77912	Actinobacteria	Thermoleophilia	Gaiellales	uncultured	uncultured Conexibacteraceae bacterium	uncultured Conexibacteraceae bacterium	0.00185307	RF1082	B3997_uncultured Conexibacteraceae bacterium	Non-fer
HM459661.1.1467	4.91998	Actinobacteria	Thermoleophilia	Gaiellales	uncultured	bacterium Ellin7530	bacterium Ellin7530	0.00185165	RF1083	B2887_bacterium Ellin7530	Fer
3bfbd3c49d4768e37b15b1ce1d5f33e4	2.77259	Chloroflexi	SHA-26	uncultured Chloroflexi bacterium	uncultured Chloroflexi bacterium	uncultured Chloroflexi bacterium	uncultured Chloroflexi bacterium	0.00185	RF1084	B3984_uncultured Chloroflexi bacterium	Non-fer
EF594053.1.1456	4.47734	Chloroflexi	Anaerolineae	Ardenticatenales	uncultured	uncultured prokaryote	uncultured prokaryote	0.00184659	RF1085	B3441_uncultured prokaryote	Fer
2837e671bba4ada75d622cc4a86458a6	5.52943	Chloroflexi	Anaerolineae	Anaerolineales	Anaerolineaceae	uncultured	#N/A	0.00184615	RF1086	B2307_uncultured	Not differential
61a689d79a98ababa301a40052aabf02	4.52179	Chloroflexi	Anaerolineae	RBG-13-54-9	uncultured sludge bacterium A31	uncultured sludge bacterium A31	uncultured sludge bacterium A31	0.00184524	RF1087	B2506_uncultured sludge bacterium A31	Not differential
FJ719036.1.1411	6.67582	Proteobacteria	Alphaproteobacteria	Sphingomonadales	Sphingomonadaceae	#N/A	#N/A	0.00183974	RF1088	B1330_f_Sphingomonadaceae	Not differential
e73bae01122bfb0ecc47f1da81d74fff	3.04452	Acidobacteria	Subgroup 25	uncultured Acidobacteria bacterium	uncultured Acidobacteria bacterium	uncultured Acidobacteria bacterium	uncultured Acidobacteria bacterium	0.00183974	RF1089	B5515_uncultured Acidobacteria bacterium	Not differential
1a926698b8ba90cc5aaa7a6fd5491ac8	4.11087	Chloroflexi	#N/A	#N/A	#N/A	#N/A	#N/A	0.0018375	RF1090	B7496_o_NA	Not differential
KJ754661.1.1226	3.04452	Proteobacteria	Gammaproteobacteria	#N/A	#N/A	#N/A	#N/A	0.00183333	RF1091	B11215_o_NA	Not differential
JF181933.1.1308	4.06044	Proteobacteria	Alphaproteobacteria	Acetobacterales	Acetobacteraceae	uncultured	#N/A	0.00183217	RF1092	B2777_uncultured	Non-fer
94cc00e2a8a1c454c71f8ffd5bf0199b	3.17805	Firmicutes	Clostridia	Clostridiales	Heliobacteriaceae	Hydrogenispora	#N/A	0.00183007	RF1093	B7294_Hydrogenispora	Not differential
AM934825.1.1337	4.43082	Chloroflexi	JG30-KF-CM66	metagenome	metagenome	metagenome	metagenome	0.00182721	RF1094	B5414_metagenome	Fer
828e8fa8527b4df2559b076b29786f7f	3.09104	#N/A	#N/A	#N/A	#N/A	#N/A	#N/A	0.00182639	RF1095	B7913_o_NA	Not differential
EF515980.1.1463	3.46574	Proteobacteria	Deltaproteobacteria	Myxococcales	Sandaracinaceae	uncultured	#N/A	0.00182308	RF1096	B4031_uncultured	Non-fer
JN038842.1.1478	3.2581	Bacteroidetes	Ignavibacteria	SJA-28	uncultured soil bacterium	uncultured soil bacterium	uncultured soil bacterium	0.00182222	RF1097	B5856_uncultured soil bacterium	Not differential
KX035298.1.1384	5.44242	Actinobacteria	Actinobacteria	Corynebacteriales	Mycobacteriaceae	Mycobacterium	#N/A	0.00181944	RF1098	B4671_Mycobacterium	Fer
HM187283.1.1511	4.41884	Planctomycetes	Pla4 lineage	uncultured planctomycete	uncultured planctomycete	uncultured planctomycete	uncultured planctomycete	0.00181818	RF1099	B4073_uncultured planctomycete	Not differential
KM386847.1.1983	1.38629	Cyanobacteria	Oxyphotobacteria	Pseudanabaenales	Pseudanabaenaceae	Pseudanabaena PCC-7429	Pseudanabaena minima CHAB705	0.00181667	RF1100	B20074_Pseudanabaena PCC-7429	Not differential
0da761af4701ab74271fb76e7ba0c1cd	3.68888	Firmicutes	Negativicutes	Selenomonadales	Veillonellaceae	#N/A	#N/A	0.00181667	RF1101	B11929_f_Veillonellaceae	Not differential
EU808401.1.1346	4.31749	Proteobacteria	Gammaproteobacteria	Xanthomonadales	Xanthomonadaceae	Stenotrophomonas	#N/A	0.00181513	RF1102	B8972_Stenotrophomonas	Fer
e6da2c4637c61b2ffe12740f6fe24a46	2.56495	#N/A	#N/A	#N/A	#N/A	#N/A	#N/A	0.00181513	RF1103	B14940_o_NA	Not differential
KC921193.1.1408	6.37843	Proteobacteria	Deltaproteobacteria	Desulfarculales	Desulfarculaceae	uncultured	delta proteobacterium WX81	0.0018125	RF1104	B1375_uncultured	Not differential
JF703332.1.1426	5.00395	Bacteroidetes	Bacteroidia	Cytophagales	Microscillaceae	#N/A	#N/A	0.00181197	RF1105	B3330_f_Microscillaceae	Fer
f019efaf8601fde63648584aae53d14b	4.96284	Planctomycetes	Planctomycetacia	Pirellulales	Pirellulaceae	uncultured	uncultured soil bacterium	0.00181197	RF1106	B1877_uncultured	Non-fer
JX222349.1.1506	4.12713	Armatimonadetes	uncultured	uncultured bacterium SJA-176	uncultured bacterium SJA-176	uncultured bacterium SJA-176	uncultured bacterium SJA-176	0.00180952	RF1107	B2512_uncultured bacterium SJA-176	Fer
1f4028ecbf2cdb1e135101d96f4b4bfb	0.693147	Proteobacteria	Gammaproteobacteria	Gammaproteobacteria Incertae Sedis	Unknown Family	Candidatus Berkiella	uncultured bacterium	0.00180909	RF1108	B19225_Candidatus Berkiella	Not differential
c89ef24d6f4575ef9ae750541acc0d05	2.07944	WOR-1	uncultured bacterium	uncultured bacterium	uncultured bacterium	uncultured bacterium	uncultured bacterium	0.00179798	RF1109	B9787_uncultured bacterium	Non-fer
JN672017.1.1288	5.58725	Bacteroidetes	Bacteroidia	Cytophagales	Microscillaceae	OLB12	uncultured prokaryote	0.00179464	RF1110	B679_OLB12	Not differential
FQ659631.1.1345	3.98898	Planctomycetes	Planctomycetacia	Pirellulales	Pirellulaceae	Candidatus Anammoximicrobium	uncultured soil bacterium	0.00178947	RF1111	B6778_Candidatus Anammoximicrobium	Not differential
7ee678e0b28dc8f25a1bc03a6ce5f721	4.27667	#N/A	#N/A	#N/A	#N/A	#N/A	#N/A	0.00178947	RF1112	B4194_o_NA	Fer
JF189243.1.1342	7.22984	Actinobacteria	Actinobacteria	Micrococcales	Microbacteriaceae	#N/A	#N/A	0.00178571	RF1113	B1253_f_Microbacteriaceae	Not differential
JF198868.1.1366	8.03593	Proteobacteria	Gammaproteobacteria	Xanthomonadales	Xanthomonadaceae	Arenimonas	#N/A	0.00178168	RF1114	B333_Arenimonas	Not differential
KP749324.1.1352	6.68711	Proteobacteria	Alphaproteobacteria	Rhizobiales	Devosiaceae	Devosia	#N/A	0.00177778	RF1115	B2054_Devosia	Non-fer
FQ658614.1.1351	5.4848	Proteobacteria	Deltaproteobacteria	Myxococcales	Haliangiaceae	Haliangium	uncultured soil bacterium	0.00177778	RF1116	B1928_Haliangium	Not differential
FJ791174.1.1415	5.28827	Actinobacteria	Actinobacteria	Micrococcales	Cellulomonadaceae	Cellulomonas	#N/A	0.00177778	RF1117	B5140_Cellulomonas	Fer
d8b09f47545838686bc284286ec9bab2	4.96981	Latescibacteria	uncultured Acidobacterium sp.	uncultured Acidobacterium sp.	uncultured Acidobacterium sp.	uncultured Acidobacterium sp.	uncultured Acidobacterium sp.	0.00177778	RF1118	B4637_uncultured Acidobacterium sp.	Not differential
6431a405cf9cfaecba75ba4caf761b8f	4.09434	Elusimicrobia	Lineage IIa	#N/A	#N/A	#N/A	#N/A	0.00177381	RF1119	B10011_o_NA	Not differential
HM251352.1.1345	3.2581	Bacteroidetes	Bacteroidia	Flavobacteriales	Weeksellaceae	Chryseobacterium	#N/A	0.00177165	RF1120	B12183_Chryseobacterium	Not differential
EU202742.1.1421	6.59578	Acidobacteria	Acidobacteriia	Acidobacteriales	#N/A	#N/A	#N/A	0.00176936	RF1121	B781_o_Acidobacteriales	Non-fer
KC286873.1.1480	3.89182	Proteobacteria	Deltaproteobacteria	Bdellovibrionales	Bdellovibrionaceae	Bdellovibrio	metagenome	0.00176838	RF1122	B11024_Bdellovibrio	Not differential
5cf6f10328866790a07da65bb032ab0f	2.3979	Bacteroidetes	Ignavibacteria	OPB56	uncultured prokaryote	uncultured prokaryote	uncultured prokaryote	0.00176667	RF1123	B9685_uncultured prokaryote	Not differential
HM273849.1.1308	3.3322	Proteobacteria	Alphaproteobacteria	Rhizobiales	A0839	metagenome	metagenome	0.00176623	RF1124	B12841_metagenome	Fer
EF020206.1.1401	4.27667	Acidobacteria	Blastocatellia (Subgroup 4)	11-24	#N/A	#N/A	#N/A	0.00176471	RF1125	B2385_o_11-24	Fer
AY102345.1.1331	4.39445	Gemmatimonadetes	Gemmatimonadetes	Gemmatimonadales	Gemmatimonadaceae	uncultured	uncultured Nitrospira sp.	0.00176471	RF1126	B6597_uncultured	Non-fer
79f5c064d953f1f3c7c8634918d43f8f	5.71373	Planctomycetes	Planctomycetacia	Pirellulales	Pirellulaceae	uncultured	uncultured soil bacterium	0.00176471	RF1127	B2945_uncultured	Fer
25339c620548421675b559a37cf7bf86	3.58352	Bacteroidetes	Bacteroidia	Chitinophagales	Chitinophagaceae	uncultured	Terrimonas sp. 16-45A	0.00176471	RF1128	B8270_uncultured	Not differential
c6de10607010df805e786c8c7e36bdd5	2.56495	#N/A	#N/A	#N/A	#N/A	#N/A	#N/A	0.00176404	RF1129	B17259_o_NA	Not differential
b15c86db4c6bdff4aead7e4dcf22dc0a	1.60944	Verrucomicrobia	Verrucomicrobiae	S-BQ2-57 soil group	uncultured Verrucomicrobium sp.	uncultured Verrucomicrobium sp.	uncultured Verrucomicrobium sp.	0.0017619	RF1130	B20383_uncultured Verrucomicrobium sp.	Not differential
65d50a14fe15457c9cfed29b8f4e77ab	2.70805	Proteobacteria	Gammaproteobacteria	Gammaproteobacteria Incertae Sedis	Unknown Family	uncultured bacterium	uncultured bacterium	0.00176054	RF1131	B16584_uncultured bacterium	Not differential
dc4899213abf91006909f929301397f2	5.2933	Chloroflexi	Ktedonobacteria	C0119	uncultured bacterium	uncultured bacterium	uncultured bacterium	0.00176003	RF1132	B2042_uncultured bacterium	Fer
AJ518797.1.1339	5.52545	Proteobacteria	Deltaproteobacteria	Myxococcales	Archangiaceae	Anaeromyxobacter	#N/A	0.00175714	RF1133	B1474_Anaeromyxobacter	Fer
0f4dbe78649c6fac12cf06f953126877	2.63906	#N/A	#N/A	#N/A	#N/A	#N/A	#N/A	0.00175469	RF1134	B4477_o_NA	Not differential
LN562775.1.1390	2.77259	Proteobacteria	Deltaproteobacteria	Oligoflexales	0319-6G20	#N/A	#N/A	0.00175	RF1135	B12067_f_0319-6G20	Not differential
JN540185.1.1476	6.90475	Acidobacteria	Subgroup 6	#N/A	#N/A	#N/A	#N/A	0.00175	RF1136	B336_o_NA	Fer
EU662546.1.1491	4.54329	Nitrospirae	Thermodesulfovibrionia	uncultured	uncultured bacterium	uncultured bacterium	uncultured bacterium	0.00175	RF1137	B2924_uncultured bacterium	Fer
f360d6af2fbeba7ecd883851ff10b64b	2.56495	Elusimicrobia	Elusimicrobia	MVP-88	uncultured bacterium	uncultured bacterium	uncultured bacterium	0.00175	RF1138	B17313_uncultured bacterium	Not differential
6f4de15363c083786a3208068759f798	3.52636	Chloroflexi	Anaerolineae	SBR1031	anaerobic bacterium MO-CFX2	anaerobic bacterium MO-CFX2	anaerobic bacterium MO-CFX2	0.00175	RF1139	B7817_anaerobic bacterium MO-CFX2	Not differential
cb99f07c38d68aa34f56114a3afa64dc	3.71357	Verrucomicrobia	Verrucomicrobiae	Pedosphaerales	Pedosphaeraceae	SCGC AAA164-E04	Verrucomicrobia bacterium SCGC AAA164-N20	0.00175	RF1140	B11868_SCGC AAA164-E04	Fer
a4417831438736760f655bc4fa66827d	1.38629	Chloroflexi	Anaerolineae	uncultured	uncultured organism	uncultured organism	uncultured organism	0.00175	RF1141	B18614_uncultured organism	Not differential
4f9fb57ae15318ff0d7bc8d99278fd2a	5.21494	Actinobacteria	Coriobacteriia	OPB41	#N/A	#N/A	#N/A	0.00175	RF1142	B5391_o_OPB41	Fer
1206de5303fb345f913c7b68b35da5d0	1.94591	Chloroflexi	Anaerolineae	SBR1031	#N/A	#N/A	#N/A	0.00175	RF1143	B17088_o_SBR1031	Not differential
3ab18269d0f04ebb9fe7fd503bceca50	2.48491	Proteobacteria	Alphaproteobacteria	Rhodospirillales	uncultured	uncultured soil bacterium	uncultured soil bacterium	0.00174569	RF1144	B8082_uncultured soil bacterium	Not differential
DQ431004.1.1441	4.61512	Cyanobacteria	Oxyphotobacteria	Leptolyngbyales	Leptolyngbyaceae	JSC-12	cf. Leptolyngbya sp. Greenland_9	0.00174519	RF1145	B4275_JSC-12	Fer
JX133392.1.1515	5.56834	Proteobacteria	Deltaproteobacteria	Myxococcales	Archangiaceae	Anaeromyxobacter	uncultured proteobacterium	0.00174519	RF1146	B465_Anaeromyxobacter	Fer
JF119689.1.1303	8.10168	Proteobacteria	Alphaproteobacteria	Rhizobiales	Hyphomicrobiaceae	Hyphomicrobium	#N/A	0.00174519	RF1147	B381_Hyphomicrobium	Fer
3d548bb429caa12bf8e6f4dfe51f15b8	4.38203	Planctomycetes	Planctomycetacia	Pirellulales	Pirellulaceae	#N/A	#N/A	0.00174519	RF1148	B8658_f_Pirellulaceae	Non-fer
bd5a0ea811ab2be942ab9429c59df9a1	4.31749	Omnitrophicaeota	uncultured Banisveld landfill bacterium BVC56	uncultured Banisveld landfill bacterium BVC56	uncultured Banisveld landfill bacterium BVC56	uncultured Banisveld landfill bacterium BVC56	uncultured Banisveld landfill bacterium BVC56	0.00174519	RF1149	B2096_uncultured Banisveld landfill bacterium BVC56	Not differential
3f19d8ff0417bd424d228fa876486303	1.94591	Omnitrophicaeota	uncultured bacterium	uncultured bacterium	uncultured bacterium	uncultured bacterium	uncultured bacterium	0.0017363	RF1150	B14625_uncultured bacterium	Fer
AB696046.1.1490	4.41884	Firmicutes	Clostridia	Clostridiales	Peptococcaceae	Desulfosporosinus	#N/A	0.00173333	RF1151	B3985_Desulfosporosinus	Not differential
HG380587.1.1401	7.42714	Proteobacteria	Gammaproteobacteria	Betaproteobacteriales	Hydrogenophilaceae	Thiobacillus	#N/A	0.00173333	RF1152	B444_Thiobacillus	Fer
AB307638.1.1387	5.35186	Firmicutes	Clostridia	Clostridiales	Ruminococcaceae	Ruminiclostridium 1	#N/A	0.00173333	RF1153	B2213_Ruminiclostridium 1	Non-fer
FJ595545.1.1368	5.82305	Proteobacteria	Deltaproteobacteria	Myxococcales	Archangiaceae	#N/A	#N/A	0.00173333	RF1154	B1141_f_Archangiaceae	Not differential
EF515717.1.1353	5.92158	Chloroflexi	Anaerolineae	Anaerolineales	Anaerolineaceae	uncultured	#N/A	0.00173333	RF1155	B2132_uncultured	Fer
16b66dc4eaa242593c20d9ec0ecbc3a9	3.4012	Actinobacteria	Thermoleophilia	Gaiellales	uncultured	#N/A	#N/A	0.00173333	RF1156	B13318_f_uncultured	Not differential
EU133426.1.1266	4.04305	Proteobacteria	Alphaproteobacteria	Rhizobiales	Rhizobiales Incertae Sedis	Bauldia	uncultured Methylocystaceae bacterium	0.00173239	RF1157	B4678_Bauldia	Not differential
DQ138960.1.1519	5.0689	Nitrospirae	4-29-1	#N/A	#N/A	#N/A	#N/A	0.00173239	RF1158	B357_o_NA	Fer
JX122149.1.1213	2.30259	Actinobacteria	Actinobacteria	Corynebacteriales	Nocardiaceae	Nocardia	#N/A	0.00173214	RF1159	B18406_Nocardia	Non-fer
AB672113.1.1476	4.02535	Proteobacteria	Deltaproteobacteria	Desulfuromonadales	Geobacteraceae	Geobacter	uncultured soil bacterium	0.00172941	RF1160	B10367_Geobacter	Not differential
EF019437.1.1411	5.37064	Verrucomicrobia	Verrucomicrobiae	Chthoniobacterales	Chthoniobacteraceae	Candidatus Udaeobacter	uncultured soil bacterium	0.00172941	RF1161	B248_Candidatus Udaeobacter	Non-fer
FJ822630.1.1383	4.21951	Verrucomicrobia	Verrucomicrobiae	Chthoniobacterales	Chthoniobacteraceae	Chthoniobacter	#N/A	0.00172784	RF1162	B4995_Chthoniobacter	Not differential
9a122e67fb2e111dc9cfe3f56d11bf2c	1.38629	Patescibacteria	Parcubacteria	uncultured deep-sea bacterium	uncultured deep-sea bacterium	uncultured deep-sea bacterium	uncultured deep-sea bacterium	0.00172454	RF1163	B20938_uncultured deep-sea bacterium	Not differential
a418c4236b50a53f8440b35914094871	2.07944	WS1	uncultured bacterium	uncultured bacterium	uncultured bacterium	uncultured bacterium	uncultured bacterium	0.00172454	RF1164	B19013_uncultured bacterium	Not differential
7ee0a7540e4cb76e146b41bdaf41fd33	4.31749	Planctomycetes	Phycisphaerae	Tepidisphaerales	WD2101 soil group	#N/A	#N/A	0.00172308	RF1165	B2877_f_WD2101 soil group	Not differential
188eb148ac65629de520c931046d1813	2.30259	Proteobacteria	#N/A	#N/A	#N/A	#N/A	#N/A	0.00172308	RF1166	B17397_o_NA	Fer
LC168888.1.1497	3.95124	Proteobacteria	Deltaproteobacteria	Myxococcales	Phaselicystidaceae	Phaselicystis	uncultured prokaryote	0.00172024	RF1167	B5268_Phaselicystis	Non-fer
AB364744.1.1490	7.02997	Proteobacteria	Deltaproteobacteria	Syntrophobacterales	Syntrophaceae	uncultured	uncultured delta proteobacterium	0.00172024	RF1168	B560_uncultured	Fer
65230b9d55837907a8cf20814bffca4f	3.66356	Planctomycetes	Phycisphaerae	Pla1 lineage	uncultured bacterium	uncultured bacterium	uncultured bacterium	0.00172024	RF1169	B10538_uncultured bacterium	Not differential
FPLL01003559.1.1434	4.72739	Armatimonadetes	Fimbriimonadia	Fimbriimonadales	Fimbriimonadaceae	metagenome	metagenome	0.00171978	RF1170	B2900_metagenome	Fer
DQ450806.1.1322	6.84588	Nitrospirae	Thermodesulfovibrionia	uncultured	uncultured prokaryote	uncultured prokaryote	uncultured prokaryote	0.00171569	RF1171	B48_uncultured prokaryote	Fer
b350758854b79942fa3bd139d9872d04	5.40717	Bacteroidetes	Bacteroidia	Bacteroidales	Prolixibacteraceae	BSV13	uncultured Prolixibacter sp.	0.00171569	RF1172	B1645_BSV13	Non-fer
b0520fe0326028abbc747f3ded021f03	3.8712	Chloroflexi	Anaerolineae	#N/A	#N/A	#N/A	#N/A	0.00171569	RF1173	B5679_o_NA	Non-fer
bf8f5af884ee5056030a377bcebca959	5.33272	Chloroflexi	JG30-KF-CM66	#N/A	#N/A	#N/A	#N/A	0.00171569	RF1174	B1169_o_NA	Not differential
FJ232641.1.1338	4.07754	Planctomycetes	Planctomycetacia	Pirellulales	Pirellulaceae	uncultured	uncultured sludge bacterium A17	0.00171429	RF1175	B8594_uncultured	Fer
JF209322.1.1340	1.09861	Bacteroidetes	Bacteroidia	Cytophagales	Spirosomaceae	Spirosoma	Spirosoma sp. 5516J-17	0.00171429	RF1176	B15210_Spirosoma	Not differential
GQ500790.1.1506	3.52636	Proteobacteria	Gammaproteobacteria	Betaproteobacteriales	Methylophilaceae	#N/A	#N/A	0.00171429	RF1177	B7224_f_Methylophilaceae	Not differential
JF429007.1.1517	4.40672	Chloroflexi	Ktedonobacteria	C0119	uncultured bacterium	uncultured bacterium	uncultured bacterium	0.00171429	RF1178	B3932_uncultured bacterium	Non-fer
KJ192051.1.1453	3.43399	Cyanobacteria	Oxyphotobacteria	Leptolyngbyales	Leptolyngbyaceae	JSC-12	uncultured Oscillatoriales cyanobacterium	0.00171429	RF1179	B5959_JSC-12	Non-fer
KF770966.1.1366	1.79176	Cyanobacteria	Oxyphotobacteria	Phormidesmiales	Nodosilineaceae	Nodosilinea PCC-7104	#N/A	0.00171429	RF1180	B20069_Nodosilinea PCC-7104	Not differential
FPLS01006514.7.1498	1.09861	Proteobacteria	Deltaproteobacteria	Myxococcales	Archangiaceae	Anaeromyxobacter	metagenome	0.00171429	RF1181	B16176_Anaeromyxobacter	Not differential
JN397734.1.1444	3.78419	Elusimicrobia	Endomicrobia	Endomicrobiales	Endomicrobiaceae	Candidatus Endomicrobium	uncultured bacterium	0.00171429	RF1182	B5750_Candidatus Endomicrobium	Not differential
5b85271194671e860bfb036e2366fc9a	3.55535	Bacteroidetes	Bacteroidia	Cytophagales	Microscillaceae	#N/A	#N/A	0.00171429	RF1183	B3007_f_Microscillaceae	Fer
a98aaaa37992792a01263b14dd5624b3	2.30259	Chloroflexi	Anaerolineae	SBR1031	#N/A	#N/A	#N/A	0.00171429	RF1184	B2749_o_SBR1031	Not differential
89fb9fc9430fb8b96b86adc82edaab89	5.18739	Firmicutes	Clostridia	Clostridiales	Heliobacteriaceae	Hydrogenispora	uncultured Firmicutes bacterium	0.00171429	RF1185	B1820_Hydrogenispora	Non-fer
676c50cfbe218f201caea989ff7e6b37	0.693147	Chlamydiae	Chlamydiae	Chlamydiales	Parachlamydiaceae	#N/A	#N/A	0.00171429	RF1186	B22126_f_Parachlamydiaceae	Not differential
fe51b80515188109609caf1d085ec15e	0.693147	Planctomycetes	Phycisphaerae	Phycisphaerales	Phycisphaeraceae	SM1A02	uncultured soil bacterium	0.00171429	RF1187	B22563_SM1A02	Not differential
b9349b6207a58e5c518e8858d8f060d4	3.13549	Spirochaetes	Spirochaetia	Spirochaetales	Spirochaetaceae	Spirochaeta 2	#N/A	0.00171429	RF1188	B6299_Spirochaeta 2	Not differential
ad8dfa80aba77982a8426e883ce83ea0	2.56495	Chloroflexi	Chloroflexia	Chloroflexales	Herpetosiphonaceae	Herpetosiphon	uncultured Chloroflexi bacterium	0.00171429	RF1189	B17225_Herpetosiphon	Not differential
1a467e9e97f55c5d8641cccace6d2632	3.29584	Planctomycetes	Planctomycetacia	Isosphaerales	Isosphaeraceae	uncultured	Isosphaera sp. Io3-6	0.00171429	RF1190	B8821_uncultured	Non-fer
AB672212.1.1423	7.27309	Chloroflexi	Anaerolineae	Anaerolineales	Anaerolineaceae	Anaerolinea	#N/A	0.00171429	RF1191	B271_Anaerolinea	Non-fer
07b2b05ede0fff61a4ddfcf575103ba4	5.2575	Verrucomicrobia	Verrucomicrobiae	Pedosphaerales	Pedosphaeraceae	#N/A	#N/A	0.00171385	RF1192	B3001_f_Pedosphaeraceae	Not differential
318169a257781615867c5caeee7db0fe	2.07944	Dependentiae	Babeliae	Babeliales	Babeliaceae	Candidatus Babela	Candidatus Babela massiliensis	0.00171282	RF1193	B18892_Candidatus Babela	Not differential
EU669606.1.1492	6.33505	Proteobacteria	Gammaproteobacteria	Betaproteobacteriales	Burkholderiaceae	#N/A	#N/A	0.00170977	RF1194	B1658_f_Burkholderiaceae	Fer
AY214200.1.1504	3.78419	Chloroflexi	Anaerolineae	ADurb.Bin180	#N/A	#N/A	#N/A	0.00170897	RF1195	B7100_o_ADurb.Bin180	Fer
KM410824.1.1460	5.7589	Proteobacteria	Deltaproteobacteria	Syntrophobacterales	Syntrophaceae	Desulfobacca	uncultured prokaryote	0.00170788	RF1196	B354_Desulfobacca	Non-fer
82e9806efba80d3c647aa4ccab607f87	4.38203	Planctomycetes	Planctomycetacia	Gemmatales	Gemmataceae	uncultured	uncultured bacterium	0.00170556	RF1197	B7127_uncultured	Not differential
a08f591220b9459d6b3caa93cde13d9c	4.41884	Planctomycetes	Phycisphaerae	MSBL9	SG8-4	uncultured deep-sea bacterium	uncultured deep-sea bacterium	0.00169825	RF1198	B968_uncultured deep-sea bacterium	Non-fer
c86ea622dd98300ccbe4ba36dcf3dbff	3.17805	#N/A	#N/A	#N/A	#N/A	#N/A	#N/A	0.00169374	RF1199	B14514_o_NA	Not differential
LC124570.1.1467	5.35659	Proteobacteria	Gammaproteobacteria	Betaproteobacteriales	SC-I-84	#N/A	#N/A	0.00169231	RF1200	B1210_f_SC-I-84	Non-fer
AM935724.1.1304	4.68213	Chloroflexi	JG30-KF-CM66	metagenome	metagenome	metagenome	metagenome	0.00169231	RF1201	B1172_metagenome	Fer
AB364731.1.1489	6.43615	Proteobacteria	Deltaproteobacteria	Syntrophobacterales	Syntrophaceae	Smithella	#N/A	0.00169231	RF1202	B1692_Smithella	Non-fer
KM030577.1.1458	3.4012	Bacteroidetes	Bacteroidia	Sphingobacteriales	Sphingobacteriaceae	Mucilaginibacter	Mucilaginibacter ginsengisoli	0.00169231	RF1203	B12591_Mucilaginibacter	Fer
FJ625330.1.1437	5.32788	Proteobacteria	Alphaproteobacteria	Elsterales	URHD0088	#N/A	#N/A	0.00169231	RF1204	B1827_f_URHD0088	Not differential
EF516537.1.1481	3.61092	Acidobacteria	Holophagae	Subgroup 7	#N/A	#N/A	#N/A	0.00169231	RF1205	B12414_o_Subgroup 7	Not differential
AB753960.1.1444	3.3322	Bacteroidetes	Bacteroidia	Sphingobacteriales	env.OPS 17	uncultured Sphingobacteriales bacterium	uncultured Sphingobacteriales bacterium	0.00169231	RF1206	B2146_uncultured Sphingobacteriales bacterium	Not differential
KC424688.1.1488	2.3979	Patescibacteria	Gracilibacteria	uncultured soil bacterium	uncultured soil bacterium	uncultured soil bacterium	uncultured soil bacterium	0.00169231	RF1207	B6312_uncultured soil bacterium	Not differential
45f9a36e7f78017e03c052c6bf8d8f27	2.70805	Bacteroidetes	Ignavibacteria	Kryptoniales	MSB-3C8	uncultured Chloroflexi bacterium	uncultured Chloroflexi bacterium	0.00169231	RF1208	B5965_uncultured Chloroflexi bacterium	Fer
e4f86faf9694b3b6034e6097127c34a6	5.56068	Acidobacteria	Acidobacteriia	Solibacterales	Solibacteraceae (Subgroup 3)	GOUTB8	uncultured bacterium	0.00169231	RF1209	B946_GOUTB8	Fer
ce978cdb3b9b2fcc76e8c9f4496a5481	1.94591	Proteobacteria	Deltaproteobacteria	Oligoflexales	Oligoflexaceae	uncultured	uncultured soil bacterium	0.00169231	RF1210	B17966_uncultured	Not differential
5c57297e3add67979357a6d38173bd61	0.693147	Patescibacteria	Berkelbacteria	uncultured soil bacterium	uncultured soil bacterium	uncultured soil bacterium	uncultured soil bacterium	0.00169231	RF1211	B17828_uncultured soil bacterium	Not differential
e5f70ab129c6b0e6881676a00c0e83d9	1.79176	Bacteroidetes	Bacteroidia	Sphingobacteriales	Sphingobacteriaceae	#N/A	#N/A	0.00169231	RF1212	B19974_f_Sphingobacteriaceae	Not differential
6c20562c84105194ce7235d19725c4ef	4.8828	Verrucomicrobia	Verrucomicrobiae	Chthoniobacterales	Chthoniobacteraceae	#N/A	#N/A	0.00169121	RF1213	B6030_f_Chthoniobacteraceae	Not differential
56012dfa1137502b4a716400a35df702	5.7589	Chloroflexi	Anaerolineae	Anaerolineales	Anaerolineaceae	uncultured	uncultured prokaryote	0.00168889	RF1214	B1013_uncultured	Non-fer
JN391772.1.1523	4.59512	Firmicutes	Negativicutes	Selenomonadales	Acidaminococcaceae	uncultured	uncultured bacterium	0.0016875	RF1215	B5771_uncultured	Not differential
4c7bcbe4ac68bc8750a9beaa6d6a75d0	5.76519	Proteobacteria	Deltaproteobacteria	Myxococcales	Sandaracinaceae	uncultured	#N/A	0.0016875	RF1216	B1591_uncultured	Not differential
5c076ec52dfe2b1f2b5c14669e867273	2.77259	Planctomycetes	Planctomycetacia	Isosphaerales	Isosphaeraceae	Singulisphaera	#N/A	0.00168435	RF1217	B2184_Singulisphaera	Not differential
JX079225.1.1547	7.50053	Proteobacteria	Deltaproteobacteria	Myxococcales	Archangiaceae	Anaeromyxobacter	uncultured Anaeromyxobacter sp.	0.00168056	RF1218	B259_Anaeromyxobacter	Not differential
AM403313.1.1279	5.61677	Bacteroidetes	Bacteroidia	Sphingobacteriales	KD3-93	uncultured Bacteroidetes bacterium	uncultured Bacteroidetes bacterium	0.00168056	RF1219	B2286_uncultured Bacteroidetes bacterium	Not differential
5a7cb00f284ca934aa324e74ad54243a	2.89037	#N/A	#N/A	#N/A	#N/A	#N/A	#N/A	0.00168056	RF1220	B9925_o_NA	Not differential
7c0d07ddb91531887ceb203ddb277a0d	4.5326	Proteobacteria	Deltaproteobacteria	Myxococcales	Blfdi19	uncultured Cystobacterineae bacterium	uncultured Cystobacterineae bacterium	0.00168056	RF1221	B4717_uncultured Cystobacterineae bacterium	Not differential
AB930678.1.1461	6.12249	Bacteroidetes	Ignavibacteria	Kryptoniales	BSV26	uncultured Chlorobi bacterium	uncultured Chlorobi bacterium	0.00167857	RF1222	B569_uncultured Chlorobi bacterium	Fer
bb043304dfc205d559c2165f7f1c227f	1.94591	Elusimicrobia	Endomicrobia	Endomicrobiales	Endomicrobiaceae	Candidatus Endomicrobium	metagenome	0.00167279	RF1223	B19436_Candidatus Endomicrobium	Fer
b2716ffdd925448630040a3153e9237a	4.23411	Chloroflexi	Anaerolineae	SBR1031	uncultured Gemmatimonadetes bacterium	uncultured Gemmatimonadetes bacterium	uncultured Gemmatimonadetes bacterium	0.00167161	RF1224	B7598_uncultured Gemmatimonadetes bacterium	Not differential
JQ425875.1.1486	2.07944	Proteobacteria	Deltaproteobacteria	Myxococcales	27F-1492R	uncultured bacterium	uncultured bacterium	0.00167045	RF1225	B12060_uncultured bacterium	Not differential
FPLS01021807.22.1287	5.66643	Proteobacteria	Gammaproteobacteria	Betaproteobacteriales	Burkholderiaceae	#N/A	#N/A	0.00166776	RF1226	B1732_f_Burkholderiaceae	Not differential
a421cbf27bf3b68b9654ee5eb9dd7a55	5.81413	Proteobacteria	Deltaproteobacteria	Myxococcales	BIrii41	#N/A	#N/A	0.00166776	RF1227	B707_f_BIrii41	Not differential
LC124754.1.1449	4.06044	Armatimonadetes	uncultured	#N/A	#N/A	#N/A	#N/A	0.00166667	RF1228	B6048_o_NA	Non-fer
JF145371.1.1374	4.59512	Proteobacteria	Deltaproteobacteria	Myxococcales	mle1-27	#N/A	#N/A	0.00166667	RF1229	B2418_f_mle1-27	Not differential
AM490653.1.1511	4.34381	Proteobacteria	Deltaproteobacteria	Syntrophobacterales	Syntrophaceae	Desulfomonile	#N/A	0.00166667	RF1230	B2797_Desulfomonile	Fer
HM269045.1.1325	5.79606	Firmicutes	Clostridia	Clostridiales	Clostridiaceae 1	#N/A	#N/A	0.00166667	RF1231	B3745_f_Clostridiaceae 1	Non-fer
2b6573ac7142f8dc7a9ceb38a17097b9	1.79176	WPS-2	metagenome	metagenome	metagenome	metagenome	metagenome	0.00166667	RF1232	B19670_metagenome	Not differential
3cde3748fa7430bc370075341753197c	2.56495	Cyanobacteria	Sericytochromatia	Cyanobacteria/Melainabacteria group bacterium S15B-MN24 CBMW_12	Cyanobacteria/Melainabacteria group bacterium S15B-MN24 CBMW_12	Cyanobacteria/Melainabacteria group bacterium S15B-MN24 CBMW_12	Cyanobacteria/Melainabacteria group bacterium S15B-MN24 CBMW_12	0.00166667	RF1233	B11804_Cyanobacteria/Melainabacteria group bacterium S15B-MN24 CBMW_12	Not differential
1e80062d3881a15f49e5040b84f3b5fb	4.86753	Gemmatimonadetes	Gemmatimonadetes	Gemmatimonadales	Gemmatimonadaceae	Gemmatimonas	Gemmatimonas phototrophica	0.00166667	RF1234	B5568_Gemmatimonas	Not differential
0b22e380d59ca9e066bdc9388ff3536f	4.26268	Chloroflexi	Anaerolineae	SBR1031	metagenome	metagenome	metagenome	0.00166667	RF1235	B2961_metagenome	Non-fer
55b328efc5614b0897b5eb9b29fe70ca	6.10925	Chloroflexi	Anaerolineae	Anaerolineales	Anaerolineaceae	uncultured	#N/A	0.00166667	RF1236	B2263_uncultured	Fer
EF688191.1.1513	5.63479	Acidobacteria	Aminicenantia	Aminicenantales	uncultured microorganism	uncultured microorganism	uncultured microorganism	0.00166667	RF1237	B2124_uncultured microorganism	Not differential
bb91583cfad10072eefca45cd84d8887	3.85015	Proteobacteria	Deltaproteobacteria	Myxococcales	KD3-10	uncultured delta proteobacterium	uncultured delta proteobacterium	0.00166667	RF1238	B8010_uncultured delta proteobacterium	Fer
DQ185242.1.1394	2.30259	Cyanobacteria	Oxyphotobacteria	Nostocales	Nostocaceae	Nostoc PCC-7524	#N/A	0.00166494	RF1239	B18326_Nostoc PCC-7524	Fer
HQ330554.1.1418	6.03309	Proteobacteria	Deltaproteobacteria	Syntrophobacterales	Syntrophaceae	uncultured	uncultured delta proteobacterium	0.00165303	RF1240	B1623_uncultured	Not differential
FJ946615.1.1290	7.40489	Firmicutes	Clostridia	Clostridiales	Clostridiaceae 1	Clostridium sensu stricto 13	#N/A	0.00165	RF1241	B849_Clostridium sensu stricto 13	Not differential
DQ346495.1.1523	4.44265	Firmicutes	Bacilli	Bacillales	Bacillaceae	Bacillus	Bacillus sp. 24-3	0.00164854	RF1242	B8394_Bacillus	Fer
GU208435.1.1464	4.26268	Proteobacteria	Deltaproteobacteria	Sva0485	#N/A	#N/A	#N/A	0.00163968	RF1243	B3266_o_Sva0485	Fer
47210df3cff8328c2a18fa49ea18ccdc	1.38629	Proteobacteria	Deltaproteobacteria	Desulfuromonadales	#N/A	#N/A	#N/A	0.00163725	RF1244	B20745_o_Desulfuromonadales	Not differential
EF516971.1.1477	5.39363	Acidobacteria	Thermoanaerobaculia	Thermoanaerobaculales	Thermoanaerobaculaceae	Subgroup 10	#N/A	0.00163636	RF1245	B674_Subgroup 10	Not differential
FOJI01000044.2.1538	3.66356	Firmicutes	Clostridia	Clostridiales	Lachnospiraceae	Lachnoclostridium	[Clostridium] fimetarium	0.00163636	RF1246	B8456_Lachnoclostridium	Not differential
LC124788.1.1452	4.66344	Planctomycetes	Planctomycetacia	Pirellulales	Pirellulaceae	uncultured	uncultured bacterium	0.00163636	RF1247	B2112_uncultured	Not differential
HG423553.1.1283	7.70256	Proteobacteria	Alphaproteobacteria	Caulobacterales	Caulobacteraceae	Caulobacter	#N/A	0.00163636	RF1248	B420_Caulobacter	Not differential
JF169102.1.1345	6.06146	Firmicutes	Clostridia	Clostridiales	Ruminococcaceae	#N/A	#N/A	0.00163636	RF1249	B2503_f_Ruminococcaceae	Fer
JN868915.1.1530	2.48491	Proteobacteria	Gammaproteobacteria	CCM19a	#N/A	#N/A	#N/A	0.00163636	RF1250	B14570_o_CCM19a	Not differential
1941541836f030ce305c26ce6d6f7376	4.07754	Proteobacteria	Deltaproteobacteria	Bdellovibrionales	Bdellovibrionaceae	Bdellovibrio	#N/A	0.00163636	RF1251	B10088_Bdellovibrio	Not differential
38ed22fb953eda32104e24f541732674	1.94591	Chloroflexi	Anaerolineae	SBR1031	uncultured Chlorobi bacterium	uncultured Chlorobi bacterium	uncultured Chlorobi bacterium	0.00163636	RF1252	B13669_uncultured Chlorobi bacterium	Not differential
KC554898.1.1512	6.99668	Actinobacteria	Thermoleophilia	Gaiellales	uncultured	#N/A	#N/A	0.00163333	RF1253	B451_f_uncultured	Not differential
GU208382.1.1440	5.69373	Bacteroidetes	Bacteroidia	Chitinophagales	Chitinophagaceae	Dinghuibacter	#N/A	0.00163333	RF1254	B1070_Dinghuibacter	Not differential
c9f9fb364a209e983b4eaa40d27a3094	1.09861	Patescibacteria	Berkelbacteria	Candidatus Berkelbacteria bacterium RIFOXYA2_FULL_43_10	Candidatus Berkelbacteria bacterium RIFOXYA2_FULL_43_10	Candidatus Berkelbacteria bacterium RIFOXYA2_FULL_43_10	Candidatus Berkelbacteria bacterium RIFOXYA2_FULL_43_10	0.00163333	RF1255	B21679_Candidatus Berkelbacteria bacterium RIFOXYA2_FULL_43_10	Not differential
7e7edff504057fd18b4c0212dbb1240d	2.70805	Proteobacteria	#N/A	#N/A	#N/A	#N/A	#N/A	0.00163333	RF1256	B16610_o_NA	Not differential
285a090f30fca65b4b5ee242b4b3ddc1	3.52636	Planctomycetes	Planctomycetacia	Gemmatales	Gemmataceae	uncultured	uncultured bacterium	0.00163333	RF1257	B5592_uncultured	Not differential
fdef0e7cc4ce163c403a4d890e5f772c	2.63906	Patescibacteria	CPR2	uncultured bacterium	uncultured bacterium	uncultured bacterium	uncultured bacterium	0.00163333	RF1258	B13600_uncultured bacterium	Not differential
130377e94fc299cf8555cfbda7627519	4.30407	Chloroflexi	Chloroflexia	Thermomicrobiales	JG30-KF-CM45	uncultured soil bacterium	uncultured soil bacterium	0.00163333	RF1259	B4044_uncultured soil bacterium	Not differential
7dc0e0c6c06f2ea37cd9f2c6d4e97d4f	2.3979	Rokubacteria	NC10	Methylomirabilales	Methylomirabilaceae	Sh765B-TzT-35	candidate division NC10 bacterium RIFCSPLOWO2_02_FULL_66_22	0.00163274	RF1260	B1107_Sh765B-TzT-35	Not differential
JX223525.1.1474	6.59167	Bacteroidetes	Bacteroidia	Flavobacteriales	Flavobacteriaceae	Flavobacterium	#N/A	0.001625	RF1261	B1646_Flavobacterium	Fer
e3a11bfd9c6892eb6bd810bf68fe3cb8	4.90527	Proteobacteria	Deltaproteobacteria	Myxococcales	Blfdi19	metagenome	metagenome	0.00162454	RF1262	B2217_metagenome	Non-fer
b390f36e11adf1aa96a004a7cbe57c17	2.19722	Planctomycetes	Phycisphaerae	mle1-8	#N/A	#N/A	#N/A	0.00162406	RF1263	B9292_o_mle1-8	Not differential
HE974849.1.1525	6.86066	Proteobacteria	Deltaproteobacteria	Syntrophobacterales	Syntrophaceae	uncultured	uncultured delta proteobacterium	0.00161472	RF1264	B66_uncultured	Fer
fa2310d90923838253ca80890bc3df38	1.79176	Fibrobacteres	Fibrobacteria	Fibrobacterales	#N/A	#N/A	#N/A	0.00161429	RF1265	B18365_o_Fibrobacterales	Not differential
ee0ec4308f868a923de0db6de675213e	2.63906	Bacteroidetes	Ignavibacteria	OPB56	uncultured prokaryote	uncultured prokaryote	uncultured prokaryote	0.00160879	RF1266	B9228_uncultured prokaryote	Not differential
AJ519665.1.1295	7.14756	Acidobacteria	Holophagae	Holophagales	Holophagaceae	#N/A	#N/A	0.00160556	RF1267	B487_f_Holophagaceae	Fer
7c77f2ef11d89677f55afffe1828756e	2.77259	Zixibacteria	uncultured bacterium	uncultured bacterium	uncultured bacterium	uncultured bacterium	uncultured bacterium	0.00160556	RF1268	B16301_uncultured bacterium	Not differential
08762726ebfd2f0b895d651db41532cf	1.38629	#N/A	#N/A	#N/A	#N/A	#N/A	#N/A	0.00160556	RF1269	B20617_o_NA	Not differential
JQ462975.1.1343	3.97029	Patescibacteria	Microgenomatia	Candidatus Woesebacteria	uncultured bacterium	uncultured bacterium	uncultured bacterium	0.00160226	RF1270	B5695_uncultured bacterium	Not differential
AB630472.1.1501	5.0814	Proteobacteria	Deltaproteobacteria	Syntrophobacterales	Syntrophaceae	Desulfobacca	#N/A	0.0016	RF1271	B2377_Desulfobacca	Non-fer
KC990431.1.1389	0.693147	Patescibacteria	Microgenomatia	Candidatus Curtissbacteria	uncultured Microgenomates group bacterium	uncultured Microgenomates group bacterium	uncultured Microgenomates group bacterium	0.0016	RF1272	B19599_uncultured Microgenomates group bacterium	Not differential
HM298855.1.1353	4.21951	Planctomycetes	Planctomycetacia	Isosphaerales	Isosphaeraceae	uncultured	#N/A	0.0016	RF1273	B4224_uncultured	Not differential
FPLM01001439.7.1479	2.89037	Planctomycetes	Planctomycetacia	Gemmatales	Gemmataceae	Fimbriiglobus	metagenome	0.0016	RF1274	B15919_Fimbriiglobus	Fer
EU132860.1.1269	4.40672	Actinobacteria	Acidimicrobiia	Microtrichales	Ilumatobacteraceae	uncultured	uncultured bacterium	0.0016	RF1275	B4227_uncultured	Not differential
FPLS01029787.11.1481	3.98898	Proteobacteria	Alphaproteobacteria	Acetobacterales	Acetobacteraceae	Rhodovastum	metagenome	0.0016	RF1276	B5541_Rhodovastum	Not differential
28fff48945c6b5cc482d71faea234dec	1.60944	Gemmatimonadetes	Longimicrobia	Longimicrobiales	Longimicrobiaceae	uncultured compost bacterium	uncultured compost bacterium	0.0016	RF1277	B20159_uncultured compost bacterium	Not differential
fbffaea15181955c8e13dbf16329d71f	1.38629	Kiritimatiellaeota	Kiritimatiellae	WCHB1-41	#N/A	#N/A	#N/A	0.0016	RF1278	B6492_o_WCHB1-41	Not differential
EU808765.1.1338	5.53339	Proteobacteria	Gammaproteobacteria	Methylococcales	Methylomonaceae	Methylomonas	#N/A	0.0016	RF1279	B1469_Methylomonas	Non-fer
0f1a4c61cbc83f5d7cb52bfc605c9031	2.07944	#N/A	#N/A	#N/A	#N/A	#N/A	#N/A	0.0016	RF1280	B11136_o_NA	Not differential
849997a0324d1f84d2a51c403c6b735d	4.89784	Chloroflexi	Anaerolineae	SBR1031	anaerobic bacterium MO-CFX2	anaerobic bacterium MO-CFX2	anaerobic bacterium MO-CFX2	0.00159597	RF1281	B1667_anaerobic bacterium MO-CFX2	Fer
9afa295a171fd1850aa79a79106d9120	2.30259	Bacteroidetes	Bacteroidia	Cytophagales	Cytophagaceae	Sporocytophaga	#N/A	0.00159524	RF1282	B16323_Sporocytophaga	Not differential
AB240329.1.1447	3.80666	Proteobacteria	Alphaproteobacteria	Rhizobiales	Xanthobacteraceae	uncultured	#N/A	0.00159418	RF1283	B11399_uncultured	Not differential
GU179759.1.1383	4.02535	Dependentiae	Babeliae	Babeliales	Vermiphilaceae	uncultured Candidatus Dependentiae bacterium	uncultured Candidatus Dependentiae bacterium	0.00158514	RF1284	B10402_uncultured Candidatus Dependentiae bacterium	Not differential
EF019059.1.1381	4.43082	Verrucomicrobia	Verrucomicrobiae	Chthoniobacterales	Chthoniobacteraceae	Candidatus Udaeobacter	#N/A	0.00158514	RF1285	B2334_Candidatus Udaeobacter	Not differential
EF111208.1.1261	2.77259	Patescibacteria	Saccharimonadia	Saccharimonadales	metagenome	metagenome	metagenome	0.00158514	RF1286	B15415_metagenome	Not differential
f228bd5fe5c8f32bb017421f7d35dccc	4.23411	Actinobacteria	Coriobacteriia	FS118-23B-02	uncultured bacterium	uncultured bacterium	uncultured bacterium	0.00158514	RF1287	B6385_uncultured bacterium	Not differential
d43be81eb07a03ec42ea4218174f6a69	3.09104	Chloroflexi	Anaerolineae	RBG-13-54-9	uncultured Caldilineaceae bacterium	uncultured Caldilineaceae bacterium	uncultured Caldilineaceae bacterium	0.00158514	RF1288	B5260_uncultured Caldilineaceae bacterium	Not differential
DQ138961.1.1482	7.06817	Nitrospirae	Thermodesulfovibrionia	uncultured	uncultured prokaryote	uncultured prokaryote	uncultured prokaryote	0.00157895	RF1289	B305_uncultured prokaryote	Fer
KF275156.1.1480	4.84419	Firmicutes	Negativicutes	Selenomonadales	Veillonellaceae	Pelosinus	#N/A	0.00157895	RF1290	B5313_Pelosinus	Fer
a8d7c7f3ceed107d617a875d5674f94b	6.09357	Chloroflexi	Anaerolineae	RBG-13-54-9	#N/A	#N/A	#N/A	0.00157895	RF1291	B431_o_RBG-13-54-9	Non-fer
f1ad3820683d59bf736fa607a1ff7d84	5.50533	Chloroflexi	Anaerolineae	SBR1031	uncultured bacterium	uncultured bacterium	uncultured bacterium	0.00157895	RF1292	B724_uncultured bacterium	Not differential
2e33e3f53d3dd90ee333cbbb84006bba	5.3799	Verrucomicrobia	Verrucomicrobiae	Pedosphaerales	Pedosphaeraceae	#N/A	#N/A	0.00157895	RF1293	B1370_f_Pedosphaeraceae	Not differential
4fe50bce742ebe18af47885bcfbf20c4	5.6058	Latescibacteria	uncultured soil bacterium PRR-12	uncultured soil bacterium PRR-12	uncultured soil bacterium PRR-12	uncultured soil bacterium PRR-12	uncultured soil bacterium PRR-12	0.00157895	RF1294	B2188_uncultured soil bacterium PRR-12	Not differential
EU335156.1.1458	3.13549	Proteobacteria	Alphaproteobacteria	Reyranellales	Reyranellaceae	uncultured	metagenome	0.00157792	RF1295	B10395_uncultured	Fer
7755a845b14c38ea8f31eaf5e1fb23be	4.31749	Gemmatimonadetes	S0134 terrestrial group	uncultured soil bacterium	uncultured soil bacterium	uncultured soil bacterium	uncultured soil bacterium	0.00157721	RF1296	B1371_uncultured soil bacterium	Not differential
HQ597257.1.1507	3.98898	Acidobacteria	Blastocatellia (Subgroup 4)	DS-100	uncultured Acidobacteria bacterium	uncultured Acidobacteria bacterium	uncultured Acidobacteria bacterium	0.0015652	RF1297	B1712_uncultured Acidobacteria bacterium	Not differential
FR667461.1.1428	5.04343	Proteobacteria	Deltaproteobacteria	NB1-j	#N/A	#N/A	#N/A	0.0015625	RF1298	B3365_o_NB1-j	Not differential
JF920382.1.1326	3.52636	Cyanobacteria	Sericytochromatia	unidentified	unidentified	unidentified	unidentified	0.0015625	RF1299	B4350_unidentified	Not differential
2729061b74ddd921145790cece1b65aa	4.82831	Bacteroidetes	Bacteroidia	Sphingobacteriales	env.OPS 17	#N/A	#N/A	0.0015625	RF1300	B1778_f_env.OPS 17	Not differential
d62c8a0e4118d8ffe87db04b13c45c68	3.43399	Firmicutes	Clostridia	Clostridiales	#N/A	#N/A	#N/A	0.0015625	RF1301	B13240_o_Clostridiales	Not differential
1897b3b19a201d89b054e5232cd565d7	0.693147	#N/A	#N/A	#N/A	#N/A	#N/A	#N/A	0.0015625	RF1302	B21938_o_NA	Not differential
b1ee45749261aa58b6199fcabda70975	3.61092	Chloroflexi	Anaerolineae	RBG-13-54-9	uncultured bacterium UASB_TL14	uncultured bacterium UASB_TL14	uncultured bacterium UASB_TL14	0.0015625	RF1303	B9291_uncultured bacterium UASB_TL14	Fer
285e95b82fd04bc3364d4459a3ae1fbb	2.94444	Proteobacteria	Gammaproteobacteria	Methylococcales	Methylococcaceae	#N/A	#N/A	0.0015625	RF1304	B15509_f_Methylococcaceae	Fer
1d491ea08afdc61da5dfcaf19c341f28	4.04305	Verrucomicrobia	Verrucomicrobiae	S-BQ2-57 soil group	uncultured bacterium	uncultured bacterium	uncultured bacterium	0.0015625	RF1305	B2399_uncultured bacterium	Fer
HQ598464.1.1454	6.22456	Acidobacteria	Acidobacteriia	Acidobacteriales	Acidobacteriaceae (Subgroup 1)	#N/A	#N/A	0.00155556	RF1306	B490_f_Acidobacteriaceae (Subgroup 1)	Fer
HQ343222.1.1503	4.30407	Proteobacteria	Deltaproteobacteria	Myxococcales	Haliangiaceae	Haliangium	uncultured sludge bacterium A9	0.00155556	RF1307	B9054_Haliangium	Non-fer
b0787ed7880da04d5308f7585865b63c	3.29584	Proteobacteria	Deltaproteobacteria	Bdellovibrionales	Bdellovibrionaceae	Bdellovibrio	uncultured bacterium	0.00155556	RF1308	B13946_Bdellovibrio	Not differential
EU589264.1.1472	5.45104	Acidobacteria	Acidobacteriia	Solibacterales	Solibacteraceae (Subgroup 3)	AKIW659	uncultured soil bacterium	0.00153725	RF1309	B755_AKIW659	Not differential
HM921139.1.1346	5.23111	Proteobacteria	Deltaproteobacteria	Myxococcales	KD3-10	uncultured delta proteobacterium	uncultured delta proteobacterium	0.00153725	RF1310	B2177_uncultured delta proteobacterium	Fer
AB486789.1.1355	4.27667	Nitrospirae	Thermodesulfovibrionia	uncultured	uncultured prokaryote	uncultured prokaryote	uncultured prokaryote	0.00153725	RF1311	B3791_uncultured prokaryote	Not differential
KP687205.1.1438	4.40672	Bacteroidetes	Bacteroidia	Flavobacteriales	Flavobacteriaceae	Flavobacterium	#N/A	0.00153725	RF1312	B8609_Flavobacterium	Fer
JQ433969.1.1387	3.52636	Firmicutes	Clostridia	Clostridiales	Peptococcaceae	Desulfosporosinus	#N/A	0.00153725	RF1313	B3171_Desulfosporosinus	Not differential
EU399679.1.1489	4.02535	Proteobacteria	Deltaproteobacteria	Deltaproteobacteria Incertae Sedis	Syntrophorhabdaceae	Syntrophorhabdus	#N/A	0.00153725	RF1314	B2113_Syntrophorhabdus	Not differential
737d656d660000a53498d1da84b36ce8	4.11087	Acidobacteria	Subgroup 22	uncultured bacterium	uncultured bacterium	uncultured bacterium	uncultured bacterium	0.00153725	RF1315	B2258_uncultured bacterium	Not differential
05eed3720a4a56bfb0afa93ac9a9630a	3.7612	Verrucomicrobia	Verrucomicrobiae	S-BQ2-57 soil group	uncultured bacterium	uncultured bacterium	uncultured bacterium	0.00153274	RF1316	B3955_uncultured bacterium	Fer
05d52f5cfd124c8e88e57a05af41b25c	1.60944	Patescibacteria	ABY1	Candidatus Magasanikbacteria	uncultured bacterium	uncultured bacterium	uncultured bacterium	0.0015265	RF1317	B14595_uncultured bacterium	Not differential
JX222588.1.1237	6.51767	Proteobacteria	Deltaproteobacteria	Desulfuromonadales	Geobacteraceae	Geobacter	#N/A	0.00152521	RF1318	B1546_Geobacter	Not differential
JX505254.1.1469	2.30259	Proteobacteria	Deltaproteobacteria	Myxococcales	P3OB-42	uncultured Stigmatella sp.	uncultured Stigmatella sp.	0.00152521	RF1319	B3097_uncultured Stigmatella sp.	Not differential
DQ450729.1.1352	4.8828	Chloroflexi	TK10	#N/A	#N/A	#N/A	#N/A	0.00152521	RF1320	B625_o_NA	Not differential
70b1771d26ec1d1e56236c7683609cc1	6.42811	Proteobacteria	Gammaproteobacteria	Diplorickettsiales	Diplorickettsiaceae	Aquicella	#N/A	0.00152521	RF1321	B1444_Aquicella	Fer
60967b2e897def3617676b8a18ba50a4	4.00733	Bacteroidetes	Ignavibacteria	Kryptoniales	BSV26	uncultured bacterium	uncultured bacterium	0.00152521	RF1322	B1100_uncultured bacterium	Non-fer
9921aaceef0282e5df0698cc43c382b0	1.60944	Firmicutes	Clostridia	Clostridiales	Family XVII	Sulfobacillus	#N/A	0.00152521	RF1323	B20335_Sulfobacillus	Not differential
11075e97438991b2f101f85ffd6ab4d3	4.11087	Proteobacteria	Deltaproteobacteria	Myxococcales	mle1-27	uncultured bacterium	uncultured bacterium	0.00152521	RF1324	B6153_uncultured bacterium	Not differential
64afb00b45e64cb00cd38122a698bc71	4.30407	Kiritimatiellaeota	Kiritimatiellae	WCHB1-41	uncultured Verrucomicrobia bacterium	uncultured Verrucomicrobia bacterium	uncultured Verrucomicrobia bacterium	0.00152521	RF1325	B5180_uncultured Verrucomicrobia bacterium	Not differential
JX224200.1.1220	4.09434	Firmicutes	Clostridia	Clostridiales	Ruminococcaceae	Ruminiclostridium 1	unidentified eubacterium clone BSV72	0.00152381	RF1326	B7488_Ruminiclostridium 1	Not differential
KC921181.1.1380	5.80513	Actinobacteria	Thermoleophilia	Gaiellales	Gaiellaceae	Gaiella	actinobacterium WWH12	0.00152381	RF1327	B2745_Gaiella	Not differential
88ceef3e0b4142205141bfa3924f5b0e	5.41165	Nitrospirae	4-29-1	uncultured proteobacterium	uncultured proteobacterium	uncultured proteobacterium	uncultured proteobacterium	0.00152381	RF1328	B4753_uncultured proteobacterium	Not differential
f8f38bf8c0054e477e737dfa5e10c045	3.52636	Firmicutes	Clostridia	Clostridiales	Ruminococcaceae	Sporobacter	#N/A	0.00152381	RF1329	B6576_Sporobacter	Not differential
bd66f5f9fd824d03d438d133a3b39456	3.55535	Elusimicrobia	Elusimicrobia	MVP-88	uncultured bacterium	uncultured bacterium	uncultured bacterium	0.00152381	RF1330	B6918_uncultured bacterium	Not differential
AB364876.1.1455	2.70805	Bacteroidetes	Ignavibacteria	Kryptoniales	BSV26	uncultured bacterium	uncultured bacterium	0.00151515	RF1331	B4058_uncultured bacterium	Not differential
KX752980.1.1497	5.27811	Actinobacteria	Thermoleophilia	Gaiellales	uncultured	bacterium Ellin6515	bacterium Ellin6515	0.0015125	RF1332	B1824_bacterium Ellin6515	Not differential
EF516751.1.1474	4.5326	Proteobacteria	Deltaproteobacteria	Myxococcales	Polyangiaceae	Pajaroellobacter	#N/A	0.00150893	RF1333	B8014_Pajaroellobacter	Non-fer
JX489868.1.1497	4.83628	Proteobacteria	Gammaproteobacteria	Oceanospirillales	Pseudohongiellaceae	BIyi10	uncultured soil bacterium	0.00150893	RF1334	B6425_BIyi10	Fer
EU861970.1.1512	7.19293	Actinobacteria	Thermoleophilia	Gaiellales	uncultured	#N/A	#N/A	0.00150893	RF1335	B158_f_uncultured	Non-fer
HM317725.1.1360	5.87212	Proteobacteria	Gammaproteobacteria	Xanthomonadales	Rhodanobacteraceae	Tahibacter	uncultured bacterium	0.00150893	RF1336	B2707_Tahibacter	Non-fer
CU921835.1.1310	5.76519	Proteobacteria	Alphaproteobacteria	Rhizobiales	Rhizobiales Incertae Sedis	uncultured	#N/A	0.00150893	RF1337	B1359_uncultured	Fer
AM935637.1.1320	5.26786	Chloroflexi	Anaerolineae	Anaerolineales	Anaerolineaceae	Longilinea	#N/A	0.00150893	RF1338	B5202_Longilinea	Fer
FJ484509.1.1243	5.79301	Planctomycetes	Phycisphaerae	MSBL9	SG8-4	uncultured planctomycete	uncultured planctomycete	0.00150893	RF1339	B622_uncultured planctomycete	Not differential
AP010968.1710936.1712460	5.45959	Actinobacteria	Actinobacteria	Streptomycetales	Streptomycetaceae	Kitasatospora	#N/A	0.00150893	RF1340	B4617_Kitasatospora	Non-fer
EF516898.1.1441	3.63759	Bacteroidetes	Bacteroidia	Sphingobacteriales	env.OPS 17	uncultured bacterium	uncultured bacterium	0.00150893	RF1341	B12283_uncultured bacterium	Non-fer
AB252950.1.1502	5.19296	Bacteroidetes	Ignavibacteria	Kryptoniales	BSV26	uncultured Chlorobi bacterium	uncultured Chlorobi bacterium	0.00150893	RF1342	B5468_uncultured Chlorobi bacterium	Non-fer
HQ120076.1.1499	2.07944	Gemmatimonadetes	Gemmatimonadetes	Gemmatimonadales	Gemmatimonadaceae	uncultured	#N/A	0.00150893	RF1343	B8069_uncultured	Not differential
LN563753.1.1385	4.91998	Acidobacteria	Subgroup 22	uncultured Acidobacterium sp.	uncultured Acidobacterium sp.	uncultured Acidobacterium sp.	uncultured Acidobacterium sp.	0.00150893	RF1344	B4359_uncultured Acidobacterium sp.	Fer
AF523971.1.1311	4.78749	Proteobacteria	Deltaproteobacteria	Myxococcales	BIrii41	uncultured soil bacterium	uncultured soil bacterium	0.00150893	RF1345	B1831_uncultured soil bacterium	Not differential
b6fa950d3bc7e8774a9401480f34dca5	2.19722	Proteobacteria	Deltaproteobacteria	Myxococcales	Archangiaceae	Anaeromyxobacter	#N/A	0.00150893	RF1346	B18656_Anaeromyxobacter	Not differential
8b678de8a45331f002c2a5fb8ebfd1a1	3.2581	Planctomycetes	Planctomycetacia	Gemmatales	Gemmataceae	uncultured	uncultured bacterium	0.00150893	RF1347	B4675_uncultured	Non-fer
7222b14077610d2ea9d0283f1d008787	2.89037	Gemmatimonadetes	Gemmatimonadetes	Gemmatimonadales	Gemmatimonadaceae	uncultured	uncultured alpha proteobacterium	0.00150893	RF1348	B9690_uncultured	Not differential
cbcedfeaa96f85fc376133ffde1ad52e	1.79176	BRC1	uncultured soil bacterium PBS-III-18	uncultured soil bacterium PBS-III-18	uncultured soil bacterium PBS-III-18	uncultured soil bacterium PBS-III-18	uncultured soil bacterium PBS-III-18	0.00150893	RF1349	B19932_uncultured soil bacterium PBS-III-18	Not differential
0b7f8c12d0e3932e0013232460bc8ae1	3.91202	Proteobacteria	Deltaproteobacteria	Myxococcales	Sandaracinaceae	uncultured	uncultured Polyangiaceae bacterium	0.00150893	RF1350	B10851_uncultured	Not differential
e3c4a49a1072ef8b5287040dd1fd56c3	0.693147	Patescibacteria	Berkelbacteria	#N/A	#N/A	#N/A	#N/A	0.00150893	RF1351	B22488_o_NA	Not differential
d15bf5043aef96ec21ff95a5421992de	2.19722	Patescibacteria	Microgenomatia	Candidatus Amesbacteria	Microgenomates bacterium SCGC AAA011-B20	Microgenomates bacterium SCGC AAA011-B20	Microgenomates bacterium SCGC AAA011-B20	0.00150893	RF1352	B18695_Microgenomates bacterium SCGC AAA011-B20	Non-fer
a704217d9fc4e702dd721d2c362d5185	5.12396	Bacteroidetes	Ignavibacteria	OPB56	uncultured bacterium KF-JG30-B11	uncultured bacterium KF-JG30-B11	uncultured bacterium KF-JG30-B11	0.00150893	RF1353	B2290_uncultured bacterium KF-JG30-B11	Not differential
943f0b3b43f072c6d3f08befd189d614	0.693147	#N/A	#N/A	#N/A	#N/A	#N/A	#N/A	0.00150776	RF1354	B22249_o_NA	Not differential
HM062163.1.1419	4.7185	Acidobacteria	Acidobacteriia	Acidobacteriales	uncultured	uncultured Acidobacteria bacterium	uncultured Acidobacteria bacterium	0.0015	RF1355	B5143_uncultured Acidobacteria bacterium	Not differential
KR779675.1.1326	4.85203	Chloroflexi	KD4-96	uncultured prokaryote	uncultured prokaryote	uncultured prokaryote	uncultured prokaryote	0.0015	RF1356	B6704_uncultured prokaryote	Non-fer
FPLP01006585.16.1483	3.09104	Chloroflexi	Anaerolineae	SBR1031	metagenome	metagenome	metagenome	0.0015	RF1357	B6777_metagenome	Not differential
19c7ef756a1c527783f2c839b5c95eaa	4.93447	Elusimicrobia	Elusimicrobia	MVP-88	uncultured bacterium	uncultured bacterium	uncultured bacterium	0.0015	RF1358	B2830_uncultured bacterium	Not differential
59a35e4302fa94ee033f52c4704a1072	2.94444	Patescibacteria	CPR2	uncultured bacterium	uncultured bacterium	uncultured bacterium	uncultured bacterium	0.0015	RF1359	B11369_uncultured bacterium	Not differential
299e1244b6140950c915df960bde5026	2.56495	Spirochaetes	Spirochaetia	Spirochaetales	Spirochaetaceae	Spirochaeta 2	#N/A	0.0015	RF1360	B17104_Spirochaeta 2	Not differential
0c77da80e68964e2918e3eb4f48b4ff2	5.14166	Elusimicrobia	Endomicrobia	Endomicrobiales	Endomicrobiaceae	Candidatus Endomicrobium	metagenome	0.0015	RF1361	B1699_Candidatus Endomicrobium	Fer
51074538d107f68fb9c10c9f3270721e	2.89037	Chloroflexi	Chloroflexia	Chloroflexales	Chloroflexaceae	FFCH7168	uncultured bacterium	0.0015	RF1362	B15782_FFCH7168	Not differential
AB661534.1.1493	5.09375	Proteobacteria	Deltaproteobacteria	Sva0485	uncultured prokaryote	uncultured prokaryote	uncultured prokaryote	0.00149387	RF1363	B2699_uncultured prokaryote	Fer
1a16d530165134bf8bfb522320b4c383	4.36945	Proteobacteria	Gammaproteobacteria	Diplorickettsiales	Diplorickettsiaceae	uncultured	#N/A	0.00149118	RF1364	B4831_uncultured	Non-fer
JX505286.1.1472	7.27031	Actinobacteria	Thermoleophilia	Gaiellales	uncultured	#N/A	#N/A	0.00147816	RF1365	B467_f_uncultured	Not differential
HM243795.1.1518	6.74406	Verrucomicrobia	Verrucomicrobiae	Pedosphaerales	Pedosphaeraceae	ADurb.Bin063-1	#N/A	0.00147692	RF1366	B698_ADurb.Bin063-1	Non-fer
GQ472367.1.1493	2.56495	Planctomycetes	Planctomycetacia	Pirellulales	Pirellulaceae	Pirellula	#N/A	0.00147692	RF1367	B6364_Pirellula	Not differential
HM332313.1.1320	6.24417	Acidobacteria	Acidobacteriia	Solibacterales	Solibacteraceae (Subgroup 3)	Bryobacter	uncultured Solibacteraceae bacterium	0.00147692	RF1368	B288_Bryobacter	Fer
KC554952.1.1515	5.2832	Actinobacteria	Actinobacteria	Micromonosporales	Micromonosporaceae	Dactylosporangium	#N/A	0.00147692	RF1369	B2470_Dactylosporangium	Non-fer
EU675665.1.1262	2.48491	Proteobacteria	Gammaproteobacteria	Enterobacteriales	Enterobacteriaceae	Serratia	#N/A	0.00147692	RF1370	B15661_Serratia	Not differential
FJ946559.1.1290	6.06843	Proteobacteria	Gammaproteobacteria	Betaproteobacteriales	Nitrosomonadaceae	IS-44	#N/A	0.00147692	RF1371	B450_IS-44	Non-fer
FN667160.1.1491	4.99721	Firmicutes	Bacilli	Bacillales	Thermoactinomycetaceae	Novibacillus	#N/A	0.00147692	RF1372	B5057_Novibacillus	Not differential
EU580501.1.1486	4.17439	Bacteroidetes	Bacteroidia	Sphingobacteriales	Sphingobacteriaceae	Pedobacter	#N/A	0.00147692	RF1373	B5909_Pedobacter	Not differential
KX753138.1.1478	5.79909	Planctomycetes	Planctomycetacia	Pirellulales	Pirellulaceae	uncultured	uncultured Planctomycetaceae bacterium	0.00147692	RF1374	B887_uncultured	Non-fer
JF198666.1.1321	4.30407	Chloroflexi	Dehalococcoidia	FW22	uncultured bacterium	uncultured bacterium	uncultured bacterium	0.00147692	RF1375	B5474_uncultured bacterium	Not differential
9dad315c2604cbbfc7039e1077dc10e3	4.26268	Planctomycetes	Phycisphaerae	MSBL9	SG8-4	uncultured planctomycete	uncultured planctomycete	0.00147692	RF1376	B1464_uncultured planctomycete	Not differential
f47912a3ba8376b79202cd09257f8f18	2.56495	Acidobacteria	Subgroup 22	uncultured organism	uncultured organism	uncultured organism	uncultured organism	0.00147692	RF1377	B12419_uncultured organism	Not differential
a8d4f76699bfa34443f2ac34aa5c092a	4.51086	Planctomycetes	Phycisphaerae	Tepidisphaerales	WD2101 soil group	#N/A	#N/A	0.00147692	RF1378	B3052_f_WD2101 soil group	Not differential
351d21fd2c59b21b48a4ee08306ed18c	4.18965	Chloroflexi	Anaerolineae	SBR1031	#N/A	#N/A	#N/A	0.00147692	RF1379	B9533_o_SBR1031	Not differential
b56604f95a662712c566a44b27d74c02	3.66356	Omnitrophicaeota	uncultured bacterium	uncultured bacterium	uncultured bacterium	uncultured bacterium	uncultured bacterium	0.00147692	RF1380	B4147_uncultured bacterium	Not differential
5cff7775e0c06e4da8529719e92f204b	4.72739	Proteobacteria	Deltaproteobacteria	SAR324 clade(Marine group B)	uncultured bacterium zdt-33i5	uncultured bacterium zdt-33i5	uncultured bacterium zdt-33i5	0.00144862	RF1381	B4238_uncultured bacterium zdt-33i5	Fer
c9ded6cadbedf9622f88f6dc138eb531	3.52636	FCPU426	uncultured bacterium	uncultured bacterium	uncultured bacterium	uncultured bacterium	uncultured bacterium	0.00144862	RF1382	B4993_uncultured bacterium	Fer
7175f3ad975283941ec5088aa7aae965	3.52636	Actinobacteria	Acidimicrobiia	uncultured	uncultured soil bacterium	uncultured soil bacterium	uncultured soil bacterium	0.00144862	RF1383	B12775_uncultured soil bacterium	Not differential
KJ192086.1.1464	4.47734	Bacteroidetes	Bacteroidia	Chitinophagales	Chitinophagaceae	uncultured	#N/A	0.00144747	RF1384	B3472_uncultured	Fer
8fea903bb6f6fe5c24b937a5dfe9aab5	1.60944	#N/A	#N/A	#N/A	#N/A	#N/A	#N/A	0.00144231	RF1385	B18592_o_NA	Not differential
AB600408.1.1359	5.05625	#N/A	#N/A	#N/A	#N/A	#N/A	#N/A	0.00144118	RF1386	B1278_o_NA	Fer
EF018692.1.1326	6.77992	Proteobacteria	Alphaproteobacteria	Rhizobiales	Hyphomicrobiaceae	Hyphomicrobium	uncultured Hyphomicrobiaceae bacterium	0.00144048	RF1387	B1200_Hyphomicrobium	Non-fer
FJ484515.1.1383	6.52942	Proteobacteria	Deltaproteobacteria	Syntrophobacterales	Syntrophaceae	uncultured	uncultured delta proteobacterium	0.00144048	RF1388	B1288_uncultured	Not differential
EU335150.1.1540	2.3979	Verrucomicrobia	Verrucomicrobiae	Pedosphaerales	Pedosphaeraceae	#N/A	#N/A	0.00144048	RF1389	B4440_f_Pedosphaeraceae	Not differential
66d5ff610ce55d125f4dea36757a2ed8	1.94591	Armatimonadetes	DG-56	uncultured bacterium	uncultured bacterium	uncultured bacterium	uncultured bacterium	0.00144048	RF1390	B7260_uncultured bacterium	Not differential
d48211f1b6fcbad6c0fdd674394c66d0	3.43399	Firmicutes	Bacilli	#N/A	#N/A	#N/A	#N/A	0.00144048	RF1391	B4807_o_NA	Not differential
94f842adb51baa213d77a4e31806d02f	4.02535	Chloroflexi	Dehalococcoidia	S085	#N/A	#N/A	#N/A	0.00144048	RF1392	B10359_o_S085	Not differential
KC290424.1.1571	5.76519	Bacteroidetes	Ignavibacteria	Kryptoniales	BSV26	uncultured soil bacterium	uncultured soil bacterium	0.00142857	RF1393	B549_uncultured soil bacterium	Not differential
EF516529.1.1485	5.53339	Verrucomicrobia	Verrucomicrobiae	Chthoniobacterales	Chthoniobacteraceae	Chthoniobacter	#N/A	0.00142857	RF1394	B4413_Chthoniobacter	Fer
cf897e070b720f4460dd5e2d32ef8e8a	3.58352	Firmicutes	Clostridia	Clostridiales	Ruminococcaceae	#N/A	#N/A	0.00142857	RF1395	B12544_f_Ruminococcaceae	Not differential
e1070348f9fa4f23dbe4467a5e94f7df	4.72739	Verrucomicrobia	Verrucomicrobiae	Pedosphaerales	Pedosphaeraceae	uncultured Crater Lake bacterium CL120-133	uncultured Crater Lake bacterium CL120-133	0.00142857	RF1396	B3186_uncultured Crater Lake bacterium CL120-133	Fer
9c6e75ab8c911bc17600d8b190eec72c	7.08506	Armatimonadetes	Chthonomonadetes	Chthonomonadales	uncultured bacterium SJA-22	uncultured bacterium SJA-22	uncultured bacterium SJA-22	0.00142857	RF1397	B318_uncultured bacterium SJA-22	Not differential
0c848605c042547082d7278fc4583ff2	3.29584	Firmicutes	Clostridia	Clostridiales	Ruminococcaceae	#N/A	#N/A	0.00142857	RF1398	B7444_f_Ruminococcaceae	Not differential
ff7ca5606c08ddddb7ccc5783e763af4	3.66356	Planctomycetes	Pla3 lineage	#N/A	#N/A	#N/A	#N/A	0.00142857	RF1399	B6386_o_NA	Not differential
GFBP01138475.1.1236	4.51086	Fibrobacteres	Fibrobacteria	Fibrobacterales	Fibrobacteraceae	possible genus 04	Juncus effusus	0.00142222	RF1400	B2996_possible genus 04	Not differential
KJ955651.1.1518	2.70805	Latescibacteria	Latescibacteria	Latescibacterales	Latescibacteraceae	Candidatus Latescibacter	uncultured Latescibacteria bacterium	0.00142222	RF1401	B14014_Candidatus Latescibacter	Non-fer
KR110064.1.1513	2.89037	Proteobacteria	Deltaproteobacteria	Myxococcales	Sandaracinaceae	uncultured	uncultured bacterium	0.00142222	RF1402	B7491_uncultured	Not differential
GQ340229.1.1410	5.40268	Acidobacteria	Subgroup 6	Acidobacteria bacterium SCN 69-37	Acidobacteria bacterium SCN 69-37	Acidobacteria bacterium SCN 69-37	Acidobacteria bacterium SCN 69-37	0.00142222	RF1403	B1688_Acidobacteria bacterium SCN 69-37	Fer
AB672235.1.1416	4.65396	Chloroflexi	Anaerolineae	RBG-13-54-9	#N/A	#N/A	#N/A	0.00142222	RF1404	B1890_o_RBG-13-54-9	Not differential
EU134013.1.1324	4.96284	Chloroflexi	Anaerolineae	SBR1031	A4b	uncultured bacterium	uncultured bacterium	0.00142105	RF1405	B3437_uncultured bacterium	Not differential
d8445c3c8a3ccbd6726ad97dd17cc90c	3.85015	Bacteroidetes	Bacteroidia	Bacteroidales	SB-5	bacterium YC-LK-LKJ31	bacterium YC-LK-LKJ31	0.00142105	RF1406	B7424_bacterium YC-LK-LKJ31	Not differential
6dafa3240a5e54fafb195ed16462d4d9	3.97029	Armatimonadetes	#N/A	#N/A	#N/A	#N/A	#N/A	0.00140833	RF1407	B6878_o_NA	Non-fer
6fcbf179bc34d4e9c7dfb13915b406dc	3.85015	Verrucomicrobia	Verrucomicrobiae	Chthoniobacterales	Chthoniobacteraceae	uncultured Verrucomicrobia bacterium	uncultured Verrucomicrobia bacterium	0.00140833	RF1408	B3159_uncultured Verrucomicrobia bacterium	Fer
501baf5cc7909e53b6efabcef7a1cc67	3.09104	Verrucomicrobia	Verrucomicrobiae	Pedosphaerales	Pedosphaeraceae	#N/A	#N/A	0.00140833	RF1409	B14839_f_Pedosphaeraceae	Not differential
583c04f9ec66bf96a89d649022fa04d4	7.662	Acidobacteria	Acidobacteriia	Acidobacteriales	uncultured	#N/A	#N/A	0.00140833	RF1410	B183_f_uncultured	Not differential
b13aa3e15fc88608d6296813ed2c64c4	4.82831	Proteobacteria	Deltaproteobacteria	#N/A	#N/A	#N/A	#N/A	0.0014	RF1411	B2333_o_NA	Not differential
4abcafc33b8d3faf8a2e81466c90acb6	5.15906	Chloroflexi	Anaerolineae	Anaerolineales	Anaerolineaceae	uncultured	#N/A	0.0014	RF1412	B3425_uncultured	Not differential
AB487131.1.1364	6.93147	Gemmatimonadetes	Gemmatimonadetes	Gemmatimonadales	Gemmatimonadaceae	Gemmatimonas	uncultured Gemmatimonadaceae bacterium	0.0013986	RF1413	B320_Gemmatimonas	Not differential
80f31ee26e991f31478c83bbefc4052e	3.52636	Proteobacteria	Deltaproteobacteria	Myxococcales	Phaselicystidaceae	Phaselicystis	uncultured prokaryote	0.0013986	RF1414	B12780_Phaselicystis	Not differential
9340e1db262dbd32e9ac9a945fa08cc9	4.33073	Firmicutes	Bacilli	Bacillales	Paenibacillaceae	Paenibacillus	#N/A	0.0013986	RF1415	B5735_Paenibacillus	Non-fer
JF733443.1.1444	4.86753	Proteobacteria	Alphaproteobacteria	Rhizobiales	Rhodomicrobiaceae	Rhodomicrobium	uncultured Rhodomicrobium sp.	0.00139319	RF1416	B944_Rhodomicrobium	Not differential
MEDZ01000053.59.1587	2.89037	Gemmatimonadetes	Gemmatimonadetes	Gemmatimonadales	Gemmatimonadaceae	uncultured	Gemmatimonadetes bacterium SCN 70-22	0.00139319	RF1417	B6372_uncultured	Not differential
AY133073.1.1450	5.42495	Proteobacteria	Gammaproteobacteria	Betaproteobacteriales	Rhodocyclaceae	Azoarcus	#N/A	0.00139319	RF1418	B2607_Azoarcus	Non-fer
EF088329.1.1445	4.66344	Firmicutes	Clostridia	Clostridiales	Clostridiaceae 1	#N/A	#N/A	0.00139319	RF1419	B7430_f_Clostridiaceae 1	Not differential
HM438054.1.1497	6.10256	Proteobacteria	Deltaproteobacteria	Myxococcales	Sandaracinaceae	uncultured	uncultured Polyangiaceae bacterium	0.00139319	RF1420	B1310_uncultured	Not differential
99d604c614e4476c69c2ead53353ffb7	3.46574	Chloroflexi	Anaerolineae	RBG-13-54-9	uncultured Caldilineae bacterium	uncultured Caldilineae bacterium	uncultured Caldilineae bacterium	0.00139319	RF1421	B7959_uncultured Caldilineae bacterium	Not differential
b19911607db5324856e7a45a457f099a	4.57471	Proteobacteria	Deltaproteobacteria	Myxococcales	KD3-10	metagenome	metagenome	0.00139319	RF1422	B4375_metagenome	Not differential
243d9b256464b8ec186a29ebf2474a29	2.48491	Chlamydiae	Chlamydiae	Chlamydiales	Parachlamydiaceae	#N/A	#N/A	0.00139319	RF1423	B15745_f_Parachlamydiaceae	Not differential
b2191f44adce0d410e1a94962473a523	3.46574	Planctomycetes	Pla3 lineage	uncultured soil bacterium PBS-II-37	uncultured soil bacterium PBS-II-37	uncultured soil bacterium PBS-II-37	uncultured soil bacterium PBS-II-37	0.00138988	RF1424	B7184_uncultured soil bacterium PBS-II-37	Not differential
DQ404787.1.1467	4.76217	Chloroflexi	Dehalococcoidia	661239	uncultured bacterium	uncultured bacterium	uncultured bacterium	0.00138889	RF1425	B840_uncultured bacterium	Not differential
7344c8fd1fdb4ee5c8a5233c9383a34d	6.81235	Chloroflexi	Anaerolineae	Anaerolineales	Anaerolineaceae	#N/A	#N/A	0.00138889	RF1426	B159_f_Anaerolineaceae	Not differential
d947b5f4c61ab52b1175e6ccefe5c183	5.79909	Chloroflexi	Anaerolineae	Anaerolineales	Anaerolineaceae	uncultured	#N/A	0.00136742	RF1427	B366_uncultured	Fer
EU134478.1.1340	6.04025	Proteobacteria	Deltaproteobacteria	Desulfuromonadales	Geobacteraceae	Geobacter	#N/A	0.00136111	RF1428	B540_Geobacter	Not differential
KM200750.1.1512	4.68213	Acidobacteria	Subgroup 6	Acidobacteria bacterium SCN 69-37	Acidobacteria bacterium SCN 69-37	Acidobacteria bacterium SCN 69-37	Acidobacteria bacterium SCN 69-37	0.00136111	RF1429	B3811_Acidobacteria bacterium SCN 69-37	Not differential
d3d7a94dfa97de3c5d83d1e6cccd882e	3.58352	Cyanobacteria	Sericytochromatia	uncultured bacterium	uncultured bacterium	uncultured bacterium	uncultured bacterium	0.00136111	RF1430	B4612_uncultured bacterium	Not differential
9957ec694a7bfe8adeefaafc81b381d5	1.79176	Planctomycetes	Planctomycetacia	Gemmatales	Gemmataceae	uncultured	uncultured bacterium	0.00136111	RF1431	B19857_uncultured	Not differential
0f54c55ab0179d97dde5a63d478b917b	3.63759	Planctomycetes	Phycisphaerae	MSBL9	GWC2-45-44	uncultured bacterium	uncultured bacterium	0.00136111	RF1432	B3785_uncultured bacterium	Fer
006e71044917e5e7ac31716972a9e388	3.89182	Bacteroidetes	Bacteroidia	Cytophagales	Spirosomaceae	uncultured	metagenome	0.00136111	RF1433	B10167_uncultured	Not differential
3feab7020204cf260b70e622888f7f0f	3.13549	Chloroflexi	Anaerolineae	ADurb.Bin180	#N/A	#N/A	#N/A	0.00136111	RF1434	B10441_o_ADurb.Bin180	Not differential
JN397968.1.1431	7.10661	Chloroflexi	Anaerolineae	Anaerolineales	Anaerolineaceae	uncultured	#N/A	0.00135	RF1435	B255_uncultured	Not differential
b2effc45d3306f14254d08c1260b5822	2.63906	Patescibacteria	Gracilibacteria	Candidatus Peregrinibacteria	uncultured bacterium	uncultured bacterium	uncultured bacterium	0.00135	RF1436	B16956_uncultured bacterium	Non-fer
a3fcd532613074fb900ffc14455250b5	2.07944	PAUC34f	uncultured Deferribacteres bacterium	uncultured Deferribacteres bacterium	uncultured Deferribacteres bacterium	uncultured Deferribacteres bacterium	uncultured Deferribacteres bacterium	0.00135	RF1437	B13931_uncultured Deferribacteres bacterium	Not differential
c3178758d9ebc162b247f3f1b981f02e	1.09861	#N/A	#N/A	#N/A	#N/A	#N/A	#N/A	0.00135	RF1438	B12806_o_NA	Not differential
3649423984dd005e3913d7ce50b4f707	5.66296	Chloroflexi	Dehalococcoidia	S085	uncultured bacterium	uncultured bacterium	uncultured bacterium	0.00135	RF1439	B683_uncultured bacterium	Non-fer
910be951e8d5b7647eeda55d292fe5ff	4.99721	Actinobacteria	MB-A2-108	uncultured Streptomyces sp.	uncultured Streptomyces sp.	uncultured Streptomyces sp.	uncultured Streptomyces sp.	0.00135	RF1440	B2678_uncultured Streptomyces sp.	Not differential
FPLK01000257.10.1512	4.59512	Lentisphaerae	Oligosphaeria	Oligosphaerales	Lenti-02	metagenome	metagenome	0.00133929	RF1441	B5853_metagenome	Not differential
EF020258.1.1328	5.26269	Proteobacteria	Alphaproteobacteria	Micropepsales	Micropepsaceae	uncultured	#N/A	0.00133929	RF1442	B2353_uncultured	Non-fer
06af4d9d7e1c19079431e7234923d64f	4.89784	Actinobacteria	Coriobacteriia	OPB41	#N/A	#N/A	#N/A	0.00133929	RF1443	B5211_o_OPB41	Fer
08489954860b0e94f092f03e5908952f	2.48491	Omnitrophicaeota	#N/A	#N/A	#N/A	#N/A	#N/A	0.00133929	RF1444	B5685_o_NA	Not differential
AB487922.1.1364	1.09861	Firmicutes	Clostridia	Clostridiales	Peptococcaceae	Thermincola	uncultured bacterium	0.00133333	RF1445	B15843_Thermincola	Not differential
DQ499301.1.1524	3.3673	Rokubacteria	NC10	Rokubacteriales	uncultured soil bacterium	uncultured soil bacterium	uncultured soil bacterium	0.00133333	RF1446	B3328_uncultured soil bacterium	Non-fer
EU134602.1.1355	3.68888	Elusimicrobia	Lineage IIa	uncultured Elusimicrobia bacterium	uncultured Elusimicrobia bacterium	uncultured Elusimicrobia bacterium	uncultured Elusimicrobia bacterium	0.00133333	RF1447	B12028_uncultured Elusimicrobia bacterium	Not differential
896eb6cb5b7c6c9147c534d4337b9d85	1.60944	#N/A	#N/A	#N/A	#N/A	#N/A	#N/A	0.00133333	RF1448	B20308_o_NA	Not differential
LC124581.1.1479	6.48616	Proteobacteria	Deltaproteobacteria	Syntrophobacterales	Syntrophaceae	Syntrophus	uncultured Syntrophaceae bacterium	0.00133333	RF1449	B1239_Syntrophus	Non-fer
9493ebbcae72da91b43f6855ca23d437	4.8828	Proteobacteria	Deltaproteobacteria	Myxococcales	Sandaracinaceae	Sandaracinus	uncultured soil bacterium	0.00132675	RF1450	B2632_Sandaracinus	Not differential
FPLS01005173.1.1333	7.09755	Bacteroidetes	Bacteroidia	Sphingobacteriales	Sphingobacteriaceae	Pedobacter	#N/A	0.00132549	RF1451	B885_Pedobacter	Not differential
FPLS01023575.1.1462	4.00733	Chloroflexi	Anaerolineae	Anaerolineales	Anaerolineaceae	uncultured	#N/A	0.00132549	RF1452	B2761_uncultured	Not differential
KC424697.1.1525	5.1358	Bacteroidetes	Ignavibacteria	Kryptoniales	BSV26	uncultured bacterium	uncultured bacterium	0.00132549	RF1453	B2163_uncultured bacterium	Fer
GQ339116.1.1476	5.02388	Gemmatimonadetes	Gemmatimonadetes	Gemmatimonadales	Gemmatimonadaceae	uncultured	uncultured Nitrospira sp.	0.00132549	RF1454	B1686_uncultured	Not differential
AB486311.1.1379	4.70953	Proteobacteria	Deltaproteobacteria	Myxococcales	Archangiaceae	Anaeromyxobacter	#N/A	0.00132549	RF1455	B1038_Anaeromyxobacter	Not differential
AY218774.1.1487	4.61512	Proteobacteria	Gammaproteobacteria	Betaproteobacteriales	Burkholderiaceae	#N/A	#N/A	0.00132549	RF1456	B2461_f_Burkholderiaceae	Not differential
070d49b4f4f4d6287c9e216361f13b5c	4.09434	Firmicutes	Clostridia	Clostridiales	#N/A	#N/A	#N/A	0.00132549	RF1457	B9990_o_Clostridiales	Not differential
16a3d0429e7d7c5edef9f7f2e5ea5207	3.82864	Planctomycetes	vadinHA49	bacterium UW 659-2-F09	bacterium UW 659-2-F09	bacterium UW 659-2-F09	bacterium UW 659-2-F09	0.00132549	RF1458	B8759_bacterium UW 659-2-F09	Not differential
236a779e097bab2de71a73b207472b35	2.63906	Chloroflexi	Anaerolineae	SBR1031	#N/A	#N/A	#N/A	0.00132549	RF1459	B11356_o_SBR1031	Not differential
AB552893.1.1393	7.23562	Proteobacteria	Gammaproteobacteria	Betaproteobacteriales	Burkholderiaceae	Acidovorax	#N/A	0.00131364	RF1460	B846_Acidovorax	Fer
EF516172.1.1475	3.58352	Verrucomicrobia	Verrucomicrobiae	Opitutales	Opitutaceae	Opitutus	uncultured Opitutus sp.	0.00131364	RF1461	B4639_Opitutus	Not differential
JN038990.1.1504	4.17439	Firmicutes	Negativicutes	Selenomonadales	Veillonellaceae	uncultured	#N/A	0.00129293	RF1462	B6146_uncultured	Fer
d43c460319e251b6dce7c93bcfb0faf2	5.42053	Proteobacteria	Deltaproteobacteria	Myxococcales	Polyangiaceae	Pajaroellobacter	#N/A	0.00129293	RF1463	B4728_Pajaroellobacter	Fer
ac5e128599d381176e9aafd5f02940dc	5.21494	Kiritimatiellaeota	Kiritimatiellae	WCHB1-41	#N/A	#N/A	#N/A	0.00128571	RF1464	B2517_o_WCHB1-41	Not differential
d19e96a32308df89bc52683953fda6f9	3.29584	Patescibacteria	Saccharimonadia	Saccharimonadales	uncultured bacterium	uncultured bacterium	uncultured bacterium	0.00128571	RF1465	B11095_uncultured bacterium	Not differential
AB426209.1.1394	6.70073	Acidobacteria	Aminicenantia	Aminicenantales	uncultured prokaryote	uncultured prokaryote	uncultured prokaryote	0.00128321	RF1466	B295_uncultured prokaryote	Not differential
HAFQ01034874.73.1490	6.05678	Proteobacteria	Gammaproteobacteria	Pseudomonadales	Pseudomonadaceae	Pseudomonas	#N/A	0.00128321	RF1467	B2644_Pseudomonas	Non-fer
KC431920.1.1377	4.38203	Verrucomicrobia	Verrucomicrobiae	Opitutales	Opitutaceae	#N/A	#N/A	0.00128321	RF1468	B5405_f_Opitutaceae	Not differential
AY998140.1.1501	3.61092	Proteobacteria	Deltaproteobacteria	Desulfobacterales	Desulfobulbaceae	[Desulfobacterium] catecholicum group	#N/A	0.00128321	RF1469	B12382_[Desulfobacterium] catecholicum group	Not differential
7bc2cddc32bfcd2e3be69371b164e8a6	2.19722	Chloroflexi	Anaerolineae	SBR1031	uncultured soil bacterium	uncultured soil bacterium	uncultured soil bacterium	0.00128321	RF1470	B4130_uncultured soil bacterium	Not differential
FJ936965.1.1497	7.56735	Proteobacteria	Gammaproteobacteria	Xanthomonadales	Xanthomonadaceae	Arenimonas	#N/A	0.0012605	RF1471	B471_Arenimonas	Fer
FR667812.1.1511	3.82864	Bacteroidetes	Ignavibacteria	Ignavibacteriales	SR-FBR-L83	uncultured bacterium	uncultured bacterium	0.00124103	RF1472	B7479_uncultured bacterium	Fer
FQ658976.2.1373	5.0876	Acidobacteria	Holophagae	Subgroup 7	uncultured bacterium SJA-36	uncultured bacterium SJA-36	uncultured bacterium SJA-36	0.00124103	RF1473	B5807_uncultured bacterium SJA-36	Not differential
c23534db3b6d69c992f29f90fa36fe3a	4.17439	WS2	#N/A	#N/A	#N/A	#N/A	#N/A	0.00124103	RF1474	B6547_o_NA	Not differential
9315982dae3330d0a96648fde42aa7c8	2.94444	Chloroflexi	Anaerolineae	Anaerolineales	Anaerolineaceae	#N/A	#N/A	0.001225	RF1475	B9698_f_Anaerolineaceae	Not differential
AF524005.1.1260	5.77455	Nitrospirae	Thermodesulfovibrionia	uncultured	#N/A	#N/A	#N/A	0.00121362	RF1476	B493_o_uncultured	Non-fer
EU978819.1.1276	6.01127	Proteobacteria	Gammaproteobacteria	Betaproteobacteriales	Burkholderiaceae	Massilia	#N/A	0.00121362	RF1477	B378_Massilia	Not differential
JX223331.1.1309	3.09104	Firmicutes	Clostridia	Clostridiales	Peptostreptococcaceae	Sporacetigenium	uncultured Firmicutes bacterium	0.00121362	RF1478	B7281_Sporacetigenium	Not differential
KF074751.1.1368	3.68888	Proteobacteria	Gammaproteobacteria	Betaproteobacteriales	#N/A	#N/A	#N/A	0.00121362	RF1479	B2159_o_Betaproteobacteriales	Not differential
JF231287.1.1300	4.67283	Chloroflexi	Chloroflexia	Chloroflexales	Roseiflexaceae	uncultured	uncultured Chloroflexaceae bacterium	0.00121362	RF1480	B5017_uncultured	Fer
JQ408070.1.1306	5.7869	Proteobacteria	Alphaproteobacteria	Rhizobiales	Xanthobacteraceae	Pseudorhodoplanes	#N/A	0.00121362	RF1481	B3775_Pseudorhodoplanes	Non-fer
JN615838.1.1398	4.2485	Rokubacteria	NC10	Rokubacteriales	uncultured candidate division SPAM bacterium	uncultured candidate division SPAM bacterium	uncultured candidate division SPAM bacterium	0.00121362	RF1482	B7533_uncultured candidate division SPAM bacterium	Not differential
6c20051969f6f120fe48d63e7a3a762d	1.38629	Cyanobacteria	Sericytochromatia	#N/A	#N/A	#N/A	#N/A	0.00121362	RF1483	B10693_o_NA	Not differential
9f3855a8ff321a2176132b42dee71045	2.30259	Latescibacteria	Latescibacteria	Latescibacterales	Latescibacteraceae	Candidatus Latescibacter	metagenome	0.00121362	RF1484	B18259_Candidatus Latescibacter	Not differential
4d85b60940280517beea6c8aab768e1e	1.09861	Proteobacteria	Deltaproteobacteria	Bdellovibrionales	Bdellovibrionaceae	Bdellovibrio	#N/A	0.00121362	RF1485	B19735_Bdellovibrio	Not differential
b3fcb3dd0b52aedc3a889d101b4b4b77	3.80666	Actinobacteria	Thermoleophilia	Gaiellales	uncultured	#N/A	#N/A	0.00121362	RF1486	B4412_f_uncultured	Fer
d86ec65e6f111c0091aede3d8160baa7	1.38629	WS1	uncultured bacterium	uncultured bacterium	uncultured bacterium	uncultured bacterium	uncultured bacterium	0.00121362	RF1487	B10291_uncultured bacterium	Not differential
KC189633.1.1506	3.09104	Proteobacteria	Gammaproteobacteria	Coxiellales	Coxiellaceae	Coxiella	uncultured hydrocarbon seep bacterium BPC023	0.00121212	RF1488	B14992_Coxiella	Not differential
HQ462477.1.1270	5.63835	Proteobacteria	Gammaproteobacteria	Betaproteobacteriales	Burkholderiaceae	#N/A	#N/A	0.0012	RF1489	B1304_f_Burkholderiaceae	Non-fer
EU276438.1.1487	5.59099	Acidobacteria	Subgroup 6	unidentified	unidentified	unidentified	unidentified	0.0012	RF1490	B606_unidentified	Fer
FPLS01034779.10.1302	4.15888	Latescibacteria	#N/A	#N/A	#N/A	#N/A	#N/A	0.0012	RF1491	B5656_o_NA	Not differential
CU918816.1.1376	1.09861	Hydrogenedentes	Hydrogenedentia	Hydrogenedentiales	Hydrogenedensaceae	Candidatus Hydrogenedentes bacterium ADurb.Bin101	Candidatus Hydrogenedentes bacterium ADurb.Bin101	0.0012	RF1492	B19942_Candidatus Hydrogenedentes bacterium ADurb.Bin101	Not differential
c8e9aa700e3fd272bde04eb3ceef36b0	4.11087	Proteobacteria	Deltaproteobacteria	Myxococcales	Haliangiaceae	Haliangium	#N/A	0.0012	RF1493	B9940_Haliangium	Not differential
FJ466151.1.1395	6.4677	Acidobacteria	Acidobacteriia	Subgroup 2	uncultured Holophaga sp.	uncultured Holophaga sp.	uncultured Holophaga sp.	0.0012	RF1494	B309_uncultured Holophaga sp.	Fer
CU466895.1.1355	6.56103	Proteobacteria	Gammaproteobacteria	Betaproteobacteriales	Rhodocyclaceae	#N/A	#N/A	0.00119048	RF1495	B2264_f_Rhodocyclaceae	Non-fer
FN436138.1.1497	4.29046	Gemmatimonadetes	Gemmatimonadetes	Gemmatimonadales	Gemmatimonadaceae	#N/A	#N/A	0.00119048	RF1496	B9112_f_Gemmatimonadaceae	Fer
d9c4026da1cd88668aca2ebbce24ffd4	5.64897	Chloroflexi	Anaerolineae	RBG-13-54-9	#N/A	#N/A	#N/A	0.00119048	RF1497	B1320_o_RBG-13-54-9	Not differential
e07643b1c02f50ccdef51cfde7f5b2b2	1.79176	Fibrobacteres	Fibrobacteria	Fibrobacterales	B122	uncultured bacterium	uncultured bacterium	0.00119048	RF1498	B10387_uncultured bacterium	Not differential
3b6c4cd6e72cf7efde63275824159dce	2.70805	Proteobacteria	Deltaproteobacteria	Oligoflexales	Oligoflexaceae	Oligoflexus	metagenome	0.00119048	RF1499	B16535_Oligoflexus	Not differential
EU132925.1.1343	5.09987	Actinobacteria	Actinobacteria	Corynebacteriales	Mycobacteriaceae	Mycobacterium	#N/A	0.00117361	RF1500	B5765_Mycobacterium	Not differential
AB486983.1.1334	2.77259	Cyanobacteria	Oxyphotobacteria	Leptolyngbyales	Leptolyngbyaceae	Leptolyngbya PCC-6306	Leptolyngbya sp. CENA520	0.00117361	RF1501	B11401_Leptolyngbya PCC-6306	Not differential
KC758903.1.1386	3.09104	Bacteroidetes	Bacteroidia	Bacteroidales	Prolixibacteraceae	WCHB1-32	#N/A	0.00117361	RF1502	B4934_WCHB1-32	Not differential
LN570440.1.1296	3.2581	Proteobacteria	Alphaproteobacteria	Caulobacterales	Hyphomonadaceae	SWB02	metagenome	0.00117361	RF1503	B9903_SWB02	Not differential
bda889f62f32e12d199b9185c9a1e9ba	2.99573	Verrucomicrobia	Verrucomicrobiae	Pedosphaerales	Pedosphaeraceae	#N/A	#N/A	0.00117361	RF1504	B15376_f_Pedosphaeraceae	Not differential
1d9316d52cf52d0cd75b42ee761d4382	3.61092	Planctomycetes	Planctomycetacia	Gemmatales	Gemmataceae	Gemmata	#N/A	0.00117361	RF1505	B12325_Gemmata	Not differential
b6bf888aee5348f89d3bbc586af9a750	4.2485	Proteobacteria	Deltaproteobacteria	Myxococcales	Archangiaceae	Anaeromyxobacter	uncultured proteobacterium	0.00117361	RF1506	B2907_Anaeromyxobacter	Not differential
8dbb8fad87e2e0acb5ed2e67279ff1d6	6.19236	Chloroflexi	Anaerolineae	SJA-15	uncultured Chloroflexi bacterium	uncultured Chloroflexi bacterium	uncultured Chloroflexi bacterium	0.00117361	RF1507	B1969_uncultured Chloroflexi bacterium	Fer
KC569837.1.1288	3.3673	Proteobacteria	Alphaproteobacteria	Caulobacterales	Hyphomonadaceae	SWB02	uncultured alpha proteobacterium	0.00116827	RF1508	B6477_SWB02	Not differential
5880441410ceff5704643588726b125f	2.07944	Patescibacteria	Microgenomatia	Candidatus Amesbacteria	#N/A	#N/A	#N/A	0.00116667	RF1509	B18191_o_Candidatus Amesbacteria	Fer
FJ824041.1.1327	4.82831	Planctomycetes	Planctomycetacia	Pirellulales	Pirellulaceae	uncultured	#N/A	0.00113287	RF1510	B3142_uncultured	Not differential
FPLS01017590.13.1514	4.02535	Actinobacteria	Acidimicrobiia	uncultured	metagenome	metagenome	metagenome	0.00113287	RF1511	B2269_metagenome	Fer
HQ119156.1.1337	5.19296	Chloroflexi	TK10	uncultured Chloroflexus sp.	uncultured Chloroflexus sp.	uncultured Chloroflexus sp.	uncultured Chloroflexus sp.	0.00112941	RF1512	B1144_uncultured Chloroflexus sp.	Not differential
KP728204.1.1467	3.13549	Spirochaetes	Leptospirae	Leptospirales	Leptospiraceae	Leptonema	uncultured bacterium	0.00112941	RF1513	B5196_Leptonema	Not differential
ebf9e404ad8d526ccd8fa57e7e66441a	1.94591	Proteobacteria	Gammaproteobacteria	Methylococcales	Methylococcaceae	#N/A	#N/A	0.00112941	RF1514	B14342_f_Methylococcaceae	Not differential
ab6bc2509bae88c67ad73260999f1c89	5.27811	Chloroflexi	Anaerolineae	Anaerolineales	Anaerolineaceae	Anaerolinea	uncultured soil bacterium	0.00112941	RF1515	B3130_Anaerolinea	Fer
KY302231.1.1314	7.44015	Actinobacteria	Actinobacteria	Micrococcales	Microbacteriaceae	Cryobacterium	#N/A	0.00112281	RF1516	B169_Cryobacterium	Not differential
FM866275.1.1450	6.08677	Bacteroidetes	Bacteroidia	Chitinophagales	Chitinophagaceae	Flavisolibacter	#N/A	0.00112281	RF1517	B351_Flavisolibacter	Non-fer
5a69f990c7b2f4f9b66952e79f3d1f18	5.75257	Kiritimatiellaeota	Kiritimatiellae	WCHB1-41	uncultured Verrucomicrobia bacterium	uncultured Verrucomicrobia bacterium	uncultured Verrucomicrobia bacterium	0.00111111	RF1518	B2767_uncultured Verrucomicrobia bacterium	Fer
CU923178.1.1385	4.40672	Proteobacteria	Deltaproteobacteria	Desulfarculales	Desulfarculaceae	uncultured	uncultured Desulfuromonadales bacterium	0.00109804	RF1519	B4029_uncultured	Non-fer
HQ597109.1.1515	4.06044	Acidobacteria	Blastocatellia (Subgroup 4)	Pyrinomonadales	Pyrinomonadaceae	RB41	#N/A	0.0010947	RF1520	B535_RB41	Non-fer
FPLS01041741.9.1413	1.79176	Patescibacteria	ABY1	Candidatus Magasanikbacteria	metagenome	metagenome	metagenome	0.0010947	RF1521	B15194_metagenome	Non-fer
EU542454.1.1441	3.29584	Chloroflexi	Dehalococcoidia	Dehalococcoidales	Dehalococcoidaceae	Dehalogenimonas	#N/A	0.0010947	RF1522	B6360_Dehalogenimonas	Not differential
6b88e1aeef96f349671dfe3aedca4a96	5.69373	Chloroflexi	Anaerolineae	SBR1031	A4b	uncultured bacterium	uncultured bacterium	0.0010947	RF1523	B1962_uncultured bacterium	Not differential
DQ404771.1.1488	6.89669	Nitrospirae	Thermodesulfovibrionia	uncultured	uncultured prokaryote	uncultured prokaryote	uncultured prokaryote	0.00108889	RF1524	B775_uncultured prokaryote	Not differential
685ee91fa1a756edb20c3aa2da701a8b	2.30259	Proteobacteria	Gammaproteobacteria	#N/A	#N/A	#N/A	#N/A	0.00108889	RF1525	B14084_o_NA	Non-fer
c81c3967bcd93e1037ccddfd89f28df6	2.70805	#N/A	#N/A	#N/A	#N/A	#N/A	#N/A	0.00108889	RF1526	B10035_o_NA	Not differential
bb8dfb799008f06a79b801debdc2e08b	4.30407	FCPU426	metagenome	metagenome	metagenome	metagenome	metagenome	0.00108889	RF1527	B6987_metagenome	Non-fer
4b24f66c107d0a5ea6a4b3d702ad873c	5.273	Proteobacteria	Alphaproteobacteria	#N/A	#N/A	#N/A	#N/A	0.00108333	RF1528	B2831_o_NA	Non-fer
KJ191880.1.1479	4.79579	Elusimicrobia	Lineage IIa	#N/A	#N/A	#N/A	#N/A	0.00108036	RF1529	B5109_o_NA	Fer
fd41dbcac769e7211efbb812dd754a2e	2.48491	Cyanobacteria	Sericytochromatia	uncultured Bacillales bacterium	uncultured Bacillales bacterium	uncultured Bacillales bacterium	uncultured Bacillales bacterium	0.00108036	RF1530	B17665_uncultured Bacillales bacterium	Fer
e999ebd4a186b7ca2b53f6878705f136	4.86753	Chloroflexi	Dehalococcoidia	RBG-13-46-9	uncultured bacterium	uncultured bacterium	uncultured bacterium	0.00107143	RF1531	B1672_uncultured bacterium	Not differential
DQ676315.1.1411	5.56452	Bacteroidetes	Ignavibacteria	SJA-28	uncultured Chlorobi bacterium	uncultured Chlorobi bacterium	uncultured Chlorobi bacterium	0.00106667	RF1532	B1854_uncultured Chlorobi bacterium	Not differential
LN880487.1.1414	3.43399	Elusimicrobia	Lineage IIb	uncultured bacterium	uncultured bacterium	uncultured bacterium	uncultured bacterium	0.00106667	RF1533	B3474_uncultured bacterium	Not differential
1d301ac464730d77b5666b08f0e8af44	3.3673	Latescibacteria	uncultured bacterium	uncultured bacterium	uncultured bacterium	uncultured bacterium	uncultured bacterium	0.00106667	RF1534	B2382_uncultured bacterium	Fer
JX222481.1.1459	4.48864	Firmicutes	Clostridia	Clostridiales	Peptococcaceae	Desulfosporosinus	#N/A	0.00105	RF1535	B8206_Desulfosporosinus	Not differential
d146b276cad06c805b02a70a331711e7	1.09861	Latescibacteria	uncultured bacterium	uncultured bacterium	uncultured bacterium	uncultured bacterium	uncultured bacterium	0.00104644	RF1536	B11175_uncultured bacterium	Not differential
e5a925bf5c9c6380199ef26d4185e65d	2.48491	Hydrogenedentes	Hydrogenedentia	Hydrogenedentiales	Hydrogenedensaceae	uncultured soil bacterium	uncultured soil bacterium	0.00104644	RF1537	B17636_uncultured soil bacterium	Not differential
f3113eac932ef4f2759faee6f138ad46	4.09434	Cyanobacteria	Oxyphotobacteria	Nostocales	Nostocaceae	Nostoc PCC-7107	#N/A	0.00104167	RF1538	B10055_Nostoc PCC-7107	Not differential
AB486936.1.1369	5.75257	Bacteroidetes	Ignavibacteria	Ignavibacteriales	uncultured bacterium	uncultured bacterium	uncultured bacterium	0.00102564	RF1539	B1433_uncultured bacterium	Not differential
JX505008.1.1437	1.09861	Actinobacteria	Acidimicrobiia	IMCC26256	#N/A	#N/A	#N/A	0.00102564	RF1540	B2130_o_IMCC26256	Not differential
906acb7252d1870811780439f10fe294	1.79176	Chlamydiae	Chlamydiae	Chlamydiales	Parachlamydiaceae	Neochlamydia	endosymbiont of Naegleria clarki	0.001	RF1541	B17186_Neochlamydia	Not differential
55200b9bdbce292d917a6b642332618e	5.86363	Chloroflexi	Anaerolineae	Anaerolineales	Anaerolineaceae	uncultured	#N/A	0.000992029	RF1542	B1565_uncultured	Non-fer
EU135314.1.1300	3.4012	Patescibacteria	Saccharimonadia	Saccharimonadales	uncultured bacterium	uncultured bacterium	uncultured bacterium	0.000982456	RF1543	B2983_uncultured bacterium	Not differential
JX224110.1.1417	4.99721	Proteobacteria	Deltaproteobacteria	Desulfobacterales	Desulfobulbaceae	#N/A	#N/A	0.00095	RF1544	B1177_f_Desulfobulbaceae	Not differential
KF804090.1.1455	5.96358	Bacteroidetes	Bacteroidia	Flavobacteriales	Flavobacteriaceae	Flavobacterium	Flavobacterium sp. WW21	0.000947368	RF1545	B3115_Flavobacterium	Not differential
DQ887938.1.1463	1.94591	Firmicutes	Clostridia	Thermoanaerobacterales	Thermoanaerobacteraceae	Syntrophaceticus	anaerobic digester metagenome	0.000947368	RF1546	B17980_Syntrophaceticus	Not differential
EF515931.1.1464	5.27811	Proteobacteria	Deltaproteobacteria	Myxococcales	Haliangiaceae	Haliangium	uncultured prokaryote	0.000947368	RF1547	B338_Haliangium	Not differential
HE602783.1.1341	2.07944	Patescibacteria	Parcubacteria	uncultured bacterium	uncultured bacterium	uncultured bacterium	uncultured bacterium	0.000947368	RF1548	B14192_uncultured bacterium	Not differential
LN568335.1.1316	4.48864	Proteobacteria	Alphaproteobacteria	Acetobacterales	Acetobacteraceae	#N/A	#N/A	0.000947368	RF1549	B7160_f_Acetobacteraceae	Non-fer
JN672436.1.1315	5.16479	Proteobacteria	Deltaproteobacteria	MBNT15	uncultured proteobacterium	uncultured proteobacterium	uncultured proteobacterium	0.000947368	RF1550	B1628_uncultured proteobacterium	Non-fer
JQ816930.1.1510	2.30259	Proteobacteria	Deltaproteobacteria	NKB15	#N/A	#N/A	#N/A	0.000947368	RF1551	B18404_o_NKB15	Not differential
EF019770.1.1379	4.23411	Bacteroidetes	Bacteroidia	Cytophagales	Microscillaceae	Chryseolinea	metagenome	0.000947368	RF1552	B9360_Chryseolinea	Not differential
9dfd3090404e43ec869e77a18d347f94	3.2581	Proteobacteria	Deltaproteobacteria	Oligoflexales	0319-6G20	marine metagenome	marine metagenome	0.000947368	RF1553	B9209_marine metagenome	Not differential
ce49d39b5dc02771c4b22203f4df4612	3.78419	Latescibacteria	Latescibacteria	Latescibacterales	Latescibacteraceae	metagenome	metagenome	0.000947368	RF1554	B11510_metagenome	Fer
22c173dd32a60e4bf452524bf390b54b	3.73767	Proteobacteria	Gammaproteobacteria	Xanthomonadales	Rhodanobacteraceae	Dokdonella	#N/A	0.000947368	RF1555	B7358_Dokdonella	Not differential
6b5fd922eb3e6b0c86325916e93cb7d3	5.25227	Chloroflexi	Anaerolineae	Anaerolineales	Anaerolineaceae	uncultured	#N/A	0.000947368	RF1556	B5248_uncultured	Not differential
HM780327.1.1466	3.78419	Proteobacteria	Alphaproteobacteria	Tistrellales	Geminicoccaceae	Candidatus Alysiosphaera	#N/A	0.000944444	RF1557	B6335_Candidatus Alysiosphaera	Non-fer
FJ004751.1.1321	5.2575	Acidobacteria	Acidobacteriia	Solibacterales	Solibacteraceae (Subgroup 3)	Bryobacter	#N/A	0.000944444	RF1558	B349_Bryobacter	Non-fer
EU135451.1.1397	5.88888	Verrucomicrobia	Verrucomicrobiae	Chthoniobacterales	Chthoniobacteraceae	Candidatus Udaeobacter	#N/A	0.000944444	RF1559	B312_Candidatus Udaeobacter	Not differential
EU881351.1.1521	4.67283	Latescibacteria	uncultured soil bacterium	uncultured soil bacterium	uncultured soil bacterium	uncultured soil bacterium	uncultured soil bacterium	0.000944444	RF1560	B3040_uncultured soil bacterium	Not differential
AB307635.1.1397	3.09104	Bacteroidetes	Bacteroidia	Bacteroidales	Paludibacteraceae	uncultured	uncultured soil bacterium	0.000944444	RF1561	B11276_uncultured	Fer
AB487631.1.1313	3.43399	Firmicutes	Clostridia	Clostridiales	Clostridiaceae 1	Fonticella	#N/A	0.000944444	RF1562	B5341_Fonticella	Fer
GU461280.1.1297	6.19441	Bacteroidetes	Bacteroidia	Flavobacteriales	Flavobacteriaceae	Flavobacterium	#N/A	0.000944444	RF1563	B2766_Flavobacterium	Not differential
361a5eb6d008699f9c46aa856b4e6517	3.21888	Omnitrophicaeota	Omnitrophia	Omnitrophales	Omnitrophaceae	Candidatus Omnitrophus	#N/A	0.000944444	RF1564	B14235_Candidatus Omnitrophus	Fer
6819d9501557d6bac4301f6bad1673eb	3.2581	Chloroflexi	Anaerolineae	Ardenticatenales	uncultured	uncultured prokaryote	uncultured prokaryote	0.000944444	RF1565	B10623_uncultured prokaryote	Fer
be269e010bef90c56e84c96f761d4b99	3.2581	Omnitrophicaeota	uncultured bacterium	uncultured bacterium	uncultured bacterium	uncultured bacterium	uncultured bacterium	0.000944444	RF1566	B14128_uncultured bacterium	Not differential
d76b5131d685564f5b2da08351875b2a	2.56495	Bacteroidetes	Bacteroidia	#N/A	#N/A	#N/A	#N/A	0.000944444	RF1567	B5949_o_NA	Not differential
275301be130ada87534306abf88172f5	3.7612	Kiritimatiellaeota	Kiritimatiellae	WCHB1-41	#N/A	#N/A	#N/A	0.000944444	RF1568	B9005_o_WCHB1-41	Fer
48010d663308151e171d8f97b6ec182f	2.07944	Patescibacteria	ABY1	Candidatus Magasanikbacteria	Candidatus Magasanikbacteria bacterium RIFOXYD1_FULL_40_23	Candidatus Magasanikbacteria bacterium RIFOXYD1_FULL_40_23	Candidatus Magasanikbacteria bacterium RIFOXYD1_FULL_40_23	0.000944444	RF1569	B13182_Candidatus Magasanikbacteria bacterium RIFOXYD1_FULL_40_23	Not differential
4e6a20424e2563696c998001be335e96	3.3673	Bacteroidetes	Bacteroidia	Sphingobacteriales	AKYH767	metagenome	metagenome	0.000944444	RF1570	B4118_metagenome	Not differential
2e09f134b947511bafa526b8dace90f3	3.66356	Planctomycetes	BD7-11	uncultured bacterium	uncultured bacterium	uncultured bacterium	uncultured bacterium	0.000944444	RF1571	B5148_uncultured bacterium	Not differential
80dd9a09429948bbe9947a23996afa9f	6.23441	Chloroflexi	Anaerolineae	Anaerolineales	Anaerolineaceae	Leptolinea	metagenome	0.000944444	RF1572	B473_Leptolinea	Non-fer
EU283383.1.1434	2.56495	Bacteroidetes	Bacteroidia	Chitinophagales	Saprospiraceae	uncultured	uncultured soil bacterium	0.000941176	RF1573	B17307_uncultured	Not differential
AJ518790.1.1309	3.4012	Proteobacteria	Deltaproteobacteria	Myxococcales	Sandaracinaceae	uncultured	uncultured delta proteobacterium	0.000941176	RF1574	B13387_uncultured	Not differential
AB672211.1.1438	2.19722	Armatimonadetes	Chthonomonadetes	Chthonomonadales	uncultured bacterium	uncultured bacterium	uncultured bacterium	0.000941176	RF1575	B13074_uncultured bacterium	Not differential
JF176932.1.1343	3.63759	Bacteroidetes	Bacteroidia	Cytophagales	Spirosomaceae	Larkinella	#N/A	0.000941176	RF1576	B7389_Larkinella	Non-fer
FJ538114.1.1488	4.80402	Acidobacteria	Blastocatellia (Subgroup 4)	Blastocatellales	Blastocatellaceae	JGI 0001001-H03	uncultured Acidobacterium sp.	0.000941176	RF1577	B1099_JGI 0001001-H03	Non-fer
FJ592886.1.1369	4.11087	Bacteroidetes	Ignavibacteria	OPB56	#N/A	#N/A	#N/A	0.000941176	RF1578	B2683_o_OPB56	Not differential
FQ659916.1.1346	4.89784	Firmicutes	Clostridia	Clostridiales	Ruminococcaceae	uncultured	uncultured soil bacterium	0.000941176	RF1579	B1859_uncultured	Fer
AB661602.1.1513	3.95124	Spirochaetes	Spirochaetia	Spirochaetales	Spirochaetaceae	M2PT2-76 termite group	uncultured bacterium	0.000941176	RF1580	B6795_M2PT2-76 termite group	Not differential
KU174196.1.1502	2.30259	Actinobacteria	Actinobacteria	Glycomycetales	Glycomycetaceae	Glycomyces	Glycomyces sp. UTMC 2460	0.000941176	RF1581	B18412_Glycomyces	Not differential
HQ729902.1.1453	5.43808	Acidobacteria	Acidobacteriia	Solibacterales	Solibacteraceae (Subgroup 3)	Candidatus Solibacter	#N/A	0.000941176	RF1582	B4679_Candidatus Solibacter	Fer
DQ404834.1.1541	6.63332	Proteobacteria	Deltaproteobacteria	Syntrophobacterales	Syntrophobacteraceae	Syntrophobacter	#N/A	0.000941176	RF1583	B71_Syntrophobacter	Not differential
JQ086774.1.1479	3.46574	Firmicutes	Negativicutes	Selenomonadales	Veillonellaceae	Sporomusa	#N/A	0.000941176	RF1584	B13144_Sporomusa	Not differential
AB672107.1.1459	5.26269	Proteobacteria	Gammaproteobacteria	Betaproteobacteriales	Nitrosomonadaceae	MND1	uncultured Rhodocyclaceae bacterium	0.000941176	RF1585	B801_MND1	Not differential
KM105788.1.1470	2.48491	Proteobacteria	Gammaproteobacteria	Coxiellales	Coxiellaceae	Coxiella	uncultured Legionellales bacterium	0.000941176	RF1586	B11341_Coxiella	Not differential
FJ802260.1.1216	4.89035	Chloroflexi	Anaerolineae	Anaerolineales	Anaerolineaceae	uncultured	#N/A	0.000941176	RF1587	B3338_uncultured	Not differential
AB488249.1.1356	4.67283	Proteobacteria	Deltaproteobacteria	Myxococcales	Archangiaceae	Anaeromyxobacter	uncultured bacterium	0.000941176	RF1588	B2990_Anaeromyxobacter	Not differential
HQ118308.1.1487	1.60944	Verrucomicrobia	Verrucomicrobiae	Verrucomicrobiales	Verrucomicrobiaceae	uncultured	#N/A	0.000941176	RF1589	B16432_uncultured	Not differential
319affa3c6604ed12d946ef7e36863dc	2.19722	Chloroflexi	Dehalococcoidia	#N/A	#N/A	#N/A	#N/A	0.000941176	RF1590	B12477_o_NA	Non-fer
73d0f5200612da06ca0ead2c33c91660	2.3979	Chloroflexi	Anaerolineae	SBR1031	#N/A	#N/A	#N/A	0.000941176	RF1591	B2574_o_SBR1031	Not differential
0d68fdaebc477d3954f1926de55bfd16	3.04452	Chloroflexi	Anaerolineae	SBR1031	uncultured soil bacterium	uncultured soil bacterium	uncultured soil bacterium	0.000941176	RF1592	B13647_uncultured soil bacterium	Not differential
b979c8d51aa78f405867e2a641521595	0.693147	#N/A	#N/A	#N/A	#N/A	#N/A	#N/A	0.000941176	RF1593	B22366_o_NA	Not differential
3b0f564617b73e73a206776247d80179	3.80666	Proteobacteria	Gammaproteobacteria	Diplorickettsiales	Diplorickettsiaceae	uncultured	#N/A	0.000941176	RF1594	B11361_uncultured	Not differential
5236996cd8cfd061c1c2cf7080a79ef6	3.7612	Bacteroidetes	Ignavibacteria	Ignavibacteriales	UA-50	#N/A	#N/A	0.000941176	RF1595	B8937_f_UA-50	Not differential
e59430fcc787fc27ccbdacfeaee034f7	3.58352	Planctomycetes	Phycisphaerae	Tepidisphaerales	WD2101 soil group	planctomycete WWH14	planctomycete WWH14	0.000941176	RF1596	B12552_planctomycete WWH14	Fer
d8cf113ab79115344ddcb4e4a1432be3	1.94591	#N/A	#N/A	#N/A	#N/A	#N/A	#N/A	0.000941176	RF1597	B7735_o_NA	Not differential
61bef6131c1d16fb33bbf0caf8cd6c44	4.34381	Nitrospinae	P9X2b3D02	#N/A	#N/A	#N/A	#N/A	0.000941176	RF1598	B8836_o_NA	Non-fer
2d3a4e805a624cb9411ed52e5c5ff643	3.2581	Planctomycetes	Phycisphaerae	Pla1 lineage	uncultured soil bacterium PBS-71	uncultured soil bacterium PBS-71	uncultured soil bacterium PBS-71	0.000941176	RF1599	B10679_uncultured soil bacterium PBS-71	Not differential
e8e7b7cd9be4391387ddfecf6d513a1b	5.0814	Proteobacteria	Deltaproteobacteria	Syntrophobacterales	Syntrophobacteraceae	Syntrophobacter	#N/A	0.000941176	RF1600	B5826_Syntrophobacter	Fer
07b1b7435e5f56948a2b76a8e59108da	2.07944	Proteobacteria	Deltaproteobacteria	Bdellovibrionales	Bdellovibrionaceae	Bdellovibrio	uncultured bacterium	0.000941176	RF1601	B17745_Bdellovibrio	Not differential
7a296921803e56f6e731ff32ca8974ed	3.29584	Proteobacteria	Deltaproteobacteria	Myxococcales	KD3-10	uncultured delta proteobacterium	uncultured delta proteobacterium	0.000941176	RF1602	B13910_uncultured delta proteobacterium	Fer
75e86d2bd52b50e1ae8242a939105d46	5.3799	Proteobacteria	Deltaproteobacteria	Deltaproteobacteria Incertae Sedis	Unknown Family	Deferrisoma	#N/A	0.000941176	RF1603	B1838_Deferrisoma	Not differential
a17134add5c271d7c4069fc43a38378b	1.94591	Chloroflexi	SHA-26	uncultured bacterium	uncultured bacterium	uncultured bacterium	uncultured bacterium	0.000941176	RF1604	B13211_uncultured bacterium	Not differential
53bd812a7cba76fd58f0a969f0abbabe	2.3979	FCPU426	uncultured bacterium	uncultured bacterium	uncultured bacterium	uncultured bacterium	uncultured bacterium	0.000941176	RF1605	B12887_uncultured bacterium	Not differential
b0200dc3b6649bacd43bb0bceffdbefb	5.07517	Verrucomicrobia	Verrucomicrobiae	Chthoniobacterales	Chthoniobacteraceae	#N/A	#N/A	0.000941176	RF1606	B2056_f_Chthoniobacteraceae	Fer
23a076bb8f4618f1f779057ffde2b0b4	2.19722	Proteobacteria	Gammaproteobacteria	Diplorickettsiales	Diplorickettsiaceae	uncultured	uncultured Coxiellaceae bacterium	0.000941176	RF1607	B18457_uncultured	Not differential
42beb58dc0d1e3f72360bb644e29de81	4.54329	Chloroflexi	Anaerolineae	RBG-13-54-9	uncultured Anaerolineaceae bacterium	uncultured Anaerolineaceae bacterium	uncultured Anaerolineaceae bacterium	0.000941176	RF1608	B2000_uncultured Anaerolineaceae bacterium	Not differential
8c0abce723470cf5fe4403d3fbe6d5f5	2.07944	Proteobacteria	Alphaproteobacteria	Azospirillales	Azospirillaceae	Azospirillum	#N/A	0.000941176	RF1609	B18991_Azospirillum	Not differential
AY963371.1.1424	4.64439	Acidobacteria	Acidobacteriia	Acidobacteriales	uncultured	#N/A	#N/A	0.0009375	RF1610	B859_f_uncultured	Not differential
FPLS01025218.13.1516	4.57471	Bacteroidetes	Bacteroidia	Cytophagales	Microscillaceae	uncultured	#N/A	0.0009375	RF1611	B1685_uncultured	Not differential
JQ769827.1.1451	4.68213	Cyanobacteria	Oxyphotobacteria	Leptolyngbyales	Leptolyngbyaceae	Arthronema SAG 12.89	uncultured bacterium	0.0009375	RF1612	B5773_Arthronema SAG 12.89	Non-fer
GQ397052.1.1443	6.1506	Chloroflexi	Chloroflexia	Chloroflexales	Roseiflexaceae	uncultured	uncultured Chloroflexaceae bacterium	0.0009375	RF1613	B789_uncultured	Fer
AJ292606.1.1452	3.43399	Proteobacteria	Alphaproteobacteria	Acetobacterales	Acetobacteraceae	uncultured	uncultured eubacterium WD295	0.0009375	RF1614	B6984_uncultured	Not differential
EU135520.1.1257	1.09861	Verrucomicrobia	Verrucomicrobiae	Chthoniobacterales	Xiphinematobacteraceae	Candidatus Xiphinematobacter	#N/A	0.0009375	RF1615	B21776_Candidatus Xiphinematobacter	Not differential
KU667231.1.1472	5.84354	Actinobacteria	Coriobacteriia	OPB41	uncultured soil bacterium	uncultured soil bacterium	uncultured soil bacterium	0.0009375	RF1616	B3247_uncultured soil bacterium	Not differential
EF516015.1.1421	4.62497	Acidobacteria	Acidobacteriia	Acidobacteriales	uncultured	uncultured forest soil bacterium	uncultured forest soil bacterium	0.0009375	RF1617	B7609_uncultured forest soil bacterium	Non-fer
LN870938.1.1437	4.77068	Kiritimatiellaeota	Kiritimatiellae	WCHB1-41	uncultured soil bacterium PBS-III-20	uncultured soil bacterium PBS-III-20	uncultured soil bacterium PBS-III-20	0.0009375	RF1618	B2364_uncultured soil bacterium PBS-III-20	Fer
FN421523.1.1393	4.38203	Bacteroidetes	Bacteroidia	Cytophagales	Spirosomaceae	Dyadobacter	#N/A	0.0009375	RF1619	B8682_Dyadobacter	Fer
HM269773.1.1367	3.61092	Elusimicrobia	Lineage IIa	#N/A	#N/A	#N/A	#N/A	0.0009375	RF1620	B12436_o_NA	Not differential
AB748636.1.1480	6.00881	Proteobacteria	Deltaproteobacteria	Desulfuromonadales	Geobacteraceae	Geobacter	#N/A	0.0009375	RF1621	B1265_Geobacter	Non-fer
JQ087045.1.1454	1.38629	Firmicutes	Clostridia	Clostridiales	Peptococcaceae	Thermincola	uncultured Thermincola sp.	0.0009375	RF1622	B13286_Thermincola	Not differential
AB630795.1.1445	0.693147	Bacteroidetes	Bacteroidia	Bacteroidales	Paludibacteraceae	uncultured	uncultured soil bacterium	0.0009375	RF1623	B11850_uncultured	Not differential
KM200373.1.1452	5.74939	Acidobacteria	Acidobacteriia	Solibacterales	Solibacteraceae (Subgroup 3)	Candidatus Solibacter	#N/A	0.0009375	RF1624	B2274_Candidatus Solibacter	Not differential
KM021173.1.1262	4.18965	Bacteroidetes	Bacteroidia	Flavobacteriales	Flavobacteriaceae	Flavobacterium	#N/A	0.0009375	RF1625	B9587_Flavobacterium	Non-fer
KC463802.1.1233	1.60944	Proteobacteria	Gammaproteobacteria	Pseudomonadales	Moraxellaceae	Acinetobacter	#N/A	0.0009375	RF1626	B20583_Acinetobacter	Not differential
JN398099.1.1418	3.17805	Cyanobacteria	Oxyphotobacteria	Nostocales	Coleofasciculaceae	uncultured	uncultured bacterium	0.0009375	RF1627	B14567_uncultured	Not differential
GU444087.1.1518	1.79176	Proteobacteria	Deltaproteobacteria	Oligoflexales	0319-6G20	uncultured gamma proteobacterium	uncultured gamma proteobacterium	0.0009375	RF1628	B11203_uncultured gamma proteobacterium	Not differential
DQ128348.1.1318	2.30259	Proteobacteria	Alphaproteobacteria	Rhodospirillales	uncultured	uncultured soil bacterium	uncultured soil bacterium	0.0009375	RF1629	B10385_uncultured soil bacterium	Not differential
JX222346.1.1490	4.67283	Proteobacteria	Gammaproteobacteria	Betaproteobacteriales	Burkholderiaceae	Noviherbaspirillum	#N/A	0.0009375	RF1630	B7396_Noviherbaspirillum	Non-fer
AX153761.1.1300	4.90527	Proteobacteria	Deltaproteobacteria	MBNT15	unidentified	unidentified	unidentified	0.0009375	RF1631	B6485_unidentified	Not differential
EU431675.1.1517	3.91202	Proteobacteria	Deltaproteobacteria	Myxococcales	mle1-27	Myxococcales bacterium Gsoil 473	Myxococcales bacterium Gsoil 473	0.0009375	RF1632	B10906_Myxococcales bacterium Gsoil 473	Fer
JF775609.1.1523	3.80666	Proteobacteria	Deltaproteobacteria	NB1-j	#N/A	#N/A	#N/A	0.0009375	RF1633	B3379_o_NB1-j	Not differential
JX114451.1.1479	4.58497	Acidobacteria	Blastocatellia (Subgroup 4)	Blastocatellales	Blastocatellaceae	#N/A	#N/A	0.0009375	RF1634	B572_f_Blastocatellaceae	Non-fer
JN626516.1.1334	4.77068	Actinobacteria	Actinobacteria	Frankiales	Sporichthyaceae	#N/A	#N/A	0.0009375	RF1635	B4827_f_Sporichthyaceae	Non-fer
FJ810564.1.1474	2.07944	Bacteroidetes	Bacteroidia	Chitinophagales	Saprospiraceae	uncultured	uncultured soil bacterium	0.0009375	RF1636	B19142_uncultured	Fer
FPLS01009498.15.1476	5.00395	Proteobacteria	Alphaproteobacteria	Caulobacterales	Caulobacteraceae	Phenylobacterium	#N/A	0.0009375	RF1637	B1345_Phenylobacterium	Non-fer
LN572444.1.1333	2.70805	Proteobacteria	Alphaproteobacteria	Elsterales	uncultured	uncultured soil bacterium	uncultured soil bacterium	0.0009375	RF1638	B4143_uncultured soil bacterium	Not differential
HE804134.1.1391	1.09861	Bacteroidetes	Bacteroidia	Sphingobacteriales	NS11-12 marine group	uncultured bacterium	uncultured bacterium	0.0009375	RF1639	B21834_uncultured bacterium	Not differential
4d3b40631e36e73db3b08940b7e4c187	2.3979	Proteobacteria	Deltaproteobacteria	Oligoflexales	0319-6G20	uncultured bacterium	uncultured bacterium	0.0009375	RF1640	B6977_uncultured bacterium	Not differential
443bb1d252f9a9492309b6c7cc7f8bb7	4.95583	Planctomycetes	Phycisphaerae	MSBL9	SG8-4	#N/A	#N/A	0.0009375	RF1641	B1251_f_SG8-4	Fer
9bcd23237f6be889919dd50b7dae85ef	3.89182	Planctomycetes	Phycisphaerae	MSBL9	GWC2-45-44	uncultured soil bacterium	uncultured soil bacterium	0.0009375	RF1642	B10108_uncultured soil bacterium	Not differential
5f7edd1db8f5c67c866bd893ed19ce75	5.16479	Acidobacteria	Subgroup 18	#N/A	#N/A	#N/A	#N/A	0.0009375	RF1643	B1785_o_NA	Fer
6844f9f266f1bc749339fa2aac103458	2.83321	Chloroflexi	Anaerolineae	SBR1031	uncultured Gemmatimonadetes bacterium	uncultured Gemmatimonadetes bacterium	uncultured Gemmatimonadetes bacterium	0.0009375	RF1644	B4409_uncultured Gemmatimonadetes bacterium	Not differential
1fe2c0a4ae90f97eacedf6a6071694f7	3.73767	Chlamydiae	Chlamydiae	Chlamydiales	Parachlamydiaceae	#N/A	#N/A	0.0009375	RF1645	B11687_f_Parachlamydiaceae	Not differential
f54ef033c530da72c0e7270ab4a1a24b	3.95124	Proteobacteria	Deltaproteobacteria	Bdellovibrionales	Bdellovibrionaceae	Bdellovibrio	Bdellovibrionales bacterium RIFCSPHIGHO2_01_FULL_40_29	0.0009375	RF1646	B10740_Bdellovibrio	Not differential
ca2f1f59132099c34d7bea540d9338a2	3.04452	Fibrobacteres	Fibrobacteria	Fibrobacterales	#N/A	#N/A	#N/A	0.0009375	RF1647	B13097_o_Fibrobacterales	Not differential
8ff954c0cb9d585d7d0eecf731f431f2	5.7462	Actinobacteria	Coriobacteriia	FS118-23B-02	uncultured bacterium	uncultured bacterium	uncultured bacterium	0.0009375	RF1648	B1614_uncultured bacterium	Not differential
41bd154607a3d5488ab9260456aa5426	2.89037	Chloroflexi	Anaerolineae	RBG-13-54-9	uncultured bacterium UASB_TL14	uncultured bacterium UASB_TL14	uncultured bacterium UASB_TL14	0.0009375	RF1649	B10685_uncultured bacterium UASB_TL14	Non-fer
95ee317b671a84e1bf43281a05759993	3.49651	Proteobacteria	Gammaproteobacteria	Coxiellales	Coxiellaceae	Coxiella	#N/A	0.0009375	RF1650	B4595_Coxiella	Not differential
b5b3668293b83b4168a5beadc09da4cc	2.99573	Bacteroidetes	Bacteroidia	Flavobacteriales	Flavobacteriaceae	Flavobacterium	#N/A	0.0009375	RF1651	B15371_Flavobacterium	Not differential
bdbf4a0106aef909beb93ce810248d21	2.30259	Verrucomicrobia	Verrucomicrobiae	S-BQ2-57 soil group	metagenome	metagenome	metagenome	0.0009375	RF1652	B12262_metagenome	Not differential
0f28a5ab2bc7900239034fbc8303d307	1.60944	Patescibacteria	Berkelbacteria	uncultured bacterium	uncultured bacterium	uncultured bacterium	uncultured bacterium	0.0009375	RF1653	B18114_uncultured bacterium	Not differential
247165d7b7c1f5aa85b79026cc463276	1.38629	Patescibacteria	Berkelbacteria	uncultured bacterium	uncultured bacterium	uncultured bacterium	uncultured bacterium	0.0009375	RF1654	B20675_uncultured bacterium	Not differential
bada0b5d6e4831e3758737e8241c9fec	3.89182	Armatimonadetes	Chthonomonadetes	Chthonomonadales	uncultured Armatimonadetes bacterium	uncultured Armatimonadetes bacterium	uncultured Armatimonadetes bacterium	0.0009375	RF1655	B8847_uncultured Armatimonadetes bacterium	Not differential
3ecfe2463319d56f3db284c882da99ff	3.8712	Proteobacteria	Gammaproteobacteria	Gammaproteobacteria Incertae Sedis	Unknown Family	Candidatus Ovatusbacter	#N/A	0.0009375	RF1656	B3786_Candidatus Ovatusbacter	Not differential
c678aa2679832e3524d7133e97b89e17	3.29584	#N/A	#N/A	#N/A	#N/A	#N/A	#N/A	0.0009375	RF1657	B6300_o_NA	Non-fer
431d5595cffefcbf0b18ab5783b4c36c	3.21888	Elusimicrobia	Lineage IIb	metagenome	metagenome	metagenome	metagenome	0.0009375	RF1658	B7259_metagenome	Non-fer
68b6043dad39de1b6a8839932b475114	3.55535	Elusimicrobia	Endomicrobia	Endomicrobiales	Endomicrobiaceae	Candidatus Endomicrobium	metagenome	0.0009375	RF1659	B8940_Candidatus Endomicrobium	Not differential
2b780274f0b65d6df39957c81ed088d1	1.94591	Proteobacteria	Deltaproteobacteria	#N/A	#N/A	#N/A	#N/A	0.0009375	RF1660	B19244_o_NA	Not differential
8a07709227451ee67ce86f24f685635c	1.38629	#N/A	#N/A	#N/A	#N/A	#N/A	#N/A	0.0009375	RF1661	B20898_o_NA	Not differential
06140d30cc6b7e74d212b9ed304c6040	4.79579	Proteobacteria	Gammaproteobacteria	Diplorickettsiales	Diplorickettsiaceae	Aquicella	uncultured Aquicella sp.	0.0009375	RF1662	B6870_Aquicella	Fer
ccb01d564723195ec8b2646df6e9d0f1	2.48491	Verrucomicrobia	Verrucomicrobiae	S-BQ2-57 soil group	uncultured bacterium	uncultured bacterium	uncultured bacterium	0.0009375	RF1663	B9712_uncultured bacterium	Not differential
cce9bb61677e630b13651076a5a683de	3.3322	Elusimicrobia	Lineage IIb	uncultured bacterium	uncultured bacterium	uncultured bacterium	uncultured bacterium	0.0009375	RF1664	B4177_uncultured bacterium	Fer
5d7c0ca150c32fbb449863b7b3d8106e	2.77259	Cyanobacteria	Oxyphotobacteria	Phormidesmiales	Nodosilineaceae	uncultured	uncultured cyanobacterium	0.0009375	RF1665	B16281_uncultured	Not differential
7290e70097861b2b72df0998e9f1a21f	2.77259	Chloroflexi	Chloroflexia	Kallotenuales	AKIW781	uncultured soil bacterium	uncultured soil bacterium	0.0009375	RF1666	B5756_uncultured soil bacterium	Not differential
660b7d78d8eda2976eced89d4463bce8	4.12713	Proteobacteria	Deltaproteobacteria	Myxococcales	#N/A	#N/A	#N/A	0.0009375	RF1667	B9847_o_Myxococcales	Not differential
db3775fc31a123ea628a55caf08ca01a	3.58352	Bacteroidetes	Ignavibacteria	#N/A	#N/A	#N/A	#N/A	0.0009375	RF1668	B3185_o_NA	Fer
879df4da418e038411db437b209f0a42	5.20949	Actinobacteria	MB-A2-108	#N/A	#N/A	#N/A	#N/A	0.0009375	RF1669	B1717_o_NA	Fer
JF174990.1.1366	3.66356	Actinobacteria	Thermoleophilia	Solirubrobacterales	Solirubrobacteraceae	Solirubrobacter	#N/A	0.000933333	RF1670	B4814_Solirubrobacter	Not differential
HM440304.1.1418	7.12609	Chloroflexi	Anaerolineae	SJA-15	metagenome	metagenome	metagenome	0.000933333	RF1671	B189_metagenome	Fer
JX431979.1.1396	4.36945	Proteobacteria	Alphaproteobacteria	Rhodospirillales	Rhodopirillaceae	Defluviicoccus	metagenome	0.000933333	RF1672	B7940_Defluviicoccus	Not differential
FQ659752.1.1370	7.49721	Acidobacteria	Subgroup 17	uncultured prokaryote	uncultured prokaryote	uncultured prokaryote	uncultured prokaryote	0.000933333	RF1673	B108_uncultured prokaryote	Fer
AB487539.1.1349	6.09807	Firmicutes	Clostridia	Clostridiales	Heliobacteriaceae	Hydrogenispora	#N/A	0.000933333	RF1674	B911_Hydrogenispora	Not differential
LN572102.1.1323	3.43399	Proteobacteria	Alphaproteobacteria	uncultured	bacterium enrichment culture clone Anammox_49	bacterium enrichment culture clone Anammox_49	bacterium enrichment culture clone Anammox_49	0.000933333	RF1675	B10849_bacterium enrichment culture clone Anammox_49	Not differential
KT002250.1.1464	2.3979	Firmicutes	Clostridia	Clostridiales	Peptostreptococcaceae	#N/A	#N/A	0.000933333	RF1676	B18097_f_Peptostreptococcaceae	Not differential
HM262900.1.1369	3.63759	Verrucomicrobia	Verrucomicrobiae	Verrucomicrobiales	Verrucomicrobiaceae	uncultured	uncultured Verrucomicrobia bacterium	0.000933333	RF1677	B9810_uncultured	Not differential
EU132743.1.1303	4.94164	Actinobacteria	Actinobacteria	Corynebacteriales	Mycobacteriaceae	Mycobacterium	#N/A	0.000933333	RF1678	B6358_Mycobacterium	Non-fer
AB426195.1.1408	6.04025	Proteobacteria	Deltaproteobacteria	Syntrophobacterales	Syntrophaceae	Desulfobacca	#N/A	0.000933333	RF1679	B466_Desulfobacca	Not differential
GU444065.1.1526	3.21888	Rokubacteria	NC10	Rokubacteriales	uncultured candidate division SPAM bacterium	uncultured candidate division SPAM bacterium	uncultured candidate division SPAM bacterium	0.000933333	RF1680	B14372_uncultured candidate division SPAM bacterium	Not differential
FJ946566.1.1290	1.09861	Proteobacteria	Gammaproteobacteria	Betaproteobacteriales	Neisseriaceae	uncultured	uncultured beta proteobacterium	0.000933333	RF1681	B20023_uncultured	Not differential
DQ404689.1.1545	4.8752	Verrucomicrobia	Verrucomicrobiae	Chthoniobacterales	Chthoniobacteraceae	Candidatus Udaeobacter	uncultured soil bacterium	0.000933333	RF1682	B861_Candidatus Udaeobacter	Fer
EU431779.1.1483	2.70805	Patescibacteria	Saccharimonadia	Saccharimonadales	uncultured gamma proteobacterium	uncultured gamma proteobacterium	uncultured gamma proteobacterium	0.000933333	RF1683	B16709_uncultured gamma proteobacterium	Not differential
FPLS01050380.13.1518	4.04305	Proteobacteria	Deltaproteobacteria	Myxococcales	Sandaracinaceae	uncultured	uncultured soil bacterium	0.000933333	RF1684	B10307_uncultured	Not differential
FJ802323.1.1211	2.56495	Firmicutes	Clostridia	Clostridiales	Ruminococcaceae	uncultured	#N/A	0.000933333	RF1685	B17326_uncultured	Not differential
JX098431.1.1330	3.68888	Chloroflexi	JG30-KF-CM66	uncultured bacterium	uncultured bacterium	uncultured bacterium	uncultured bacterium	0.000933333	RF1686	B2260_uncultured bacterium	Fer
JF951735.1.1403	3.66356	Bacteroidetes	Bacteroidia	Flavobacteriales	Weeksellaceae	Chryseobacterium	#N/A	0.000933333	RF1687	B7484_Chryseobacterium	Not differential
HQ119025.1.1432	5.90536	Proteobacteria	Alphaproteobacteria	Rhizobiales	Xanthobacteraceae	Pseudolabrys	#N/A	0.000933333	RF1688	B140_Pseudolabrys	Not differential
KF712847.1.1506	2.07944	Verrucomicrobia	Verrucomicrobiae	Verrucomicrobiales	Verrucomicrobiaceae	uncultured	uncultured bacterium	0.000933333	RF1689	B12729_uncultured	Not differential
FPLS01039234.11.1486	2.83321	Chloroflexi	Anaerolineae	SBR1031	A4b	metagenome	metagenome	0.000933333	RF1690	B10229_metagenome	Fer
FJ889304.1.1453	2.77259	Proteobacteria	Alphaproteobacteria	uncultured	uncultured Acetobacteraceae bacterium	uncultured Acetobacteraceae bacterium	uncultured Acetobacteraceae bacterium	0.000933333	RF1691	B14749_uncultured Acetobacteraceae bacterium	Not differential
HQ397138.1.1450	4.33073	Chloroflexi	JG30-KF-CM66	uncultured bacterium	uncultured bacterium	uncultured bacterium	uncultured bacterium	0.000933333	RF1692	B6583_uncultured bacterium	Fer
KC541007.1.1550	4.8752	Acidobacteria	Thermoanaerobaculia	Thermoanaerobaculales	Thermoanaerobaculaceae	Subgroup 10	#N/A	0.000933333	RF1693	B4026_Subgroup 10	Fer
JQ771967.1.1225	4.51086	Bacteroidetes	Bacteroidia	Cytophagales	Microscillaceae	#N/A	#N/A	0.000933333	RF1694	B3522_f_Microscillaceae	Fer
FPLP01004071.2.1405	3.17805	Bacteroidetes	Bacteroidia	Flavobacteriales	NS9 marine group	metagenome	metagenome	0.000933333	RF1695	B14179_metagenome	Fer
KR095274.1.1486	5.75257	Bacteroidetes	Bacteroidia	Bacteroidales	Bacteroidetes vadinHA17	uncultured Cytophagales bacterium	uncultured Cytophagales bacterium	0.000933333	RF1696	B773_uncultured Cytophagales bacterium	Fer
JF241419.1.1384	2.07944	Planctomycetes	BD7-11	uncultured bacterium	uncultured bacterium	uncultured bacterium	uncultured bacterium	0.000933333	RF1697	B16440_uncultured bacterium	Not differential
AY963428.1.1458	5.49717	Acidobacteria	Acidobacteriia	Subgroup 2	#N/A	#N/A	#N/A	0.000933333	RF1698	B4421_o_Subgroup 2	Not differential
KJ782237.1.1528	5.743	Proteobacteria	Deltaproteobacteria	#N/A	#N/A	#N/A	#N/A	0.000933333	RF1699	B809_o_NA	Not differential
GQ889425.1.1367	3.63759	Planctomycetes	Planctomycetacia	Gemmatales	Gemmataceae	Gemmata	Gemmata sp. Br1-1	0.000933333	RF1700	B7438_Gemmata	Fer
HQ178929.1.1481	5.02388	Proteobacteria	Deltaproteobacteria	Desulfuromonadales	Geobacteraceae	Geobacter	#N/A	0.000933333	RF1701	B4161_Geobacter	Not differential
FPLP01012765.16.1398	3.09104	Verrucomicrobia	Verrucomicrobiae	Pedosphaerales	Pedosphaeraceae	#N/A	#N/A	0.000933333	RF1702	B10822_f_Pedosphaeraceae	Not differential
JN672562.1.1262	2.77259	Chloroflexi	Anaerolineae	SBR1031	A4b	uncultured sludge bacterium H8	uncultured sludge bacterium H8	0.000933333	RF1703	B16450_uncultured sludge bacterium H8	Not differential
FQ659408.1.1320	5.42495	Acidobacteria	Acidobacteriia	Solibacterales	Solibacteraceae (Subgroup 3)	Candidatus Solibacter	#N/A	0.000933333	RF1704	B1956_Candidatus Solibacter	Not differential
JN656898.1.1478	3.04452	Bacteroidetes	Bacteroidia	Bacteroidales	Prolixibacteraceae	BSV13	#N/A	0.000933333	RF1705	B10160_BSV13	Not differential
KF287738.1.1498	5.66296	Proteobacteria	Gammaproteobacteria	Betaproteobacteriales	Nitrosomonadaceae	MND1	Thiobacter sp. enrichment culture clone 35Fe79	0.000933333	RF1706	B2736_MND1	Not differential
JQ723670.1.1499	4.43082	Proteobacteria	Gammaproteobacteria	Betaproteobacteriales	Rhodocyclaceae	uncultured	uncultured Sulfuritalea sp.	0.000933333	RF1707	B5933_uncultured	Not differential
KJ782244.1.1479	3.8712	Gemmatimonadetes	Gemmatimonadetes	Gemmatimonadales	Gemmatimonadaceae	uncultured	uncultured Nitrospira sp.	0.000933333	RF1708	B5356_uncultured	Not differential
KJ192026.1.1529	3.52636	Proteobacteria	Deltaproteobacteria	RCP2-54	uncultured Syntrophobacterales bacterium	uncultured Syntrophobacterales bacterium	uncultured Syntrophobacterales bacterium	0.000933333	RF1709	B1693_uncultured Syntrophobacterales bacterium	Not differential
HM243874.1.1530	4.57471	Proteobacteria	Gammaproteobacteria	Coxiellales	Coxiellaceae	Coxiella	uncultured bacterium UASB_TL22	0.000933333	RF1710	B3736_Coxiella	Fer
ad9b5c2b1cff782e5af38d40907745f4	1.38629	Proteobacteria	Deltaproteobacteria	SAR324 clade(Marine group B)	#N/A	#N/A	#N/A	0.000933333	RF1711	B19033_o_SAR324 clade(Marine group B)	Not differential
3c95b155e45b9e1bcd58528b578c6d8d	5.33754	Chloroflexi	OLB14	uncultured Chloroflexi bacterium	uncultured Chloroflexi bacterium	uncultured Chloroflexi bacterium	uncultured Chloroflexi bacterium	0.000933333	RF1712	B1178_uncultured Chloroflexi bacterium	Not differential
6ff2546e96017dcddc5b4b16eb65c760	1.38629	Gemmatimonadetes	Gemmatimonadetes	Gemmatimonadales	Gemmatimonadaceae	Gemmatimonas	uncultured Gemmatimonadetes bacterium	0.000933333	RF1713	B20834_Gemmatimonas	Not differential
e0fbc074e953e07b76f25bcedcf17a82	2.19722	Chloroflexi	Dehalococcoidia	GIF9	uncultured bacterium	uncultured bacterium	uncultured bacterium	0.000933333	RF1714	B18720_uncultured bacterium	Not differential
0729d30e27b4677eb7deafb75106d0e1	2.48491	Acidobacteria	Thermoanaerobaculia	Thermoanaerobaculales	Thermoanaerobaculaceae	TPD-58	uncultured bacterium	0.000933333	RF1715	B7043_TPD-58	Non-fer
ae06758a249a9bc5eb24aa78122d2b17	3.4012	Chloroflexi	Anaerolineae	SBR1031	uncultured soil bacterium	uncultured soil bacterium	uncultured soil bacterium	0.000933333	RF1716	B6270_uncultured soil bacterium	Non-fer
e8358596ed8264b98ac7e2fb8a2e6ad9	3.71357	Omnitrophicaeota	Omnitrophia	Omnitrophales	Omnitrophaceae	Candidatus Omnitrophus	uncultured prokaryote	0.000933333	RF1717	B3724_Candidatus Omnitrophus	Fer
fadc1e412a19b53c585e065960db9052	4.64439	Proteobacteria	Deltaproteobacteria	Deltaproteobacteria Incertae Sedis	Unknown Family	Deferrisoma	uncultured delta proteobacterium	0.000933333	RF1718	B1786_Deferrisoma	Not differential
38106b91b95778c80413ed9c7b9b111f	4.14313	Spirochaetes	Spirochaetia	Spirochaetales	Spirochaetaceae	Spirochaeta 2	uncultured bacterium	0.000933333	RF1719	B9763_Spirochaeta 2	Not differential
5b2a6076655b8b9cc873a6b9db51d39c	4.31749	Planctomycetes	Planctomycetacia	Gemmatales	Gemmataceae	uncultured	#N/A	0.000933333	RF1720	B5466_uncultured	Non-fer
7cdfddf811579fe2ddbc133014e8e6ee	1.38629	Chlamydiae	Chlamydiae	Chlamydiales	Parachlamydiaceae	Neochlamydia	#N/A	0.000933333	RF1721	B20868_Neochlamydia	Not differential
4760a11753de7add4657a2c1cf12728d	1.94591	Dependentiae	Babeliae	Babeliales	#N/A	#N/A	#N/A	0.000933333	RF1722	B19279_o_Babeliales	Not differential
0f7d9c0d1615cbd2fd8287f837cd968f	1.60944	Spirochaetes	MVP-15	#N/A	#N/A	#N/A	#N/A	0.000933333	RF1723	B20099_o_NA	Not differential
fa085ee9bde88e562775dc6c7856636e	3.3322	Proteobacteria	Gammaproteobacteria	Gammaproteobacteria Incertae Sedis	Unknown Family	#N/A	#N/A	0.000933333	RF1724	B8678_f_Unknown Family	Non-fer
8ce1102e773f07528bac2f6786dbe42c	2.56495	Halanaerobiaeota	Halanaerobiia	Halanaerobiales	Halobacteroidaceae	uncultured	#N/A	0.000933333	RF1725	B17184_uncultured	Not differential
64529daa8865102f531b17fff6c5d78b	2.30259	Armatimonadetes	uncultured	#N/A	#N/A	#N/A	#N/A	0.000933333	RF1726	B18202_o_NA	Not differential
65a36bf54ba5e47b6a3b07ae41b2243b	1.38629	Chlamydiae	Chlamydiae	Chlamydiales	#N/A	#N/A	#N/A	0.000933333	RF1727	B20807_o_Chlamydiales	Not differential
84f1351a51b8eb70602a4b4f32135662	3.55535	Chloroflexi	#N/A	#N/A	#N/A	#N/A	#N/A	0.000933333	RF1728	B3290_o_NA	Not differential
ab10499f6353300c5f74618a58681b54	4.06044	Proteobacteria	Deltaproteobacteria	Myxococcales	Phaselicystidaceae	Phaselicystis	#N/A	0.000933333	RF1729	B3511_Phaselicystis	Not differential
bfd45c3aa4ec3ca3099b961d941ab04d	1.09861	Proteobacteria	Deltaproteobacteria	Myxococcales	Haliangiaceae	Haliangium	#N/A	0.000933333	RF1730	B21654_Haliangium	Not differential
ccc4dfbed9e52f03cb60a772576b7340	4.14313	Proteobacteria	Alphaproteobacteria	Elsterales	uncultured	#N/A	#N/A	0.000933333	RF1731	B9788_f_uncultured	Non-fer
b8f660f4d9b802244a7028fab665e3fc	4.76217	Chloroflexi	Anaerolineae	Anaerolineales	Anaerolineaceae	Anaerolinea	#N/A	0.000933333	RF1732	B7020_Anaerolinea	Non-fer
f1db40ce0b91ac6afa3a4a2fa07e92f3	1.09861	Elusimicrobia	Lineage IIc	Elusimicrobia bacterium RIFCSPHIGHO2_02_FULL_39_36	Elusimicrobia bacterium RIFCSPHIGHO2_02_FULL_39_36	Elusimicrobia bacterium RIFCSPHIGHO2_02_FULL_39_36	Elusimicrobia bacterium RIFCSPHIGHO2_02_FULL_39_36	0.000933333	RF1733	B8591_Elusimicrobia bacterium RIFCSPHIGHO2_02_FULL_39_36	Not differential
59f7cf0d670cfa06088cbc113d3122da	2.99573	Verrucomicrobia	Verrucomicrobiae	Pedosphaerales	Pedosphaeraceae	Verrucomicrobia bacterium ADurb.Bin118	Verrucomicrobia bacterium ADurb.Bin118	0.000933333	RF1734	B15292_Verrucomicrobia bacterium ADurb.Bin118	Not differential
8dc6b7eebe3af575439bc59fb532a26c	0.693147	Omnitrophicaeota	uncultured bacterium	uncultured bacterium	uncultured bacterium	uncultured bacterium	uncultured bacterium	0.000933333	RF1735	B20313_uncultured bacterium	Not differential
8744637370be7e3ba33c649d66710149	4.49981	#N/A	#N/A	#N/A	#N/A	#N/A	#N/A	0.000933333	RF1736	B4659_o_NA	Fer
7eb80a1de4ff36f8af9e0c2150db6b32	5.9162	Chloroflexi	OLB14	metagenome	metagenome	metagenome	metagenome	0.000933333	RF1737	B1597_metagenome	Not differential
037b713fd93d1d075df1499453e51b93	1.38629	Firmicutes	Clostridia	#N/A	#N/A	#N/A	#N/A	0.000933333	RF1738	B20608_o_NA	Not differential
282fdd5f99c33ec1ad729f92e11049b6	1.79176	Patescibacteria	Gracilibacteria	uncultured bacterium	uncultured bacterium	uncultured bacterium	uncultured bacterium	0.000933333	RF1739	B18465_uncultured bacterium	Not differential
a6381535e9481d27127c24a410d1cabc	2.30259	Armatimonadetes	#N/A	#N/A	#N/A	#N/A	#N/A	0.000933333	RF1740	B10282_o_NA	Not differential
LC124775.1.1467	2.70805	Dependentiae	Babeliae	Babeliales	uncultured bacterium	uncultured bacterium	uncultured bacterium	0.000928571	RF1741	B12201_uncultured bacterium	Not differential
JQ627403.1.1333	8.24407	Proteobacteria	Gammaproteobacteria	Betaproteobacteriales	Burkholderiaceae	#N/A	#N/A	0.000928571	RF1742	B278_f_Burkholderiaceae	Not differential
JN038869.1.1519	4.64439	Nitrospinae	P9X2b3D02	uncultured prokaryote	uncultured prokaryote	uncultured prokaryote	uncultured prokaryote	0.000928571	RF1743	B7531_uncultured prokaryote	Not differential
KF712855.1.1504	5.31812	Nitrospirae	Nitrospira	Nitrospirales	Nitrospiraceae	Nitrospira	#N/A	0.000928571	RF1744	B2311_Nitrospira	Not differential
FPLM01006560.16.1520	4.99721	Actinobacteria	Acidimicrobiia	Microtrichales	Ilumatobacteraceae	uncultured	metagenome	0.000928571	RF1745	B2576_uncultured	Non-fer
DQ228377.1.1481	3.89182	Acidobacteria	Holophagae	Subgroup 7	#N/A	#N/A	#N/A	0.000928571	RF1746	B7974_o_Subgroup 7	Not differential
JF181627.1.1305	2.89037	Proteobacteria	Alphaproteobacteria	Rhizobiales	Rhodomicrobiaceae	Rhodomicrobium	#N/A	0.000928571	RF1747	B2215_Rhodomicrobium	Not differential
JQ978845.1.1460	2.3979	Chloroflexi	Chloroflexia	Thermomicrobiales	JG30-KF-CM45	uncultured bacterium	uncultured bacterium	0.000928571	RF1748	B18084_uncultured bacterium	Not differential
FJ269084.1.1478	5.90536	Actinobacteria	Coriobacteriia	OPB41	uncultured soil bacterium	uncultured soil bacterium	uncultured soil bacterium	0.000928571	RF1749	B3477_uncultured soil bacterium	Not differential
FPLS01008969.8.1534	7.43956	Bacteroidetes	Bacteroidia	Chitinophagales	Saprospiraceae	Phaeodactylibacter	uncultured Haliscomenobacter sp.	0.000928571	RF1750	B811_Phaeodactylibacter	Fer
FJ236056.1.1500	2.63906	Planctomycetes	Planctomycetacia	Planctomycetales	uncultured	uncultured Planctomyces sp.	uncultured Planctomyces sp.	0.000928571	RF1751	B17017_uncultured Planctomyces sp.	Not differential
AJ229213.1.1465	4.04305	Verrucomicrobia	Verrucomicrobiae	Opitutales	Opitutaceae	Opitutus	#N/A	0.000928571	RF1752	B3427_Opitutus	Not differential
AB672270.1.1457	5.78074	Acidobacteria	Acidobacteriia	Subgroup 13	#N/A	#N/A	#N/A	0.000928571	RF1753	B539_o_Subgroup 13	Not differential
HQ120490.1.1324	5.04343	Proteobacteria	Alphaproteobacteria	Sphingomonadales	Sphingomonadaceae	Sphingomonas	#N/A	0.000928571	RF1754	B5975_Sphingomonas	Fer
AY921831.1.1380	4.70048	Actinobacteria	Acidimicrobiia	Microtrichales	#N/A	#N/A	#N/A	0.000928571	RF1755	B340_o_Microtrichales	Non-fer
AB630675.1.1438	3.68888	Bacteroidetes	Ignavibacteria	SJA-28	Chlorobi bacterium OLB5	Chlorobi bacterium OLB5	Chlorobi bacterium OLB5	0.000928571	RF1756	B5252_Chlorobi bacterium OLB5	Fer
FQ659090.1.1302	4.44265	Gemmatimonadetes	Gemmatimonadetes	Gemmatimonadales	Gemmatimonadaceae	uncultured	uncultured prokaryote	0.000928571	RF1757	B6225_uncultured	Not differential
DQ297995.1.1449	1.09861	Planctomycetes	Phycisphaerae	Phycisphaerales	Phycisphaeraceae	uncultured	uncultured soil bacterium	0.000928571	RF1758	B21735_uncultured	Not differential
AB930629.1.1458	4.39445	Proteobacteria	Gammaproteobacteria	Methylococcales	Methylococcaceae	Methylocaldum	uncultured bacterium	0.000928571	RF1759	B8629_Methylocaldum	Fer
KF697497.1.1227	3.71357	Actinobacteria	Thermoleophilia	Gaiellales	uncultured	metagenome	metagenome	0.000928571	RF1760	B7709_metagenome	Not differential
EU844870.1.1533	6.68586	Firmicutes	Bacilli	Bacillales	Planococcaceae	Planococcus	#N/A	0.000928571	RF1761	B2058_Planococcus	Non-fer
HM243826.1.1468	5.6204	Chloroflexi	Anaerolineae	Anaerolineales	Anaerolineaceae	uncultured	#N/A	0.000928571	RF1762	B1730_uncultured	Not differential
EU135562.1.1287	4.27667	Latescibacteria	uncultured bacterium mle1-16	uncultured bacterium mle1-16	uncultured bacterium mle1-16	uncultured bacterium mle1-16	uncultured bacterium mle1-16	0.000928571	RF1763	B3988_uncultured bacterium mle1-16	Non-fer
KX212255.1.1200	2.07944	Proteobacteria	Gammaproteobacteria	Enterobacteriales	Enterobacteriaceae	Serratia	#N/A	0.000928571	RF1764	B14585_Serratia	Not differential
HM243810.1.1486	6.36475	Bacteroidetes	Bacteroidia	Bacteroidales	Bacteroidetes vadinHA17	#N/A	#N/A	0.000928571	RF1765	B2009_f_Bacteroidetes vadinHA17	Fer
GQ264209.1.1477	3.80666	Proteobacteria	Gammaproteobacteria	Gammaproteobacteria Incertae Sedis	Unknown Family	Acidibacter	#N/A	0.000928571	RF1766	B2196_Acidibacter	Non-fer
FPLL01000821.12.1485	4.09434	Actinobacteria	Thermoleophilia	Gaiellales	uncultured	metagenome	metagenome	0.000928571	RF1767	B10064_metagenome	Not differential
JF108099.1.1308	7.56372	Proteobacteria	Alphaproteobacteria	Rhizobiales	Beijerinckiaceae	alphaI cluster	Methylosinus trichosporium	0.000928571	RF1768	B472_alphaI cluster	Not differential
JN417585.1.1552	0.693147	Proteobacteria	Deltaproteobacteria	NB1-j	uncultured soil bacterium	uncultured soil bacterium	uncultured soil bacterium	0.000928571	RF1769	B7394_uncultured soil bacterium	Not differential
FPLS01034656.1.1458	3.73767	Proteobacteria	Deltaproteobacteria	Myxococcales	Polyangiaceae	Polyangium	metagenome	0.000928571	RF1770	B4772_Polyangium	Not differential
AJ534629.1.1291	3.17805	Proteobacteria	Deltaproteobacteria	Myxococcales	Haliangiaceae	Haliangium	#N/A	0.000928571	RF1771	B1196_Haliangium	Not differential
LN571254.1.1292	3.71357	Proteobacteria	Alphaproteobacteria	Caulobacterales	Caulobacteraceae	Asticcacaulis	#N/A	0.000928571	RF1772	B3764_Asticcacaulis	Fer
JN387371.1.1261	1.79176	Patescibacteria	CPR2	uncultured microorganism	uncultured microorganism	uncultured microorganism	uncultured microorganism	0.000928571	RF1773	B20048_uncultured microorganism	Fer
EF516646.1.1413	2.48491	Chloroflexi	Ktedonobacteria	Ktedonobacterales	Ktedonobacteraceae	1921-3	uncultured bacterium	0.000928571	RF1774	B3196_1921-3	Not differential
537fb3e11a7253072034a50e3a92f8a0	2.30259	Proteobacteria	Alphaproteobacteria	Rhodospirillales	uncultured	uncultured Rhodospirillaceae bacterium	uncultured Rhodospirillaceae bacterium	0.000928571	RF1775	B15287_uncultured Rhodospirillaceae bacterium	Not differential
22e9c323315fd5f143e789bd338ba187	5.35659	Chloroflexi	Anaerolineae	SBR1031	#N/A	#N/A	#N/A	0.000928571	RF1776	B2795_o_SBR1031	Not differential
72df72759db4191ec20f9141d0dc9d2f	2.94444	Cyanobacteria	Melainabacteria	Gastranaerophilales	Candidatus Melainabacteria bacterium GWA2_34_9	Candidatus Melainabacteria bacterium GWA2_34_9	Candidatus Melainabacteria bacterium GWA2_34_9	0.000928571	RF1777	B15568_Candidatus Melainabacteria bacterium GWA2_34_9	Not differential
4f6d60a66f7707eb41b2ae7b39700f72	2.77259	Verrucomicrobia	Verrucomicrobiae	Pedosphaerales	Pedosphaeraceae	Pedosphaera	#N/A	0.000928571	RF1778	B16274_Pedosphaera	Not differential
3ef473a965530fbb878dc04a2bde7177	4.94164	Nitrospinae	P9X2b3D02	#N/A	#N/A	#N/A	#N/A	0.000928571	RF1779	B6343_o_NA	Fer
3e377845796dc6aab42bdf68a434bdd0	3.8712	Armatimonadetes	uncultured	uncultured bacterium	uncultured bacterium	uncultured bacterium	uncultured bacterium	0.000928571	RF1780	B5839_uncultured bacterium	Not differential
3d508f8ab1acb714cd1a81c3febb1a6b	2.83321	Proteobacteria	Deltaproteobacteria	#N/A	#N/A	#N/A	#N/A	0.000928571	RF1781	B1846_o_NA	Not differential
4dfae1ac44fc7f2c249262c6230a0d5d	6.16542	Chloroflexi	Dehalococcoidia	vadinBA26	uncultured bacterium	uncultured bacterium	uncultured bacterium	0.000928571	RF1782	B579_uncultured bacterium	Not differential
bd6a0865270d3c76dac577c93c9b8eec	1.09861	Patescibacteria	Parcubacteria	Candidatus Jorgensenbacteria	#N/A	#N/A	#N/A	0.000928571	RF1783	B16668_o_Candidatus Jorgensenbacteria	Not differential
4b6d2a2ddd98aa7a05c6849b1ecc9259	3.2581	Proteobacteria	Gammaproteobacteria	Diplorickettsiales	Diplorickettsiaceae	Aquicella	#N/A	0.000928571	RF1784	B14062_Aquicella	Not differential
4887d7fd17d8ad0c19944eab95cbd303	3.71357	Kiritimatiellaeota	Kiritimatiellae	WCHB1-41	uncultured Verrucomicrobia bacterium	uncultured Verrucomicrobia bacterium	uncultured Verrucomicrobia bacterium	0.000928571	RF1785	B11810_uncultured Verrucomicrobia bacterium	Non-fer
0842ab1062bfd467a1ee34dfb76c49f0	3.29584	Planctomycetes	Phycisphaerae	MSBL9	GWC2-45-44	uncultured soil bacterium	uncultured soil bacterium	0.000928571	RF1786	B4919_uncultured soil bacterium	Non-fer
16b90ea2f7f18a116132fdf37b6124ec	2.19722	BRC1	#N/A	#N/A	#N/A	#N/A	#N/A	0.000928571	RF1787	B18440_o_NA	Not differential
f46eb7f996366b72f939e0206e5c4823	1.38629	Patescibacteria	Gracilibacteria	uncultured bacterium	uncultured bacterium	uncultured bacterium	uncultured bacterium	0.000928571	RF1788	B21125_uncultured bacterium	Not differential
64108a975dccb5b989c290b2a7004b71	5.85793	Bacteroidetes	Ignavibacteria	Kryptoniales	BSV26	uncultured soil bacterium	uncultured soil bacterium	0.000928571	RF1789	B2300_uncultured soil bacterium	Not differential
101cbff8f6230fd33fb85134330f49ab	3.13549	Planctomycetes	Planctomycetacia	Gemmatales	Gemmataceae	#N/A	#N/A	0.000928571	RF1790	B14605_f_Gemmataceae	Not differential
12c1eafc67e213d69e4af5c2311c3ab0	1.60944	Patescibacteria	CPR2	uncultured Clostridium sp.	uncultured Clostridium sp.	uncultured Clostridium sp.	uncultured Clostridium sp.	0.000928571	RF1791	B17759_uncultured Clostridium sp.	Not differential
390b29d38c4cbe6432e8fea431b76ed6	5.79606	Proteobacteria	Deltaproteobacteria	Myxococcales	Archangiaceae	Anaeromyxobacter	#N/A	0.000928571	RF1792	B1749_Anaeromyxobacter	Non-fer
e8a7c4f436b2509f3b3189e85690be53	3.13549	Chloroflexi	Anaerolineae	SBR1031	#N/A	#N/A	#N/A	0.000928571	RF1793	B9793_o_SBR1031	Non-fer
48fd5887fd8d51688eb7db8c6cd7b762	2.30259	Armatimonadetes	uncultured	#N/A	#N/A	#N/A	#N/A	0.000928571	RF1794	B15772_o_NA	Not differential
01a4281e37e2202dd86b672ab6e3436a	1.94591	Spirochaetes	Spirochaetia	Brevinematales	Brevinemataceae	Brevinema	uncultured bacterium	0.000928571	RF1795	B13472_Brevinema	Not differential
e5a0afbffabe2c2de499446ecda890a0	1.09861	Patescibacteria	ABY1	Candidatus Kerfeldbacteria	uncultured bacterium	uncultured bacterium	uncultured bacterium	0.000928571	RF1796	B21743_uncultured bacterium	Not differential
bdb1d09d2abe1e406e55d55433d18a16	4.40672	Chloroflexi	Ktedonobacteria	C0119	uncultured bacterium	uncultured bacterium	uncultured bacterium	0.000928571	RF1797	B2778_uncultured bacterium	Not differential
06f9cff71fedb4bf120cc4651834d70a	3.04452	Chloroflexi	TK10	uncultured bacterium	uncultured bacterium	uncultured bacterium	uncultured bacterium	0.000928571	RF1798	B6431_uncultured bacterium	Fer
b1eafed7fb39a39b103f8d67f8e6c225	1.38629	#N/A	#N/A	#N/A	#N/A	#N/A	#N/A	0.000928571	RF1799	B18646_o_NA	Not differential
e345137745e04fe4ec271bf121ef0a2f	2.3979	Verrucomicrobia	Verrucomicrobiae	Verrucomicrobiales	Verrucomicrobiaceae	uncultured	#N/A	0.000928571	RF1800	B17988_uncultured	Not differential
bec8b994540a6247a5a401c639b97f72	3.3673	Proteobacteria	Deltaproteobacteria	Myxococcales	Blfdi19	Anaeromyxobacter dehalogenans	Anaeromyxobacter dehalogenans	0.000928571	RF1801	B13572_Anaeromyxobacter dehalogenans	Not differential
4005e29d0751d0e37a08000c5959bbb7	2.77259	Acidobacteria	Subgroup 25	uncultured Acidobacteria bacterium	uncultured Acidobacteria bacterium	uncultured Acidobacteria bacterium	uncultured Acidobacteria bacterium	0.000928571	RF1802	B7233_uncultured Acidobacteria bacterium	Not differential
584b2d952df9558c5ab91f86c22ec0b5	2.89037	Hydrogenedentes	Hydrogenedentia	Hydrogenedentiales	Hydrogenedensaceae	#N/A	#N/A	0.000928571	RF1803	B7638_f_Hydrogenedensaceae	Not differential
ae2b07f16f15aa478f6d4e1cbb85e29c	1.79176	Actinobacteria	#N/A	#N/A	#N/A	#N/A	#N/A	0.000928571	RF1804	B3089_o_NA	Not differential
8029376dc359bba079fc3c8e3b719d23	3.3322	#N/A	#N/A	#N/A	#N/A	#N/A	#N/A	0.000928571	RF1805	B4263_o_NA	Fer
d47ddff6be72db276138db2a1fe42cc8	3.58352	Dependentiae	Babeliae	Babeliales	#N/A	#N/A	#N/A	0.000928571	RF1806	B8293_o_Babeliales	Not differential
FQ659562.1.1344	4.77912	Bacteroidetes	Bacteroidia	Flavobacteriales	Flavobacteriaceae	Flavobacterium	#N/A	0.000923077	RF1807	B4553_Flavobacterium	Fer
EU706181.1.1234	6.89366	Proteobacteria	Gammaproteobacteria	Betaproteobacteriales	Burkholderiaceae	#N/A	#N/A	0.000923077	RF1808	B1476_f_Burkholderiaceae	Fer
AF323771.1.1464	4.21951	Proteobacteria	Deltaproteobacteria	Syntrophobacterales	Syntrophaceae	Syntrophus	Syntrophus aciditrophicus SB	0.000923077	RF1809	B9408_Syntrophus	Fer
AB426232.1.1420	7.07581	Acidobacteria	Subgroup 6	#N/A	#N/A	#N/A	#N/A	0.000923077	RF1810	B198_o_NA	Not differential
FPLS01013181.28.1412	4.00733	Bacteroidetes	Bacteroidia	Chitinophagales	uncultured	uncultured delta proteobacterium	uncultured delta proteobacterium	0.000923077	RF1811	B3871_uncultured delta proteobacterium	Fer
FPLL01007766.1.1284	3.98898	Bacteroidetes	Bacteroidia	Sphingobacteriales	env.OPS 17	uncultured soil bacterium	uncultured soil bacterium	0.000923077	RF1812	B4457_uncultured soil bacterium	Fer
DQ129396.1.1475	4.12713	Firmicutes	Clostridia	Clostridiales	Clostridiaceae 1	Clostridium sensu stricto 1	#N/A	0.000923077	RF1813	B2012_Clostridium sensu stricto 1	Non-fer
FPLS01049893.1.1217	3.52636	Planctomycetes	OM190	metagenome	metagenome	metagenome	metagenome	0.000923077	RF1814	B3451_metagenome	Fer
EF515302.1.1410	3.73767	Acidobacteria	Subgroup 22	uncultured organism	uncultured organism	uncultured organism	uncultured organism	0.000923077	RF1815	B3419_uncultured organism	Not differential
FPLL01003198.19.1485	4.82831	Proteobacteria	Alphaproteobacteria	Azospirillales	Inquilinaceae	Inquilinus	#N/A	0.000923077	RF1816	B3550_Inquilinus	Fer
FPLS01013435.10.1398	1.60944	Proteobacteria	Alphaproteobacteria	#N/A	#N/A	#N/A	#N/A	0.000923077	RF1817	B18042_o_NA	Not differential
GQ487888.1.1517	4.27667	Acidobacteria	Thermoanaerobaculia	Thermoanaerobaculales	Thermoanaerobaculaceae	Subgroup 10	#N/A	0.000923077	RF1818	B9178_Subgroup 10	Not differential
AB630833.1.1416	3.46574	Chloroflexi	Anaerolineae	SBR1031	A4b	wastewater metagenome	wastewater metagenome	0.000923077	RF1819	B7920_wastewater metagenome	Not differential
FPLS01048870.11.1513	3.52636	Actinobacteria	Acidimicrobiia	uncultured	uncultured soil bacterium	uncultured soil bacterium	uncultured soil bacterium	0.000923077	RF1820	B4626_uncultured soil bacterium	Not differential
KF836030.1.1388	5.4848	Proteobacteria	Alphaproteobacteria	Rhizobiales	Xanthobacteraceae	Bradyrhizobium	#N/A	0.000923077	RF1821	B4557_Bradyrhizobium	Fer
HQ827958.1.1516	3.68888	Planctomycetes	vadinHA49	#N/A	#N/A	#N/A	#N/A	0.000923077	RF1822	B6699_o_NA	Not differential
EU266884.1.1460	4.41884	Chloroflexi	Anaerolineae	Anaerolineales	Anaerolineaceae	uncultured	#N/A	0.000923077	RF1823	B1439_uncultured	Not differential
FM213028.1.1488	3.7612	Bacteroidetes	Bacteroidia	Bacteroidales	Prolixibacteraceae	WCHB1-32	#N/A	0.000923077	RF1824	B8248_WCHB1-32	Not differential
AB487835.1.1352	3.63759	Firmicutes	Clostridia	Clostridiales	Clostridiaceae 1	Oxobacter	uncultured bacterium	0.000923077	RF1825	B12250_Oxobacter	Not differential
DQ520185.1.1489	7.33954	Acidobacteria	Subgroup 17	uncultured prokaryote	uncultured prokaryote	uncultured prokaryote	uncultured prokaryote	0.000923077	RF1826	B401_uncultured prokaryote	Fer
KX753080.1.1455	4.85981	Chloroflexi	Chloroflexia	Thermomicrobiales	JG30-KF-CM45	metagenome	metagenome	0.000923077	RF1827	B3715_metagenome	Non-fer
FPLP01007958.12.1538	4.51086	Proteobacteria	Deltaproteobacteria	PB19	uncultured Desulfuromonadales bacterium	uncultured Desulfuromonadales bacterium	uncultured Desulfuromonadales bacterium	0.000923077	RF1828	B992_uncultured Desulfuromonadales bacterium	Non-fer
AY661983.1.1502	2.89037	Armatimonadetes	Armatimonadia	Armatimonadales	#N/A	#N/A	#N/A	0.000923077	RF1829	B11622_o_Armatimonadales	Non-fer
AM935808.1.1334	5.65599	Actinobacteria	Actinobacteria	Propionibacteriales	Nocardioidaceae	Nocardioides	#N/A	0.000923077	RF1830	B3517_Nocardioides	Not differential
KY190457.1.1433	4.57471	Proteobacteria	Alphaproteobacteria	Elsterales	uncultured	#N/A	#N/A	0.000923077	RF1831	B624_f_uncultured	Not differential
FPLS01009533.16.1503	3.8712	Bacteroidetes	Bacteroidia	Cytophagales	Spirosomaceae	Dyadobacter	#N/A	0.000923077	RF1832	B11115_Dyadobacter	Not differential
AB630606.1.1445	2.77259	Planctomycetes	Planctomycetacia	Isosphaerales	Isosphaeraceae	uncultured	uncultured soil bacterium	0.000923077	RF1833	B11992_uncultured	Not differential
KJ192115.1.1470	2.94444	Planctomycetes	Phycisphaerae	Tepidisphaerales	WD2101 soil group	uncultured planctomycete	uncultured planctomycete	0.000923077	RF1834	B6904_uncultured planctomycete	Non-fer
JN023931.1.1489	4.09434	Proteobacteria	Gammaproteobacteria	Xanthomonadales	Rhodanobacteraceae	Dokdonella	#N/A	0.000923077	RF1835	B10075_Dokdonella	Not differential
EU134137.1.1332	3.46574	Chloroflexi	Anaerolineae	Ardenticatenales	uncultured	uncultured prokaryote	uncultured prokaryote	0.000923077	RF1836	B10391_uncultured prokaryote	Fer
AM490740.1.1541	4.78749	Proteobacteria	Deltaproteobacteria	Syntrophobacterales	Syntrophaceae	Desulfomonile	#N/A	0.000923077	RF1837	B926_Desulfomonile	Non-fer
JN627902.1.1484	3.52636	Firmicutes	Clostridia	Clostridiales	Peptococcaceae	Desulfitobacterium	#N/A	0.000923077	RF1838	B8255_Desulfitobacterium	Fer
DQ017940.1.1505	6.74406	Acidobacteria	Subgroup 17	#N/A	#N/A	#N/A	#N/A	0.000923077	RF1839	B559_o_NA	Fer
KX753053.1.1460	4.79579	Chloroflexi	Chloroflexia	Thermomicrobiales	JG30-KF-CM45	metagenome	metagenome	0.000923077	RF1840	B3267_metagenome	Fer
3ce8ba9862052249148b45348031ddd7	4.70953	Elusimicrobia	Elusimicrobia	MVP-88	uncultured bacterium	uncultured bacterium	uncultured bacterium	0.000923077	RF1841	B3445_uncultured bacterium	Not differential
b6e3937ea9049dc532ccdb98c93ca2b5	0.693147	Proteobacteria	Deltaproteobacteria	SAR324 clade(Marine group B)	uncultured soil bacterium	uncultured soil bacterium	uncultured soil bacterium	0.000923077	RF1842	B22360_uncultured soil bacterium	Not differential
6603a9ff7109cee79e32c615fd226a28	4.45435	Chloroflexi	Anaerolineae	RBG-13-54-9	#N/A	#N/A	#N/A	0.000923077	RF1843	B4105_o_RBG-13-54-9	Non-fer
462768e732d5055a6aeeef37cf44d8c6	6.21461	Acidobacteria	Acidobacteriia	Solibacterales	Solibacteraceae (Subgroup 3)	AKIW659	uncultured Acidobacterium sp.	0.000923077	RF1844	B2034_AKIW659	Non-fer
786fa1a353203f6a04f273f0198f8985	5.38907	Proteobacteria	Deltaproteobacteria	Myxococcales	P3OB-42	#N/A	#N/A	0.000923077	RF1845	B3820_f_P3OB-42	Not differential
007a3da9bdfcdf4b737adfe064605bcb	1.79176	Proteobacteria	Deltaproteobacteria	Myxococcales	MidBa8	uncultured bacterium	uncultured bacterium	0.000923077	RF1846	B17739_uncultured bacterium	Not differential
c1bf69decddefb3c5ba828eeb3e11c82	3.61092	Proteobacteria	Deltaproteobacteria	Oligoflexales	0319-6G20	#N/A	#N/A	0.000923077	RF1847	B12391_f_0319-6G20	Non-fer
75bcea61299198a7588cc3563296ca04	1.38629	Dependentiae	Babeliae	Babeliales	UBA12409	uncultured soil bacterium	uncultured soil bacterium	0.000923077	RF1848	B20848_uncultured soil bacterium	Not differential
fe3cdc96492230e68063885104f12b49	4.89035	Planctomycetes	Phycisphaerae	MSBL9	SG8-4	uncultured planctomycete	uncultured planctomycete	0.000923077	RF1849	B3205_uncultured planctomycete	Not differential
7e01af88c6cfbbba443ab0cbf706fc69	2.30259	Patescibacteria	Microgenomatia	Candidatus Woesebacteria	uncultured Microgenomates group bacterium	uncultured Microgenomates group bacterium	uncultured Microgenomates group bacterium	0.000923077	RF1850	B14271_uncultured Microgenomates group bacterium	Not differential
7c1a687ed9a5e68647b39418fb99761a	3.85015	Spirochaetes	Spirochaetia	Spirochaetales	Spirochaetaceae	Spirochaeta 2	uncultured bacterium	0.000923077	RF1851	B3100_Spirochaeta 2	Not differential
74771c3ebe3070c1ff14fb77b5673d52	2.89037	Planctomycetes	Planctomycetacia	Pirellulales	Pirellulaceae	uncultured	uncultured soil bacterium	0.000923077	RF1852	B5096_uncultured	Not differential
b373bd717e744cb704a01b1d8ef71059	2.3979	Kiritimatiellaeota	Kiritimatiellae	WCHB1-41	uncultured Verrucomicrobia bacterium	uncultured Verrucomicrobia bacterium	uncultured Verrucomicrobia bacterium	0.000923077	RF1853	B17936_uncultured Verrucomicrobia bacterium	Not differential
9f88932d7b4beef571a731273fdf20a9	3.71357	Omnitrophicaeota	uncultured Banisveld landfill bacterium BVC56	uncultured Banisveld landfill bacterium BVC56	uncultured Banisveld landfill bacterium BVC56	uncultured Banisveld landfill bacterium BVC56	uncultured Banisveld landfill bacterium BVC56	0.000923077	RF1854	B6059_uncultured Banisveld landfill bacterium BVC56	Not differential
20ae25f15e510894e35febbab671e258	5.59471	Acidobacteria	Acidobacteriia	Acidobacteriales	#N/A	#N/A	#N/A	0.000923077	RF1855	B2037_o_Acidobacteriales	Not differential
edbad02ed45e4f4a990e0f0e512116de	2.89037	Proteobacteria	Deltaproteobacteria	Oligoflexales	Oligoflexaceae	Silvanigrella	#N/A	0.000923077	RF1856	B14947_Silvanigrella	Not differential
4e019c83db08d004718ee1d7889f3abd	1.60944	Patescibacteria	ABY1	Candidatus Kerfeldbacteria	uncultured bacterium	uncultured bacterium	uncultured bacterium	0.000923077	RF1857	B18506_uncultured bacterium	Not differential
f5573fe57692c0957f65ff4477d66036	1.79176	Actinobacteria	Coriobacteriia	FS118-23B-02	uncultured bacterium	uncultured bacterium	uncultured bacterium	0.000923077	RF1858	B20003_uncultured bacterium	Not differential
ffd400e7ace7f151a7fe56d4d5452a38	5.03695	Actinobacteria	Acidimicrobiia	IMCC26256	uncultured organism	uncultured organism	uncultured organism	0.000923077	RF1859	B3930_uncultured organism	Non-fer
29da1cfae6228dd9298b7272d17a41fd	0.693147	Omnitrophicaeota	#N/A	#N/A	#N/A	#N/A	#N/A	0.000923077	RF1860	B21970_o_NA	Not differential
5ef1f01fa8ccc74a5e38e7f84c681c7d	2.77259	Chloroflexi	TK10	#N/A	#N/A	#N/A	#N/A	0.000923077	RF1861	B16285_o_NA	Not differential
c9da507a26249cbf055e59b059a1ddc9	3.98898	Bacteroidetes	Bacteroidia	Sphingobacteriales	#N/A	#N/A	#N/A	0.000923077	RF1862	B10558_o_Sphingobacteriales	Not differential
bc145a003cdc00ca80cc2ee2a335de8c	2.48491	Cyanobacteria	Melainabacteria	Gastranaerophilales	Candidatus Melainabacteria bacterium GWA2_34_9	Candidatus Melainabacteria bacterium GWA2_34_9	Candidatus Melainabacteria bacterium GWA2_34_9	0.000923077	RF1863	B17583_Candidatus Melainabacteria bacterium GWA2_34_9	Not differential
a93a5678259847febff434c10fa72914	2.07944	Firmicutes	Clostridia	Clostridiales	Ruminococcaceae	#N/A	#N/A	0.000923077	RF1864	B19020_f_Ruminococcaceae	Not differential
4d4a0a78d9cc86360aef17fbaef886b9	2.83321	Patescibacteria	CPR2	uncultured microorganism	uncultured microorganism	uncultured microorganism	uncultured microorganism	0.000923077	RF1865	B16025_uncultured microorganism	Not differential
f7fee73149056a20a0ed956dc6548210	4.11087	Planctomycetes	Pla3 lineage	uncultured bacterium	uncultured bacterium	uncultured bacterium	uncultured bacterium	0.000923077	RF1866	B5418_uncultured bacterium	Fer
a7ccc5b0de5fc7c8de8ce4bf27f7da09	3.13549	Planctomycetes	Planctomycetacia	Pirellulales	Pirellulaceae	Pir2 lineage	#N/A	0.000923077	RF1867	B14685_Pir2 lineage	Not differential
de822195a018f7e9c42f4e67eac0049c	4.07754	Chloroflexi	KD4-96	uncultured Longilinea sp.	uncultured Longilinea sp.	uncultured Longilinea sp.	uncultured Longilinea sp.	0.000923077	RF1868	B10131_uncultured Longilinea sp.	Fer
3b35105a39d8b13bd383ab4f331fbb47	2.56495	Planctomycetes	Phycisphaerae	Phycisphaerales	Phycisphaeraceae	uncultured	uncultured bacterium	0.000923077	RF1869	B17121_uncultured	Not differential
ce216b15485590c92206c634b096537f	2.83321	Chloroflexi	Ktedonobacteria	C0119	uncultured bacterium	uncultured bacterium	uncultured bacterium	0.000923077	RF1870	B5043_uncultured bacterium	Not differential
c79481b4ec4552ca5cfb7b09ac3bafce	2.30259	Omnitrophicaeota	uncultured bacterium	uncultured bacterium	uncultured bacterium	uncultured bacterium	uncultured bacterium	0.000923077	RF1871	B18306_uncultured bacterium	Not differential
ffad666438613ab2f73e332b1232b067	2.63906	Proteobacteria	Alphaproteobacteria	Rhodospirillales	uncultured	#N/A	#N/A	0.000923077	RF1872	B7612_f_uncultured	Not differential
e360d034d6b15e3ecbe7190cc0f911b2	3.97029	Chloroflexi	Anaerolineae	RBG-13-54-9	uncultured Caldilineaceae bacterium	uncultured Caldilineaceae bacterium	uncultured Caldilineaceae bacterium	0.000923077	RF1873	B6689_uncultured Caldilineaceae bacterium	Not differential
c05c888942ffdb5b7594c7fd15a843ed	2.3979	Proteobacteria	Deltaproteobacteria	Myxococcales	bacteriap25	uncultured Geobacter sp.	uncultured Geobacter sp.	0.000923077	RF1874	B17952_uncultured Geobacter sp.	Not differential
JX225584.1.1384	6.12249	Proteobacteria	Deltaproteobacteria	Desulfobacterales	Desulfobulbaceae	uncultured	uncultured prokaryote	0.000922149	RF1875	B385_uncultured	Not differential
EU133464.1.1318	4.26268	Proteobacteria	Alphaproteobacteria	Paracaedibacterales	Paracaedibacteraceae	Candidatus Paracaedibacter	metagenome	0.000916667	RF1876	B6775_Candidatus Paracaedibacter	Fer
FPLL01007315.17.1534	1.38629	Proteobacteria	Deltaproteobacteria	Oligoflexales	Oligoflexaceae	uncultured	metagenome	0.000916667	RF1877	B21153_uncultured	Not differential
JF265781.1.1378	4.58497	Acidobacteria	Holophagae	Subgroup 7	#N/A	#N/A	#N/A	0.000916667	RF1878	B3162_o_Subgroup 7	Fer
KM200400.1.1481	3.78419	Planctomycetes	Planctomycetacia	Isosphaerales	Isosphaeraceae	Candidatus Nostocoida	uncultured Nostocoida sp.	0.000916667	RF1879	B9825_Candidatus Nostocoida	Not differential
FPLP01006931.17.1246	3.3322	Planctomycetes	OM190	metagenome	metagenome	metagenome	metagenome	0.000916667	RF1880	B9115_metagenome	Fer
AB630500.1.1432	1.09861	Proteobacteria	Deltaproteobacteria	Bdellovibrionales	Bdellovibrionaceae	Bdellovibrio	Bdellovibrio sp. oral clone CA006	0.000916667	RF1881	B21589_Bdellovibrio	Not differential
GU127778.1.1489	6.82871	Nitrospirae	4-29-1	#N/A	#N/A	#N/A	#N/A	0.000916667	RF1882	B1829_o_NA	Non-fer
HM312995.1.1330	4.09434	Armatimonadetes	Fimbriimonadia	Fimbriimonadales	Fimbriimonadaceae	uncultured Armatimonadetes bacterium	uncultured Armatimonadetes bacterium	0.000916667	RF1883	B2411_uncultured Armatimonadetes bacterium	Not differential
FJ889256.1.1475	7.56476	Actinobacteria	Acidimicrobiia	Microtrichales	metagenome	metagenome	metagenome	0.000916667	RF1884	B226_metagenome	Not differential
JQ919768.1.1336	5.1358	Acidobacteria	Acidobacteriia	Solibacterales	Solibacteraceae (Subgroup 3)	Paludibaculum	uncultured Acidobacteria bacterium	0.000916667	RF1885	B1241_Paludibaculum	Non-fer
AB486585.1.1391	4.81218	Proteobacteria	Deltaproteobacteria	Myxococcales	P3OB-42	uncultured bacterium	uncultured bacterium	0.000916667	RF1886	B1629_uncultured bacterium	Fer
GU208398.1.1452	6.88755	Proteobacteria	Deltaproteobacteria	Syntrophobacterales	Syntrophobacteraceae	Syntrophobacter	uncultured prokaryote	0.000916667	RF1887	B433_Syntrophobacter	Not differential
LNDT01000039.103304.104660	2.94444	Proteobacteria	Deltaproteobacteria	Bdellovibrionales	Bdellovibrionaceae	Bdellovibrio	Bdellovibrionales bacterium Ga0074137	0.000916667	RF1888	B7867_Bdellovibrio	Fer
EU734937.1.1565	3.46574	Proteobacteria	Deltaproteobacteria	MBNT15	Actinobacteria bacterium RBG_13_63_9	Actinobacteria bacterium RBG_13_63_9	Actinobacteria bacterium RBG_13_63_9	0.000916667	RF1889	B4425_Actinobacteria bacterium RBG_13_63_9	Not differential
HQ674886.1.1499	3.3322	Bacteroidetes	Bacteroidia	Chitinophagales	Chitinophagaceae	Niastella	uncultured Bacteroidetes bacterium	0.000916667	RF1890	B13823_Niastella	Not differential
FM872716.1.1468	6.41346	Actinobacteria	Actinobacteria	Micromonosporales	Micromonosporaceae	#N/A	#N/A	0.000916667	RF1891	B505_f_Micromonosporaceae	Not differential
JN656879.1.1479	3.95124	Bacteroidetes	Bacteroidia	Bacteroidales	Prolixibacteraceae	WCHB1-32	#N/A	0.000916667	RF1892	B9257_WCHB1-32	Non-fer
KJ783111.1.1486	4.20469	Actinobacteria	Acidimicrobiia	uncultured	uncultured actinobacterium	uncultured actinobacterium	uncultured actinobacterium	0.000916667	RF1893	B3968_uncultured actinobacterium	Not differential
HQ597360.1.1506	3.3673	Acidobacteria	Subgroup 6	#N/A	#N/A	#N/A	#N/A	0.000916667	RF1894	B1566_o_NA	Not differential
HQ120759.1.1473	4.48864	Planctomycetes	Planctomycetacia	Gemmatales	Gemmataceae	Gemmata	#N/A	0.000916667	RF1895	B6145_Gemmata	Fer
GU454939.1.1497	1.09861	Planctomycetes	Planctomycetacia	Planctomycetales	uncultured	uncultured bacterium	uncultured bacterium	0.000916667	RF1896	B18781_uncultured bacterium	Not differential
JN417590.1.1555	1.38629	Dadabacteria	Dadabacteriia	Dadabacteriales	uncultured soil bacterium	uncultured soil bacterium	uncultured soil bacterium	0.000916667	RF1897	B4429_uncultured soil bacterium	Not differential
EU133348.1.1319	5.46806	Proteobacteria	Alphaproteobacteria	Sphingomonadales	Sphingomonadaceae	Novosphingobium	uncultured prokaryote	0.000916667	RF1898	B2019_Novosphingobium	Non-fer
FJ478996.1.1457	3.3673	Planctomycetes	Planctomycetacia	Gemmatales	Gemmataceae	uncultured	uncultured bacterium	0.000916667	RF1899	B12041_uncultured	Not differential
HG942156.1.1218	2.77259	Bacteroidetes	Bacteroidia	Cytophagales	Spirosomaceae	Spirosoma	#N/A	0.000916667	RF1900	B10586_Spirosoma	Not differential
JF796793.1.1357	2.30259	Bacteroidetes	Bacteroidia	Chitinophagales	37-13	#N/A	#N/A	0.000916667	RF1901	B8254_f_37-13	Not differential
JN397710.1.1451	4.09434	Proteobacteria	Gammaproteobacteria	Methylococcales	Methylococcaceae	Candidatus Methylospira	uncultured bacterium	0.000916667	RF1902	B4139_Candidatus Methylospira	Fer
JX222291.1.1468	3.17805	Chloroflexi	Anaerolineae	Anaerolineales	Anaerolineaceae	Levilinea	uncultured bacterium	0.000916667	RF1903	B14574_Levilinea	Not differential
LC124596.1.1491	5.01064	Verrucomicrobia	Verrucomicrobiae	Pedosphaerales	Pedosphaeraceae	ADurb.Bin063-1	#N/A	0.000916667	RF1904	B734_ADurb.Bin063-1	Non-fer
KC551732.1.1500	4.8752	Proteobacteria	Gammaproteobacteria	Gammaproteobacteria Incertae Sedis	Unknown Family	Candidatus Berkiella	#N/A	0.000916667	RF1905	B2460_Candidatus Berkiella	Not differential
7509a4a767b979835ae7f9383ab4d985	4.21951	Spirochaetes	Spirochaetia	Spirochaetales	Spirochaetaceae	Spirochaeta 2	#N/A	0.000916667	RF1906	B5674_Spirochaeta 2	Fer
62b40cda85e90af63faa90faad967d61	0.693147	Patescibacteria	Parcubacteria	Candidatus Kaiserbacteria	uncultured bacterium	uncultured bacterium	uncultured bacterium	0.000916667	RF1907	B22117_uncultured bacterium	Not differential
8b90cbddc958aadbaa33454dbd825a12	2.77259	Verrucomicrobia	Verrucomicrobiae	Verrucomicrobiales	Verrucomicrobiaceae	uncultured	#N/A	0.000916667	RF1908	B16311_uncultured	Not differential
8f01e8a35112b1792f08ca3b313f8ac4	3.43399	Chloroflexi	Anaerolineae	ADurb.Bin180	uncultured bacterium SJA-68	uncultured bacterium SJA-68	uncultured bacterium SJA-68	0.000916667	RF1909	B4158_uncultured bacterium SJA-68	Not differential
1f7b37a2b1ba0471bec3ced10d889239	3.17805	Fibrobacteres	Fibrobacteria	Fibrobacterales	possible family 01	uncultured prokaryote	uncultured prokaryote	0.000916667	RF1910	B9461_uncultured prokaryote	Not differential
a4949e314c5cf9c492bfba08bc14830c	2.3979	Planctomycetes	Planctomycetacia	Pirellulales	Pirellulaceae	Pirellula	uncultured Pasteuria sp.	0.000916667	RF1911	B13932_Pirellula	Not differential
e7c39f569983ec32488e92b5eb1a7fbe	3.04452	Bacteroidetes	Bacteroidia	Sphingobacteriales	#N/A	#N/A	#N/A	0.000916667	RF1912	B6828_o_Sphingobacteriales	Not differential
51b4ff8eb383be1569b037851201f580	5.22575	Chloroflexi	Anaerolineae	SJA-15	uncultured Chloroflexi bacterium	uncultured Chloroflexi bacterium	uncultured Chloroflexi bacterium	0.000916667	RF1913	B5339_uncultured Chloroflexi bacterium	Fer
f69142f9fd35d4a7bb82ceffa6670635	4.39445	Proteobacteria	Deltaproteobacteria	TX1A-33	uncultured bacterium	uncultured bacterium	uncultured bacterium	0.000916667	RF1914	B4072_uncultured bacterium	Not differential
9441e7426a8cb74bae65ff69825aae6c	1.79176	Proteobacteria	Gammaproteobacteria	Diplorickettsiales	Diplorickettsiaceae	uncultured	uncultured bacterium	0.000916667	RF1915	B19848_uncultured	Not differential
9b972fc73a2d1ca7f8dd2a5cc70c538a	3.17805	Proteobacteria	Deltaproteobacteria	Deltaproteobacteria Incertae Sedis	Unknown Family	Deferrisoma	#N/A	0.000916667	RF1916	B4536_Deferrisoma	Not differential
68b8bf820f2ff65fccdd9917f2acc935	2.56495	Planctomycetes	Phycisphaerae	Pla1 lineage	uncultured soil bacterium	uncultured soil bacterium	uncultured soil bacterium	0.000916667	RF1917	B17157_uncultured soil bacterium	Not differential
a854264f3c64f071728201843dae2a26	3.95124	Proteobacteria	Deltaproteobacteria	Deltaproteobacteria Incertae Sedis	Unknown Family	Deferrisoma	uncultured delta proteobacterium	0.000916667	RF1918	B10710_Deferrisoma	Not differential
01de4bbf48384537f982066edac19ab2	2.63906	Planctomycetes	OM190	#N/A	#N/A	#N/A	#N/A	0.000916667	RF1919	B15229_o_NA	Not differential
8a6c8755c63c1bdaa77cd18c00375be0	1.09861	Proteobacteria	Deltaproteobacteria	#N/A	#N/A	#N/A	#N/A	0.000916667	RF1920	B15328_o_NA	Not differential
9be16bdfc82b383fc3fd017aec0d5f12	1.09861	Chloroflexi	Chloroflexia	Chloroflexales	Roseiflexaceae	Kouleothrix	#N/A	0.000916667	RF1921	B13546_Kouleothrix	Not differential
eed2e19b6a6382ea89c1cb99e6800789	2.56495	#N/A	#N/A	#N/A	#N/A	#N/A	#N/A	0.000916667	RF1922	B17301_o_NA	Fer
2217e161ec480c2c9fe8f2d7f7161f29	4.43082	Verrucomicrobia	Verrucomicrobiae	Pedosphaerales	Pedosphaeraceae	#N/A	#N/A	0.000916667	RF1923	B4190_f_Pedosphaeraceae	Not differential
4963fa36cef2a11358b00900735c008c	4.20469	Verrucomicrobia	Verrucomicrobiae	Chthoniobacterales	Chthoniobacteraceae	Chthoniobacter	#N/A	0.000916667	RF1924	B7500_Chthoniobacter	Not differential
6845b2e2d0c09a242a713597e554a28f	4.17439	Proteobacteria	Gammaproteobacteria	Coxiellales	Coxiellaceae	Coxiella	#N/A	0.000916667	RF1925	B7011_Coxiella	Not differential
b804db0ae00307462da5b6c38d0da1df	2.94444	Spirochaetes	Spirochaetia	Spirochaetales	Spirochaetaceae	Spirochaeta 2	Spirochaeta sp.	0.000916667	RF1926	B3287_Spirochaeta 2	Not differential
aab41590380be13e66c894511da0e027	4.30407	Proteobacteria	Gammaproteobacteria	Diplorickettsiales	Diplorickettsiaceae	uncultured	uncultured bacterium	0.000916667	RF1927	B6711_uncultured	Not differential
e58162dcbc449172c4864b2e509a6fb6	4.21951	Proteobacteria	Gammaproteobacteria	Gammaproteobacteria Incertae Sedis	Unknown Family	Candidatus Berkiella	uncultured gamma proteobacterium	0.000916667	RF1928	B7838_Candidatus Berkiella	Not differential
0952edbd72a9b975e640397489b4c7fd	2.3979	Latescibacteria	uncultured bacterium mle1-16	uncultured bacterium mle1-16	uncultured bacterium mle1-16	uncultured bacterium mle1-16	uncultured bacterium mle1-16	0.000916667	RF1929	B2416_uncultured bacterium mle1-16	Not differential
5087129c7950de57cd07afe8b83c3863	5.05625	Proteobacteria	Deltaproteobacteria	Myxococcales	UASB-TL25	uncultured delta proteobacterium	uncultured delta proteobacterium	0.000916667	RF1930	B1411_uncultured delta proteobacterium	Fer
42f657c17b4ecbe8a542c57fa92b76c8	4.65396	Firmicutes	Clostridia	Clostridiales	Ruminococcaceae	#N/A	#N/A	0.000916667	RF1931	B5168_f_Ruminococcaceae	Not differential
a57d77e0414904b6ef250b7367e61826	2.77259	Proteobacteria	Deltaproteobacteria	Bdellovibrionales	Bdellovibrionaceae	Bdellovibrio	uncultured bacterium	0.000916667	RF1932	B9163_Bdellovibrio	Not differential
7da746088262e842fc877b0a93deae62	0.693147	Spirochaetes	Spirochaetia	Spirochaetales	Spirochaetaceae	#N/A	#N/A	0.000916667	RF1933	B22185_f_Spirochaetaceae	Not differential
9f0e7a1c5e2c8a03f00216be7afdf3c9	3.78419	Chloroflexi	Anaerolineae	SBR1031	uncultured Gemmatimonadetes bacterium	uncultured Gemmatimonadetes bacterium	uncultured Gemmatimonadetes bacterium	0.000916667	RF1934	B8507_uncultured Gemmatimonadetes bacterium	Not differential
00f24d514b84118356a2af35a0f2c415	1.94591	Actinobacteria	#N/A	#N/A	#N/A	#N/A	#N/A	0.000916667	RF1935	B19192_o_NA	Not differential
GQ402650.1.1491	7.42655	Verrucomicrobia	Verrucomicrobiae	Pedosphaerales	Pedosphaeraceae	ADurb.Bin063-1	#N/A	0.000909091	RF1936	B342_ADurb.Bin063-1	Fer
GU208360.1.1473	3.61092	Proteobacteria	Deltaproteobacteria	Syntrophobacterales	Syntrophobacteraceae	uncultured	uncultured prokaryote	0.000909091	RF1937	B12429_uncultured	Not differential
HM240942.1.1312	4.47734	Cyanobacteria	Oxyphotobacteria	Nostocales	Coleofasciculaceae	Microcoleus PCC-7113	Microcoleus sp. HTT-U-KK5	0.000909091	RF1938	B3853_Microcoleus PCC-7113	Non-fer
AB511017.1.1476	3.58352	Proteobacteria	Deltaproteobacteria	Bdellovibrionales	Bacteriovoracaceae	#N/A	#N/A	0.000909091	RF1939	B12526_f_Bacteriovoracaceae	Not differential
FN811185.1.1488	3.66356	Bacteroidetes	Bacteroidia	Sphingobacteriales	AKYH767	uncultured Bacteroidetes bacterium	uncultured Bacteroidetes bacterium	0.000909091	RF1940	B1998_uncultured Bacteroidetes bacterium	Not differential
EF632907.1.1542	5.01728	Actinobacteria	Thermoleophilia	Solirubrobacterales	67-14	metagenome	metagenome	0.000909091	RF1941	B1066_metagenome	Not differential
FJ824040.1.1411	3.85015	Planctomycetes	Planctomycetacia	Pirellulales	Pirellulaceae	Pir4 lineage	#N/A	0.000909091	RF1942	B2571_Pir4 lineage	Not differential
FQ658630.1.1364	2.94444	Spirochaetes	Spirochaetia	Spirochaetales	Spirochaetaceae	Spirochaeta 2	uncultured soil bacterium	0.000909091	RF1943	B15677_Spirochaeta 2	Not differential
LN571125.1.1342	3.13549	Planctomycetes	Phycisphaerae	Tepidisphaerales	Tepidisphaeraceae	uncultured planctomycete	uncultured planctomycete	0.000909091	RF1944	B11220_uncultured planctomycete	Not differential
KX753219.1.1423	3.71357	Chloroflexi	JG30-KF-CM66	metagenome	metagenome	metagenome	metagenome	0.000909091	RF1945	B3332_metagenome	Not differential
FPLP01000772.15.1519	2.63906	Planctomycetes	Planctomycetacia	Pirellulales	Pirellulaceae	Pirellula	#N/A	0.000909091	RF1946	B17027_Pirellula	Fer
KU050051.1.1431	5.19296	Actinobacteria	Actinobacteria	Propionibacteriales	Nocardioidaceae	Nocardioides	#N/A	0.000909091	RF1947	B4092_Nocardioides	Non-fer
JN038925.1.1456	2.07944	Chloroflexi	Anaerolineae	RBG-13-54-9	#N/A	#N/A	#N/A	0.000909091	RF1948	B1287_o_RBG-13-54-9	Not differential
EU135135.1.1351	4.68213	Planctomycetes	Planctomycetacia	Pirellulales	Pirellulaceae	uncultured	uncultured soil bacterium	0.000909091	RF1949	B3277_uncultured	Not differential
FJ889297.1.1448	7.4668	Proteobacteria	Alphaproteobacteria	Rhizobiales	Xanthobacteraceae	uncultured	#N/A	0.000909091	RF1950	B266_uncultured	Not differential
HQ119506.1.1385	3.04452	Planctomycetes	Planctomycetacia	Gemmatales	Gemmataceae	Gemmata	uncultured planctomycete	0.000909091	RF1951	B15206_Gemmata	Fer
AB487787.1.1349	3.78419	Firmicutes	Clostridia	Clostridiales	Peptococcaceae	Thermincola	uncultured eubacterium WCHB1-84	0.000909091	RF1952	B6983_Thermincola	Not differential
cc094dd19a1225db65e50dfc63e012ec	1.79176	#N/A	#N/A	#N/A	#N/A	#N/A	#N/A	0.000909091	RF1953	B19933_o_NA	Fer
9d5b0bf5f62e74e7463121d2b1977d17	4.85981	Armatimonadetes	uncultured	uncultured bacterium	uncultured bacterium	uncultured bacterium	uncultured bacterium	0.000909091	RF1954	B1385_uncultured bacterium	Not differential
88823f14c1a44067b6d0e8c40cb0f08f	4.91998	Armatimonadetes	#N/A	#N/A	#N/A	#N/A	#N/A	0.000909091	RF1955	B2897_o_NA	Not differential
4fdb8f2d3897edf0b914cfd717037363	4.47734	Chloroflexi	Anaerolineae	Anaerolineales	Anaerolineaceae	#N/A	#N/A	0.000909091	RF1956	B8217_f_Anaerolineaceae	Not differential
733917641f6926b697134aabc8e61e8a	2.94444	Acidobacteria	Subgroup 22	uncultured bacterium	uncultured bacterium	uncultured bacterium	uncultured bacterium	0.000909091	RF1957	B4897_uncultured bacterium	Not differential
15be5b54762fa657c19798ccf7f61e89	4.59512	Planctomycetes	Phycisphaerae	Tepidisphaerales	WD2101 soil group	#N/A	#N/A	0.000909091	RF1958	B2787_f_WD2101 soil group	Fer
ef8191c7a19de0e808013f3f1b0950b9	3.55535	Proteobacteria	Gammaproteobacteria	Coxiellales	Coxiellaceae	Coxiella	#N/A	0.000909091	RF1959	B3725_Coxiella	Not differential
c4ee01ecae5853365c301073f95e5244	5.73657	Acidobacteria	Subgroup 18	#N/A	#N/A	#N/A	#N/A	0.000909091	RF1960	B2001_o_NA	Fer
d44b6815ef2747e8a0cd8bd7b9eff2e7	2.19722	Chloroflexi	AD3	#N/A	#N/A	#N/A	#N/A	0.000909091	RF1961	B18701_o_NA	Not differential
f87dd442ed20de8ec5fe5b9e0c2ad048	3.97029	Proteobacteria	Deltaproteobacteria	Bdellovibrionales	Bdellovibrionaceae	Bdellovibrio	#N/A	0.000909091	RF1962	B6042_Bdellovibrio	Fer
fc77a533d4a94a68a93870d2aab2c0a5	2.77259	Planctomycetes	Pla4 lineage	#N/A	#N/A	#N/A	#N/A	0.000909091	RF1963	B12038_o_NA	Not differential
d6106750ccd8cfa57d18d2082a2d46ee	2.07944	#N/A	#N/A	#N/A	#N/A	#N/A	#N/A	0.000909091	RF1964	B13787_o_NA	Not differential
802848c7c94e01a10b663b6d7496eeef	3.3322	Chloroflexi	Anaerolineae	Anaerolineales	Anaerolineaceae	Leptolinea	metagenome	0.000909091	RF1965	B5218_Leptolinea	Non-fer
ca09bac65e42601f1cd8ef367b56a12d	2.63906	Fibrobacteres	Chitinivibrionia	uncultured	uncultured bacterium	uncultured bacterium	uncultured bacterium	0.000909091	RF1966	B7971_uncultured bacterium	Not differential
fa88cf03978f61b7bb7fc78defe4f790	5.66296	Chloroflexi	Anaerolineae	RBG-13-54-9	uncultured Caldilineaceae bacterium	uncultured Caldilineaceae bacterium	uncultured Caldilineaceae bacterium	0.000909091	RF1967	B3053_uncultured Caldilineaceae bacterium	Not differential
a6ed77ba79ccfb3ea2c607acf4e8921c	2.07944	Firmicutes	Clostridia	#N/A	#N/A	#N/A	#N/A	0.000909091	RF1968	B17211_o_NA	Not differential
45e35f0cee3e8a7ecfe2de7027f58127	3.58352	Actinobacteria	Acidimicrobiia	#N/A	#N/A	#N/A	#N/A	0.000909091	RF1969	B6399_o_NA	Fer
3e45a8d51c44835dd95645d4f48d834e	1.79176	#N/A	#N/A	#N/A	#N/A	#N/A	#N/A	0.000909091	RF1970	B8084_o_NA	Not differential
bd3ac6cd4ae33871c257ec358a616dc1	3.95124	Proteobacteria	Deltaproteobacteria	Myxococcales	Blfdi19	metagenome	metagenome	0.000909091	RF1971	B10718_metagenome	Fer
b9b44410783aa7188d2dd758246402a6	4.83628	Actinobacteria	Thermoleophilia	Solirubrobacterales	67-14	uncultured soil bacterium	uncultured soil bacterium	0.000909091	RF1972	B5116_uncultured soil bacterium	Not differential
4dc4de8c4a5bfb4be71d7ab0051a2344	2.19722	Patescibacteria	CPR2	uncultured bacterium	uncultured bacterium	uncultured bacterium	uncultured bacterium	0.000909091	RF1973	B15780_uncultured bacterium	Non-fer
cef729da2fd0016a6c3cd936e54cc114	2.19722	Armatimonadetes	#N/A	#N/A	#N/A	#N/A	#N/A	0.000909091	RF1974	B5044_o_NA	Not differential
60179450d899b11a902edbfef4e21459	4.64439	Proteobacteria	Gammaproteobacteria	Coxiellales	Coxiellaceae	Coxiella	#N/A	0.000909091	RF1975	B7502_Coxiella	Fer
665b060b60ab5cd5e6c2f5ebb531cb89	2.3979	Omnitrophicaeota	uncultured bacterium	uncultured bacterium	uncultured bacterium	uncultured bacterium	uncultured bacterium	0.000909091	RF1976	B4921_uncultured bacterium	Not differential
f2aab187aca87b2e6c33d0dded57e096	1.94591	Planctomycetes	vadinHA49	#N/A	#N/A	#N/A	#N/A	0.000909091	RF1977	B17312_o_NA	Not differential
HM277149.1.1349	2.70805	Proteobacteria	Gammaproteobacteria	Salinisphaerales	Solimonadaceae	Panacagrimonas	#N/A	0.0009	RF1978	B10069_Panacagrimonas	Not differential
HQ697380.1.1521	2.77259	Acidobacteria	Subgroup 17	metagenome	metagenome	metagenome	metagenome	0.0009	RF1979	B4541_metagenome	Fer
FJ484555.1.1322	5.84932	Acidobacteria	Acidobacteriia	Solibacterales	Solibacteraceae (Subgroup 3)	AKIW659	uncultured Acidobacterium sp.	0.0009	RF1980	B2164_AKIW659	Not differential
EU132794.1.1350	5.52943	Actinobacteria	Acidimicrobiia	Microtrichales	#N/A	#N/A	#N/A	0.0009	RF1981	B743_o_Microtrichales	Fer
JX504964.1.1432	7.82804	Chloroflexi	Anaerolineae	Anaerolineales	Anaerolineaceae	RBG-16-58-14	#N/A	0.0009	RF1982	B528_RBG-16-58-14	Not differential
FJ592549.1.1348	7.89208	Proteobacteria	Alphaproteobacteria	Rhizobiales	Xanthobacteraceae	#N/A	#N/A	0.0009	RF1983	B34_f_Xanthobacteraceae	Non-fer
KC921176.1.1320	2.99573	Acidobacteria	Acidobacteriia	Solibacterales	Solibacteraceae (Subgroup 3)	Elev-16S-1166	#N/A	0.0009	RF1984	B12450_Elev-16S-1166	Non-fer
KJ574407.1.1224	2.70805	Proteobacteria	Gammaproteobacteria	Pseudomonadales	Moraxellaceae	Psychrobacter	#N/A	0.0009	RF1985	B16766_Psychrobacter	Fer
FQ658602.1.1309	1.38629	Chloroflexi	Anaerolineae	SBR1031	A4b	uncultured soil bacterium	uncultured soil bacterium	0.0009	RF1986	B16417_uncultured soil bacterium	Not differential
MWEL01000072.11503.13068	6.7093	Verrucomicrobia	Verrucomicrobiae	Pedosphaerales	Pedosphaeraceae	ADurb.Bin063-1	Verrucomicrobia bacterium ADurb.Bin063	0.0009	RF1987	B1004_ADurb.Bin063-1	Not differential
EF589965.1.1348	7.81803	Chloroflexi	Anaerolineae	Anaerolineales	Anaerolineaceae	Anaerolinea	uncultured bacterium	0.0009	RF1988	B269_Anaerolinea	Fer
EU431712.1.1474	4.93447	Proteobacteria	Deltaproteobacteria	Bdellovibrionales	Bdellovibrionaceae	Bdellovibrio	Bdellovibrio exovorus JSS	0.0009	RF1989	B2867_Bdellovibrio	Not differential
KX509684.1.1452	2.83321	Proteobacteria	Alphaproteobacteria	Acetobacterales	Acetobacteraceae	uncultured	bacterium enrichment culture clone SBIb19	0.0009	RF1990	B6503_uncultured	Not differential
KU253630.1.1373	4.20469	Proteobacteria	Alphaproteobacteria	Rhizobiales	Rhizobiaceae	Aureimonas	#N/A	0.0009	RF1991	B5699_Aureimonas	Fer
FPLP01006193.1.1492	2.3979	Proteobacteria	Deltaproteobacteria	Myxococcales	mle1-27	metagenome	metagenome	0.0009	RF1992	B18038_metagenome	Fer
AB630641.1.1430	5.32301	Acidobacteria	Acidobacteriia	Solibacterales	Solibacteraceae (Subgroup 3)	Candidatus Solibacter	#N/A	0.0009	RF1993	B1095_Candidatus Solibacter	Not differential
EU799951.1.1499	4.33073	Proteobacteria	Gammaproteobacteria	Betaproteobacteriales	B1-7BS	uncultured beta proteobacterium	uncultured beta proteobacterium	0.0009	RF1994	B2757_uncultured beta proteobacterium	Not differential
KF080558.1.1339	6.44572	Actinobacteria	Actinobacteria	#N/A	#N/A	#N/A	#N/A	0.0009	RF1995	B949_o_NA	Fer
FPLL01001359.9.1544	2.3979	Verrucomicrobia	Verrucomicrobiae	Opitutales	Opitutaceae	#N/A	#N/A	0.0009	RF1996	B7744_f_Opitutaceae	Not differential
FJ482179.1.1396	3.43399	Patescibacteria	Parcubacteria	Candidatus Moranbacteria	uncultured Parcubacteria group bacterium	uncultured Parcubacteria group bacterium	uncultured Parcubacteria group bacterium	0.0009	RF1997	B5456_uncultured Parcubacteria group bacterium	Not differential
EU134418.1.1258	5.22575	Proteobacteria	Deltaproteobacteria	Oligoflexales	0319-6G20	uncultured Syntrophobacteraceae bacterium	uncultured Syntrophobacteraceae bacterium	0.0009	RF1998	B1296_uncultured Syntrophobacteraceae bacterium	Not differential
LN571127.1.1383	2.77259	Planctomycetes	Phycisphaerae	Tepidisphaerales	CPla-3 termite group	metagenome	metagenome	0.0009	RF1999	B8415_metagenome	Not differential
[truncated: 6,046 more rows]

## Sheet: Nutrient-poor_Arch
OTU	Abun	Phylum	Class	Order	Family	Genus	Species	MeanDecreaseGini	rank	OTU_id	Enriched
EF022239.1.901	6.76504	Thaumarchaeota	Nitrososphaeria	Nitrososphaerales	Nitrososphaeraceae	Candidatus Nitrocosmicus	#N/A	0.720023	RF1	A16_Candidatus Nitrocosmicus	Non-fer
FN691714.1.913	8.39773	Thaumarchaeota	Nitrososphaeria	Nitrosotaleales	Nitrosotaleaceae	Candidatus Nitrosotalea	uncultured crenarchaeote	0.580556	RF2	A14_Candidatus Nitrosotalea	Non-fer
HQ269186.1.966	7.26543	Euryarchaeota	Methanomicrobia	Methanocellales	Methanocellaceae	Rice Cluster I	#N/A	0.452713	RF3	A20_Rice Cluster I	Non-fer
JN649123.1.1042	9.06993	Euryarchaeota	Methanomicrobia	Methanomicrobiales	Methanoregulaceae	Methanoregula	#N/A	0.448364	RF4	A9_Methanoregula	Not differential
EU155943.1.1446	7.61283	Euryarchaeota	Methanomicrobia	Methanosarcinales	Methanosarcinaceae	Methanosarcina	#N/A	0.366261	RF5	A21_Methanosarcina	Fer
EF043525.1.1091	8.98093	Euryarchaeota	Methanobacteria	Methanobacteriales	Methanobacteriaceae	Methanobacterium	#N/A	0.358849	RF6	A12_Methanobacterium	Not differential
HQ532941.1.921	8.82247	Crenarchaeota	Bathyarchaeia	uncultured methanogenic archaeon	uncultured methanogenic archaeon	uncultured methanogenic archaeon	uncultured methanogenic archaeon	0.270609	RF7	A5_uncultured methanogenic archaeon	Non-fer
HE796197.1.926	8.75637	Crenarchaeota	Bathyarchaeia	uncultured methanogenic archaeon	uncultured methanogenic archaeon	uncultured methanogenic archaeon	uncultured methanogenic archaeon	0.252787	RF8	A23_uncultured methanogenic archaeon	Not differential
JX023134.1.973	9.06531	Euryarchaeota	Methanomicrobia	Methanomicrobiales	uncultured	#N/A	#N/A	0.237257	RF9	A7_f_uncultured	Fer
EU155912.1.1470	7.10743	Euryarchaeota	Methanomicrobia	Methanosarcinales	Methanosaetaceae	Methanosaeta	uncultured archaeon	0.232646	RF10	A29_Methanosaeta	Non-fer
KM221262.1.941	8.97651	Crenarchaeota	Bathyarchaeia	#N/A	#N/A	#N/A	#N/A	0.21985	RF11	A3_o_NA	Not differential
KC926106.1.912	6.99393	Crenarchaeota	Bathyarchaeia	uncultured euryarchaeote	uncultured euryarchaeote	uncultured euryarchaeote	uncultured euryarchaeote	0.209774	RF12	A43_uncultured euryarchaeote	Non-fer
EU519253.1.1054	9.10142	Euryarchaeota	Methanomicrobia	Methanosarcinales	Methanosaetaceae	Methanosaeta	uncultured archaeon	0.185228	RF13	A4_Methanosaeta	Not differential
e16cf6395643ccdffeac747ab0c3e241	3.82864	Nanoarchaeaeota	Woesearchaeia	uncultured archaeon	uncultured archaeon	uncultured archaeon	uncultured archaeon	0.18449	RF14	A362_uncultured archaeon	Non-fer
LN590653.1.1220	5.03695	Thaumarchaeota	Nitrososphaeria	Nitrosopumilales	Nitrosopumilaceae	Candidatus Nitrosoarchaeum	#N/A	0.173724	RF15	A82_Candidatus Nitrosoarchaeum	Fer
2d665a9a0b55948615079fba14e82ad7	6.86693	Euryarchaeota	Methanomicrobia	Methanosarcinales	Methanosaetaceae	Methanosaeta	Methanosaeta sp. ARCH	0.165214	RF16	A31_Methanosaeta	Non-fer
HQ330726.1.919	8.7971	Euryarchaeota	Methanomicrobia	Methanosarcinales	Methanosaetaceae	Methanosaeta	#N/A	0.149047	RF17	A10_Methanosaeta	Not differential
EU155989.1.1048	7.89655	Euryarchaeota	Methanobacteria	Methanobacteriales	Methanobacteriaceae	Methanobacterium	uncultured euryarchaeote	0.136676	RF18	A8_Methanobacterium	Fer
305f62411c7957ab97cfb5d07064adbe	4.77068	Nanoarchaeaeota	Woesearchaeia	Nanoarchaeota archaeon SCGC AAA011-D5	Nanoarchaeota archaeon SCGC AAA011-D5	Nanoarchaeota archaeon SCGC AAA011-D5	Nanoarchaeota archaeon SCGC AAA011-D5	0.135683	RF19	A202_Nanoarchaeota archaeon SCGC AAA011-D5	Non-fer
JF304122.1.1439	8.40671	Euryarchaeota	Methanomicrobia	Methanosarcinales	Methanoperedenaceae	Candidatus Methanoperedens	Candidatus Methanoperedens sp. BLZ1	0.131531	RF20	A6_Candidatus Methanoperedens	Fer
9217952193f5731b811636fc017ccb1a	5.37064	Altiarchaeota	Altiarchaeia	uncultured euryarchaeote	uncultured euryarchaeote	uncultured euryarchaeote	uncultured euryarchaeote	0.117441	RF21	A106_uncultured euryarchaeote	Non-fer
FJ957949.1.906	8.15335	Crenarchaeota	Bathyarchaeia	uncultured methanogenic archaeon	uncultured methanogenic archaeon	uncultured methanogenic archaeon	uncultured methanogenic archaeon	0.0988085	RF22	A24_uncultured methanogenic archaeon	Not differential
f5b59d916d0f0bcfa494c09579285369	5.04343	Nanoarchaeaeota	Woesearchaeia	Candidatus Staskawiczbacteria bacterium RIFCSPHIGHO2_01_FULL_34_27	Candidatus Staskawiczbacteria bacterium RIFCSPHIGHO2_01_FULL_34_27	Candidatus Staskawiczbacteria bacterium RIFCSPHIGHO2_01_FULL_34_27	Candidatus Staskawiczbacteria bacterium RIFCSPHIGHO2_01_FULL_34_27	0.0947284	RF23	A168_Candidatus Staskawiczbacteria bacterium RIFCSPHIGHO2_01_FULL_34_27	Non-fer
196a0e57f2a933f1ccaee5286522f858	4.21951	Nanoarchaeaeota	Woesearchaeia	#N/A	#N/A	#N/A	#N/A	0.0908037	RF24	A177_o_NA	Non-fer
EU519299.1.1054	7.60489	Euryarchaeota	Methanomicrobia	Methanocellales	Methanocellaceae	Methanocella	#N/A	0.0869527	RF25	A19_Methanocella	Not differential
b75f80fe7dc6e4726b261b5c97608854	5.17615	Nanoarchaeaeota	Woesearchaeia	#N/A	#N/A	#N/A	#N/A	0.0851945	RF26	A112_o_NA	Non-fer
5072717a4601a11b71e8d216c552175d	3.91202	Nanoarchaeaeota	Woesearchaeia	uncultured euryarchaeote	uncultured euryarchaeote	uncultured euryarchaeote	uncultured euryarchaeote	0.0826753	RF27	A108_uncultured euryarchaeote	Non-fer
FJ907179.1.1347	7.59589	Euryarchaeota	Methanomicrobia	Methanosarcinales	Methanoperedenaceae	Candidatus Methanoperedens	archaeon enrichment culture clone LCB_A1C7	0.0795041	RF28	A13_Candidatus Methanoperedens	Non-fer
AB236063.1.1325	8.50654	Euryarchaeota	Methanobacteria	Methanobacteriales	Methanobacteriaceae	Methanobacterium	Methanobacterium oryzae	0.0745114	RF29	A17_Methanobacterium	Not differential
EU155991.1.1465	7.72842	Crenarchaeota	Bathyarchaeia	unidentified archaeon	unidentified archaeon	unidentified archaeon	unidentified archaeon	0.0718213	RF30	A11_unidentified archaeon	Fer
JN397858.1.1421	8.90612	Crenarchaeota	Bathyarchaeia	unidentified archaeon	unidentified archaeon	unidentified archaeon	unidentified archaeon	0.069782	RF31	A22_unidentified archaeon	Non-fer
AB243805.1.1342	5.79909	Crenarchaeota	Bathyarchaeia	uncultured euryarchaeote	uncultured euryarchaeote	uncultured euryarchaeote	uncultured euryarchaeote	0.0686868	RF32	A53_uncultured euryarchaeote	Not differential
7c637befd168b75fff19c5ba8ba1111e	2.77259	Nanoarchaeaeota	Woesearchaeia	Candidatus Pacearchaeota archaeon CG1_02_31_27	Candidatus Pacearchaeota archaeon CG1_02_31_27	Candidatus Pacearchaeota archaeon CG1_02_31_27	Candidatus Pacearchaeota archaeon CG1_02_31_27	0.0659202	RF33	A387_Candidatus Pacearchaeota archaeon CG1_02_31_27	Non-fer
KF758471.1.1250	8.15306	Crenarchaeota	Bathyarchaeia	uncultured methanogenic archaeon	uncultured methanogenic archaeon	uncultured methanogenic archaeon	uncultured methanogenic archaeon	0.0650299	RF34	A33_uncultured methanogenic archaeon	Not differential
KJ566493.1.955	3.85015	Nanoarchaeaeota	Woesearchaeia	uncultured euryarchaeote	uncultured euryarchaeote	uncultured euryarchaeote	uncultured euryarchaeote	0.0631017	RF35	A232_uncultured euryarchaeote	Fer
dbef1a0670e1f8024e5a6e70960fb674	5.22036	Nanoarchaeaeota	Woesearchaeia	uncultured euryarchaeote	uncultured euryarchaeote	uncultured euryarchaeote	uncultured euryarchaeote	0.0607941	RF36	A143_uncultured euryarchaeote	Fer
KX077526.1.909	6.96035	Euryarchaeota	Methanomicrobia	Methanosarcinales	Methanoperedenaceae	Candidatus Methanoperedens	#N/A	0.0577504	RF37	A50_Candidatus Methanoperedens	Not differential
KJ476552.1.912	5.22036	Euryarchaeota	Thermoplasmata	Methanomassiliicoccales	Methanomassiliicoccaceae	Methanomassiliicoccus	#N/A	0.0569926	RF38	A89_Methanomassiliicoccus	Not differential
a58a52609ec817ded9f2495d0ebc2d39	5.50533	Nanoarchaeaeota	Woesearchaeia	uncultured euryarchaeote	uncultured euryarchaeote	uncultured euryarchaeote	uncultured euryarchaeote	0.0557531	RF39	A96_uncultured euryarchaeote	Fer
f04abaa7aa665f64e25f05f5c5d2044f	2.83321	Nanoarchaeaeota	Woesearchaeia	#N/A	#N/A	#N/A	#N/A	0.0531974	RF40	A499_o_NA	Not differential
EU519277.1.1019	7.48605	Euryarchaeota	Methanobacteria	Methanobacteriales	Methanobacteriaceae	Methanobacterium	Methanobacterium oryzae	0.0517457	RF41	A58_Methanobacterium	Not differential
44de0f18468ca1b63d521511c2eb223d	3.29584	Nanoarchaeaeota	Woesearchaeia	uncultured euryarchaeote	uncultured euryarchaeote	uncultured euryarchaeote	uncultured euryarchaeote	0.0512097	RF42	A213_uncultured euryarchaeote	Not differential
9841fd2a75acd73d88b5409605852439	3.17805	Nanoarchaeaeota	Woesearchaeia	uncultured euryarchaeote	uncultured euryarchaeote	uncultured euryarchaeote	uncultured euryarchaeote	0.0502598	RF43	A198_uncultured euryarchaeote	Non-fer
b179ed3d6833d0bd36c4d7e72a35b745	3.17805	Nanoarchaeaeota	Woesearchaeia	Candidatus Diapherotrites archaeon ADurb.Bin253	Candidatus Diapherotrites archaeon ADurb.Bin253	Candidatus Diapherotrites archaeon ADurb.Bin253	Candidatus Diapherotrites archaeon ADurb.Bin253	0.0489112	RF44	A342_Candidatus Diapherotrites archaeon ADurb.Bin253	Non-fer
KC926368.1.913	6.94698	Crenarchaeota	Bathyarchaeia	#N/A	#N/A	#N/A	#N/A	0.0449559	RF45	A2_o_NA	Not differential
EU155897.1.1462	7.27448	Euryarchaeota	Methanomicrobia	Methanosarcinales	Methanosarcinaceae	Methanosarcina	#N/A	0.0444837	RF46	A36_Methanosarcina	Non-fer
JF304133.1.1436	7.30854	Euryarchaeota	Methanomicrobia	Methanomicrobiales	Methanoregulaceae	Methanoregula	#N/A	0.0442764	RF47	A34_Methanoregula	Non-fer
JN398041.1.1399	5.43372	Euryarchaeota	Thermoplasmata	Methanomassiliicoccales	Methanomassiliicoccaceae	uncultured	#N/A	0.0439466	RF48	A73_uncultured	Not differential
EU662668.1.1458	7.96901	Crenarchaeota	Bathyarchaeia	unidentified archaeon	unidentified archaeon	unidentified archaeon	unidentified archaeon	0.0398279	RF49	A15_unidentified archaeon	Non-fer
AJ631256.1.987	3.82864	Altiarchaeota	Altiarchaeia	uncultured archaeon	uncultured archaeon	uncultured archaeon	uncultured archaeon	0.0390928	RF50	A98_uncultured archaeon	Not differential
KC682077.1.1426	4.40672	Asgardaeota	Lokiarchaeia	uncultured archaeon VC2.1 Arc31	uncultured archaeon VC2.1 Arc31	uncultured archaeon VC2.1 Arc31	uncultured archaeon VC2.1 Arc31	0.0377725	RF51	A90_uncultured archaeon VC2.1 Arc31	Non-fer
KJ566513.1.955	3.7612	Nanoarchaeaeota	Woesearchaeia	uncultured euryarchaeote	uncultured euryarchaeote	uncultured euryarchaeote	uncultured euryarchaeote	0.0356981	RF52	A255_uncultured euryarchaeote	Non-fer
4042b62895a3604c93f418dd9c7d4a88	3.3322	Nanoarchaeaeota	Woesearchaeia	uncultured euryarchaeote	uncultured euryarchaeote	uncultured euryarchaeote	uncultured euryarchaeote	0.033514	RF53	A256_uncultured euryarchaeote	Non-fer
KP987251.1.1361	5.79606	Euryarchaeota	Methanomicrobia	Methanosarcinales	Methanosaetaceae	Methanosaeta	#N/A	0.0331641	RF54	A125_Methanosaeta	Non-fer
AY175392.1.1057	5.00395	Euryarchaeota	Methanomicrobia	Methanomicrobiales	Rice Cluster II	uncultured Methanomicrobiales archaeon	uncultured Methanomicrobiales archaeon	0.0329702	RF55	A26_uncultured Methanomicrobiales archaeon	Non-fer
a2cfa8886b0b3c720ece0a11006be476	3.29584	Crenarchaeota	Bathyarchaeia	uncultured euryarchaeote	uncultured euryarchaeote	uncultured euryarchaeote	uncultured euryarchaeote	0.0323115	RF56	A453_uncultured euryarchaeote	Not differential
HM244058.1.911	4.23411	Euryarchaeota	Thermoplasmata	Methanomassiliicoccales	Methanomassiliicoccaceae	uncultured	uncultured archaeon	0.031973	RF57	A134_uncultured	Fer
EF552191.1.1046	6.22654	Euryarchaeota	Methanomicrobia	Methanosarcinales	Methanosarcinaceae	Methanosarcina	#N/A	0.0312363	RF58	A93_Methanosarcina	Non-fer
HQ330687.1.912	7.67555	Euryarchaeota	Methanomicrobia	Methanomicrobiales	Methanoregulaceae	Methanoregula	#N/A	0.0310593	RF59	A30_Methanoregula	Non-fer
FPLM01005453.4.1463	6.64769	Euryarchaeota	Methanomicrobia	Methanosarcinales	Methanosaetaceae	Methanosaeta	#N/A	0.0309665	RF60	A44_Methanosaeta	Non-fer
JN398042.1.901	7.18917	Euryarchaeota	Methanomicrobia	Methanomicrobiales	Methanoregulaceae	Methanoregula	#N/A	0.0307059	RF61	A69_Methanoregula	Not differential
9514def78ee03440e5de68c8f1b9a10d	4.35671	Thaumarchaeota	Marine Benthic Group A	#N/A	#N/A	#N/A	#N/A	0.0305295	RF62	A136_o_NA	Non-fer
a2bf207ac3dbe43b8397b4af84ddec8b	2.89037	Diapherotrites	Micrarchaeia	uncultured euryarchaeote VAL90	uncultured euryarchaeote VAL90	uncultured euryarchaeote VAL90	uncultured euryarchaeote VAL90	0.0305108	RF63	A430_uncultured euryarchaeote VAL90	Non-fer
KC926399.1.922	6.76504	Euryarchaeota	Methanomicrobia	Methanosarcinales	Methanosarcinaceae	Methanosarcina	#N/A	0.0298297	RF64	A70_Methanosarcina	Non-fer
2ffe8c1601302543c1151faf7473452b	4.85981	Nanoarchaeaeota	Woesearchaeia	#N/A	#N/A	#N/A	#N/A	0.0297016	RF65	A123_o_NA	Fer
a72436d09a817a68445b6034e1c41134	4.11087	Altiarchaeota	Altiarchaeia	#N/A	#N/A	#N/A	#N/A	0.0293829	RF66	A174_o_NA	Non-fer
DQ837283.1.1296	5.40268	Thaumarchaeota	#N/A	#N/A	#N/A	#N/A	#N/A	0.0283314	RF67	A49_o_NA	Fer
JN810750.1.917	5.97635	Euryarchaeota	Methanomicrobia	Methanosarcinales	Methanosarcinaceae	Methanosarcina	#N/A	0.0282592	RF68	A42_Methanosarcina	Non-fer
91c1f7d27b8de41b97fbbfd802fa2e75	3.55535	Crenarchaeota	Bathyarchaeia	uncultured Bathyarchaeota archaeon	uncultured Bathyarchaeota archaeon	uncultured Bathyarchaeota archaeon	uncultured Bathyarchaeota archaeon	0.0274567	RF69	A105_uncultured Bathyarchaeota archaeon	Non-fer
HE796088.1.905	6.9489	Euryarchaeota	Methanomicrobia	Methanosarcinales	Methanosaetaceae	Methanosaeta	#N/A	0.0267204	RF70	A61_Methanosaeta	Non-fer
ef9807487804c4145ec73f184a0d1548	4.34381	Altiarchaeota	Altiarchaeia	uncultured euryarchaeote	uncultured euryarchaeote	uncultured euryarchaeote	uncultured euryarchaeote	0.0263038	RF71	A146_uncultured euryarchaeote	Not differential
54e80a4770aaf4c98b0f281684004029	4.67283	Nanoarchaeaeota	Woesearchaeia	uncultured euryarchaeote	uncultured euryarchaeote	uncultured euryarchaeote	uncultured euryarchaeote	0.0251499	RF72	A203_uncultured euryarchaeote	Fer
FJ755718.1.967	6.82979	Euryarchaeota	Methanomicrobia	Methanosarcinales	Methanosaetaceae	Methanosaeta	uncultured archaeon	0.0248937	RF73	A27_Methanosaeta	Non-fer
EU155999.1.1471	4.02535	Thaumarchaeota	SCGC AB-179-E04	uncultured archaeon	uncultured archaeon	uncultured archaeon	uncultured archaeon	0.0243997	RF74	A97_uncultured archaeon	Not differential
KC926149.1.910	7.55276	Crenarchaeota	Bathyarchaeia	unidentified archaeon	unidentified archaeon	unidentified archaeon	unidentified archaeon	0.0236984	RF75	A28_unidentified archaeon	Non-fer
09325063c06f75399ba974fef6262767	4.02535	Nanoarchaeaeota	Woesearchaeia	#N/A	#N/A	#N/A	#N/A	0.0236656	RF76	A158_o_NA	Non-fer
GU135492.1.1364	7.40671	Crenarchaeota	Bathyarchaeia	#N/A	#N/A	#N/A	#N/A	0.0235393	RF77	A18_o_NA	Fer
aa69fad35c9592ae4d63025f3c7892e9	2.19722	Nanoarchaeaeota	Woesearchaeia	#N/A	#N/A	#N/A	#N/A	0.0234304	RF78	A571_o_NA	Non-fer
GU127420.1.925	3.85015	Nanoarchaeaeota	Woesearchaeia	uncultured euryarchaeote	uncultured euryarchaeote	uncultured euryarchaeote	uncultured euryarchaeote	0.0230952	RF79	A343_uncultured euryarchaeote	Non-fer
de255c166a278b7ad9e80fb0af27ae47	1.94591	Euryarchaeota	Thermoplasmata	uncultured	uncultured archaeon	uncultured archaeon	uncultured archaeon	0.0223012	RF80	A631_uncultured archaeon	Not differential
KP266474.1.990	3.52636	Euryarchaeota	Thermoplasmata	Methanomassiliicoccales	uncultured	uncultured bacterium	uncultured bacterium	0.0222817	RF81	A259_uncultured bacterium	Fer
9a5114b0318254e2794027973442f276	1.38629	Nanoarchaeaeota	Woesearchaeia	#N/A	#N/A	#N/A	#N/A	0.0216088	RF82	A358_o_NA	Not differential
7a772c20c0208dcd2219d867527d385e	5.92158	Crenarchaeota	Bathyarchaeia	uncultured marine crenarchaeote E6-3G	uncultured marine crenarchaeote E6-3G	uncultured marine crenarchaeote E6-3G	uncultured marine crenarchaeote E6-3G	0.0215389	RF83	A79_uncultured marine crenarchaeote E6-3G	Not differential
4bd7915f31bea25704032360b583afdc	3.29584	Nanoarchaeaeota	Woesearchaeia	uncultured archaeon	uncultured archaeon	uncultured archaeon	uncultured archaeon	0.0213065	RF84	A381_uncultured archaeon	Non-fer
GU129043.1.915	4.21951	Euryarchaeota	Methanobacteria	Methanobacteriales	Methanobacteriaceae	Methanobacterium	#N/A	0.0212207	RF85	A64_Methanobacterium	Not differential
JQ750560.1.904	2.48491	Crenarchaeota	Bathyarchaeia	uncultured archaeon Arc.171	uncultured archaeon Arc.171	uncultured archaeon Arc.171	uncultured archaeon Arc.171	0.0209819	RF86	A467_uncultured archaeon Arc.171	Not differential
014f910707aae4973e2754d1e61ab00a	4.06044	Crenarchaeota	Bathyarchaeia	uncultured Bathyarchaeota archaeon	uncultured Bathyarchaeota archaeon	uncultured Bathyarchaeota archaeon	uncultured Bathyarchaeota archaeon	0.0203865	RF87	A164_uncultured Bathyarchaeota archaeon	Non-fer
FJ174739.1.913	2.07944	Euryarchaeota	Thermoplasmata	Marine Group II	#N/A	#N/A	#N/A	0.0203446	RF88	A373_o_Marine Group II	Not differential
595825b99eeb68c019afd3e1ba1ce407	2.70805	Nanoarchaeaeota	Woesearchaeia	uncultured euryarchaeote	uncultured euryarchaeote	uncultured euryarchaeote	uncultured euryarchaeote	0.0203242	RF89	A429_uncultured euryarchaeote	Not differential
1d83e07b5b2209669ebee4181cb548c0	0.693147	Nanoarchaeaeota	Woesearchaeia	uncultured euryarchaeote	uncultured euryarchaeote	uncultured euryarchaeote	uncultured euryarchaeote	0.0200044	RF90	A428_uncultured euryarchaeote	Not differential
HQ330720.1.930	2.30259	Altiarchaeota	Altiarchaeia	uncultured archaeon	uncultured archaeon	uncultured archaeon	uncultured archaeon	0.0192048	RF91	A297_uncultured archaeon	Not differential
dfed5079d597fec914584ffb09c50de4	1.94591	Nanoarchaeaeota	Woesearchaeia	uncultured archaeon	uncultured archaeon	uncultured archaeon	uncultured archaeon	0.0188865	RF92	A545_uncultured archaeon	Not differential
5484c0a743e34d1aa0fcc32b7bc28c53	2.07944	Nanoarchaeaeota	Woesearchaeia	#N/A	#N/A	#N/A	#N/A	0.0187189	RF93	A565_o_NA	Not differential
KJ566452.1.954	5.82008	Thaumarchaeota	Nitrososphaeria	Nitrososphaerales	Nitrososphaeraceae	Candidatus Nitrocosmicus	#N/A	0.0186242	RF94	A39_Candidatus Nitrocosmicus	Non-fer
AB243793.1.1341	3.68888	Thaumarchaeota	Group 1.1c	uncultured crenarchaeote	uncultured crenarchaeote	uncultured crenarchaeote	uncultured crenarchaeote	0.0185377	RF95	A72_uncultured crenarchaeote	Not differential
AY454773.1.1068	5.00395	Euryarchaeota	Methanomicrobia	Methanosarcinales	Methanosarcinaceae	Methanosarcina	#N/A	0.0185124	RF96	A113_Methanosarcina	Not differential
JF304121.1.1439	4.8752	Euryarchaeota	Methanomicrobia	Methanosarcinales	Methanoperedenaceae	Candidatus Methanoperedens	#N/A	0.017996	RF97	A211_Candidatus Methanoperedens	Not differential
56f87d4b52d693f1197c9e65575dba82	3.61092	Nanoarchaeaeota	Woesearchaeia	#N/A	#N/A	#N/A	#N/A	0.0177747	RF98	A257_o_NA	Not differential
e5e2fca342090b90ff31bd1bbbbad358	2.89037	Nanoarchaeaeota	Woesearchaeia	uncultured archaeon	uncultured archaeon	uncultured archaeon	uncultured archaeon	0.0176042	RF99	A338_uncultured archaeon	Not differential
c83cff01dadd271de078fe9d1a6a093a	2.56495	Nanoarchaeaeota	Woesearchaeia	uncultured archaeon	uncultured archaeon	uncultured archaeon	uncultured archaeon	0.0174546	RF100	A483_uncultured archaeon	Non-fer
b17bd51d356d28eabc2fc05dff7968c3	1.79176	Nanoarchaeaeota	Woesearchaeia	uncultured euryarchaeote	uncultured euryarchaeote	uncultured euryarchaeote	uncultured euryarchaeote	0.0173503	RF101	A845_uncultured euryarchaeote	Not differential
2516faed48512a48589915f9780b2d66	1.09861	Nanoarchaeaeota	Woesearchaeia	uncultured archaeon	uncultured archaeon	uncultured archaeon	uncultured archaeon	0.0171929	RF102	A982_uncultured archaeon	Not differential
946ac6b8b610fce4cc3c28903a6d03ef	4.27667	Nanoarchaeaeota	Woesearchaeia	#N/A	#N/A	#N/A	#N/A	0.0167721	RF103	A220_o_NA	Non-fer
AB077227.1.1029	4.61512	Nanoarchaeaeota	Woesearchaeia	uncultured euryarchaeote	uncultured euryarchaeote	uncultured euryarchaeote	uncultured euryarchaeote	0.0166966	RF104	A215_uncultured euryarchaeote	Fer
fe090d3bf307b096f42a485757993f90	0.693147	Nanoarchaeaeota	Woesearchaeia	uncultured euryarchaeote	uncultured euryarchaeote	uncultured euryarchaeote	uncultured euryarchaeote	0.0163691	RF105	A1136_uncultured euryarchaeote	Not differential
f6bd08cae40de97a90a41f272b5f9027	1.94591	Nanoarchaeaeota	Woesearchaeia	uncultured archaeon	uncultured archaeon	uncultured archaeon	uncultured archaeon	0.0161564	RF106	A412_uncultured archaeon	Not differential
d2ec11a8fee0155ae72f6ebc5a6a32db	4.33073	Nanoarchaeaeota	Woesearchaeia	#N/A	#N/A	#N/A	#N/A	0.0161504	RF107	A116_o_NA	Non-fer
AB094558.1.906	5.85793	Crenarchaeota	Bathyarchaeia	uncultured methanogenic archaeon	uncultured methanogenic archaeon	uncultured methanogenic archaeon	uncultured methanogenic archaeon	0.01547	RF108	A71_uncultured methanogenic archaeon	Not differential
1f048afe3154a91323e2a34a4f136883	1.79176	Nanoarchaeaeota	Woesearchaeia	uncultured crenarchaeote	uncultured crenarchaeote	uncultured crenarchaeote	uncultured crenarchaeote	0.0152503	RF109	A494_uncultured crenarchaeote	Not differential
ff7269ee0495920de3905890d97c70c8	2.89037	Nanoarchaeaeota	Woesearchaeia	uncultured euryarchaeote	uncultured euryarchaeote	uncultured euryarchaeote	uncultured euryarchaeote	0.0149584	RF110	A546_uncultured euryarchaeote	Not differential
f071fb989161e752d5743c28e32bcba8	2.3979	Nanoarchaeaeota	Woesearchaeia	#N/A	#N/A	#N/A	#N/A	0.0148446	RF111	A535_o_NA	Not differential
JN649134.1.1045	6.82111	Euryarchaeota	Methanomicrobia	Methanosarcinales	Methanosaetaceae	Methanosaeta	#N/A	0.0147366	RF112	A51_Methanosaeta	Non-fer
096f63e1b4800850b92f7d4f349f41a6	2.48491	Nanoarchaeaeota	Woesearchaeia	#N/A	#N/A	#N/A	#N/A	0.014625	RF113	A638_o_NA	Not differential
f7375debc89fe2e074b2e43c70caba54	0.693147	Diapherotrites	Iainarchaeia	Iainarchaeales	Iainarchaeaceae	Candidatus Iainarchaeum	Candidatus Iainarchaeum andersonii SCGC AAA011-E11	0.0146214	RF114	A1130_Candidatus Iainarchaeum	Not differential
e455d6f571e618e37faeea014b9d07f2	0.693147	Nanoarchaeaeota	Woesearchaeia	uncultured euryarchaeote	uncultured euryarchaeote	uncultured euryarchaeote	uncultured euryarchaeote	0.0143927	RF115	A1122_uncultured euryarchaeote	Not differential
829e91d2d29d707d3080c149d38e9ca4	3.09104	Nanoarchaeaeota	Woesearchaeia	#N/A	#N/A	#N/A	#N/A	0.014184	RF116	A440_o_NA	Not differential
HQ269164.1.983	6.29157	Euryarchaeota	Methanomicrobia	Methanocellales	Methanocellaceae	Methanocella	uncultured Methanomicrobia archaeon	0.0141291	RF117	A59_Methanocella	Not differential
67ea09c038d538d4655298e8e6fd2910	2.70805	Nanoarchaeaeota	Woesearchaeia	uncultured euryarchaeote	uncultured euryarchaeote	uncultured euryarchaeote	uncultured euryarchaeote	0.0141115	RF118	A344_uncultured euryarchaeote	Not differential
KJ566435.1.986	2.07944	Nanoarchaeaeota	Woesearchaeia	uncultured euryarchaeote	uncultured euryarchaeote	uncultured euryarchaeote	uncultured euryarchaeote	0.0139822	RF119	A475_uncultured euryarchaeote	Not differential
18c2716507ed103c488a8e4e5def55ba	1.60944	Euryarchaeota	Thermoplasmata	Marine Group II	uncultured archaeon	uncultured archaeon	uncultured archaeon	0.0139388	RF120	A870_uncultured archaeon	Not differential
21eb885d20599a7efe0280eb6df4deee	3.63759	Nanoarchaeaeota	Woesearchaeia	#N/A	#N/A	#N/A	#N/A	0.0132554	RF121	A212_o_NA	Not differential
JF262378.1.1341	3.89182	Nanoarchaeaeota	Woesearchaeia	uncultured euryarchaeote	uncultured euryarchaeote	uncultured euryarchaeote	uncultured euryarchaeote	0.0131191	RF122	A189_uncultured euryarchaeote	Not differential
c7dbbf61e2289231f0a947be614cec37	1.79176	Nanoarchaeaeota	Woesearchaeia	#N/A	#N/A	#N/A	#N/A	0.0129548	RF123	A852_o_NA	Not differential
AB161349.1.938	2.48491	Asgardaeota	Odinarchaeia	uncultured crenarchaeote	uncultured crenarchaeote	uncultured crenarchaeote	uncultured crenarchaeote	0.0126549	RF124	A572_uncultured crenarchaeote	Not differential
HM244084.1.912	5.07517	Euryarchaeota	Methanomicrobia	Methanosarcinales	Methanoperedenaceae	Candidatus Methanoperedens	uncultured euryarchaeote	0.0125766	RF125	A88_Candidatus Methanoperedens	Not differential
ab12fc0ee2ee116fbbedcd0bb798209f	1.60944	Nanoarchaeaeota	Woesearchaeia	uncultured archaeon	uncultured archaeon	uncultured archaeon	uncultured archaeon	0.0122343	RF126	A895_uncultured archaeon	Not differential
d6399300dc7d13c619262450f5bf4895	1.09861	Nanoarchaeaeota	Woesearchaeia	uncultured euryarchaeote	uncultured euryarchaeote	uncultured euryarchaeote	uncultured euryarchaeote	0.0121983	RF127	A465_uncultured euryarchaeote	Non-fer
HM244037.1.938	5.0814	Crenarchaeota	Bathyarchaeia	uncultured euryarchaeote	uncultured euryarchaeote	uncultured euryarchaeote	uncultured euryarchaeote	0.012151	RF128	A95_uncultured euryarchaeote	Non-fer
HQ141808.1.942	4.41884	Thaumarchaeota	Nitrososphaeria	Nitrososphaerales	Nitrososphaeraceae	Candidatus Nitrocosmicus	#N/A	0.012069	RF129	A275_Candidatus Nitrocosmicus	Not differential
c6f28f6cf2383d7a0eaf27d504f8583f	2.94444	Nanoarchaeaeota	Woesearchaeia	uncultured euryarchaeote	uncultured euryarchaeote	uncultured euryarchaeote	uncultured euryarchaeote	0.012061	RF130	A312_uncultured euryarchaeote	Not differential
3a3a52ca94143e4a1c660481824d3e6b	1.38629	Nanoarchaeaeota	Woesearchaeia	uncultured archaeon	uncultured archaeon	uncultured archaeon	uncultured archaeon	0.0120331	RF131	A659_uncultured archaeon	Not differential
JX426866.1.952	3.09104	Nanoarchaeaeota	Woesearchaeia	uncultured archaeon	uncultured archaeon	uncultured archaeon	uncultured archaeon	0.0119763	RF132	A443_uncultured archaeon	Non-fer
JQ245962.1.931	1.09861	Hadesarchaeaeota	uncultured archaeon	uncultured archaeon	uncultured archaeon	uncultured archaeon	uncultured archaeon	0.0119713	RF133	A613_uncultured archaeon	Not differential
GU127433.1.924	1.79176	Nanoarchaeaeota	Woesearchaeia	uncultured euryarchaeote	uncultured euryarchaeote	uncultured euryarchaeote	uncultured euryarchaeote	0.0118625	RF134	A547_uncultured euryarchaeote	Not differential
KF641436.1.936	4.81218	Euryarchaeota	Methanomicrobia	Methanocellales	Methanocellaceae	Rice Cluster I	#N/A	0.0118254	RF135	A111_Rice Cluster I	Non-fer
ec4e017c4c208096fd8315116961eaa7	2.07944	Nanoarchaeaeota	Woesearchaeia	#N/A	#N/A	#N/A	#N/A	0.0117648	RF136	A758_o_NA	Not differential
KX463112.1.930	6.9921	Crenarchaeota	Bathyarchaeia	#N/A	#N/A	#N/A	#N/A	0.0116926	RF137	A32_o_NA	Non-fer
KJ424514.1.906	7.0184	Crenarchaeota	Bathyarchaeia	unidentified archaeon	unidentified archaeon	unidentified archaeon	unidentified archaeon	0.0116898	RF138	A1_unidentified archaeon	Not differential
AVSQ01000019.27413.28870	1.94591	Thaumarchaeota	Nitrososphaeria	Nitrosopumilales	Nitrosopumilaceae	Candidatus Nitrosotenuis	#N/A	0.0115646	RF139	A224_Candidatus Nitrosotenuis	Not differential
GU127515.1.928	1.09861	Hadesarchaeaeota	uncultured archaeon	uncultured archaeon	uncultured archaeon	uncultured archaeon	uncultured archaeon	0.0114981	RF140	A611_uncultured archaeon	Non-fer
33f0e2ed6ed4f86e94ab429464a44ddb	1.38629	Asgardaeota	Odinarchaeia	#N/A	#N/A	#N/A	#N/A	0.0114556	RF141	A922_o_NA	Non-fer
140ef946a8bb131a37efa0aea54d3ff8	2.70805	Nanoarchaeaeota	Woesearchaeia	uncultured archaeon	uncultured archaeon	uncultured archaeon	uncultured archaeon	0.0114139	RF142	A577_uncultured archaeon	Not differential
KF641385.1.936	6.07074	Euryarchaeota	Methanomicrobia	Methanosarcinales	Methanosarcinaceae	Methanosarcina	#N/A	0.0113994	RF143	A63_Methanosarcina	Fer
CP002551.1544045.1545529	5.15906	Euryarchaeota	Methanobacteria	Methanobacteriales	Methanobacteriaceae	Methanobacterium	#N/A	0.0113018	RF144	A47_Methanobacterium	Fer
b9d1d1eb9b2358b27345ec12dabc95ae	1.60944	Nanoarchaeaeota	Woesearchaeia	#N/A	#N/A	#N/A	#N/A	0.0111515	RF145	A491_o_NA	Not differential
6096c2ca89a452b82397006a0f7b8a08	1.38629	Nanoarchaeaeota	Woesearchaeia	uncultured euryarchaeote	uncultured euryarchaeote	uncultured euryarchaeote	uncultured euryarchaeote	0.0110826	RF146	A620_uncultured euryarchaeote	Not differential
bd5c99123fb8c0a629d261af597bebc6	4.49981	Euryarchaeota	Methanomicrobia	Methanosarcinales	Methanosaetaceae	Methanosaeta	#N/A	0.0109296	RF147	A101_Methanosaeta	Non-fer
a42569ebce5e08daa8456fd344df839e	1.38629	Nanoarchaeaeota	Woesearchaeia	uncultured archaeon	uncultured archaeon	uncultured archaeon	uncultured archaeon	0.0109056	RF148	A952_uncultured archaeon	Not differential
8b72b4e8c71e21ccb3c091c85a2ecc4c	2.3979	Nanoarchaeaeota	Woesearchaeia	#N/A	#N/A	#N/A	#N/A	0.0108023	RF149	A322_o_NA	Not differential
67dca6eb97495e90a5a4d1a6c46acbc5	1.09861	Nanoarchaeaeota	Woesearchaeia	uncultured archaeon	uncultured archaeon	uncultured archaeon	uncultured archaeon	0.0107529	RF150	A1001_uncultured archaeon	Not differential
4b978797da68d9c0577279487b328cc8	1.60944	Nanoarchaeaeota	Woesearchaeia	uncultured archaeon	uncultured archaeon	uncultured archaeon	uncultured archaeon	0.0106754	RF151	A553_uncultured archaeon	Not differential
05a300d68bd9cc70c3ff14fa6c2d819e	1.09861	Diapherotrites	Micrarchaeia	uncultured euryarchaeote	uncultured euryarchaeote	uncultured euryarchaeote	uncultured euryarchaeote	0.0105956	RF152	A231_uncultured euryarchaeote	Not differential
716ad04611ee32b889c9c329bc9b5209	3.13549	Nanoarchaeaeota	Woesearchaeia	#N/A	#N/A	#N/A	#N/A	0.0105731	RF153	A321_o_NA	Non-fer
c62ba1acc0fb190f5291428502484c54	2.30259	Nanoarchaeaeota	Woesearchaeia	uncultured archaeon	uncultured archaeon	uncultured archaeon	uncultured archaeon	0.0105453	RF154	A697_uncultured archaeon	Not differential
aea10c18b90441989e3048f7a9bc99df	0.693147	Crenarchaeota	Bathyarchaeia	#N/A	#N/A	#N/A	#N/A	0.0104042	RF155	A667_o_NA	Not differential
JN398012.1.1404	4.63473	Euryarchaeota	Methanomicrobia	Methanosarcinales	Methanosaetaceae	Methanosaeta	uncultured archaeon	0.010262	RF156	A40_Methanosaeta	Not differential
AF423187.1.1436	3.78419	Euryarchaeota	Methanomicrobia	Methanomicrobiales	Methanoregulaceae	Methanoregula	#N/A	0.0102536	RF157	A37_Methanoregula	Not differential
074f0aa12bf18782b47afdbb4d3e0f06	1.09861	Nanoarchaeaeota	Woesearchaeia	uncultured euryarchaeote	uncultured euryarchaeote	uncultured euryarchaeote	uncultured euryarchaeote	0.0102502	RF158	A709_uncultured euryarchaeote	Non-fer
2d06ddbd587ca854b3b5fb64e320d6cc	3.29584	Nanoarchaeaeota	Woesearchaeia	Candidatus Pacearchaeota archaeon RBG_19FT_COMBO_34_9	Candidatus Pacearchaeota archaeon RBG_19FT_COMBO_34_9	Candidatus Pacearchaeota archaeon RBG_19FT_COMBO_34_9	Candidatus Pacearchaeota archaeon RBG_19FT_COMBO_34_9	0.0102035	RF159	A237_Candidatus Pacearchaeota archaeon RBG_19FT_COMBO_34_9	Non-fer
FJ484288.1.1193	0.693147	Euryarchaeota	Thermoplasmata	uncultured	uncultured Thermoplasmata archaeon	uncultured Thermoplasmata archaeon	uncultured Thermoplasmata archaeon	0.0101547	RF160	A374_uncultured Thermoplasmata archaeon	Non-fer
a52646ac5d66a44825189233c9c1dc24	0.693147	Diapherotrites	Iainarchaeia	Iainarchaeales	Diapherotrites archaeon SCGC AAA011-K09	Diapherotrites archaeon SCGC AAA011-K09	Diapherotrites archaeon SCGC AAA011-K09	0.0100285	RF161	A842_Diapherotrites archaeon SCGC AAA011-K09	Not differential
aa4e24e4c51e92551d611c92082f73cc	1.60944	Nanoarchaeaeota	Woesearchaeia	#N/A	#N/A	#N/A	#N/A	0.010007	RF162	A894_o_NA	Non-fer
5d48e74e98bca715dfd658e4b8bc057d	4.54329	Euryarchaeota	Methanomicrobia	Methanosarcinales	Methanosarcinaceae	Methanosarcina	#N/A	0.00990696	RF163	A258_Methanosarcina	Not differential
KP784723.1.1440	2.70805	Euryarchaeota	Thermoplasmata	Methanomassiliicoccales	Methanomassiliicoccaceae	uncultured	uncultured archaeon	0.00980897	RF164	A597_uncultured	Not differential
EU155939.1.1456	4.85981	Euryarchaeota	Methanomicrobia	Methanomicrobiales	uncultured	#N/A	#N/A	0.00980528	RF165	A120_f_uncultured	Not differential
75d74502c1cac0996c5e05c327a4abeb	1.94591	Nanoarchaeaeota	Woesearchaeia	uncultured archaeon	uncultured archaeon	uncultured archaeon	uncultured archaeon	0.00963741	RF166	A470_uncultured archaeon	Non-fer
c03ea52a67f399bfdd29f009d7a9342a	4.63473	Nanoarchaeaeota	Woesearchaeia	#N/A	#N/A	#N/A	#N/A	0.00953374	RF167	A99_o_NA	Fer
CAJE01000013.27753.29188	3.7612	Euryarchaeota	Thermoplasmata	Methanomassiliicoccales	Methanomassiliicoccaceae	Methanomassiliicoccus	#N/A	0.00950716	RF168	A324_Methanomassiliicoccus	Non-fer
GQ926277.1.916	4.31749	Euryarchaeota	Methanomicrobia	Methanocellales	Methanocellaceae	Methanocella	#N/A	0.00937759	RF169	A281_Methanocella	Not differential
3ddac93adb31ca3299da499433f40de6	1.60944	Nanoarchaeaeota	Woesearchaeia	uncultured archaeon	uncultured archaeon	uncultured archaeon	uncultured archaeon	0.00936613	RF170	A876_uncultured archaeon	Not differential
AB639295.1.973	4.77068	Euryarchaeota	Thermoplasmata	Methanomassiliicoccales	Methanomassiliicoccaceae	Methanomassiliicoccus	#N/A	0.0092686	RF171	A92_Methanomassiliicoccus	Non-fer
MWBV01000002.35883.37325	2.07944	Nanoarchaeaeota	Woesearchaeia	Candidatus Diapherotrites archaeon ADurb.Bin253	Candidatus Diapherotrites archaeon ADurb.Bin253	Candidatus Diapherotrites archaeon ADurb.Bin253	Candidatus Diapherotrites archaeon ADurb.Bin253	0.00926673	RF172	A264_Candidatus Diapherotrites archaeon ADurb.Bin253	Not differential
603f0e37e9f3fc904adfd0e427ffa1f7	2.19722	Nanoarchaeaeota	Woesearchaeia	uncultured archaeon	uncultured archaeon	uncultured archaeon	uncultured archaeon	0.00903393	RF173	A554_uncultured archaeon	Not differential
82b374f3f2a9219d0e9c20a90f521823	1.38629	Nanoarchaeaeota	Woesearchaeia	uncultured euryarchaeote	uncultured euryarchaeote	uncultured euryarchaeote	uncultured euryarchaeote	0.00893789	RF174	A945_uncultured euryarchaeote	Not differential
KF564608.1.1438	2.83321	Euryarchaeota	Thermoplasmata	Methanomassiliicoccales	Methanomassiliicoccaceae	Methanomassiliicoccus	#N/A	0.00892364	RF175	A560_Methanomassiliicoccus	Non-fer
AB243810.1.1336	5.20949	Crenarchaeota	Bathyarchaeia	#N/A	#N/A	#N/A	#N/A	0.00879026	RF176	A45_o_NA	Not differential
1ccb5448eff82fa9f97d1a7f7ef5c9a6	0.693147	Diapherotrites	Iainarchaeia	Iainarchaeales	uncultured archaeon	uncultured archaeon	uncultured archaeon	0.00862223	RF177	A1057_uncultured archaeon	Non-fer
edea408129666a9de2d996b425845a87	2.30259	Nanoarchaeaeota	Woesearchaeia	archaeon GW2011_AR15	archaeon GW2011_AR15	archaeon GW2011_AR15	archaeon GW2011_AR15	0.00854194	RF178	A301_archaeon GW2011_AR15	Non-fer
AY487180.1.1048	2.70805	Euryarchaeota	Methanomicrobia	Methanocellales	Methanocellaceae	Rice Cluster I	uncultured euryarchaeote	0.00838094	RF179	A76_Rice Cluster I	Not differential
fd85264441b18e9e5398b1302201543e	0.693147	Nanoarchaeaeota	Woesearchaeia	#N/A	#N/A	#N/A	#N/A	0.00816978	RF180	A761_o_NA	Non-fer
8f8b706200f8099ea742a5a9d187e136	1.60944	Nanoarchaeaeota	Woesearchaeia	#N/A	#N/A	#N/A	#N/A	0.00816757	RF181	A886_o_NA	Non-fer
e77863a1b944736002c770deefa173ca	3.66356	Nanoarchaeaeota	Woesearchaeia	uncultured euryarchaeote	uncultured euryarchaeote	uncultured euryarchaeote	uncultured euryarchaeote	0.00814882	RF182	A166_uncultured euryarchaeote	Non-fer
DQ785499.1.918	4.27667	Euryarchaeota	Methanobacteria	Methanobacteriales	Methanobacteriaceae	Methanobacterium	Methanobacterium palustre	0.00809562	RF183	A161_Methanobacterium	Not differential
07ab3ef891d0f2b09d789ebae4889915	2.99573	Nanoarchaeaeota	Woesearchaeia	uncultured archaeon	uncultured archaeon	uncultured archaeon	uncultured archaeon	0.00807671	RF184	A511_uncultured archaeon	Not differential
ff796059f950fe33566cd9923efed4b6	0.693147	Nanoarchaeaeota	Woesearchaeia	#N/A	#N/A	#N/A	#N/A	0.00807079	RF185	A1137_o_NA	Non-fer
758cd643b7e5134814e1511d58836d8d	0.693147	Nanoarchaeaeota	Nanohaloarchaeia	Deep Sea Euryarchaeotic Group(DSEG)	uncultured archaeon	uncultured archaeon	uncultured archaeon	0.00806199	RF186	A940_uncultured archaeon	Not differential
7e57a1cb77d2c8e0699ca05baea90116	0.693147	Nanoarchaeaeota	Woesearchaeia	Candidatus Pacearchaeota archaeon RBG_19FT_COMBO_34_9	Candidatus Pacearchaeota archaeon RBG_19FT_COMBO_34_9	Candidatus Pacearchaeota archaeon RBG_19FT_COMBO_34_9	Candidatus Pacearchaeota archaeon RBG_19FT_COMBO_34_9	0.00804968	RF187	A1093_Candidatus Pacearchaeota archaeon RBG_19FT_COMBO_34_9	Non-fer
bcbe8d338c7a2f2b761a3672dc731b15	2.70805	Nanoarchaeaeota	Woesearchaeia	#N/A	#N/A	#N/A	#N/A	0.00802863	RF188	A588_o_NA	Not differential
4419ed9ecef70e39a2f074902253e44e	0.693147	Nanoarchaeaeota	Woesearchaeia	#N/A	#N/A	#N/A	#N/A	0.00799588	RF189	A320_o_NA	Non-fer
5d221367321ac1f4bb1987cd3235b64d	2.48491	Nanoarchaeaeota	Woesearchaeia	#N/A	#N/A	#N/A	#N/A	0.00789102	RF190	A238_o_NA	Not differential
3015d5caa15df1faf6a58bd9b067e1ad	2.48491	Nanoarchaeaeota	Woesearchaeia	#N/A	#N/A	#N/A	#N/A	0.00753095	RF191	A397_o_NA	Non-fer
34685ac63d12f445f24af3eec1ba05b4	0.693147	Nanoarchaeaeota	Woesearchaeia	#N/A	#N/A	#N/A	#N/A	0.00752827	RF192	A1068_o_NA	Not differential
4383f1a1dd3dbc714f1ec19602d3f6a4	2.99573	Altiarchaeota	Altiarchaeia	uncultured archaeon	uncultured archaeon	uncultured archaeon	uncultured archaeon	0.00751679	RF193	A277_uncultured archaeon	Fer
HM244333.1.916	0.693147	Euryarchaeota	Thermoplasmata	Marine Benthic Group D and DHVEG-1	uncultured Thermoplasmata archaeon	uncultured Thermoplasmata archaeon	uncultured Thermoplasmata archaeon	0.00732257	RF194	A484_uncultured Thermoplasmata archaeon	Non-fer
6ed37af461594d1317e4b444ba1ecdac	3.17805	Nanoarchaeaeota	Woesearchaeia	#N/A	#N/A	#N/A	#N/A	0.00728605	RF195	A193_o_NA	Non-fer
EU155923.1.1465	6.45834	Euryarchaeota	Methanomicrobia	Methanomicrobiales	Methanoregulaceae	Methanoregula	#N/A	0.00722461	RF196	A54_Methanoregula	Non-fer
8bd7d31a15878fe7517a494b1933e164	1.60944	Nanoarchaeaeota	Woesearchaeia	uncultured archaeon	uncultured archaeon	uncultured archaeon	uncultured archaeon	0.00718231	RF197	A885_uncultured archaeon	Not differential
24899cce93e46794b0ed354add86bb13	2.48491	Nanoarchaeaeota	Woesearchaeia	uncultured euryarchaeote	uncultured euryarchaeote	uncultured euryarchaeote	uncultured euryarchaeote	0.00716476	RF198	A379_uncultured euryarchaeote	Non-fer
00a7ed4916bbc87c48e148715d6e72af	1.79176	Nanoarchaeaeota	Woesearchaeia	#N/A	#N/A	#N/A	#N/A	0.00705647	RF199	A734_o_NA	Not differential
1b91825a52d7b0b37e84de40c55bbbe0	1.09861	Nanoarchaeaeota	Woesearchaeia	uncultured archaeon	uncultured archaeon	uncultured archaeon	uncultured archaeon	0.00705453	RF200	A980_uncultured archaeon	Non-fer
01471ce79269f37e56fb146e06d86298	2.48491	Nanoarchaeaeota	Woesearchaeia	uncultured euryarchaeote	uncultured euryarchaeote	uncultured euryarchaeote	uncultured euryarchaeote	0.00703666	RF201	A576_uncultured euryarchaeote	Not differential
9970301ef0a730d26b9bd68ced26346c	1.60944	Nanoarchaeaeota	Woesearchaeia	#N/A	#N/A	#N/A	#N/A	0.00693889	RF202	A333_o_NA	Not differential
9c36615684ea26b5bf2b89a91fcf5947	1.38629	Nanoarchaeaeota	Woesearchaeia	#N/A	#N/A	#N/A	#N/A	0.00692992	RF203	A950_o_NA	Not differential
EU519240.1.1018	2.48491	Euryarchaeota	Methanobacteria	Methanobacteriales	Methanobacteriaceae	Methanobacterium	#N/A	0.006894	RF204	A652_Methanobacterium	Not differential
EU155951.1.1441	6.04737	Euryarchaeota	Methanomicrobia	Methanosarcinales	Methanosaetaceae	Methanosaeta	uncultured archaeon	0.00687586	RF205	A66_Methanosaeta	Non-fer
6eb8c79358a6ef34260e9843bd0ff7d3	1.60944	Nanoarchaeaeota	Woesearchaeia	uncultured bacterium	uncultured bacterium	uncultured bacterium	uncultured bacterium	0.00686297	RF206	A689_uncultured bacterium	Not differential
11e2d41bebdefc90a6f4f6fcf17791d2	3.29584	Nanoarchaeaeota	Woesearchaeia	uncultured euryarchaeote	uncultured euryarchaeote	uncultured euryarchaeote	uncultured euryarchaeote	0.00672213	RF207	A449_uncultured euryarchaeote	Non-fer
a41b50831c9c0b288b6b06ade10e1555	2.70805	Euryarchaeota	Methanomicrobia	Methanosarcinales	Methanosaetaceae	Methanosaeta	#N/A	0.00665553	RF208	A585_Methanosaeta	Non-fer
c824caaae3915489ee86f8e2bb6bca90	4.02535	Nanoarchaeaeota	Woesearchaeia	#N/A	#N/A	#N/A	#N/A	0.00653922	RF209	A326_o_NA	Not differential
43f57ece11b1cd7d5bdfde1a4c911055	1.09861	Nanoarchaeaeota	Woesearchaeia	uncultured archaeon	uncultured archaeon	uncultured archaeon	uncultured archaeon	0.00639804	RF210	A992_uncultured archaeon	Not differential
2305478da6750833bcf4bc28490901a2	2.19722	Nanoarchaeaeota	Woesearchaeia	uncultured euryarchaeote	uncultured euryarchaeote	uncultured euryarchaeote	uncultured euryarchaeote	0.0063532	RF211	A309_uncultured euryarchaeote	Not differential
[truncated: 131 more rows]

## Sheet: Nutrient-poor_Fun
OTU	Abun	Phylum	Class	Order	Family	Genus	Species	MeanDecreaseGini	rank	OTU_id	Enriched
469b30e83472448f751f273d20e32a27	6.67203	#N/A	#N/A	#N/A	#N/A	#N/A	#N/A	0.326924	RF1	F145_o_NA	Fer
[truncated: 2,281 more rows]

## Sheet: Nutrient-rich_Bac
OTU	Abun	Phylum	Class	Order	Family	Genus	Species	MeanDecreaseGini	rank	OTU_id	Enriched
[truncated: 7,969 more rows]

[truncated: 2 more sheets: Nutrient-rich_Arch, Nutrient-rich_Fun]
