# Supplementary material for: Compositional Shift of Bacterial, Archaeal, and Fungal Communities Is Dependent on Trophic Lifestyles in Rice Paddy Soil
Source: Front Microbiol. 2021 Sep 1;12:719486. doi: 10.3389/fmicb.2021.719486 (PMC8440912; doi:10.3389/fmicb.2021.719486)
Supplement: Supplementary file 1 [file Data_Sheet_1.zip › Table 11.XLSX]

## Sheet: Content
Supplementary Table 11. Properties of microbial networks
Sheet	Content
OTUs and nodes	The numbers of OTUs used for constructing microbial networks and the numbers of nodes
Edge	Properties of edges in each microbial network
Network complexity	Quantitative complexity of microbial networks

## Sheet: OTUs and nodes
OTU numbers used in network construction
Non-fertilized	CJ1	CJ1_18	MY2	NJ2	YS1
Bacteria	3360	2121	3166	3031	3056
Archaea	143	90	126	167	158
Fungi	791	895	880	1133	1058
Fertilized	CJ2	CJ2_18	MY1	NJ1	YS2
Bacteria	2647	1686	2900	2880	2725
Archaea	111	57	111	181	105
Fungi	782	615	881	1286	939
Composition of nodes
Non-fertilized	CJ1	CJ1_18	MY2	NJ2	YS1
Bacteria	1728	1138	1655	1595	1606
Archaea	142	78	126	161	147
Fungi	559	614	535	720	678
Fertilized	CJ2	CJ2_18	MY1	NJ1	YS2
Bacteria	1417	953	1521	1554	1486
Archaea	106	50	109	179	96
Fungi	549	464	537	748	585

## Sheet: Edge
		Nutrient-poor environment									Nutrient-rich environment
Non-fertilized		CJ1			CJ1_18			YS1			MY2			NJ2
Association	Category	Count	Proportion	Ratio	Count	Proportion	Ratio	Count	Proportion	Ratio	Count	Proportion	Ratio	Count	Proportion	Ratio
B	negative	3215	0.0952	0.234	2692	0.154	0.496	4088	0.119	0.366	3923	0.118	0.306	3353	0.0906	0.278
	positive	10542	0.312	0.766	2731	0.156	0.504	7067	0.206	0.634	8913	0.268	0.694	8716	0.236	0.722
F	negative	789	0.0234	0.34	1177	0.0672	0.469	2263	0.0661	0.482	1689	0.0507	0.46	1945	0.0526	0.451
	positive	1532	0.0454	0.66	1332	0.076	0.531	2430	0.071	0.518	1980	0.0595	0.54	2364	0.0639	0.549
A	negative	14	0.000415	0.0265	31	0.00177	0.356	56	0.00164	0.148	34	0.00102	0.0912	36	0.000973	0.0649
	positive	514	0.0152	0.973	56	0.0032	0.644	323	0.00943	0.852	339	0.0102	0.909	519	0.014	0.935
BF	negative	4228	0.125	0.446	3473	0.198	0.489	5792	0.169	0.485	5117	0.154	0.503	5254	0.142	0.433
	positive	5249	0.155	0.554	3635	0.208	0.511	6150	0.18	0.515	5049	0.152	0.497	6880	0.186	0.567
AB	negative	484	0.0143	0.0814	624	0.0356	0.432	927	0.0271	0.217	693	0.0208	0.143	695	0.0188	0.123
	positive	5465	0.162	0.919	820	0.0468	0.568	3354	0.098	0.783	4148	0.125	0.857	4938	0.133	0.877
AF	negative	523	0.0155	0.302	404	0.0231	0.427	693	0.0202	0.388	564	0.0169	0.398	621	0.0168	0.271
	positive	1209	0.0358	0.698	542	0.0309	0.573	1094	0.032	0.612	852	0.0256	0.602	1668	0.0451	0.729
	Total negative	9253	0.274049	-	8401	0.479591	-	13819	0.403628	-	12020	0.36095	-	11904	0.321825	-
	Total positive	24511	0.725951	-	9116	0.520409	-	20418	0.596372	-	21281	0.63905	-	25085	0.678175	-
Fertilized		CJ2			CJ2_18			YS2			MY1			NJ1
Association	Category	Count	Proportion	Ratio	Count	Proportion	Ratio	Count	Proportion	Ratio	Count	Proportion	Ratio	Count	Proportion	Ratio
B	negative	3287	0.12	0.318	2414	0.177	0.504	4002	0.137	0.354	3005	0.109	0.269	3069	0.0832	0.269
	positive	7061	0.257	0.682	2375	0.174	0.496	7303	0.25	0.646	8171	0.295	0.731	8356	0.227	0.731
F	negative	1352	0.0493	0.424	721	0.0529	0.404	1632	0.0559	0.466	1196	0.0432	0.469	2230	0.0605	0.418
	positive	1833	0.0668	0.576	1062	0.0779	0.596	1868	0.064	0.534	1353	0.0489	0.531	3103	0.0841	0.582
A	negative	17	0.00062	0.0664	14	0.00103	0.412	12	0.000411	0.0667	17	0.000614	0.0612	35	0.000949	0.0505
	positive	239	0.00871	0.934	20	0.00147	0.588	168	0.00576	0.933	261	0.00943	0.939	658	0.0178	0.949
BF	negative	4040	0.147	0.444	2585	0.19	0.458	5487	0.188	0.523	4136	0.15	0.46	5075	0.138	0.44
	positive	5061	0.184	0.556	3060	0.224	0.542	5005	0.171	0.477	4852	0.175	0.54	6449	0.175	0.56
AB	negative	472	0.0172	0.145	431	0.0316	0.474	478	0.0164	0.173	422	0.0153	0.119	701	0.019	0.126
	positive	2779	0.101	0.855	479	0.0351	0.526	2279	0.0781	0.827	3138	0.113	0.881	4841	0.131	0.874
AF	negative	429	0.0156	0.331	223	0.0163	0.466	396	0.0136	0.413	392	0.0142	0.352	800	0.0217	0.338
	positive	868	0.0316	0.669	256	0.0188	0.534	562	0.0193	0.587	722	0.0261	0.648	1568	0.0425	0.662
	Total negative	9597	0.34977	-	6388	0.468328	-	12007	0.411311	-	9168	0.331393	-	11910	0.322895	-
	Total positive	17841	0.65023	-	7252	0.531672	-	17185	0.588689	-	18497	0.668607	-	24975	0.677105	-

## Sheet: Network complexity
	Field	Complexity index B (B)	Bertz complexity index	Distance Degree/Code Centric Indices
Non-fertilized	CJ1	8.1022	54375.9	10.501
	YS1	8.93515	54407	10.5537
	CJ1_18	5.83294	39237.6	10.0281
	MY2	8.86934	51455.6	10.4457
	NJ2	9.17404	55579.3	10.6195
Fertilized	CJ2	8.06111	45409.8	10.3666
	YS2	8.52069	47625.3	10.2802
	CJ2_18	0	30462	0
	MY1	7.64864	47794.2	10.438
	NJ1	9.14559	55708.5	10.5943
