# Supplementary material for: Compositional Shift of Bacterial, Archaeal, and Fungal Communities Is Dependent on Trophic Lifestyles in Rice Paddy Soil
Source: Front Microbiol. 2021 Sep 1;12:719486. doi: 10.3389/fmicb.2021.719486 (PMC8440912; doi:10.3389/fmicb.2021.719486)
Supplement: Supplementary file 1 [file Data_Sheet_1.zip › Table 12.XLSX]

## Sheet: Content
Supplementary Table 12. Degree, betweenness centrality, within-module connectivity, and among-module connectivity of bacterial, archaeal, and fungal nodes in microbial networks
Sheet	Content
Module hub	Count of module hubs and edges connected with module hubs in microbial co-occurrence networks
Nutrient-poor_CJ1_non-fer	Degree, betweenness centrality, within-module connectivity, and among-module connectivity of bacterial, archaeal, and fungal nodes in microbial networks of CJ1 field (non-fertilized and nutrient-poor)
Nutrient-poor_CJ2_fer	Degree, betweenness centrality, within-module connectivity, and among-module connectivity of bacterial, archaeal, and fungal nodes in microbial networks of CJ2 field (fertilized and nutrient-poor)
Nutrient-poor_YS1_non-fer	Degree, betweenness centrality, within-module connectivity, and among-module connectivity of bacterial, archaeal, and fungal nodes in microbial networks of YS1 field (non-fertilized and nutrient-poor)
Nutrient-poor_YS2_fer	Degree, betweenness centrality, within-module connectivity, and among-module connectivity of bacterial, archaeal, and fungal nodes in microbial networks of YS2 field (fertilized and nutrient-poor)
Nutrient-poor_CJ1(2018)_non-fer	Degree, betweenness centrality, within-module connectivity, and among-module connectivity of bacterial, archaeal, and fungal nodes in microbial networks of CJ1 (2018) field (non-fertilized and nutrient-poor)
Nutrient-poor_CJ2(2018)_fer	Degree, betweenness centrality, within-module connectivity, and among-module connectivity of bacterial, archaeal, and fungal nodes in microbial networks of CJ2 (2018) field (fertilized and nutrient-poor)
Nutrient-rich_MY1_fer	Degree, betweenness centrality, within-module connectivity, and among-module connectivity of bacterial, archaeal, and fungal nodes in microbial networks of MY1 field (fertilized and nutrient-rich)
Nutrient-rich_MY2_non-fer	Degree, betweenness centrality, within-module connectivity, and among-module connectivity of bacterial, archaeal, and fungal nodes in microbial networks of MY2 field (non-fertilized and nutrient-rich)
Nutrient-rich_NJ1_fer	Degree, betweenness centrality, within-module connectivity, and among-module connectivity of bacterial, archaeal, and fungal nodes in microbial networks of NJ1 field (fertilized and nutrient-rich)
Nutrient-rich_NJ2_non-fer	Degree, betweenness centrality, within-module connectivity, and among-module connectivity of bacterial, archaeal, and fungal nodes in microbial networks of NJ2 field (non-fertilized and nutrient-rich)

## Sheet: Module hub
	Field	Number of module hubs	Oligotrophic module hubs	Sum of edges of oligotrophic module hubs	Copiotrophic module hubs	Sum of edges of copiotrophic module hubs
Non-fertilized	CJ1	47	21	2793	8	799
	YS1	79	24	2781	20	2349
	CJ1_18	62	36	3063	9	867
	MY2	69	8	1008	28	3410
	NJ2	73	20	2262	22	2916
Fertilized	CJ2	72	19	2201	24	2466
	YS2	74	9	1060	31	3443
	CJ2_18	45	25	1948	9	624
	MY1	66	6	687	28	3285
	NJ1	72	14	1790	20	2396

## Sheet: Nutrient-poor_CJ1_non-fer
OTU	OTU_id	Degree	Betweenness	Pi	zi	category	Role	Kingdom	Phylum	Class	Order	Family	Genus	Species
FPLS01006203.16.1519	B5748_Chryseolinea	3	1.29745e-06	0.666667	-1.93783	#N/A	Connector	Bacteria	Bacteroidetes	Bacteroidia	Cytophagales	Microscillaceae	Chryseolinea	uncultured Cytophagaceae bacterium
SH117088.07FU_FJ426996_refs	F30_f_Didymellaceae	41	0.003142	0.623438	0.181049	Copio	Connector	Fungi	Ascomycota	Dothideomycetes	Pleosporales	Didymellaceae	#N/A	#N/A
ef81ea031e8481795799fde814eacb5b	F1278_o_NA	13	0.0018198	0.639053	-0.952184	Copio	Connector	Fungi	#N/A	#N/A	#N/A	#N/A	#N/A	#N/A
SH203624.07FU_KF673598_reps	F32_Dimorphospora	175	0.0106432	0.382041	2.65671	#N/A	Module hub	Fungi	Ascomycota	Leotiomycetes	Helotiales	Helotiaceae	Dimorphospora	unidentified
KJ424514.1.906	A1_unidentified archaeon	167	0.0111419	0.237513	2.98335	#N/A	Module hub	Archaea	Crenarchaeota	Bathyarchaeia	unidentified archaeon	unidentified archaeon	unidentified archaeon	unidentified archaeon
cc03b165582d509db5dfc98edc91285d	B273_uncultured bacterium	160	0.01289	0.209297	2.89837	#N/A	Module hub	Bacteria	Chloroflexi	Anaerolineae	RBG-13-54-9	uncultured bacterium	uncultured bacterium	uncultured bacterium
MGQB01000003.898.2462	B90_uncultured	155	0.0170185	0.195297	3.4631	#N/A	Module hub	Bacteria	Proteobacteria	Deltaproteobacteria	Syntrophobacterales	Syntrophobacteraceae	uncultured	Deltaproteobacteria bacterium RBG_13_43_22
EU132113.1.1365	B85_o_Subgroup 7	153	0.0371129	0.207612	3.75196	#N/A	Module hub	Bacteria	Acidobacteria	Holophagae	Subgroup 7	#N/A	#N/A	#N/A
HM244084.1.912	A88_Candidatus Methanoperedens	149	0.00390822	0.181073	2.69677	#N/A	Module hub	Archaea	Euryarchaeota	Methanomicrobia	Methanosarcinales	Methanoperedenaceae	Candidatus Methanoperedens	uncultured euryarchaeote
5d48e74e98bca715dfd658e4b8bc057d	A258_Methanosarcina	148	0.00637759	0.192841	2.63945	#N/A	Module hub	Archaea	Euryarchaeota	Methanomicrobia	Methanosarcinales	Methanosarcinaceae	Methanosarcina	#N/A
HQ141808.1.942	A275_Candidatus Nitrocosmicus	144	0.0067384	0.186632	2.55348	#N/A	Module hub	Archaea	Thaumarchaeota	Nitrososphaeria	Nitrososphaerales	Nitrososphaeraceae	Candidatus Nitrocosmicus	#N/A
9960471b1f159aa7e3349956ff7ca5fd	F11_unidentified	140	0.0442719	0.328469	2.64966	#N/A	Module hub	Fungi	Ascomycota	Sordariomycetes	Sordariales	unidentified	unidentified	unidentified
c8b10c9cba600c14feec85847c5dcec6	F528_o_NA	138	0.0314385	0.314745	2.90504	#N/A	Module hub	Fungi	#N/A	#N/A	#N/A	#N/A	#N/A	#N/A
f3d00c6da020251da18f97c076983fe6	F364_o_NA	131	0.0143151	0.10116	3.07723	#N/A	Module hub	Fungi	#N/A	#N/A	#N/A	#N/A	#N/A	#N/A
DQ301885.1.1047	A86_Candidatus Methanoperedens	126	0.0095689	0.221718	2.96113	#N/A	Module hub	Archaea	Euryarchaeota	Methanomicrobia	Methanosarcinales	Methanoperedenaceae	Candidatus Methanoperedens	uncultured euryarchaeote
KX463112.1.930	A32_o_NA	117	0.0228244	0.15633	3.18835	#N/A	Module hub	Archaea	Crenarchaeota	Bathyarchaeia	#N/A	#N/A	#N/A	#N/A
JN810750.1.917	A42_Methanosarcina	115	0.00704923	0.173006	2.74481	#N/A	Module hub	Archaea	Euryarchaeota	Methanomicrobia	Methanosarcinales	Methanosarcinaceae	Methanosarcina	#N/A
EU155970.1.1442	A115_Methanocella	99	0.00491418	0.0775431	2.66486	#N/A	Module hub	Archaea	Euryarchaeota	Methanomicrobia	Methanocellales	Methanocellaceae	Methanocella	uncultured euryarchaeote
SH219102.07FU_EU364859_reps	F23_f_Nectriaceae	60	0.00708107	0	3.54123	#N/A	Module hub	Fungi	Ascomycota	Sordariomycetes	Hypocreales	Nectriaceae	#N/A	#N/A
1f0dbef81778dcc3c8915a9753db8ad3	F115_unidentified	50	0.00303787	0.0392	2.61718	#N/A	Module hub	Fungi	Rozellomycota	unidentified	unidentified	unidentified	unidentified	unidentified
2e8bc1b5e749a2f0ec6111c0385ab6f5	F40_o_NA	48	0.00398753	0	2.53317	#N/A	Module hub	Fungi	#N/A	#N/A	#N/A	#N/A	#N/A	#N/A
EF019237.1.1345	B101_o_S085	186	0.0104771	0.349636	3.0553	Oligo	Module hub	Bacteria	Chloroflexi	Dehalococcoidia	S085	#N/A	#N/A	#N/A
EF018230.1.1367	B130_uncultured	185	0.009585	0.362542	2.96989	Oligo	Module hub	Bacteria	Gemmatimonadetes	Gemmatimonadetes	Gemmatimonadales	Gemmatimonadaceae	uncultured	#N/A
cff712c9fc6c4478e34bd32ef3d9ae2c	F1253_o_NA	180	0.0186549	0.357778	2.88448	Oligo	Module hub	Fungi	#N/A	#N/A	#N/A	#N/A	#N/A	#N/A
1792a4edde1096fe1b10153d760eaa0b	F645_unidentified	177	0.0174495	0.281528	3.06933	Oligo	Module hub	Fungi	unidentified	unidentified	unidentified	unidentified	unidentified	unidentified
AB252886.1.1502	B23_uncultured	166	0.0406496	0.325737	3.7543	Oligo	Module hub	Bacteria	Proteobacteria	Gammaproteobacteria	Steroidobacterales	Steroidobacteraceae	uncultured	uncultured gamma proteobacterium
KY445660.1.1519	B107_f_Micrococcaceae	160	0.00461383	0.312422	2.62824	Oligo	Module hub	Bacteria	Actinobacteria	Actinobacteria	Micrococcales	Micrococcaceae	#N/A	#N/A
b317150d3d5dbdbd4a79acc8d1e44f74	F590_unidentified	157	0.00845248	0.451458	2.86919	Oligo	Module hub	Fungi	unidentified	unidentified	unidentified	unidentified	unidentified	unidentified
SH180120.07FU_FN397388_reps	F70_Mortierella	155	0.0189027	0.296025	2.50488	Oligo	Module hub	Fungi	Mortierellomycota	Mortierellomycetes	Mortierellales	Mortierellaceae	Mortierella	Mortierella_elongata
EU266783.1.1493	B214_Sulfurifustis	154	0.0266186	0.0984989	3.80079	Oligo	Module hub	Bacteria	Proteobacteria	Gammaproteobacteria	Acidiferrobacterales	Acidiferrobacteraceae	Sulfurifustis	uncultured Thiotrichaceae bacterium
JF266532.1.1357	B212_f_SC-I-84	152	0.0227942	0.238141	3.23847	Oligo	Module hub	Bacteria	Proteobacteria	Gammaproteobacteria	Betaproteobacteriales	SC-I-84	#N/A	#N/A
846e816922cb2dc79fbbd18371ebb496	B1723_o_NA	150	0.0172591	0.200978	3.30265	Oligo	Module hub	Bacteria	Chloroflexi	Anaerolineae	#N/A	#N/A	#N/A	#N/A
FJ592887.1.1369	B453_uncultured bacterium	143	0.0121605	0.22006	3.04593	Oligo	Module hub	Bacteria	Bacteroidetes	Ignavibacteria	OPB56	uncultured bacterium	uncultured bacterium	uncultured bacterium
4cb7bc3e3cd1fff8edf8e88da7de7b4d	F389_o_NA	142	0.0176847	0.299147	2.75712	Oligo	Module hub	Fungi	#N/A	#N/A	#N/A	#N/A	#N/A	#N/A
KX753105.1.1454	B250_o_NA	129	0.0317446	0.193498	3.44415	Oligo	Module hub	Bacteria	Chloroflexi	Gitt-GS-136	#N/A	#N/A	#N/A	#N/A
EF589964.1.1344	B404_o_Subgroup 2	124	0.0245309	0.224766	3.1714	Oligo	Module hub	Bacteria	Acidobacteria	Acidobacteriia	Subgroup 2	#N/A	#N/A	#N/A
EF552191.1.1046	A93_Methanosarcina	116	0.0109311	0.157551	2.72861	Oligo	Module hub	Archaea	Euryarchaeota	Methanomicrobia	Methanosarcinales	Methanosarcinaceae	Methanosarcina	#N/A
EU155951.1.1441	A66_Methanosaeta	114	0.0031808	0.083872	2.5325	Oligo	Module hub	Archaea	Euryarchaeota	Methanomicrobia	Methanosarcinales	Methanosaetaceae	Methanosaeta	uncultured archaeon
e9986cb3fb7e0b16a29687c92ddd371d	F1020_o_NA	54	0.00543792	0.10631	2.78519	Oligo	Module hub	Fungi	#N/A	#N/A	#N/A	#N/A	#N/A	#N/A
JX223906.1.1390	B939_Rhodoferax	50	0.00336912	0.0392	2.61718	Oligo	Module hub	Bacteria	Proteobacteria	Gammaproteobacteria	Betaproteobacteriales	Burkholderiaceae	Rhodoferax	#N/A
540ddac61ba865b84ab0d8060068b14e	F102_o_NA	50	0.00464942	0.0392	2.61718	Oligo	Module hub	Fungi	#N/A	#N/A	#N/A	#N/A	#N/A	#N/A
EF043525.1.1091	A12_Methanobacterium	49	0.00633096	0.0399833	2.53317	Oligo	Module hub	Archaea	Euryarchaeota	Methanobacteria	Methanobacteriales	Methanobacteriaceae	Methanobacterium	#N/A
JN417532.1.1488	B19_uncultured soil bacterium	186	0.0135264	0.312175	3.22613	Copio	Module hub	Bacteria	Chloroflexi	Anaerolineae	SJA-15	uncultured soil bacterium	uncultured soil bacterium	uncultured soil bacterium
f37ab667a0b195afb9e98abebb786102	F88_unidentified	164	0.0190462	0.251562	2.87026	Copio	Module hub	Fungi	unidentified	unidentified	unidentified	unidentified	unidentified	unidentified
EU155991.1.1465	A11_unidentified archaeon	128	0.00917501	0.0893555	2.94966	Copio	Module hub	Archaea	Crenarchaeota	Bathyarchaeia	unidentified archaeon	unidentified archaeon	unidentified archaeon	unidentified archaeon
db18f6e3fb4df791ea6af4ba6fed791a	F82_Schizothecium	92	0.0101668	0.499055	2.53317	Copio	Module hub	Fungi	Ascomycota	Sordariomycetes	Sordariales	Lasiosphaeriaceae	Schizothecium	Schizothecium_glutinans
2c9a20bb0e44497e8ff8d6382314c0ea	F51_o_Helotiales	62	0.00279738	0.349636	2.53317	Copio	Module hub	Fungi	Ascomycota	Leotiomycetes	Helotiales	#N/A	#N/A	#N/A
SH530128.07FU_HG936987_reps	F14_Pyrenochaetopsis	58	0.00475715	0.130202	3.0372	Copio	Module hub	Fungi	Ascomycota	Dothideomycetes	Pleosporales	Cucurbitariaceae	Pyrenochaetopsis	Pyrenochaetopsis_leptospora
JX504958.1.1412	B26_f_Xanthobacteraceae	55	0.00545738	0.0357025	3.0372	Copio	Module hub	Bacteria	Proteobacteria	Alphaproteobacteria	Rhizobiales	Xanthobacteraceae	#N/A	#N/A
SH212602.07FU_KT160857_reps	F7_Cladosporium	54	0.00345418	0.139918	2.70118	Copio	Module hub	Fungi	Ascomycota	Dothideomycetes	Capnodiales	Cladosporiaceae	Cladosporium	Cladosporium_exasperatum
29040fee280070a358316ef50f36b594	F252_unidentified	147	0.0036323	0.348188	2.20117	#N/A	Peripheral	Fungi	unidentified	unidentified	unidentified	unidentified	unidentified	unidentified
e3702acbb12516981749077eb0e4a33d	F13_Schizothecium	138	0.0106319	0.363894	1.86568	#N/A	Peripheral	Fungi	Ascomycota	Sordariomycetes	Sordariales	Lasiosphaeriaceae	Schizothecium	Schizothecium_glutinans
9d595d4e6842706ba27ed84297cdc62e	F137_o_NA	137	0.00772866	0.436038	2.19715	#N/A	Peripheral	Fungi	#N/A	#N/A	#N/A	#N/A	#N/A	#N/A
SH184185.07FU_FJ624258_reps	F193_unidentified	135	0.00710632	0.243841	2.19571	#N/A	Peripheral	Fungi	Ascomycota	Dothideomycetes	Pleosporales	Sporormiaceae	unidentified	unidentified
KX077526.1.909	A50_Candidatus Methanoperedens	134	0.00495224	0.232569	2.19571	#N/A	Peripheral	Archaea	Euryarchaeota	Methanomicrobia	Methanosarcinales	Methanoperedenaceae	Candidatus Methanoperedens	#N/A
JF304121.1.1439	A211_Candidatus Methanoperedens	132	0.00190108	0.267562	2.11576	#N/A	Peripheral	Archaea	Euryarchaeota	Methanomicrobia	Methanosarcinales	Methanoperedenaceae	Candidatus Methanoperedens	#N/A
AY454773.1.1068	A113_Methanosarcina	130	0.0035631	0.192189	2.19571	#N/A	Peripheral	Archaea	Euryarchaeota	Methanomicrobia	Methanosarcinales	Methanosarcinaceae	Methanosarcina	#N/A
36b90279dc9446ec9bdb8529467c6e44	B597_o_NA	121	0.00115402	0.109009	2.12361	#N/A	Peripheral	Bacteria	Acidobacteria	Subgroup 6	#N/A	#N/A	#N/A	#N/A
9514def78ee03440e5de68c8f1b9a10d	A136_o_NA	114	0.000967952	0.188366	1.85952	#N/A	Peripheral	Archaea	Thaumarchaeota	Marine Benthic Group A	#N/A	#N/A	#N/A	#N/A
fdc84ae501129178651f17c4a46c40a3	F578_o_NA	113	0.00986123	0.116219	2.48522	#N/A	Peripheral	Fungi	Basidiomycota	Agaricomycetes	#N/A	#N/A	#N/A	#N/A
SH093056.07FU_AY228114_refs_sinGleTon	F1150_Pseudallescheria	113	0.000437031	0.0845798	1.95166	#N/A	Peripheral	Fungi	Ascomycota	Sordariomycetes	Microascales	Microascaceae	Pseudallescheria	#N/A
c6f28f6cf2383d7a0eaf27d504f8583f	A312_uncultured euryarchaeote	110	0.00127349	0.150248	1.75105	#N/A	Peripheral	Archaea	Nanoarchaeaeota	Woesearchaeia	uncultured euryarchaeote	uncultured euryarchaeote	uncultured euryarchaeote	uncultured euryarchaeote
b75f80fe7dc6e4726b261b5c97608854	A112_o_NA	109	0.00070208	0.210083	1.68869	#N/A	Peripheral	Archaea	Nanoarchaeaeota	Woesearchaeia	#N/A	#N/A	#N/A	#N/A
EU888342.1.909	A302_Candidatus Nitrocosmicus	108	0.00288509	0.0713306	2.41944	#N/A	Peripheral	Archaea	Thaumarchaeota	Nitrososphaeria	Nitrososphaerales	Nitrososphaeraceae	Candidatus Nitrocosmicus	#N/A
3d34bb40fa0f495576f3a592f59e3ce6	B1716_ADurb.Bin063-1	108	0.00140323	0.121228	1.75105	#N/A	Peripheral	Bacteria	Verrucomicrobia	Verrucomicrobiae	Pedosphaerales	Pedosphaeraceae	ADurb.Bin063-1	#N/A
CP001661.3772441.3773983	B2590_Geobacter	108	0.00204452	0.0363512	2.48522	#N/A	Peripheral	Bacteria	Proteobacteria	Deltaproteobacteria	Desulfuromonadales	Geobacteraceae	Geobacter	#N/A
JF175413.1.1350	B596_Massilia	107	0.000548768	0.199144	1.66022	#N/A	Peripheral	Bacteria	Proteobacteria	Gammaproteobacteria	Betaproteobacteriales	Burkholderiaceae	Massilia	#N/A
KP784723.1.1440	A597_uncultured	105	0.000274997	0.156735	1.63359	#N/A	Peripheral	Archaea	Euryarchaeota	Thermoplasmata	Methanomassiliicoccales	Methanomassiliicoccaceae	uncultured	uncultured archaeon
AF407700.1.1564	B953_o_NA	102	0.00044048	0.222414	1.48939	#N/A	Peripheral	Bacteria	Proteobacteria	Deltaproteobacteria	#N/A	#N/A	#N/A	#N/A
EF018903.1.1418	B173_ADurb.Bin063-1	101	0.00121976	0.145868	1.54927	#N/A	Peripheral	Bacteria	Verrucomicrobia	Verrucomicrobiae	Pedosphaerales	Pedosphaeraceae	ADurb.Bin063-1	#N/A
a2cfa8886b0b3c720ece0a11006be476	A453_uncultured euryarchaeote	100	0.000298915	0.1958	1.48939	#N/A	Peripheral	Archaea	Crenarchaeota	Bathyarchaeia	uncultured euryarchaeote	uncultured euryarchaeote	uncultured euryarchaeote	uncultured euryarchaeote
EF019272.1.1358	B238_f_uncultured	100	0.00101603	0.18	1.46495	#N/A	Peripheral	Bacteria	Actinobacteria	Actinobacteria	Frankiales	uncultured	#N/A	#N/A
3755dbef319dc64f7ea5039265f6628c	F692_unidentified	100	0.00401987	0.095	2.34044	#N/A	Peripheral	Fungi	Ascomycota	Dothideomycetes	Pleosporales	Sporormiaceae	unidentified	unidentified
ff7269ee0495920de3905890d97c70c8	A546_uncultured euryarchaeote	99	0.000186302	0.131415	1.52116	#N/A	Peripheral	Archaea	Nanoarchaeaeota	Woesearchaeia	uncultured euryarchaeote	uncultured euryarchaeote	uncultured euryarchaeote	uncultured euryarchaeote
a2cf1710c55459b487c3934d3c02ed92	F558_unidentified	99	0.0150352	0.361188	1.73532	#N/A	Peripheral	Fungi	unidentified	unidentified	unidentified	unidentified	unidentified	unidentified
096f63e1b4800850b92f7d4f349f41a6	A638_o_NA	97	0.000883768	0.184929	1.38063	#N/A	Peripheral	Archaea	Nanoarchaeaeota	Woesearchaeia	#N/A	#N/A	#N/A	#N/A
8956d8cc5a4d41c3974d38dae7052326	F242_o_NA	97	0.0114407	0.232118	-0.406982	#N/A	Peripheral	Fungi	Basidiomycota	Microbotryomycetes	#N/A	#N/A	#N/A	#N/A
SH190975.07FU_AB425974_refs	F245_Plectosphaerella	97	0.00580639	0.33925	1.0346	#N/A	Peripheral	Fungi	Ascomycota	Sordariomycetes	Glomerellales	Plectosphaerellaceae	Plectosphaerella	Plectosphaerella_cucumerina
07ab3ef891d0f2b09d789ebae4889915	A511_uncultured archaeon	96	0.000339382	0.0605469	1.52179	#N/A	Peripheral	Archaea	Nanoarchaeaeota	Woesearchaeia	uncultured archaeon	uncultured archaeon	uncultured archaeon	uncultured archaeon
4383f1a1dd3dbc714f1ec19602d3f6a4	A277_uncultured archaeon	96	0.000123061	0.117188	1.46495	#N/A	Peripheral	Archaea	Altiarchaeota	Altiarchaeia	uncultured archaeon	uncultured archaeon	uncultured archaeon	uncultured archaeon
EF451637.1.1317	B1080_Sphingomonas	96	0.000166855	0.117188	1.46495	#N/A	Peripheral	Bacteria	Proteobacteria	Alphaproteobacteria	Sphingomonadales	Sphingomonadaceae	Sphingomonas	#N/A
KX753092.1.1485	B2022_Massilia	96	0.00152525	0.0407986	2.09054	#N/A	Peripheral	Bacteria	Proteobacteria	Gammaproteobacteria	Betaproteobacteriales	Burkholderiaceae	Massilia	#N/A
FPLL01001877.15.1485	B879_metagenome	95	0.00142974	0.0806648	1.95488	#N/A	Peripheral	Bacteria	Chloroflexi	KD4-96	metagenome	metagenome	metagenome	metagenome
657cf68e34455bdc5bc60c9d80e7d153	A416_uncultured euryarchaeote	94	0.00153721	0.0617927	1.95488	#N/A	Peripheral	Archaea	Nanoarchaeaeota	Woesearchaeia	uncultured euryarchaeote	uncultured euryarchaeote	uncultured euryarchaeote	uncultured euryarchaeote
41c5943c94d2cf34647b0ee2593d6144	F56_o_NA	94	0.00567593	0.480534	1.44112	#N/A	Peripheral	Fungi	#N/A	#N/A	#N/A	#N/A	#N/A	#N/A
2ffe8c1601302543c1151faf7473452b	A123_o_NA	93	0.00262673	0.120708	1.82652	#N/A	Peripheral	Archaea	Nanoarchaeaeota	Woesearchaeia	#N/A	#N/A	#N/A	#N/A
AM072419.1.1316	B632_Haliangium	92	0.000560787	0.121928	1.35253	#N/A	Peripheral	Bacteria	Proteobacteria	Deltaproteobacteria	Myxococcales	Haliangiaceae	Haliangium	uncultured prokaryote
EU134565.1.1362	B4112_Geobacter	92	0.00039201	0.272921	1.14774	#N/A	Peripheral	Bacteria	Proteobacteria	Deltaproteobacteria	Desulfuromonadales	Geobacteraceae	Geobacter	#N/A
AB364730.1.1482	B766_Syntrophobacter	91	0.000222472	0.103852	1.32118	#N/A	Peripheral	Bacteria	Proteobacteria	Deltaproteobacteria	Syntrophobacterales	Syntrophobacteraceae	Syntrophobacter	uncultured Syntrophobacter sp.
9c35ff5ca0dcb9cc8f7123f8531a2911	A368_o_NA	90	0.00133799	0.0434568	1.89321	#N/A	Peripheral	Archaea	Nanoarchaeaeota	Woesearchaeia	#N/A	#N/A	#N/A	#N/A
AB552893.1.1393	B846_Acidovorax	90	0.000126543	0.0849383	1.35253	#N/A	Peripheral	Bacteria	Proteobacteria	Gammaproteobacteria	Betaproteobacteriales	Burkholderiaceae	Acidovorax	#N/A
JN540185.1.1476	B336_o_NA	90	6.53022e-05	0.104938	1.32442	#N/A	Peripheral	Bacteria	Acidobacteria	Subgroup 6	#N/A	#N/A	#N/A	#N/A
7f5fe809055aa857035a683e0884e3b9	F2152_unidentified	90	0.00174916	0.143457	1.26821	#N/A	Peripheral	Fungi	unidentified	unidentified	unidentified	unidentified	unidentified	unidentified
EF061943.1.1516	B3693_o_NA	89	0.00113871	0.0439338	1.86032	#N/A	Peripheral	Bacteria	Acidobacteria	Subgroup 6	#N/A	#N/A	#N/A	#N/A
4959e71569bf91e5d8d50a3e5b290622	F1491_unidentified	89	0.000604921	0.0439338	1.82652	#N/A	Peripheral	Fungi	Rozellomycota	unidentified	unidentified	unidentified	unidentified	unidentified
JF114904.1.1337	B669_Marmoricola	88	0.000254681	0.0444215	1.32118	#N/A	Peripheral	Bacteria	Actinobacteria	Actinobacteria	Propionibacteriales	Nocardioidaceae	Marmoricola	#N/A
56f87d4b52d693f1197c9e65575dba82	A257_o_NA	87	0.00276345	0.0665874	2.28249	#N/A	Peripheral	Archaea	Nanoarchaeaeota	Woesearchaeia	#N/A	#N/A	#N/A	#N/A
e5e2fca342090b90ff31bd1bbbbad358	A338_uncultured archaeon	85	0.00112773	0.0680969	1.88169	#N/A	Peripheral	Archaea	Nanoarchaeaeota	Woesearchaeia	uncultured archaeon	uncultured archaeon	uncultured archaeon	uncultured archaeon
AB486378.1.1395	B581_o_Subgroup 7	85	0.000221425	0.110727	1.14923	#N/A	Peripheral	Bacteria	Acidobacteria	Holophagae	Subgroup 7	#N/A	#N/A	#N/A
AB672159.1.1453	B1083_Dinghuibacter	85	0.000139115	0.170519	1.14774	#N/A	Peripheral	Bacteria	Bacteroidetes	Bacteroidia	Chitinophagales	Chitinophagaceae	Dinghuibacter	#N/A
AB924399.1.1500	B790_uncultured Sphingobacteriales bacterium	85	0.000902371	0.0680969	1.66608	#N/A	Peripheral	Bacteria	Nitrospirae	Thermodesulfovibrionia	uncultured	uncultured Sphingobacteriales bacterium	uncultured Sphingobacteriales bacterium	uncultured Sphingobacteriales bacterium
JF115280.1.1366	B476_Arenimonas	85	0.000146798	0.207612	1.0908	#N/A	Peripheral	Bacteria	Proteobacteria	Gammaproteobacteria	Xanthomonadales	Xanthomonadaceae	Arenimonas	Arenimonas daechungensis
KM205532.1.1463	B3444_f_Rhodocyclaceae	85	4.33229e-05	0.0896886	1.212	#N/A	Peripheral	Bacteria	Proteobacteria	Gammaproteobacteria	Betaproteobacteriales	Rhodocyclaceae	#N/A	#N/A
1ddc7e5a583085955479eee6cea066ba	A420_uncultured archaeon	84	0.000841809	0.0464853	1.69587	#N/A	Peripheral	Archaea	Nanoarchaeaeota	Woesearchaeia	uncultured archaeon	uncultured archaeon	uncultured archaeon	uncultured archaeon
U59984.1.947	A249_uncultured euryarchaeote	83	0.00043988	0.0238061	1.66608	#N/A	Peripheral	Archaea	Crenarchaeota	Bathyarchaeia	uncultured euryarchaeote	uncultured euryarchaeote	uncultured euryarchaeote	uncultured euryarchaeote
7b383a781cb59d2b8100b02ccbdaed1a	B4740_f_Syntrophobacteraceae	83	4.2502e-05	0.113224	1.17621	#N/A	Peripheral	Bacteria	Proteobacteria	Deltaproteobacteria	Syntrophobacterales	Syntrophobacteraceae	#N/A	#N/A
AJ617860.1.1476	B1065_Geobacter	83	0.000737458	0.0470315	1.84641	#N/A	Peripheral	Bacteria	Proteobacteria	Deltaproteobacteria	Desulfuromonadales	Geobacteraceae	Geobacter	uncultured Desulfuromonadales bacterium
HM269224.1.1341	B601_f_Nocardioidaceae	83	0.00148663	0.0696763	1.81112	#N/A	Peripheral	Bacteria	Actinobacteria	Actinobacteria	Propionibacteriales	Nocardioidaceae	#N/A	#N/A
HQ118941.1.1519	B179_Haliangium	83	0.00467554	0.113224	1.74054	#N/A	Peripheral	Bacteria	Proteobacteria	Deltaproteobacteria	Myxococcales	Haliangiaceae	Haliangium	#N/A
DQ404598.1.1496	B1690_Candidatus Koribacter	82	4.88654e-05	0.114515	1.09957	#N/A	Peripheral	Bacteria	Acidobacteria	Acidobacteriia	Acidobacteriales	Koribacteraceae	Candidatus Koribacter	#N/A
GQ264118.1.1475	B1746_Haliangium	82	8.83052e-05	0.176086	1.06233	#N/A	Peripheral	Bacteria	Proteobacteria	Deltaproteobacteria	Myxococcales	Haliangiaceae	Haliangium	uncultured prokaryote
JF168212.1.1341	B2879_Jatrophihabitans	82	0.000233748	0.0928019	1.09191	#N/A	Peripheral	Bacteria	Actinobacteria	Actinobacteria	Frankiales	Frankiaceae	Jatrophihabitans	#N/A
KC854846.1.1453	B947_Flavisolibacter	82	6.45873e-05	0.0475907	1.14923	#N/A	Peripheral	Bacteria	Bacteroidetes	Bacteroidia	Chitinophagales	Chitinophagaceae	Flavisolibacter	#N/A
3ea4f318fee69b185b13ace8a8b4e1e5	A206_o_NA	81	0.000849501	0.0938881	1.50563	#N/A	Peripheral	Archaea	Thaumarchaeota	#N/A	#N/A	#N/A	#N/A	#N/A
EU155988.1.1055	A144_Methanobacterium	81	0.00167651	0.137174	1.69927	#N/A	Peripheral	Archaea	Euryarchaeota	Methanobacteria	Methanobacteriales	Methanobacteriaceae	Methanobacterium	#N/A
JX223411.1.1325	B233_Geobacter	81	3.7591e-05	0.0938881	1.09957	#N/A	Peripheral	Bacteria	Proteobacteria	Deltaproteobacteria	Desulfuromonadales	Geobacteraceae	Geobacter	#N/A
78f190275fc4ae5b31c9c5a75bfea972	A376_uncultured archaeon	80	0.00119128	0.04875	2.00247	#N/A	Peripheral	Archaea	Nanoarchaeaeota	Woesearchaeia	uncultured archaeon	uncultured archaeon	uncultured archaeon	uncultured archaeon
AJ518770.1.1242	B43_Pseudolabrys	80	0.00119002	0.095	1.47354	#N/A	Peripheral	Bacteria	Proteobacteria	Alphaproteobacteria	Rhizobiales	Xanthobacteraceae	Pseudolabrys	#N/A
JX222588.1.1237	B1546_Geobacter	80	0.000559191	0.0246875	1.77583	#N/A	Peripheral	Bacteria	Proteobacteria	Deltaproteobacteria	Desulfuromonadales	Geobacteraceae	Geobacter	#N/A
KM200373.1.1452	B2274_Candidatus Solibacter	80	8.81873e-05	0.13875	1.01525	#N/A	Peripheral	Bacteria	Acidobacteria	Acidobacteriia	Solibacterales	Solibacteraceae (Subgroup 3)	Candidatus Solibacter	#N/A
AB364805.1.1423	B507_Bryobacter	79	0.000166355	0.140362	1.03386	#N/A	Peripheral	Bacteria	Acidobacteria	Acidobacteriia	Solibacterales	Solibacteraceae (Subgroup 3)	Bryobacter	#N/A
AB608678.1.1453	B3627_f_Burkholderiaceae	79	9.25427e-05	0.024996	1.56431	#N/A	Peripheral	Bacteria	Proteobacteria	Gammaproteobacteria	Betaproteobacteriales	Burkholderiaceae	#N/A	#N/A
AB630807.1.1448	B3111_Ferruginibacter	78	2.54278e-05	0.0973044	1.01525	#N/A	Peripheral	Bacteria	Bacteroidetes	Bacteroidia	Chitinophagales	Chitinophagaceae	Ferruginibacter	#N/A
EF020033.1.1350	B2682_Candidatus Solibacter	78	0.000506282	0.0499671	1.66997	#N/A	Peripheral	Bacteria	Acidobacteria	Acidobacteriia	Solibacterales	Solibacteraceae (Subgroup 3)	Candidatus Solibacter	#N/A
EF203194.1.1475	B4945_uncultured	78	5.31062e-05	0.204142	0.919972	#N/A	Peripheral	Bacteria	Gemmatimonadetes	Gemmatimonadetes	Gemmatimonadales	Gemmatimonadaceae	uncultured	metagenome
73b4d63ca2d5dabd6a149bfda086be8e	F226_o_NA	78	0.00538827	0.119987	1.84924	#N/A	Peripheral	Fungi	#N/A	#N/A	#N/A	#N/A	#N/A	#N/A
a90b6c824e251a850d126ce933c5401c	F3675_unidentified	78	0.000124129	0.0973044	0.97728	#N/A	Peripheral	Fungi	unidentified	unidentified	unidentified	unidentified	unidentified	unidentified
AB486215.1.1345	B1432_f_Burkholderiaceae	77	0.00511336	0.0984989	1.80764	#N/A	Peripheral	Bacteria	Proteobacteria	Gammaproteobacteria	Betaproteobacteriales	Burkholderiaceae	#N/A	#N/A
692e6307e541aec45558166c27a71b24	B4094_uncultured Caldilineae bacterium	76	0.000267007	0.075831	1.62716	#N/A	Peripheral	Bacteria	Chloroflexi	Anaerolineae	RBG-13-54-9	uncultured Caldilineae bacterium	uncultured Caldilineae bacterium	uncultured Caldilineae bacterium
AB991689.1.1450	B4272_[Aquaspirillum] arcticum group	76	5.04547e-05	0.122922	0.930933	#N/A	Peripheral	Bacteria	Proteobacteria	Gammaproteobacteria	Betaproteobacteriales	Burkholderiaceae	[Aquaspirillum] arcticum group	Actimicrobium sp. MsC-12-4CB4-02
EF111087.1.1301	B633_o_NA	76	0.000812622	0.0259695	1.46565	#N/A	Peripheral	Bacteria	Acidobacteria	Subgroup 17	#N/A	#N/A	#N/A	#N/A
EU132102.1.1326	B1578_uncultured Desulfovirga sp.	76	0.00127764	0.122922	1.49353	#N/A	Peripheral	Bacteria	Acidobacteria	Holophagae	Subgroup 7	uncultured Desulfovirga sp.	uncultured Desulfovirga sp.	uncultured Desulfovirga sp.
EU133552.1.1310	B720_Sphingomonas	76	0.000112347	0.208795	0.86303	#N/A	Peripheral	Bacteria	Proteobacteria	Alphaproteobacteria	Sphingomonadales	Sphingomonadaceae	Sphingomonas	#N/A
FPLL01006448.15.1483	B3688_uncultured	76	2.58871e-05	0.099723	0.959039	#N/A	Peripheral	Bacteria	Proteobacteria	Alphaproteobacteria	Acetobacterales	Acetobacteraceae	uncultured	bacterium enrichment culture clone auto142_4W
HM438231.1.1508	B4665_o_NA	76	3.38244e-05	0.122922	0.930933	#N/A	Peripheral	Bacteria	Acidobacteria	Subgroup 6	#N/A	#N/A	#N/A	#N/A
SH530126.07FU_HG937034_reps	F4_Pseudeurotium	76	0.000343432	0.075831	1.84924	#N/A	Peripheral	Fungi	Ascomycota	Leotiomycetes	Thelebolales	Pseudeurotiaceae	Pseudeurotium	#N/A
MWBV01000002.35883.37325	A264_Candidatus Diapherotrites archaeon ADurb.Bin253	75	1.85491e-05	0.0768	0.959039	#N/A	Peripheral	Archaea	Nanoarchaeaeota	Woesearchaeia	Candidatus Diapherotrites archaeon ADurb.Bin253	Candidatus Diapherotrites archaeon ADurb.Bin253	Candidatus Diapherotrites archaeon ADurb.Bin253	Candidatus Diapherotrites archaeon ADurb.Bin253
388a6b97d3f2abcb41958329d14c8277	B591_o_NA	75	0.0024737	0.0768	1.36698	#N/A	Peripheral	Bacteria	Acidobacteria	Subgroup 6	#N/A	#N/A	#N/A	#N/A
7a8a052bb3c750fbaeda8a5aa997df26	B6058_metagenome	75	0.000112478	0.190578	0.86303	#N/A	Peripheral	Bacteria	Chloroflexi	Anaerolineae	SJA-15	metagenome	metagenome	metagenome
AM936014.1.1363	B3063_Pseudomonas	75	6.01772e-05	0.0519111	0.948622	#N/A	Peripheral	Bacteria	Proteobacteria	Gammaproteobacteria	Pseudomonadales	Pseudomonadaceae	Pseudomonas	#N/A
JN615785.1.1377	B4153_Candidatus Udaeobacter	75	9.2492e-05	0	1.46565	#N/A	Peripheral	Bacteria	Verrucomicrobia	Verrucomicrobiae	Chthoniobacterales	Chthoniobacteraceae	Candidatus Udaeobacter	#N/A
LC124596.1.1491	B734_ADurb.Bin063-1	75	0.000141437	0.2112	0.834559	#N/A	Peripheral	Bacteria	Verrucomicrobia	Verrucomicrobiae	Pedosphaerales	Pedosphaeraceae	ADurb.Bin063-1	#N/A
ec4e017c4c208096fd8315116961eaa7	A758_o_NA	74	0.000357794	0.0266618	1.5641	#N/A	Peripheral	Archaea	Nanoarchaeaeota	Woesearchaeia	#N/A	#N/A	#N/A	#N/A
AB487423.1.1338	B4859_f_Clostridiaceae 1	74	0.000609982	0.077794	1.49353	#N/A	Peripheral	Bacteria	Firmicutes	Clostridia	Clostridiales	Clostridiaceae 1	#N/A	#N/A
AM162448.1.1453	B144_f_Xanthobacteraceae	74	0.000885255	0	1.84661	#N/A	Peripheral	Bacteria	Proteobacteria	Alphaproteobacteria	Rhizobiales	Xanthobacteraceae	#N/A	#N/A
AM935808.1.1334	B3517_Nocardioides	74	1.08432e-05	0.0266618	0.987146	#N/A	Peripheral	Bacteria	Actinobacteria	Actinobacteria	Propionibacteriales	Nocardioidaceae	Nocardioides	#N/A
FJ592549.1.1348	B34_f_Xanthobacteraceae	74	4.68552e-05	0.149014	0.846614	#N/A	Peripheral	Bacteria	Proteobacteria	Alphaproteobacteria	Rhizobiales	Xanthobacteraceae	#N/A	#N/A
HM243802.1.1534	B1801_uncultured Prosthecobacter sp.	74	4.2428e-05	0.126004	0.874721	#N/A	Peripheral	Bacteria	Verrucomicrobia	Verrucomicrobiae	Pedosphaerales	Pedosphaeraceae	uncultured Prosthecobacter sp.	uncultured Prosthecobacter sp.
HQ729791.1.1458	B3981_f_Solibacteraceae (Subgroup 3)	74	4.59507e-05	0.149014	0.846614	#N/A	Peripheral	Bacteria	Acidobacteria	Acidobacteriia	Solibacterales	Solibacteraceae (Subgroup 3)	#N/A	#N/A
8b72b4e8c71e21ccb3c091c85a2ecc4c	A322_o_NA	73	0.000131614	0	1.5641	#N/A	Peripheral	Archaea	Nanoarchaeaeota	Woesearchaeia	#N/A	#N/A	#N/A	#N/A
HQ330720.1.930	A297_uncultured archaeon	73	0.00218917	0.103584	1.6917	#N/A	Peripheral	Archaea	Altiarchaeota	Altiarchaeia	uncultured archaeon	uncultured archaeon	uncultured archaeon	uncultured archaeon
CU466850.1.1349	B1996_f_Burkholderiaceae	73	0.000225932	0.027022	1.34518	#N/A	Peripheral	Bacteria	Proteobacteria	Gammaproteobacteria	Betaproteobacteriales	Burkholderiaceae	#N/A	#N/A
FJ946564.1.1290	B1290_wastewater metagenome	73	3.11431e-05	0.216176	0.777616	#N/A	Peripheral	Bacteria	Chloroflexi	Anaerolineae	SBR1031	A4b	wastewater metagenome	wastewater metagenome
JX222048.1.1445	B217_uncultured	73	0.000517782	0.103584	1.48295	#N/A	Peripheral	Bacteria	Proteobacteria	Alphaproteobacteria	Rhizobiales	Methyloligellaceae	uncultured	#N/A
KU973603.1.1489	B4296_Variovorax	73	0.000604829	0.078814	1.45824	#N/A	Peripheral	Bacteria	Proteobacteria	Gammaproteobacteria	Betaproteobacteriales	Burkholderiaceae	Variovorax	#N/A
KC541074.1.1551	B3085_o_NA	72	0.000115425	0.21875	0.749145	#N/A	Peripheral	Bacteria	Acidobacteria	Subgroup 17	#N/A	#N/A	#N/A	#N/A
KJ590668.1.1533	B1147_f_Pedosphaeraceae	72	0.000113018	0.21875	0.749145	#N/A	Peripheral	Bacteria	Verrucomicrobia	Verrucomicrobiae	Pedosphaerales	Pedosphaeraceae	#N/A	#N/A
dfa5534ae16fca48ae0f233f763e78b3	A651_Candidatus Diapherotrites archaeon ADurb.Bin253	71	8.11299e-05	0	1.33409	#N/A	Peripheral	Archaea	Nanoarchaeaeota	Woesearchaeia	Candidatus Diapherotrites archaeon ADurb.Bin253	Candidatus Diapherotrites archaeon ADurb.Bin253	Candidatus Diapherotrites archaeon ADurb.Bin253	Candidatus Diapherotrites archaeon ADurb.Bin253
EF590018.1.1411	B732_o_Sva0485	71	4.56069e-05	0.154731	0.762296	#N/A	Peripheral	Bacteria	Proteobacteria	Deltaproteobacteria	Sva0485	#N/A	#N/A	#N/A
EU202901.1.1447	B1270_Arenimonas	71	1.99547e-05	0.054751	0.874721	#N/A	Peripheral	Bacteria	Proteobacteria	Gammaproteobacteria	Xanthomonadales	Xanthomonadaceae	Arenimonas	Arenimonas daechungensis
JF139715.1.1339	B5791_o_NA	71	2.12598e-05	0.130926	0.790402	#N/A	Peripheral	Bacteria	Actinobacteria	Actinobacteria	#N/A	#N/A	#N/A	#N/A
JF215191.1.1355	B1606_Methylomonas	71	0.00186834	0.154731	1.33874	#N/A	Peripheral	Bacteria	Proteobacteria	Gammaproteobacteria	Methylococcales	Methylomonaceae	Methylomonas	#N/A
8bd7d31a15878fe7517a494b1933e164	A885_uncultured archaeon	70	5.37072e-05	0.0281633	0.833989	#N/A	Peripheral	Archaea	Nanoarchaeaeota	Woesearchaeia	uncultured archaeon	uncultured archaeon	uncultured archaeon	uncultured archaeon
1b1bd5cadf1a3c0689f6b911c338ddc7	B1984_AKIW659	70	0.00028967	0.0281633	1.26831	#N/A	Peripheral	Bacteria	Acidobacteria	Acidobacteriia	Solibacterales	Solibacteraceae (Subgroup 3)	AKIW659	uncultured soil bacterium
EU135451.1.1397	B312_Candidatus Udaeobacter	70	4.36613e-05	0.0281633	0.833989	#N/A	Peripheral	Bacteria	Verrucomicrobia	Verrucomicrobiae	Chthoniobacterales	Chthoniobacteraceae	Candidatus Udaeobacter	#N/A
AB486572.1.1389	B435_Geobacter	69	0.000187765	1.11022e-16	1.24891	#N/A	Peripheral	Bacteria	Proteobacteria	Deltaproteobacteria	Desulfuromonadales	Geobacteraceae	Geobacter	#N/A
JF266325.1.1360	B5444_Terrimonas	69	0.000170659	0.0831758	0.748015	#N/A	Peripheral	Bacteria	Bacteroidetes	Bacteroidia	Chitinophagales	Chitinophagaceae	Terrimonas	#N/A
1f048afe3154a91323e2a34a4f136883	A494_uncultured crenarchaeote	68	0.000548744	0.0570934	1.31709	#N/A	Peripheral	Archaea	Nanoarchaeaeota	Woesearchaeia	uncultured crenarchaeote	uncultured crenarchaeote	uncultured crenarchaeote	uncultured crenarchaeote
b9d1d1eb9b2358b27345ec12dabc95ae	A491_o_NA	68	2.45312e-05	0.0843426	0.762296	#N/A	Peripheral	Archaea	Nanoarchaeaeota	Woesearchaeia	#N/A	#N/A	#N/A	#N/A
c62ba1acc0fb190f5291428502484c54	A697_uncultured archaeon	68	0.00506602	0.110727	1.49477	#N/A	Peripheral	Archaea	Nanoarchaeaeota	Woesearchaeia	uncultured archaeon	uncultured archaeon	uncultured archaeon	uncultured archaeon
22e9c323315fd5f143e789bd338ba187	B2795_o_SBR1031	68	0.000148218	0.0570934	0.748015	#N/A	Peripheral	Bacteria	Chloroflexi	Anaerolineae	SBR1031	#N/A	#N/A	#N/A
ABSQ01001477.375.1869	B993_o_Gaiellales	68	0.000147774	0.110727	0.690698	#N/A	Peripheral	Bacteria	Actinobacteria	Thermoleophilia	Gaiellales	#N/A	#N/A	#N/A
EF516163.1.1479	B898_Haliangium	68	0.000658579	0.0289792	1.20253	#N/A	Peripheral	Bacteria	Proteobacteria	Deltaproteobacteria	Myxococcales	Haliangiaceae	Haliangium	#N/A
EF516971.1.1477	B674_Subgroup 10	68	7.10323e-05	0.184689	0.692203	#N/A	Peripheral	Bacteria	Acidobacteria	Thermoanaerobaculia	Thermoanaerobaculales	Thermoanaerobaculaceae	Subgroup 10	#N/A
HQ330554.1.1418	B1623_uncultured	68	6.3193e-05	0.0843426	0.719357	#N/A	Peripheral	Bacteria	Proteobacteria	Deltaproteobacteria	Syntrophobacterales	Syntrophaceae	uncultured	uncultured delta proteobacterium
JX949990.1.1406	B5229_f_Burkholderiaceae	68	0.000314752	0.0289792	1.35237	#N/A	Peripheral	Bacteria	Proteobacteria	Gammaproteobacteria	Betaproteobacteriales	Burkholderiaceae	#N/A	#N/A
KF475878.1.1503	B1602_Pseudomonas	68	0.00195316	0.0843426	1.49593	#N/A	Peripheral	Bacteria	Proteobacteria	Gammaproteobacteria	Pseudomonadales	Pseudomonadaceae	Pseudomonas	#N/A
f6bd08cae40de97a90a41f272b5f9027	A412_uncultured archaeon	67	1.88718e-05	0.0855424	0.734189	#N/A	Peripheral	Archaea	Nanoarchaeaeota	Woesearchaeia	uncultured archaeon	uncultured archaeon	uncultured archaeon	uncultured archaeon
1d18b62c2c563fbe725e664c3d8f3ecf	B6236_Anaerolinea	67	0.000601709	0.0855424	1.24651	#N/A	Peripheral	Bacteria	Chloroflexi	Anaerolineae	Anaerolineales	Anaerolineaceae	Anaerolinea	#N/A
3c386b66edf5d12532eb50cfd249103e	B3013_Anaerolinea	67	1.71023e-05	0.0855424	0.734189	#N/A	Peripheral	Bacteria	Chloroflexi	Anaerolineae	Anaerolineales	Anaerolineaceae	Anaerolinea	uncultured bacterium
JF198827.1.1321	B310_Candidatus Koribacter	67	0.00026827	0.0294052	1.31709	#N/A	Peripheral	Bacteria	Acidobacteria	Acidobacteriia	Acidobacteriales	Koribacteraceae	Candidatus Koribacter	#N/A
KJ588870.1.1513	B3110_Mycobacterium	67	3.18608e-05	0	1.20253	#N/A	Peripheral	Bacteria	Actinobacteria	Actinobacteria	Corynebacteriales	Mycobacteriaceae	Mycobacterium	#N/A
KM205524.1.1459	B1360_uncultured soil bacterium	67	0.000108362	0.0855424	0.690698	#N/A	Peripheral	Bacteria	Bacteroidetes	Ignavibacteria	Kryptoniales	BSV26	uncultured soil bacterium	uncultured soil bacterium
7395efddad05bf61e3ac30813c317f34	F4046_unidentified	67	0.000175064	0.112274	0.66204	#N/A	Peripheral	Fungi	unidentified	unidentified	unidentified	unidentified	unidentified	unidentified
b26d43861da671a29cc62da0cc40e83c	F3681_o_NA	67	5.38426e-05	0.210292	0.635261	#N/A	Peripheral	Fungi	#N/A	#N/A	#N/A	#N/A	#N/A	#N/A
b31a7052bc6d06f842f1bcf560736102	F267_o_Chaetothyriales	67	0.000447719	0.0579194	1.53416	#N/A	Peripheral	Fungi	Ascomycota	Eurotiomycetes	Chaetothyriales	#N/A	#N/A	#N/A
2d401861e262b696f723bf0e0c7463f1	B5864_o_NA	66	2.24277e-05	0.235537	0.578319	#N/A	Peripheral	Bacteria	Acidobacteria	Subgroup 6	#N/A	#N/A	#N/A	#N/A
AB488356.1.1380	B419_uncultured Desulfuromonadales bacterium	66	1.75037e-05	0.213039	0.60679	#N/A	Peripheral	Bacteria	Acidobacteria	Holophagae	Subgroup 7	uncultured Desulfuromonadales bacterium	uncultured Desulfuromonadales bacterium	uncultured Desulfuromonadales bacterium
AB672147.1.1461	B1883_Rhodanobacter	66	0.000303406	0.0298439	1.2818	#N/A	Peripheral	Bacteria	Proteobacteria	Gammaproteobacteria	Xanthomonadales	Rhodanobacteraceae	Rhodanobacter	uncultured Dokdonella sp.
JX222568.1.1502	B3151_f_Rhodocyclaceae	66	0.000615743	0.0298439	1.49593	#N/A	Peripheral	Bacteria	Proteobacteria	Gammaproteobacteria	Betaproteobacteriales	Rhodocyclaceae	#N/A	#N/A
KX163389.1.1425	B1484_o_Sva0485	66	0.000490431	0.0587695	1.30269	#N/A	Peripheral	Bacteria	Proteobacteria	Deltaproteobacteria	Sva0485	#N/A	#N/A	#N/A
82b374f3f2a9219d0e9c20a90f521823	A945_uncultured euryarchaeote	65	0.000139846	0.115503	0.604724	#N/A	Peripheral	Archaea	Nanoarchaeaeota	Woesearchaeia	uncultured euryarchaeote	uncultured euryarchaeote	uncultured euryarchaeote	uncultured euryarchaeote
a42569ebce5e08daa8456fd344df839e	A952_uncultured archaeon	65	0.000290849	0.142012	0.576066	#N/A	Peripheral	Archaea	Nanoarchaeaeota	Woesearchaeia	uncultured archaeon	uncultured archaeon	uncultured archaeon	uncultured archaeon
CU918708.1.1283	B3228_Devosia	65	2.14378e-05	0.192189	0.60679	#N/A	Peripheral	Bacteria	Proteobacteria	Alphaproteobacteria	Rhizobiales	Devosiaceae	Devosia	#N/A
GQ263927.1.1479	B2695_Sideroxydans	65	1.68536e-05	0.0880473	0.677977	#N/A	Peripheral	Bacteria	Proteobacteria	Gammaproteobacteria	Betaproteobacteriales	Gallionellaceae	Sideroxydans	Gallionella sp. enrichment culture clone MWE_N26
HQ809702.1.1443	B4349_f_Burkholderiaceae	65	0.000164312	0	1.12055	#N/A	Peripheral	Bacteria	Proteobacteria	Gammaproteobacteria	Betaproteobacteriales	Burkholderiaceae	#N/A	#N/A
JX505325.1.1441	B1280_uncultured Ferrimicrobium sp.	65	2.81148e-05	0	1.13675	#N/A	Peripheral	Bacteria	Actinobacteria	Acidimicrobiia	IMCC26256	uncultured Ferrimicrobium sp.	uncultured Ferrimicrobium sp.	uncultured Ferrimicrobium sp.
KM200757.1.1510	B1733_Haliangium	65	0.00114359	0.0880473	1.37903	#N/A	Peripheral	Bacteria	Proteobacteria	Deltaproteobacteria	Myxococcales	Haliangiaceae	Haliangium	uncultured prokaryote
522504b1d9099056366217a694a7ae9b	F648_Phaeosphaeria	65	0.000459497	0.0302959	1.24651	#N/A	Peripheral	Fungi	Ascomycota	Dothideomycetes	Pleosporales	Phaeosphaeriaceae	Phaeosphaeria	Phaeosphaeria_podocarpi
5484c0a743e34d1aa0fcc32b7bc28c53	A565_o_NA	64	0.000127924	0.0605469	1.416	#N/A	Peripheral	Archaea	Nanoarchaeaeota	Woesearchaeia	#N/A	#N/A	#N/A	#N/A
FM213069.1.1514	B264_Thiobacillus	64	4.12984e-05	0	1.45696	#N/A	Peripheral	Bacteria	Proteobacteria	Gammaproteobacteria	Betaproteobacteriales	Hydrogenophilaceae	Thiobacillus	#N/A
JQ426533.1.1497	B663_Arenimonas	64	0.000133505	0.0605469	1.17593	#N/A	Peripheral	Bacteria	Proteobacteria	Gammaproteobacteria	Xanthomonadales	Xanthomonadaceae	Arenimonas	#N/A
AF523968.1.1339	B178_Geobacter	63	0.000768785	0.0907029	1.33723	#N/A	Peripheral	Bacteria	Proteobacteria	Deltaproteobacteria	Desulfuromonadales	Geobacteraceae	Geobacter	uncultured Desulfuromonadales bacterium
EU134478.1.1340	B540_Geobacter	63	2.83851e-05	0	1.418	#N/A	Peripheral	Bacteria	Proteobacteria	Deltaproteobacteria	Desulfuromonadales	Geobacteraceae	Geobacter	#N/A
HM062166.1.1419	B1618_Candidatus Solibacter	63	0.000130554	0.0312421	1.23058	#N/A	Peripheral	Bacteria	Acidobacteria	Acidobacteriia	Solibacterales	Solibacteraceae (Subgroup 3)	Candidatus Solibacter	uncultured organism
EU266843.1.1528	B914_uncultured Syntrophaceae bacterium	62	3.60218e-05	0.120708	0.565552	#N/A	Peripheral	Bacteria	Proteobacteria	Deltaproteobacteria	MBNT15	uncultured Syntrophaceae bacterium	uncultured Syntrophaceae bacterium	uncultured Syntrophaceae bacterium
fbe0df96b326dc95c845674830181596	B4770_f_Pedosphaeraceae	62	0.000290236	0.0317378	1.34007	#N/A	Peripheral	Bacteria	Verrucomicrobia	Verrucomicrobiae	Pedosphaerales	Pedosphaeraceae	#N/A	#N/A
HE974771.1.1516	B482_Subgroup 10	62	0.000590922	0.0920916	1.12242	#N/A	Peripheral	Bacteria	Acidobacteria	Thermoanaerobaculia	Thermoanaerobaculales	Thermoanaerobaculaceae	Subgroup 10	bacterium enrichment culture clone Anammox_2
SH201184.07FU_HG936931_reps	F53_Schizothecium	62	5.78961e-05	0.174818	0.549848	#N/A	Peripheral	Fungi	Ascomycota	Sordariomycetes	Sordariales	Lasiosphaeriaceae	Schizothecium	#N/A
6eb8c79358a6ef34260e9843bd0ff7d3	A689_uncultured bacterium	61	1.64833e-05	0.0935232	0.565552	#N/A	Peripheral	Archaea	Nanoarchaeaeota	Woesearchaeia	uncultured bacterium	uncultured bacterium	uncultured bacterium	uncultured bacterium
JN409157.1.1478	B2601_uncultured Verrucomicrobia bacterium	61	4.69378e-05	0.0322494	1.33723	#N/A	Peripheral	Bacteria	Verrucomicrobia	Verrucomicrobiae	Pedosphaerales	Pedosphaeraceae	uncultured Verrucomicrobia bacterium	uncultured Verrucomicrobia bacterium
da0f1025fe8a1ecfa36a0980794bce54	B5045_f_Pedosphaeraceae	60	0.000605718	0.0327778	1.26214	#N/A	Peripheral	Bacteria	Verrucomicrobia	Verrucomicrobiae	Pedosphaerales	Pedosphaeraceae	#N/A	#N/A
EF590004.1.1383	B1008_Ellin6067	60	0.000788941	0.0327778	1.07007	#N/A	Peripheral	Bacteria	Proteobacteria	Gammaproteobacteria	Betaproteobacteriales	Nitrosomonadaceae	Ellin6067	uncultured prokaryote
HM243878.1.1456	B2545_uncultured bacterium	60	5.6409e-06	0.0644444	0.565552	#N/A	Peripheral	Bacteria	Chloroflexi	Anaerolineae	RBG-13-54-9	uncultured bacterium	uncultured bacterium	uncultured bacterium
JN038948.1.1516	B374_uncultured proteobacterium	60	0.000276507	0.0327778	1.12242	#N/A	Peripheral	Bacteria	Nitrospirae	4-29-1	uncultured proteobacterium	uncultured proteobacterium	uncultured proteobacterium	uncultured proteobacterium
KC331222.1.1485	B852_Cryobacterium	60	4.5902e-05	0	0.972306	#N/A	Peripheral	Bacteria	Actinobacteria	Actinobacteria	Micrococcales	Microbacteriaceae	Cryobacterium	#N/A
KY190461.1.1494	B5478_f_Pedosphaeraceae	60	9.16385e-06	0.206111	0.464435	#N/A	Peripheral	Bacteria	Verrucomicrobia	Verrucomicrobiae	Pedosphaerales	Pedosphaeraceae	#N/A	#N/A
9e3f55b992165b5ffd4a23dc793b589f	F127_Oberwinklerozyma	60	0.01245	0.399444	2.19715	#N/A	Peripheral	Fungi	Basidiomycota	Microbotryomycetes	Microbotryomycetes_ord_Incertae_sedis	Chrysozymaceae	Oberwinklerozyma	Oberwinklerozyma_silvestris
SH529770.07FU_JX337833_reps	F12_Pseudeurotium	60	0.0118258	0.430556	2.11315	#N/A	Peripheral	Fungi	Ascomycota	Leotiomycetes	Thelebolales	Pseudeurotiaceae	Pseudeurotium	unidentified
8a14aeb1756cece8b129544c65671b51	B5411_uncultured Gemmatimonadetes bacterium	59	8.81025e-06	0.0654984	0.537446	#N/A	Peripheral	Bacteria	Chloroflexi	Anaerolineae	SBR1031	uncultured Gemmatimonadetes bacterium	uncultured Gemmatimonadetes bacterium	uncultured Gemmatimonadetes bacterium
AJ582031.1.1400	B176_Phenylobacterium	59	0.000261214	0.0333238	1.03478	#N/A	Peripheral	Bacteria	Proteobacteria	Alphaproteobacteria	Caulobacterales	Caulobacteraceae	Phenylobacterium	Phenylobacterium sp.
EU134366.1.1376	B908_f_Archangiaceae	59	1.47586e-05	0	0.928015	#N/A	Peripheral	Bacteria	Proteobacteria	Deltaproteobacteria	Myxococcales	Archangiaceae	#N/A	#N/A
JN038630.1.1512	B915_Geobacter	59	2.35082e-05	0.0333238	0.518749	#N/A	Peripheral	Bacteria	Proteobacteria	Deltaproteobacteria	Desulfuromonadales	Geobacteraceae	Geobacter	#N/A
d13b1a46d3abe0113212f64cf1076193	F728_unidentified	59	0.00035015	0.066073	1.21908	#N/A	Peripheral	Fungi	Ascomycota	Sordariomycetes	Sordariales	unidentified	unidentified	unidentified
JQ750560.1.904	A467_uncultured archaeon Arc.171	58	0.000482861	0.0665874	1.17969	#N/A	Peripheral	Archaea	Crenarchaeota	Bathyarchaeia	uncultured archaeon Arc.171	uncultured archaeon Arc.171	uncultured archaeon Arc.171	uncultured archaeon Arc.171
2a2bc31d24beb9b4f37d9558ff2dd251	B5337_o_Acidobacteriales	58	0.000106203	0.0338882	0.490091	#N/A	Peripheral	Bacteria	Acidobacteria	Acidobacteriia	Acidobacteriales	#N/A	#N/A	#N/A
2e5c6daacd7d28ade75d897be836bcec	B713_uncultured eubacterium WCHB1-50	58	6.92028e-06	0.0665874	0.50934	#N/A	Peripheral	Bacteria	Chloroflexi	Anaerolineae	RBG-13-54-9	uncultured eubacterium WCHB1-50	uncultured eubacterium WCHB1-50	uncultured eubacterium WCHB1-50
FJ538138.1.1521	B619_o_NA	58	0.000562036	0.0665874	1.14525	#N/A	Peripheral	Bacteria	Acidobacteria	Subgroup 6	#N/A	#N/A	#N/A	#N/A
FJ936894.1.1517	B2802_uncultured	58	0.000141738	1.11022e-16	1.08637	#N/A	Peripheral	Bacteria	Proteobacteria	Deltaproteobacteria	Desulfarculales	Desulfarculaceae	uncultured	uncultured sludge bacterium H16
GQ007850.1.1372	B1549_o_Myxococcales	58	0.00168305	0.0665874	1.14525	#N/A	Peripheral	Bacteria	Proteobacteria	Deltaproteobacteria	Myxococcales	#N/A	#N/A	#N/A
HM312380.1.1315	B983_Anaerolinea	58	1.60828e-05	1.11022e-16	0.906527	#N/A	Peripheral	Bacteria	Chloroflexi	Anaerolineae	Anaerolineales	Anaerolineaceae	Anaerolinea	uncultured bacterium
KC286792.1.1497	B1709_Ferruginibacter	58	0.000200638	0.0665874	0.964207	#N/A	Peripheral	Bacteria	Bacteroidetes	Bacteroidia	Chitinophagales	Chitinophagaceae	Ferruginibacter	#N/A
db816de668fdd2a92c5b54a4a68065e7	F4457_Setophoma	58	4.84812e-05	0.0665874	0.461433	#N/A	Peripheral	Fungi	Ascomycota	Dothideomycetes	Pleosporales	Phaeosphaeriaceae	Setophoma	Setophoma_vernoniae
4b978797da68d9c0577279487b328cc8	A553_uncultured archaeon	57	6.21512e-05	0.0344721	0.461433	#N/A	Peripheral	Archaea	Nanoarchaeaeota	Woesearchaeia	uncultured archaeon	uncultured archaeon	uncultured archaeon	uncultured archaeon
f071fb989161e752d5743c28e32bcba8	A535_o_NA	57	1.26454e-05	0.215451	0.379021	#N/A	Peripheral	Archaea	Nanoarchaeaeota	Woesearchaeia	#N/A	#N/A	#N/A	#N/A
83dbfd16f930d3893415341ee35be610	B4922_f_Pedosphaeraceae	57	4.32422e-05	0.0344721	0.840748	#N/A	Peripheral	Bacteria	Verrucomicrobia	Verrucomicrobiae	Pedosphaerales	Pedosphaeraceae	#N/A	#N/A
DQ640673.1.1400	B847_Ferruginibacter	57	7.53553e-05	0.0344721	1.01426	#N/A	Peripheral	Bacteria	Bacteroidetes	Bacteroidia	Chitinophagales	Chitinophagaceae	Ferruginibacter	#N/A
ffd400e7ace7f151a7fe56d4d5452a38	B3930_uncultured organism	57	4.12539e-05	0.0677131	0.432775	#N/A	Peripheral	Bacteria	Actinobacteria	Acidimicrobiia	IMCC26256	uncultured organism	uncultured organism	uncultured organism
JN023364.1.1435	B360_Phenylobacterium	57	2.10358e-05	0	0.873638	#N/A	Peripheral	Bacteria	Proteobacteria	Alphaproteobacteria	Caulobacterales	Caulobacteraceae	Phenylobacterium	uncultured soil bacterium
KC331573.1.1530	B623_uncultured Prosthecobacter sp.	57	0.00124665	0.0344721	1.14525	#N/A	Peripheral	Bacteria	Verrucomicrobia	Verrucomicrobiae	Pedosphaerales	Pedosphaeraceae	uncultured Prosthecobacter sp.	uncultured Prosthecobacter sp.
KY190514.1.1422	B1291_o_S085	57	9.43167e-06	0.188366	0.407492	#N/A	Peripheral	Bacteria	Chloroflexi	Dehalococcoidia	S085	#N/A	#N/A	#N/A
dfc4fbf4aa9f06d039c90b1966b57ea8	F330_unidentified	57	0.015784	0.516467	0.76908	#N/A	Peripheral	Fungi	unidentified	unidentified	unidentified	unidentified	unidentified	unidentified
6096c2ca89a452b82397006a0f7b8a08	A620_uncultured euryarchaeote	56	0.00116181	0.0688776	0.893631	#N/A	Peripheral	Archaea	Nanoarchaeaeota	Woesearchaeia	uncultured euryarchaeote	uncultured euryarchaeote	uncultured euryarchaeote	uncultured euryarchaeote
4c38e494f8c3dce114f2fcd1339a0373	B4339_Pedosphaera	56	0.000306809	0.0688776	0.767567	#N/A	Peripheral	Bacteria	Verrucomicrobia	Verrucomicrobiae	Pedosphaerales	Pedosphaeraceae	Pedosphaera	Pedosphaera parvula Ellin514
AY289483.1.1250	B513_Gemmatimonas	56	0.000788718	0.0688776	0.942154	#N/A	Peripheral	Bacteria	Gemmatimonadetes	Gemmatimonadetes	Gemmatimonadales	Gemmatimonadaceae	Gemmatimonas	#N/A
KF712883.1.1490	B1902_uncultured bacterium	56	2.24079e-05	1.11022e-16	0.461433	#N/A	Peripheral	Bacteria	Armatimonadetes	Chthonomonadetes	Chthonomonadales	uncultured bacterium	uncultured bacterium	uncultured bacterium
KR110071.1.1495	B5448_f_Burkholderiaceae	56	0.000246069	0.0350765	0.978207	#N/A	Peripheral	Bacteria	Proteobacteria	Gammaproteobacteria	Betaproteobacteriales	Burkholderiaceae	#N/A	#N/A
KY992635.1.1565	B2550_Pedosphaera	56	2.2976e-05	0.0350765	0.432775	#N/A	Peripheral	Bacteria	Verrucomicrobia	Verrucomicrobiae	Pedosphaerales	Pedosphaeraceae	Pedosphaera	uncultured bacterium
5766b735a68ba693006e7dca9476b1af	F2876_unidentified	56	0.000106824	0.0350765	0.432775	#N/A	Peripheral	Fungi	unidentified	unidentified	unidentified	unidentified	unidentified	unidentified
d2c6cacb3e4fc8a9329f44d07ee55838	F977_o_NA	56	1.73834e-05	1.11022e-16	0.840748	#N/A	Peripheral	Fungi	#N/A	#N/A	#N/A	#N/A	#N/A	#N/A
dbe1a241de0283150852734cea986478	F1526_o_NA	56	0.000165472	0.0688776	0.893631	#N/A	Peripheral	Fungi	#N/A	#N/A	#N/A	#N/A	#N/A	#N/A
06506a0d597561d309244dbcf4bdb87d	B4244_o_NA	55	0.000129308	0.0357025	0.767567	#N/A	Peripheral	Bacteria	Acidobacteria	Subgroup 18	#N/A	#N/A	#N/A	#N/A
AB672138.1.1458	B2137_o_NA	55	3.63531e-06	0.0700826	0.425021	#N/A	Peripheral	Bacteria	Acidobacteria	Subgroup 18	#N/A	#N/A	#N/A	#N/A
AY960779.1.1357	B1333_bacterium Ellin516	55	6.07844e-06	0.19438	0.35055	#N/A	Peripheral	Bacteria	Verrucomicrobia	Verrucomicrobiae	Pedosphaerales	Pedosphaeraceae	bacterium Ellin516	bacterium Ellin516
EF018578.1.1298	B3851_f_Caulobacteraceae	55	0.000198473	0.0700826	1.06153	#N/A	Peripheral	Bacteria	Proteobacteria	Alphaproteobacteria	Caulobacterales	Caulobacteraceae	#N/A	#N/A
JN038869.1.1519	B7531_uncultured prokaryote	55	3.62553e-06	0.0700826	0.425021	#N/A	Peripheral	Bacteria	Nitrospinae	P9X2b3D02	uncultured prokaryote	uncultured prokaryote	uncultured prokaryote	uncultured prokaryote
4042b62895a3604c93f418dd9c7d4a88	A256_uncultured euryarchaeote	54	0.000427024	0.0363512	0.74208	#N/A	Peripheral	Archaea	Nanoarchaeaeota	Woesearchaeia	uncultured euryarchaeote	uncultured euryarchaeote	uncultured euryarchaeote	uncultured euryarchaeote
DQ017940.1.1505	B559_o_NA	54	0.000121609	0.0713306	1.02215	#N/A	Peripheral	Bacteria	Acidobacteria	Subgroup 17	#N/A	#N/A	#N/A	#N/A
GQ113817.1.1359	B995_Ferruginibacter	54	0.00189984	0.104938	0.950423	#N/A	Peripheral	Bacteria	Bacteroidetes	Bacteroidia	Chitinophagales	Chitinophagaceae	Ferruginibacter	#N/A
JN672477.1.1315	B768_uncultured proteobacterium	54	4.31195e-06	0.0713306	0.396915	#N/A	Peripheral	Bacteria	Proteobacteria	Deltaproteobacteria	MBNT15	uncultured proteobacterium	uncultured proteobacterium	uncultured proteobacterium
KF956765.1.1423	B699_AKIW659	54	6.75245e-05	0.0363512	0.906101	#N/A	Peripheral	Bacteria	Acidobacteria	Acidobacteriia	Solibacterales	Solibacteraceae (Subgroup 3)	AKIW659	uncultured Solibacteraceae bacterium
42cbef631c6e3545aa9f3d12d32fa0c0	A444_uncultured archaeon	53	0.000361367	0.0370239	0.989387	#N/A	Peripheral	Archaea	Nanoarchaeaeota	Woesearchaeia	uncultured archaeon	uncultured archaeon	uncultured archaeon	uncultured archaeon
AY756145.1.1520	B7019_f_Ruminococcaceae	53	1.81682e-06	0.139551	0.35055	#N/A	Peripheral	Bacteria	Firmicutes	Clostridia	Clostridiales	Ruminococcaceae	#N/A	#N/A
CU925479.1.1369	B969_f_uncultured	53	2.13941e-05	0	0.375458	#N/A	Peripheral	Bacteria	Actinobacteria	Thermoleophilia	Gaiellales	uncultured	#N/A	#N/A
EF600576.1.1418	B2123_Candidatus Udaeobacter	53	0.000213094	0.0370239	0.870048	#N/A	Peripheral	Bacteria	Verrucomicrobia	Verrucomicrobiae	Chthoniobacterales	Chthoniobacteraceae	Candidatus Udaeobacter	#N/A
EU132294.1.1358	B609_uncultured candidate division OS-K bacterium	53	6.6556e-05	0.0726237	0.833995	#N/A	Peripheral	Bacteria	Acidobacteria	Holophagae	Subgroup 7	uncultured candidate division OS-K bacterium	uncultured candidate division OS-K bacterium	uncultured candidate division OS-K bacterium
GQ402552.1.1491	B80_ADurb.Bin063-1	53	1.96869e-05	0	0.74208	#N/A	Peripheral	Bacteria	Verrucomicrobia	Verrucomicrobiae	Pedosphaerales	Pedosphaeraceae	ADurb.Bin063-1	#N/A
GU208439.1.1421	B247_Arenimonas	53	0.0115977	0.312567	2.11315	#N/A	Peripheral	Bacteria	Proteobacteria	Gammaproteobacteria	Xanthomonadales	Xanthomonadaceae	Arenimonas	uncultured prokaryote
JQ825069.1.1511	B5312_o_NA	53	6.69619e-05	0.0726237	0.982763	#N/A	Peripheral	Bacteria	Acidobacteria	Subgroup 6	#N/A	#N/A	#N/A	#N/A
KC554691.1.1557	B2118_f_Kineosporiaceae	53	0.00192101	0.49555	0.517067	#N/A	Peripheral	Bacteria	Actinobacteria	Actinobacteria	Kineosporiales	Kineosporiaceae	#N/A	#N/A
AB364795.1.1423	B104_f_uncultured	52	0.000396494	0.0377219	0.676302	#N/A	Peripheral	Bacteria	Acidobacteria	Acidobacteriia	Acidobacteriales	uncultured	#N/A	#N/A
d1665104979d0fe65446e2a7694e1151	B1220_o_Subgroup 7	52	6.746e-05	0.0377219	0.787767	#N/A	Peripheral	Bacteria	Acidobacteria	Holophagae	Subgroup 7	#N/A	#N/A	#N/A
dd176a78a5f7fca45344f0b4d2b5175c	B5156_uncultured Archangiaceae bacterium	52	5.03568e-06	0.0739645	0.340702	#N/A	Peripheral	Bacteria	Proteobacteria	Deltaproteobacteria	Myxococcales	uncultured	uncultured Archangiaceae bacterium	uncultured Archangiaceae bacterium
HE653845.1.1447	B6045_o_NA	52	0.000363244	0.0377219	0.950423	#N/A	Peripheral	Bacteria	Acidobacteria	Subgroup 6	#N/A	#N/A	#N/A	#N/A
HE804536.1.1436	B823_o_OPB41	52	4.04382e-05	0	0.870048	#N/A	Peripheral	Bacteria	Actinobacteria	Coriobacteriia	OPB41	#N/A	#N/A	#N/A
HM445482.1.1379	B515_o_Subgroup 7	52	9.73575e-06	0.108728	0.312596	#N/A	Peripheral	Bacteria	Acidobacteria	Holophagae	Subgroup 7	#N/A	#N/A	#N/A
JF119689.1.1303	B381_Hyphomicrobium	52	2.30388e-05	0	0.3468	#N/A	Peripheral	Bacteria	Proteobacteria	Alphaproteobacteria	Rhizobiales	Hyphomicrobiaceae	Hyphomicrobium	#N/A
JF181350.1.1366	B874_f_uncultured	52	0.00343848	0.49926	0.601071	#N/A	Peripheral	Bacteria	Actinobacteria	Thermoleophilia	Gaiellales	uncultured	#N/A	#N/A
JX222346.1.1490	B7396_Noviherbaspirillum	52	7.14663e-06	0.232988	0.236666	#N/A	Peripheral	Bacteria	Proteobacteria	Gammaproteobacteria	Betaproteobacteriales	Burkholderiaceae	Noviherbaspirillum	#N/A
FJ174739.1.913	A373_o_Marine Group II	51	6.98431e-06	0.207612	0.236666	#N/A	Peripheral	Archaea	Euryarchaeota	Thermoplasmata	Marine Group II	#N/A	#N/A	#N/A
FPLM01005453.4.1463	A44_Methanosaeta	51	0.0221904	0.379854	1.69313	#N/A	Peripheral	Archaea	Euryarchaeota	Methanomicrobia	Methanosarcinales	Methanosaetaceae	Methanosaeta	#N/A
KJ566435.1.986	A475_uncultured euryarchaeote	51	5.02376e-05	0.0384468	0.943377	#N/A	Peripheral	Archaea	Nanoarchaeaeota	Woesearchaeia	uncultured euryarchaeote	uncultured euryarchaeote	uncultured euryarchaeote	uncultured euryarchaeote
JF124601.1.1321	B73_o_NA	51	7.4456e-06	0	0.676302	#N/A	Peripheral	Bacteria	Chloroflexi	KD4-96	#N/A	#N/A	#N/A	#N/A
JX504941.1.1442	B1502_uncultured Catenulispora sp.	51	7.20831e-06	0	0.318142	#N/A	Peripheral	Bacteria	Actinobacteria	MB-A2-108	uncultured Catenulispora sp.	uncultured Catenulispora sp.	uncultured Catenulispora sp.	uncultured Catenulispora sp.
LC020492.1.1491	B546_Clostridium sensu stricto 1	51	3.41105e-05	0	0.833995	#N/A	Peripheral	Bacteria	Firmicutes	Clostridia	Clostridiales	Clostridiaceae 1	Clostridium sensu stricto 1	#N/A
d877085f9c279e22182e3b9dee616796	F2136_o_NA	51	8.71883e-05	0.0753556	0.607118	#N/A	Peripheral	Fungi	#N/A	#N/A	#N/A	#N/A	#N/A	#N/A
AF493651.1.1271	B1377_Flavobacterium	50	8.22022e-06	0	0.639208	#N/A	Peripheral	Bacteria	Bacteroidetes	Bacteroidia	Flavobacteriales	Flavobacteriaceae	Flavobacterium	#N/A
d8b09f47545838686bc284286ec9bab2	B4637_uncultured Acidobacterium sp.	50	3.31902e-06	0.0768	0.28449	#N/A	Peripheral	Bacteria	Latescibacteria	uncultured Acidobacterium sp.	uncultured Acidobacterium sp.	uncultured Acidobacterium sp.	uncultured Acidobacterium sp.	uncultured Acidobacterium sp.
EU834800.1.1445	B7107_OLB12	50	2.73116e-06	0.0768	0.28449	#N/A	Peripheral	Bacteria	Bacteroidetes	Bacteroidia	Cytophagales	Microscillaceae	OLB12	uncultured bacterium
f5ba9ab424bf437c8231fedea6e8076c	B3698_wastewater metagenome	50	4.94426e-05	0	0.752479	#N/A	Peripheral	Bacteria	Chloroflexi	Anaerolineae	SBR1031	A4b	wastewater metagenome	wastewater metagenome
GQ246329.1.1523	B1145_uncultured bacterium	50	0.0146448	0.3392	1.86114	#N/A	Peripheral	Bacteria	Nitrospirae	Thermodesulfovibrionia	uncultured	uncultured bacterium	uncultured bacterium	uncultured bacterium
JF116271.1.1353	B6068_uncultured	50	0.000306365	0.0392	0.872494	#N/A	Peripheral	Bacteria	Proteobacteria	Gammaproteobacteria	Betaproteobacteriales	Burkholderiaceae	uncultured	Burkholderiales bacterium X4
LN567832.1.1371	B1410_MND1	50	8.92805e-05	0	0.911458	#N/A	Peripheral	Bacteria	Proteobacteria	Gammaproteobacteria	Betaproteobacteriales	Nitrosomonadaceae	MND1	#N/A
b17bd51d356d28eabc2fc05dff7968c3	A845_uncultured euryarchaeote	49	1.53686e-05	0.0399833	0.864606	#N/A	Peripheral	Archaea	Nanoarchaeaeota	Woesearchaeia	uncultured euryarchaeote	uncultured euryarchaeote	uncultured euryarchaeote	uncultured euryarchaeote
2e1a7159e049effc93ca553350a3893a	B5593_Terrimonas	49	0.000150187	0.0399833	0.833529	#N/A	Peripheral	Bacteria	Bacteroidetes	Bacteroidia	Chitinophagales	Chitinophagaceae	Terrimonas	#N/A
EU801228.1.1454	B864_Pseudolabrys	49	2.12622e-05	0.0783007	0.203509	#N/A	Peripheral	Bacteria	Proteobacteria	Alphaproteobacteria	Rhizobiales	Xanthobacteraceae	Pseudolabrys	#N/A
JN545848.1.1275	B5694_Micromonospora	49	5.48833e-05	0	0.717191	#N/A	Peripheral	Bacteria	Actinobacteria	Actinobacteria	Micromonosporales	Micromonosporaceae	Micromonospora	#N/A
JQ919768.1.1336	B1241_Paludibaculum	49	0.000421047	0.114952	0.785835	#N/A	Peripheral	Bacteria	Acidobacteria	Acidobacteriia	Solibacterales	Solibacteraceae (Subgroup 3)	Paludibaculum	uncultured Acidobacteria bacterium
1a895e674205dffe280f6db509616aab	F872_o_NA	49	0.000134073	0.0399833	0.833529	#N/A	Peripheral	Fungi	#N/A	#N/A	#N/A	#N/A	#N/A	#N/A
SH182920.07FU_KC507202_reps	F255_Phaeosphaeria	49	0.021934	0.408163	1.52512	#N/A	Peripheral	Fungi	Ascomycota	Dothideomycetes	Pleosporales	Phaeosphaeriaceae	Phaeosphaeria	Phaeosphaeria_podocarpi
SH643074.07FU_KX515071_reps	F347_Filobasidium	49	0.00158501	0.348188	-0.57499	#N/A	Peripheral	Fungi	Basidiomycota	Tremellomycetes	Filobasidiales	Filobasidiaceae	Filobasidium	Filobasidium_magnum
de255c166a278b7ad9e80fb0af27ae47	A631_uncultured archaeon	48	3.68109e-05	0.249132	0.122782	#N/A	Peripheral	Archaea	Euryarchaeota	Thermoplasmata	uncultured	uncultured archaeon	uncultured archaeon	uncultured archaeon
JX426804.1.952	A485_uncultured archaeon	48	0.000104865	0	0.575029	#N/A	Peripheral	Archaea	Nanoarchaeaeota	Woesearchaeia	uncultured archaeon	uncultured archaeon	uncultured archaeon	uncultured archaeon
GQ379479.1.1204	B2265_Stenotrophomonas	48	3.11195e-05	0.0407986	0.203509	#N/A	Peripheral	Bacteria	Proteobacteria	Gammaproteobacteria	Xanthomonadales	Xanthomonadaceae	Stenotrophomonas	Stenotrophomonas rhizophila
HQ119996.1.1502	B814_Flavisolibacter	48	7.07632e-06	0.21875	0.151253	#N/A	Peripheral	Bacteria	Bacteroidetes	Bacteroidia	Chitinophagales	Chitinophagaceae	Flavisolibacter	unidentified
JX505064.1.1431	B1923_uncultured Anaerolineaceae bacterium	48	4.98952e-06	0.21875	0.151253	#N/A	Peripheral	Bacteria	Chloroflexi	Anaerolineae	RBG-13-54-9	uncultured Anaerolineaceae bacterium	uncultured Anaerolineaceae bacterium	uncultured Anaerolineaceae bacterium
KJ875466.1.1488	B6258_Lysinibacillus	48	6.18768e-05	0	0.681903	#N/A	Peripheral	Bacteria	Firmicutes	Bacilli	Bacillales	Planococcaceae	Lysinibacillus	#N/A
LC124581.1.1479	B1239_Syntrophus	48	5.21394e-06	0.117188	0.200171	#N/A	Peripheral	Bacteria	Proteobacteria	Deltaproteobacteria	Syntrophobacterales	Syntrophaceae	Syntrophus	uncultured Syntrophaceae bacterium
56c2ec584e2ac342cec102f62aa7420b	B7816_uncultured Archangiaceae bacterium	47	5.89972e-05	0	0.689782	#N/A	Peripheral	Bacteria	Proteobacteria	Deltaproteobacteria	Myxococcales	uncultured	uncultured Archangiaceae bacterium	uncultured Archangiaceae bacterium
6a3047607d26ad8ccc72c31f8a43e989	B2451_f_Pedosphaeraceae	47	1.89992e-05	0.0814848	0.146193	#N/A	Peripheral	Bacteria	Verrucomicrobia	Verrucomicrobiae	Pedosphaerales	Pedosphaeraceae	#N/A	#N/A
cb157a7bc9ad2da3e76299390cd9ecf9	B6271_Nostoc PCC-7107	47	1.84496e-05	0	0.544744	#N/A	Peripheral	Bacteria	Cyanobacteria	Oxyphotobacteria	Nostocales	Nostocaceae	Nostoc PCC-7107	#N/A
FJ484515.1.1383	B1288_uncultured	47	1.90006e-05	0	0.646615	#N/A	Peripheral	Bacteria	Proteobacteria	Deltaproteobacteria	Syntrophobacterales	Syntrophaceae	uncultured	uncultured delta proteobacterium
FJ484733.1.1353	B2380_Sh765B-TzT-35	47	1.72159e-05	0.0416478	0.174851	#N/A	Peripheral	Bacteria	Rokubacteria	NC10	Methylomirabilales	Methylomirabilaceae	Sh765B-TzT-35	uncultured bacterium
FJ897522.1.1398	B302_Phycicoccus	47	0.00492181	0.0814848	2.28116	#N/A	Peripheral	Bacteria	Actinobacteria	Actinobacteria	Micrococcales	Intrasporangiaceae	Phycicoccus	#N/A
JN038768.1.1514	B6868_f_Pedosphaeraceae	47	4.77459e-05	0.0416478	0.653729	#N/A	Peripheral	Bacteria	Verrucomicrobia	Verrucomicrobiae	Pedosphaerales	Pedosphaeraceae	#N/A	#N/A
JN590703.1.1281	B325_Phenylobacterium	47	0.000135522	0.0416478	0.7556	#N/A	Peripheral	Bacteria	Proteobacteria	Alphaproteobacteria	Caulobacterales	Caulobacteraceae	Phenylobacterium	#N/A
41688e4fa9483342840eded3cdf91725	A384_uncultured archaeon	46	2.22664e-05	0	0.511855	#N/A	Peripheral	Archaea	Nanoarchaeaeota	Woesearchaeia	uncultured archaeon	uncultured archaeon	uncultured archaeon	uncultured archaeon
c7dbbf61e2289231f0a947be614cec37	A852_o_NA	46	0.000319236	0.0831758	0.707064	#N/A	Peripheral	Archaea	Nanoarchaeaeota	Woesearchaeia	#N/A	#N/A	#N/A	#N/A
6dbd234ba513c3405ada2d9bdcd6bc27	B6082_f_Clostridiaceae 1	46	0.000169598	0.0831758	0.44667	#N/A	Peripheral	Bacteria	Firmicutes	Clostridia	Clostridiales	Clostridiaceae 1	#N/A	#N/A
AB486472.1.1327	B2433_f_Clostridiaceae 1	46	2.23983e-05	0	0.511855	#N/A	Peripheral	Bacteria	Firmicutes	Clostridia	Clostridiales	Clostridiaceae 1	#N/A	#N/A
AF432642.1.1424	B5183_uncultured	46	0.000982946	0.0425331	0.716636	#N/A	Peripheral	Bacteria	Gemmatimonadetes	Gemmatimonadetes	Gemmatimonadales	Gemmatimonadaceae	uncultured	#N/A
AF523966.1.1290	B1532_Syntrophus	46	1.87541e-05	0.226843	0.0943105	#N/A	Peripheral	Bacteria	Proteobacteria	Deltaproteobacteria	Syntrophobacterales	Syntrophaceae	Syntrophus	#N/A
AY234519.1.1447	B802_ADurb.Bin063-1	46	1.50551e-05	0	0.511855	#N/A	Peripheral	Bacteria	Verrucomicrobia	Verrucomicrobiae	Pedosphaerales	Pedosphaeraceae	ADurb.Bin063-1	#N/A
dc954ddf403dbcc948bef525070dd625	B4376_uncultured bacterium	46	1.67837e-05	0	0.653729	#N/A	Peripheral	Bacteria	Acidobacteria	Acidobacteriia	Subgroup 13	uncultured bacterium	uncultured bacterium	uncultured bacterium
HE804434.1.1432	B5932_f_Ruminococcaceae	46	0.000107706	0.0425331	0.617676	#N/A	Peripheral	Bacteria	Firmicutes	Clostridia	Clostridiales	Ruminococcaceae	#N/A	#N/A
HM278046.1.1333	B1190_Nakamurella	46	0.00428873	0.0831758	2.19715	#N/A	Peripheral	Bacteria	Actinobacteria	Actinobacteria	Frankiales	Nakamurellaceae	Nakamurella	Nakamurella multipartita DSM 44233
e860fd661fedb5322c561adb0b68fd22	F125_o_Leucosporidiales	46	0.00192063	0	2.36516	#N/A	Peripheral	Fungi	Basidiomycota	Microbotryomycetes	Leucosporidiales	#N/A	#N/A	#N/A
SH174245.07FU_GU721359_refs	F31_Alternaria	46	0.00428352	0.467864	1.02109	#N/A	Peripheral	Fungi	Ascomycota	Dothideomycetes	Pleosporales	Pleosporaceae	Alternaria	unidentified
18c2716507ed103c488a8e4e5def55ba	A870_uncultured archaeon	45	1.2715e-05	0	0.576039	#N/A	Peripheral	Archaea	Euryarchaeota	Thermoplasmata	Marine Group II	uncultured archaeon	uncultured archaeon	uncultured archaeon
dfed5079d597fec914584ffb09c50de4	A545_uncultured archaeon	45	1.62469e-05	0.0434568	0.707064	#N/A	Peripheral	Archaea	Nanoarchaeaeota	Woesearchaeia	uncultured archaeon	uncultured archaeon	uncultured archaeon	uncultured archaeon
DQ125664.1.1451	B150_f_Micrococcaceae	45	0.00757663	0.361481	1.44112	#N/A	Peripheral	Bacteria	Actinobacteria	Actinobacteria	Micrococcales	Micrococcaceae	#N/A	#N/A
GQ495433.1.1251	B959_Jatrophihabitans	45	2.19065e-06	0.161975	0.122782	#N/A	Peripheral	Bacteria	Actinobacteria	Actinobacteria	Frankiales	Frankiaceae	Jatrophihabitans	#N/A
JX222293.1.1480	B772_Clostridium sensu stricto 1	45	3.31594e-06	0	0.47876	#N/A	Peripheral	Bacteria	Firmicutes	Clostridia	Clostridiales	Clostridiaceae 1	Clostridium sensu stricto 1	#N/A
KP096228.1.1283	B4603_Tolypothrix PCC-7601	45	5.2511e-05	0.0434568	0.581623	#N/A	Peripheral	Bacteria	Cyanobacteria	Oxyphotobacteria	Nostocales	Nostocaceae	Tolypothrix PCC-7601	#N/A
KP676773.1.1357	B2398_Roseomonas	45	3.32264e-05	0	0.478965	#N/A	Peripheral	Bacteria	Proteobacteria	Alphaproteobacteria	Acetobacterales	Acetobacteraceae	Roseomonas	bacterium EM0302
LN573059.1.1334	B390_metagenome	45	0.00683818	0.0859259	2.11315	#N/A	Peripheral	Bacteria	Chloroflexi	KD4-96	metagenome	metagenome	metagenome	metagenome
SH526501.07FU_JX339599_reps	F231_Tetracladium	45	0.00229085	0	2.28116	#N/A	Peripheral	Fungi	Ascomycota	Leotiomycetes	Helotiales	Helotiaceae	Tetracladium	#N/A
SH535943.07FU_JX385310_reps	F104_o_Pleosporales	45	0.00357013	0.32	1.52512	#N/A	Peripheral	Fungi	Ascomycota	Dothideomycetes	Pleosporales	#N/A	#N/A	#N/A
09c68a956853e4e654d8187a622f68bd	B6810_Haliangium	44	4.20383e-06	0.0867769	0.115852	#N/A	Peripheral	Bacteria	Proteobacteria	Deltaproteobacteria	Myxococcales	Haliangiaceae	Haliangium	#N/A
1b9820f6aa8935d2d9432f931bd2bd64	B2846_o_NA	44	4.00863e-05	0	0.540751	#N/A	Peripheral	Bacteria	Latescibacteria	#N/A	#N/A	#N/A	#N/A	#N/A
cfe65d85437cc30cd6a15de3a8e6535a	B3297_uncultured Prosthecobacter sp.	44	8.5428e-06	0	0.446076	#N/A	Peripheral	Bacteria	Verrucomicrobia	Verrucomicrobiae	Pedosphaerales	Pedosphaeraceae	uncultured Prosthecobacter sp.	uncultured Prosthecobacter sp.
EF018446.1.1369	B98_uncultured	44	0.00834321	0.0878099	2.02915	#N/A	Peripheral	Bacteria	Gemmatimonadetes	Gemmatimonadetes	Gemmatimonadales	Gemmatimonadaceae	uncultured	#N/A
FJ542890.1.1446	B1022_Novosphingobium	44	3.49703e-06	0	0.44667	#N/A	Peripheral	Bacteria	Proteobacteria	Alphaproteobacteria	Sphingomonadales	Sphingomonadaceae	Novosphingobium	#N/A
FPLS01009498.15.1476	B1345_Phenylobacterium	44	7.32353e-06	0.235537	0.0373683	#N/A	Peripheral	Bacteria	Proteobacteria	Alphaproteobacteria	Caulobacterales	Caulobacteraceae	Phenylobacterium	#N/A
FPLS01030589.10.1237	B279_f_Burkholderiaceae	44	0.00494724	0.372934	1.35711	#N/A	Peripheral	Bacteria	Proteobacteria	Gammaproteobacteria	Betaproteobacteriales	Burkholderiaceae	#N/A	#N/A
GQ396953.1.1502	B2643_Gemmatimonas	44	1.45919e-05	0	0.446076	#N/A	Peripheral	Bacteria	Gemmatimonadetes	Gemmatimonadetes	Gemmatimonadales	Gemmatimonadaceae	Gemmatimonas	uncultured Gemmatimonadaceae bacterium
HM263196.1.1366	B57_Conexibacter	44	3.7883e-06	0	0.677671	#N/A	Peripheral	Bacteria	Actinobacteria	Thermoleophilia	Solirubrobacterales	Solirubrobacteraceae	Conexibacter	#N/A
KP636085.1.1491	B8482_uncultured	44	4.39475e-06	0	0.581623	#N/A	Peripheral	Bacteria	Proteobacteria	Gammaproteobacteria	Xanthomonadales	Xanthomonadaceae	uncultured	#N/A
df43a7a11146f37fe1ca6d43936ecd35	F4274_o_NA	44	4.15897e-06	0.0867769	0.115852	#N/A	Peripheral	Fungi	#N/A	#N/A	#N/A	#N/A	#N/A	#N/A
SH175278.07FU_KM231823_refs	F36_Fusicolla	44	0.00804239	0.168388	1.86114	#N/A	Peripheral	Fungi	Ascomycota	Sordariomycetes	Hypocreales	Nectriaceae	Fusicolla	Fusicolla_aquaeductuum
SH218647.07FU_EF532828_reps	F171_Thanatephorus	44	0.00262003	0.0444215	2.11315	#N/A	Peripheral	Fungi	Basidiomycota	Agaricomycetes	Cantharellales	Ceratobasidiaceae	Thanatephorus	Thanatephorus_cucumeris
3c83e57675994e79f249847ced4eea9b	B9918_o_NA	43	5.74814e-06	0.205516	0.0373683	#N/A	Peripheral	Bacteria	Actinobacteria	MB-A2-108	#N/A	#N/A	#N/A	#N/A
AF524017.1.1242	B5452_Anaerolinea	43	4.55326e-06	0.04543	0.628293	#N/A	Peripheral	Bacteria	Chloroflexi	Anaerolineae	Anaerolineales	Anaerolineaceae	Anaerolinea	#N/A
AJ224989.1.1477	B6163_Novosphingobium	43	1.28483e-05	0	0.413186	#N/A	Peripheral	Bacteria	Proteobacteria	Alphaproteobacteria	Sphingomonadales	Sphingomonadaceae	Novosphingobium	#N/A
EF018497.1.1361	B58_uncultured Thermoflavimicrobium sp.	43	0.00138118	0	2.11315	#N/A	Peripheral	Bacteria	Chloroflexi	AD3	uncultured Thermoflavimicrobium sp.	uncultured Thermoflavimicrobium sp.	uncultured Thermoflavimicrobium sp.	uncultured Thermoflavimicrobium sp.
FPLL01003942.1.1456	B2345_Pajaroellobacter	43	3.09323e-06	0	0.505463	#N/A	Peripheral	Bacteria	Proteobacteria	Deltaproteobacteria	Myxococcales	Polyangiaceae	Pajaroellobacter	#N/A
HQ119166.1.1527	B1413_Subgroup 10	43	1.11474e-05	0.16874	0.0315338	#N/A	Peripheral	Bacteria	Acidobacteria	Thermoanaerobaculia	Thermoanaerobaculales	Thermoanaerobaculaceae	Subgroup 10	#N/A
HQ640540.1.1394	B1260_Ellin6067	43	0.000233699	0.04543	0.599742	#N/A	Peripheral	Bacteria	Proteobacteria	Gammaproteobacteria	Betaproteobacteriales	Nitrosomonadaceae	Ellin6067	uncultured prokaryote
3e29225860a39216dfaf7895fe3e8b6d	F188_unidentified	43	0.00254391	0	2.11315	#N/A	Peripheral	Fungi	unidentified	unidentified	unidentified	unidentified	unidentified	unidentified
c73fb831f756dde98d14169618f74ede	F143_unidentified	43	1.00448e-05	0	0.413186	#N/A	Peripheral	Fungi	unidentified	unidentified	unidentified	unidentified	unidentified	unidentified
EU155943.1.1446	A21_Methanosarcina	42	0.00486786	0.277778	1.44112	#N/A	Peripheral	Archaea	Euryarchaeota	Methanomicrobia	Methanosarcinales	Methanosarcinaceae	Methanosarcina	#N/A
3b755455a388eec171e66d2fc6c0e675	B4443_Anaerolinea	42	3.82085e-05	0.0464853	0.473463	#N/A	Peripheral	Bacteria	Chloroflexi	Anaerolineae	Anaerolineales	Anaerolineaceae	Anaerolinea	uncultured soil bacterium
AB240264.1.1516	B735_Anaeromyxobacter	42	5.95246e-05	0	0.599742	#N/A	Peripheral	Bacteria	Proteobacteria	Deltaproteobacteria	Myxococcales	Archangiaceae	Anaeromyxobacter	#N/A
AB240301.1.1433	B1516_o_NA	42	4.28039e-06	0	0.599742	#N/A	Peripheral	Bacteria	Acidobacteria	Subgroup 17	#N/A	#N/A	#N/A	#N/A
b0fefd1978947954f705423c2d571b92	B1494_f_Pedosphaeraceae	42	9.20842e-05	0.0464853	0.434887	#N/A	Peripheral	Bacteria	Verrucomicrobia	Verrucomicrobiae	Pedosphaerales	Pedosphaeraceae	#N/A	#N/A
f7f6fbdcf67aba2f1a5c2e4b72136a32	B4563_Pedosphaera	42	1.16189e-05	0.0464853	0.588908	#N/A	Peripheral	Bacteria	Verrucomicrobia	Verrucomicrobiae	Pedosphaerales	Pedosphaeraceae	Pedosphaera	#N/A
FQ659453.1.1376	B231_Haliangium	42	0.00319212	0.352608	1.27311	#N/A	Peripheral	Bacteria	Proteobacteria	Deltaproteobacteria	Myxococcales	Haliangiaceae	Haliangium	uncultured soil bacterium
GU208314.1.1458	B836_Sh765B-TzT-35	42	2.97133e-06	0	0.509516	#N/A	Peripheral	Bacteria	Rokubacteria	NC10	Methylomirabilales	Methylomirabilaceae	Sh765B-TzT-35	#N/A
KJ192083.1.1494	B323_Terrimonas	42	0.000146864	0.0464853	0.350401	#N/A	Peripheral	Bacteria	Bacteroidetes	Bacteroidia	Chitinophagales	Chitinophagaceae	Terrimonas	#N/A
58d93cf7810699675b7f00c7ceaed766	F2686_o_NA	42	3.61808e-06	0	0.470175	#N/A	Peripheral	Fungi	#N/A	#N/A	#N/A	#N/A	#N/A	#N/A
b5bf7c229b01840e12d5175d5552cdf9	F18_Schizothecium	42	0.0108308	0.218821	1.60912	#N/A	Peripheral	Fungi	Ascomycota	Sordariomycetes	Sordariales	Lasiosphaeriaceae	Schizothecium	Schizothecium_glutinans
fdd379ba814f8237c3d73ec5b713a8a2	F258_o_NA	42	0.0113282	0.244898	1.52512	#N/A	Peripheral	Fungi	#N/A	#N/A	#N/A	#N/A	#N/A	#N/A
3a3a52ca94143e4a1c660481824d3e6b	A659_uncultured archaeon	41	2.62222e-06	0	0.434887	#N/A	Peripheral	Archaea	Nanoarchaeaeota	Woesearchaeia	uncultured archaeon	uncultured archaeon	uncultured archaeon	uncultured archaeon
603f0e37e9f3fc904adfd0e427ffa1f7	A554_uncultured archaeon	41	5.02897e-06	0	0.347408	#N/A	Peripheral	Archaea	Nanoarchaeaeota	Woesearchaeia	uncultured archaeon	uncultured archaeon	uncultured archaeon	uncultured archaeon
4fdb8f2d3897edf0b914cfd717037363	B8217_f_Anaerolineaceae	41	1.75701e-06	0.0928019	0.0315338	#N/A	Peripheral	Bacteria	Chloroflexi	Anaerolineae	Anaerolineales	Anaerolineaceae	#N/A	#N/A
5e7bcdd28bb0708b6adfba3862dfeafa	B3274_Leptolinea	41	5.25693e-06	0	0.350401	#N/A	Peripheral	Bacteria	Chloroflexi	Anaerolineae	Anaerolineales	Anaerolineaceae	Leptolinea	#N/A
800ea8c9d3c23cf93a1b95fcba8a84bb	B2993_uncultured	41	1.37409e-06	0.0928019	0.0315338	#N/A	Peripheral	Bacteria	Chloroflexi	Anaerolineae	Anaerolineales	Anaerolineaceae	uncultured	#N/A
bf194074a8d2e1057620b4569a3b385f	B462_f_Anaerolineaceae	41	9.14947e-05	0.0475907	0.521813	#N/A	Peripheral	Bacteria	Chloroflexi	Anaerolineae	Anaerolineales	Anaerolineaceae	#N/A	#N/A
DQ066945.1.1383	B2937_Methylobacter	41	6.79496e-06	0	0.560778	#N/A	Peripheral	Bacteria	Proteobacteria	Gammaproteobacteria	Methylococcales	Methylomonaceae	Methylobacter	#N/A
FJ595568.1.1337	B6522_f_uncultured	41	8.03211e-06	0	0.560778	#N/A	Peripheral	Bacteria	Actinobacteria	Actinobacteria	Frankiales	uncultured	#N/A	#N/A
KP636127.1.1474	B6502_uncultured bacterium SJA-121	41	8.03325e-06	0.0928019	-0.0257561	#N/A	Peripheral	Bacteria	Armatimonadetes	uncultured	uncultured bacterium SJA-121	uncultured bacterium SJA-121	uncultured bacterium SJA-121	uncultured bacterium SJA-121
KR110077.1.1487	B4670_OLB12	41	4.30278e-05	0.0928019	0.401357	#N/A	Peripheral	Bacteria	Bacteroidetes	Bacteroidia	Cytophagales	Microscillaceae	OLB12	uncultured Bacteroidetes bacterium
e7eb4f31aaa8bde66d03fd5c7f55f26c	F173_unidentified	41	0.00356252	0.392623	1.02109	#N/A	Peripheral	Fungi	Chytridiomycota	unidentified	unidentified	unidentified	unidentified	unidentified
0d4eff436fec318b1254126f4539fbae	B5648_uncultured prokaryote	40	4.49039e-06	0	0.521813	#N/A	Peripheral	Bacteria	Chloroflexi	Anaerolineae	RBG-13-54-9	uncultured prokaryote	uncultured prokaryote	uncultured prokaryote
13e7239e669d9ab1e9fbe54db15a6c1b	B3696_uncultured Gemmatimonadetes bacterium	40	3.68557e-06	0	0.43741	#N/A	Peripheral	Bacteria	Chloroflexi	Anaerolineae	SBR1031	uncultured Gemmatimonadetes bacterium	uncultured Gemmatimonadetes bacterium	uncultured Gemmatimonadetes bacterium
452eba4023fe3a8bb4ef2ee258f61006	B9280_uncultured soil bacterium	40	1.13013e-06	0.18	-0.0195739	#N/A	Peripheral	Bacteria	Actinobacteria	Coriobacteriia	OPB41	uncultured soil bacterium	uncultured soil bacterium	uncultured soil bacterium
AB426195.1.1408	B466_Desulfobacca	40	6.58144e-07	0.18	-0.0195739	#N/A	Peripheral	Bacteria	Proteobacteria	Deltaproteobacteria	Syntrophobacterales	Syntrophaceae	Desulfobacca	#N/A
AB637161.1.1508	B4183_Bacillus	40	3.43024e-06	0.13875	-0.0246786	#N/A	Peripheral	Bacteria	Firmicutes	Bacilli	Bacillales	Bacillaceae	Bacillus	#N/A
GQ472429.1.1394	B2051_f_Acetobacteraceae	40	1.08844e-06	0.21875	-0.048045	#N/A	Peripheral	Bacteria	Proteobacteria	Alphaproteobacteria	Acetobacterales	Acetobacteraceae	#N/A	#N/A
GU208486.1.1466	B1925_uncultured prokaryote	40	8.64665e-07	0.04875	0.0315338	#N/A	Peripheral	Bacteria	Nitrospirae	4-29-1	uncultured prokaryote	uncultured prokaryote	uncultured prokaryote	uncultured prokaryote
HQ119153.1.1489	B1189_uncultured Acidobacteriaceae bacterium	40	0.000207217	0.04875	0.482849	#N/A	Peripheral	Bacteria	Acidobacteria	Acidobacteriia	Acidobacteriales	uncultured	uncultured Acidobacteriaceae bacterium	uncultured Acidobacteriaceae bacterium
JF167662.1.1343	B7315_Gemmatimonas	40	2.96e-05	0.04875	0.401357	#N/A	Peripheral	Bacteria	Gemmatimonadetes	Gemmatimonadetes	Gemmatimonadales	Gemmatimonadaceae	Gemmatimonas	#N/A
JQ684121.1.1461	B6900_Allorhizobium-Neorhizobium-Pararhizobium-Rhizobium	40	2.44415e-06	0.095	0.00342759	#N/A	Peripheral	Bacteria	Proteobacteria	Alphaproteobacteria	Rhizobiales	Rhizobiaceae	Allorhizobium-Neorhizobium-Pararhizobium-Rhizobium	#N/A
KY266810.1.1272	B6371_Micromonospora	40	2.26801e-05	0	0.314518	#N/A	Peripheral	Bacteria	Actinobacteria	Actinobacteria	Micromonosporales	Micromonosporaceae	Micromonospora	#N/A
LN570710.1.1362	B4885_Ohtaekwangia	40	4.54863e-06	0	0.314518	#N/A	Peripheral	Bacteria	Bacteroidetes	Bacteroidia	Cytophagales	Microscillaceae	Ohtaekwangia	metagenome
c9ad775c620bc345de35d8a11400b72a	F165_o_NA	40	0.0035519	0	1.86114	#N/A	Peripheral	Fungi	#N/A	#N/A	#N/A	#N/A	#N/A	#N/A
SH640095.07FU_KX514909_reps	F2084_unidentified	40	1.47765e-05	0.04875	0.510136	#N/A	Peripheral	Fungi	unidentified	unidentified	unidentified	unidentified	unidentified	unidentified
AB486113.1.1371	B260_Anaeromyxobacter	39	8.31899e-06	0.0973044	-0.0830724	#N/A	Peripheral	Bacteria	Proteobacteria	Deltaproteobacteria	Myxococcales	Archangiaceae	Anaeromyxobacter	#N/A
AB924400.1.1491	B3565_o_Sva0485	39	9.89955e-06	0.0499671	0.470751	#N/A	Peripheral	Bacteria	Proteobacteria	Deltaproteobacteria	Sva0485	#N/A	#N/A	#N/A
DQ137940.1.1221	B83_uncultured	39	0.00906671	0.499671	0.0970448	#N/A	Peripheral	Bacteria	Proteobacteria	Alphaproteobacteria	Rhizobiales	Methyloligellaceae	uncultured	#N/A
FR772068.1.1464	B793_Flavobacterium	39	0.00155813	0.260355	1.27311	#N/A	Peripheral	Bacteria	Bacteroidetes	Bacteroidia	Flavobacteriales	Flavobacteriaceae	Flavobacterium	#N/A
GQ500757.1.1448	B8202_Hyphomicrobium	39	8.30229e-07	0.184089	-0.048045	#N/A	Peripheral	Bacteria	Proteobacteria	Alphaproteobacteria	Rhizobiales	Hyphomicrobiaceae	Hyphomicrobium	uncultured Hyphomicrobiaceae bacterium
HM061755.1.1419	B171_Candidatus Koribacter	39	0.00028955	0.444444	0.685076	#N/A	Peripheral	Bacteria	Acidobacteria	Acidobacteriia	Acidobacteriales	Koribacteraceae	Candidatus Koribacter	#N/A
JF775628.1.1474	B91_RBG-16-58-14	39	0.00527009	0.274819	1.27311	#N/A	Peripheral	Bacteria	Chloroflexi	Anaerolineae	Anaerolineales	Anaerolineaceae	RBG-16-58-14	uncultured bacterium
JN643077.1.1258	B1002_Nitrospira	39	3.7861e-06	0	0.286222	#N/A	Peripheral	Bacteria	Nitrospirae	Nitrospira	Nitrospirales	Nitrospiraceae	Nitrospira	#N/A
JN684002.1.1497	B464_uncultured	39	0.000249979	0.0499671	0.24874	#N/A	Peripheral	Bacteria	Proteobacteria	Gammaproteobacteria	Xanthomonadales	Xanthomonadaceae	uncultured	uncultured Xanthomonadaceae bacterium
JQ689172.1.1435	B2074_f_Burkholderiaceae	39	1.26177e-05	0.0499671	0.470751	#N/A	Peripheral	Bacteria	Proteobacteria	Gammaproteobacteria	Betaproteobacteriales	Burkholderiaceae	#N/A	#N/A
KF515255.1.1509	B1983_f_uncultured	39	7.51263e-06	0	0.364311	#N/A	Peripheral	Bacteria	Actinobacteria	Thermoleophilia	Gaiellales	uncultured	#N/A	#N/A
KY190606.1.1438	B586_uncultured	39	0.00211435	0	1.77713	#N/A	Peripheral	Bacteria	Bacteroidetes	Bacteroidia	Chitinophagales	Saprospiraceae	uncultured	uncultured Haliscomenobacter sp.
70b7699d5cc8a16537e6c356f28f8a52	F3016_unidentified	39	2.98698e-06	0	0.286222	#N/A	Peripheral	Fungi	Rozellomycota	unidentified	unidentified	unidentified	unidentified	unidentified
7a772c20c0208dcd2219d867527d385e	A79_uncultured marine crenarchaeote E6-3G	38	0.00496256	0.234072	1.27311	#N/A	Peripheral	Archaea	Crenarchaeota	Bathyarchaeia	uncultured marine crenarchaeote E6-3G	uncultured marine crenarchaeote E6-3G	uncultured marine crenarchaeote E6-3G	uncultured marine crenarchaeote E6-3G
EU155939.1.1456	A120_f_uncultured	38	0.00199467	0.101108	1.52512	#N/A	Peripheral	Archaea	Euryarchaeota	Methanomicrobia	Methanomicrobiales	uncultured	#N/A	#N/A
861eb723bd9afaee99e222ff2a45facd	B3901_Anaeromyxobacter	38	1.50179e-05	0	0.24874	#N/A	Peripheral	Bacteria	Proteobacteria	Deltaproteobacteria	Myxococcales	Archangiaceae	Anaeromyxobacter	#N/A
AB672164.1.1453	B5040_uncultured	38	1.74246e-05	0	0.365304	#N/A	Peripheral	Bacteria	Proteobacteria	Gammaproteobacteria	Betaproteobacteriales	Burkholderiaceae	uncultured	#N/A
CU922866.1.1374	B64_uncultured bacterium 213	38	0.00275513	0.0512465	1.60912	#N/A	Peripheral	Bacteria	Acidobacteria	Subgroup 6	uncultured bacterium 213	uncultured bacterium 213	uncultured bacterium 213	uncultured bacterium 213
EF088329.1.1445	B7430_f_Clostridiaceae 1	38	2.82468e-06	0	0.329023	#N/A	Peripheral	Bacteria	Firmicutes	Clostridia	Clostridiales	Clostridiaceae 1	#N/A	#N/A
EU132738.1.1316	B1471_metagenome	38	7.4382e-07	0.188366	-0.076516	#N/A	Peripheral	Bacteria	Actinobacteria	MB-A2-108	metagenome	metagenome	metagenome	metagenome
EU644110.1.1462	B527_uncultured prokaryote	38	0.00423836	0	1.69313	#N/A	Peripheral	Bacteria	Actinobacteria	Thermoleophilia	Gaiellales	uncultured	uncultured prokaryote	uncultured prokaryote
GQ044204.1.1368	B2406_f_uncultured	38	2.93668e-05	0.099723	-0.111731	#N/A	Peripheral	Bacteria	Actinobacteria	Thermoleophilia	Gaiellales	uncultured	#N/A	#N/A
KX527708.1.1425	B7762_Bacillus	38	4.1077e-06	0	-0.0544143	#N/A	Peripheral	Bacteria	Firmicutes	Bacilli	Bacillales	Bacillaceae	Bacillus	#N/A
3c0150f5313fcc4ab51dbe054f79758e	F47_Schizothecium	38	0.00350771	0.0512465	1.60912	#N/A	Peripheral	Fungi	Ascomycota	Sordariomycetes	Sordariales	Lasiosphaeriaceae	Schizothecium	unidentified
553350a20503d82bb5a98c94a4237e6b	F3903_unidentified	38	4.16026e-06	0.228532	-0.104987	#N/A	Peripheral	Fungi	Chytridiomycota	unidentified	unidentified	unidentified	unidentified	unidentified
5f2e76286ca8a23b9d475e085fef8e10	F257_o_NA	38	0.00440036	0.101108	1.52512	#N/A	Peripheral	Fungi	#N/A	#N/A	#N/A	#N/A	#N/A	#N/A
SH182930.07FU_KP004452_refs	F133_Phaeosphaeria	38	0.00247208	0	1.69313	#N/A	Peripheral	Fungi	Ascomycota	Dothideomycetes	Pleosporales	Phaeosphaeriaceae	Phaeosphaeria	Phaeosphaeria_podocarpi
SH210381.07FU_JX845425_reps	F130_Peziza	38	0.0059281	0.265928	1.1891	#N/A	Peripheral	Fungi	Ascomycota	Pezizomycetes	Pezizales	Pezizaceae	Peziza	Peziza_nivalis
SH523901.07FU_LT548265_reps	F299_Rhodotorula	38	0.00183072	0	1.69313	#N/A	Peripheral	Fungi	Basidiomycota	Microbotryomycetes	Sporidiobolales	Sporidiobolaceae	Rhodotorula	unidentified
EU155897.1.1462	A36_Methanosarcina	37	0.00343033	0	1.60912	#N/A	Peripheral	Archaea	Euryarchaeota	Methanomicrobia	Methanosarcinales	Methanosarcinaceae	Methanosarcina	#N/A
2d55bb9e62b796aa9b039f274e735c59	B6507_Subgroup 10	37	4.06049e-05	0	0.293735	#N/A	Peripheral	Bacteria	Acidobacteria	Thermoanaerobaculia	Thermoanaerobaculales	Thermoanaerobaculaceae	Subgroup 10	#N/A
664546340e25eeb18d494ad081e8d3c8	B425_uncultured eubacterium WCHB1-50	37	0.00103187	0	1.60912	#N/A	Peripheral	Bacteria	Chloroflexi	Anaerolineae	RBG-13-54-9	uncultured eubacterium WCHB1-50	uncultured eubacterium WCHB1-50	uncultured eubacterium WCHB1-50
AB238766.1.1444	B313_uncultured bacterium	37	0.00502706	0.102264	1.44112	#N/A	Peripheral	Bacteria	Nitrospirae	Thermodesulfovibrionia	uncultured	uncultured bacterium	uncultured bacterium	uncultured bacterium
AY921680.1.1391	B4134_Methylobacter	37	0.000262551	0.149014	0.125774	#N/A	Peripheral	Bacteria	Proteobacteria	Gammaproteobacteria	Methylococcales	Methylomonaceae	Methylobacter	#N/A
EU131042.1.1470	B8400_Methylomicrobium	37	7.21743e-05	0.0525931	0.365955	#N/A	Peripheral	Bacteria	Proteobacteria	Gammaproteobacteria	Methylococcales	Methylomonaceae	Methylomicrobium	uncultured gamma proteobacterium
FPLS01037440.16.1551	B2316_f_Polyangiaceae	37	3.7477e-06	0	-0.0830724	#N/A	Peripheral	Bacteria	Proteobacteria	Deltaproteobacteria	Myxococcales	Polyangiaceae	#N/A	#N/A
GU208398.1.1452	B433_Syntrophobacter	37	0.00236002	0	1.60912	#N/A	Peripheral	Bacteria	Proteobacteria	Deltaproteobacteria	Syntrophobacterales	Syntrophobacteraceae	Syntrophobacter	uncultured prokaryote
JX505044.1.1413	B93_uncultured	37	0.00245981	0	1.60912	#N/A	Peripheral	Bacteria	Proteobacteria	Alphaproteobacteria	Rhizobiales	Methyloligellaceae	uncultured	uncultured Rhodobiaceae bacterium
JX505158.1.1481	B1559_uncultured Syntrophobacteraceae bacterium	37	6.2703e-06	0	0.222043	#N/A	Peripheral	Bacteria	Proteobacteria	Deltaproteobacteria	MBNT15	uncultured Syntrophobacteraceae bacterium	uncultured Syntrophobacteraceae bacterium	uncultured Syntrophobacteraceae bacterium
KF071117.1.1368	B9060_Bacillus	37	1.38382e-05	0	0.32925	#N/A	Peripheral	Bacteria	Firmicutes	Bacilli	Bacillales	Bacillaceae	Bacillus	#N/A
KF469206.1.1482	B2049_uncultured	37	3.35082e-05	0.102264	0.352594	#N/A	Peripheral	Bacteria	Proteobacteria	Deltaproteobacteria	Syntrophobacterales	Syntrophaceae	uncultured	uncultured delta proteobacterium
KP896360.1.1422	B2280_uncultured prokaryote	37	1.97756e-06	0.233747	-0.133458	#N/A	Peripheral	Bacteria	Nitrospinae	P9X2b3D02	uncultured prokaryote	uncultured prokaryote	uncultured prokaryote	uncultured prokaryote
KX505017.1.1530	B427_uncultured Spirochaetales bacterium	37	1.40696e-06	0	0.32925	#N/A	Peripheral	Bacteria	Proteobacteria	Deltaproteobacteria	Sva0485	uncultured Spirochaetales bacterium	uncultured Spirochaetales bacterium	uncultured Spirochaetales bacterium
c500f2af908aab02ccebf1a917fdfbd6	F202_Mortierella	37	0.00293573	0.233747	1.1891	#N/A	Peripheral	Fungi	Mortierellomycota	Mortierellomycetes	Mortierellales	Mortierellaceae	Mortierella	Mortierella_angusta
0488f91ec4677ec5f4bb93f41f505822	B2972_uncultured prokaryote	36	1.78616e-06	0	0.258447	#N/A	Peripheral	Bacteria	Chloroflexi	Anaerolineae	RBG-13-54-9	uncultured prokaryote	uncultured prokaryote	uncultured prokaryote
462768e732d5055a6aeeef37cf44d8c6	B2034_AKIW659	36	0.00117062	0.424383	-0.163033	#N/A	Peripheral	Bacteria	Acidobacteria	Acidobacteriia	Solibacterales	Solibacteraceae (Subgroup 3)	AKIW659	uncultured Acidobacterium sp.
AB600426.1.1396	B1449_f_Rhodocyclaceae	36	3.08538e-05	0	0.293197	#N/A	Peripheral	Bacteria	Proteobacteria	Gammaproteobacteria	Betaproteobacteriales	Rhodocyclaceae	#N/A	#N/A
AY326604.1.1411	B37_uncultured	36	0.00163759	0.0540123	1.44112	#N/A	Peripheral	Bacteria	Proteobacteria	Alphaproteobacteria	Rhizobiales	Xanthobacteraceae	uncultured	#N/A
EU644259.1.1454	B5025_uncultured prokaryote	36	7.10337e-06	0	0.365955	#N/A	Peripheral	Bacteria	Chloroflexi	KD4-96	uncultured prokaryote	uncultured prokaryote	uncultured prokaryote	uncultured prokaryote
FQ659752.1.1370	B108_uncultured prokaryote	36	0.00610834	0.364198	0.853084	#N/A	Peripheral	Bacteria	Acidobacteria	Subgroup 17	uncultured prokaryote	uncultured prokaryote	uncultured prokaryote	uncultured prokaryote
HM992485.1.1480	B3867_Geobacter	36	3.23647e-06	0	-0.111731	#N/A	Peripheral	Bacteria	Proteobacteria	Deltaproteobacteria	Desulfuromonadales	Geobacteraceae	Geobacter	Geobacter psychrophilus
JN409232.1.1408	B7393_Plot4-2H12	36	1.9149e-06	0.104938	-0.108997	#N/A	Peripheral	Bacteria	Proteobacteria	Alphaproteobacteria	Sphingomonadales	Sphingomonadaceae	Plot4-2H12	#N/A
LN563950.1.1319	B6669_uncultured	36	1.50065e-06	0	0.189953	#N/A	Peripheral	Bacteria	Proteobacteria	Alphaproteobacteria	Micropepsales	Micropepsaceae	uncultured	#N/A
10f0295ec6534abf94d4ad4c57fbcff6	F4325_o_NA	36	6.23752e-07	0.0540123	-0.0808911	#N/A	Peripheral	Fungi	#N/A	#N/A	#N/A	#N/A	#N/A	#N/A
c65a9336b260f0bdc95a4417851791a1	F3366_unidentified	36	4.08609e-06	0	0.182961	#N/A	Peripheral	Fungi	Ascomycota	Dothideomycetes	Capnodiales	unidentified	unidentified	unidentified
JX023134.1.973	A7_f_uncultured	35	0.00900571	0.339592	0.853084	#N/A	Peripheral	Archaea	Euryarchaeota	Methanomicrobia	Methanomicrobiales	uncultured	#N/A	#N/A
16325ddd3960f1872bcb4791a254c781	B667_uncultured Prosthecobacter sp.	35	0.00221487	0	1.44112	#N/A	Peripheral	Bacteria	Verrucomicrobia	Verrucomicrobiae	Pedosphaerales	Pedosphaeraceae	uncultured Prosthecobacter sp.	uncultured Prosthecobacter sp.
657f6331a5eb9fb8ccf6a1fc8e965ea8	B6377_uncultured prokaryote	35	4.92791e-05	0	0.157864	#N/A	Peripheral	Bacteria	Chloroflexi	Anaerolineae	RBG-13-54-9	uncultured prokaryote	uncultured prokaryote	uncultured prokaryote
AB512285.1.1478	B2711_Angustibacter	35	1.53854e-05	0.0555102	-0.169047	#N/A	Peripheral	Bacteria	Actinobacteria	Actinobacteria	Kineosporiales	Kineosporiaceae	Angustibacter	#N/A
c34506784d6d4d6575a1be764fa8e1b6	B429_uncultured bacterium DA038	35	2.49047e-07	0.0555102	-0.108997	#N/A	Peripheral	Bacteria	Acidobacteria	Acidobacteriia	Acidobacteriales	uncultured	uncultured bacterium DA038	uncultured bacterium DA038
d18865d447327ab3f1a91e938389ff75	B6921_f_Ruminococcaceae	35	9.08846e-07	0	0.223159	#N/A	Peripheral	Bacteria	Firmicutes	Clostridia	Clostridiales	Ruminococcaceae	#N/A	#N/A
DQ017938.1.1442	B134_Pseudolabrys	35	0.000979518	0.0555102	1.35711	#N/A	Peripheral	Bacteria	Proteobacteria	Alphaproteobacteria	Rhizobiales	Xanthobacteraceae	Pseudolabrys	#N/A
JF211012.1.1366	B492_Arenimonas	35	1.56356e-06	0.107755	-0.137104	#N/A	Peripheral	Bacteria	Proteobacteria	Gammaproteobacteria	Xanthomonadales	Xanthomonadaceae	Arenimonas	Arenimonas oryziterrae DSM 21050 = YC6267
KC554089.1.1514	B5384_f_Micromonosporaceae	35	5.41936e-07	0.202449	-0.161929	#N/A	Peripheral	Bacteria	Actinobacteria	Actinobacteria	Micromonosporales	Micromonosporaceae	#N/A	#N/A
19b2b23e77a731afe07ecdd1bdef53d6	F470_Mortierella	35	0.00616529	0.0555102	1.35711	#N/A	Peripheral	Fungi	Mortierellomycota	Mortierellomycetes	Mortierellales	Mortierellaceae	Mortierella	unidentified
8a15e8a655bddf4ed5de5eee91d7d74b	F260_unidentified	35	0.00466152	0.202449	1.1051	#N/A	Peripheral	Fungi	unidentified	unidentified	unidentified	unidentified	unidentified	unidentified
949d7e0ffd5120fc82ce107d7155ba7c	F1040_o_NA	35	2.28785e-05	0	0.257144	#N/A	Peripheral	Fungi	#N/A	#N/A	#N/A	#N/A	#N/A	#N/A
a52646ac5d66a44825189233c9c1dc24	A842_Diapherotrites archaeon SCGC AAA011-K09	34	7.35046e-06	0.0570934	-0.197705	#N/A	Peripheral	Archaea	Diapherotrites	Iainarchaeia	Iainarchaeales	Diapherotrites archaeon SCGC AAA011-K09	Diapherotrites archaeon SCGC AAA011-K09	Diapherotrites archaeon SCGC AAA011-K09
AB161349.1.938	A572_uncultured crenarchaeote	34	6.52804e-06	0.110727	-0.226363	#N/A	Peripheral	Archaea	Asgardaeota	Odinarchaeia	uncultured crenarchaeote	uncultured crenarchaeote	uncultured crenarchaeote	uncultured crenarchaeote
6784e6798a08b0401e295d3593b99102	B1587_Anaerolinea	34	7.92879e-07	0	0.125774	#N/A	Peripheral	Bacteria	Chloroflexi	Anaerolineae	Anaerolineales	Anaerolineaceae	Anaerolinea	uncultured bacterium
73b55bbf9c6a0e1a6addf5b20891224c	B4394_uncultured Spirochaetales bacterium	34	6.51435e-06	0	0.117182	#N/A	Peripheral	Bacteria	Proteobacteria	Deltaproteobacteria	Sva0485	uncultured Spirochaetales bacterium	uncultured Spirochaetales bacterium	uncultured Spirochaetales bacterium
AB364803.1.1471	B1475_uncultured bacterium	34	1.60919e-06	0.207612	-0.1904	#N/A	Peripheral	Bacteria	Acidobacteria	Acidobacteriia	Subgroup 13	uncultured bacterium	uncultured bacterium	uncultured bacterium
AB672212.1.1423	B271_Anaerolinea	34	0.00313741	0.261246	0.937089	#N/A	Peripheral	Bacteria	Chloroflexi	Anaerolineae	Anaerolineales	Anaerolineaceae	Anaerolinea	#N/A
EF515998.1.1439	B2472_f_Fimbriimonadaceae	34	0.000928415	0.455017	0.433062	#N/A	Peripheral	Bacteria	Armatimonadetes	Fimbriimonadia	Fimbriimonadales	Fimbriimonadaceae	#N/A	#N/A
EU133459.1.1317	B100_Sphingomonas	34	0.00275384	0	1.35711	#N/A	Peripheral	Bacteria	Proteobacteria	Alphaproteobacteria	Sphingomonadales	Sphingomonadaceae	Sphingomonas	#N/A
HM334175.1.1361	B5912_Nitrospira	34	6.89479e-05	0.0570934	0.152583	#N/A	Peripheral	Bacteria	Nitrospirae	Nitrospira	Nitrospirales	Nitrospiraceae	Nitrospira	uncultured Nitrospirales bacterium
JHVO01000026.12.1514	B126_Blastococcus	34	0.0012276	0	1.35711	#N/A	Peripheral	Bacteria	Actinobacteria	Actinobacteria	Frankiales	Geodermatophilaceae	Blastococcus	Geodermatophilaceae bacterium URHB0062
JPRS01000598.3975.5519	B1942_Cryobacterium	34	0.000212654	0.110727	0.234438	#N/A	Peripheral	Bacteria	Actinobacteria	Actinobacteria	Micrococcales	Microbacteriaceae	Cryobacterium	#N/A
KF956463.1.1412	B645_uncultured Chloroflexi bacterium	34	0.000584186	0	1.35711	#N/A	Peripheral	Bacteria	Chloroflexi	OLB14	uncultured Chloroflexi bacterium	uncultured Chloroflexi bacterium	uncultured Chloroflexi bacterium	uncultured Chloroflexi bacterium
KM250920.1.1453	B1118_Herminiimonas	34	0.00323797	0.0570934	1.27311	#N/A	Peripheral	Bacteria	Proteobacteria	Gammaproteobacteria	Betaproteobacteriales	Burkholderiaceae	Herminiimonas	#N/A
6b52cc1a948efef50e988351b9251179	F1439_unidentified	34	0.00271501	0.0570934	1.27311	#N/A	Peripheral	Fungi	unidentified	unidentified	unidentified	unidentified	unidentified	unidentified
8650f2eef8f46db70b50b3788c300db4	F2441_unidentified	34	3.44188e-06	0	0.117182	#N/A	Peripheral	Fungi	unidentified	unidentified	unidentified	unidentified	unidentified	unidentified
cd40d453b5fdbd7b320363b639df8c24	F319_unidentified	34	0.00123337	0.5	-0.070964	#N/A	Peripheral	Fungi	unidentified	unidentified	unidentified	unidentified	unidentified	unidentified
88afc8614f1d57b6b52a80a5d6da0e1d	B2748_uncultured	33	0.000338507	0.367309	-0.426971	#N/A	Peripheral	Bacteria	Chloroflexi	Anaerolineae	Anaerolineales	Anaerolineaceae	uncultured	#N/A
9f8921d2026d5151b85cd45c07437a1d	B5902_uncultured bacterium mle1-16	33	3.07728e-06	0.165289	-0.221422	#N/A	Peripheral	Bacteria	Latescibacteria	uncultured bacterium mle1-16	uncultured bacterium mle1-16	uncultured bacterium mle1-16	uncultured bacterium mle1-16	uncultured bacterium mle1-16
b13d25d2535d65d2e192530a7fcea1dc	B9094_uncultured bacterium	33	1.148e-06	0.257117	-0.247343	#N/A	Peripheral	Bacteria	Nitrospirae	Thermodesulfovibrionia	uncultured	uncultured bacterium	uncultured bacterium	uncultured bacterium
FR749751.1.1487	B2426_Pedobacter	33	5.47628e-06	0.113866	-0.255022	#N/A	Peripheral	Bacteria	Bacteroidetes	Bacteroidia	Sphingobacteriales	Sphingobacteriaceae	Pedobacter	Pedobacter sp. MSCB-14
HE653848.1.1449	B4199_f_0319-6G20	33	2.93111e-06	0	-0.197705	#N/A	Peripheral	Bacteria	Proteobacteria	Deltaproteobacteria	Oligoflexales	0319-6G20	#N/A	#N/A
HG423553.1.1283	B420_Caulobacter	33	0.00111095	0.115702	1.1051	#N/A	Peripheral	Bacteria	Proteobacteria	Alphaproteobacteria	Caulobacterales	Caulobacteraceae	Caulobacter	#N/A
KF515263.1.1493	B361_f_SC-I-84	33	2.30914e-05	0.0587695	0.0615949	#N/A	Peripheral	Bacteria	Proteobacteria	Gammaproteobacteria	Betaproteobacteriales	SC-I-84	#N/A	#N/A
b29da98bec34d49869abd663c585d283	F1387_o_NA	33	0.0023179	0.113866	1.1051	#N/A	Peripheral	Fungi	#N/A	#N/A	#N/A	#N/A	#N/A	#N/A
d5e2e19eafe50a0609545594758e533a	F771_o_NA	33	0.00389534	0.218549	0.937089	#N/A	Peripheral	Fungi	#N/A	#N/A	#N/A	#N/A	#N/A	#N/A
43ed988a5471a48667ba452456051c28	A684_o_NA	32	3.43507e-07	0	0.0514033	#N/A	Peripheral	Archaea	Nanoarchaeaeota	Woesearchaeia	#N/A	#N/A	#N/A	#N/A
f7375debc89fe2e074b2e43c70caba54	A1130_Candidatus Iainarchaeum	32	1.88131e-06	0	-0.226363	#N/A	Peripheral	Archaea	Diapherotrites	Iainarchaeia	Iainarchaeales	Iainarchaeaceae	Candidatus Iainarchaeum	Candidatus Iainarchaeum andersonii SCGC AAA011-E11
HE796197.1.926	A23_uncultured methanogenic archaeon	32	0.0014513	0.117188	1.02109	#N/A	Peripheral	Archaea	Crenarchaeota	Bathyarchaeia	uncultured methanogenic archaeon	uncultured methanogenic archaeon	uncultured methanogenic archaeon	uncultured methanogenic archaeon
390b29d38c4cbe6432e8fea431b76ed6	B1749_Anaeromyxobacter	32	0.00038664	0	1.1891	#N/A	Peripheral	Bacteria	Proteobacteria	Deltaproteobacteria	Myxococcales	Archangiaceae	Anaeromyxobacter	#N/A
448d192674c0903bcf1e4631d587d356	B4530_uncultured bacterium	32	2.59096e-06	0.117188	-0.221422	#N/A	Peripheral	Bacteria	Chloroflexi	Anaerolineae	SBR1031	uncultured bacterium	uncultured bacterium	uncultured bacterium
6be603d1ac48baf753c82adf6d982694	B4531_uncultured	32	2.98553e-05	0.0605469	0.0295052	#N/A	Peripheral	Bacteria	Proteobacteria	Deltaproteobacteria	Desulfarculales	Desulfarculaceae	uncultured	delta proteobacterium WX81
9bc20adf180399338aca9a3cd17d3dca	B438_uncultured	32	0.000440924	0	1.1891	#N/A	Peripheral	Bacteria	Chloroflexi	Anaerolineae	Anaerolineales	Anaerolineaceae	uncultured	#N/A
AB476694.1.1526	B749_Thiobacillus	32	2.18974e-06	0.263672	-0.275814	#N/A	Peripheral	Bacteria	Proteobacteria	Gammaproteobacteria	Betaproteobacteriales	Hydrogenophilaceae	Thiobacillus	#N/A
EF018794.1.1350	B1187_uncultured forest soil bacterium	32	0.000101124	0.0605469	0.0295052	#N/A	Peripheral	Bacteria	Acidobacteria	Acidobacteriia	Acidobacteriales	uncultured	uncultured forest soil bacterium	uncultured forest soil bacterium
EU133709.1.1380	B871_Terrimonas	32	1.11735e-05	0.0605469	0.195052	#N/A	Peripheral	Bacteria	Bacteroidetes	Bacteroidia	Chitinophagales	Chitinophagaceae	Terrimonas	#N/A
EU488419.1.1514	B9728_f_SG8-4	32	3.48629e-06	0	-0.226363	#N/A	Peripheral	Bacteria	Planctomycetes	Phycisphaerae	MSBL9	SG8-4	#N/A	#N/A
EU881215.1.1522	B463_ADurb.Bin063-1	32	0.00108779	0.119141	1.02109	#N/A	Peripheral	Bacteria	Verrucomicrobia	Verrucomicrobiae	Pedosphaerales	Pedosphaeraceae	ADurb.Bin063-1	uncultured Verrucomicrobia subdivision 3 bacterium
FJ004748.1.1319	B252_Candidatus Solibacter	32	0.000607676	0.314453	0.685076	#N/A	Peripheral	Bacteria	Acidobacteria	Acidobacteriia	Solibacterales	Solibacteraceae (Subgroup 3)	Candidatus Solibacter	#N/A
FPLS01009478.18.1542	B8353_f_67-14	32	1.52955e-06	0.21875	-0.247343	#N/A	Peripheral	Bacteria	Actinobacteria	Thermoleophilia	Solirubrobacterales	67-14	#N/A	#N/A
HQ330542.1.1415	B1421_Syntrophorhabdus	32	5.13e-06	0.0605469	0.195052	#N/A	Peripheral	Bacteria	Proteobacteria	Deltaproteobacteria	Deltaproteobacteria Incertae Sedis	Syntrophorhabdaceae	Syntrophorhabdus	uncultured Syntrophorhabdaceae bacterium
JN379402.1.1475	B5032_f_Clostridiaceae 1	32	7.41106e-07	0.0605469	-0.193316	#N/A	Peripheral	Bacteria	Firmicutes	Clostridia	Clostridiales	Clostridiaceae 1	#N/A	#N/A
JN609324.1.1468	B6644_f_Fimbriimonadaceae	32	5.72088e-06	0	0.117295	#N/A	Peripheral	Bacteria	Armatimonadetes	Fimbriimonadia	Fimbriimonadales	Fimbriimonadaceae	#N/A	#N/A
JX521039.1.1534	B580_Aetherobacter	32	0.00106042	0	1.1891	#N/A	Peripheral	Bacteria	Proteobacteria	Deltaproteobacteria	Myxococcales	Polyangiaceae	Aetherobacter	#N/A
KJ600909.1.1502	B4776_Mucilaginibacter	32	1.46191e-05	0	0.117295	#N/A	Peripheral	Bacteria	Bacteroidetes	Bacteroidia	Sphingobacteriales	Sphingobacteriaceae	Mucilaginibacter	#N/A
KM287502.1.1416	B358_uncultured	32	0.00198235	0	1.1891	#N/A	Peripheral	Bacteria	Proteobacteria	Gammaproteobacteria	Betaproteobacteriales	Burkholderiaceae	uncultured	#N/A
KX753138.1.1478	B887_uncultured	32	2.2421e-06	0	0.117295	#N/A	Peripheral	Bacteria	Planctomycetes	Planctomycetacia	Pirellulales	Pirellulaceae	uncultured	uncultured Planctomycetaceae bacterium
MBRD01000032.75.1561	B7322_Nostoc PCC-7107	32	4.49006e-05	0	0.0615949	#N/A	Peripheral	Bacteria	Cyanobacteria	Oxyphotobacteria	Nostocales	Nostocaceae	Nostoc PCC-7107	Nostoc sp. MBR 210
9c589a0cf9fa3cc61554e5b0d814a9af	F865_o_NA	32	0.00277426	0.119141	1.02109	#N/A	Peripheral	Fungi	#N/A	#N/A	#N/A	#N/A	#N/A	#N/A
KF758471.1.1250	A33_uncultured methanogenic archaeon	31	0.00221863	0	1.1051	#N/A	Peripheral	Archaea	Crenarchaeota	Bathyarchaeia	uncultured methanogenic archaeon	uncultured methanogenic archaeon	uncultured methanogenic archaeon	uncultured methanogenic archaeon
583c04f9ec66bf96a89d649022fa04d4	B183_f_uncultured	31	0.00433898	0.122789	0.937089	#N/A	Peripheral	Bacteria	Acidobacteria	Acidobacteriia	Acidobacteriales	uncultured	#N/A	#N/A
5e4de6a3427e6d842afca35d9b7c0f64	B8178_f_uncultured	31	1.8633e-06	0.174818	-0.277635	#N/A	Peripheral	Bacteria	Actinobacteria	Thermoleophilia	Gaiellales	uncultured	#N/A	#N/A
AB364828.1.1484	B5182_Sh765B-TzT-35	31	5.37104e-07	0	0.0295052	#N/A	Peripheral	Bacteria	Rokubacteria	NC10	Methylomirabilales	Methylomirabilaceae	Sh765B-TzT-35	uncultured bacterium
AB486908.1.1338	B2544_f_Clostridiaceae 1	31	1.32282e-06	0	0.171132	#N/A	Peripheral	Bacteria	Firmicutes	Clostridia	Clostridiales	Clostridiaceae 1	#N/A	#N/A
AB594690.1.1434	B1084_Clostridium sensu stricto 5	31	2.61091e-06	0.062435	0.155667	#N/A	Peripheral	Bacteria	Firmicutes	Clostridia	Clostridiales	Clostridiaceae 1	Clostridium sensu stricto 5	#N/A
AB748636.1.1480	B1265_Geobacter	31	6.87861e-07	0.062435	0.155667	#N/A	Peripheral	Bacteria	Proteobacteria	Deltaproteobacteria	Desulfuromonadales	Geobacteraceae	Geobacter	#N/A
b0ae8ca7cb55016ed7cb7c58a60e9a35	B4756_f_uncultured	31	9.71961e-07	0	0.0820073	#N/A	Peripheral	Bacteria	Actinobacteria	Thermoleophilia	Gaiellales	uncultured	#N/A	#N/A
CP003360.3288170.3289606	B481_Desulfomonile	31	0.00303488	0.122789	0.937089	#N/A	Peripheral	Bacteria	Proteobacteria	Deltaproteobacteria	Syntrophobacterales	Syntrophaceae	Desulfomonile	uncultured Desulfomonile sp.
DQ125808.1.1473	B3771_Gaiella	31	5.64254e-06	0	0.171132	#N/A	Peripheral	Bacteria	Actinobacteria	Thermoleophilia	Gaiellales	Gaiellaceae	Gaiella	Gaiella occulta
EF019249.1.1402	B3891_uncultured Acidobacterium sp.	31	2.07122e-05	0.062435	-0.0025844	#N/A	Peripheral	Bacteria	Latescibacteria	uncultured Acidobacterium sp.	uncultured Acidobacterium sp.	uncultured Acidobacterium sp.	uncultured Acidobacterium sp.	uncultured Acidobacterium sp.
EU134810.1.1342	B484_uncultured	31	4.66633e-07	0	0.0185139	#N/A	Peripheral	Bacteria	Gemmatimonadetes	Gemmatimonadetes	Gemmatimonadales	Gemmatimonadaceae	uncultured	uncultured proteobacterium
EU937836.1.1449	B10_f_Xanthobacteraceae	31	0.00114192	0.174818	0.853084	#N/A	Peripheral	Bacteria	Proteobacteria	Alphaproteobacteria	Rhizobiales	Xanthobacteraceae	#N/A	#N/A
FN824847.1.1261	B4063_Bryobacter	31	1.68845e-06	0	0.0295052	#N/A	Peripheral	Bacteria	Acidobacteria	Acidobacteriia	Solibacterales	Solibacteraceae (Subgroup 3)	Bryobacter	uncultured bacterium
GQ397061.1.1516	B2839_Gaiella	31	2.80929e-06	0	0.171132	#N/A	Peripheral	Bacteria	Actinobacteria	Thermoleophilia	Gaiellales	Gaiellaceae	Gaiella	#N/A
JF027785.1.1358	B221_Nocardioides	31	0.00171737	0.062435	1.02109	#N/A	Peripheral	Bacteria	Actinobacteria	Actinobacteria	Propionibacteriales	Nocardioidaceae	Nocardioides	#N/A
JN604664.1.1223	B2702_Subgroup 10	31	4.85483e-07	0	0.171132	#N/A	Peripheral	Bacteria	Acidobacteria	Thermoanaerobaculia	Thermoanaerobaculales	Thermoanaerobaculaceae	Subgroup 10	Acidobacteria bacterium WX184
KY190668.1.1409	B1292_Sphingomonas	31	6.79349e-05	0.120708	0.0408249	#N/A	Peripheral	Bacteria	Proteobacteria	Alphaproteobacteria	Sphingomonadales	Sphingomonadaceae	Sphingomonas	#N/A
1cc9ab55129aadcb2dcac31d6a9d7613	F5243_Acremonium	31	2.36815e-06	0.224766	-0.275814	#N/A	Peripheral	Fungi	Ascomycota	Sordariomycetes	Hypocreales	Hypocreales_fam_Incertae_sedis	Acremonium	Acremonium_dichromosporum
460713e5dac20b226d985904c1ba142a	F576_unidentified	31	0.00323749	0.062435	1.02109	#N/A	Peripheral	Fungi	Mucoromycota	Endogonomycetes	Endogonales	unidentified	unidentified	unidentified
SH185871.07FU_JQ692165_reps	F294_Pyricularia	31	0.000573244	0	1.1051	#N/A	Peripheral	Fungi	Ascomycota	Sordariomycetes	Magnaporthales	Magnaporthaceae	Pyricularia	unidentified
2f8b858b5206dd8442b7ee96b799ac8d	A679_Candidatus Diapherotrites archaeon ADurb.Bin253	30	9.28171e-07	0	-0.0025844	#N/A	Peripheral	Archaea	Nanoarchaeaeota	Woesearchaeia	Candidatus Diapherotrites archaeon ADurb.Bin253	Candidatus Diapherotrites archaeon ADurb.Bin253	Candidatus Diapherotrites archaeon ADurb.Bin253	Candidatus Diapherotrites archaeon ADurb.Bin253
985aeee499977d279437ad821535bca2	B1939_Bryobacter	30	6.44585e-06	0.0644444	-0.312338	#N/A	Peripheral	Bacteria	Acidobacteria	Acidobacteriia	Solibacterales	Solibacteraceae (Subgroup 3)	Bryobacter	uncultured Solibacteraceae bacterium
AB672314.1.1440	B244_o_NA	30	0.00186414	0.0644444	0.937089	#N/A	Peripheral	Bacteria	Actinobacteria	MB-A2-108	#N/A	#N/A	#N/A	#N/A
b2df2ce56b6a895a6c1c1d9ef8b851c6	B4645_o_SAR202 clade	30	4.87982e-05	0.18	-0.305741	#N/A	Peripheral	Bacteria	Chloroflexi	Dehalococcoidia	SAR202 clade	#N/A	#N/A	#N/A
FPLS01019439.1.1235	B786_o_CCD24	30	1.45093e-06	0.124444	-0.277635	#N/A	Peripheral	Bacteria	Proteobacteria	Gammaproteobacteria	CCD24	#N/A	#N/A	#N/A
GU208219.1.1518	B152_uncultured prokaryote	30	0.00255195	0	1.02109	#N/A	Peripheral	Bacteria	Acidobacteria	Subgroup 17	uncultured prokaryote	uncultured prokaryote	uncultured prokaryote	uncultured prokaryote
HM243793.1.1463	B1422_uncultured	30	0.000468929	0.24	0.685076	#N/A	Peripheral	Bacteria	Chloroflexi	Anaerolineae	Anaerolineales	Anaerolineaceae	uncultured	#N/A
KF459924.1.1432	B3273_Solirubrobacter	30	2.81893e-07	0	-0.0025844	#N/A	Peripheral	Bacteria	Actinobacteria	Thermoleophilia	Solirubrobacterales	Solirubrobacteraceae	Solirubrobacter	#N/A
KJ615290.1.1330	B957_Polaromonas	30	0.000842761	0.0644444	0.937089	#N/A	Peripheral	Bacteria	Proteobacteria	Gammaproteobacteria	Betaproteobacteriales	Burkholderiaceae	Polaromonas	#N/A
KM205530.1.1438	B343_uncultured	30	5.89994e-07	0	-0.0025844	#N/A	Peripheral	Bacteria	Gemmatimonadetes	Gemmatimonadetes	Gemmatimonadales	Gemmatimonadaceae	uncultured	#N/A
KP204870.1.1216	B7_f_Micrococcaceae	30	0.00386236	0.0644444	0.937089	#N/A	Peripheral	Bacteria	Actinobacteria	Actinobacteria	Micrococcales	Micrococcaceae	#N/A	#N/A
SH097862.07FU_HE610335_refs	F1257_Coniochaeta	30	0.00115125	0.32	0.517067	#N/A	Peripheral	Fungi	Ascomycota	Sordariomycetes	Coniochaetales	Coniochaetaceae	Coniochaeta	#N/A
SH204425.07FU_GU721349_reps	F498_Fusarium	30	1.49825e-06	0	0.0467193	#N/A	Peripheral	Fungi	Ascomycota	Sordariomycetes	Hypocreales	Nectriaceae	Fusarium	#N/A
EU519299.1.1054	A19_Methanocella	29	0.00753035	0.601665	-0.238973	#N/A	Peripheral	Archaea	Euryarchaeota	Methanomicrobia	Methanocellales	Methanocellaceae	Methanocella	#N/A
56012dfa1137502b4a716400a35df702	B1013_uncultured	29	4.56839e-07	0.0665874	0.0768956	#N/A	Peripheral	Bacteria	Chloroflexi	Anaerolineae	Anaerolineales	Anaerolineaceae	uncultured	uncultured prokaryote
AM936702.1.1339	B303_Mycobacterium	29	0.00344973	1.11022e-16	0.937089	#N/A	Peripheral	Bacteria	Actinobacteria	Actinobacteria	Corynebacteriales	Mycobacteriaceae	Mycobacterium	#N/A
bd3d1d5c4f81f9e7b1d831f0cfbab9b5	B3548_f_WD2101 soil group	29	1.36392e-06	0.128419	-0.305741	#N/A	Peripheral	Bacteria	Planctomycetes	Phycisphaerae	Tepidisphaerales	WD2101 soil group	#N/A	#N/A
DQ520185.1.1489	B401_uncultured prokaryote	29	4.13047e-06	0.0665874	0.0768956	#N/A	Peripheral	Bacteria	Acidobacteria	Subgroup 17	uncultured prokaryote	uncultured prokaryote	uncultured prokaryote	uncultured prokaryote
EU778761.1.1359	B5047_Lysinibacillus	29	0.000244906	0.0665874	-0.0801543	#N/A	Peripheral	Bacteria	Firmicutes	Bacilli	Bacillales	Planococcaceae	Lysinibacillus	#N/A
EU808765.1.1338	B1469_Methylomonas	29	0.00052427	0.128419	0.76908	#N/A	Peripheral	Bacteria	Proteobacteria	Gammaproteobacteria	Methylococcales	Methylomonaceae	Methylomonas	#N/A
f0aeff0c8b10a931bf2c1ef505074e9e	B3997_uncultured Conexibacteraceae bacterium	29	2.3684e-06	0.366231	-0.418169	#N/A	Peripheral	Bacteria	Actinobacteria	Thermoleophilia	Gaiellales	uncultured	uncultured Conexibacteraceae bacterium	uncultured Conexibacteraceae bacterium
FJ621550.1.1302	B1368_Sh765B-TzT-35	29	2.43415e-07	1.11022e-16	-0.0472649	#N/A	Peripheral	Bacteria	Rokubacteria	NC10	Methylomirabilales	Methylomirabilaceae	Sh765B-TzT-35	NC10 bacterium enrichment culture clone Ino-F12
HM248231.1.1366	B6473_Solirubrobacter	29	1.8387e-06	0.285375	-0.361227	#N/A	Peripheral	Bacteria	Actinobacteria	Thermoleophilia	Solirubrobacterales	Solirubrobacteraceae	Solirubrobacter	uncultured Solirubrobacter sp.
JN003081.1.1258	B3618_Chthoniobacter	29	2.45747e-06	1.11022e-16	0.0114313	#N/A	Peripheral	Bacteria	Verrucomicrobia	Verrucomicrobiae	Chthoniobacterales	Chthoniobacteraceae	Chthoniobacter	#N/A
KP728227.1.1516	B5550_f_0319-6G20	29	5.61328e-07	1.11022e-16	-0.0472649	#N/A	Peripheral	Bacteria	Proteobacteria	Deltaproteobacteria	Oligoflexales	0319-6G20	#N/A	#N/A
KR779707.1.1373	B3490_uncultured Desulfuromonadales bacterium	29	3.14764e-06	1.11022e-16	0.0114313	#N/A	Peripheral	Bacteria	Proteobacteria	Deltaproteobacteria	RCP2-54	uncultured Desulfuromonadales bacterium	uncultured Desulfuromonadales bacterium	uncultured Desulfuromonadales bacterium
05ac133fb9b802cb5111b6142098ab00	F413_o_NA	29	0.00127651	1.11022e-16	0.937089	#N/A	Peripheral	Fungi	#N/A	#N/A	#N/A	#N/A	#N/A	#N/A
4e4552870ee9f8ba353228d019319cef	F296_unidentified	29	0.000956646	0.128419	0.76908	#N/A	Peripheral	Fungi	unidentified	unidentified	unidentified	unidentified	unidentified	unidentified
93c5531b65b885f230072aa18618cc7c	F5378_unidentified	29	1.63975e-05	0.0665874	-0.340996	#N/A	Peripheral	Fungi	unidentified	unidentified	unidentified	unidentified	unidentified	unidentified
e22827628c1ec69915f2d2aa63c65d9b	F1008_o_NA	29	0.000269844	1.11022e-16	0.937089	#N/A	Peripheral	Fungi	#N/A	#N/A	#N/A	#N/A	#N/A	#N/A
f12542c9f7ceaeb76176af5e51459196	F4285_unidentified	29	9.43478e-07	0.128419	-0.305741	#N/A	Peripheral	Fungi	unidentified	unidentified	unidentified	unidentified	unidentified	unidentified
SH176293.07FU_FJ613038_reps	F129_Trichoderma	29	2.23384e-06	0.0665874	0.0768956	#N/A	Peripheral	Fungi	Ascomycota	Sordariomycetes	Hypocreales	Hypocreaceae	Trichoderma	#N/A
059383b38d87f5df8d77068117b78455	B4337_f_uncultured	28	1.32709e-07	0.0688776	-0.305741	#N/A	Peripheral	Bacteria	Proteobacteria	Alphaproteobacteria	Elsterales	uncultured	#N/A	#N/A
45a748df4356242afe652996a4abb08f	B1634_Desulfomonile	28	1.9744e-06	1.11022e-16	-0.340996	#N/A	Peripheral	Bacteria	Proteobacteria	Deltaproteobacteria	Syntrophobacterales	Syntrophaceae	Desulfomonile	#N/A
59a8b2553dd8dd353a1226192d190837	B8375_o_OPB41	28	2.77005e-06	1.11022e-16	-0.340996	#N/A	Peripheral	Bacteria	Actinobacteria	Coriobacteriia	OPB41	#N/A	#N/A	#N/A
AB240347.1.1464	B363_uncultured bacterium	28	0.000290111	0.0688776	0.76908	#N/A	Peripheral	Bacteria	Chloroflexi	Anaerolineae	SBR1031	uncultured bacterium	uncultured bacterium	uncultured bacterium
AB240523.1.1518	B6681_f_0319-6G20	28	5.69115e-07	1.11022e-16	-0.0667637	#N/A	Peripheral	Bacteria	Proteobacteria	Deltaproteobacteria	Oligoflexales	0319-6G20	#N/A	#N/A
AY947996.1.1387	B1378_Rhodobacter	28	0.00291643	1.11022e-16	0.853084	#N/A	Peripheral	Bacteria	Proteobacteria	Alphaproteobacteria	Rhodobacterales	Rhodobacteraceae	Rhodobacter	Rhodobacter sp. 7B-409
ccc4dfbed9e52f03cb60a772576b7340	B9788_f_uncultured	28	1.16554e-07	0.293367	-0.389698	#N/A	Peripheral	Bacteria	Proteobacteria	Alphaproteobacteria	Elsterales	uncultured	#N/A	#N/A
FJ538116.1.1410	B1043_uncultured proteobacterium	28	4.96414e-06	1.11022e-16	-0.0801543	#N/A	Peripheral	Bacteria	Proteobacteria	Deltaproteobacteria	MBNT15	uncultured proteobacterium	uncultured proteobacterium	uncultured proteobacterium
FM866305.1.1466	B534_uncultured bacterium	28	0.000485308	1.11022e-16	0.853084	#N/A	Peripheral	Bacteria	Armatimonadetes	Chthonomonadetes	Chthonomonadales	uncultured bacterium	uncultured bacterium	uncultured bacterium
FPLM01000410.1.1347	B447_wastewater metagenome	28	0.00473656	0.135204	0.685076	#N/A	Peripheral	Bacteria	Chloroflexi	Anaerolineae	SBR1031	A4b	wastewater metagenome	wastewater metagenome
GQ354917.1.1471	B1683_uncultured	28	0.000995304	1.11022e-16	0.853084	#N/A	Peripheral	Bacteria	Chloroflexi	Anaerolineae	Anaerolineales	Anaerolineaceae	uncultured	#N/A
HQ114157.1.1496	B123_Ellin6067	28	0.00175782	0.135204	0.685076	#N/A	Peripheral	Bacteria	Proteobacteria	Gammaproteobacteria	Betaproteobacteriales	Nitrosomonadaceae	Ellin6067	#N/A
HQ597068.1.1509	B608_uncultured Acidobacteriales bacterium	28	0.000897055	0.0688776	0.76908	#N/A	Peripheral	Bacteria	Acidobacteria	Blastocatellia (Subgroup 4)	11-24	uncultured Acidobacteriales bacterium	uncultured Acidobacteriales bacterium	uncultured Acidobacteriales bacterium
JX505016.1.1422	B35_uncultured Anaerolineaceae bacterium	28	0.0021336	0.0688776	0.76908	#N/A	Peripheral	Bacteria	Chloroflexi	KD4-96	uncultured Anaerolineaceae bacterium	uncultured Anaerolineaceae bacterium	uncultured Anaerolineaceae bacterium	uncultured Anaerolineaceae bacterium
KJ615254.1.1298	B10667_o_NA	28	3.47068e-06	1.11022e-16	0.00477174	#N/A	Peripheral	Bacteria	Proteobacteria	Alphaproteobacteria	#N/A	#N/A	#N/A	#N/A
KM410437.1.1389	B55_Thiobacillus	28	2.80185e-06	1.11022e-16	-0.0801543	#N/A	Peripheral	Bacteria	Proteobacteria	Gammaproteobacteria	Betaproteobacteriales	Hydrogenophilaceae	Thiobacillus	#N/A
KP201099.1.1211	B319_Pseudomonas	28	0.00145667	1.11022e-16	0.853084	#N/A	Peripheral	Bacteria	Proteobacteria	Gammaproteobacteria	Pseudomonadales	Pseudomonadaceae	Pseudomonas	#N/A
LM655338.1.1488	B3905_Mesorhizobium	28	1.40123e-06	1.11022e-16	0.0542386	#N/A	Peripheral	Bacteria	Proteobacteria	Alphaproteobacteria	Rhizobiales	Rhizobiaceae	Mesorhizobium	#N/A
LN555032.1.1217	B1202_o_NA	28	0.00221527	1.11022e-16	0.853084	#N/A	Peripheral	Bacteria	Acidobacteria	Subgroup 6	#N/A	#N/A	#N/A	#N/A
SH198119.07FU_DQ420916_reps	F76_f_Hyaloscyphaceae	28	0.00122416	1.11022e-16	0.853084	#N/A	Peripheral	Fungi	Ascomycota	Leotiomycetes	Helotiales	Hyaloscyphaceae	#N/A	#N/A
SH237620.07FU_GU981612_refs	F1428_Penicillium	28	8.74008e-06	0.0688776	-0.0591446	#N/A	Peripheral	Fungi	Ascomycota	Eurotiomycetes	Eurotiales	Aspergillaceae	Penicillium	unidentified
SH446992.07FU_KC254054_refs	F381_Fusarium	28	0.00427382	0.0688776	0.76908	#N/A	Peripheral	Fungi	Ascomycota	Sordariomycetes	Hypocreales	Nectriaceae	Fusarium	Fusarium_sporotrichioides
2516faed48512a48589915f9780b2d66	A982_uncultured archaeon	27	1.00524e-06	1.11022e-16	-0.0591446	#N/A	Peripheral	Archaea	Nanoarchaeaeota	Woesearchaeia	uncultured archaeon	uncultured archaeon	uncultured archaeon	uncultured archaeon
1bcb149e2acea10ab5903f151e2966ba	B4737_f_WD2101 soil group	27	6.60707e-08	0.197531	-0.361227	#N/A	Peripheral	Bacteria	Planctomycetes	Phycisphaerae	Tepidisphaerales	WD2101 soil group	#N/A	#N/A
a70f1bea3b867e27871a48c8a4f00fdb	B5151_uncultured Acidobacterium sp.	27	5.21605e-07	1.11022e-16	0.0152741	#N/A	Peripheral	Bacteria	Latescibacteria	uncultured Acidobacterium sp.	uncultured Acidobacterium sp.	uncultured Acidobacterium sp.	uncultured Acidobacterium sp.	uncultured Acidobacterium sp.
AB364744.1.1490	B560_uncultured	27	0.000847818	0.466392	-0.070964	#N/A	Peripheral	Bacteria	Proteobacteria	Deltaproteobacteria	Syntrophobacterales	Syntrophaceae	uncultured	uncultured delta proteobacterium
EF019400.1.1336	B519_uncultured	27	1.97841e-06	1.11022e-16	0.0152741	#N/A	Peripheral	Bacteria	Proteobacteria	Alphaproteobacteria	Sphingomonadales	Sphingomonadaceae	uncultured	Sphingosinicella sp.
EF127608.1.1390	B270_Sphingomonas	27	0.00381268	0.139918	0.601071	#N/A	Peripheral	Bacteria	Proteobacteria	Alphaproteobacteria	Sphingomonadales	Sphingomonadaceae	Sphingomonas	#N/A
EF515929.1.1461	B483_o_Subgroup 7	27	0.000839444	1.11022e-16	0.76908	#N/A	Peripheral	Bacteria	Acidobacteria	Holophagae	Subgroup 7	#N/A	#N/A	#N/A
EU193073.1.1508	B2193_uncultured Polyangiaceae bacterium	27	2.55243e-06	1.11022e-16	0.0152741	#N/A	Peripheral	Bacteria	Proteobacteria	Deltaproteobacteria	Myxococcales	mle1-27	uncultured Polyangiaceae bacterium	uncultured Polyangiaceae bacterium
FJ037640.1.1497	B3378_Gallionella	27	7.00261e-07	1.11022e-16	0.0152741	#N/A	Peripheral	Bacteria	Proteobacteria	Gammaproteobacteria	Betaproteobacteriales	Gallionellaceae	Gallionella	#N/A
GQ397052.1.1443	B789_uncultured	27	0.00151911	0.466392	-0.070964	#N/A	Peripheral	Bacteria	Chloroflexi	Chloroflexia	Chloroflexales	Roseiflexaceae	uncultured	uncultured Chloroflexaceae bacterium
HQ003656.1.1490	B4694_uncultured Nitrospirae bacterium	27	1.37506e-05	1.11022e-16	-0.113044	#N/A	Peripheral	Bacteria	Nitrospirae	Thermodesulfovibrionia	uncultured	uncultured Nitrospirae bacterium	uncultured Nitrospirae bacterium	uncultured Nitrospirae bacterium
JF342354.1.1491	B18_f_Intrasporangiaceae	27	0.00112153	1.11022e-16	0.76908	#N/A	Peripheral	Bacteria	Actinobacteria	Actinobacteria	Micrococcales	Intrasporangiaceae	#N/A	#N/A
KC554716.1.1561	B4680_metagenome	27	3.94737e-07	1.11022e-16	-0.0988533	#N/A	Peripheral	Bacteria	Actinobacteria	Acidimicrobiia	Microtrichales	uncultured	metagenome	metagenome
KY190476.1.1480	B227_Pajaroellobacter	27	0.00324908	0.0713306	0.685076	#N/A	Peripheral	Bacteria	Proteobacteria	Deltaproteobacteria	Myxococcales	Polyangiaceae	Pajaroellobacter	uncultured Chondromyces sp.
43ed6506996fbfc82a101c6b8431a9c1	F2207_unidentified	27	0.00196292	0.0713306	0.685076	#N/A	Peripheral	Fungi	unidentified	unidentified	unidentified	unidentified	unidentified	unidentified
5e64179506ada14c8f37c251e8ef6a03	F4782_o_NA	27	1.35954e-07	0.252401	-0.389698	#N/A	Peripheral	Fungi	#N/A	#N/A	#N/A	#N/A	#N/A	#N/A
8452416cdc480bfa48d474587b104351	F3658_o_NA	27	6.59725e-07	1.11022e-16	-0.113044	#N/A	Peripheral	Fungi	#N/A	#N/A	#N/A	#N/A	#N/A	#N/A
SH186934.07FU_KJ939279_reps	F1039_Paraphaeosphaeria	27	7.1391e-07	1.11022e-16	0.0152741	#N/A	Peripheral	Fungi	Ascomycota	Dothideomycetes	Pleosporales	Didymosphaeriaceae	Paraphaeosphaeria	Paraphaeosphaeria_michotii
f1ff381cdbc2db07c68262479a086fcd	A1037_uncultured euryarchaeote	26	3.42113e-07	0	-0.145933	#N/A	Peripheral	Archaea	Nanoarchaeaeota	Woesearchaeia	uncultured euryarchaeote	uncultured euryarchaeote	uncultured euryarchaeote	uncultured euryarchaeote
21ba7a86fc170a1fea2c006a045ca623	B8417_o_NA	26	1.78379e-05	0	-0.0673346	#N/A	Peripheral	Bacteria	Nitrospinae	P9X2b3D02	#N/A	#N/A	#N/A	#N/A
2dd8478ac1cccf01ab08a4f277618821	B1764_uncultured	26	5.13686e-07	0.310651	-0.44664	#N/A	Peripheral	Bacteria	Chloroflexi	Anaerolineae	Anaerolineales	Anaerolineaceae	uncultured	uncultured Anaerolineaceae bacterium
660b7d78d8eda2976eced89d4463bce8	B9847_o_Myxococcales	26	3.33799e-06	0.0739645	-0.426971	#N/A	Peripheral	Bacteria	Proteobacteria	Deltaproteobacteria	Myxococcales	#N/A	#N/A	#N/A
6ca8639bfa902997f21024910a05550e	B9848_uncultured prokaryote	26	1.21178e-07	0.260355	-0.418169	#N/A	Peripheral	Bacteria	Acidobacteria	Subgroup 6	uncultured prokaryote	uncultured prokaryote	uncultured prokaryote	uncultured prokaryote
70ccf3b52cdc23a22a248c3ae8c9e30e	B6295_Subgroup 10	26	2.3733e-07	0.0739645	-0.041261	#N/A	Peripheral	Bacteria	Acidobacteria	Thermoanaerobaculia	Thermoanaerobaculales	Thermoanaerobaculaceae	Subgroup 10	#N/A
AB630467.1.1467	B739_uncultured bacterium	26	0.000322289	0.210059	0.433062	#N/A	Peripheral	Bacteria	Proteobacteria	Gammaproteobacteria	MBMPE27	uncultured bacterium	uncultured bacterium	uncultured bacterium
d778f48476ec7498fe38b54dc941d5d4	B8964_Hydrogenispora	26	1.40507e-06	0	-0.398312	#N/A	Peripheral	Bacteria	Firmicutes	Clostridia	Clostridiales	Heliobacteriaceae	Hydrogenispora	uncultured Firmicutes bacterium
EF019280.1.1362	B2899_f_TRA3-20	26	5.57312e-08	0.204142	-0.389698	#N/A	Peripheral	Bacteria	Proteobacteria	Gammaproteobacteria	Betaproteobacteriales	TRA3-20	#N/A	#N/A
EU589264.1.1472	B755_AKIW659	26	6.91171e-07	0	-0.398312	#N/A	Peripheral	Bacteria	Acidobacteria	Acidobacteriia	Solibacterales	Solibacteraceae (Subgroup 3)	AKIW659	uncultured soil bacterium
f9352704f81bda6d64a7470135c5f1fc	B5221_o_S085	26	1.90292e-06	0	-0.0944326	#N/A	Peripheral	Bacteria	Chloroflexi	Dehalococcoidia	S085	#N/A	#N/A	#N/A
FM201060.1.1322	B1505_uncultured	26	6.30007e-07	0	-0.0236904	#N/A	Peripheral	Bacteria	Proteobacteria	Alphaproteobacteria	Micropepsales	Micropepsaceae	uncultured	#N/A
FPLS01055778.11.1353	B1286_Dokdonella	26	0.00109125	0	0.685076	#N/A	Peripheral	Bacteria	Proteobacteria	Gammaproteobacteria	Xanthomonadales	Rhodanobacteraceae	Dokdonella	#N/A
GQ261289.1.1467	B7069_uncultured	26	2.42637e-07	0	-0.0944326	#N/A	Peripheral	Bacteria	Chloroflexi	Anaerolineae	Anaerolineales	Anaerolineaceae	uncultured	uncultured prokaryote
GU127037.1.1217	B230_uncultured bacterium mle1-16	26	0.000602321	0	0.685076	#N/A	Peripheral	Bacteria	Latescibacteria	uncultured bacterium mle1-16	uncultured bacterium mle1-16	uncultured bacterium mle1-16	uncultured bacterium mle1-16	uncultured bacterium mle1-16
HM341137.1.1357	B274_Ferruginibacter	26	0.00237955	0.14497	0.517067	#N/A	Peripheral	Bacteria	Bacteroidetes	Bacteroidia	Chitinophagales	Chitinophagaceae	Ferruginibacter	uncultured Ferruginibacter sp.
JN379390.1.1474	B4869_Clostridium sensu stricto 10	26	4.10399e-07	0.310651	-0.44664	#N/A	Peripheral	Bacteria	Firmicutes	Clostridia	Clostridiales	Clostridiaceae 1	Clostridium sensu stricto 10	#N/A
1eb4474abbe2b37d01141585ac3b6823	F3149_o_NA	26	0.000114159	0.142012	-0.0806466	#N/A	Peripheral	Fungi	#N/A	#N/A	#N/A	#N/A	#N/A	#N/A
7cf33bbee3623db7007f48273ec52a7d	F1113_unidentified	26	0.00208273	0.14497	0.517067	#N/A	Peripheral	Fungi	unidentified	unidentified	unidentified	unidentified	unidentified	unidentified
91efd69a2d20ae9f7af1d112b029eb26	F180_unidentified	26	0.0104802	0.14497	0.517067	#N/A	Peripheral	Fungi	Basidiomycota	Agaricomycetes	Cantharellales	Ceratobasidiaceae	unidentified	unidentified
SH181635.07FU_HQ623619_reps	F2910_Vishniacozyma	26	3.15651e-06	0	-0.145933	#N/A	Peripheral	Fungi	Basidiomycota	Tremellomycetes	Tremellales	Bulleribasidiaceae	Vishniacozyma	#N/A
SH188268.07FU_AM269789_reps	F635_unidentified	26	0.000958177	0	0.685076	#N/A	Peripheral	Fungi	Basidiomycota	Agaricomycetes	Polyporales	unidentified	unidentified	unidentified
EF022239.1.901	A16_Candidatus Nitrocosmicus	25	0.00170745	0	0.601071	#N/A	Peripheral	Archaea	Thaumarchaeota	Nitrososphaeria	Nitrososphaerales	Nitrososphaeraceae	Candidatus Nitrocosmicus	#N/A
AM935281.1.1389	B8149_uncultured Pedosphaera sp.	25	7.71249e-08	0.2688	-0.44664	#N/A	Peripheral	Bacteria	Verrucomicrobia	Verrucomicrobiae	Pedosphaerales	Pedosphaeraceae	uncultured Pedosphaera sp.	uncultured Pedosphaera sp.
AY102345.1.1331	B6597_uncultured	25	5.55342e-07	0.0768	-0.0806466	#N/A	Peripheral	Bacteria	Gemmatimonadetes	Gemmatimonadetes	Gemmatimonadales	Gemmatimonadaceae	uncultured	uncultured Nitrospira sp.
AY118151.1.1480	B153_uncultured bacterium	25	0.000802751	0	0.601071	#N/A	Peripheral	Bacteria	Bacteroidetes	Ignavibacteria	SJA-28	uncultured bacterium	uncultured bacterium	uncultured bacterium
FJ889256.1.1475	B226_metagenome	25	0.001228	0	0.601071	#N/A	Peripheral	Bacteria	Actinobacteria	Acidimicrobiia	Microtrichales	metagenome	metagenome	metagenome
FPLL01001434.17.1517	B4485_uncultured	25	1.9e-07	0.2688	-0.44664	#N/A	Peripheral	Bacteria	Planctomycetes	Planctomycetacia	Pirellulales	Pirellulaceae	uncultured	uncultured Planctomycetaceae bacterium
HQ119622.1.1485	B541_Chthonomonas	25	0.000822815	0.0768	0.517067	#N/A	Peripheral	Bacteria	Armatimonadetes	Chthonomonadetes	Chthonomonadales	Chthonomonadaceae	Chthonomonas	uncultured bacterium
HQ602802.1.1451	B177_Desulfobacca	25	0.00190332	0	0.601071	#N/A	Peripheral	Bacteria	Proteobacteria	Deltaproteobacteria	Syntrophobacterales	Syntrophaceae	Desulfobacca	#N/A
JN003107.1.1246	B3132_Haliangium	25	7.82443e-08	0.0768	-0.361227	#N/A	Peripheral	Bacteria	Proteobacteria	Deltaproteobacteria	Myxococcales	Haliangiaceae	Haliangium	uncultured proteobacterium
JN417584.1.1525	B324_f_SC-I-84	25	0.00132688	0	0.601071	#N/A	Peripheral	Bacteria	Proteobacteria	Gammaproteobacteria	Betaproteobacteriales	SC-I-84	#N/A	#N/A
e77863a1b944736002c770deefa173ca	A166_uncultured euryarchaeote	24	0.000922531	0.21875	0.265054	#N/A	Peripheral	Archaea	Nanoarchaeaeota	Woesearchaeia	uncultured euryarchaeote	uncultured euryarchaeote	uncultured euryarchaeote	uncultured euryarchaeote
6ab111bce602802f9f9e362e4184fd1e	B2911_o_NA	24	4.46548e-07	0	-0.165009	#N/A	Peripheral	Bacteria	Nitrospinae	P9X2b3D02	#N/A	#N/A	#N/A	#N/A
deea04a76212dd1b80a1f5578916b6c6	B1873_o_NA	24	1.52817e-06	0	-0.139441	#N/A	Peripheral	Bacteria	Latescibacteria	#N/A	#N/A	#N/A	#N/A	#N/A
f8d5d3db75c7b054500b0b60f7f01044	B1773_uncultured	24	1.02461e-07	0	-0.195122	#N/A	Peripheral	Bacteria	Proteobacteria	Gammaproteobacteria	Xanthomonadales	Xanthomonadaceae	uncultured	uncultured Xanthomonadaceae bacterium
FJ719036.1.1411	B1330_f_Sphingomonadaceae	24	0.00105014	0	0.517067	#N/A	Peripheral	Bacteria	Proteobacteria	Alphaproteobacteria	Sphingomonadales	Sphingomonadaceae	#N/A	#N/A
FQ659333.1.1322	B987_Leptolinea	24	0.00162276	0	0.517067	#N/A	Peripheral	Bacteria	Chloroflexi	Anaerolineae	Anaerolineales	Anaerolineaceae	Leptolinea	uncultured soil bacterium
HM141888.1.1474	B2239_o_OPB41	24	9.1429e-06	0.0798611	-0.227212	#N/A	Peripheral	Bacteria	Actinobacteria	Coriobacteriia	OPB41	#N/A	#N/A	#N/A
JF139635.1.1337	B426_Kineosporia	24	0.000800293	0	0.517067	#N/A	Peripheral	Bacteria	Actinobacteria	Actinobacteria	Kineosporiales	Kineosporiaceae	Kineosporia	#N/A
JF144377.1.1358	B1431_uncultured Planctomyces sp.	24	0.000357273	0.152778	0.349058	#N/A	Peripheral	Bacteria	Planctomycetes	Planctomycetacia	Planctomycetales	uncultured	uncultured Planctomyces sp.	uncultured Planctomyces sp.
JN397968.1.1431	B255_uncultured	24	0.00236312	0.0798611	0.433062	#N/A	Peripheral	Bacteria	Chloroflexi	Anaerolineae	Anaerolineales	Anaerolineaceae	uncultured	#N/A
JQ427844.1.1508	B2913_f_BIrii41	24	1.74498e-07	0	-0.211712	#N/A	Peripheral	Bacteria	Proteobacteria	Deltaproteobacteria	Myxococcales	BIrii41	#N/A	#N/A
JX222430.1.1361	B10079_uncultured Lutispora sp.	24	6.27998e-07	0.329861	-0.503582	#N/A	Peripheral	Bacteria	Armatimonadetes	Chthonomonadetes	Chthonomonadales	uncultured Lutispora sp.	uncultured Lutispora sp.	uncultured Lutispora sp.
JX223258.1.1478	B8470_Haliangium	24	1.95752e-08	0.277778	-0.475111	#N/A	Peripheral	Bacteria	Proteobacteria	Deltaproteobacteria	Myxococcales	Haliangiaceae	Haliangium	#N/A
SH180502.07FU_HQ591444_reps	F680_Hannaella	24	0.00350299	0.225694	0.265054	#N/A	Peripheral	Fungi	Basidiomycota	Tremellomycetes	Tremellales	Bulleribasidiaceae	Hannaella	#N/A
SH195224.07FU_HQ212329_reps	F151_o_Helotiales	24	0.00266332	0.0798611	0.433062	#N/A	Peripheral	Fungi	Ascomycota	Leotiomycetes	Helotiales	#N/A	#N/A	#N/A
fbdaedbf0a13eed4a795ff2f9efe9d55	A760_o_NA	23	5.68231e-07	0	-0.244601	#N/A	Peripheral	Archaea	Nanoarchaeaeota	Woesearchaeia	#N/A	#N/A	#N/A	#N/A
KJ566513.1.955	A255_uncultured euryarchaeote	23	0.00137699	0.15879	0.265054	#N/A	Peripheral	Archaea	Nanoarchaeaeota	Woesearchaeia	uncultured euryarchaeote	uncultured euryarchaeote	uncultured euryarchaeote	uncultured euryarchaeote
096e6764315d66cd2720cc8987667ab4	B3342_f_Pedosphaeraceae	23	5.85172e-09	0.0831758	-0.446272	#N/A	Peripheral	Bacteria	Verrucomicrobia	Verrucomicrobiae	Pedosphaerales	Pedosphaeraceae	#N/A	#N/A
3bbdf470298a99e3b88e43a416e0ad0b	B330_uncultured Gemmatimonadetes bacterium	23	0.000272023	0	0.433062	#N/A	Peripheral	Bacteria	Chloroflexi	Anaerolineae	SBR1031	uncultured Gemmatimonadetes bacterium	uncultured Gemmatimonadetes bacterium	uncultured Gemmatimonadetes bacterium
938cb3482a9345a520c4862e166658f2	B3538_uncultured soil bacterium	23	7.09152e-06	0.0831758	-0.235584	#N/A	Peripheral	Bacteria	Planctomycetes	Phycisphaerae	Tepidisphaerales	WD2101 soil group	uncultured soil bacterium	uncultured soil bacterium
AB487539.1.1349	B911_Hydrogenispora	23	0.00688628	0.162571	0.265054	#N/A	Peripheral	Bacteria	Firmicutes	Clostridia	Clostridiales	Heliobacteriaceae	Hydrogenispora	#N/A
b9793fc6705b937b6e9a3bb081b480e8	B3418_o_Chthonomonadales	23	4.08169e-07	0	-0.227212	#N/A	Peripheral	Bacteria	Armatimonadetes	Chthonomonadetes	Chthonomonadales	#N/A	#N/A	#N/A
EF516751.1.1474	B8014_Pajaroellobacter	23	6.48057e-08	0.0831758	-0.159418	#N/A	Peripheral	Bacteria	Proteobacteria	Deltaproteobacteria	Myxococcales	Polyangiaceae	Pajaroellobacter	#N/A
FPLM01006277.2.1421	B1234_Syntrophus	23	7.4814e-07	0.0831758	-0.512945	#N/A	Peripheral	Bacteria	Proteobacteria	Deltaproteobacteria	Syntrophobacterales	Syntrophaceae	Syntrophus	#N/A
FPLS01058252.1.1411	B81_Pajaroellobacter	23	0.0014027	0.0831758	0.349058	#N/A	Peripheral	Bacteria	Proteobacteria	Deltaproteobacteria	Myxococcales	Polyangiaceae	Pajaroellobacter	uncultured Chondromyces sp.
HQ462474.1.1271	B600_uncultured	23	0.000216011	0.226843	0.181049	#N/A	Peripheral	Bacteria	Actinobacteria	Acidimicrobiia	Microtrichales	Ilumatobacteraceae	uncultured	uncultured Acidimicrobiales bacterium
JF833572.1.1437	B756_f_A21b	23	0.000276115	0.0831758	0.349058	#N/A	Peripheral	Bacteria	Proteobacteria	Gammaproteobacteria	Betaproteobacteriales	A21b	#N/A	#N/A
KF956760.1.1483	B1721_uncultured prokaryote	23	6.5281e-07	0	-0.227212	#N/A	Peripheral	Bacteria	Nitrospinae	P9X2b3D02	uncultured prokaryote	uncultured prokaryote	uncultured prokaryote	uncultured prokaryote
05e20932b350502bb5196f18969f42a0	F751_o_NA	23	0.000630043	0	0.433062	#N/A	Peripheral	Fungi	#N/A	#N/A	#N/A	#N/A	#N/A	#N/A
b86e2285c1f37210e234a42a25142f0b	F3833_o_NA	23	8.64276e-06	0.0831758	-0.211547	#N/A	Peripheral	Fungi	Basidiomycota	#N/A	#N/A	#N/A	#N/A	#N/A
DQ837283.1.1296	A49_o_NA	22	0.00147689	0	0.349058	#N/A	Peripheral	Archaea	Thaumarchaeota	#N/A	#N/A	#N/A	#N/A	#N/A
3649423984dd005e3913d7ce50b4f707	B683_uncultured bacterium	22	0.000674898	0	0.349058	#N/A	Peripheral	Bacteria	Chloroflexi	Dehalococcoidia	S085	uncultured bacterium	uncultured bacterium	uncultured bacterium
8b8a09db1b7372916b979554b7c5e69e	B7367_o_1013-28-CG33	22	8.08095e-09	0.297521	-0.532053	#N/A	Peripheral	Bacteria	Proteobacteria	Gammaproteobacteria	1013-28-CG33	#N/A	#N/A	#N/A
AB307638.1.1387	B2213_Ruminiclostridium 1	22	0.000376623	0.0867769	-0.218513	#N/A	Peripheral	Bacteria	Firmicutes	Clostridia	Clostridiales	Ruminococcaceae	Ruminiclostridium 1	#N/A
AM295534.1.1231	B536_mle1-7	22	8.39234e-08	0.235537	-0.503582	#N/A	Peripheral	Bacteria	Proteobacteria	Gammaproteobacteria	Betaproteobacteriales	Nitrosomonadaceae	mle1-7	uncultured beta proteobacterium
b28b22585e5563e9a2ccdb9a6c6f3f26	B4273_uncultured Anaerolineaceae bacterium	22	5.65599e-08	0.235537	-0.503582	#N/A	Peripheral	Bacteria	Chloroflexi	Anaerolineae	RBG-13-54-9	uncultured Anaerolineaceae bacterium	uncultured Anaerolineaceae bacterium	uncultured Anaerolineaceae bacterium
DQ462656.1.1405	B8735_Streptomyces	22	0	0	-0.259301	#N/A	Peripheral	Bacteria	Actinobacteria	Actinobacteria	Streptomycetales	Streptomycetaceae	Streptomyces	#N/A
EF018110.1.1322	B630_Candidatus Solibacter	22	0.000534649	0	0.349058	#N/A	Peripheral	Bacteria	Acidobacteria	Acidobacteriia	Solibacterales	Solibacteraceae (Subgroup 3)	Candidatus Solibacter	uncultured proteobacterium
EF018792.1.1334	B197_uncultured proteobacterium	22	0.000269687	0.0867769	0.265054	#N/A	Peripheral	Bacteria	Proteobacteria	Alphaproteobacteria	Micropepsales	Micropepsaceae	uncultured proteobacterium	uncultured proteobacterium
EF103211.1.1400	B328_Pedobacter	22	0.00142483	0	0.349058	#N/A	Peripheral	Bacteria	Bacteroidetes	Bacteroidia	Sphingobacteriales	Sphingobacteriaceae	Pedobacter	Pedobacter sp. MSCB-14
EF516588.1.1452	B61_Ellin6067	22	0.00537029	0.243802	0.0970448	#N/A	Peripheral	Bacteria	Proteobacteria	Gammaproteobacteria	Betaproteobacteriales	Nitrosomonadaceae	Ellin6067	#N/A
EU431696.1.1505	B521_Arenimonas	22	0.00093567	0	0.349058	#N/A	Peripheral	Bacteria	Proteobacteria	Gammaproteobacteria	Xanthomonadales	Xanthomonadaceae	Arenimonas	Arenimonas daechungensis
FJ538129.1.1505	B191_MND1	22	1.83035e-07	0	-0.277491	#N/A	Peripheral	Bacteria	Proteobacteria	Gammaproteobacteria	Betaproteobacteriales	Nitrosomonadaceae	MND1	uncultured Rhodocyclaceae bacterium
FPLL01003168.16.1552	B571_uncultured	22	0.000904383	0	0.349058	#N/A	Peripheral	Bacteria	Proteobacteria	Deltaproteobacteria	Myxococcales	Sandaracinaceae	uncultured	uncultured soil bacterium
FPLS01015572.10.1517	B3430_Conexibacter	22	3.62536e-07	0	-0.512945	#N/A	Peripheral	Bacteria	Actinobacteria	Thermoleophilia	Solirubrobacterales	Solirubrobacteraceae	Conexibacter	metagenome
HM185964.1.1386	B2226_o_NA	22	1.26383e-07	0.0867769	-0.198803	#N/A	Peripheral	Bacteria	Acidobacteria	Subgroup 17	#N/A	#N/A	#N/A	#N/A
HQ397524.1.1516	B1758_f_Archangiaceae	22	4.70769e-07	0.0867769	-0.198803	#N/A	Peripheral	Bacteria	Proteobacteria	Deltaproteobacteria	Myxococcales	Archangiaceae	#N/A	#N/A
HQ462550.1.1241	B39_f_Burkholderiaceae	22	0.00128488	0.35124	-0.070964	#N/A	Peripheral	Bacteria	Proteobacteria	Gammaproteobacteria	Betaproteobacteriales	Burkholderiaceae	#N/A	#N/A
JN869091.1.1482	B371_uncultured	22	0.00100618	0.169421	0.181049	#N/A	Peripheral	Bacteria	Proteobacteria	Alphaproteobacteria	Rhizobiales	Rhizobiales Incertae Sedis	uncultured	#N/A
KM200750.1.1512	B3811_Acidobacteria bacterium SCN 69-37	22	2.77326e-07	0	-0.277491	#N/A	Peripheral	Bacteria	Acidobacteria	Subgroup 6	Acidobacteria bacterium SCN 69-37	Acidobacteria bacterium SCN 69-37	Acidobacteria bacterium SCN 69-37	Acidobacteria bacterium SCN 69-37
LN563859.1.1371	B2944_uncultured soil bacterium	22	2.01611e-06	0	-0.277491	#N/A	Peripheral	Bacteria	Planctomycetes	Planctomycetacia	Planctomycetales	uncultured	uncultured soil bacterium	uncultured soil bacterium
290407c0218dbd0dfd1fc4f00e09f915	F3407_o_NA	22	0.00011745	0.297521	0.0130404	#N/A	Peripheral	Fungi	Ascomycota	Leotiomycetes	#N/A	#N/A	#N/A	#N/A
8a51bcc67a7bc7514e519c8461a8ec3d	F5_Schizothecium	22	0.00188818	0.165289	0.181049	#N/A	Peripheral	Fungi	Ascomycota	Sordariomycetes	Sordariales	Lasiosphaeriaceae	Schizothecium	#N/A
e5e679b38a0c95c2ad07de4454371477	F3482_o_NA	22	1.65101e-07	0.0867769	-0.198803	#N/A	Peripheral	Fungi	#N/A	#N/A	#N/A	#N/A	#N/A	#N/A
SH123240.07FU_HQ880800_refs	F2193_Beauveria	22	1.19679e-06	0.0867769	-0.541603	#N/A	Peripheral	Fungi	Ascomycota	Sordariomycetes	Hypocreales	Cordycipitaceae	Beauveria	#N/A
SH289315.07FU_AF444534_refs	F491_Sampaiozyma	22	0.0002679	0	0.349058	#N/A	Peripheral	Fungi	Basidiomycota	Microbotryomycetes	Microbotryomycetes_ord_Incertae_sedis	Chrysozymaceae	Sampaiozyma	Sampaiozyma_ingeniosa
07270759c1c4dcaaf54257d809754ef9	B4313_Defluviicoccus	21	6.60835e-07	0	-0.2476	#N/A	Peripheral	Bacteria	Proteobacteria	Alphaproteobacteria	Rhodospirillales	Rhodopirillaceae	Defluviicoccus	uncultured organism
24b526a823e94b546d3a3a93fe49d3d5	B6585_Defluviicoccus	21	2.00088e-06	0	-0.541603	#N/A	Peripheral	Bacteria	Proteobacteria	Alphaproteobacteria	Rhodospirillales	Rhodopirillaceae	Defluviicoccus	uncultured Defluviicoccus sp.
6c48e0b04cf60bfbeed2e3386a923c31	B6877_anaerobic bacterium MO-CFX2	21	8.34914e-07	0.172336	-0.530591	#N/A	Peripheral	Bacteria	Chloroflexi	Anaerolineae	SBR1031	anaerobic bacterium MO-CFX2	anaerobic bacterium MO-CFX2	anaerobic bacterium MO-CFX2
80dd9a09429948bbe9947a23996afa9f	B473_Leptolinea	21	0.00172737	0	0.265054	#N/A	Peripheral	Bacteria	Chloroflexi	Anaerolineae	Anaerolineales	Anaerolineaceae	Leptolinea	metagenome
AB231940.1.1478	B368_Alsobacter	21	0.000962033	0.176871	0.0970448	#N/A	Peripheral	Bacteria	Proteobacteria	Alphaproteobacteria	Rhizobiales	Rhizobiales Incertae Sedis	Alsobacter	alpha proteobacterium SK200a-2
AB487081.1.1362	B97_Gaiella	21	0.00299021	0	0.265054	#N/A	Peripheral	Bacteria	Actinobacteria	Thermoleophilia	Gaiellales	Gaiellaceae	Gaiella	uncultured Conexibacteraceae bacterium
AB630555.1.1425	B1539_Anaerolinea	21	0.000160096	0.0907029	0.181049	#N/A	Peripheral	Bacteria	Chloroflexi	Anaerolineae	Anaerolineales	Anaerolineaceae	Anaerolinea	uncultured Anaerolineaceae bacterium
EU134013.1.1324	B3437_uncultured bacterium	21	5.79461e-05	0.244898	0.0130404	#N/A	Peripheral	Bacteria	Chloroflexi	Anaerolineae	SBR1031	A4b	uncultured bacterium	uncultured bacterium
EU135578.1.1294	B1299_uncultured soil bacterium	21	0.0013381	0	0.265054	#N/A	Peripheral	Bacteria	Latescibacteria	uncultured soil bacterium	uncultured soil bacterium	uncultured soil bacterium	uncultured soil bacterium	uncultured soil bacterium
FJ006912.1.1406	B187_Terrabacter	21	0.00130507	0.362812	-0.154968	#N/A	Peripheral	Bacteria	Actinobacteria	Actinobacteria	Micrococcales	Intrasporangiaceae	Terrabacter	#N/A
FJ810575.1.1527	B7221_Desulfobacca	21	7.89302e-09	0.0907029	-0.238189	#N/A	Peripheral	Bacteria	Proteobacteria	Deltaproteobacteria	Syntrophobacterales	Syntrophaceae	Desulfobacca	#N/A
FM208262.1.1439	B9176_f_Micromonosporaceae	21	2.03304e-07	0	-0.218513	#N/A	Peripheral	Bacteria	Actinobacteria	Actinobacteria	Micromonosporales	Micromonosporaceae	#N/A	#N/A
FN429806.1.1520	B711_uncultured prokaryote	21	2.52488e-07	0	-0.31038	#N/A	Peripheral	Bacteria	Nitrospinae	P9X2b3D02	uncultured prokaryote	uncultured prokaryote	uncultured prokaryote	uncultured prokaryote
GU359085.1.1439	B570_uncultured Conexibacter sp.	21	8.15062e-08	0	-0.218513	#N/A	Peripheral	Bacteria	Actinobacteria	Thermoleophilia	Gaiellales	uncultured	uncultured Conexibacter sp.	uncultured Conexibacter sp.
HM243897.1.1510	B234_Syntrophorhabdus	21	0.000584228	0.176871	0.0970448	#N/A	Peripheral	Bacteria	Proteobacteria	Deltaproteobacteria	Deltaproteobacteria Incertae Sedis	Syntrophorhabdaceae	Syntrophorhabdus	uncultured Syntrophorhabdaceae bacterium WCHB1-27
HM558334.1.1392	B1282_uncultured	21	0.000377012	0.0907029	0.181049	#N/A	Peripheral	Bacteria	Proteobacteria	Deltaproteobacteria	Desulfarculales	Desulfarculaceae	uncultured	uncultured sludge bacterium H16
HM921105.1.1289	B6173_uncultured soil bacterium	21	2.65791e-07	0	-0.270872	#N/A	Peripheral	Bacteria	Chloroflexi	Anaerolineae	SBR1031	A4b	uncultured soil bacterium	uncultured soil bacterium
HQ178750.1.1443	B2376_uncultured soil bacterium	21	1.35345e-07	0.172336	-0.503582	#N/A	Peripheral	Bacteria	Bacteroidetes	Bacteroidia	Sphingobacteriales	Lentimicrobiaceae	uncultured soil bacterium	uncultured soil bacterium
JF108099.1.1308	B472_alphaI cluster	21	2.02845e-07	0.30839	-0.560524	#N/A	Peripheral	Bacteria	Proteobacteria	Alphaproteobacteria	Rhizobiales	Beijerinckiaceae	alphaI cluster	Methylosinus trichosporium
JF175246.1.1371	B1948_Haliangium	21	0.000397444	0	0.265054	#N/A	Peripheral	Bacteria	Proteobacteria	Deltaproteobacteria	Myxococcales	Haliangiaceae	Haliangium	#N/A
JF222366.1.1366	B4588_f_67-14	21	0.000298473	0.172336	0.0970448	#N/A	Peripheral	Bacteria	Actinobacteria	Thermoleophilia	Solirubrobacterales	67-14	#N/A	#N/A
JN023931.1.1489	B10075_Dokdonella	21	1.36173e-05	0	-0.541603	#N/A	Peripheral	Bacteria	Proteobacteria	Gammaproteobacteria	Xanthomonadales	Rhodanobacteraceae	Dokdonella	#N/A
JX133563.1.1453	B291_uncultured	21	1.11298e-06	0	-0.218513	#N/A	Peripheral	Bacteria	Gemmatimonadetes	Gemmatimonadetes	Gemmatimonadales	Gemmatimonadaceae	uncultured	#N/A
KM205498.1.1496	B1034_uncultured soil bacterium	21	0.00147035	0.253968	0.0130404	#N/A	Peripheral	Bacteria	Proteobacteria	Deltaproteobacteria	Sva0485	uncultured soil bacterium	uncultured soil bacterium	uncultured soil bacterium
KR150755.1.1369	B886_Bacillus	21	0.000145884	0.253968	0.0130404	#N/A	Peripheral	Bacteria	Firmicutes	Bacilli	Bacillales	Bacillaceae	Bacillus	#N/A
KY190787.1.1421	B1816_Bryobacter	21	3.54316e-07	0	-0.291391	#N/A	Peripheral	Bacteria	Acidobacteria	Acidobacteriia	Solibacterales	Solibacteraceae (Subgroup 3)	Bryobacter	#N/A
1a1ec3fbec12ea3090004cea8516a319	F688_unidentified	21	0.00078182	0	0.265054	#N/A	Peripheral	Fungi	unidentified	unidentified	unidentified	unidentified	unidentified	unidentified
4398b1b219d217805c0b419e89901414	F819_unidentified	21	0.000346307	0	0.265054	#N/A	Peripheral	Fungi	Chytridiomycota	unidentified	unidentified	unidentified	unidentified	unidentified
6fc1a86befbbcbd5d943f19870d98ef6	F478_unidentified	21	0.00106447	0.172336	0.0970448	#N/A	Peripheral	Fungi	Ascomycota	Sordariomycetes	Sordariales	unidentified	unidentified	unidentified
d4d0d22af75ab50c15aafaa36e04f486	F4658_unidentified	21	8.87569e-08	0	-0.291391	#N/A	Peripheral	Fungi	unidentified	unidentified	unidentified	unidentified	unidentified	unidentified
d7ace15250b66370dcf5f3ba6cd5129c	F658_o_NA	21	0.00262631	0.0907029	0.181049	#N/A	Peripheral	Fungi	#N/A	#N/A	#N/A	#N/A	#N/A	#N/A
SH640359.07FU_KU534863_reps	F673_unidentified	21	0.000838719	0.489796	-0.742999	#N/A	Peripheral	Fungi	Rozellomycota	unidentified	unidentified	unidentified	unidentified	unidentified
9ea775c515825fd76dd7917b68934a8a	A1015_uncultured euryarchaeote	20	2.25611e-07	0	-0.257478	#N/A	Peripheral	Archaea	Diapherotrites	Micrarchaeia	uncultured euryarchaeote	uncultured euryarchaeote	uncultured euryarchaeote	uncultured euryarchaeote
aea10c18b90441989e3048f7a9bc99df	A667_o_NA	20	6.95445e-07	0	-0.570262	#N/A	Peripheral	Archaea	Crenarchaeota	Bathyarchaeia	#N/A	#N/A	#N/A	#N/A
0555ad21e25be18addc8c1772150b375	B4433_uncultured proteobacterium	20	4.48593e-07	0	-0.570262	#N/A	Peripheral	Bacteria	Nitrospirae	4-29-1	uncultured proteobacterium	uncultured proteobacterium	uncultured proteobacterium	uncultured proteobacterium
172fafde53fb7315b2f4e11ac981d85d	B2573_mle1-7	20	0.000308542	0.095	0.0970448	#N/A	Peripheral	Bacteria	Proteobacteria	Gammaproteobacteria	Betaproteobacteriales	Nitrosomonadaceae	mle1-7	uncultured beta proteobacterium
1d8c062a03d7dd6ef3e6c5aa1e3cd87c	B9997_uncultured	20	2.24627e-08	0.095	-0.530591	#N/A	Peripheral	Bacteria	Chloroflexi	Chloroflexia	Chloroflexales	Roseiflexaceae	uncultured	uncultured bacterium
28196dae69613e0958314851e85f72f2	B5036_Anaeromyxobacter	20	8.25727e-08	0.095	-0.503582	#N/A	Peripheral	Bacteria	Proteobacteria	Deltaproteobacteria	Myxococcales	Archangiaceae	Anaeromyxobacter	#N/A
37160ac3c80f20d9ac1ebc99b071ef8f	B1021_f_Roseiflexaceae	20	0.000647766	0	0.181049	#N/A	Peripheral	Bacteria	Chloroflexi	Chloroflexia	Chloroflexales	Roseiflexaceae	#N/A	#N/A
6b2a69f850ac58a6cbcade249bf1b239	B4209_uncultured	20	1.61986e-08	0	-0.323481	#N/A	Peripheral	Bacteria	Chloroflexi	Anaerolineae	Anaerolineales	Anaerolineaceae	uncultured	#N/A
8cbd1e21328bf394b04e3d120bb3070a	B9772_uncultured Bellilinea sp.	20	6.92653e-09	0	-0.343269	#N/A	Peripheral	Bacteria	Chloroflexi	Anaerolineae	uncultured Bellilinea sp.	uncultured Bellilinea sp.	uncultured Bellilinea sp.	uncultured Bellilinea sp.
a297dc48da1f0486283806a8f3c47773	B281_uncultured Gemmatimonadetes bacterium	20	0.00156899	0	0.181049	#N/A	Peripheral	Bacteria	Chloroflexi	Anaerolineae	SBR1031	uncultured Gemmatimonadetes bacterium	uncultured Gemmatimonadetes bacterium	uncultured Gemmatimonadetes bacterium
AB240269.1.1391	B3346_uncultured	20	4.13595e-08	0.095	-0.530591	#N/A	Peripheral	Bacteria	Firmicutes	Clostridia	Clostridiales	Ruminococcaceae	uncultured	#N/A
AB488363.1.1399	B1802_f_Archangiaceae	20	5.86973e-08	0.095	-0.277574	#N/A	Peripheral	Bacteria	Proteobacteria	Deltaproteobacteria	Myxococcales	Archangiaceae	#N/A	#N/A
AJ278146.1.1369	B785_Bacteriovorax	20	0.000488442	0	0.181049	#N/A	Peripheral	Bacteria	Proteobacteria	Deltaproteobacteria	Bdellovibrionales	Bacteriovoracaceae	Bacteriovorax	#N/A
AM489698.1.1454	B8148_f_Micromonosporaceae	20	1.81779e-08	0.095	-0.277574	#N/A	Peripheral	Bacteria	Actinobacteria	Actinobacteria	Micromonosporales	Micromonosporaceae	#N/A	#N/A
CU922361.1.1307	B9172_f_Rhizobiaceae	20	1.11091e-06	0.18	-0.558697	#N/A	Peripheral	Bacteria	Proteobacteria	Alphaproteobacteria	Rhizobiales	Rhizobiaceae	#N/A	#N/A
DQ404752.1.1451	B1934_Bauldia	20	1.28007e-07	0	-0.30616	#N/A	Peripheral	Bacteria	Proteobacteria	Alphaproteobacteria	Rhizobiales	Rhizobiales Incertae Sedis	Bauldia	#N/A
DQ816480.1.1440	B2676_Clostridium sensu stricto 3	20	3.0469e-06	0	-0.343269	#N/A	Peripheral	Bacteria	Firmicutes	Clostridia	Clostridiales	Clostridiaceae 1	Clostridium sensu stricto 3	#N/A
EF018337.1.1401	B1601_uncultured proteobacterium	20	9.13965e-07	0.18	-0.558697	#N/A	Peripheral	Bacteria	Proteobacteria	Deltaproteobacteria	Myxococcales	mle1-27	uncultured proteobacterium	uncultured proteobacterium
EF516803.1.1468	B2161_uncultured bacterium DA023	20	3.02712e-07	0	-0.30616	#N/A	Peripheral	Bacteria	Acidobacteria	Subgroup 6	uncultured bacterium DA023	uncultured bacterium DA023	uncultured bacterium DA023	uncultured bacterium DA023
FPLL01003424.15.1517	B1318_metagenome	20	2.30202e-07	0	-0.30616	#N/A	Peripheral	Bacteria	Bacteroidetes	Bacteroidia	Sphingobacteriales	AKYH767	metagenome	metagenome
FPLS01004424.1.1381	B8352_uncultured microorganism	20	2.33266e-07	0	-0.323481	#N/A	Peripheral	Bacteria	Armatimonadetes	Fimbriimonadia	Fimbriimonadales	Fimbriimonadaceae	uncultured microorganism	uncultured microorganism
FPLS01028421.1.1251	B3062_uncultured bacterium	20	2.30656e-06	0	-0.570262	#N/A	Peripheral	Bacteria	Bacteroidetes	Bacteroidia	Sphingobacteriales	env.OPS 17	uncultured bacterium	uncultured bacterium
FPLS01034797.35.1540	B719_Conexibacter	20	0.00113069	0	0.181049	#N/A	Peripheral	Bacteria	Actinobacteria	Thermoleophilia	Solirubrobacterales	Solirubrobacteraceae	Conexibacter	#N/A
GQ056820.1.1330	B155_Mycobacterium	20	0.00151838	0.185	0.0130404	#N/A	Peripheral	Bacteria	Actinobacteria	Actinobacteria	Corynebacteriales	Mycobacteriaceae	Mycobacterium	#N/A
GU127744.1.1446	B902_Aquisphaera	20	2.23853e-07	0.18	-0.558697	#N/A	Peripheral	Bacteria	Planctomycetes	Planctomycetacia	Isosphaerales	Isosphaeraceae	Aquisphaera	uncultured bacterium
GU249610.1.1551	B5141_Aetherobacter	20	4.17268e-07	0	-0.30616	#N/A	Peripheral	Bacteria	Proteobacteria	Deltaproteobacteria	Myxococcales	Polyangiaceae	Aetherobacter	#N/A
HE587098.1.1346	B2719_Rhodopila	20	3.59732e-08	0	-0.323481	#N/A	Peripheral	Bacteria	Proteobacteria	Alphaproteobacteria	Acetobacterales	Acetobacteraceae	Rhodopila	uncultured bacterium
JX505105.1.1478	B151_uncultured Desulfovirga sp.	20	0.000997313	0	0.181049	#N/A	Peripheral	Bacteria	Acidobacteria	Holophagae	Subgroup 7	uncultured Desulfovirga sp.	uncultured Desulfovirga sp.	uncultured Desulfovirga sp.
167bdc7a5fb5fbe9309799de67c43975	F1776_unidentified	20	4.81825e-07	0.375	-0.617467	#N/A	Peripheral	Fungi	unidentified	unidentified	unidentified	unidentified	unidentified	unidentified
4a139be93603fdbb870908c6978ee537	F467_unidentified	20	0.000551283	0.18	0.0130404	#N/A	Peripheral	Fungi	unidentified	unidentified	unidentified	unidentified	unidentified	unidentified
7d357f2da74d0ca72a57091066dc723c	F664_o_NA	20	0.000714066	0	0.181049	#N/A	Peripheral	Fungi	#N/A	#N/A	#N/A	#N/A	#N/A	#N/A
d0efbdd3c69024ae8981a367ba0de600	F499_o_NA	20	5.2649e-08	0	-0.283654	#N/A	Peripheral	Fungi	Ascomycota	Dothideomycetes	#N/A	#N/A	#N/A	#N/A
ef94c81f50157b1252dbe26369d7bd27	F5854_o_NA	20	8.69636e-07	0	-0.570262	#N/A	Peripheral	Fungi	#N/A	#N/A	#N/A	#N/A	#N/A	#N/A
f1d1a7a7bbbdf17955482dd88e171442	F761_Mortierella	20	0.000107001	0.255	-0.070964	#N/A	Peripheral	Fungi	Mortierellomycota	Mortierellomycetes	Mortierellales	Mortierellaceae	Mortierella	#N/A
f2091d138e4683d067585b3ba7c2b32f	F1294_o_NA	20	0.000160822	0.48	-0.827004	#N/A	Peripheral	Fungi	#N/A	#N/A	#N/A	#N/A	#N/A	#N/A
23d0872d5a09083c8db4eca629c6c4e0	B5591_unidentified	19	1.57378e-07	0	-0.35557	#N/A	Peripheral	Bacteria	Acidobacteria	Subgroup 6	unidentified	unidentified	unidentified	unidentified
61bef6131c1d16fb33bbf0caf8cd6c44	B8836_o_NA	19	3.44077e-06	0.099723	-0.31696	#N/A	Peripheral	Bacteria	Nitrospinae	P9X2b3D02	#N/A	#N/A	#N/A	#N/A
89204fed9a79800cb85ee9d315c75418	B148_uncultured bacterium SHD-71	19	0.00121747	0	0.0970448	#N/A	Peripheral	Bacteria	Chloroflexi	Anaerolineae	SJA-15	uncultured bacterium SHD-71	uncultured bacterium SHD-71	uncultured bacterium SHD-71
9545315ca67657fcfa65051f21e321dc	B406_uncultured prokaryote	19	0.000307004	0	0.0970448	#N/A	Peripheral	Bacteria	Acidobacteria	Aminicenantia	Aminicenantales	uncultured prokaryote	uncultured prokaryote	uncultured prokaryote
a433d190681e3d3b65612aa7ce955e46	B9545_pItb-vmat-59	19	1.05875e-07	0	-0.376159	#N/A	Peripheral	Bacteria	Proteobacteria	Gammaproteobacteria	Methylococcales	Methylomonaceae	pItb-vmat-59	#N/A
a93aeea6b1cb3e784dd79e36b169d7c2	B1041_uncultured Streptomyces sp.	19	0.000791634	0.193906	-0.070964	#N/A	Peripheral	Bacteria	Actinobacteria	MB-A2-108	uncultured Streptomyces sp.	uncultured Streptomyces sp.	uncultured Streptomyces sp.	uncultured Streptomyces sp.
AB240244.1.1465	B1064_uncultured eubacterium WCHB1-50	19	0.00113256	0	0.0970448	#N/A	Peripheral	Bacteria	Chloroflexi	Anaerolineae	RBG-13-54-9	uncultured eubacterium WCHB1-50	uncultured eubacterium WCHB1-50	uncultured eubacterium WCHB1-50
AB240251.1.1497	B1268_uncultured Desulfuromonadales bacterium	19	0.00402175	0.099723	0.0130404	#N/A	Peripheral	Bacteria	Acidobacteria	Holophagae	Subgroup 7	uncultured Desulfuromonadales bacterium	uncultured Desulfuromonadales bacterium	uncultured Desulfuromonadales bacterium
AB630511.1.1444	B604_uncultured soil bacterium	19	0.000184004	0.277008	-0.154968	#N/A	Peripheral	Bacteria	Bacteroidetes	Bacteroidia	Bacteroidales	SB-5	uncultured soil bacterium	uncultured soil bacterium
ac2172274c5a561da86447f3451b845a	B4437_Candidatus Competibacter	19	9.17297e-09	0.099723	-0.31696	#N/A	Peripheral	Bacteria	Proteobacteria	Gammaproteobacteria	Competibacterales	Competibacteraceae	Candidatus Competibacter	anaerobic digester metagenome
DQ125542.1.1454	B10481_uncultured	19	4.16325e-08	0	-0.319707	#N/A	Peripheral	Bacteria	Bacteroidetes	Bacteroidia	Chitinophagales	Chitinophagaceae	uncultured	Chitinophagaceae bacterium WF112
EF494371.1.1478	B149_uncultured Ferrimicrobium sp.	19	0.000423623	0	0.0970448	#N/A	Peripheral	Bacteria	Actinobacteria	Acidimicrobiia	IMCC26256	uncultured Ferrimicrobium sp.	uncultured Ferrimicrobium sp.	uncultured Ferrimicrobium sp.
EU644233.1.1455	B436_f_Lentimicrobiaceae	19	3.81789e-08	0	-0.319707	#N/A	Peripheral	Bacteria	Bacteroidetes	Bacteroidia	Sphingobacteriales	Lentimicrobiaceae	#N/A	#N/A
FJ936965.1.1497	B471_Arenimonas	19	0.00233219	0.188366	-0.070964	#N/A	Peripheral	Bacteria	Proteobacteria	Gammaproteobacteria	Xanthomonadales	Xanthomonadaceae	Arenimonas	#N/A
HM313065.1.1354	B2032_uncultured bacterium	19	0.000256455	0.099723	0.0130404	#N/A	Peripheral	Bacteria	Bacteroidetes	Bacteroidia	Sphingobacteriales	env.OPS 17	uncultured bacterium	uncultured bacterium
JX505271.1.1477	B4141_uncultured Geoalkalibacter sp.	19	3.46948e-07	0	-0.296442	#N/A	Peripheral	Bacteria	Proteobacteria	Deltaproteobacteria	Oligoflexales	0319-6G20	uncultured Geoalkalibacter sp.	uncultured Geoalkalibacter sp.
KC331385.1.1518	B4154_Sorangium	19	2.12944e-08	0.099723	-0.31696	#N/A	Peripheral	Bacteria	Proteobacteria	Deltaproteobacteria	Myxococcales	Polyangiaceae	Sorangium	#N/A
KF010683.1.1445	B9585_Phenylobacterium	19	6.74539e-08	0	-0.59892	#N/A	Peripheral	Bacteria	Proteobacteria	Alphaproteobacteria	Caulobacterales	Caulobacteraceae	Phenylobacterium	#N/A
KM200385.1.1519	B446_uncultured delta proteobacterium	19	0.000398782	0	0.0970448	#N/A	Peripheral	Bacteria	Proteobacteria	Deltaproteobacteria	Myxococcales	mle1-27	uncultured delta proteobacterium	uncultured delta proteobacterium
KR560025.1.1479	B924_uncultured proteobacterium	19	0.00134183	0	0.0970448	#N/A	Peripheral	Bacteria	Proteobacteria	Deltaproteobacteria	Myxococcales	MSB-4B10	uncultured proteobacterium	uncultured proteobacterium
KX753186.1.1480	B235_Rhodanobacter	19	0.000989372	0	0.0970448	#N/A	Peripheral	Bacteria	Proteobacteria	Gammaproteobacteria	Xanthomonadales	Rhodanobacteraceae	Rhodanobacter	uncultured Xanthomonadaceae bacterium
KY048274.1.1419	B11027_Methylobacterium	19	2.54986e-08	0.33241	-0.617467	#N/A	Peripheral	Bacteria	Proteobacteria	Alphaproteobacteria	Rhizobiales	Beijerinckiaceae	Methylobacterium	#N/A
c0f572a44e966454811b6dd3db84c37e	F1144_unidentified	19	0.000733222	0.277008	-0.154968	#N/A	Peripheral	Fungi	unidentified	unidentified	unidentified	unidentified	unidentified	unidentified
31ebbdd6f7d16274097d307d4a552d3d	B2599_uncultured bacterium	18	2.87643e-08	0.104938	-0.356345	#N/A	Peripheral	Bacteria	Nitrospirae	Thermodesulfovibrionia	uncultured	uncultured bacterium	uncultured bacterium	uncultured bacterium
5c08284c7dcf64f1d1a9fe75d0f585bd	B1443_uncultured Caldilineaceae bacterium	18	4.83789e-06	0.197531	-0.588996	#N/A	Peripheral	Bacteria	Chloroflexi	Anaerolineae	RBG-13-54-9	uncultured Caldilineaceae bacterium	uncultured Caldilineaceae bacterium	uncultured Caldilineaceae bacterium
60bb81a2aa77565e17fd7d8a7f226ec4	B1063_uncultured bacterium	18	0.00025523	0.104938	-0.070964	#N/A	Peripheral	Bacteria	Nitrospirae	Thermodesulfovibrionia	uncultured	uncultured bacterium	uncultured bacterium	uncultured bacterium
AJ237756.1.1437	B4087_Clostridium sensu stricto 12	18	1.81092e-06	0	-0.35576	#N/A	Peripheral	Bacteria	Firmicutes	Clostridia	Clostridiales	Clostridiaceae 1	Clostridium sensu stricto 12	Clostridium acidisoli
AJ888562.1.1494	B3363_Parasegetibacter	18	0.00100848	0.197531	-0.154968	#N/A	Peripheral	Bacteria	Bacteroidetes	Bacteroidia	Chitinophagales	Chitinophagaceae	Parasegetibacter	#N/A
AM292613.1.1279	B1644_uncultured bacterium	18	0.000272545	0.104938	-0.070964	#N/A	Peripheral	Bacteria	Chloroflexi	JG30-KF-CM66	uncultured bacterium	uncultured bacterium	uncultured bacterium	uncultured bacterium
EF018409.1.1451	B120_uncultured Burkholderiaceae bacterium	18	0.00109823	0	0.0130404	#N/A	Peripheral	Bacteria	Proteobacteria	Gammaproteobacteria	Betaproteobacteriales	SC-I-84	uncultured Burkholderiaceae bacterium	uncultured Burkholderiaceae bacterium
FJ468378.1.1308	B4865_uncultured	18	2.89997e-05	0.5	-0.742999	#N/A	Peripheral	Bacteria	Chloroflexi	Anaerolineae	Anaerolineales	Anaerolineaceae	uncultured	#N/A
FJ478704.1.1492	B1029_f_SC-I-84	18	1.90913e-07	0	-0.376736	#N/A	Peripheral	Bacteria	Proteobacteria	Gammaproteobacteria	Betaproteobacteriales	SC-I-84	#N/A	#N/A
GFBP01138475.1.1236	B2996_possible genus 04	18	0.000177092	0.364198	-0.322977	#N/A	Peripheral	Bacteria	Fibrobacteres	Fibrobacteria	Fibrobacterales	Fibrobacteraceae	possible genus 04	Juncus effusus
HM269949.1.1376	B253_Anaeromyxobacter	18	0.000381225	0	0.0130404	#N/A	Peripheral	Bacteria	Proteobacteria	Deltaproteobacteria	Myxococcales	Archangiaceae	Anaeromyxobacter	#N/A
HM335384.1.1352	B585_Mucilaginibacter	18	0.00111213	0	0.0130404	#N/A	Peripheral	Bacteria	Bacteroidetes	Bacteroidia	Sphingobacteriales	Sphingobacteriaceae	Mucilaginibacter	#N/A
HQ697384.1.1469	B321_o_NA	18	0.00356402	0.401235	-0.699228	#N/A	Peripheral	Bacteria	Chloroflexi	KD4-96	#N/A	#N/A	#N/A	#N/A
JF265922.1.1363	B243_Terrimonas	18	0.000948964	0.104938	-0.070964	#N/A	Peripheral	Bacteria	Bacteroidetes	Bacteroidia	Chitinophagales	Chitinophagaceae	Terrimonas	#N/A
JN609373.1.1487	B4368_uncultured	18	1.89761e-05	0.104938	-0.070964	#N/A	Peripheral	Bacteria	Gemmatimonadetes	Gemmatimonadetes	Gemmatimonadales	Gemmatimonadaceae	uncultured	Gemmatimonadetes bacterium SCN 70-22
JN615838.1.1398	B7533_uncultured candidate division SPAM bacterium	18	1.50645e-07	0	-0.376736	#N/A	Peripheral	Bacteria	Rokubacteria	NC10	Rokubacteriales	uncultured candidate division SPAM bacterium	uncultured candidate division SPAM bacterium	uncultured candidate division SPAM bacterium
JX098355.1.1340	B561_Jatrophihabitans	18	0.00110837	0.104938	-0.070964	#N/A	Peripheral	Bacteria	Actinobacteria	Actinobacteria	Frankiales	Frankiaceae	Jatrophihabitans	uncultured Frankineae bacterium
JX431979.1.1396	B7940_Defluviicoccus	18	2.26974e-05	0.104938	-0.412024	#N/A	Peripheral	Bacteria	Proteobacteria	Alphaproteobacteria	Rhodospirillales	Rhodopirillaceae	Defluviicoccus	metagenome
KC541166.1.1494	B8477_Bryobacter	18	1.83028e-07	0	-0.335407	#N/A	Peripheral	Bacteria	Acidobacteria	Acidobacteriia	Solibacterales	Solibacteraceae (Subgroup 3)	Bryobacter	#N/A
KT714219.1.1518	B9063_Geobacter	18	3.3162e-07	0	-0.335407	#N/A	Peripheral	Bacteria	Proteobacteria	Deltaproteobacteria	Desulfuromonadales	Geobacteraceae	Geobacter	#N/A
KU232320.1.1210	B7630_Streptomyces	18	6.43033e-08	0	-0.335407	#N/A	Peripheral	Bacteria	Actinobacteria	Actinobacteria	Streptomycetales	Streptomycetaceae	Streptomyces	#N/A
KU951461.1.1485	B24_f_Micrococcaceae	18	0.00121406	0	0.0130404	#N/A	Peripheral	Bacteria	Actinobacteria	Actinobacteria	Micrococcales	Micrococcaceae	#N/A	#N/A
09e705883d31ad2cef569f318ad3c3c4	F154_o_NA	18	5.30428e-08	0	-0.38766	#N/A	Peripheral	Fungi	Ascomycota	#N/A	#N/A	#N/A	#N/A	#N/A
0d4f8d2beb2cf3296aaf18d0a06e8ce2	F1459_o_NA	18	3.27989e-05	0	0.0130404	#N/A	Peripheral	Fungi	#N/A	#N/A	#N/A	#N/A	#N/A	#N/A
112444f4ec4cf3f52c1b22f88d4efb10	F3871_unidentified	18	3.38804e-08	0.104938	-0.586803	#N/A	Peripheral	Fungi	unidentified	unidentified	unidentified	unidentified	unidentified	unidentified
42f72ca769978782554fa856e92e3c59	F1645_unidentified	18	0.000849958	0	0.0130404	#N/A	Peripheral	Fungi	Ascomycota	Orbiliomycetes	Orbiliales	Orbiliaceae	unidentified	unidentified
5ef049681ade437f42302e73436e069f	F1885_unidentified	18	9.17522e-05	0	0.0130404	#N/A	Peripheral	Fungi	unidentified	unidentified	unidentified	unidentified	unidentified	unidentified
89c26efbd04a3c337b019d9e968fabc9	F4225_unidentified	18	8.26537e-08	0	-0.38766	#N/A	Peripheral	Fungi	unidentified	unidentified	unidentified	unidentified	unidentified	unidentified
8c5b933b2c0167afaf8d488bda3dd283	F1175_unidentified	18	0.000534601	0	0.0130404	#N/A	Peripheral	Fungi	unidentified	unidentified	unidentified	unidentified	unidentified	unidentified
b4d5b5347afcd493c27ad3ce7b878287	F2959_o_NA	18	2.37064e-07	0	-0.627578	#N/A	Peripheral	Fungi	#N/A	#N/A	#N/A	#N/A	#N/A	#N/A
c173cf51ca5b6b3ad1f93e7113b11417	F512_unidentified	18	0.00133146	0.197531	-0.154968	#N/A	Peripheral	Fungi	Rozellomycota	unidentified	unidentified	unidentified	unidentified	unidentified
SH183633.07FU_JX975906_reps	F1159_Mortierella	18	0.00207319	0	0.0130404	#N/A	Peripheral	Fungi	Mortierellomycota	Mortierellomycetes	Mortierellales	Mortierellaceae	Mortierella	Mortierella_alpina
SH528318.07FU_JX333635_reps	F153_Fusarium	18	1.06062e-08	0.104938	-0.356345	#N/A	Peripheral	Fungi	Ascomycota	Sordariomycetes	Hypocreales	Nectriaceae	Fusarium	unidentified
SH529867.07FU_JX385734_reps	F374_Fusarium	18	0.000296939	0	0.0130404	#N/A	Peripheral	Fungi	Ascomycota	Sordariomycetes	Hypocreales	Nectriaceae	Fusarium	Fusarium_proliferatum
02b6be15aba42befecbaf12d5e162e31	B2570_Desulfobacca	17	6.10317e-05	0	-0.070964	#N/A	Peripheral	Bacteria	Proteobacteria	Deltaproteobacteria	Syntrophobacterales	Syntrophaceae	Desulfobacca	#N/A
289cd18bcdedfdcc21fcf1764cdb6d91	B6053_f_WD2101 soil group	17	0.00027948	0.110727	-0.154968	#N/A	Peripheral	Bacteria	Planctomycetes	Phycisphaerae	Tepidisphaerales	WD2101 soil group	#N/A	#N/A
4ea84573b3e97ecec33dfc1c24520e18	B4246_o_NA	17	0.000175341	0.290657	-0.322977	#N/A	Peripheral	Bacteria	Actinobacteria	Coriobacteriia	#N/A	#N/A	#N/A	#N/A
AB486984.1.1378	B272_uncultured Chlorobi bacterium	17	0.000282885	0	-0.070964	#N/A	Peripheral	Bacteria	Bacteroidetes	Ignavibacteria	Kryptoniales	BSV26	uncultured Chlorobi bacterium	uncultured Chlorobi bacterium
acb4aba60c38aeacee1346b8ca0cfb0f	B1348_uncultured	17	0.000327265	0.207612	-0.238973	#N/A	Peripheral	Bacteria	Proteobacteria	Deltaproteobacteria	Syntrophobacterales	Syntrophobacteraceae	uncultured	uncultured proteobacterium
e22fd387f4f838a609f00dbec13d988d	B3036_f_uncultured	17	0.000273136	0	-0.070964	#N/A	Peripheral	Bacteria	Actinobacteria	Thermoleophilia	Gaiellales	uncultured	#N/A	#N/A
fb06fab563094b1af4fc9cc00198efac	B8528_uncultured	17	2.87237e-06	0	-0.441937	#N/A	Peripheral	Bacteria	Proteobacteria	Deltaproteobacteria	Syntrophobacterales	Syntrophaceae	uncultured	uncultured delta proteobacterium
FJ822630.1.1383	B4995_Chthoniobacter	17	1.71002e-07	0	-0.656236	#N/A	Peripheral	Bacteria	Verrucomicrobia	Verrucomicrobiae	Chthoniobacterales	Chthoniobacteraceae	Chthoniobacter	#N/A
FQ659511.1.1352	B316_uncultured soil bacterium	17	0.000182239	0.304498	-0.322977	#N/A	Peripheral	Bacteria	Bacteroidetes	Bacteroidia	Bacteroidales	SB-5	uncultured soil bacterium	uncultured soil bacterium
GQ263951.1.1480	B8201_Acidibacter	17	9.56056e-09	0	-0.441937	#N/A	Peripheral	Bacteria	Proteobacteria	Gammaproteobacteria	Gammaproteobacteria Incertae Sedis	Unknown Family	Acidibacter	#N/A
HM297893.1.1347	B59_f_Intrasporangiaceae	17	0.0028697	0.484429	-0.911008	#N/A	Peripheral	Bacteria	Actinobacteria	Actinobacteria	Micrococcales	Intrasporangiaceae	#N/A	#N/A
HM748740.1.1434	B587_bacterium Ellin7530	17	0.0011001	0.110727	-0.154968	#N/A	Peripheral	Bacteria	Actinobacteria	Thermoleophilia	Gaiellales	uncultured	bacterium Ellin7530	bacterium Ellin7530
HQ330534.1.1369	B335_uncultured soil bacterium	17	0.000545695	0	-0.070964	#N/A	Peripheral	Bacteria	Acidobacteria	Subgroup 21	uncultured soil bacterium	uncultured soil bacterium	uncultured soil bacterium	uncultured soil bacterium
JF235961.1.1342	B6282_Hymenobacter	17	2.77774e-08	0.110727	-0.588996	#N/A	Peripheral	Bacteria	Bacteroidetes	Bacteroidia	Cytophagales	Hymenobacteraceae	Hymenobacter	#N/A
JQ428678.1.1463	B1229_uncultured bacterium	17	0.000108365	0.456747	-0.57499	#N/A	Peripheral	Bacteria	Armatimonadetes	Fimbriimonadia	Fimbriimonadales	Fimbriimonadaceae	uncultured bacterium	uncultured bacterium
KC172352.1.1456	B1068_uncultured	17	0.00162403	0.110727	-0.154968	#N/A	Peripheral	Bacteria	Proteobacteria	Alphaproteobacteria	Reyranellales	Reyranellaceae	uncultured	#N/A
KM200729.1.1523	B8648_o_Rokubacteriales	17	6.4938e-08	0	-0.374371	#N/A	Peripheral	Bacteria	Rokubacteria	NC10	Rokubacteriales	#N/A	#N/A	#N/A
KP749324.1.1352	B2054_Devosia	17	1.86656e-07	0	-0.374371	#N/A	Peripheral	Bacteria	Proteobacteria	Alphaproteobacteria	Rhizobiales	Devosiaceae	Devosia	#N/A
KU362288.1.1316	B185_f_Micrococcaceae	17	0.000348494	0	-0.070964	#N/A	Peripheral	Bacteria	Actinobacteria	Actinobacteria	Micrococcales	Micrococcaceae	#N/A	#N/A
LN573789.1.1382	B1466_uncultured Rubrobacteria bacterium	17	2.33788e-05	0.207612	-0.238973	#N/A	Peripheral	Bacteria	Actinobacteria	Thermoleophilia	Solirubrobacterales	67-14	uncultured Rubrobacteria bacterium	uncultured Rubrobacteria bacterium
5c3c9fbef3643f3a6af2832187fc8e05	F2628_o_NA	17	9.10817e-08	0	-0.41975	#N/A	Peripheral	Fungi	#N/A	#N/A	#N/A	#N/A	#N/A	#N/A
5ca0df9c041114ba13a7e36c58d1114b	F2629_o_NA	17	1.1139e-07	0.110727	-0.614909	#N/A	Peripheral	Fungi	#N/A	#N/A	#N/A	#N/A	#N/A	#N/A
5cb7a51bed5c364e642bd513fe338a36	F6526_o_NA	17	1.08221e-07	0.110727	-0.684894	#N/A	Peripheral	Fungi	#N/A	#N/A	#N/A	#N/A	#N/A	#N/A
63cfa4a4c14888a1c8f3da638b6e7818	F1268_unidentified	17	0.00108998	0	-0.070964	#N/A	Peripheral	Fungi	unidentified	unidentified	unidentified	unidentified	unidentified	unidentified
78982f000cc90517710e540bc643e892	F501_unidentified	17	0.000650306	0	-0.070964	#N/A	Peripheral	Fungi	Chytridiomycota	unidentified	unidentified	unidentified	unidentified	unidentified
8783d1e34398b5467169248d6db315e8	F538_unidentified	17	0.00122677	0.380623	-0.406982	#N/A	Peripheral	Fungi	Mucoromycota	Endogonomycetes	Endogonales	unidentified	unidentified	unidentified
2fa646dd7399dc4b5c9ac501bc5883ab	B8272_uncultured	16	4.27565e-08	0	-0.451839	#N/A	Peripheral	Bacteria	Chloroflexi	Anaerolineae	Anaerolineales	Anaerolineaceae	uncultured	uncultured Chloroflexi bacterium
57308de2f397ebf3b3b28cdd369676e8	B10534_f_0319-6G20	16	1.697e-08	0	-0.427866	#N/A	Peripheral	Bacteria	Proteobacteria	Deltaproteobacteria	Oligoflexales	0319-6G20	#N/A	#N/A
726b742e2c0beaabb8261d2718d8629c	B11381_f_WD2101 soil group	16	1.24275e-07	0	-0.684894	#N/A	Peripheral	Bacteria	Planctomycetes	Phycisphaerae	Tepidisphaerales	WD2101 soil group	#N/A	#N/A
9c6e75ab8c911bc17600d8b190eec72c	B318_uncultured bacterium SJA-22	16	0.00108194	0	-0.154968	#N/A	Peripheral	Bacteria	Armatimonadetes	Chthonomonadetes	Chthonomonadales	uncultured bacterium SJA-22	uncultured bacterium SJA-22	uncultured bacterium SJA-22
AB179507.1.1498	B4131_Methylotenera	16	2.96011e-07	0	-0.413336	#N/A	Peripheral	Bacteria	Proteobacteria	Gammaproteobacteria	Betaproteobacteriales	Methylophilaceae	Methylotenera	uncultured Methylophilaceae bacterium
AB630777.1.1477	B1273_Haliangium	16	0.000477061	0.117188	-0.238973	#N/A	Peripheral	Bacteria	Proteobacteria	Deltaproteobacteria	Myxococcales	Haliangiaceae	Haliangium	#N/A
b13aa3e15fc88608d6296813ed2c64c4	B2333_o_NA	16	9.95989e-05	0.304688	-0.406982	#N/A	Peripheral	Bacteria	Proteobacteria	Deltaproteobacteria	#N/A	#N/A	#N/A	#N/A
dbcc4f6a548855972440a0b82eabf372	B10383_Desulfatiglans	16	1.47635e-08	0	-0.427866	#N/A	Peripheral	Bacteria	Proteobacteria	Deltaproteobacteria	Desulfarculales	Desulfarculaceae	Desulfatiglans	uncultured prokaryote
e3a11bfd9c6892eb6bd810bf68fe3cb8	B2217_metagenome	16	9.24407e-06	0.117188	-0.238973	#N/A	Peripheral	Bacteria	Proteobacteria	Deltaproteobacteria	Myxococcales	Blfdi19	metagenome	metagenome
EU799951.1.1499	B2757_uncultured beta proteobacterium	16	1.74051e-08	0	-0.447312	#N/A	Peripheral	Bacteria	Proteobacteria	Gammaproteobacteria	Betaproteobacteriales	B1-7BS	uncultured beta proteobacterium	uncultured beta proteobacterium
FM872716.1.1468	B505_f_Micromonosporaceae	16	0.000319706	0	-0.154968	#N/A	Peripheral	Bacteria	Actinobacteria	Actinobacteria	Micromonosporales	Micromonosporaceae	#N/A	#N/A
FPLS01055687.40.1515	B4137_Dongia	16	1.01567e-07	0.117188	-0.643016	#N/A	Peripheral	Bacteria	Proteobacteria	Alphaproteobacteria	Dongiales	Dongiaceae	Dongia	metagenome
FQ659384.1.1376	B900_uncultured soil bacterium	16	0.00115367	0.601562	1.14508	#N/A	Peripheral	Bacteria	Proteobacteria	Deltaproteobacteria	Myxococcales	BIrii41	uncultured soil bacterium	uncultured soil bacterium
GQ390237.1.1464	B1402_Geothrix	16	5.69625e-05	0.117188	-0.238973	#N/A	Peripheral	Bacteria	Acidobacteria	Holophagae	Holophagales	Holophagaceae	Geothrix	#N/A
GU208255.1.1445	B686_Ferritrophicum	16	2.7147e-08	0	-0.451839	#N/A	Peripheral	Bacteria	Proteobacteria	Gammaproteobacteria	Betaproteobacteriales	Sulfuricellaceae	Ferritrophicum	uncultured prokaryote
JN038785.1.1511	B432_uncultured Acidobacterium sp.	16	0.000593689	0.117188	-0.238973	#N/A	Peripheral	Bacteria	Acidobacteria	Subgroup 22	uncultured Acidobacterium sp.	uncultured Acidobacterium sp.	uncultured Acidobacterium sp.	uncultured Acidobacterium sp.
JX505365.1.1481	B1777_uncultured Syntrophobacteraceae bacterium	16	0.000866001	0	-0.154968	#N/A	Peripheral	Bacteria	Proteobacteria	Deltaproteobacteria	Oligoflexales	0319-6G20	uncultured Syntrophobacteraceae bacterium	uncultured Syntrophobacteraceae bacterium
KM205513.1.1426	B164_GOUTB8	16	4.30725e-05	0	-0.154968	#N/A	Peripheral	Bacteria	Acidobacteria	Acidobacteriia	Solibacterales	Solibacteraceae (Subgroup 3)	GOUTB8	uncultured soil bacterium
KR095243.1.1546	B930_uncultured soil bacterium PBS-III-20	16	0.000786893	0	-0.154968	#N/A	Peripheral	Bacteria	Kiritimatiellaeota	Kiritimatiellae	WCHB1-41	uncultured soil bacterium PBS-III-20	uncultured soil bacterium PBS-III-20	uncultured soil bacterium PBS-III-20
KX504777.1.1528	B454_uncultured bacterium	16	0.000288024	0	-0.154968	#N/A	Peripheral	Bacteria	Nitrospirae	Thermodesulfovibrionia	uncultured	uncultured bacterium	uncultured bacterium	uncultured bacterium
KX504856.1.1527	B1845_Desulfatiglans	16	0	0	-0.684894	#N/A	Peripheral	Bacteria	Proteobacteria	Deltaproteobacteria	Desulfarculales	Desulfarculaceae	Desulfatiglans	uncultured Desulfobacteraceae bacterium
LN870938.1.1437	B2364_uncultured soil bacterium PBS-III-20	16	9.27204e-09	0.21875	-0.645938	#N/A	Peripheral	Bacteria	Kiritimatiellaeota	Kiritimatiellae	WCHB1-41	uncultured soil bacterium PBS-III-20	uncultured soil bacterium PBS-III-20	uncultured soil bacterium PBS-III-20
22d2c13e8d1b8ee2803a91317000b54f	F679_unidentified	16	0.00130865	0.46875	-0.632044	#N/A	Peripheral	Fungi	unidentified	unidentified	unidentified	unidentified	unidentified	unidentified
3b1fa3d1c8d77d136fb69d86d8346d92	F800_o_NA	16	4.57547e-05	0.21875	-0.322977	#N/A	Peripheral	Fungi	#N/A	#N/A	#N/A	#N/A	#N/A	#N/A
65c48ce39057f5a5869de18d5bd78353	F4787_o_NA	16	3.64658e-08	0	-0.451839	#N/A	Peripheral	Fungi	#N/A	#N/A	#N/A	#N/A	#N/A	#N/A
744f79b79bb6415e99e5b2cd98be1de6	F270_o_NA	16	0.0004727	0	-0.154968	#N/A	Peripheral	Fungi	#N/A	#N/A	#N/A	#N/A	#N/A	#N/A
cfa2a90c5a7237e41af8adf60336ccaf	F572_o_NA	16	0.000783244	0	-0.154968	#N/A	Peripheral	Fungi	#N/A	#N/A	#N/A	#N/A	#N/A	#N/A
SH182100.07FU_AF385450_refs	F709_Dioszegia	16	0.000237102	0.375	-0.727334	#N/A	Peripheral	Fungi	Basidiomycota	Tremellomycetes	Tremellales	Bulleribasidiaceae	Dioszegia	#N/A
SH183638.07FU_JX975925_reps	F3287_Mortierella	16	2.92053e-06	0	-0.474827	#N/A	Peripheral	Fungi	Mortierellomycota	Mortierellomycetes	Mortierellales	Mortierellaceae	Mortierella	Mortierella_alpina
70d3d0906b63789de0091a082f1abf65	A451_uncultured archaeon	15	1.39691e-07	0	-0.4523	#N/A	Peripheral	Archaea	Nanoarchaeaeota	Woesearchaeia	uncultured archaeon	uncultured archaeon	uncultured archaeon	uncultured archaeon
b438ad5efeeb273225e04ed145a49d24	A1022_uncultured archaeon	15	0	0	-0.4523	#N/A	Peripheral	Archaea	Nanoarchaeaeota	Woesearchaeia	uncultured archaeon	uncultured archaeon	uncultured archaeon	uncultured archaeon
554bddf1b80686721cc7cbd4a4cb1792	B12094_Chthonomonas	15	9.93608e-07	0	-0.46392	#N/A	Peripheral	Bacteria	Armatimonadetes	Chthonomonadetes	Chthonomonadales	Chthonomonadaceae	Chthonomonas	uncultured bacterium
6676e0a4160fb7078f33d39f31c94501	B4254_uncultured	15	6.22679e-05	0	-0.238973	#N/A	Peripheral	Bacteria	Chloroflexi	Chloroflexia	Chloroflexales	Roseiflexaceae	uncultured	uncultured bacterium
92c21cb3eec0c1bc83eab7e36bfcdbb8	B11606_Fimbriiglobus	15	3.23238e-09	0.32	-0.70288	#N/A	Peripheral	Bacteria	Planctomycetes	Planctomycetacia	Gemmatales	Gemmataceae	Fimbriiglobus	metagenome
94f842adb51baa213d77a4e31806d02f	B10359_o_S085	15	4.04047e-09	0.124444	-0.671122	#N/A	Peripheral	Bacteria	Chloroflexi	Dehalococcoidia	S085	#N/A	#N/A	#N/A
AB234252.1.1496	B825_Ignavibacterium	15	0.000279798	0	-0.238973	#N/A	Peripheral	Bacteria	Bacteroidetes	Ignavibacteria	Ignavibacteriales	Ignavibacteriaceae	Ignavibacterium	uncultured bacterium
AB426209.1.1394	B295_uncultured prokaryote	15	0.000296208	0	-0.238973	#N/A	Peripheral	Bacteria	Acidobacteria	Aminicenantia	Aminicenantales	uncultured prokaryote	uncultured prokaryote	uncultured prokaryote
AB600410.1.1410	B797_Bacteriovorax	15	0.000133798	0.124444	-0.322977	#N/A	Peripheral	Bacteria	Proteobacteria	Deltaproteobacteria	Bdellovibrionales	Bacteriovoracaceae	Bacteriovorax	#N/A
AB672318.1.1476	B907_uncultured bacterium	15	0.000374533	0	-0.238973	#N/A	Peripheral	Bacteria	Gemmatimonadetes	S0134 terrestrial group	uncultured bacterium	uncultured bacterium	uncultured bacterium	uncultured bacterium
AB696046.1.1490	B3985_Desulfosporosinus	15	8.33406e-05	0	-0.238973	#N/A	Peripheral	Bacteria	Firmicutes	Clostridia	Clostridiales	Peptococcaceae	Desulfosporosinus	#N/A
AY922073.1.1351	B3263_uncultured Chloroflexus sp.	15	3.47587e-05	0	-0.238973	#N/A	Peripheral	Bacteria	Chloroflexi	TK10	uncultured Chloroflexus sp.	uncultured Chloroflexus sp.	uncultured Chloroflexus sp.	uncultured Chloroflexus sp.
b1408690ef69d2ab0fb8ee8e8705331d	B8633_uncultured bacterium	15	7.71363e-09	0	-0.483929	#N/A	Peripheral	Bacteria	Nitrospirae	Thermodesulfovibrionia	uncultured	uncultured bacterium	uncultured bacterium	uncultured bacterium
c5c1d5267bace9e5f91599636bf395c9	B977_Ignavibacterium	15	0.000178962	0	-0.238973	#N/A	Peripheral	Bacteria	Bacteroidetes	Ignavibacteria	Ignavibacteriales	Ignavibacteriaceae	Ignavibacterium	uncultured Chlorobi bacterium
EF020258.1.1328	B2353_uncultured	15	5.60115e-05	0	-0.238973	#N/A	Peripheral	Bacteria	Proteobacteria	Alphaproteobacteria	Micropepsales	Micropepsaceae	uncultured	#N/A
EU335240.1.1487	B1530_f_AKYH767	15	1.61986e-08	0	-0.483929	#N/A	Peripheral	Bacteria	Bacteroidetes	Bacteroidia	Sphingobacteriales	AKYH767	#N/A	#N/A
f0622dc58e55fc3cb460188a912069e2	B782_uncultured Thermaerobacter sp.	15	0.000502741	0.391111	-0.57499	#N/A	Peripheral	Bacteria	Acidobacteria	Holophagae	Subgroup 7	uncultured Thermaerobacter sp.	uncultured Thermaerobacter sp.	uncultured Thermaerobacter sp.
fd596235ebd412615382c915f7562c5d	B8158_uncultured Caldilineaceae bacterium	15	3.60592e-08	0	-0.4523	#N/A	Peripheral	Bacteria	Chloroflexi	Anaerolineae	RBG-13-54-9	uncultured Caldilineaceae bacterium	uncultured Caldilineaceae bacterium	uncultured Caldilineaceae bacterium
FPLL01000557.16.1508	B1032_uncultured	15	0.000385156	0	-0.238973	#N/A	Peripheral	Bacteria	Gemmatimonadetes	Gemmatimonadetes	Gemmatimonadales	Gemmatimonadaceae	uncultured	metagenome
FPLS01020328.3.1405	B8978_Nocardioides	15	0	0.124444	-0.671122	#N/A	Peripheral	Bacteria	Actinobacteria	Actinobacteria	Propionibacteriales	Nocardioidaceae	Nocardioides	#N/A
FPLS01052817.14.1529	B448_metagenome	15	0.00120747	0.124444	-0.322977	#N/A	Peripheral	Bacteria	Proteobacteria	Gammaproteobacteria	CCD24	metagenome	metagenome	metagenome
HQ330596.1.1390	B1142_uncultured Acidobacteria bacterium	15	1.9982e-08	0.124444	-0.474502	#N/A	Peripheral	Bacteria	Acidobacteria	Acidobacteriia	Subgroup 13	uncultured Acidobacteria bacterium	uncultured Acidobacteria bacterium	uncultured Acidobacteria bacterium
HQ904206.1.1486	B10751_uncultured bacterium SJA-121	15	0	0	-0.46392	#N/A	Peripheral	Bacteria	Armatimonadetes	uncultured	uncultured bacterium SJA-121	uncultured bacterium SJA-121	uncultured bacterium SJA-121	uncultured bacterium SJA-121
JF128617.1.1308	B899_Skermanella	15	0.000124769	0	-0.238973	#N/A	Peripheral	Bacteria	Proteobacteria	Alphaproteobacteria	Azospirillales	Azospirillaceae	Skermanella	#N/A
JX223525.1.1474	B1646_Flavobacterium	15	0.000459302	0	-0.238973	#N/A	Peripheral	Bacteria	Bacteroidetes	Bacteroidia	Flavobacteriales	Flavobacteriaceae	Flavobacterium	#N/A
JX575652.1.1430	B8472_f_Pedosphaeraceae	15	1.86287e-08	0.124444	-0.474502	#N/A	Peripheral	Bacteria	Verrucomicrobia	Verrucomicrobiae	Pedosphaerales	Pedosphaeraceae	#N/A	#N/A
KC554091.1.1511	B475_metagenome	15	0.000128852	0	-0.238973	#N/A	Peripheral	Bacteria	Actinobacteria	Acidimicrobiia	IMCC26256	metagenome	metagenome	metagenome
KC554543.1.1535	B9978_uncultured Rubrobacteraceae bacterium	15	6.57492e-07	0.124444	-0.742211	#N/A	Peripheral	Bacteria	Actinobacteria	Thermoleophilia	Solirubrobacterales	67-14	uncultured Rubrobacteraceae bacterium	uncultured Rubrobacteraceae bacterium
1b3e1f1b379b63e667f7f7f46a2c1ab4	F1508_o_NA	15	2.40022e-08	0	-0.483929	#N/A	Peripheral	Fungi	#N/A	#N/A	#N/A	#N/A	#N/A	#N/A
241a82ebd0c712d11f7dca8e1cc0efa8	F411_unidentified	15	0.000465781	0.124444	-0.322977	#N/A	Peripheral	Fungi	Basidiomycota	Agaricomycetes	Cantharellales	Ceratobasidiaceae	unidentified	unidentified
8c6d421683dd7a28d597193e03c5ad79	F2885_o_NA	15	9.83629e-05	0	-0.238973	#N/A	Peripheral	Fungi	#N/A	#N/A	#N/A	#N/A	#N/A	#N/A
e342e78818681e771f6b1c4528cbd3da	F1126_o_NA	15	0.000218564	0	-0.238973	#N/A	Peripheral	Fungi	#N/A	#N/A	#N/A	#N/A	#N/A	#N/A
SH176583.07FU_FN397265_reps	F755_Fusarium	15	0.00130677	0.24	-0.406982	#N/A	Peripheral	Fungi	Ascomycota	Sordariomycetes	Hypocreales	Nectriaceae	Fusarium	Fusarium_solani
5a8497ee12cfbe5ea3f88f18fbe01d08	A998_uncultured archaeon	14	8.93157e-09	1.11022e-16	-0.516018	#N/A	Peripheral	Archaea	Altiarchaeota	Altiarchaeia	uncultured archaeon	uncultured archaeon	uncultured archaeon	uncultured archaeon
60e0161b5120382d990aa08bf4f322cd	A566_uncultured euryarchaeote	14	1.84921e-08	1.11022e-16	-0.540606	#N/A	Peripheral	Archaea	Nanoarchaeaeota	Nanohaloarchaeia	Deep Sea Euryarchaeotic Group(DSEG)	uncultured euryarchaeote	uncultured euryarchaeote	uncultured euryarchaeote
AB161341.1.943	A284_uncultured Thermofilum sp.	14	0.000151699	0.132653	-0.406982	#N/A	Peripheral	Archaea	Crenarchaeota	Bathyarchaeia	uncultured Thermofilum sp.	uncultured Thermofilum sp.	uncultured Thermofilum sp.	uncultured Thermofilum sp.
2df9c9588272869401b401d0a68edf1d	B11049_f_Bacteriovoracaceae	14	0	1.11022e-16	-0.540606	#N/A	Peripheral	Bacteria	Proteobacteria	Deltaproteobacteria	Bdellovibrionales	Bacteriovoracaceae	#N/A	#N/A
a295c2a611d3e99dd244b562dc717caa	B1445_uncultured Chlorobi bacterium	14	5.30179e-05	1.11022e-16	-0.322977	#N/A	Peripheral	Bacteria	Bacteroidetes	Ignavibacteria	SJA-28	uncultured Chlorobi bacterium	uncultured Chlorobi bacterium	uncultured Chlorobi bacterium
AB602506.1.1504	B1588_uncultured Rubrobacteraceae bacterium	14	1.95591e-05	1.11022e-16	-0.322977	#N/A	Peripheral	Bacteria	Actinobacteria	Thermoleophilia	Gaiellales	uncultured	uncultured Rubrobacteraceae bacterium	uncultured Rubrobacteraceae bacterium
AB930629.1.1458	B8629_Methylocaldum	14	1.94821e-07	0.244898	-0.727334	#N/A	Peripheral	Bacteria	Proteobacteria	Gammaproteobacteria	Methylococcales	Methylococcaceae	Methylocaldum	uncultured bacterium
AJ390458.1.1363	B883_uncultured soil bacterium PBS-III-30	14	0.000210937	1.11022e-16	-0.322977	#N/A	Peripheral	Bacteria	Latescibacteria	uncultured soil bacterium PBS-III-30	uncultured soil bacterium PBS-III-30	uncultured soil bacterium PBS-III-30	uncultured soil bacterium PBS-III-30	uncultured soil bacterium PBS-III-30
AM162484.1.1488	B594_metagenome	14	0	1.11022e-16	-0.540606	#N/A	Peripheral	Bacteria	Bacteroidetes	Bacteroidia	Sphingobacteriales	Lentimicrobiaceae	metagenome	metagenome
DQ404796.1.1494	B4424_uncultured bacterium	14	6.94412e-07	0.244898	-0.727334	#N/A	Peripheral	Bacteria	Armatimonadetes	uncultured	uncultured bacterium	uncultured bacterium	uncultured bacterium	uncultured bacterium
EF019725.1.1406	B3163_o_MBNT15	14	0.000134295	1.11022e-16	-0.322977	#N/A	Peripheral	Bacteria	Proteobacteria	Deltaproteobacteria	MBNT15	#N/A	#N/A	#N/A
EF019770.1.1379	B9360_Chryseolinea	14	5.38104e-07	1.11022e-16	-0.742211	#N/A	Peripheral	Bacteria	Bacteroidetes	Bacteroidia	Cytophagales	Microscillaceae	Chryseolinea	metagenome
f3113eac932ef4f2759faee6f138ad46	B10055_Nostoc PCC-7107	14	5.17832e-08	0.132653	-0.770869	#N/A	Peripheral	Bacteria	Cyanobacteria	Oxyphotobacteria	Nostocales	Nostocaceae	Nostoc PCC-7107	#N/A
FJ466376.1.1455	B1379_f_TRA3-20	14	0.000120176	0.132653	-0.406982	#N/A	Peripheral	Bacteria	Proteobacteria	Gammaproteobacteria	Betaproteobacteriales	TRA3-20	#N/A	#N/A
FJ538114.1.1488	B1099_JGI 0001001-H03	14	3.5578e-05	1.11022e-16	-0.322977	#N/A	Peripheral	Bacteria	Acidobacteria	Blastocatellia (Subgroup 4)	Blastocatellales	Blastocatellaceae	JGI 0001001-H03	uncultured Acidobacterium sp.
FM204996.1.1431	B1161_Clostridium sensu stricto 12	14	7.39675e-05	0.132653	-0.406982	#N/A	Peripheral	Bacteria	Firmicutes	Clostridia	Clostridiales	Clostridiaceae 1	Clostridium sensu stricto 12	uncultured bacterium SJA-65
HM240922.1.1307	B30_Sphingomonas	14	0.000361944	1.11022e-16	-0.322977	#N/A	Peripheral	Bacteria	Proteobacteria	Alphaproteobacteria	Sphingomonadales	Sphingomonadaceae	Sphingomonas	#N/A
HM270648.1.1367	B341_Gaiella	14	0.000676797	1.11022e-16	-0.322977	#N/A	Peripheral	Bacteria	Actinobacteria	Thermoleophilia	Gaiellales	Gaiellaceae	Gaiella	uncultured actinobacterium
HM445360.1.1387	B1812_uncultured soil bacterium	14	2.81515e-07	1.11022e-16	-0.742211	#N/A	Peripheral	Bacteria	Rokubacteria	NC10	Rokubacteriales	uncultured soil bacterium	uncultured soil bacterium	uncultured soil bacterium
JF775642.1.1486	B813_metagenome	14	1.60808e-08	1.11022e-16	-0.491265	#N/A	Peripheral	Bacteria	Bacteroidetes	Bacteroidia	Sphingobacteriales	Lentimicrobiaceae	metagenome	metagenome
JX225584.1.1384	B385_uncultured	14	0.000250435	1.11022e-16	-0.322977	#N/A	Peripheral	Bacteria	Proteobacteria	Deltaproteobacteria	Desulfobacterales	Desulfobulbaceae	uncultured	uncultured prokaryote
KC290424.1.1571	B549_uncultured soil bacterium	14	7.71363e-09	1.11022e-16	-0.516018	#N/A	Peripheral	Bacteria	Bacteroidetes	Ignavibacteria	Kryptoniales	BSV26	uncultured soil bacterium	uncultured soil bacterium
KM200738.1.1486	B4261_f_Ilumatobacteraceae	14	0	0.132653	-0.699228	#N/A	Peripheral	Bacteria	Actinobacteria	Acidimicrobiia	Microtrichales	Ilumatobacteraceae	#N/A	#N/A
KX504792.1.1532	B254_Sh765B-TzT-35	14	0.000394035	0.540816	1.14508	#N/A	Peripheral	Bacteria	Rokubacteria	NC10	Methylomirabilales	Methylomirabilaceae	Sh765B-TzT-35	uncultured soil bacterium
351b5c8476da0e24612f94d711b8e3e7	F933_Mortierella	14	0.000717195	1.11022e-16	-0.322977	#N/A	Peripheral	Fungi	Mortierellomycota	Mortierellomycetes	Mortierellales	Mortierellaceae	Mortierella	unidentified
655e4aa48d74f89d6efe3478f5459251	F890_o_NA	14	0.000341958	1.11022e-16	-0.322977	#N/A	Peripheral	Fungi	#N/A	#N/A	#N/A	#N/A	#N/A	#N/A
70dc5e243ef64b403b219befd8ea6bac	F2631_unidentified	14	0.000102134	1.11022e-16	-0.322977	#N/A	Peripheral	Fungi	unidentified	unidentified	unidentified	unidentified	unidentified	unidentified
811c6f3d60eac33f1709ff9aaf2a51b2	F3921_unidentified	14	0	0.132653	-0.699228	#N/A	Peripheral	Fungi	unidentified	unidentified	unidentified	unidentified	unidentified	unidentified
c32ff061ff2ddc8b4064b52ceb11d70d	F313_unidentified	14	4.0016e-08	1.11022e-16	-0.499973	#N/A	Peripheral	Fungi	Rozellomycota	unidentified	unidentified	unidentified	unidentified	unidentified
d142c96db5ee21a2c2a8b5aa5eb39104	F3373_o_NA	14	3.89059e-07	0.132653	-0.770869	#N/A	Peripheral	Fungi	#N/A	#N/A	#N/A	#N/A	#N/A	#N/A
EU155999.1.1471	A97_uncultured archaeon	13	0	0	-0.553176	#N/A	Peripheral	Archaea	Thaumarchaeota	SCGC AB-179-E04	uncultured archaeon	uncultured archaeon	uncultured archaeon	uncultured archaeon
13e5508273ef0ba1b9ffc7f754ff694e	B574_uncultured bacterium	13	0.00068144	0.142012	-0.490986	#N/A	Peripheral	Bacteria	TA06	uncultured bacterium	uncultured bacterium	uncultured bacterium	uncultured bacterium	uncultured bacterium
3eec8212aeed08b99f7d1e7a63e8a525	B5840_uncultured soil bacterium	13	6.77989e-06	0	-0.406982	#N/A	Peripheral	Bacteria	Latescibacteria	uncultured soil bacterium	uncultured soil bacterium	uncultured soil bacterium	uncultured soil bacterium	uncultured soil bacterium
3f685624778b294642ff5ece88a5ec2c	B991_uncultured bacterium	13	1.59117e-05	0	-0.406982	#N/A	Peripheral	Bacteria	Chloroflexi	Ktedonobacteria	C0119	uncultured bacterium	uncultured bacterium	uncultured bacterium
70b1771d26ec1d1e56236c7683609cc1	B1444_Aquicella	13	2.03034e-08	0	-0.536026	#N/A	Peripheral	Bacteria	Proteobacteria	Gammaproteobacteria	Diplorickettsiales	Diplorickettsiaceae	Aquicella	#N/A
817382e383a90d09558fd535ba3117f2	B1212_uncultured bacterium	13	0	0	-0.536026	#N/A	Peripheral	Bacteria	Gemmatimonadetes	S0134 terrestrial group	uncultured bacterium	uncultured bacterium	uncultured bacterium	uncultured bacterium
bf68d2be564ca6b886743a9dc02781cc	B875_uncultured bacterium	13	0.000548949	0.142012	-0.490986	#N/A	Peripheral	Bacteria	Chloroflexi	Anaerolineae	SBR1031	A4b	uncultured bacterium	uncultured bacterium
e83cfbbf8f6f23d2019c762210a21cad	B1825_uncultured soil bacterium	13	8.58438e-06	0	-0.406982	#N/A	Peripheral	Bacteria	TA06	uncultured soil bacterium	uncultured soil bacterium	uncultured soil bacterium	uncultured soil bacterium	uncultured soil bacterium
EF018430.1.1323	B1205_metagenome	13	0.000302668	0	-0.406982	#N/A	Peripheral	Bacteria	Chloroflexi	JG30-KF-CM66	metagenome	metagenome	metagenome	metagenome
EF516277.1.1264	B752_metagenome	13	0.000224927	0	-0.406982	#N/A	Peripheral	Bacteria	Bacteroidetes	Bacteroidia	Sphingobacteriales	AKYH767	metagenome	metagenome
EU937853.1.1522	B2466_uncultured prokaryote	13	0	0	-0.530229	#N/A	Peripheral	Bacteria	Nitrospinae	P9X2b3D02	uncultured prokaryote	uncultured prokaryote	uncultured prokaryote	uncultured prokaryote
FJ484765.1.1355	B842_uncultured soil bacterium PBS-II-37	13	0.000205624	0	-0.406982	#N/A	Peripheral	Bacteria	Planctomycetes	Pla3 lineage	uncultured soil bacterium PBS-II-37	uncultured soil bacterium PBS-II-37	uncultured soil bacterium PBS-II-37	uncultured soil bacterium PBS-II-37
FPLM01006560.16.1520	B2576_uncultured	13	1.09484e-08	0	-0.553176	#N/A	Peripheral	Bacteria	Actinobacteria	Acidimicrobiia	Microtrichales	Ilumatobacteraceae	uncultured	metagenome
FPLS01046190.8.1514	B6019_metagenome	13	0	0	-0.530229	#N/A	Peripheral	Bacteria	Actinobacteria	Thermoleophilia	Solirubrobacterales	67-14	metagenome	metagenome
GQ097496.1.1378	B2178_Haliangium	13	0	0	-0.553176	#N/A	Peripheral	Bacteria	Proteobacteria	Deltaproteobacteria	Myxococcales	Haliangiaceae	Haliangium	#N/A
KJ650758.1.1498	B2369_uncultured Actinomycetales bacterium	13	2.20746e-05	0	-0.406982	#N/A	Peripheral	Bacteria	Actinobacteria	Thermoleophilia	Gaiellales	uncultured	uncultured Actinomycetales bacterium	uncultured Actinomycetales bacterium
22dcd4872ceb473c9667312cff69cdbb	F3405_unidentified	13	7.54222e-09	0	-0.770869	#N/A	Peripheral	Fungi	unidentified	unidentified	unidentified	unidentified	unidentified	unidentified
2693fb6485ccd6918921d55aa803c40c	F6414_o_NA	13	1.51108e-06	0	-0.770869	#N/A	Peripheral	Fungi	Ascomycota	Sordariomycetes	#N/A	#N/A	#N/A	#N/A
4df642b9f9e1a4d804e3aff70c8d2e4b	F4184_o_NA	13	8.51384e-07	0	-0.536026	#N/A	Peripheral	Fungi	#N/A	#N/A	#N/A	#N/A	#N/A	#N/A
88ecbf35a6eb4106af0fed7125b72703	F343_unidentified	13	0.000763069	0	-0.406982	#N/A	Peripheral	Fungi	unidentified	unidentified	unidentified	unidentified	unidentified	unidentified
89f10c2501f3545c6d0b341d30f1da77	F2949_unidentified	13	6.93357e-06	0	-0.406982	#N/A	Peripheral	Fungi	Basidiomycota	Agaricomycetes	Trechisporales	unidentified	unidentified	unidentified
af67556a3b8802d20c50badffec5ce29	F1299_unidentified	13	0.000428074	0	-0.406982	#N/A	Peripheral	Fungi	unidentified	unidentified	unidentified	unidentified	unidentified	unidentified
fdce7ca38776f8027a06d6796d55604b	F1913_o_NA	13	5.95672e-08	0	-0.548108	#N/A	Peripheral	Fungi	#N/A	#N/A	#N/A	#N/A	#N/A	#N/A
9a5114b0318254e2794027973442f276	A358_o_NA	12	4.66183e-05	0	-0.490986	#N/A	Peripheral	Archaea	Nanoarchaeaeota	Woesearchaeia	#N/A	#N/A	#N/A	#N/A
1e55b271c985b2ec6caf58ae2c42e603	B1015_Bryobacter	12	0.000137284	0	-0.490986	#N/A	Peripheral	Bacteria	Acidobacteria	Acidobacteriia	Solibacterales	Solibacteraceae (Subgroup 3)	Bryobacter	uncultured soil bacterium
27d8b0f6e2be21493d2fb291d6dd2869	B3652_o_NA	12	5.55617e-08	0	-0.799527	#N/A	Peripheral	Bacteria	#N/A	#N/A	#N/A	#N/A	#N/A	#N/A
39370f1a2ef05f62f9ffde092bdaacf5	B12612_o_NA	12	0	0	-0.799527	#N/A	Peripheral	Bacteria	Elusimicrobia	Lineage IIa	#N/A	#N/A	#N/A	#N/A
42ca735df63c44e98254e90f4014cccf	B376_uncultured Dehalogenimonas sp.	12	0.000300115	0	-0.490986	#N/A	Peripheral	Bacteria	Chloroflexi	SHA-26	uncultured Dehalogenimonas sp.	uncultured Dehalogenimonas sp.	uncultured Dehalogenimonas sp.	uncultured Dehalogenimonas sp.
49badbc58a23035f0841b1c3e782d037	B3581_f_WD2101 soil group	12	0	0	-0.580198	#N/A	Peripheral	Bacteria	Planctomycetes	Phycisphaerae	Tepidisphaerales	WD2101 soil group	#N/A	#N/A
618452703f32625679be7c278eceaba3	B3504_metagenome	12	1.16117e-05	0	-0.490986	#N/A	Peripheral	Bacteria	Latescibacteria	Latescibacteria	Latescibacterales	Latescibacteraceae	metagenome	metagenome
9a3f92468b6f8beaef9c51dc3aab372c	B7823_Aquicella	12	7.80229e-09	0.152778	-0.755441	#N/A	Peripheral	Bacteria	Proteobacteria	Gammaproteobacteria	Diplorickettsiales	Diplorickettsiaceae	Aquicella	uncultured bacterium
AM162430.1.1502	B3286_uncultured bacterium	12	0	0.152778	-0.755441	#N/A	Peripheral	Bacteria	Acidobacteria	Holophagae	Holophagales	Holophagaceae	uncultured bacterium	uncultured bacterium
AY922170.1.1343	B1419_Chloroflexi bacterium JEA33	12	0.00010738	0.486111	-0.911008	#N/A	Peripheral	Bacteria	Chloroflexi	TK10	Chloroflexi bacterium JEA33	Chloroflexi bacterium JEA33	Chloroflexi bacterium JEA33	Chloroflexi bacterium JEA33
d6c2ea6f7c12373d2b41670568e17d48	B4924_uncultured archaeon	12	0	0	-0.572079	#N/A	Peripheral	Bacteria	Chloroflexi	Anaerolineae	Ardenticatenales	uncultured	uncultured archaeon	uncultured archaeon
ddc276f11f9b598b776915c9e482c294	B3978_uncultured	12	9.17297e-09	0	-0.606384	#N/A	Peripheral	Bacteria	Chloroflexi	Anaerolineae	Anaerolineales	Anaerolineaceae	uncultured	#N/A
DQ067033.1.1414	B6602_uncultured	12	4.82936e-08	0	-0.606384	#N/A	Peripheral	Bacteria	Proteobacteria	Deltaproteobacteria	Myxococcales	Sandaracinaceae	uncultured	uncultured bacterium
ebbbd72e70cefb93cbe7f75a1fa0419f	B460_RBG-16-58-14	12	0.000183256	0	-0.490986	#N/A	Peripheral	Bacteria	Chloroflexi	Anaerolineae	Anaerolineales	Anaerolineaceae	RBG-16-58-14	uncultured bacterium
EF203188.1.1518	B660_uncultured bacterium	12	6.60473e-05	0	-0.490986	#N/A	Peripheral	Bacteria	Zixibacteria	uncultured bacterium	uncultured bacterium	uncultured bacterium	uncultured bacterium	uncultured bacterium
f1ad3820683d59bf736fa607a1ff7d84	B724_uncultured bacterium	12	2.48451e-05	0	-0.490986	#N/A	Peripheral	Bacteria	Chloroflexi	Anaerolineae	SBR1031	uncultured bacterium	uncultured bacterium	uncultured bacterium
FJ517047.1.1484	B817_uncultured soil bacterium	12	0.000344803	0	-0.490986	#N/A	Peripheral	Bacteria	Bacteroidetes	Bacteroidia	Sphingobacteriales	Lentimicrobiaceae	uncultured soil bacterium	uncultured soil bacterium
HQ003551.1.1527	B188_Syntrophus	12	0.00186962	0	-0.490986	#N/A	Peripheral	Bacteria	Proteobacteria	Deltaproteobacteria	Syntrophobacterales	Syntrophaceae	Syntrophus	uncultured Syntrophaceae bacterium
JQ428072.1.1444	B8810_Sphingomonas	12	0	0.152778	-0.592659	#N/A	Peripheral	Bacteria	Proteobacteria	Alphaproteobacteria	Sphingomonadales	Sphingomonadaceae	Sphingomonas	uncultured endolithic bacterium
JX505306.1.1444	B748_Pirellula	12	0.000225463	0	-0.490986	#N/A	Peripheral	Bacteria	Planctomycetes	Planctomycetacia	Pirellulales	Pirellulaceae	Pirellula	uncultured Pirellula sp.
KF793041.1.1450	B10163_Burkholderia-Caballeronia-Paraburkholderia	12	1.17034e-08	0	-0.588464	#N/A	Peripheral	Bacteria	Proteobacteria	Gammaproteobacteria	Betaproteobacteriales	Burkholderiaceae	Burkholderia-Caballeronia-Paraburkholderia	#N/A
KR559983.1.1419	B2339_Reyranella	12	1.3356e-08	0	-0.588464	#N/A	Peripheral	Bacteria	Proteobacteria	Alphaproteobacteria	Reyranellales	Reyranellaceae	Reyranella	#N/A
KX009023.1.1436	B940_Hymenobacter	12	5.55468e-05	0	-0.490986	#N/A	Peripheral	Bacteria	Bacteroidetes	Bacteroidia	Cytophagales	Hymenobacteraceae	Hymenobacter	#N/A
0abbce58261d7fd0022933a864da40ee	F2730_unidentified	12	5.4391e-08	0	-0.490986	#N/A	Peripheral	Fungi	unidentified	unidentified	unidentified	unidentified	unidentified	unidentified
694952111dd71cc064804394bc9e0310	F8_unidentified	12	0.000294329	0	-0.490986	#N/A	Peripheral	Fungi	unidentified	unidentified	unidentified	unidentified	unidentified	unidentified
ed5ec5a1436914c3e5749646807e8f65	F2018_unidentified	12	7.45823e-05	0.375	-0.742999	#N/A	Peripheral	Fungi	unidentified	unidentified	unidentified	unidentified	unidentified	unidentified
ef8881e336f7533556e4361b8a8cf1b6	F4902_unidentified	12	1.71385e-06	0.152778	-0.57499	#N/A	Peripheral	Fungi	unidentified	unidentified	unidentified	unidentified	unidentified	unidentified
fcb15b8dcb0bb7a14dfb6cf1c3c512a3	F1217_o_NA	12	0	0	-0.580198	#N/A	Peripheral	Fungi	Ascomycota	Sordariomycetes	#N/A	#N/A	#N/A	#N/A
1054e4a54e223fa086da70619047b0d2	B1219_uncultured bacterium	11	0.000195748	0	-0.57499	#N/A	Peripheral	Bacteria	Proteobacteria	Deltaproteobacteria	Myxococcales	BIrii41	uncultured bacterium	uncultured bacterium
1698a32c152277c3b92f3435f3ae94a0	B1194_uncultured	11	2.97719e-09	0.297521	-0.788293	#N/A	Peripheral	Bacteria	Chloroflexi	Anaerolineae	Anaerolineales	Anaerolineaceae	uncultured	#N/A
1941541836f030ce305c26ce6d6f7376	B10088_Bdellovibrio	11	0	0.165289	-0.632044	#N/A	Peripheral	Bacteria	Proteobacteria	Deltaproteobacteria	Bdellovibrionales	Bdellovibrionaceae	Bdellovibrio	#N/A
4dfae1ac44fc7f2c249262c6230a0d5d	B579_uncultured bacterium	11	0.000292874	0	-0.57499	#N/A	Peripheral	Bacteria	Chloroflexi	Dehalococcoidia	vadinBA26	uncultured bacterium	uncultured bacterium	uncultured bacterium
6f52858dad0644f846675f0f7cdb49da	B2408_uncultured soil bacterium PBS-III-30	11	0.000157972	0.396694	-0.827004	#N/A	Peripheral	Bacteria	Latescibacteria	uncultured soil bacterium PBS-III-30	uncultured soil bacterium PBS-III-30	uncultured soil bacterium PBS-III-30	uncultured soil bacterium PBS-III-30	uncultured soil bacterium PBS-III-30
771a68356b66a60380e5d44a2052cc89	B9402_Chloronema	11	0	0	-0.612287	#N/A	Peripheral	Bacteria	Chloroflexi	Chloroflexia	Chloroflexales	Chloroflexaceae	Chloronema	#N/A
7cd0fcc96e97bcf57cfdd6bb86889088	B4096_metagenome	11	3.21314e-05	0	-0.57499	#N/A	Peripheral	Bacteria	Proteobacteria	Deltaproteobacteria	Myxococcales	Blfdi19	metagenome	metagenome
91276c5b0777e6249d0daa0ef058bf60	B11605_Bdellovibrio	11	0	0.297521	-0.788293	#N/A	Peripheral	Bacteria	Proteobacteria	Deltaproteobacteria	Bdellovibrionales	Bdellovibrionaceae	Bdellovibrio	#N/A
AB240382.1.1521	B932_uncultured	11	3.52398e-05	0.297521	-0.742999	#N/A	Peripheral	Bacteria	Proteobacteria	Deltaproteobacteria	Syntrophobacterales	Syntrophobacteraceae	uncultured	uncultured Syntrophaceae bacterium
AB488282.1.1368	B1504_Hydrogenispora	11	0.000113265	0	-0.57499	#N/A	Peripheral	Bacteria	Firmicutes	Clostridia	Clostridiales	Heliobacteriaceae	Hydrogenispora	uncultured Firmicutes bacterium
AB714001.1.1404	B1584_f_Lachnospiraceae	11	0.000139141	0	-0.57499	#N/A	Peripheral	Bacteria	Firmicutes	Clostridia	Clostridiales	Lachnospiraceae	#N/A	#N/A
b2b492b4879a50a5fd45ab09059c6809	B3675_uncultured bacterium	11	1.18328e-05	0	-0.57499	#N/A	Peripheral	Bacteria	Latescibacteria	uncultured bacterium	uncultured bacterium	uncultured bacterium	uncultured bacterium	uncultured bacterium
c8e9aa700e3fd272bde04eb3ceef36b0	B9940_Haliangium	11	0	0.165289	-0.632044	#N/A	Peripheral	Bacteria	Proteobacteria	Deltaproteobacteria	Myxococcales	Haliangiaceae	Haliangium	#N/A
c9292b7890aa3f62df8387391c3a638a	B10476_Desulfatiglans	11	7.37826e-09	0	-0.608158	#N/A	Peripheral	Bacteria	Proteobacteria	Deltaproteobacteria	Desulfarculales	Desulfarculaceae	Desulfatiglans	#N/A
d5c266424d3da4f779dad55d0a60c921	B1316_Subgroup 10	11	2.40022e-08	0	-0.608158	#N/A	Peripheral	Bacteria	Acidobacteria	Thermoanaerobaculia	Thermoanaerobaculales	Thermoanaerobaculaceae	Subgroup 10	uncultured prokaryote
DQ138963.1.1519	B461_uncultured bacterium	11	5.354e-05	0.165289	-0.658995	#N/A	Peripheral	Bacteria	Nitrospirae	4-29-1	uncultured bacterium	uncultured bacterium	uncultured bacterium	uncultured bacterium
DQ413121.1.1404	B1201_o_RBG-13-54-9	11	0.000111293	0	-0.57499	#N/A	Peripheral	Bacteria	Chloroflexi	Anaerolineae	RBG-13-54-9	#N/A	#N/A	#N/A
DQ811810.1.1515	B6955_uncultured delta proteobacterium	11	5.2306e-08	0.165289	-0.632044	#N/A	Peripheral	Bacteria	Proteobacteria	Deltaproteobacteria	Myxococcales	UASB-TL25	uncultured delta proteobacterium	uncultured delta proteobacterium
e25ea2ba28be5f3ffc918cdeb1dc16d2	B6743_Geothrix	11	0	0	-0.639274	#N/A	Peripheral	Bacteria	Acidobacteria	Holophagae	Holophagales	Holophagaceae	Geothrix	#N/A
EU474817.1.1376	B2670_Clostridium sensu stricto 1	11	0	0.297521	-0.788293	#N/A	Peripheral	Bacteria	Firmicutes	Clostridia	Clostridiales	Clostridiaceae 1	Clostridium sensu stricto 1	#N/A
EU580501.1.1486	B5909_Pedobacter	11	0	0	-0.57499	#N/A	Peripheral	Bacteria	Bacteroidetes	Bacteroidia	Sphingobacteriales	Sphingobacteriaceae	Pedobacter	#N/A
HQ597829.1.1474	B999_uncultured Acidobacteria bacterium	11	0.000202467	0	-0.57499	#N/A	Peripheral	Bacteria	Acidobacteria	Subgroup 11	uncultured Acidobacteria bacterium	uncultured Acidobacteria bacterium	uncultured Acidobacteria bacterium	uncultured Acidobacteria bacterium
KJ128030.1.1457	B5698_uncultured Anaerolineaceae bacterium	11	2.54493e-05	0	-0.57499	#N/A	Peripheral	Bacteria	Chloroflexi	Anaerolineae	SBR1031	A4b	uncultured Anaerolineaceae bacterium	uncultured Anaerolineaceae bacterium
KJ782244.1.1479	B5356_uncultured	11	8.48499e-09	0	-0.828185	#N/A	Peripheral	Bacteria	Gemmatimonadetes	Gemmatimonadetes	Gemmatimonadales	Gemmatimonadaceae	uncultured	uncultured Nitrospira sp.
013c5447f5505b20e9e949c5922f8fce	F1469_unidentified	11	7.54222e-08	0	-0.57499	#N/A	Peripheral	Fungi	unidentified	unidentified	unidentified	unidentified	unidentified	unidentified
48a6cf8853eb0a8f48f26bbafe44f94b	F951_o_NA	11	0.000785028	0.46281	-0.867865	#N/A	Peripheral	Fungi	#N/A	#N/A	#N/A	#N/A	#N/A	#N/A
821bfd693e1df6e68c1af719c858e18e	F3799_o_NA	11	0	0.165289	-0.658995	#N/A	Peripheral	Fungi	#N/A	#N/A	#N/A	#N/A	#N/A	#N/A
cd48264ff30699a0a3c0b1a737dd6310	F428_Mortierella	11	0.000152534	0	-0.57499	#N/A	Peripheral	Fungi	Mortierellomycota	Mortierellomycetes	Mortierellales	Mortierellaceae	Mortierella	Mortierella_zonata
e7795e9b22b488ea8e2faa5ecc859170	F5465_o_NA	11	2.5344e-08	0	-0.608132	#N/A	Peripheral	Fungi	#N/A	#N/A	#N/A	#N/A	#N/A	#N/A
SH103073.07FU_EU307970_refs	F185_Cyberlindnera	11	7.37077e-05	0	-0.57499	#N/A	Peripheral	Fungi	Ascomycota	Saccharomycetes	Saccharomycetales	Phaffomycetaceae	Cyberlindnera	Cyberlindnera_saturnus
SH176536.07FU_JF770450_refs	F741_Cladosporium	11	7.89302e-09	0	-0.623752	#N/A	Peripheral	Fungi	Ascomycota	Dothideomycetes	Capnodiales	Cladosporiaceae	Cladosporium	Cladosporium_grevilleae
c9f3d285f6ab9c3942aa313519a1c1c3	A1026_uncultured archaeon	10	0	0	-0.644377	#N/A	Peripheral	Archaea	Nanoarchaeaeota	Woesearchaeia	uncultured archaeon	uncultured archaeon	uncultured archaeon	uncultured archaeon
fe090d3bf307b096f42a485757993f90	A1136_uncultured euryarchaeote	10	0	0	-0.65904	#N/A	Peripheral	Archaea	Nanoarchaeaeota	Woesearchaeia	uncultured euryarchaeote	uncultured euryarchaeote	uncultured euryarchaeote	uncultured euryarchaeote
185650bb6eb359b18539b5f88bd1c3f1	B1018_o_NA	10	9.6212e-06	0	-0.658995	#N/A	Peripheral	Bacteria	Chloroflexi	Dehalococcoidia	#N/A	#N/A	#N/A	#N/A
1e2eeba70654a605cf3d3a41a4c524f2	B4189_uncultured bacterium	10	0	0	-0.644377	#N/A	Peripheral	Bacteria	Chloroflexi	Anaerolineae	SBR1031	A4b	uncultured bacterium	uncultured bacterium
217e5c301cdd4a4c0738cb0b8fea4281	B5755_Candidatus Methylospira	10	0	0	-0.644185	#N/A	Peripheral	Bacteria	Proteobacteria	Gammaproteobacteria	Methylococcales	Methylococcaceae	Candidatus Methylospira	Methylococcaceae bacterium 73a
46ed62749b5180dbab77a63ecab54993	B5213_o_NA	10	6.97827e-06	0	-0.658995	#N/A	Peripheral	Bacteria	Chloroflexi	#N/A	#N/A	#N/A	#N/A	#N/A
4c5701039ebee0fddb5a4541d5b67e32	B1230_Phenylobacterium	10	0.000256973	0.18	-0.742999	#N/A	Peripheral	Bacteria	Proteobacteria	Alphaproteobacteria	Caulobacterales	Caulobacteraceae	Phenylobacterium	unidentified
4c94197586d877cf97beab3f88f72ee4	B3426_uncultured Acidobacterium sp.	10	1.45471e-05	0	-0.658995	#N/A	Peripheral	Bacteria	Acidobacteria	Subgroup 11	uncultured Acidobacterium sp.	uncultured Acidobacterium sp.	uncultured Acidobacterium sp.	uncultured Acidobacterium sp.
69ffdc00b22373de552c7d81fb1fc40a	B11255_f_Polyangiaceae	10	0	0	-0.644185	#N/A	Peripheral	Bacteria	Proteobacteria	Deltaproteobacteria	Myxococcales	Polyangiaceae	#N/A	#N/A
7ad0b378c55d65231e7838fcb762e1bf	B1409_uncultured Dehalogenimonas sp.	10	3.86147e-05	0.18	-0.742999	#N/A	Peripheral	Bacteria	Chloroflexi	SHA-26	uncultured Dehalogenimonas sp.	uncultured Dehalogenimonas sp.	uncultured Dehalogenimonas sp.	uncultured Dehalogenimonas sp.
879df4da418e038411db437b209f0a42	B1717_o_NA	10	2.09148e-05	0	-0.658995	#N/A	Peripheral	Bacteria	Actinobacteria	MB-A2-108	#N/A	#N/A	#N/A	#N/A
893fcaaa34b3fb7f9a24a42cb8118ae7	B1009_uncultured bacterium	10	0.000335535	0	-0.658995	#N/A	Peripheral	Bacteria	Chloroflexi	SHA-26	uncultured bacterium	uncultured bacterium	uncultured bacterium	uncultured bacterium
9ba358907b68eec87885fd2b8af646cd	B5688_f_WD2101 soil group	10	0	0	-0.644185	#N/A	Peripheral	Bacteria	Planctomycetes	Phycisphaerae	Tepidisphaerales	WD2101 soil group	#N/A	#N/A
AB487531.1.1320	B441_Hydrogenispora	10	1.46156e-05	0.18	-0.742999	#N/A	Peripheral	Bacteria	Firmicutes	Clostridia	Clostridiales	Heliobacteriaceae	Hydrogenispora	uncultured Firmicutes bacterium
AB488372.1.1407	B5071_uncultured bacterium	10	3.87515e-05	0	-0.658995	#N/A	Peripheral	Bacteria	Fibrobacteres	Fibrobacteria	Fibrobacterales	B122	uncultured bacterium	uncultured bacterium
AF351220.1.1480	B3061_Syntrophus	10	0	0	-0.672163	#N/A	Peripheral	Bacteria	Proteobacteria	Deltaproteobacteria	Syntrophobacterales	Syntrophaceae	Syntrophus	#N/A
AF524005.1.1260	B493_o_uncultured	10	0.000539746	0	-0.658995	#N/A	Peripheral	Bacteria	Nitrospirae	Thermodesulfovibrionia	uncultured	#N/A	#N/A	#N/A
AF527587.1.1437	B5903_Defluviicoccus	10	1.00641e-06	0	-0.658995	#N/A	Peripheral	Bacteria	Proteobacteria	Alphaproteobacteria	Rhodospirillales	Rhodopirillaceae	Defluviicoccus	#N/A
AY921985.1.1406	B10800_o_NA	10	0	0	-0.856843	#N/A	Peripheral	Bacteria	Acidobacteria	Subgroup 6	#N/A	#N/A	#N/A	#N/A
c9da507a26249cbf055e59b059a1ddc9	B10558_o_Sphingobacteriales	10	2.26888e-08	0	-0.856843	#N/A	Peripheral	Bacteria	Bacteroidetes	Bacteroidia	Sphingobacteriales	#N/A	#N/A	#N/A
CP001287.2484826.2486304	B2747_Cyanothece PCC-8801	10	9.72212e-05	0	-0.658995	#N/A	Peripheral	Bacteria	Cyanobacteria	Oxyphotobacteria	Nostocales	Microcystaceae	Cyanothece PCC-8801	Cyanothece sp. PCC 8801
EU132411.1.1381	B2483_uncultured Acidobacteriales bacterium	10	1.54273e-08	0	-0.647123	#N/A	Peripheral	Bacteria	Acidobacteria	Blastocatellia (Subgroup 4)	11-24	uncultured Acidobacteriales bacterium	uncultured Acidobacteriales bacterium	uncultured Acidobacteriales bacterium
EU266820.1.1502	B3215_uncultured	10	0	0	-0.644185	#N/A	Peripheral	Bacteria	Acidobacteria	Holophagae	Holophagales	Holophagaceae	uncultured	#N/A
EU644228.1.1444	B3540_uncultured Bacteroidetes bacterium	10	2.16858e-08	0	-0.647123	#N/A	Peripheral	Bacteria	Bacteroidetes	Bacteroidia	Sphingobacteriales	AKYH767	uncultured Bacteroidetes bacterium	uncultured Bacteroidetes bacterium
f0e3e3c44afb9ce52487dd83b7962dbb	B1067_uncultured	10	0.000196495	0.46	0.704664	#N/A	Peripheral	Bacteria	Chloroflexi	Anaerolineae	Anaerolineales	Anaerolineaceae	uncultured	#N/A
FJ538159.1.1489	B1055_Acidothermus	10	4.52322e-05	0	-0.658995	#N/A	Peripheral	Bacteria	Actinobacteria	Actinobacteria	Frankiales	Acidothermaceae	Acidothermus	uncultured soil bacterium
FJ824047.1.1371	B1745_uncultured	10	5.16137e-06	0	-0.658995	#N/A	Peripheral	Bacteria	Planctomycetes	Planctomycetacia	Pirellulales	Pirellulaceae	uncultured	uncultured soil bacterium
FPLS01000185.11.1547	B7191_Haliangium	10	4.07715e-08	0	-0.644185	#N/A	Peripheral	Bacteria	Proteobacteria	Deltaproteobacteria	Myxococcales	Haliangiaceae	Haliangium	#N/A
FPLS01021268.15.1377	B2980_uncultured	10	0	0.18	-0.811653	#N/A	Peripheral	Bacteria	Chlamydiae	Chlamydiae	Chlamydiales	Parachlamydiaceae	uncultured	metagenome
GQ379558.1.1204	B11442_Pseudolabrys	10	0	0.18	-0.788293	#N/A	Peripheral	Bacteria	Proteobacteria	Alphaproteobacteria	Rhizobiales	Xanthobacteraceae	Pseudolabrys	#N/A
JX223787.1.1207	B2546_Desulfosporosinus	10	1.71414e-08	0	-0.644185	#N/A	Peripheral	Bacteria	Firmicutes	Clostridia	Clostridiales	Peptococcaceae	Desulfosporosinus	#N/A
JX505286.1.1472	B467_f_uncultured	10	8.48499e-09	0	-0.644377	#N/A	Peripheral	Bacteria	Actinobacteria	Thermoleophilia	Gaiellales	uncultured	#N/A	#N/A
KC431920.1.1377	B5405_f_Opitutaceae	10	1.43655e-05	0.18	-0.742999	#N/A	Peripheral	Bacteria	Verrucomicrobia	Verrucomicrobiae	Opitutales	Opitutaceae	#N/A	#N/A
KM021173.1.1262	B9587_Flavobacterium	10	0	0.18	-0.67143	#N/A	Peripheral	Bacteria	Bacteroidetes	Bacteroidia	Flavobacteriales	Flavobacteriaceae	Flavobacterium	#N/A
KU177252.1.1213	B1501_Allorhizobium-Neorhizobium-Pararhizobium-Rhizobium	10	0	0	-0.672163	#N/A	Peripheral	Bacteria	Proteobacteria	Alphaproteobacteria	Rhizobiales	Rhizobiaceae	Allorhizobium-Neorhizobium-Pararhizobium-Rhizobium	#N/A
KX239263.1.1244	B9589_Subgroup 10	10	0	0	-0.856843	#N/A	Peripheral	Bacteria	Acidobacteria	Thermoanaerobaculia	Thermoanaerobaculales	Thermoanaerobaculaceae	Subgroup 10	#N/A
18f9188ff121803e4645713f8d83b952	F162_unidentified	10	2.71475e-05	0	-0.658995	#N/A	Peripheral	Fungi	unidentified	unidentified	unidentified	unidentified	unidentified	unidentified
SH181879.07FU_AF444321_refs	F57_Saitozyma	10	5.35131e-05	0.18	-0.742999	#N/A	Peripheral	Fungi	Basidiomycota	Tremellomycetes	Tremellales	Trimorphomycetaceae	Saitozyma	Saitozyma_podzolica
SH193004.07FU_FJ438387_reps	F2848_Strelitziana	10	0	0	-0.672163	#N/A	Peripheral	Fungi	Ascomycota	Eurotiomycetes	Chaetothyriales	Chaetothyriales_fam_Incertae_sedis	Strelitziana	Strelitziana_albiziae
1ad45f1b3be8ef52ebb4b1e3289eaf50	B11568_uncultured bacterium	9	0	0	-0.680239	#N/A	Peripheral	Bacteria	Fibrobacteres	Fibrobacteria	Fibrobacterales	possible family 01	uncultured bacterium	uncultured bacterium
28cdf1739d5b321d3c2db9a77ed58e61	B8761_uncultured bacterium	9	1.94821e-07	0.345679	-0.867865	#N/A	Peripheral	Bacteria	Chloroflexi	Anaerolineae	SBR1031	A4b	uncultured bacterium	uncultured bacterium
3dd3e8bb43000af1694ce9157bb1f8df	B9142_uncultured	9	0	0	-0.676467	#N/A	Peripheral	Bacteria	Proteobacteria	Deltaproteobacteria	Myxococcales	Sandaracinaceae	uncultured	#N/A
486f3e706b350a644fc1b7646e7d0078	B10613_Chloronema	9	7.89302e-09	0	-0.680239	#N/A	Peripheral	Bacteria	Chloroflexi	Chloroflexia	Chloroflexales	Chloroflexaceae	Chloronema	#N/A
57b6fdb5aed2fca4f1dc07f488bd3c16	B9081_uncultured bacterium	9	0	0	-0.676467	#N/A	Peripheral	Bacteria	Chloroflexi	Dehalococcoidia	S085	uncultured bacterium	uncultured bacterium	uncultured bacterium
6df3761129b8735e3352fc718fbeacac	B1670_uncultured bacterium	9	0	0.197531	-0.816764	#N/A	Peripheral	Bacteria	Chloroflexi	SHA-26	uncultured bacterium	uncultured bacterium	uncultured bacterium	uncultured bacterium
7d54c89fd77e6ff156ef309abc9627c4	B1589_uncultured Desulfuromonadales bacterium	9	2.17269e-05	0	-0.742999	#N/A	Peripheral	Bacteria	Proteobacteria	Deltaproteobacteria	PB19	uncultured Desulfuromonadales bacterium	uncultured Desulfuromonadales bacterium	uncultured Desulfuromonadales bacterium
9340e1db262dbd32e9ac9a945fa08cc9	B5735_Paenibacillus	9	1.19806e-05	0.197531	-0.716292	#N/A	Peripheral	Bacteria	Firmicutes	Bacilli	Bacillales	Paenibacillaceae	Paenibacillus	#N/A
AB487608.1.1356	B4561_uncultured soil bacterium	9	0.000319603	0.567901	-0.176166	#N/A	Peripheral	Bacteria	Acidobacteria	Subgroup 21	uncultured soil bacterium	uncultured soil bacterium	uncultured soil bacterium	uncultured soil bacterium
AB672113.1.1476	B10367_Geobacter	9	0	0.197531	-0.710815	#N/A	Peripheral	Bacteria	Proteobacteria	Deltaproteobacteria	Desulfuromonadales	Geobacteraceae	Geobacter	uncultured soil bacterium
ac5e128599d381176e9aafd5f02940dc	B2517_o_WCHB1-41	9	2.12041e-05	0.345679	-0.911008	#N/A	Peripheral	Bacteria	Kiritimatiellaeota	Kiritimatiellae	WCHB1-41	#N/A	#N/A	#N/A
af3e6dedece46499bf7666a7251957dd	B909_o_uncultured	9	0	0	-0.686088	#N/A	Peripheral	Bacteria	Nitrospirae	Thermodesulfovibrionia	uncultured	#N/A	#N/A	#N/A
AM935855.1.1316	B971_f_uncultured	9	8.88989e-06	0.197531	-0.827004	#N/A	Peripheral	Bacteria	Proteobacteria	Alphaproteobacteria	Elsterales	uncultured	#N/A	#N/A
b4f7343ca101b5b97851238b51c3b4ee	B2348_o_SBR1031	9	1.06422e-05	0	-0.742999	#N/A	Peripheral	Bacteria	Chloroflexi	Anaerolineae	SBR1031	#N/A	#N/A	#N/A
b501d5b0791e09acc304c7d3ca324575	B2768_anaerobic bacterium MO-CFX2	9	0.000117948	0	-0.742999	#N/A	Peripheral	Bacteria	Chloroflexi	Anaerolineae	SBR1031	anaerobic bacterium MO-CFX2	anaerobic bacterium MO-CFX2	anaerobic bacterium MO-CFX2
c31c1af323441ec69fcba3d251e57eb8	B684_o_NA	9	0.000437472	0	-0.742999	#N/A	Peripheral	Bacteria	Gemmatimonadetes	S0134 terrestrial group	#N/A	#N/A	#N/A	#N/A
DQ125722.1.1438	B3371_f_Ruminococcaceae	9	0	0	-0.705052	#N/A	Peripheral	Bacteria	Firmicutes	Clostridia	Clostridiales	Ruminococcaceae	#N/A	#N/A
e5ac36e7f1621f76a0b9bf78f3b04174	B4307_o_Sva0485	9	4.13932e-07	0.197531	-0.710815	#N/A	Peripheral	Bacteria	Proteobacteria	Deltaproteobacteria	Sva0485	#N/A	#N/A	#N/A
ed0a552c01b909c790d514f83f63620e	B1508_f_Pedosphaeraceae	9	0	0	-0.742999	#N/A	Peripheral	Bacteria	Verrucomicrobia	Verrucomicrobiae	Pedosphaerales	Pedosphaeraceae	#N/A	#N/A
EU134601.1.1387	B834_o_NA	9	0	0	-0.742999	#N/A	Peripheral	Bacteria	Elusimicrobia	Lineage IIa	#N/A	#N/A	#N/A	#N/A
EU135194.1.1257	B10211_uncultured Planctomyces sp.	9	0	0	-0.885501	#N/A	Peripheral	Bacteria	Planctomycetes	Planctomycetacia	Planctomycetales	uncultured	uncultured Planctomyces sp.	uncultured Planctomyces sp.
EU266884.1.1460	B1439_uncultured	9	0	0.197531	-0.839759	#N/A	Peripheral	Bacteria	Chloroflexi	Anaerolineae	Anaerolineales	Anaerolineaceae	uncultured	#N/A
f77a0f78614346255241410c80c2991e	B12161_Synechocystis BDHKU-20401	9	0	0.345679	-0.845235	#N/A	Peripheral	Bacteria	Cyanobacteria	Oxyphotobacteria	Nostocales	Microcystaceae	Synechocystis BDHKU-20401	uncultured cyanobacterium
fb69b4c4882d00992b36ee53f3027626	B8102_f_Nostocaceae	9	9.75266e-08	0.197531	-0.839759	#N/A	Peripheral	Bacteria	Cyanobacteria	Oxyphotobacteria	Nostocales	Nostocaceae	#N/A	#N/A
fc254e80a3644c836a67aba30a0a8745	B6064_uncultured bacterium	9	1.65561e-08	0	-0.676467	#N/A	Peripheral	Bacteria	Verrucomicrobia	Verrucomicrobiae	Pedosphaerales	Pedosphaeraceae	uncultured bacterium	uncultured bacterium
FM200996.1.1393	B5105_Cytophaga	9	6.32522e-06	0	-0.742999	#N/A	Peripheral	Bacteria	Bacteroidetes	Bacteroidia	Cytophagales	Cytophagaceae	Cytophaga	Hypsibius dujardini
FPLS01025218.13.1516	B1685_uncultured	9	0.000229314	0	-0.742999	#N/A	Peripheral	Bacteria	Bacteroidetes	Bacteroidia	Cytophagales	Microscillaceae	uncultured	#N/A
GQ402791.1.1444	B421_uncultured bacterium	9	0.000191453	0.197531	-0.827004	#N/A	Peripheral	Bacteria	Nitrospirae	Thermodesulfovibrionia	uncultured	uncultured bacterium	uncultured bacterium	uncultured bacterium
HG528998.1.1246	B6365_Hyphomicrobium	9	0	0	-0.705052	#N/A	Peripheral	Bacteria	Proteobacteria	Alphaproteobacteria	Rhizobiales	Hyphomicrobiaceae	Hyphomicrobium	#N/A
JF235717.1.1354	B10074_f_SC-I-84	9	0	0	-0.705052	#N/A	Peripheral	Bacteria	Proteobacteria	Gammaproteobacteria	Betaproteobacteriales	SC-I-84	#N/A	#N/A
JN038587.1.1459	B2346_uncultured prokaryote	9	4.29888e-05	0	-0.742999	#N/A	Peripheral	Bacteria	Chloroflexi	Anaerolineae	Ardenticatenales	uncultured	uncultured prokaryote	uncultured prokaryote
JQ978534.1.1483	B1324_Pirellula	9	0	0	-0.742999	#N/A	Peripheral	Bacteria	Planctomycetes	Planctomycetacia	Pirellulales	Pirellulaceae	Pirellula	agricultural soil bacterium SC-I-28
JX133392.1.1515	B465_Anaeromyxobacter	9	4.83735e-05	0	-0.742999	#N/A	Peripheral	Bacteria	Proteobacteria	Deltaproteobacteria	Myxococcales	Archangiaceae	Anaeromyxobacter	uncultured proteobacterium
KT290358.1.1516	B3707_Cuspidothrix LMECYA 163	9	0	0	-0.742999	#N/A	Peripheral	Bacteria	Cyanobacteria	Oxyphotobacteria	Nostocales	Nostocaceae	Cuspidothrix LMECYA 163	#N/A
KX752980.1.1497	B1824_bacterium Ellin6515	9	1.71138e-06	0	-0.742999	#N/A	Peripheral	Bacteria	Actinobacteria	Thermoleophilia	Gaiellales	uncultured	bacterium Ellin6515	bacterium Ellin6515
LC124691.1.1455	B1025_f_possible family 01	9	0.000128937	0	-0.742999	#N/A	Peripheral	Bacteria	Fibrobacteres	Fibrobacteria	Fibrobacterales	possible family 01	#N/A	#N/A
184a9f1b20742f0a51a9354d4ecc31e1	F856_unidentified	9	8.30902e-05	0	-0.742999	#N/A	Peripheral	Fungi	unidentified	unidentified	unidentified	unidentified	unidentified	unidentified
6341ea5b27f539b9ddbc794eade6713d	F1004_o_NA	9	0	0	-0.680239	#N/A	Peripheral	Fungi	#N/A	#N/A	#N/A	#N/A	#N/A	#N/A
67aeb91045c6450a3d5840becc022787	F6554_o_NA	9	0	0.197531	-0.839759	#N/A	Peripheral	Fungi	#N/A	#N/A	#N/A	#N/A	#N/A	#N/A
7fd44b06d212fe7a69829f6eda4a4776	F5067_o_NA	9	3.01475e-06	0.197531	-0.827004	#N/A	Peripheral	Fungi	#N/A	#N/A	#N/A	#N/A	#N/A	#N/A
8551efd482163a57b28785bb4108207d	F308_unidentified	9	0.000235491	0	-0.742999	#N/A	Peripheral	Fungi	unidentified	unidentified	unidentified	unidentified	unidentified	unidentified
a997fdc220e1061b013b9fee3ddd71ac	F2767_o_NA	9	2.45937e-06	0	-0.742999	#N/A	Peripheral	Fungi	#N/A	#N/A	#N/A	#N/A	#N/A	#N/A
ab0ca45eed305315e40c6c74f53a422d	F4237_Fusarium	9	0	0.197531	-0.710815	#N/A	Peripheral	Fungi	Ascomycota	Sordariomycetes	Hypocreales	Nectriaceae	Fusarium	Fusarium_solani
b073bc60b590a4c30279bf98a4c16800	F6718_o_NA	9	0	0.197531	-0.816764	#N/A	Peripheral	Fungi	#N/A	#N/A	#N/A	#N/A	#N/A	#N/A
SH174856.07FU_M96382_reps	F1104_unidentified	9	2.77844e-06	0	-0.742999	#N/A	Peripheral	Fungi	Ascomycota	Leotiomycetes	Helotiales	Sclerotiniaceae	unidentified	unidentified
SH195830.07FU_HM487057_reps	F1499_Zymoseptoria	9	0	0	-0.680239	#N/A	Peripheral	Fungi	Ascomycota	Dothideomycetes	Capnodiales	Mycosphaerellaceae	Zymoseptoria	unidentified
SH216872.07FU_HQ211831_reps	F6318_Neobulgaria	9	0	0.197531	-0.839759	#N/A	Peripheral	Fungi	Ascomycota	Leotiomycetes	Helotiales	Leotiaceae	Neobulgaria	unidentified
a9700b82315cf1bc6165af6662e3bff2	A1107_uncultured euryarchaeote	8	0	0	-0.725052	#N/A	Peripheral	Archaea	Nanoarchaeaeota	Woesearchaeia	uncultured euryarchaeote	uncultured euryarchaeote	uncultured euryarchaeote	uncultured euryarchaeote
045a4bce4efea51b1178f8a6d8f4f52c	B3503_uncultured soil bacterium	8	4.95114e-07	0	-0.716292	#N/A	Peripheral	Bacteria	Acidobacteria	Subgroup 25	uncultured soil bacterium	uncultured soil bacterium	uncultured soil bacterium	uncultured soil bacterium
0b7f8c12d0e3932e0013232460bc8ae1	B10851_uncultured	8	0	0.21875	-0.867865	#N/A	Peripheral	Bacteria	Proteobacteria	Deltaproteobacteria	Myxococcales	Sandaracinaceae	uncultured	uncultured Polyangiaceae bacterium
1dfd83715b4afec4e6f90237211dab40	B10330_uncultured Gemmatimonadetes bacterium	8	2.7152e-08	0.21875	-0.750201	#N/A	Peripheral	Bacteria	Gemmatimonadetes	S0134 terrestrial group	uncultured Gemmatimonadetes bacterium	uncultured Gemmatimonadetes bacterium	uncultured Gemmatimonadetes bacterium	uncultured Gemmatimonadetes bacterium
213320d097f3124c2d1adee4ae09d7c1	B11044_uncultured	8	0	0	-0.708556	#N/A	Peripheral	Bacteria	Proteobacteria	Gammaproteobacteria	Diplorickettsiales	Diplorickettsiaceae	uncultured	#N/A
28e880ad836c80933afb024e01679a23	B2314_uncultured bacterium SJA-22	8	0	0	-0.716292	#N/A	Peripheral	Bacteria	Armatimonadetes	Chthonomonadetes	Chthonomonadales	uncultured bacterium SJA-22	uncultured bacterium SJA-22	uncultured bacterium SJA-22
35d98f2585a0cbc2edd1bae1b98c6b5c	B12215_o_NA	8	0	0	-0.708556	#N/A	Peripheral	Bacteria	Actinobacteria	#N/A	#N/A	#N/A	#N/A	#N/A
3a5fe12b26695da4b44669406fd6e222	B1540_f_Pedosphaeraceae	8	2.09837e-05	0.21875	-0.911008	#N/A	Peripheral	Bacteria	Verrucomicrobia	Verrucomicrobiae	Pedosphaerales	Pedosphaeraceae	#N/A	#N/A
42f9439aa92fcf6c606bec6e8f08a388	B2982_f_mle1-27	8	0	0	-0.716292	#N/A	Peripheral	Bacteria	Proteobacteria	Deltaproteobacteria	Myxococcales	mle1-27	#N/A	#N/A
46fd77b63107845b73e82448b33439df	B12883_o_SJA-28	8	0	0	-0.716292	#N/A	Peripheral	Bacteria	Bacteroidetes	Ignavibacteria	SJA-28	#N/A	#N/A	#N/A
4c622e7cd6874e26778b75e7bd01b0e4	B5671_o_NA	8	1.52439e-05	0	-0.827004	#N/A	Peripheral	Bacteria	#N/A	#N/A	#N/A	#N/A	#N/A	#N/A
54f3f02e620bb5b24d71d7c5c17bb32c	B10951_Sandaracinus	8	0	0	-0.716292	#N/A	Peripheral	Bacteria	Proteobacteria	Deltaproteobacteria	Myxococcales	Sandaracinaceae	Sandaracinus	#N/A
6840b8e749d96367bd4e9c8b06c54dbc	B1943_uncultured Caldilineaceae bacterium	8	1.1704e-05	0	-0.827004	#N/A	Peripheral	Bacteria	Chloroflexi	Anaerolineae	RBG-13-54-9	uncultured Caldilineaceae bacterium	uncultured Caldilineaceae bacterium	uncultured Caldilineaceae bacterium
6edde59c19a6c32a4dd500f805d5a507	B4434_Chthonomonas	8	1.09484e-08	0	-0.729616	#N/A	Peripheral	Bacteria	Armatimonadetes	Chthonomonadetes	Chthonomonadales	Chthonomonadaceae	Chthonomonas	uncultured Armatimonadetes bacterium
80d7d40c8dcca24dfe045e9832a6a287	B5687_uncultured bacterium	8	0	0.21875	-0.750201	#N/A	Peripheral	Bacteria	Proteobacteria	Deltaproteobacteria	Myxococcales	KD3-10	uncultured bacterium	uncultured bacterium
98ef3d693a3ca08732eed39658a9225c	B11726_o_NA	8	0	0.21875	-0.867865	#N/A	Peripheral	Bacteria	#N/A	#N/A	#N/A	#N/A	#N/A	#N/A
9f022dba25b30030510ec1bfb45611c5	B13551_Haliangium	8	0	0.21875	-0.845235	#N/A	Peripheral	Bacteria	Proteobacteria	Deltaproteobacteria	Myxococcales	Haliangiaceae	Haliangium	Betaproteobacteria bacterium RIFCSPLOWO2_12_FULL_64_23
AB672245.1.1436	B1847_uncultured bacterium	8	5.97254e-05	0.21875	-0.911008	#N/A	Peripheral	Bacteria	Acidobacteria	Acidobacteriia	Subgroup 12	uncultured bacterium	uncultured bacterium	uncultured bacterium
AF523969.1.1317	B1319_Syntrophorhabdus	8	0.000105022	0.21875	-0.911008	#N/A	Peripheral	Bacteria	Proteobacteria	Deltaproteobacteria	Deltaproteobacteria Incertae Sedis	Syntrophorhabdaceae	Syntrophorhabdus	#N/A
AM157329.1.1204	B725_uncultured	8	0	0.21875	-0.867865	#N/A	Peripheral	Bacteria	Gemmatimonadetes	Gemmatimonadetes	Gemmatimonadales	Gemmatimonadaceae	uncultured	#N/A
b2716ffdd925448630040a3153e9237a	B7598_uncultured Gemmatimonadetes bacterium	8	1.43549e-05	0	-0.827004	#N/A	Peripheral	Bacteria	Chloroflexi	Anaerolineae	SBR1031	uncultured Gemmatimonadetes bacterium	uncultured Gemmatimonadetes bacterium	uncultured Gemmatimonadetes bacterium
ca68da6b9296005aee83726e6620b9a8	B4320_uncultured Chlorobi bacterium	8	0	0	-0.729616	#N/A	Peripheral	Bacteria	Bacteroidetes	Ignavibacteria	SJA-28	uncultured Chlorobi bacterium	uncultured Chlorobi bacterium	uncultured Chlorobi bacterium
CU925786.1.1382	B377_Syntrophorhabdus	8	2.47269e-05	0	-0.827004	#N/A	Peripheral	Bacteria	Proteobacteria	Deltaproteobacteria	Deltaproteobacteria Incertae Sedis	Syntrophorhabdaceae	Syntrophorhabdus	uncultured Syntrophorhabdaceae bacterium TA14
DQ017932.1.1506	B1414_Phaselicystis	8	0	0	-0.91416	#N/A	Peripheral	Bacteria	Proteobacteria	Deltaproteobacteria	Myxococcales	Phaselicystidaceae	Phaselicystis	#N/A
e510843e69341e7ce41a4e4045f207b6	B12151_o_MSBL9	8	0	0	-0.91416	#N/A	Peripheral	Bacteria	Planctomycetes	Phycisphaerae	MSBL9	#N/A	#N/A	#N/A
EF020004.1.1344	B6747_uncultured Chloroflexus sp.	8	0	0	-0.708556	#N/A	Peripheral	Bacteria	Chloroflexi	TK10	uncultured Chloroflexus sp.	uncultured Chloroflexus sp.	uncultured Chloroflexus sp.	uncultured Chloroflexus sp.
EF515981.1.1489	B8398_Chthoniobacter	8	0	0	-0.816764	#N/A	Peripheral	Bacteria	Verrucomicrobia	Verrucomicrobiae	Chthoniobacterales	Chthoniobacteraceae	Chthoniobacter	uncultured bacterium
EU104330.1.1444	B8675_uncultured bacterium	8	0	0.21875	-0.867865	#N/A	Peripheral	Bacteria	Bacteroidetes	Bacteroidia	Sphingobacteriales	env.OPS 17	uncultured bacterium	uncultured bacterium
EU132860.1.1269	B4227_uncultured	8	1.20458e-06	0	-0.827004	#N/A	Peripheral	Bacteria	Actinobacteria	Acidimicrobiia	Microtrichales	Ilumatobacteraceae	uncultured	uncultured bacterium
EU421859.1.1444	B4258_Iamia	8	1.99647e-08	0	-0.91416	#N/A	Peripheral	Bacteria	Actinobacteria	Acidimicrobiia	Microtrichales	Iamiaceae	Iamia	uncultured Acidimicrobiales bacterium
fa50ffd62fdb986a3175b039cbe4b668	B2200_Gemmata	8	9.73598e-05	0.375	-0.995012	#N/A	Peripheral	Bacteria	Planctomycetes	Planctomycetacia	Gemmatales	Gemmataceae	Gemmata	Gemmata sp. Fl1-1
FJ516878.1.1524	B1833_Desulfobacca	8	0	0.21875	-0.845235	#N/A	Peripheral	Bacteria	Proteobacteria	Deltaproteobacteria	Syntrophobacterales	Syntrophaceae	Desulfobacca	bacterium enrichment culture clone E8
FJ625330.1.1437	B1827_f_URHD0088	8	8.27804e-09	0	-0.91416	#N/A	Peripheral	Bacteria	Proteobacteria	Alphaproteobacteria	Elsterales	URHD0088	#N/A	#N/A
FPLP01010190.2.1263	B3031_Bdellovibrio	8	0	0	-0.827004	#N/A	Peripheral	Bacteria	Proteobacteria	Deltaproteobacteria	Bdellovibrionales	Bdellovibrionaceae	Bdellovibrio	metagenome
HM331033.1.1352	B3402_Mucilaginibacter	8	1.61619e-08	0	-0.725052	#N/A	Peripheral	Bacteria	Bacteroidetes	Bacteroidia	Sphingobacteriales	Sphingobacteriaceae	Mucilaginibacter	#N/A
HQ190299.1.1494	B7984_Ohtaekwangia	8	0	0	-0.729616	#N/A	Peripheral	Bacteria	Bacteroidetes	Bacteroidia	Cytophagales	Microscillaceae	Ohtaekwangia	#N/A
HQ462513.1.1303	B4587_uncultured	8	3.36541e-07	0.21875	-0.911008	#N/A	Peripheral	Bacteria	Gemmatimonadetes	Gemmatimonadetes	Gemmatimonadales	Gemmatimonadaceae	uncultured	uncultured prokaryote
JF176746.1.1352	B12574_uncultured	8	2.15546e-08	0	-0.716292	#N/A	Peripheral	Bacteria	Planctomycetes	Planctomycetacia	Isosphaerales	Isosphaeraceae	uncultured	#N/A
JN038879.1.1511	B774_uncultured Acidobacteria bacterium	8	0	0	-0.708556	#N/A	Peripheral	Bacteria	Acidobacteria	Acidobacteriia	Subgroup 13	uncultured Acidobacteria bacterium	uncultured Acidobacteria bacterium	uncultured Acidobacteria bacterium
JN380984.1.1362	B12190_Legionella	8	0	0	-0.737942	#N/A	Peripheral	Bacteria	Proteobacteria	Gammaproteobacteria	Legionellales	Legionellaceae	Legionella	Legionella sp. D2863
JX224110.1.1417	B1177_f_Desulfobulbaceae	8	2.89643e-06	0	-0.827004	#N/A	Peripheral	Bacteria	Proteobacteria	Deltaproteobacteria	Desulfobacterales	Desulfobulbaceae	#N/A	#N/A
KC424686.1.1518	B1188_uncultured bacterium	8	5.50877e-05	0.21875	-0.911008	#N/A	Peripheral	Bacteria	Bacteroidetes	Bacteroidia	Sphingobacteriales	env.OPS 17	uncultured bacterium	uncultured bacterium
KX753053.1.1460	B3267_metagenome	8	0	0	-0.816764	#N/A	Peripheral	Bacteria	Chloroflexi	Chloroflexia	Thermomicrobiales	JG30-KF-CM45	metagenome	metagenome
LC124575.1.1481	B304_f_UASB-TL25	8	4.03591e-06	0	-0.827004	#N/A	Peripheral	Bacteria	Proteobacteria	Deltaproteobacteria	Myxococcales	UASB-TL25	#N/A	#N/A
LC124788.1.1452	B2112_uncultured	8	1.35317e-06	0	-0.827004	#N/A	Peripheral	Bacteria	Planctomycetes	Planctomycetacia	Pirellulales	Pirellulaceae	uncultured	uncultured bacterium
066b8ec1e2c9c2b470af307d8df670eb	F1810_o_NA	8	0	0	-0.708556	#N/A	Peripheral	Fungi	#N/A	#N/A	#N/A	#N/A	#N/A	#N/A
073189d33f6691a39bdefc911b70821a	F368_Mortierella	8	0.00033068	0.21875	-0.911008	#N/A	Peripheral	Fungi	Mortierellomycota	Mortierellomycetes	Mortierellales	Mortierellaceae	Mortierella	Mortierella_alpina
19f571ed3549f495076dd7209a12a19a	F3616_unidentified	8	4.90203e-05	0.21875	-0.911008	#N/A	Peripheral	Fungi	unidentified	unidentified	unidentified	unidentified	unidentified	unidentified
46ef2e3eaa48631b00593e4c4c134848	F1430_o_Eurotiales	8	1.21301e-05	0	-0.827004	#N/A	Peripheral	Fungi	Ascomycota	Eurotiomycetes	Eurotiales	#N/A	#N/A	#N/A
6549e115f37e3c7facccfc36a4e7e8e1	F6062_o_NA	8	0	0	-0.716292	#N/A	Peripheral	Fungi	#N/A	#N/A	#N/A	#N/A	#N/A	#N/A
6e712595f4bc1afca76bff7e6e9b08af	F2356_o_NA	8	1.62751e-05	0	-0.827004	#N/A	Peripheral	Fungi	Ascomycota	#N/A	#N/A	#N/A	#N/A	#N/A
7c9cdb6f7ef83d1392d66c77acc2f143	F2760_unidentified	8	0	0	-0.91416	#N/A	Peripheral	Fungi	unidentified	unidentified	unidentified	unidentified	unidentified	unidentified
cbd9441142e3d2452982debfef1cff81	F1734_unidentified	8	0	0.21875	-0.911008	#N/A	Peripheral	Fungi	unidentified	unidentified	unidentified	unidentified	unidentified	unidentified
e0ac38a21951b46fb287392a9bb69c71	F1910_o_NA	8	3.08698e-05	0.21875	-0.911008	#N/A	Peripheral	Fungi	#N/A	#N/A	#N/A	#N/A	#N/A	#N/A
eb8c9f3366ed577dc2f24989017f5aa0	F4671_Rhodotorula	8	0	0	-0.729616	#N/A	Peripheral	Fungi	Basidiomycota	Microbotryomycetes	Sporidiobolales	Sporidiobolaceae	Rhodotorula	Rhodotorula_ingeniosa
f12b9475155022cc3517e814235491cc	F980_unidentified	8	0.000106196	0	-0.827004	#N/A	Peripheral	Fungi	Chytridiomycota	unidentified	unidentified	unidentified	unidentified	unidentified
SH193776.07FU_AB474396_reps	F317_o_NA	8	4.0177e-05	0.375	-0.995012	#N/A	Peripheral	Fungi	Basidiomycota	Microbotryomycetes	#N/A	#N/A	#N/A	#N/A
SH211282.07FU_KJ573443_refs	F765_Phialemoniopsis	8	1.17895e-05	0	-0.827004	#N/A	Peripheral	Fungi	Ascomycota	Sordariomycetes	Xylariales	Xylariales_fam_Incertae_sedis	Phialemoniopsis	Phialemoniopsis_curvata
00d530d05eae45fa94b8c0f91c4eeb82	B11922_Microseira Carmichael-Alabama	7	0	1.11022e-16	-0.770831	#N/A	Peripheral	Bacteria	Cyanobacteria	Oxyphotobacteria	Nostocales	Nostocales Incertae Sedis	Microseira Carmichael-Alabama	uncultured bacterium
094c43f100f433ade36915f0c912375b	B3004_uncultured bacterium	7	5.35614e-05	1.11022e-16	-0.911008	#N/A	Peripheral	Bacteria	Latescibacteria	uncultured bacterium	uncultured bacterium	uncultured bacterium	uncultured bacterium	uncultured bacterium
2fd53e658a40a5d9b85dc2669997120e	B2319_o_SBR1031	7	7.73889e-07	1.11022e-16	-0.752345	#N/A	Peripheral	Bacteria	Chloroflexi	Anaerolineae	SBR1031	#N/A	#N/A	#N/A
3df6e1579b2e0e33ab7a6510b29921dc	B1750_uncultured	7	0	1.11022e-16	-0.911008	#N/A	Peripheral	Bacteria	Chloroflexi	Anaerolineae	Anaerolineales	Anaerolineaceae	uncultured	uncultured Chloroflexi bacterium
42beb58dc0d1e3f72360bb644e29de81	B2000_uncultured Anaerolineaceae bacterium	7	0	1.11022e-16	-0.764904	#N/A	Peripheral	Bacteria	Chloroflexi	Anaerolineae	RBG-13-54-9	uncultured Anaerolineaceae bacterium	uncultured Anaerolineaceae bacterium	uncultured Anaerolineaceae bacterium
5a51a6d8a39b0428628df66d36d9c707	B3926_uncultured sludge bacterium A31	7	0.000111328	1.11022e-16	-0.911008	#N/A	Peripheral	Bacteria	Chloroflexi	Anaerolineae	RBG-13-54-9	uncultured sludge bacterium A31	uncultured sludge bacterium A31	uncultured sludge bacterium A31
5b13c4356f205f2318f89c24c971c6f9	B5215_uncultured bacterium	7	2.65602e-05	1.11022e-16	-0.911008	#N/A	Peripheral	Bacteria	Chloroflexi	TK10	uncultured bacterium	uncultured bacterium	uncultured bacterium	uncultured bacterium
a975cf2477e58778ebc2c4cd258050da	B445_uncultured Archangiaceae bacterium	7	0	1.11022e-16	-0.764017	#N/A	Peripheral	Bacteria	Proteobacteria	Deltaproteobacteria	Myxococcales	uncultured	uncultured Archangiaceae bacterium	uncultured Archangiaceae bacterium
AB661542.1.1443	B3292_o_NA	7	0	1.11022e-16	-0.750201	#N/A	Peripheral	Bacteria	Actinobacteria	MB-A2-108	#N/A	#N/A	#N/A	#N/A
AF524009.1.1291	B2694_Spirochaeta 2	7	0	1.11022e-16	-0.942818	#N/A	Peripheral	Bacteria	Spirochaetes	Spirochaetia	Spirochaetales	Spirochaetaceae	Spirochaeta 2	Spirochaeta sp.
DQ450729.1.1352	B625_o_NA	7	0.000305846	1.11022e-16	-0.911008	#N/A	Peripheral	Bacteria	Chloroflexi	TK10	#N/A	#N/A	#N/A	#N/A
e5a3e85aef1660eba6140b51cddc390b	B1089_uncultured bacterium	7	2.76455e-06	1.11022e-16	-0.911008	#N/A	Peripheral	Bacteria	Acidobacteria	Acidobacteriia	Subgroup 12	uncultured bacterium	uncultured bacterium	uncultured bacterium
EF018305.1.1386	B218_uncultured Burkholderiaceae bacterium	7	0	1.11022e-16	-0.740646	#N/A	Peripheral	Bacteria	Proteobacteria	Gammaproteobacteria	Betaproteobacteriales	A21b	uncultured Burkholderiaceae bacterium	uncultured Burkholderiaceae bacterium
EU132741.1.1303	B3773_Pseudonocardia	7	5.83527e-07	0.408163	-1.07902	#N/A	Peripheral	Bacteria	Actinobacteria	Actinobacteria	Pseudonocardiales	Pseudonocardiaceae	Pseudonocardia	#N/A
EU135078.1.1331	B6491_Gemmata	7	0	1.11022e-16	-0.752345	#N/A	Peripheral	Bacteria	Planctomycetes	Planctomycetacia	Gemmatales	Gemmataceae	Gemmata	#N/A
EU135251.1.1375	B1000_uncultured	7	0	0.244898	-0.995012	#N/A	Peripheral	Bacteria	Planctomycetes	Planctomycetacia	Gemmatales	Gemmataceae	uncultured	uncultured bacterium
f5efd68e4a931753703a80c0b53ea772	B13597_uncultured	7	0	1.11022e-16	-0.845235	#N/A	Peripheral	Bacteria	Planctomycetes	Planctomycetacia	Gemmatales	Gemmataceae	uncultured	#N/A
FN689718.1.1407	B3190_Paenibacillus	7	2.72727e-08	1.11022e-16	-0.845235	#N/A	Peripheral	Bacteria	Firmicutes	Bacilli	Bacillales	Paenibacillaceae	Paenibacillus	Paenibacillus chartarius
FPLS01018227.1.1369	B7111_uncultured Chlorobiales bacterium	7	0	1.11022e-16	-0.911008	#N/A	Peripheral	Bacteria	Bacteroidetes	Ignavibacteria	OPB56	uncultured Chlorobiales bacterium	uncultured Chlorobiales bacterium	uncultured Chlorobiales bacterium
FPLS01052738.1.1284	B6452_Lacunisphaera	7	3.23238e-09	1.11022e-16	-0.845235	#N/A	Peripheral	Bacteria	Verrucomicrobia	Verrucomicrobiae	Opitutales	Opitutaceae	Lacunisphaera	#N/A
FPLS01061425.11.1548	B6363_Chthoniobacter	7	0	1.11022e-16	-0.752345	#N/A	Peripheral	Bacteria	Verrucomicrobia	Verrucomicrobiae	Chthoniobacterales	Chthoniobacteraceae	Chthoniobacter	#N/A
HM318821.1.1366	B3350_f_uncultured	7	0	1.11022e-16	-0.770831	#N/A	Peripheral	Bacteria	Actinobacteria	Thermoleophilia	Gaiellales	uncultured	#N/A	#N/A
JF135806.1.1355	B3161_uncultured Nitrosomonadaceae bacterium	7	0	1.11022e-16	-0.740646	#N/A	Peripheral	Bacteria	Proteobacteria	Gammaproteobacteria	Betaproteobacteriales	SC-I-84	uncultured Nitrosomonadaceae bacterium	uncultured Nitrosomonadaceae bacterium
JF218925.1.1367	B3752_o_NA	7	0	1.11022e-16	-0.770831	#N/A	Peripheral	Bacteria	Elusimicrobia	Lineage IIa	#N/A	#N/A	#N/A	#N/A
JF703387.1.1439	B3727_Candidatus Ovatusbacter	7	1.11343e-05	1.11022e-16	-0.911008	#N/A	Peripheral	Bacteria	Proteobacteria	Gammaproteobacteria	Gammaproteobacteria Incertae Sedis	Unknown Family	Candidatus Ovatusbacter	uncultured proteobacterium
KX146487.1.1420	B4981_uncultured	7	0	1.11022e-16	-0.845235	#N/A	Peripheral	Bacteria	Bacteroidetes	Bacteroidia	Chitinophagales	Chitinophagaceae	uncultured	Flavitalea sp. AQ6-291
KY190707.1.1459	B3413_Verrucomicrobium	7	0.000204592	0.244898	-0.995012	#N/A	Peripheral	Bacteria	Verrucomicrobia	Verrucomicrobiae	Verrucomicrobiales	Verrucomicrobiaceae	Verrucomicrobium	#N/A
2590a9f42a777543d5860f126778679c	F836_unidentified	7	2.16638e-08	1.11022e-16	-0.770831	#N/A	Peripheral	Fungi	unidentified	unidentified	unidentified	unidentified	unidentified	unidentified
60c8c28b46048baf2fa46dd18d95c1b0	F7160_o_NA	7	4.95783e-08	1.11022e-16	-0.942818	#N/A	Peripheral	Fungi	#N/A	#N/A	#N/A	#N/A	#N/A	#N/A
7bb427cc70528575cad578cb351073f6	F1662_o_NA	7	1.538e-05	1.11022e-16	-0.911008	#N/A	Peripheral	Fungi	#N/A	#N/A	#N/A	#N/A	#N/A	#N/A
f66ef4cf7d9799ef9ee1b871b3e2b84a	F4480_o_NA	7	0	1.11022e-16	-0.911008	#N/A	Peripheral	Fungi	#N/A	#N/A	#N/A	#N/A	#N/A	#N/A
SH179782.07FU_JX043028_reps	F559_Articulospora	7	3.18882e-06	1.11022e-16	-0.911008	#N/A	Peripheral	Fungi	Ascomycota	Leotiomycetes	Helotiales	Helotiaceae	Articulospora	unidentified
SH180757.07FU_KU574712_reps	F963_o_NA	7	2.1256e-05	1.11022e-16	-0.911008	#N/A	Peripheral	Fungi	#N/A	#N/A	#N/A	#N/A	#N/A	#N/A
SH187566.07FU_HE861822_refs	F1087_Curvularia	7	0	1.11022e-16	-0.764017	#N/A	Peripheral	Fungi	Ascomycota	Dothideomycetes	Pleosporales	Pleosporaceae	Curvularia	Curvularia_inaequalis
e455d6f571e618e37faeea014b9d07f2	A1122_uncultured euryarchaeote	6	0	0.277778	-0.828972	#N/A	Peripheral	Archaea	Nanoarchaeaeota	Woesearchaeia	uncultured euryarchaeote	uncultured euryarchaeote	uncultured euryarchaeote	uncultured euryarchaeote
03bca42f7c698e272109916604912352	B11135_uncultured soil bacterium PBS-II-37	6	0	0	-0.772735	#N/A	Peripheral	Bacteria	Planctomycetes	Pla3 lineage	uncultured soil bacterium PBS-II-37	uncultured soil bacterium PBS-II-37	uncultured soil bacterium PBS-II-37	uncultured soil bacterium PBS-II-37
289932287107107260e37aa17cbe31d6	B1897_uncultured bacterium	6	0.000213083	0	-0.995012	#N/A	Peripheral	Bacteria	Armatimonadetes	DG-56	uncultured bacterium	uncultured bacterium	uncultured bacterium	uncultured bacterium
36dcc7b9102adf6b9bab6a9a265b0efd	B2817_uncultured bacterium	6	0	0	-0.995012	#N/A	Peripheral	Bacteria	Chloroflexi	Anaerolineae	SBR1031	A4b	uncultured bacterium	uncultured bacterium
3ecfe2463319d56f3db284c882da99ff	B3786_Candidatus Ovatusbacter	6	0	0	-0.995012	#N/A	Peripheral	Bacteria	Proteobacteria	Gammaproteobacteria	Gammaproteobacteria Incertae Sedis	Unknown Family	Candidatus Ovatusbacter	#N/A
43d7620c099269cf7b67f82dbc524272	B7718_uncultured	6	0	0	-0.788398	#N/A	Peripheral	Bacteria	Chloroflexi	Anaerolineae	Caldilineales	Caldilineaceae	uncultured	Chloroflexi bacterium ET1
4ed1102b4740c35a67930558f7317e7d	B6294_uncultured bacterium	6	0	0.277778	-0.924078	#N/A	Peripheral	Bacteria	Fibrobacteres	Chitinivibrionia	uncultured	uncultured bacterium	uncultured bacterium	uncultured bacterium
5a4b6533743d100f241d9515e5e626c8	B7290_metagenome	6	0	0	-0.995012	#N/A	Peripheral	Bacteria	Actinobacteria	Thermoleophilia	Gaiellales	uncultured	metagenome	metagenome
650a7b9613775dd7f7463fbfce2f2546	B10099_uncultured bacterium	6	0	0	-0.788398	#N/A	Peripheral	Bacteria	Proteobacteria	Deltaproteobacteria	Myxococcales	P3OB-42	uncultured bacterium	uncultured bacterium
737d656d660000a53498d1da84b36ce8	B2258_uncultured bacterium	6	0	0	-0.995012	#N/A	Peripheral	Bacteria	Acidobacteria	Subgroup 22	uncultured bacterium	uncultured bacterium	uncultured bacterium	uncultured bacterium
778229643d02003d7fc30aff58978f2f	B4558_Spirochaeta 2	6	0	0	-0.995012	#N/A	Peripheral	Bacteria	Spirochaetes	Spirochaetia	Spirochaetales	Spirochaetaceae	Spirochaeta 2	Spirochaeta sp.
7c1a687ed9a5e68647b39418fb99761a	B3100_Spirochaeta 2	6	0	0	-0.772735	#N/A	Peripheral	Bacteria	Spirochaetes	Spirochaetia	Spirochaetales	Spirochaetaceae	Spirochaeta 2	uncultured bacterium
9493ebbcae72da91b43f6855ca23d437	B2632_Sandaracinus	6	0	0	-0.995012	#N/A	Peripheral	Bacteria	Proteobacteria	Deltaproteobacteria	Myxococcales	Sandaracinaceae	Sandaracinus	uncultured soil bacterium
9dadbf4d3479dbde49c3aa22611f9029	B3077_uncultured	6	0	0	-0.873706	#N/A	Peripheral	Bacteria	Chloroflexi	Anaerolineae	Anaerolineales	Anaerolineaceae	uncultured	uncultured Bellilinea sp.
9e76f56a453c8a303a992079ca32fca1	B8564_f_Isosphaeraceae	6	0	0	-0.971476	#N/A	Peripheral	Bacteria	Planctomycetes	Planctomycetacia	Isosphaerales	Isosphaeraceae	#N/A	#N/A
a849d6f731ac234beb293e5ef037c492	B10794_uncultured prokaryote	6	0	0	-0.803721	#N/A	Peripheral	Bacteria	Acidobacteria	Subgroup 22	uncultured prokaryote	uncultured prokaryote	uncultured prokaryote	uncultured prokaryote
AB487448.1.1322	B5689_Pedomicrobium	6	0	0	-0.995012	#N/A	Peripheral	Bacteria	Proteobacteria	Alphaproteobacteria	Rhizobiales	Hyphomicrobiaceae	Pedomicrobium	#N/A
AF234736.1.1514	B7181_uncultured	6	0	0	-0.803721	#N/A	Peripheral	Bacteria	Planctomycetes	Planctomycetacia	Pirellulales	Pirellulaceae	uncultured	uncultured sludge bacterium A40
AF234760.1.1512	B7511_uncultured	6	0	0	-0.772735	#N/A	Peripheral	Bacteria	Planctomycetes	Planctomycetacia	Pirellulales	Pirellulaceae	uncultured	uncultured sludge bacterium A17
AF524008.1.1308	B2932_o_uncultured	6	0	0.277778	-0.924078	#N/A	Peripheral	Bacteria	Nitrospirae	Thermodesulfovibrionia	uncultured	#N/A	#N/A	#N/A
AJ390475.1.1330	B1473_Pir2 lineage	6	1.67355e-06	0	-0.995012	#N/A	Peripheral	Bacteria	Planctomycetes	Planctomycetacia	Pirellulales	Pirellulaceae	Pir2 lineage	uncultured bacterium
AM935733.1.1304	B3864_metagenome	6	0	0	-0.772735	#N/A	Peripheral	Bacteria	Chloroflexi	JG30-KF-CM66	metagenome	metagenome	metagenome	metagenome
AY289463.1.1295	B5041_uncultured Armatimonadetes bacterium	6	0	0	-0.772735	#N/A	Peripheral	Bacteria	Chloroflexi	JG30-KF-CM66	uncultured Armatimonadetes bacterium	uncultured Armatimonadetes bacterium	uncultured Armatimonadetes bacterium	uncultured Armatimonadetes bacterium
AY922159.1.1342	B12934_Sphingomonas	6	0	0	-0.971476	#N/A	Peripheral	Bacteria	Proteobacteria	Alphaproteobacteria	Sphingomonadales	Sphingomonadaceae	Sphingomonas	#N/A
b0b3876450c40fefc781dcc178c9b7c1	B12383_o_NA	6	0	0	-0.873706	#N/A	Peripheral	Bacteria	Chloroflexi	SHA-26	#N/A	#N/A	#N/A	#N/A
b350758854b79942fa3bd139d9872d04	B1645_BSV13	6	0	0.277778	-0.828972	#N/A	Peripheral	Bacteria	Bacteroidetes	Bacteroidia	Bacteroidales	Prolixibacteraceae	BSV13	uncultured Prolixibacter sp.
bdf06483bd9b943e4c523ee9c3be460c	B2101_o_NA	6	0	0	-0.995012	#N/A	Peripheral	Bacteria	Acidobacteria	Subgroup 25	#N/A	#N/A	#N/A	#N/A
cad0803a7116bfb7dbef4cc4bc19cfcd	B6856_uncultured bacterium	6	0	0	-0.800192	#N/A	Peripheral	Bacteria	Chloroflexi	Anaerolineae	SBR1031	uncultured bacterium	uncultured bacterium	uncultured bacterium
ce4f936ed386da1ce6806a95a090e87c	B1535_planctomycete WWH14	6	0	0	-0.803721	#N/A	Peripheral	Bacteria	Planctomycetes	Phycisphaerae	Tepidisphaerales	WD2101 soil group	planctomycete WWH14	planctomycete WWH14
CU925320.1.1342	B10125_CL500-29 marine group	6	0	0.277778	-0.828972	#N/A	Peripheral	Bacteria	Actinobacteria	Acidimicrobiia	Microtrichales	Ilumatobacteraceae	CL500-29 marine group	metagenome
d452c4ffbd3c9ae2113a6d7a8d8d5d80	B1600_o_Myxococcales	6	2.07719e-06	0.277778	-1.07902	#N/A	Peripheral	Bacteria	Proteobacteria	Deltaproteobacteria	Myxococcales	#N/A	#N/A	#N/A
DQ415836.1.1505	B4877_[Desulfobacterium] catecholicum group	6	0	0	-0.802981	#N/A	Peripheral	Bacteria	Proteobacteria	Deltaproteobacteria	Desulfobacterales	Desulfobulbaceae	[Desulfobacterium] catecholicum group	#N/A
EU132520.1.1415	B5346_o_NA	6	0	0	-0.873706	#N/A	Peripheral	Bacteria	Actinobacteria	MB-A2-108	#N/A	#N/A	#N/A	#N/A
EU132945.1.1329	B3096_o_NA	6	2.61445e-06	0	-0.995012	#N/A	Peripheral	Bacteria	Actinobacteria	Acidimicrobiia	#N/A	#N/A	#N/A	#N/A
EU135494.1.1393	B2315_uncultured verrucomicrobium DEV064	6	7.11257e-06	0	-0.995012	#N/A	Peripheral	Bacteria	Verrucomicrobia	Verrucomicrobiae	Pedosphaerales	Pedosphaeraceae	uncultured verrucomicrobium DEV064	uncultured verrucomicrobium DEV064
FJ432487.1.1253	B4499_metagenome	6	4.55566e-06	0	-0.995012	#N/A	Peripheral	Bacteria	Bacteroidetes	Bacteroidia	Chitinophagales	uncultured	metagenome	metagenome
FJ822643.1.1381	B10498_Chthoniobacter	6	0	0.277778	-0.828972	#N/A	Peripheral	Bacteria	Verrucomicrobia	Verrucomicrobiae	Chthoniobacterales	Chthoniobacteraceae	Chthoniobacter	#N/A
FPLL01005990.12.1510	B5160_Pirellula	6	0	0	-0.788398	#N/A	Peripheral	Bacteria	Planctomycetes	Planctomycetacia	Pirellulales	Pirellulaceae	Pirellula	uncultured Pasteuria sp.
FPLP01001558.2.1434	B2277_o_NA	6	0	0	-0.800192	#N/A	Peripheral	Bacteria	Elusimicrobia	Lineage IIb	#N/A	#N/A	#N/A	#N/A
FPLS01001113.1.1211	B2381_metagenome	6	0	0	-0.800192	#N/A	Peripheral	Bacteria	Actinobacteria	Thermoleophilia	Solirubrobacterales	67-14	metagenome	metagenome
FPLS01029737.1.1280	B11438_uncultured	6	0	0	-0.800192	#N/A	Peripheral	Bacteria	Bacteroidetes	Bacteroidia	Cytophagales	Microscillaceae	uncultured	#N/A
FPLS01042617.22.1501	B7570_Gemmata	6	0	0	-0.995012	#N/A	Peripheral	Bacteria	Planctomycetes	Planctomycetacia	Gemmatales	Gemmataceae	Gemmata	#N/A
HM243915.1.1540	B4179_uncultured bacterium	6	0	0	-0.895972	#N/A	Peripheral	Bacteria	Planctomycetes	Phycisphaerae	mle1-8	uncultured bacterium	uncultured bacterium	uncultured bacterium
HM269183.1.1357	B2066_Aquicella	6	0	0	-0.995012	#N/A	Peripheral	Bacteria	Proteobacteria	Gammaproteobacteria	Diplorickettsiales	Diplorickettsiaceae	Aquicella	#N/A
HQ178845.1.1481	B1415_Desulfobulbus	6	0	0.277778	-0.924078	#N/A	Peripheral	Bacteria	Proteobacteria	Deltaproteobacteria	Desulfobacterales	Desulfobulbaceae	Desulfobulbus	uncultured Desulfobulbus sp.
HQ598464.1.1454	B490_f_Acidobacteriaceae (Subgroup 1)	6	0	0	-0.802981	#N/A	Peripheral	Bacteria	Acidobacteria	Acidobacteriia	Acidobacteriales	Acidobacteriaceae (Subgroup 1)	#N/A	#N/A
JF177396.1.1361	B2912_uncultured	6	0	0	-0.802981	#N/A	Peripheral	Bacteria	Proteobacteria	Gammaproteobacteria	Diplorickettsiales	Diplorickettsiaceae	uncultured	uncultured bacterium
JF178482.1.1354	B4152_uncultured bacterium	6	0	0	-0.995012	#N/A	Peripheral	Bacteria	Bacteroidetes	Bacteroidia	Sphingobacteriales	env.OPS 17	uncultured bacterium	uncultured bacterium
JF265795.1.1386	B7855_uncultured candidate division SPAM bacterium	6	0	0	-0.772735	#N/A	Peripheral	Bacteria	Rokubacteria	NC10	Rokubacteriales	uncultured candidate division SPAM bacterium	uncultured candidate division SPAM bacterium	uncultured candidate division SPAM bacterium
JF833937.1.1420	B5710_uncultured forest soil bacterium	6	0	0	-0.772735	#N/A	Peripheral	Bacteria	Chloroflexi	AD3	uncultured forest soil bacterium	uncultured forest soil bacterium	uncultured forest soil bacterium	uncultured forest soil bacterium
JN003139.1.1299	B1261_uncultured Bradyrhizobiaceae bacterium	6	8.48499e-09	0	-0.772735	#N/A	Peripheral	Bacteria	Proteobacteria	Alphaproteobacteria	uncultured	uncultured Bradyrhizobiaceae bacterium	uncultured Bradyrhizobiaceae bacterium	uncultured Bradyrhizobiaceae bacterium
JQ067914.1.1337	B8992_Candidatus Nostocoida	6	0	0	-0.802981	#N/A	Peripheral	Bacteria	Planctomycetes	Planctomycetacia	Isosphaerales	Isosphaeraceae	Candidatus Nostocoida	#N/A
JQ958703.1.1384	B11023_f_uncultured	6	0	0.277778	-0.924078	#N/A	Peripheral	Bacteria	Planctomycetes	Planctomycetacia	Planctomycetales	uncultured	#N/A	#N/A
JX898168.1.1520	B867_Gemmatimonas	6	6.49411e-05	0	-0.995012	#N/A	Peripheral	Bacteria	Gemmatimonadetes	Gemmatimonadetes	Gemmatimonadales	Gemmatimonadaceae	Gemmatimonas	#N/A
JXCA01000109.4491.5984	B8608_Chthonobacter	6	0	0	-0.873706	#N/A	Peripheral	Bacteria	Proteobacteria	Alphaproteobacteria	Rhizobiales	Pleomorphomonadaceae	Chthonobacter	Scytonema tolypothrichoides VB-61278
KF515265.1.1495	B1865_uncultured planctomycete	6	0	0.277778	-0.828972	#N/A	Peripheral	Bacteria	Planctomycetes	Phycisphaerae	MSBL9	SG8-4	uncultured planctomycete	uncultured planctomycete
LN566408.1.1380	B4952_uncultured Rubrobacteraceae bacterium	6	0	0.277778	-0.828972	#N/A	Peripheral	Bacteria	Actinobacteria	Thermoleophilia	Solirubrobacterales	67-14	uncultured Rubrobacteraceae bacterium	uncultured Rubrobacteraceae bacterium
031472f0a5b72b5749902476ae16fdeb	F5529_o_NA	6	0	0	-0.803721	#N/A	Peripheral	Fungi	#N/A	#N/A	#N/A	#N/A	#N/A	#N/A
2b3f7dbe4f86358c51d8e3ff694488e7	F674_o_NA	6	1.26996e-05	0	-0.995012	#N/A	Peripheral	Fungi	#N/A	#N/A	#N/A	#N/A	#N/A	#N/A
2cada21717446f3b492827738c2dbcf4	F1357_unidentified	6	1.46361e-05	0.277778	-1.07902	#N/A	Peripheral	Fungi	Rozellomycota	unidentified	unidentified	unidentified	unidentified	unidentified
52239aa79d7eebd40ea5ca6d889dc9b6	F5308_o_NA	6	0	0	-0.803721	#N/A	Peripheral	Fungi	#N/A	#N/A	#N/A	#N/A	#N/A	#N/A
5ea04be93df5193d6ccc425c19c5292d	F4570_Torula	6	0	0	-0.802981	#N/A	Peripheral	Fungi	Ascomycota	Dothideomycetes	Pleosporales	Torulaceae	Torula	Torula_hollandica
7ee6fe3d6b38d5cc5331ee461552facb	F3259_o_Capnodiales	6	0	0	-0.803721	#N/A	Peripheral	Fungi	Ascomycota	Dothideomycetes	Capnodiales	#N/A	#N/A	#N/A
8b2fc70cbd5f80128eaccf4f64dade73	F4815_o_NA	6	0	0.277778	-0.828972	#N/A	Peripheral	Fungi	#N/A	#N/A	#N/A	#N/A	#N/A	#N/A
988ce70c625909091580050518d2b92c	F862_o_NA	6	0.000111882	0.277778	-1.07902	#N/A	Peripheral	Fungi	#N/A	#N/A	#N/A	#N/A	#N/A	#N/A
9e1b0fb2f53b40cd52f075ba1c58b490	F1730_Setophoma	6	0	0	-0.800192	#N/A	Peripheral	Fungi	Ascomycota	Dothideomycetes	Pleosporales	Phaeosphaeriaceae	Setophoma	Setophoma_vernoniae
aa433810bfe775a14c7ce8662eae0943	F3676_o_NA	6	0	0	-0.971476	#N/A	Peripheral	Fungi	#N/A	#N/A	#N/A	#N/A	#N/A	#N/A
aabe07ba3b63272ba0bd43f586378bb7	F2364_o_NA	6	0	0.277778	-0.828972	#N/A	Peripheral	Fungi	#N/A	#N/A	#N/A	#N/A	#N/A	#N/A
d0416174a8ac22b46f44d8777f5f3b29	F1026_o_NA	6	0	0	-0.788398	#N/A	Peripheral	Fungi	#N/A	#N/A	#N/A	#N/A	#N/A	#N/A
ddf8dbb9a1dfa5bd0254885f90e2d42e	F812_unidentified	6	7.67599e-06	0	-0.995012	#N/A	Peripheral	Fungi	unidentified	unidentified	unidentified	unidentified	unidentified	unidentified
e1c3ebabd88b736cc890a391775cbe6e	F1565_o_NA	6	0	0	-0.772735	#N/A	Peripheral	Fungi	#N/A	#N/A	#N/A	#N/A	#N/A	#N/A
SH214081.07FU_AB520592_reps	F177_Cryptococcus	6	2.20064e-05	0.277778	-1.07902	#N/A	Peripheral	Fungi	Basidiomycota	Tremellomycetes	Tremellales	Tremellaceae	Cryptococcus	unidentified
SH219461.07FU_JQ754042_reps	F1681_Hannaella	6	0	0	-0.995012	#N/A	Peripheral	Fungi	Basidiomycota	Tremellomycetes	Tremellales	Bulleribasidiaceae	Hannaella	Hannaella_oryzae
SH221427.07FU_KF156022_refs	F1682_Ochroconis	6	0	0.277778	-0.828972	#N/A	Peripheral	Fungi	Ascomycota	Dothideomycetes	Venturiales	Sympoventuriaceae	Ochroconis	Ochroconis_cordanae
SH467637.07FU_KP723824_reps	F813_Paranamyces	6	3.74472e-05	0	-0.995012	#N/A	Peripheral	Fungi	Chytridiomycota	Rhizophydiomycetes	Rhizophydiales	Halomycetaceae	Paranamyces	Paranamyces_uniporus
0b22e380d59ca9e066bdc9388ff3536f	B2961_metagenome	5	0	0	-1.07902	#N/A	Peripheral	Bacteria	Chloroflexi	Anaerolineae	SBR1031	metagenome	metagenome	metagenome
1a16d530165134bf8bfb522320b4c383	B4831_uncultured	5	0	0	-0.824451	#N/A	Peripheral	Bacteria	Proteobacteria	Gammaproteobacteria	Diplorickettsiales	Diplorickettsiaceae	uncultured	#N/A
1c67eea22676456e62fd8f4aaaba886e	B11138_Neochlamydia	5	0	0	-0.824451	#N/A	Peripheral	Bacteria	Chlamydiae	Chlamydiae	Chlamydiales	Parachlamydiaceae	Neochlamydia	uncultured Chlamydiales bacterium
26b4816c15ff17e544c33d9fb7a02485	B11468_uncultured	5	0	0	-0.841946	#N/A	Peripheral	Bacteria	Gemmatimonadetes	Gemmatimonadetes	Gemmatimonadales	Gemmatimonadaceae	uncultured	metagenome
2e33e3f53d3dd90ee333cbbb84006bba	B1370_f_Pedosphaeraceae	5	0	0	-0.83548	#N/A	Peripheral	Bacteria	Verrucomicrobia	Verrucomicrobiae	Pedosphaerales	Pedosphaeraceae	#N/A	#N/A
394deeac3e79772357b49ea4e41a0642	B4762_Desulfobacca	5	2.84036e-05	0	-1.07902	#N/A	Peripheral	Bacteria	Proteobacteria	Deltaproteobacteria	Syntrophobacterales	Syntrophaceae	Desulfobacca	#N/A
5a42ca9de26c727089e1b809b18e638d	B13895_Chloronema	5	9.69714e-09	0	-0.824451	#N/A	Peripheral	Bacteria	Chloroflexi	Chloroflexia	Chloroflexales	Chloroflexaceae	Chloronema	#N/A
5d5ee383095bd604f1a9c7e4a4a969bf	B11372_Paenibacillus	5	0	0	-1.00013	#N/A	Peripheral	Bacteria	Firmicutes	Bacilli	Bacillales	Paenibacillaceae	Paenibacillus	#N/A
61a689d79a98ababa301a40052aabf02	B2506_uncultured sludge bacterium A31	5	9.65227e-06	0	-1.07902	#N/A	Peripheral	Bacteria	Chloroflexi	Anaerolineae	RBG-13-54-9	uncultured sludge bacterium A31	uncultured sludge bacterium A31	uncultured sludge bacterium A31
70e91b733c96d6bf768a466e5aa2fb3d	B8717_uncultured soil bacterium	5	0	0	-0.804825	#N/A	Peripheral	Bacteria	Elusimicrobia	Lineage IIa	uncultured soil bacterium	uncultured soil bacterium	uncultured soil bacterium	uncultured soil bacterium
9632586afec71df0970afe4416b5fdb1	B12917_uncultured	5	0	0	-0.824451	#N/A	Peripheral	Bacteria	Chloroflexi	Chloroflexia	Chloroflexales	Chloroflexaceae	uncultured	uncultured bacterium
9b505994095c4de21e4c768ecff3fb0b	B10705_Aquicella	5	0	0	-0.902177	#N/A	Peripheral	Bacteria	Proteobacteria	Gammaproteobacteria	Diplorickettsiales	Diplorickettsiaceae	Aquicella	#N/A
adedee16cb9f5d9a51b846f4ae01c776	B2046_o_NA	5	5.19428e-06	0	-1.07902	#N/A	Peripheral	Bacteria	Chloroflexi	Anaerolineae	#N/A	#N/A	#N/A	#N/A
AJ390483.1.1340	B1972_Pir2 lineage	5	2.88178e-05	0.32	-0.952184	#N/A	Peripheral	Bacteria	Planctomycetes	Planctomycetacia	Pirellulales	Pirellulaceae	Pir2 lineage	#N/A
AJ534630.1.1307	B1308_uncultured soil bacterium	5	8.02572e-07	0.48	-1.24703	#N/A	Peripheral	Bacteria	Proteobacteria	Deltaproteobacteria	Myxococcales	BIrii41	uncultured soil bacterium	uncultured soil bacterium
AM935671.1.1324	B1197_anaerobic bacterium MO-CFX2	5	0	0	-0.841946	#N/A	Peripheral	Bacteria	Chloroflexi	Anaerolineae	SBR1031	anaerobic bacterium MO-CFX2	anaerobic bacterium MO-CFX2	anaerobic bacterium MO-CFX2
c01ad7f9df4e388f3cce0532b2ed74d7	B13771_Cytophaga	5	0	0	-0.902177	#N/A	Peripheral	Bacteria	Bacteroidetes	Bacteroidia	Cytophagales	Cytophagaceae	Cytophaga	Hypsibius dujardini
cca728c8421b376dcd833189e0db813b	B6410_uncultured	5	0	0	-0.83661	#N/A	Peripheral	Bacteria	Chloroflexi	Anaerolineae	Anaerolineales	Anaerolineaceae	uncultured	#N/A
CU466773.2.1368	B584_uncultured delta proteobacterium	5	1.45728e-05	0	-1.07902	#N/A	Peripheral	Bacteria	Proteobacteria	Deltaproteobacteria	Myxococcales	uncultured	uncultured delta proteobacterium	uncultured delta proteobacterium
d03c33a26df5ee8983340b3e0d8e77c3	B12272_f_Parachlamydiaceae	5	0	0	-0.83661	#N/A	Peripheral	Bacteria	Chlamydiae	Chlamydiae	Chlamydiales	Parachlamydiaceae	#N/A	#N/A
EF589990.1.1356	B5805_uncultured bacterium	5	2.38371e-06	0.32	-1.16302	#N/A	Peripheral	Bacteria	Cyanobacteria	Sericytochromatia	uncultured bacterium	uncultured bacterium	uncultured bacterium	uncultured bacterium
ef8191c7a19de0e808013f3f1b0950b9	B3725_Coxiella	5	0	0.32	-0.952184	#N/A	Peripheral	Bacteria	Proteobacteria	Gammaproteobacteria	Coxiellales	Coxiellaceae	Coxiella	#N/A
EU134602.1.1355	B12028_uncultured Elusimicrobia bacterium	5	0	0	-0.902177	#N/A	Peripheral	Bacteria	Elusimicrobia	Lineage IIa	uncultured Elusimicrobia bacterium	uncultured Elusimicrobia bacterium	uncultured Elusimicrobia bacterium	uncultured Elusimicrobia bacterium
FJ802272.1.1201	B1834_uncultured	5	0	0	-0.824451	#N/A	Peripheral	Bacteria	Chloroflexi	Anaerolineae	Anaerolineales	Anaerolineaceae	uncultured	#N/A
FJ824040.1.1411	B2571_Pir4 lineage	5	0	0.32	-0.952184	#N/A	Peripheral	Bacteria	Planctomycetes	Planctomycetacia	Pirellulales	Pirellulaceae	Pir4 lineage	#N/A
FPLS01009302.2.1274	B1887_f_env.OPS 17	5	0	0	-0.902177	#N/A	Peripheral	Bacteria	Bacteroidetes	Bacteroidia	Sphingobacteriales	env.OPS 17	#N/A	#N/A
GQ054472.1.1351	B4929_Aquicella	5	0	0.32	-0.868357	#N/A	Peripheral	Bacteria	Proteobacteria	Gammaproteobacteria	Diplorickettsiales	Diplorickettsiaceae	Aquicella	#N/A
GQ074238.1.1357	B8020_Aquicella	5	0	0	-0.804825	#N/A	Peripheral	Bacteria	Proteobacteria	Gammaproteobacteria	Diplorickettsiales	Diplorickettsiaceae	Aquicella	#N/A
HM445244.1.1378	B2852_Subgroup 10	5	0	0	-0.83661	#N/A	Peripheral	Bacteria	Acidobacteria	Thermoanaerobaculia	Thermoanaerobaculales	Thermoanaerobaculaceae	Subgroup 10	#N/A
HQ674888.1.1493	B1051_uncultured	5	0	0	-0.841946	#N/A	Peripheral	Bacteria	Bacteroidetes	Bacteroidia	Cytophagales	Microscillaceae	uncultured	Bacteroidetes bacterium N2
JN023222.1.1453	B13143_Granulicella	5	0	0.32	-0.952184	#N/A	Peripheral	Bacteria	Acidobacteria	Acidobacteriia	Acidobacteriales	Acidobacteriaceae (Subgroup 1)	Granulicella	#N/A
JN409016.1.1487	B3855_o_NA	5	0	0	-0.841946	#N/A	Peripheral	Bacteria	Acidobacteria	Blastocatellia (Subgroup 4)	#N/A	#N/A	#N/A	#N/A
JX223829.1.1273	B11556_o_Clostridiales	5	0	0	-0.83661	#N/A	Peripheral	Bacteria	Firmicutes	Clostridia	Clostridiales	#N/A	#N/A	#N/A
KY283062.1.1416	B13466_Nostoc PCC-7524	5	0	0.32	-0.930649	#N/A	Peripheral	Bacteria	Cyanobacteria	Oxyphotobacteria	Nostocales	Nostocaceae	Nostoc PCC-7524	#N/A
LN563642.1.1334	B1165_o_RBG-13-54-9	5	0	0	-0.841946	#N/A	Peripheral	Bacteria	Chloroflexi	Anaerolineae	RBG-13-54-9	#N/A	#N/A	#N/A
03e75ce605792c20ea77d5cf7cab0711	F4942_o_NA	5	0	0	-0.804825	#N/A	Peripheral	Fungi	#N/A	#N/A	#N/A	#N/A	#N/A	#N/A
2e02b1b5265fe099ceadd0266ed569a5	F4537_unidentified	5	0	0.32	-0.868357	#N/A	Peripheral	Fungi	unidentified	unidentified	unidentified	unidentified	unidentified	unidentified
3373c1399bcb3214acc64bf855283fb0	F511_o_NA	5	0	0	-1.07902	#N/A	Peripheral	Fungi	#N/A	#N/A	#N/A	#N/A	#N/A	#N/A
5342557f410e55563fa7b4e32781bd31	F1461_o_NA	5	0	0	-1.07902	#N/A	Peripheral	Fungi	#N/A	#N/A	#N/A	#N/A	#N/A	#N/A
634d766e9c9172fd95b034d38c25fb88	F904_unidentified	5	0.000203761	0.32	-1.16302	#N/A	Peripheral	Fungi	unidentified	unidentified	unidentified	unidentified	unidentified	unidentified
7f2e059e55375b994e46d15d02c11e39	F4054_o_NA	5	0	0	-0.824451	#N/A	Peripheral	Fungi	#N/A	#N/A	#N/A	#N/A	#N/A	#N/A
ce582a84602f8d4a25b84db656f22025	F3274_o_NA	5	0	0	-0.804825	#N/A	Peripheral	Fungi	#N/A	#N/A	#N/A	#N/A	#N/A	#N/A
d82f922833827bb3db0c374b06a64124	F1593_o_NA	5	0	0	-1.07902	#N/A	Peripheral	Fungi	#N/A	#N/A	#N/A	#N/A	#N/A	#N/A
dee55d198bd330036d38237c3dcb65f8	F554_o_NA	5	0	0	-1.07902	#N/A	Peripheral	Fungi	Ascomycota	#N/A	#N/A	#N/A	#N/A	#N/A
eb55bcfb37556ac6a64ff014b40bf89f	F4282_unidentified	5	0	0	-0.804825	#N/A	Peripheral	Fungi	unidentified	unidentified	unidentified	unidentified	unidentified	unidentified
ee006cb4350979b25081ef05325645b0	F464_o_NA	5	0	0	-1.07902	#N/A	Peripheral	Fungi	#N/A	#N/A	#N/A	#N/A	#N/A	#N/A
f5c1778d255e597d74de1d50344797e6	F1597_o_NA	5	1.93361e-07	0.32	-0.616581	#N/A	Peripheral	Fungi	#N/A	#N/A	#N/A	#N/A	#N/A	#N/A
f5d9ff73e1651b32d3212a2995c478d7	F5480_unidentified	5	0	0	-0.841946	#N/A	Peripheral	Fungi	unidentified	unidentified	unidentified	unidentified	unidentified	unidentified
fcae765c645352d06add327ddc64b6bc	F4686_unidentified	5	0	0	-0.902177	#N/A	Peripheral	Fungi	Rozellomycota	unidentified	unidentified	unidentified	unidentified	unidentified
fe729707b75b1ac9ce1aa788607f0b7b	F2137_unidentified	5	1.0314e-05	0	-1.07902	#N/A	Peripheral	Fungi	unidentified	unidentified	unidentified	unidentified	unidentified	unidentified
SH174412.07FU_KY105367_reps	F1027_Nadsonia	5	0	0	-1.07902	#N/A	Peripheral	Fungi	Ascomycota	Saccharomycetes	Saccharomycetales	Saccharomycetales_fam_Incertae_sedis	Nadsonia	Nadsonia_fulvescens
SH181637.07FU_JN809912_reps	F624_Vishniacozyma	5	2.77618e-06	0.48	-1.057	#N/A	Peripheral	Fungi	Basidiomycota	Tremellomycetes	Tremellales	Bulleribasidiaceae	Vishniacozyma	unidentified
026af1feeaf2c3beea72fbd6e06768c3	B7084_uncultured	4	0	0	-1.02879	#N/A	Peripheral	Bacteria	Chloroflexi	Anaerolineae	Anaerolineales	Anaerolineaceae	uncultured	#N/A
12df8c917d79073c6f2d106c54aa1185	B5567_f_P3OB-42	4	0	0	-0.930649	#N/A	Peripheral	Bacteria	Proteobacteria	Deltaproteobacteria	Myxococcales	P3OB-42	#N/A	#N/A
130377e94fc299cf8555cfbda7627519	B4044_uncultured soil bacterium	4	4.63728e-05	0	-1.16302	#N/A	Peripheral	Bacteria	Chloroflexi	Chloroflexia	Thermomicrobiales	JG30-KF-CM45	uncultured soil bacterium	uncultured soil bacterium
27148096e2e5ba39282756384b735d09	B12469_Cyanothece PCC-7424	4	0	0	-0.870768	#N/A	Peripheral	Bacteria	Cyanobacteria	Oxyphotobacteria	Nostocales	Microcystaceae	Cyanothece PCC-7424	Cyanothece sp. Vietnam 01
2dac227d583a7018b2e569a4fcff6a90	B3738_uncultured bacterium	4	9.56056e-09	0	-0.869499	#N/A	Peripheral	Bacteria	Hydrogenedentes	Hydrogenedentia	Hydrogenedentiales	Hydrogenedensaceae	uncultured bacterium	uncultured bacterium
50757b392c708daa590bd8bce86f59c5	B3918_Leptolyngbya ANT.L52.2	4	0	0	-1.16302	#N/A	Peripheral	Bacteria	Cyanobacteria	Oxyphotobacteria	Oxyphotobacteria Incertae Sedis	Unknown Family	Leptolyngbya ANT.L52.2	#N/A
50fa02b4946ae5e169efb2946fb74e25	B8218_uncultured planctomycete	4	0	0.375	-0.907743	#N/A	Peripheral	Bacteria	Planctomycetes	Phycisphaerae	Tepidisphaerales	WD2101 soil group	uncultured planctomycete	uncultured planctomycete
58f2b3c712bfa98f8d269e9b652cfe58	B317_uncultured bacterium	4	3.63259e-05	0	-1.16302	#N/A	Peripheral	Bacteria	Chloroflexi	NLS2-31	uncultured bacterium	uncultured bacterium	uncultured bacterium	uncultured bacterium
5b7ba5fd4b5a2b8938f262afbe355cf8	B11588_uncultured	4	0	0	-0.860504	#N/A	Peripheral	Bacteria	Gemmatimonadetes	Gemmatimonadetes	Gemmatimonadales	Gemmatimonadaceae	uncultured	Gemmatimonadetes bacterium SCN 70-22
65230b9d55837907a8cf20814bffca4f	B10538_uncultured bacterium	4	0	0	-0.860504	#N/A	Peripheral	Bacteria	Planctomycetes	Phycisphaerae	Pla1 lineage	uncultured bacterium	uncultured bacterium	uncultured bacterium
76b14c02cee2f78ddb22b57d52cc64e4	B10956_Gemmatirosa	4	0	0	-0.836915	#N/A	Peripheral	Bacteria	Gemmatimonadetes	Gemmatimonadetes	Gemmatimonadales	Gemmatimonadaceae	Gemmatirosa	uncultured soil bacterium
94333cd6dac0ce61a707ca261320a719	B10631_uncultured	4	0	0	-0.836915	#N/A	Peripheral	Bacteria	Chloroflexi	Anaerolineae	Caldilineales	Caldilineaceae	uncultured	uncultured Chloroflexia bacterium
97c7bea73772c226639a02bd2b63c05b	B4233_Candidatus Solibacter	4	0	0	-1.02879	#N/A	Peripheral	Bacteria	Acidobacteria	Acidobacteriia	Solibacterales	Solibacteraceae (Subgroup 3)	Candidatus Solibacter	uncultured Acidobacteriales bacterium
a704217d9fc4e702dd721d2c362d5185	B2290_uncultured bacterium KF-JG30-B11	4	0	0	-1.16302	#N/A	Peripheral	Bacteria	Bacteroidetes	Ignavibacteria	OPB56	uncultured bacterium KF-JG30-B11	uncultured bacterium KF-JG30-B11	uncultured bacterium KF-JG30-B11
AB114618.1.1451	B10548_f_Burkholderiaceae	4	0	0	-0.88091	#N/A	Peripheral	Bacteria	Proteobacteria	Gammaproteobacteria	Betaproteobacteriales	Burkholderiaceae	#N/A	#N/A
AB240242.1.1484	B6542_uncultured prokaryote	4	0	0	-1.16302	#N/A	Peripheral	Bacteria	Bacteroidetes	Bacteroidia	Bacteroidales	Bacteroidetes vadinHA17	uncultured prokaryote	uncultured prokaryote
AB240329.1.1447	B11399_uncultured	4	0	0	-1.02879	#N/A	Peripheral	Bacteria	Proteobacteria	Alphaproteobacteria	Rhizobiales	Xanthobacteraceae	uncultured	#N/A
AB630906.1.1481	B4824_Lacunisphaera	4	0	0	-0.88091	#N/A	Peripheral	Bacteria	Verrucomicrobia	Verrucomicrobiae	Opitutales	Opitutaceae	Lacunisphaera	#N/A
AM403313.1.1279	B2286_uncultured Bacteroidetes bacterium	4	0	0.375	-0.907743	#N/A	Peripheral	Bacteria	Bacteroidetes	Bacteroidia	Sphingobacteriales	KD3-93	uncultured Bacteroidetes bacterium	uncultured Bacteroidetes bacterium
AY913244.1.1433	B3108_uncultured Rhodospirillaceae bacterium	4	0	0	-0.869499	#N/A	Peripheral	Bacteria	Proteobacteria	Alphaproteobacteria	Elsterales	uncultured	uncultured Rhodospirillaceae bacterium	uncultured Rhodospirillaceae bacterium
b5d09a5bd96b5665e9be930d317d85a9	B8152_uncultured soil bacterium	4	0	0	-0.869499	#N/A	Peripheral	Bacteria	Proteobacteria	Gammaproteobacteria	HOC36	uncultured soil bacterium	uncultured soil bacterium	uncultured soil bacterium
DQ431004.1.1441	B4275_JSC-12	4	5.0104e-06	0	-1.16302	#N/A	Peripheral	Bacteria	Cyanobacteria	Oxyphotobacteria	Leptolyngbyales	Leptolyngbyaceae	JSC-12	cf. Leptolyngbya sp. Greenland_9
e6c5fe6e574d03d90679c00ddf5d9be6	B14155_uncultured bacterium	4	0	0	-0.930649	#N/A	Peripheral	Bacteria	Omnitrophicaeota	uncultured bacterium	uncultured bacterium	uncultured bacterium	uncultured bacterium	uncultured bacterium
e7f9fe761fd9d6b3b198cd25d38fa11f	B10388_o_NA	4	0	0	-0.860504	#N/A	Peripheral	Bacteria	#N/A	#N/A	#N/A	#N/A	#N/A	#N/A
EF515890.1.1410	B2845_uncultured bacterium	4	0	0.375	-1.24703	#N/A	Peripheral	Bacteria	Elusimicrobia	Elusimicrobia	MVP-88	uncultured bacterium	uncultured bacterium	uncultured bacterium
EU196345.1.1384	B11109_Pedobacter	4	0	0	-0.869499	#N/A	Peripheral	Bacteria	Bacteroidetes	Bacteroidia	Sphingobacteriales	Sphingobacteriaceae	Pedobacter	Pedobacter sp. NP11
f04bcd50fb7bcd7bc340745cd878d70c	B8739_uncultured bacterium	4	0	0	-1.16302	#N/A	Peripheral	Bacteria	Latescibacteria	uncultured bacterium	uncultured bacterium	uncultured bacterium	uncultured bacterium	uncultured bacterium
f54ef033c530da72c0e7270ab4a1a24b	B10740_Bdellovibrio	4	0	0.375	-0.98029	#N/A	Peripheral	Bacteria	Proteobacteria	Deltaproteobacteria	Bdellovibrionales	Bdellovibrionaceae	Bdellovibrio	Bdellovibrionales bacterium RIFCSPHIGHO2_01_FULL_40_29
FJ484748.1.1404	B4206_Spirochaeta 2	4	0	0	-1.16302	#N/A	Peripheral	Bacteria	Spirochaetes	Spirochaetia	Spirochaetales	Spirochaetaceae	Spirochaeta 2	uncultured soil bacterium
FJ936807.1.1478	B2848_Fonticella	4	0	0	-1.16302	#N/A	Peripheral	Bacteria	Firmicutes	Clostridia	Clostridiales	Clostridiaceae 1	Fonticella	#N/A
FQ659939.1.1325	B2174_uncultured	4	0	0	-1.02879	#N/A	Peripheral	Bacteria	Chloroflexi	Anaerolineae	Caldilineales	Caldilineaceae	uncultured	uncultured soil bacterium
GQ043454.1.1357	B10309_f_Chitinophagaceae	4	0	0	-0.870768	#N/A	Peripheral	Bacteria	Bacteroidetes	Bacteroidia	Chitinophagales	Chitinophagaceae	#N/A	#N/A
GQ889475.1.1373	B2162_Gemmata	4	0	0.375	-0.98029	#N/A	Peripheral	Bacteria	Planctomycetes	Planctomycetacia	Gemmatales	Gemmataceae	Gemmata	#N/A
HM341141.1.1390	B8067_uncultured Pedosphaera sp.	4	0	0	-0.88091	#N/A	Peripheral	Bacteria	Verrucomicrobia	Verrucomicrobiae	Pedosphaerales	Pedosphaeraceae	uncultured Pedosphaera sp.	uncultured Pedosphaera sp.
HM438343.1.1441	B4500_Altererythrobacter	4	0	0.375	-0.907743	#N/A	Peripheral	Bacteria	Proteobacteria	Alphaproteobacteria	Sphingomonadales	Sphingomonadaceae	Altererythrobacter	#N/A
HQ697454.1.1513	B1531_Gaiella sp. EBR4-RS1	4	6.19228e-06	0	-1.16302	#N/A	Peripheral	Bacteria	Actinobacteria	Thermoleophilia	Gaiellales	uncultured	Gaiella sp. EBR4-RS1	Gaiella sp. EBR4-RS1
JN038836.1.1493	B3624_Candidatus Methylospira	4	0	0	-0.870768	#N/A	Peripheral	Bacteria	Proteobacteria	Gammaproteobacteria	Methylococcales	Methylococcaceae	Candidatus Methylospira	uncultured gamma proteobacterium
KF515268.1.1509	B1689_Haliangium	4	0	0	-0.869499	#N/A	Peripheral	Bacteria	Proteobacteria	Deltaproteobacteria	Myxococcales	Haliangiaceae	Haliangium	#N/A
KJ808093.1.1493	B2853_Nannocystis	4	4.83148e-07	0	-1.16302	#N/A	Peripheral	Bacteria	Proteobacteria	Deltaproteobacteria	Myxococcales	Nannocystaceae	Nannocystis	metagenome
KM221441.1.1482	B7629_f_Isosphaeraceae	4	0	0	-0.930649	#N/A	Peripheral	Bacteria	Planctomycetes	Planctomycetacia	Isosphaerales	Isosphaeraceae	#N/A	#N/A
LN570440.1.1296	B9903_SWB02	4	0	0.375	-0.95912	#N/A	Peripheral	Bacteria	Proteobacteria	Alphaproteobacteria	Caulobacterales	Hyphomonadaceae	SWB02	metagenome
0415302e2cf4301b50f741a1351187ed	F3497_unidentified	4	0	0	-0.869499	#N/A	Peripheral	Fungi	unidentified	unidentified	unidentified	unidentified	unidentified	unidentified
32d43bf93bc0038c0d5f1bc60c47729b	F3074_o_NA	4	0	0.375	-0.907743	#N/A	Peripheral	Fungi	#N/A	#N/A	#N/A	#N/A	#N/A	#N/A
485d9a4c9ef06721532edb00b174d520	F5622_unidentified	4	0	0	-0.836915	#N/A	Peripheral	Fungi	unidentified	unidentified	unidentified	unidentified	unidentified	unidentified
707fc9db768acc54229a996e18290d15	F1744_unidentified	4	0	0.375	-0.907743	#N/A	Peripheral	Fungi	Rozellomycota	unidentified	unidentified	unidentified	unidentified	unidentified
8c94edec853eb2dbd97adcbdcd7de9f4	F3343_o_NA	4	0	0	-1.16302	#N/A	Peripheral	Fungi	#N/A	#N/A	#N/A	#N/A	#N/A	#N/A
a0568667fee8557c915105c86cc776d2	F243_o_NA	4	0	0.375	-0.907743	#N/A	Peripheral	Fungi	Ascomycota	Leotiomycetes	#N/A	#N/A	#N/A	#N/A
a22b12b58d343b77c80c1defab4790f7	F1285_o_NA	4	0	0	-0.836915	#N/A	Peripheral	Fungi	#N/A	#N/A	#N/A	#N/A	#N/A	#N/A
cbc89613c3b83a57fd763d46619db930	F1110_o_NA	4	0	0	-0.860504	#N/A	Peripheral	Fungi	#N/A	#N/A	#N/A	#N/A	#N/A	#N/A
d93c2124a507f70192fafa0a18339fe5	F1047_o_NA	4	1.97481e-06	0	-1.16302	#N/A	Peripheral	Fungi	#N/A	#N/A	#N/A	#N/A	#N/A	#N/A
effe3e0ddf49305e5946e2681e167e98	F3585_o_NA	4	0	0	-1.02879	#N/A	Peripheral	Fungi	#N/A	#N/A	#N/A	#N/A	#N/A	#N/A
f0a96c09f5cbb3c6b08678f5d102feb6	F3202_unidentified	4	1.19973e-05	0.375	-1.24703	#N/A	Peripheral	Fungi	unidentified	unidentified	unidentified	unidentified	unidentified	unidentified
ff136fa06d00393c2d7be2efa9ad24fc	F1878_unidentified	4	0	0	-1.02879	#N/A	Peripheral	Fungi	unidentified	unidentified	unidentified	unidentified	unidentified	unidentified
SH177547.07FU_FN397267_reps	F6285_Zopfiella	4	0	0	-0.836915	#N/A	Peripheral	Fungi	Ascomycota	Sordariomycetes	Sordariales	Chaetomiaceae	Zopfiella	unidentified
SH179975.07FU_KT362129_reps	F200_Rhizoctonia	4	0	0.375	-0.907743	#N/A	Peripheral	Fungi	Basidiomycota	Agaricomycetes	Cantharellales	Ceratobasidiaceae	Rhizoctonia	Rhizoctonia_oryzae-sativae
cfc7290918cb2008e83a83d1a3b01ece	A1115_uncultured archaeon	3	0	0	-0.869004	#N/A	Peripheral	Archaea	Nanoarchaeaeota	Woesearchaeia	uncultured archaeon	uncultured archaeon	uncultured archaeon	uncultured archaeon
14f8c19237a994a51c4e5aa238689218	B10674_Haliangium	3	0	0.444444	-0.947128	#N/A	Peripheral	Bacteria	Proteobacteria	Deltaproteobacteria	Myxococcales	Haliangiaceae	Haliangium	uncultured Kofleria sp.
15be5b54762fa657c19798ccf7f61e89	B2787_f_WD2101 soil group	3	0	0	-0.919875	#N/A	Peripheral	Bacteria	Planctomycetes	Phycisphaerae	Tepidisphaerales	WD2101 soil group	#N/A	#N/A
1a35802c0380e87d55328c856385b616	B575_f_A4b	3	0	0	-0.95912	#N/A	Peripheral	Bacteria	Chloroflexi	Anaerolineae	SBR1031	A4b	#N/A	#N/A
313546092ca4fb35a164f79b7cf0fb4c	B11239_bacterium RS46G	3	0	0	-1.24703	#N/A	Peripheral	Bacteria	Verrucomicrobia	Verrucomicrobiae	Pedosphaerales	Pedosphaeraceae	bacterium RS46G	bacterium RS46G
33aabd31de615036f032aa7175e646e7	B7232_f_Methylococcaceae	3	0	0	-0.902389	#N/A	Peripheral	Bacteria	Proteobacteria	Gammaproteobacteria	Methylococcales	Methylococcaceae	#N/A	#N/A
5222c125cd45f950d1c6c4ba997bf552	B8219_f_Chloroflexaceae	3	0	0	-1.24703	#N/A	Peripheral	Bacteria	Chloroflexi	Chloroflexia	Chloroflexales	Chloroflexaceae	#N/A	#N/A
5e88131ceb66f80c463d03986ae890a8	B1294_uncultured bacterium	3	0	0	-1.05745	#N/A	Peripheral	Bacteria	Chloroflexi	TK10	uncultured bacterium	uncultured bacterium	uncultured bacterium	uncultured bacterium
6617e5d5b0907f9a0e601c6687182893	B3833_uncultured bacterium	3	0	0.444444	-1.0084	#N/A	Peripheral	Bacteria	Latescibacteria	uncultured bacterium	uncultured bacterium	uncultured bacterium	uncultured bacterium	uncultured bacterium
6c719d90d2e7224c06ba6ae9526b292d	B3314_f_env.OPS 17	3	0	0	-0.869004	#N/A	Peripheral	Bacteria	Bacteroidetes	Bacteroidia	Sphingobacteriales	env.OPS 17	#N/A	#N/A
72d33d8c77db239a53f1f7cb1b15e02e	B1453_f_WD2101 soil group	3	0	0	-0.95912	#N/A	Peripheral	Bacteria	Planctomycetes	Phycisphaerae	Tepidisphaerales	WD2101 soil group	#N/A	#N/A
78a01b5f8418fd43ae5ccc6d7b4ee928	B2514_Thermoanaerobaculum	3	0	0.444444	-1.0084	#N/A	Peripheral	Bacteria	Acidobacteria	Thermoanaerobaculia	Thermoanaerobaculales	Thermoanaerobaculaceae	Thermoanaerobaculum	#N/A
80f3a0341df05888ba8f94732234361c	B1953_o_RBG-13-54-9	3	0	0	-0.906056	#N/A	Peripheral	Bacteria	Chloroflexi	Anaerolineae	RBG-13-54-9	#N/A	#N/A	#N/A
8156f7f1c77a6817b3777a50634a3541	B2882_f_Pedosphaeraceae	3	0	0	-0.902389	#N/A	Peripheral	Bacteria	Verrucomicrobia	Verrucomicrobiae	Pedosphaerales	Pedosphaeraceae	#N/A	#N/A
856eabbd792b0e9078f1853fa0cc4775	B13536_o_NA	3	0	0	-0.896558	#N/A	Peripheral	Bacteria	Elusimicrobia	Lineage IIa	#N/A	#N/A	#N/A	#N/A
9f88932d7b4beef571a731273fdf20a9	B6059_uncultured Banisveld landfill bacterium BVC56	3	0	0	-1.24703	#N/A	Peripheral	Bacteria	Omnitrophicaeota	uncultured Banisveld landfill bacterium BVC56	uncultured Banisveld landfill bacterium BVC56	uncultured Banisveld landfill bacterium BVC56	uncultured Banisveld landfill bacterium BVC56	uncultured Banisveld landfill bacterium BVC56
AB487835.1.1352	B12250_Oxobacter	3	0	0	-0.906056	#N/A	Peripheral	Bacteria	Firmicutes	Clostridia	Clostridiales	Clostridiaceae 1	Oxobacter	uncultured bacterium
AB696289.1.1407	B1624_o_uncultured	3	0	0	-1.24703	#N/A	Peripheral	Bacteria	Actinobacteria	Acidimicrobiia	uncultured	#N/A	#N/A	#N/A
AF143692.1.1483	B12669_Clostridium sensu stricto 1	3	0	0	-1.05745	#N/A	Peripheral	Bacteria	Firmicutes	Clostridia	Clostridiales	Clostridiaceae 1	Clostridium sensu stricto 1	Clostridium gasigenes
AY212574.1.1520	B1725_Cellvibrio	3	5.64288e-06	0	-1.24703	#N/A	Peripheral	Bacteria	Proteobacteria	Gammaproteobacteria	Cellvibrionales	Cellvibrionaceae	Cellvibrio	uncultured Cellvibrio sp.
AY947969.1.1444	B3193_f_env.OPS 17	3	0	0	-0.902389	#N/A	Peripheral	Bacteria	Bacteroidetes	Bacteroidia	Sphingobacteriales	env.OPS 17	#N/A	#N/A
c17db1dbc35d043d10eb80dffe6ac888	B3759_f_Pirellulaceae	3	0	0.444444	-0.947128	#N/A	Peripheral	Bacteria	Planctomycetes	Planctomycetacia	Pirellulales	Pirellulaceae	#N/A	#N/A
d00e23c1aaee8b7c5851ac30beefff75	B9101_Ohtaekwangia	3	0	0	-0.95912	#N/A	Peripheral	Bacteria	Bacteroidetes	Bacteroidia	Cytophagales	Microscillaceae	Ohtaekwangia	metagenome
d8263b6f131b0a8477d37a8da05df0fa	B11513_uncultured verrucomicrobium DEV008	3	0	0.444444	-0.947128	#N/A	Peripheral	Bacteria	Verrucomicrobia	Verrucomicrobiae	Pedosphaerales	Pedosphaeraceae	uncultured verrucomicrobium DEV008	uncultured verrucomicrobium DEV008
d91fdcc2ba0cc6bf8f791db484a0302f	B5073_Spirochaeta 2	3	0	0	-0.95912	#N/A	Peripheral	Bacteria	Spirochaetes	Spirochaetia	Spirochaetales	Spirochaetaceae	Spirochaeta 2	#N/A
e3631e7ac733131de72f8065157f831c	B8584_uncultured bacterium	3	0	0	-1.24703	#N/A	Peripheral	Bacteria	Elusimicrobia	Elusimicrobia	MVP-88	uncultured bacterium	uncultured bacterium	uncultured bacterium
ee3c1e3c53996a01521811e78b293dd8	B8240_uncultured Chloroflexi bacterium	3	0	0	-0.906056	#N/A	Peripheral	Bacteria	Chloroflexi	Chloroflexia	Thermomicrobiales	JG30-KF-CM45	uncultured Chloroflexi bacterium	uncultured Chloroflexi bacterium
EU104288.1.1454	B11644_uncultured	3	0	0	-0.902389	#N/A	Peripheral	Bacteria	Bacteroidetes	Bacteroidia	Cytophagales	Microscillaceae	uncultured	Hassallia byssoidea VB512170
EU134497.1.1336	B8305_OM27 clade	3	0	0	-1.24703	#N/A	Peripheral	Bacteria	Proteobacteria	Deltaproteobacteria	Bdellovibrionales	Bdellovibrionaceae	OM27 clade	uncultured bacterium
EU214535.1.1376	B11430_Dehalobacter	3	0	0	-0.896558	#N/A	Peripheral	Bacteria	Firmicutes	Clostridia	Clostridiales	Peptococcaceae	Dehalobacter	#N/A
f019efaf8601fde63648584aae53d14b	B1877_uncultured	3	0	0	-0.98029	#N/A	Peripheral	Bacteria	Planctomycetes	Planctomycetacia	Pirellulales	Pirellulaceae	uncultured	uncultured soil bacterium
f48c672455e58e9d799f02beb2ecdb5d	B5682_f_Sandaracinaceae	3	0	0	-1.24703	#N/A	Peripheral	Bacteria	Proteobacteria	Deltaproteobacteria	Myxococcales	Sandaracinaceae	#N/A	#N/A
fda9cf04e4e288d23f99fe67ad3f62db	B6829_Desulfomonile	3	0	0	-0.907743	#N/A	Peripheral	Bacteria	Proteobacteria	Deltaproteobacteria	Syntrophobacterales	Syntrophaceae	Desulfomonile	#N/A
FPLS01003241.9.1517	B12047_Nannocystis	3	0	0	-1.24703	#N/A	Peripheral	Bacteria	Proteobacteria	Deltaproteobacteria	Myxococcales	Nannocystaceae	Nannocystis	#N/A
FQ660158.1.1291	B5830_uncultured	3	0	0	-1.24703	#N/A	Peripheral	Bacteria	Chloroflexi	Chloroflexia	Chloroflexales	Roseiflexaceae	uncultured	uncultured soil bacterium
HM268815.1.1377	B620_uncultured proteobacterium	3	0	0	-0.869004	#N/A	Peripheral	Bacteria	Acidobacteria	Holophagae	Subgroup 7	uncultured proteobacterium	uncultured proteobacterium	uncultured proteobacterium
JF185859.1.1335	B8919_Gemmata	3	0	0	-0.906056	#N/A	Peripheral	Bacteria	Planctomycetes	Planctomycetacia	Gemmatales	Gemmataceae	Gemmata	Gemmata sp. Ha1-2
JF235605.1.1374	B3322_uncultured gamma proteobacterium	3	1.10116e-05	0	-1.24703	#N/A	Peripheral	Bacteria	Proteobacteria	Deltaproteobacteria	Oligoflexales	0319-6G20	uncultured gamma proteobacterium	uncultured gamma proteobacterium
JF775609.1.1523	B3379_o_NB1-j	3	0	0.444444	-1.0084	#N/A	Peripheral	Bacteria	Proteobacteria	Deltaproteobacteria	NB1-j	#N/A	#N/A	#N/A
JF775613.1.1532	B2358_uncultured prokaryote	3	0	0	-1.24703	#N/A	Peripheral	Bacteria	Proteobacteria	Deltaproteobacteria	Sva0485	uncultured prokaryote	uncultured prokaryote	uncultured prokaryote
KC431923.1.1379	B1263_uncultured	3	0	0	-0.906056	#N/A	Peripheral	Bacteria	Proteobacteria	Deltaproteobacteria	Desulfarculales	Desulfarculaceae	uncultured	metagenome
KC541348.1.1555	B7441_uncultured bacterium	3	0	0	-1.24703	#N/A	Peripheral	Bacteria	Acidobacteria	Subgroup 25	uncultured bacterium	uncultured bacterium	uncultured bacterium	uncultured bacterium
KF469195.1.1450	B2230_Nevskia	3	6.83363e-06	0	-1.24703	#N/A	Peripheral	Bacteria	Proteobacteria	Gammaproteobacteria	Salinisphaerales	Solimonadaceae	Nevskia	uncultured Nevskia sp.
KF836175.1.1517	B12585_uncultured Planctomycetales bacterium	3	0	0	-0.906056	#N/A	Peripheral	Bacteria	Planctomycetes	vadinHA49	uncultured Planctomycetales bacterium	uncultured Planctomycetales bacterium	uncultured Planctomycetales bacterium	uncultured Planctomycetales bacterium
KR922266.1.1361	B2201_Sphingomonas	3	0	0	-0.896558	#N/A	Peripheral	Bacteria	Proteobacteria	Alphaproteobacteria	Sphingomonadales	Sphingomonadaceae	Sphingomonas	#N/A
22c95bc10dea384a5a2d4e437531cba1	F968_unidentified	3	0	0	-0.869004	#N/A	Peripheral	Fungi	unidentified	unidentified	unidentified	unidentified	unidentified	unidentified
3ec838df235601446179b65727c91722	F1227_unidentified	3	8.75845e-06	0	-1.24703	#N/A	Peripheral	Fungi	unidentified	unidentified	unidentified	unidentified	unidentified	unidentified
4bd1321d83ef7d2185040b5df45e0bdc	F2809_o_NA	3	0	0	-0.95912	#N/A	Peripheral	Fungi	#N/A	#N/A	#N/A	#N/A	#N/A	#N/A
5aadb511f1a74e4511b157a15d22be7a	F6041_o_NA	3	0	0	-0.902389	#N/A	Peripheral	Fungi	#N/A	#N/A	#N/A	#N/A	#N/A	#N/A
6f9a09659b38bbb7c4d92ee0dc15318d	F1132_unidentified	3	0	0	-0.869004	#N/A	Peripheral	Fungi	unidentified	unidentified	unidentified	unidentified	unidentified	unidentified
769b10c59a80165d7f74695283a79275	F5057_o_NA	3	0	0.444444	-0.947128	#N/A	Peripheral	Fungi	#N/A	#N/A	#N/A	#N/A	#N/A	#N/A
7f186f7188dd645b6fffd89e36fd76e0	F1178_unidentified	3	0	0	-0.919875	#N/A	Peripheral	Fungi	Chytridiomycota	unidentified	unidentified	unidentified	unidentified	unidentified
837e6a5a1d35529cff9d715bdc731770	F1929_o_NA	3	0	0	-0.902389	#N/A	Peripheral	Fungi	#N/A	#N/A	#N/A	#N/A	#N/A	#N/A
93560cf72cd4e05d601fbf482ff36870	F701_o_NA	3	0	0	-0.906056	#N/A	Peripheral	Fungi	Basidiomycota	Agaricomycetes	#N/A	#N/A	#N/A	#N/A
ae4426e8d39de82a051cb3cf2bf3fc04	F3951_o_NA	3	0	0	-1.24703	#N/A	Peripheral	Fungi	#N/A	#N/A	#N/A	#N/A	#N/A	#N/A
b9d970fecf4cb1199fa1ccef48c751c1	F3362_Pseudeurotium	3	0	0	-0.98029	#N/A	Peripheral	Fungi	Ascomycota	Leotiomycetes	Thelebolales	Pseudeurotiaceae	Pseudeurotium	unidentified
ca2a1eebf297ce914f83ff8cc40bf0c5	F1518_unidentified	3	0	0	-0.906056	#N/A	Peripheral	Fungi	unidentified	unidentified	unidentified	unidentified	unidentified	unidentified
da89bec9b0605ac273108b7b7140f64f	F2597_unidentified	3	0	0	-0.896558	#N/A	Peripheral	Fungi	Rozellomycota	unidentified	unidentified	unidentified	unidentified	unidentified
e34c37728de01fe0b9e5ff8f3016d06f	F907_o_NA	3	0	0	-0.869004	#N/A	Peripheral	Fungi	Chytridiomycota	#N/A	#N/A	#N/A	#N/A	#N/A
ec5a207e9ada5e735da8cfc99e447592	F5169_o_NA	3	0	0	-1.05745	#N/A	Peripheral	Fungi	#N/A	#N/A	#N/A	#N/A	#N/A	#N/A
f55d3705b7bd9076c2d73e14aaed8084	F802_o_NA	3	0	0	-0.919875	#N/A	Peripheral	Fungi	#N/A	#N/A	#N/A	#N/A	#N/A	#N/A
SH181907.07FU_HG936954_reps	F6287_Cladorrhinum	3	0	0	-0.869004	#N/A	Peripheral	Fungi	Ascomycota	Sordariomycetes	Sordariales	Lasiosphaeriaceae	Cladorrhinum	Cladorrhinum_foecundissimum
SH192619.07FU_HQ115717_reps	F3858_unidentified	3	0	0	-0.906056	#N/A	Peripheral	Fungi	Ascomycota	Dothideomycetes	Capnodiales	unidentified	unidentified	unidentified
03b6100dd58fbfd00ad23ef90256a0cc	B2722_uncultured	2	0	0	-1.33103	#N/A	Peripheral	Bacteria	Chloroflexi	Chloroflexia	Chloroflexales	Roseiflexaceae	uncultured	uncultured soil bacterium
0a75960fbd34a290ef426fc2330a251d	B4535_uncultured organism	2	0	0	-0.932611	#N/A	Peripheral	Bacteria	Kiritimatiellaeota	Kiritimatiellae	WCHB1-41	uncultured organism	uncultured organism	uncultured organism
11075e97438991b2f101f85ffd6ab4d3	B6153_uncultured bacterium	2	0	0	-1.33103	#N/A	Peripheral	Bacteria	Proteobacteria	Deltaproteobacteria	Myxococcales	mle1-27	uncultured bacterium	uncultured bacterium
19c7ef756a1c527783f2c839b5c95eaa	B2830_uncultured bacterium	2	0	0	-1.33103	#N/A	Peripheral	Bacteria	Elusimicrobia	Elusimicrobia	MVP-88	uncultured bacterium	uncultured bacterium	uncultured bacterium
1ad2bd5190e1a879ca1277fa40ee1b27	B12866_uncultured delta proteobacterium	2	0	0	-0.987591	#N/A	Peripheral	Bacteria	Proteobacteria	Deltaproteobacteria	Myxococcales	UASB-TL25	uncultured delta proteobacterium	uncultured delta proteobacterium
1b6c3a5c9ea67981033191fdaf2a3a0e	B11794_uncultured bacterium	2	0	0	-0.941344	#N/A	Peripheral	Bacteria	Chloroflexi	Anaerolineae	SBR1031	A4b	uncultured bacterium	uncultured bacterium
1e10bc8f1d6de38c5921bbfc88c82761	B1167_BSV13	2	0	0	-0.935278	#N/A	Peripheral	Bacteria	Bacteroidetes	Bacteroidia	Bacteroidales	Prolixibacteraceae	BSV13	#N/A
22c173dd32a60e4bf452524bf390b54b	B7358_Dokdonella	2	0	0.5	-0.986514	#N/A	Peripheral	Bacteria	Proteobacteria	Gammaproteobacteria	Xanthomonadales	Rhodanobacteraceae	Dokdonella	#N/A
2392a0db2aa22b1210fd0f25e8a203c9	B14808_uncultured Fusobacteria bacterium	2	0	0	-0.932611	#N/A	Peripheral	Bacteria	Hydrogenedentes	Hydrogenedentia	Hydrogenedentiales	Hydrogenedensaceae	uncultured Fusobacteria bacterium	uncultured Fusobacteria bacterium
2575a1b13c5e1185b3aa48a4213583dd	B9836_uncultured Anaerolineaceae bacterium	2	0	0	-0.947128	#N/A	Peripheral	Bacteria	Chloroflexi	Anaerolineae	RBG-13-54-9	uncultured Anaerolineaceae bacterium	uncultured Anaerolineaceae bacterium	uncultured Anaerolineaceae bacterium
30cee838c455339f2fab5067a53785de	B14421_uncultured	2	0	0	-0.932611	#N/A	Peripheral	Bacteria	Planctomycetes	Planctomycetacia	Gemmatales	Gemmataceae	uncultured	uncultured bacterium
4171c30ba983dc6a3d0a8f91b3483c65	B1207_uncultured bacterium	2	0	0	-0.901094	#N/A	Peripheral	Bacteria	Chloroflexi	Ktedonobacteria	C0119	uncultured bacterium	uncultured bacterium	uncultured bacterium
44dc1716bfe40561e30ab17b2697145f	B9600_o_NA	2	0	0	-1.33103	#N/A	Peripheral	Bacteria	#N/A	#N/A	#N/A	#N/A	#N/A	#N/A
46ecbca1426349625a4ead551ec91d84	B5670_uncultured bacterium	2	0	0	-1.33103	#N/A	Peripheral	Bacteria	Planctomycetes	Phycisphaerae	mle1-8	uncultured bacterium	uncultured bacterium	uncultured bacterium
4b6d2a2ddd98aa7a05c6849b1ecc9259	B14062_Aquicella	2	0	0	-1.08611	#N/A	Peripheral	Bacteria	Proteobacteria	Gammaproteobacteria	Diplorickettsiales	Diplorickettsiaceae	Aquicella	#N/A
5675a02e52fbfa2b178f050fe86c989b	B3545_o_Chthoniobacterales	2	0	0.5	-1.0365	#N/A	Peripheral	Bacteria	Verrucomicrobia	Verrucomicrobiae	Chthoniobacterales	#N/A	#N/A	#N/A
576727c9b3d07136f88cb1522514c944	B9331_Spirochaeta 2	2	0	0	-0.932611	#N/A	Peripheral	Bacteria	Spirochaetes	Spirochaetia	Spirochaetales	Spirochaetaceae	Spirochaeta 2	uncultured soil bacterium
5a1d02bde686681a297fd50ed21f3278	B11956_uncultured bacterium	2	0	0.5	-1.0365	#N/A	Peripheral	Bacteria	Bacteroidetes	Bacteroidia	Sphingobacteriales	env.OPS 17	uncultured bacterium	uncultured bacterium
5ca193f1995ef2c9ef8a2894eb03c084	B4262_f_AKAU3564 sediment group	2	0	0	-1.33103	#N/A	Peripheral	Bacteria	Planctomycetes	Phycisphaerae	Phycisphaerales	AKAU3564 sediment group	#N/A	#N/A
7755a845b14c38ea8f31eaf5e1fb23be	B1371_uncultured soil bacterium	2	0	0	-1.33103	#N/A	Peripheral	Bacteria	Gemmatimonadetes	S0134 terrestrial group	uncultured soil bacterium	uncultured soil bacterium	uncultured soil bacterium	uncultured soil bacterium
7975a89851fbc8c071bfe512b7c86bd7	B8889_Bdellovibrio	2	0	0	-0.958839	#N/A	Peripheral	Bacteria	Proteobacteria	Deltaproteobacteria	Bdellovibrionales	Bdellovibrionaceae	Bdellovibrio	metagenome
7e3f9191f1ed3cf1dbd28210890061f4	B2822_uncultured bacterium UASB_TL14	2	0	0	-1.33103	#N/A	Peripheral	Bacteria	Chloroflexi	Anaerolineae	RBG-13-54-9	uncultured bacterium UASB_TL14	uncultured bacterium UASB_TL14	uncultured bacterium UASB_TL14
99d604c614e4476c69c2ead53353ffb7	B7959_uncultured Caldilineae bacterium	2	0	0	-1.08611	#N/A	Peripheral	Bacteria	Chloroflexi	Anaerolineae	RBG-13-54-9	uncultured Caldilineae bacterium	uncultured Caldilineae bacterium	uncultured Caldilineae bacterium
a841c767ffb522430748025c8ed1988f	B13556_uncultured bacterium	2	0	0	-0.958839	#N/A	Peripheral	Bacteria	Elusimicrobia	Elusimicrobia	MVP-88	uncultured bacterium	uncultured bacterium	uncultured bacterium
AB488119.1.1330	B1630_uncultured bacterium	2	1.94361e-06	0	-1.33103	#N/A	Peripheral	Bacteria	Chloroflexi	Ktedonobacteria	C0119	uncultured bacterium	uncultured bacterium	uncultured bacterium
AB679970.1.1332	B13219_Sphingomonas	2	0	0	-0.941344	#N/A	Peripheral	Bacteria	Proteobacteria	Alphaproteobacteria	Sphingomonadales	Sphingomonadaceae	Sphingomonas	#N/A
AM935546.1.1393	B3497_uncultured microorganism	2	0	0	-0.958839	#N/A	Peripheral	Bacteria	Acidobacteria	Subgroup 6	uncultured microorganism	uncultured microorganism	uncultured microorganism	uncultured microorganism
AY221611.1.1499	B3225_Levilinea	2	0	0	-0.987591	#N/A	Peripheral	Bacteria	Chloroflexi	Anaerolineae	Anaerolineales	Anaerolineaceae	Levilinea	uncultured bacterium
c78d595eedd7e01379e38765fb53e68a	B13094_uncultured	2	0	0	-0.932611	#N/A	Peripheral	Bacteria	Planctomycetes	Planctomycetacia	Gemmatales	Gemmataceae	uncultured	uncultured bacterium
c855be4031935cf3200490ce83eecf52	B1215_uncultured	2	0	0	-0.987591	#N/A	Peripheral	Bacteria	Chloroflexi	Anaerolineae	Anaerolineales	Anaerolineaceae	uncultured	#N/A
c9039575fc18fadac4155d5482a08372	B12808_Haliangium	2	0	0	-1.08611	#N/A	Peripheral	Bacteria	Proteobacteria	Deltaproteobacteria	Myxococcales	Haliangiaceae	Haliangium	#N/A
cb2480734c09be587f71d6e927f2f274	B12138_o_NA	2	0	0	-0.941344	#N/A	Peripheral	Bacteria	Proteobacteria	Gammaproteobacteria	#N/A	#N/A	#N/A	#N/A
d0d1ea5885363df4ebd47f86cefb2c6c	B10807_f_0319-6G20	2	0	0.5	-0.986514	#N/A	Peripheral	Bacteria	Proteobacteria	Deltaproteobacteria	Oligoflexales	0319-6G20	#N/A	#N/A
dc063b4d6c48bc8dcbe697523913976b	B1557_uncultured proteobacterium	2	0	0	-1.33103	#N/A	Peripheral	Bacteria	Latescibacteria	uncultured proteobacterium	uncultured proteobacterium	uncultured proteobacterium	uncultured proteobacterium	uncultured proteobacterium
DQ658765.1.1386	B3742_Desulfosporosinus	2	0	0	-0.901094	#N/A	Peripheral	Bacteria	Firmicutes	Clostridia	Clostridiales	Peptococcaceae	Desulfosporosinus	#N/A
ef4f3f7fdf72da0693bfb91218c5fbe9	B13424_uncultured soil bacterium	2	0	0.5	-1.0365	#N/A	Peripheral	Bacteria	Acidobacteria	Subgroup 25	uncultured soil bacterium	uncultured soil bacterium	uncultured soil bacterium	uncultured soil bacterium
EF654708.1.1453	B13800_Bryobacter	2	0	0	-0.932611	#N/A	Peripheral	Bacteria	Acidobacteria	Acidobacteriia	Solibacterales	Solibacteraceae (Subgroup 3)	Bryobacter	metagenome
EU542532.1.1482	B2386_uncultured proteobacterium	2	0	0	-0.987591	#N/A	Peripheral	Bacteria	Acidobacteria	Subgroup 22	uncultured proteobacterium	uncultured proteobacterium	uncultured proteobacterium	uncultured proteobacterium
f0498b4589937fb529ad07fe1dba6fd5	B2373_uncultured bacterium	2	0	0	-1.33103	#N/A	Peripheral	Bacteria	Fibrobacteres	Fibrobacteria	Fibrobacterales	B122	uncultured bacterium	uncultured bacterium
f46051fd6afe5b50c86f2e7d84654aab	B7065_Haliangium	2	0	0	-1.0084	#N/A	Peripheral	Bacteria	Proteobacteria	Deltaproteobacteria	Myxococcales	Haliangiaceae	Haliangium	uncultured Nannocystineae bacterium
f887a40b2d77b32f5c97c402a0ccbe65	B14169_Bdellovibrio	2	0	0	-0.932611	#N/A	Peripheral	Bacteria	Proteobacteria	Deltaproteobacteria	Bdellovibrionales	Bdellovibrionaceae	Bdellovibrio	metagenome
f9c74f7b914297959acd0d8225e018a8	B2254_o_NA	2	0	0	-1.33103	#N/A	Peripheral	Bacteria	#N/A	#N/A	#N/A	#N/A	#N/A	#N/A
FJ152858.1.1517	B6577_uncultured Desulfovibrionales bacterium	2	0	0	-1.33103	#N/A	Peripheral	Bacteria	Proteobacteria	Deltaproteobacteria	Myxococcales	bacteriap25	uncultured Desulfovibrionales bacterium	uncultured Desulfovibrionales bacterium
FJ592599.1.1395	B4586_Paludibacter	2	0	0	-1.33103	#N/A	Peripheral	Bacteria	Bacteroidetes	Bacteroidia	Bacteroidales	Paludibacteraceae	Paludibacter	#N/A
FJ660573.1.1520	B5996_uncultured bacterium	2	0	0	-1.08611	#N/A	Peripheral	Bacteria	Elusimicrobia	Lineage IIb	uncultured bacterium	uncultured bacterium	uncultured bacterium	uncultured bacterium
FJ802196.1.1229	B3070_uncultured	2	0	0	-1.0084	#N/A	Peripheral	Bacteria	Chloroflexi	Anaerolineae	Anaerolineales	Anaerolineaceae	uncultured	#N/A
FPLL01000821.12.1485	B10064_metagenome	2	0	0	-1.33103	#N/A	Peripheral	Bacteria	Actinobacteria	Thermoleophilia	Gaiellales	uncultured	metagenome	metagenome
FPLP01008640.14.1474	B12567_f_env.OPS 17	2	0	0	-0.958839	#N/A	Peripheral	Bacteria	Bacteroidetes	Bacteroidia	Sphingobacteriales	env.OPS 17	#N/A	#N/A
FPLS01019854.14.1338	B1770_metagenome	2	0	0	-0.958839	#N/A	Peripheral	Bacteria	Proteobacteria	Deltaproteobacteria	Myxococcales	KD3-10	metagenome	metagenome
FQ658883.1.1362	B5580_uncultured soil bacterium	2	0	0	-1.33103	#N/A	Peripheral	Bacteria	Actinobacteria	Thermoleophilia	Solirubrobacterales	67-14	uncultured soil bacterium	uncultured soil bacterium
GU208341.1.1456	B3230_uncultured prokaryote	2	0	0	-1.33103	#N/A	Peripheral	Bacteria	Zixibacteria	uncultured prokaryote	uncultured prokaryote	uncultured prokaryote	uncultured prokaryote	uncultured prokaryote
HM240942.1.1312	B3853_Microcoleus PCC-7113	2	0	0	-0.932611	#N/A	Peripheral	Bacteria	Cyanobacteria	Oxyphotobacteria	Nostocales	Coleofasciculaceae	Microcoleus PCC-7113	Microcoleus sp. HTT-U-KK5
HM268970.1.1367	B2562_Prosthecobacter	2	0	0	-1.33103	#N/A	Peripheral	Bacteria	Verrucomicrobia	Verrucomicrobiae	Verrucomicrobiales	Verrucomicrobiaceae	Prosthecobacter	uncultured Prosthecobacter sp.
HQ132416.1.1498	B3131_uncultured Acidobacterium sp.	2	0	0	-0.958839	#N/A	Peripheral	Bacteria	Acidobacteria	Holophagae	Subgroup 7	uncultured Acidobacterium sp.	uncultured Acidobacterium sp.	uncultured Acidobacterium sp.
HQ184003.1.1542	B8465_uncultured	2	0	0	-1.08611	#N/A	Peripheral	Bacteria	Firmicutes	Clostridia	Clostridiales	Christensenellaceae	uncultured	uncultured Clostridiales bacterium
JN387453.1.1218	B5383_uncultured microorganism	2	0	0	-0.935278	#N/A	Peripheral	Bacteria	Fibrobacteres	Fibrobacteria	Fibrobacterales	possible family 01	uncultured microorganism	uncultured microorganism
JN398122.1.1413	B11019_uncultured	2	0	0	-1.0084	#N/A	Peripheral	Bacteria	Cyanobacteria	Oxyphotobacteria	Nostocales	Coleofasciculaceae	uncultured	uncultured bacterium
JQ978939.1.1509	B12445_Tumebacillus	2	0	0	-0.941344	#N/A	Peripheral	Bacteria	Firmicutes	Bacilli	Bacillales	Alicyclobacillaceae	Tumebacillus	bacterium YC-ZSS-LKJ142
JX133443.1.1455	B2070_uncultured bacterium	2	0	0	-1.33103	#N/A	Peripheral	Bacteria	Chloroflexi	Anaerolineae	SBR1031	A4b	uncultured bacterium	uncultured bacterium
JX222521.1.1521	B4815_[Desulfobacterium] catecholicum group	2	0	0	-0.941344	#N/A	Peripheral	Bacteria	Proteobacteria	Deltaproteobacteria	Desulfobacterales	Desulfobulbaceae	[Desulfobacterium] catecholicum group	#N/A
JX505053.1.1443	B841_uncultured bacterium DA038	2	0	0	-0.958839	#N/A	Peripheral	Bacteria	Acidobacteria	Acidobacteriia	Acidobacteriales	uncultured	uncultured bacterium DA038	uncultured bacterium DA038
KC763876.1.1305	B287_uncultured planctomycete	2	0	0	-0.941344	#N/A	Peripheral	Bacteria	Planctomycetes	Phycisphaerae	MSBL9	SG8-4	uncultured planctomycete	uncultured planctomycete
KF074751.1.1368	B2159_o_Betaproteobacteriales	2	0	0.5	-1.0365	#N/A	Peripheral	Bacteria	Proteobacteria	Gammaproteobacteria	Betaproteobacteriales	#N/A	#N/A	#N/A
KF494798.1.1496	B50_f_Micrococcaceae	2	0	0	-1.33103	#N/A	Peripheral	Bacteria	Actinobacteria	Actinobacteria	Micrococcales	Micrococcaceae	#N/A	#N/A
KX504969.1.1523	B2156_uncultured bacterium	2	0	0	-1.33103	#N/A	Peripheral	Bacteria	Proteobacteria	Deltaproteobacteria	Myxococcales	mle1-27	uncultured bacterium	uncultured bacterium
LHVT01000005.137348.138865	B5509_Flavobacterium	2	0	0	-1.33103	#N/A	Peripheral	Bacteria	Bacteroidetes	Bacteroidia	Flavobacteriales	Flavobacteriaceae	Flavobacterium	#N/A
02f691fe669790c1726c9a0bf5a23bc3	F6335_o_NA	2	0	0	-0.932611	#N/A	Peripheral	Fungi	#N/A	#N/A	#N/A	#N/A	#N/A	#N/A
1d78058f992bacdde65b467c72e43e11	F4155_o_NA	2	0	0.5	-0.986514	#N/A	Peripheral	Fungi	#N/A	#N/A	#N/A	#N/A	#N/A	#N/A
2f0b631a9272609154c3265259857aa0	F1128_unidentified	2	0	0	-1.33103	#N/A	Peripheral	Fungi	unidentified	unidentified	unidentified	unidentified	unidentified	unidentified
549b36d5c2567dfebb84e856a3f95c86	F7850_unidentified	2	0	0	-1.08611	#N/A	Peripheral	Fungi	unidentified	unidentified	unidentified	unidentified	unidentified	unidentified
6125422023af0d1a6fd11b09ae630148	F910_unidentified	2	0	0	-0.947128	#N/A	Peripheral	Fungi	unidentified	unidentified	unidentified	unidentified	unidentified	unidentified
67c818f60ca9a6047f8b34348492b095	F3013_unidentified	2	0	0	-0.941344	#N/A	Peripheral	Fungi	Ascomycota	Sordariomycetes	Hypocreales	unidentified	unidentified	unidentified
708810b91586aad9f9cfa79f505805eb	F6572_o_NA	2	0	0	-0.932611	#N/A	Peripheral	Fungi	#N/A	#N/A	#N/A	#N/A	#N/A	#N/A
c8e1cae0e9e6f7c3ea737d8b013c292c	F1789_unidentified	2	0	0	-1.08611	#N/A	Peripheral	Fungi	unidentified	unidentified	unidentified	unidentified	unidentified	unidentified
cd95cdc68a406cb97415a7c845305355	F600_unidentified	2	0	0	-1.33103	#N/A	Peripheral	Fungi	unidentified	unidentified	unidentified	unidentified	unidentified	unidentified
d5137268a4428ef4dbb2bd1467770e8b	F6793_o_NA	2	0	0	-0.932611	#N/A	Peripheral	Fungi	#N/A	#N/A	#N/A	#N/A	#N/A	#N/A
fca6d2c0a224818067be822efa7bc76e	F5179_o_NA	2	0	0	-0.932611	#N/A	Peripheral	Fungi	#N/A	#N/A	#N/A	#N/A	#N/A	#N/A
SH215453.07FU_AF444662_refs	F651_Bullera	2	0	0	-1.33103	#N/A	Peripheral	Fungi	Basidiomycota	Tremellomycetes	Tremellales	Bulleraceae	Bullera	Bullera_alba
0203f5d5030543a1bf068cef6557dff9	B1117_uncultured delta proteobacterium	1	0	0	-1.41503	#N/A	Peripheral	Bacteria	Zixibacteria	uncultured delta proteobacterium	uncultured delta proteobacterium	uncultured delta proteobacterium	uncultured delta proteobacterium	uncultured delta proteobacterium
048c7f8a0e03c0624978c5d796024ea7	B7994_uncultured bacterium	1	0	0	-1.41503	#N/A	Peripheral	Bacteria	LCP-89	uncultured bacterium	uncultured bacterium	uncultured bacterium	uncultured bacterium	uncultured bacterium
0839ecc512b35188395ad53a2e11b0ab	B13008_f_AKAU3564 sediment group	1	0	0	-0.968168	#N/A	Peripheral	Bacteria	Planctomycetes	Phycisphaerae	Phycisphaerales	AKAU3564 sediment group	#N/A	#N/A
087caf4b77a2016189da8c3f0f93405a	B1760_uncultured Acidobacteria bacterium	1	0	0	-1.41503	#N/A	Peripheral	Bacteria	Acidobacteria	Subgroup 25	uncultured Acidobacteria bacterium	uncultured Acidobacteria bacterium	uncultured Acidobacteria bacterium	uncultured Acidobacteria bacterium
0f8e73a2737d2e40315c1d8e98a14b35	B14407_o_Myxococcales	1	0	0	-0.968664	#N/A	Peripheral	Bacteria	Proteobacteria	Deltaproteobacteria	Myxococcales	#N/A	#N/A	#N/A
15c68ac76d679e722f15748bb6cac07e	B7230_f_WD2101 soil group	1	0	0	-1.01606	#N/A	Peripheral	Bacteria	Planctomycetes	Phycisphaerae	Tepidisphaerales	WD2101 soil group	#N/A	#N/A
1d491ea08afdc61da5dfcaf19c341f28	B2399_uncultured bacterium	1	0	0	-1.41503	#N/A	Peripheral	Bacteria	Verrucomicrobia	Verrucomicrobiae	S-BQ2-57 soil group	uncultured bacterium	uncultured bacterium	uncultured bacterium
2729061b74ddd921145790cece1b65aa	B1778_f_env.OPS 17	1	0	0	-1.41503	#N/A	Peripheral	Bacteria	Bacteroidetes	Bacteroidia	Sphingobacteriales	env.OPS 17	#N/A	#N/A
3d9d3ae8b35a6d8723333b773a8b21d7	B4909_o_NA	1	0	0	-1.11477	#N/A	Peripheral	Bacteria	Chloroflexi	KD4-96	#N/A	#N/A	#N/A	#N/A
3e377845796dc6aab42bdf68a434bdd0	B5839_uncultured bacterium	1	0	0	-1.41503	#N/A	Peripheral	Bacteria	Armatimonadetes	uncultured	uncultured bacterium	uncultured bacterium	uncultured bacterium	uncultured bacterium
4be91febbeba00c6db8d5b9e34929d83	B3710_metagenome	1	0	0	-0.933184	#N/A	Peripheral	Bacteria	Fibrobacteres	Fibrobacteria	Fibrobacterales	possible family 01	metagenome	metagenome
5087129c7950de57cd07afe8b83c3863	B1411_uncultured delta proteobacterium	1	0	0	-0.933184	#N/A	Peripheral	Bacteria	Proteobacteria	Deltaproteobacteria	Myxococcales	UASB-TL25	uncultured delta proteobacterium	uncultured delta proteobacterium
56cdb5241c42a5a876176febfd7d92d7	B8422_Candidatus Alysiosphaera	1	0	0	-1.41503	#N/A	Peripheral	Bacteria	Proteobacteria	Alphaproteobacteria	Tistrellales	Geminicoccaceae	Candidatus Alysiosphaera	#N/A
5bd1a6a14ca37d52519e1fd092a2815d	B7501_uncultured Sphingobacteriales bacterium	1	0	0	-1.41503	#N/A	Peripheral	Bacteria	Bacteroidetes	Bacteroidia	Sphingobacteriales	env.OPS 17	uncultured Sphingobacteriales bacterium	uncultured Sphingobacteriales bacterium
5fa8af4f8409426a2c2c4992e46928d5	B3701_o_Chthonomonadales	1	0	0	-0.968168	#N/A	Peripheral	Bacteria	Armatimonadetes	Chthonomonadetes	Chthonomonadales	#N/A	#N/A	#N/A
66a193823a3daf7b0534708c0fc6869b	B2222_o_NA	1	0	0	-0.968168	#N/A	Peripheral	Bacteria	Proteobacteria	Gammaproteobacteria	#N/A	#N/A	#N/A	#N/A
6dadfc1016913b4dcbec7d0c75443696	B14654_Candidatus Endomicrobium	1	0	0	-0.968664	#N/A	Peripheral	Bacteria	Elusimicrobia	Endomicrobia	Endomicrobiales	Endomicrobiaceae	Candidatus Endomicrobium	metagenome
7e177300c51c3222a8a3a0cf228dd959	B4193_uncultured Acidobacteriaceae bacterium	1	0	0	-0.968168	#N/A	Peripheral	Bacteria	Acidobacteria	Acidobacteriia	Acidobacteriales	uncultured	uncultured Acidobacteriaceae bacterium	uncultured Acidobacteriaceae bacterium
8033d55ae72e2ebe16e0dc2522eb256d	B11827_uncultured	1	0	0	-1.41503	#N/A	Peripheral	Bacteria	Planctomycetes	Planctomycetacia	Gemmatales	Gemmataceae	uncultured	#N/A
9f88ad2b92151ca847dd0946d2c08bbb	B936_uncultured actinobacterium	1	0	0	-0.997804	#N/A	Peripheral	Bacteria	Elusimicrobia	Lineage IIa	uncultured actinobacterium	uncultured actinobacterium	uncultured actinobacterium	uncultured actinobacterium
a90c6ee2645433ecf87d96048354e806	B13216_uncultured bacterium	1	0	0	-1.41503	#N/A	Peripheral	Bacteria	Bacteroidetes	Ignavibacteria	Kryptoniales	BSV26	uncultured bacterium	uncultured bacterium
ab0fc32e6efcee9966fb01571f3add1d	B11611_uncultured	1	0	0	-1.41503	#N/A	Peripheral	Bacteria	Chloroflexi	Chloroflexia	Chloroflexales	Roseiflexaceae	uncultured	uncultured Chloroflexi bacterium
AB128884.1.1520	B714_uncultured bacterium	1	0	0	-1.41503	#N/A	Peripheral	Bacteria	Proteobacteria	Deltaproteobacteria	Myxococcales	27F-1492R	uncultured bacterium	uncultured bacterium
AB186797.1.1510	B651_uncultured soil bacterium	1	0	0	-0.968168	#N/A	Peripheral	Bacteria	TA06	uncultured soil bacterium	uncultured soil bacterium	uncultured soil bacterium	uncultured soil bacterium	uncultured soil bacterium
AB234282.1.1515	B392_Spirochaeta 2	1	0	0	-0.986514	#N/A	Peripheral	Bacteria	Spirochaetes	Spirochaetia	Spirochaetales	Spirochaetaceae	Spirochaeta 2	Spirochaeta sp.
AB240491.1.1488	B1223_uncultured	1	0	0	-1.41503	#N/A	Peripheral	Bacteria	Bacteroidetes	Bacteroidia	Bacteroidales	Paludibacteraceae	uncultured	uncultured soil bacterium
AB486837.1.1387	B1272_o_Rokubacteriales	1	0	0	-1.41503	#N/A	Peripheral	Bacteria	Rokubacteria	NC10	Rokubacteriales	#N/A	#N/A	#N/A
AB511017.1.1476	B12526_f_Bacteriovoracaceae	1	0	0	-1.11477	#N/A	Peripheral	Bacteria	Proteobacteria	Deltaproteobacteria	Bdellovibrionales	Bacteriovoracaceae	#N/A	#N/A
AB672124.1.1411	B4255_Sphaerospermopsis BCCUSP55	1	0	0	-1.41503	#N/A	Peripheral	Bacteria	Cyanobacteria	Oxyphotobacteria	Nostocales	Nostocaceae	Sphaerospermopsis BCCUSP55	#N/A
AB672177.1.1478	B1852_uncultured bacterium	1	0	0	-0.968168	#N/A	Peripheral	Bacteria	Planctomycetes	Pla3 lineage	uncultured bacterium	uncultured bacterium	uncultured bacterium	uncultured bacterium
ad232df10aaeb6894f449cef25c64cba	B2883_f_Bacteroidetes BD2-2	1	0	0	-1.41503	#N/A	Peripheral	Bacteria	Bacteroidetes	Bacteroidia	Bacteroidales	Bacteroidetes BD2-2	#N/A	#N/A
AF523981.1.1291	B3057_Thermoanaerobaculum	1	0	0	-0.976632	#N/A	Peripheral	Bacteria	Acidobacteria	Thermoanaerobaculia	Thermoanaerobaculales	Thermoanaerobaculaceae	Thermoanaerobaculum	#N/A
AY013695.1.1571	B3112_uncultured Banisveld landfill bacterium BVC56	1	0	0	-0.968168	#N/A	Peripheral	Bacteria	Omnitrophicaeota	uncultured Banisveld landfill bacterium BVC56	uncultured Banisveld landfill bacterium BVC56	uncultured Banisveld landfill bacterium BVC56	uncultured Banisveld landfill bacterium BVC56	uncultured Banisveld landfill bacterium BVC56
AY662018.1.1497	B5991_Bdellovibrio	1	0	0	-0.968168	#N/A	Peripheral	Bacteria	Proteobacteria	Deltaproteobacteria	Bdellovibrionales	Bdellovibrionaceae	Bdellovibrio	#N/A
bf7106b7ef74ea74b6f6e7eba90f09aa	B1468_uncultured bacterium	1	0	0	-1.0365	#N/A	Peripheral	Bacteria	Zixibacteria	uncultured bacterium	uncultured bacterium	uncultured bacterium	uncultured bacterium	uncultured bacterium
c06e735bb04a62e74932834fd23fe772	B3317_metagenome	1	0	0	-1.41503	#N/A	Peripheral	Bacteria	Chloroflexi	JG30-KF-CM66	metagenome	metagenome	metagenome	metagenome
c29713f094c92b975dac0bcb197f1616	B7302_uncultured bacterium	1	0	0	-1.41503	#N/A	Peripheral	Bacteria	Bacteroidetes	Ignavibacteria	Kryptoniales	BSV26	uncultured bacterium	uncultured bacterium
c2b114fecb3e2fa7977b4fbdee208405	B6888_f_Pedosphaeraceae	1	0	0	-1.41503	#N/A	Peripheral	Bacteria	Verrucomicrobia	Verrucomicrobiae	Pedosphaerales	Pedosphaeraceae	#N/A	#N/A
c489a32a7c3f3287a08ee04e6eadbc54	B15622_uncultured soil bacterium	1	0	0	-0.976632	#N/A	Peripheral	Bacteria	Gemmatimonadetes	S0134 terrestrial group	uncultured soil bacterium	uncultured soil bacterium	uncultured soil bacterium	uncultured soil bacterium
c4d1b25c879c5080e14fd8ea17f6f5e0	B6353_Haliangium	1	0	0	-0.933184	#N/A	Peripheral	Bacteria	Proteobacteria	Deltaproteobacteria	Myxococcales	Haliangiaceae	Haliangium	#N/A
c4fa0f9221cc256fadd84bb5b10fafb6	B7270_o_Myxococcales	1	0	0	-1.41503	#N/A	Peripheral	Bacteria	Proteobacteria	Deltaproteobacteria	Myxococcales	#N/A	#N/A	#N/A
cbad99623624696a373f32d98ce34418	B854_uncultured	1	0	0	-0.997804	#N/A	Peripheral	Bacteria	Chloroflexi	Anaerolineae	Anaerolineales	Anaerolineaceae	uncultured	#N/A
d62c8a0e4118d8ffe87db04b13c45c68	B13240_o_Clostridiales	1	0	0	-1.11477	#N/A	Peripheral	Bacteria	Firmicutes	Clostridia	Clostridiales	#N/A	#N/A	#N/A
DQ444403.1.1346	B13589_uncultured	1	0	0	-1.41503	#N/A	Peripheral	Bacteria	Planctomycetes	Planctomycetacia	Gemmatales	Gemmataceae	uncultured	uncultured bacterium
e252041d60f1c9b5370e162d08fbbcf9	B2837_o_SBR1031	1	0	0	-1.41503	#N/A	Peripheral	Bacteria	Chloroflexi	Anaerolineae	SBR1031	#N/A	#N/A	#N/A
e5b8339f00d8ee0bf5c282712ff0c0f2	B15407_Coxiella	1	0	0	-0.968664	#N/A	Peripheral	Bacteria	Proteobacteria	Gammaproteobacteria	Coxiellales	Coxiellaceae	Coxiella	uncultured Coxiellaceae bacterium
e6347d021a980e153be1cdc89e5bd214	B3354_o_NA	1	0	0	-1.41503	#N/A	Peripheral	Bacteria	Latescibacteria	#N/A	#N/A	#N/A	#N/A	#N/A
e88fb4ff39bafe4f9d76d056ba188435	B14157_uncultured bacterium	1	0	0	-1.11477	#N/A	Peripheral	Bacteria	Chloroflexi	SHA-26	uncultured bacterium	uncultured bacterium	uncultured bacterium	uncultured bacterium
EU133608.1.1263	B14734_uncultured Acetobacteraceae bacterium	1	0	0	-1.0365	#N/A	Peripheral	Bacteria	Proteobacteria	Alphaproteobacteria	uncultured	uncultured Acetobacteraceae bacterium	uncultured Acetobacteraceae bacterium	uncultured Acetobacteraceae bacterium
EU340207.1.1436	B9960_uncultured Planctomycetales bacterium	1	0	0	-1.41503	#N/A	Peripheral	Bacteria	Planctomycetes	vadinHA49	uncultured Planctomycetales bacterium	uncultured Planctomycetales bacterium	uncultured Planctomycetales bacterium	uncultured Planctomycetales bacterium
EU734937.1.1565	B4425_Actinobacteria bacterium RBG_13_63_9	1	0	0	-0.976632	#N/A	Peripheral	Bacteria	Proteobacteria	Deltaproteobacteria	MBNT15	Actinobacteria bacterium RBG_13_63_9	Actinobacteria bacterium RBG_13_63_9	Actinobacteria bacterium RBG_13_63_9
f65f933bde2fe00fbfdf2148a6565072	B6750_uncultured bacterium	1	0	0	-0.986514	#N/A	Peripheral	Bacteria	Chloroflexi	NLS2-31	uncultured bacterium	uncultured bacterium	uncultured bacterium	uncultured bacterium
FJ152756.1.1420	B5540_SWB02	1	0	0	-0.986514	#N/A	Peripheral	Bacteria	Proteobacteria	Alphaproteobacteria	Caulobacterales	Hyphomonadaceae	SWB02	uncultured alpha proteobacterium
FJ230896.1.1508	B12563_Legionella	1	0	0	-0.997804	#N/A	Peripheral	Bacteria	Proteobacteria	Gammaproteobacteria	Legionellales	Legionellaceae	Legionella	#N/A
FJ810555.1.1478	B2434_f_Sporichthyaceae	1	0	0	-1.41503	#N/A	Peripheral	Bacteria	Actinobacteria	Actinobacteria	Frankiales	Sporichthyaceae	#N/A	#N/A
FPLP01002808.14.1540	B6142_uncultured Desulfuromonadales bacterium	1	0	0	-0.968168	#N/A	Peripheral	Bacteria	Proteobacteria	Deltaproteobacteria	PB19	uncultured Desulfuromonadales bacterium	uncultured Desulfuromonadales bacterium	uncultured Desulfuromonadales bacterium
FPLP01008492.1.1482	B4008_uncultured	1	0	0	-0.976632	#N/A	Peripheral	Bacteria	Chloroflexi	Anaerolineae	Caldilineales	Caldilineaceae	uncultured	#N/A
FPLS01031559.12.1515	B3642_f_Microscillaceae	1	0	0	-1.0365	#N/A	Peripheral	Bacteria	Bacteroidetes	Bacteroidia	Cytophagales	Microscillaceae	#N/A	#N/A
FPLS01044982.10.1479	B1663_f_Acetobacteraceae	1	0	0	-1.41503	#N/A	Peripheral	Bacteria	Proteobacteria	Alphaproteobacteria	Acetobacterales	Acetobacteraceae	#N/A	#N/A
GU454958.1.1481	B2484_uncultured bacterium	1	0	0	-1.41503	#N/A	Peripheral	Bacteria	WS4	uncultured bacterium	uncultured bacterium	uncultured bacterium	uncultured bacterium	uncultured bacterium
HM238163.1.1446	B10831_uncultured	1	0	0	-1.01606	#N/A	Peripheral	Bacteria	Planctomycetes	Planctomycetacia	Isosphaerales	Isosphaeraceae	uncultured	uncultured soil bacterium
HM243805.1.1524	B3002_Z114MB74	1	0	0	-1.41503	#N/A	Peripheral	Bacteria	Rokubacteria	NC10	Methylomirabilales	Methylomirabilaceae	Z114MB74	uncultured bacterium
HM262819.1.1355	B1058_uncultured Sphingobacteriales bacterium	1	0	0	-1.41503	#N/A	Peripheral	Bacteria	Bacteroidetes	Bacteroidia	Chitinophagales	37-13	uncultured Sphingobacteriales bacterium	uncultured Sphingobacteriales bacterium
HQ114142.1.1475	B12843_uncultured bacterium	1	0	0	-0.933184	#N/A	Peripheral	Bacteria	Verrucomicrobia	Verrucomicrobiae	Pedosphaerales	Pedosphaeraceae	uncultured bacterium	uncultured bacterium
HQ178712.1.1440	B2142_metagenome	1	0	0	-1.41503	#N/A	Peripheral	Bacteria	Bacteroidetes	Bacteroidia	Sphingobacteriales	NS11-12 marine group	metagenome	metagenome
JF176663.1.1380	B2565_Chthoniobacter	1	0	0	-1.41503	#N/A	Peripheral	Bacteria	Verrucomicrobia	Verrucomicrobiae	Chthoniobacterales	Chthoniobacteraceae	Chthoniobacter	uncultured bacterium
JF266202.1.1305	B15694_o_11-24	1	0	0	-0.968664	#N/A	Peripheral	Bacteria	Acidobacteria	Blastocatellia (Subgroup 4)	11-24	#N/A	#N/A	#N/A
JF411277.1.1435	B14384_Bacillus	1	0	0	-1.01606	#N/A	Peripheral	Bacteria	Firmicutes	Bacilli	Bacillales	Bacillaceae	Bacillus	#N/A
JF922313.1.1467	B13828_uncultured	1	0	0	-1.01606	#N/A	Peripheral	Bacteria	Bacteroidetes	Bacteroidia	Chitinophagales	Chitinophagaceae	uncultured	Chitinophaga sp. WW1(2011)
JN397710.1.1451	B4139_Candidatus Methylospira	1	0	0	-1.41503	#N/A	Peripheral	Bacteria	Proteobacteria	Gammaproteobacteria	Methylococcales	Methylococcaceae	Candidatus Methylospira	uncultured bacterium
JQ407903.1.1370	B10078_uncultured	1	0	0	-0.968664	#N/A	Peripheral	Bacteria	Planctomycetes	Planctomycetacia	Gemmatales	Gemmataceae	uncultured	#N/A
JX505346.1.1491	B8118_Desulfosporosinus	1	0	0	-1.01606	#N/A	Peripheral	Bacteria	Firmicutes	Clostridia	Clostridiales	Peptococcaceae	Desulfosporosinus	#N/A
KC620630.1.1506	B10847_Legionella	1	0	0	-0.976632	#N/A	Peripheral	Bacteria	Proteobacteria	Gammaproteobacteria	Legionellales	Legionellaceae	Legionella	Legionella sp. D4522
KC683035.1.1496	B424_uncultured	1	0	0	-1.41503	#N/A	Peripheral	Bacteria	Chloroflexi	Anaerolineae	Caldilineales	Caldilineaceae	uncultured	#N/A
KJ807905.1.1467	B12589_uncultured	1	0	0	-0.968168	#N/A	Peripheral	Bacteria	Chloroflexi	Anaerolineae	Caldilineales	Caldilineaceae	uncultured	uncultured bacterium
KM016313.1.1431	B5666_uncultured bacterium	1	0	0	-1.41503	#N/A	Peripheral	Bacteria	Armatimonadetes	Fimbriimonadia	Fimbriimonadales	Fimbriimonadaceae	uncultured bacterium	uncultured bacterium
KM019920.1.1461	B11558_Sphaerospermopsis BCCUSP55	1	0	0	-0.976632	#N/A	Peripheral	Bacteria	Cyanobacteria	Oxyphotobacteria	Nostocales	Nostocaceae	Sphaerospermopsis BCCUSP55	Wollea ambigua SAG 1403-7
KM205531.1.1496	B3863_uncultured soil bacterium	1	0	0	-1.0365	#N/A	Peripheral	Bacteria	Planctomycetes	Phycisphaerae	Pla1 lineage	uncultured soil bacterium	uncultured soil bacterium	uncultured soil bacterium
KX504934.1.1513	B1071_uncultured delta proteobacterium	1	0	0	-1.41503	#N/A	Peripheral	Bacteria	Zixibacteria	uncultured delta proteobacterium	uncultured delta proteobacterium	uncultured delta proteobacterium	uncultured delta proteobacterium	uncultured delta proteobacterium
MRTR01000030.83070.84633	B12318_Paenibacillus	1	0	0	-0.986514	#N/A	Peripheral	Bacteria	Firmicutes	Bacilli	Bacillales	Paenibacillaceae	Paenibacillus	#N/A
18882addac69d9cb32cb2738cf026151	F4006_o_NA	1	0	0	-0.986514	#N/A	Peripheral	Fungi	#N/A	#N/A	#N/A	#N/A	#N/A	#N/A
311428ee3e523d9e6308b524849a67e1	F3762_unidentified	1	0	0	-1.41503	#N/A	Peripheral	Fungi	unidentified	unidentified	unidentified	unidentified	unidentified	unidentified
41f841c6ed91133d27bfde0e0943ef5e	F947_o_NA	1	0	0	-1.41503	#N/A	Peripheral	Fungi	#N/A	#N/A	#N/A	#N/A	#N/A	#N/A
4f45e3ee41a1c5eb1c1c00f889aa373c	F2239_o_NA	1	0	0	-1.11477	#N/A	Peripheral	Fungi	#N/A	#N/A	#N/A	#N/A	#N/A	#N/A
5a4d69e6f3fdb7ab8f5b84f952b6fd14	F6040_o_NA	1	0	0	-0.976632	#N/A	Peripheral	Fungi	#N/A	#N/A	#N/A	#N/A	#N/A	#N/A
5b7c7a4b6f7ee671be7a6abf4d89f9c9	F1416_o_NA	1	0	0	-0.997804	#N/A	Peripheral	Fungi	Rozellomycota	#N/A	#N/A	#N/A	#N/A	#N/A
6c3fc98a61b803fc0917e24e20825712	F5671_unidentified	1	0	0	-1.41503	#N/A	Peripheral	Fungi	unidentified	unidentified	unidentified	unidentified	unidentified	unidentified
70c8a4bbb07f0b5bc3c172ca511b5325	F1674_o_NA	1	0	0	-0.997804	#N/A	Peripheral	Fungi	Basidiomycota	#N/A	#N/A	#N/A	#N/A	#N/A
8da1b88c3ed99d051698e06c3c07f1c3	F1437_unidentified	1	0	0	-0.997804	#N/A	Peripheral	Fungi	unidentified	unidentified	unidentified	unidentified	unidentified	unidentified
9117f92d4a76030e44d29a18a32f0498	F4612_unidentified	1	0	0	-1.0365	#N/A	Peripheral	Fungi	unidentified	unidentified	unidentified	unidentified	unidentified	unidentified
974d2d111dee4da363584b5d62ff311d	F8054_unidentified	1	0	0	-1.11477	#N/A	Peripheral	Fungi	unidentified	unidentified	unidentified	unidentified	unidentified	unidentified
ad6207e2d2ce27c17882cc6053f644ca	F3564_o_NA	1	0	0	-0.997804	#N/A	Peripheral	Fungi	#N/A	#N/A	#N/A	#N/A	#N/A	#N/A
ae347233d3bb988b119c0c8f8c589695	F1270_o_NA	1	0	0	-0.976632	#N/A	Peripheral	Fungi	#N/A	#N/A	#N/A	#N/A	#N/A	#N/A
d1d566eb3f30298ed8da5e557f9262ae	F655_o_NA	1	0	0	-0.968168	#N/A	Peripheral	Fungi	#N/A	#N/A	#N/A	#N/A	#N/A	#N/A
daea992937d6fd108ff4b6b675e6003f	F8275_unidentified	1	0	0	-1.01606	#N/A	Peripheral	Fungi	unidentified	unidentified	unidentified	unidentified	unidentified	unidentified
f5ac3715926cce7bfa3e021fdb589e4c	F1122_unidentified	1	0	0	-0.997804	#N/A	Peripheral	Fungi	unidentified	unidentified	unidentified	unidentified	unidentified	unidentified
fe3f97007bfd9c5753566218afd92367	F2727_o_NA	1	0	0	-0.933184	#N/A	Peripheral	Fungi	#N/A	#N/A	#N/A	#N/A	#N/A	#N/A
SH093147.07FU_JX256420_refs	F314_Curvularia	1	0	0	-0.933184	#N/A	Peripheral	Fungi	Ascomycota	Dothideomycetes	Pleosporales	Pleosporaceae	Curvularia	#N/A
SH180705.07FU_FJ372389_reps	F1466_unidentified	1	0	0	-0.976632	#N/A	Peripheral	Fungi	Ascomycota	Dothideomycetes	Pleosporales	Lophiostomataceae	unidentified	unidentified
SH183635.07FU_DQ420856_reps	F97_Mortierella	1	0	0	-0.976632	#N/A	Peripheral	Fungi	Mortierellomycota	Mortierellomycetes	Mortierellales	Mortierellaceae	Mortierella	Mortierella_alpina
SH205939.07FU_AY364836_refs	F717_Symmetrospora	1	0	0	-0.968168	#N/A	Peripheral	Fungi	Basidiomycota	Cystobasidiomycetes	Cystobasidiomycetes_ord_Incertae_sedis	Symmetrosporaceae	Symmetrospora	Symmetrospora_vermiculata
SH210945.07FU_JX330867_reps	F823_Sagenomella	1	0	0	-1.11477	#N/A	Peripheral	Fungi	Ascomycota	Eurotiomycetes	Eurotiales	Trichocomaceae	Sagenomella	Sagenomella_oligospora
SH222544.07FU_AF478577_refs	F7549_Cortinarius	1	0	0	-0.968168	#N/A	Peripheral	Fungi	Basidiomycota	Agaricomycetes	Agaricales	Cortinariaceae	Cortinarius	#N/A
SH469490.07FU_AY997055_refs_sinGleTon	F7555_unidentified	1	0	0	-0.968168	#N/A	Peripheral	Fungi	unidentified	unidentified	unidentified	unidentified	unidentified	unidentified
AY963505.1.1447	B213_f_SC-I-84	165	0.016342	0.289734	0.937089	Oligo	Peripheral	Bacteria	Proteobacteria	Gammaproteobacteria	Betaproteobacteriales	SC-I-84	#N/A	#N/A
1a44652dca83c1222aadd7926be76246	F508_o_NA	157	0.00590198	0.366911	2.34353	Oligo	Peripheral	Fungi	#N/A	#N/A	#N/A	#N/A	#N/A	#N/A
96a586bd4c5cc189bf66c9501a456bdb	F328_unidentified	157	0.0125006	0.426792	2.28116	Oligo	Peripheral	Fungi	unidentified	unidentified	unidentified	unidentified	unidentified	unidentified
6261e46784fd87301e993d188e6d3e2d	F393_unidentified	143	0.0117143	0.402954	1.86114	Oligo	Peripheral	Fungi	Basidiomycota	Microbotryomycetes	Leucosporidiales	unidentified	unidentified	unidentified
GU135492.1.1364	A18_o_NA	139	0.00724189	0.193986	2.42056	Oligo	Peripheral	Archaea	Crenarchaeota	Bathyarchaeia	#N/A	#N/A	#N/A	#N/A
505857b1e1892a7203f769f2bef3abdd	F350_unidentified	136	0.0139617	0.343858	1.89434	Oligo	Peripheral	Fungi	unidentified	unidentified	unidentified	unidentified	unidentified	unidentified
HE796088.1.905	A61_Methanosaeta	135	0.00521261	0.187325	2.33624	Oligo	Peripheral	Archaea	Euryarchaeota	Methanomicrobia	Methanosarcinales	Methanosaetaceae	Methanosaeta	#N/A
AB243793.1.1341	A72_uncultured crenarchaeote	121	0.00213729	0.165289	2.02708	Oligo	Peripheral	Archaea	Thaumarchaeota	Group 1.1c	uncultured crenarchaeote	uncultured crenarchaeote	uncultured crenarchaeote	uncultured crenarchaeote
0a068bd8eef1ca84530b737bde9ea177	F1116_o_Agaricales	118	0.00995449	0.209135	1.85844	Oligo	Peripheral	Fungi	Basidiomycota	Agaricomycetes	Agaricales	#N/A	#N/A	#N/A
KP266474.1.990	A259_uncultured bacterium	115	0.00125455	0.0989036	1.98032	Oligo	Peripheral	Archaea	Euryarchaeota	Thermoplasmata	Methanomassiliicoccales	uncultured	uncultured bacterium	uncultured bacterium
e33401524c8916926d7fd9c9cbd1f0fb	B292_f_BSV26	108	0.0106071	0.289952	2.20402	Oligo	Peripheral	Bacteria	Bacteroidetes	Ignavibacteria	Kryptoniales	BSV26	#N/A	#N/A
2d665a9a0b55948615079fba14e82ad7	A31_Methanosaeta	105	0.00431479	0.073288	2.32077	Oligo	Peripheral	Archaea	Euryarchaeota	Methanomicrobia	Methanosarcinales	Methanosaetaceae	Methanosaeta	Methanosaeta sp. ARCH
JF134673.1.1333	B135_Nakamurella	98	0.000368418	0.21491	1.40398	Oligo	Peripheral	Bacteria	Actinobacteria	Actinobacteria	Frankiales	Nakamurellaceae	Nakamurella	Nakamurella sp.
KP987251.1.1361	A125_Methanosaeta	92	0.00496377	0.0831758	2.39211	Oligo	Peripheral	Archaea	Euryarchaeota	Methanomicrobia	Methanosarcinales	Methanosaetaceae	Methanosaeta	#N/A
ATTS01000027.891.2404	B1135_Ellin6067	89	0.00554773	0.146446	2.20371	Oligo	Peripheral	Bacteria	Proteobacteria	Gammaproteobacteria	Betaproteobacteriales	Nitrosomonadaceae	Ellin6067	#N/A
KP762234.1.1263	B42_f_Micrococcaceae	89	0.014224	0.360561	1.65232	Oligo	Peripheral	Bacteria	Actinobacteria	Actinobacteria	Micrococcales	Micrococcaceae	#N/A	#N/A
DQ837235.1.1375	B721_Pseudolabrys	87	0.00364891	0.128419	2.16433	Oligo	Peripheral	Bacteria	Proteobacteria	Alphaproteobacteria	Rhizobiales	Xanthobacteraceae	Pseudolabrys	#N/A
27a75582f396f38dc01564c0fdbd3142	F503_Scedosporium	87	0.00652674	0.470868	1.27311	Oligo	Peripheral	Fungi	Ascomycota	Sordariomycetes	Microascales	Microascaceae	Scedosporium	Scedosporium_dehoogii
JF833589.1.1472	B1518_ADurb.Bin063-1	86	0.00211469	0.14954	1.84348	Oligo	Peripheral	Bacteria	Verrucomicrobia	Verrucomicrobiae	Pedosphaerales	Pedosphaeraceae	ADurb.Bin063-1	uncultured Verrucomicrobia subdivision 3 bacterium
EF464632.1.1356	B322_o_SJA-15	84	0.000304177	0.152778	1.09957	Oligo	Peripheral	Bacteria	Chloroflexi	Anaerolineae	SJA-15	#N/A	#N/A	#N/A
JN626534.1.1374	B1677_Geobacter	84	0.000357696	0.0464853	1.20655	Oligo	Peripheral	Bacteria	Proteobacteria	Deltaproteobacteria	Desulfuromonadales	Geobacteraceae	Geobacter	#N/A
KJ878612.1.1217	B1592_f_Burkholderiaceae	82	0.000240635	0.0928019	1.09191	Oligo	Peripheral	Bacteria	Proteobacteria	Gammaproteobacteria	Betaproteobacteriales	Burkholderiaceae	#N/A	#N/A
AB487770.1.1360	B1232_f_Burkholderiaceae	81	6.97927e-05	0.197531	1.00539	Oligo	Peripheral	Bacteria	Proteobacteria	Gammaproteobacteria	Betaproteobacteriales	Burkholderiaceae	#N/A	#N/A
HQ844554.1.1431	B133_uncultured Chloroflexi bacterium	80	0.00141269	0.0721875	1.50563	Oligo	Peripheral	Bacteria	Chloroflexi	KD4-96	uncultured Chloroflexi bacterium	uncultured Chloroflexi bacterium	uncultured Chloroflexi bacterium	uncultured Chloroflexi bacterium
GQ214115.1.1475	B167_o_NA	79	0.000543337	0.0730652	1.73532	Oligo	Peripheral	Bacteria	Acidobacteria	Subgroup 6	#N/A	#N/A	#N/A	#N/A
JX079225.1.1547	B259_Anaeromyxobacter	77	6.41414e-05	0.0505988	1.00594	Oligo	Peripheral	Bacteria	Proteobacteria	Deltaproteobacteria	Myxococcales	Archangiaceae	Anaeromyxobacter	uncultured Anaeromyxobacter sp.
DQ404805.1.1465	B965_Candidatus Solibacter	76	0.000268593	0.099723	0.919964	Oligo	Peripheral	Bacteria	Acidobacteria	Acidobacteriia	Solibacterales	Solibacteraceae (Subgroup 3)	Candidatus Solibacter	uncultured soil bacterium
AY133073.1.1450	B2607_Azoarcus	75	0.000214934	0.0519111	0.948622	Oligo	Peripheral	Bacteria	Proteobacteria	Gammaproteobacteria	Betaproteobacteriales	Rhodocyclaceae	Azoarcus	#N/A
ceade32162e04d77293b48b63d77bcf7	F649_unidentified	75	0.000690484	0.100978	1.55506	Oligo	Peripheral	Fungi	unidentified	unidentified	unidentified	unidentified	unidentified	unidentified
JF265777.1.1358	B110_Ellin6067	71	0.00105623	0.0809363	1.4469	Oligo	Peripheral	Bacteria	Proteobacteria	Gammaproteobacteria	Betaproteobacteriales	Nitrosomonadaceae	Ellin6067	#N/A
KC442629.1.1355	B568_o_Gaiellales	71	2.93293e-05	0.106328	0.818508	Oligo	Peripheral	Bacteria	Actinobacteria	Thermoleophilia	Gaiellales	#N/A	#N/A	#N/A
818b553c207785a8c52c4cd619fe912f	B1403_Anaeromyxobacter	70	7.93664e-05	0.244898	0.663732	Oligo	Peripheral	Bacteria	Proteobacteria	Deltaproteobacteria	Myxococcales	Archangiaceae	Anaeromyxobacter	#N/A
f240aa76c78e0f2c96ade40f5cbe5401	F781_unidentified	70	0.000453314	0.0555102	1.4469	Oligo	Peripheral	Fungi	Glomeromycota	Archaeosporomycetes	Archaeosporales	Archaeosporaceae	unidentified	unidentified
HM445368.1.1370	B551_Gaiella	69	0.000406333	0.0285654	1.38766	Oligo	Peripheral	Bacteria	Actinobacteria	Thermoleophilia	Gaiellales	Gaiellaceae	Gaiella	#N/A
AY921965.1.1355	B984_uncultured Chloroflexi bacterium	68	5.93438e-05	0	1.23542	Oligo	Peripheral	Bacteria	Chloroflexi	KD4-96	uncultured Chloroflexi bacterium	uncultured Chloroflexi bacterium	uncultured Chloroflexi bacterium	uncultured Chloroflexi bacterium
EU133195.1.1383	B1240_f_uncultured	68	0.000633356	0.0570934	1.57355	Oligo	Peripheral	Bacteria	Actinobacteria	Thermoleophilia	Gaiellales	uncultured	#N/A	#N/A
AY922044.1.1353	B31_metagenome	67	0.000698225	0.0579194	1.53416	Oligo	Peripheral	Bacteria	Chloroflexi	KD4-96	metagenome	metagenome	metagenome	metagenome
HQ118841.1.1290	B352_Massilia	67	0.000607081	0.0579194	1.53416	Oligo	Peripheral	Bacteria	Proteobacteria	Gammaproteobacteria	Betaproteobacteriales	Burkholderiaceae	Massilia	#N/A
HM445030.1.1320	B2714_o_SBR1031	66	1.47884e-05	0.189624	0.635261	Oligo	Peripheral	Bacteria	Chloroflexi	Anaerolineae	SBR1031	#N/A	#N/A	#N/A
AY395375.1.1446	B2746_Gaiella	64	4.78114e-05	0.169922	0.60679	Oligo	Peripheral	Bacteria	Actinobacteria	Thermoleophilia	Gaiellales	Gaiellaceae	Gaiella	uncultured Rubrobacteria bacterium
ec0644ec2c082ba8de4fd6d7f5079c6b	B1390_o_NA	64	2.26682e-05	0.21875	0.549848	Oligo	Peripheral	Bacteria	Latescibacteria	#N/A	#N/A	#N/A	#N/A	#N/A
JN398041.1.1399	A73_uncultured	62	2.10732e-05	0.200312	0.521377	Oligo	Peripheral	Archaea	Euryarchaeota	Thermoplasmata	Methanomassiliicoccales	Methanomassiliicoccaceae	uncultured	#N/A
GQ396836.1.1487	B950_f_Blastocatellaceae	62	7.5344e-06	0.062435	0.621765	Oligo	Peripheral	Bacteria	Acidobacteria	Blastocatellia (Subgroup 4)	Blastocatellales	Blastocatellaceae	#N/A	#N/A
AB672107.1.1459	B801_MND1	61	4.1932e-05	0.0322494	0.576066	Oligo	Peripheral	Bacteria	Proteobacteria	Gammaproteobacteria	Betaproteobacteriales	Nitrosomonadaceae	MND1	uncultured Rhodocyclaceae bacterium
be7bb628fb9a5e413ed0dd9bd99398e8	F309_o_NA	61	0.000458325	0.0634238	1.29785	Oligo	Peripheral	Fungi	Basidiomycota	Agaricomycetes	#N/A	#N/A	#N/A	#N/A
dbef1a0670e1f8024e5a6e70960fb674	A143_uncultured euryarchaeote	60	5.80692e-05	0	0.972306	Oligo	Peripheral	Archaea	Nanoarchaeaeota	Woesearchaeia	uncultured euryarchaeote	uncultured euryarchaeote	uncultured euryarchaeote	uncultured euryarchaeote
DQ137946.1.1220	B125_uncultured	59	6.49513e-05	0.182706	0.464435	Oligo	Peripheral	Bacteria	Chloroflexi	Anaerolineae	Anaerolineales	Anaerolineaceae	uncultured	#N/A
KF481597.1.1496	B458_uncultured Aminicenantes bacterium	59	0.00128079	0.303361	0.232168	Oligo	Peripheral	Bacteria	Acidobacteria	Aminicenantia	Aminicenantales	uncultured Aminicenantes bacterium	uncultured Aminicenantes bacterium	uncultured Aminicenantes bacterium
KC554898.1.1512	B451_f_uncultured	58	5.40031e-05	0.212247	0.407492	Oligo	Peripheral	Bacteria	Actinobacteria	Thermoleophilia	Gaiellales	uncultured	#N/A	#N/A
MELV01000092.30793.32327	B180_Actinobacteria bacterium RBG_19FT_COMBO_70_19	58	0.00404154	0.508918	1.69313	Oligo	Peripheral	Bacteria	Actinobacteria	MB-A2-108	Actinobacteria bacterium RBG_19FT_COMBO_70_19	Actinobacteria bacterium RBG_19FT_COMBO_70_19	Actinobacteria bacterium RBG_19FT_COMBO_70_19	Actinobacteria bacterium RBG_19FT_COMBO_70_19
f04abaa7aa665f64e25f05f5c5d2044f	A499_o_NA	57	0.00223232	0.444444	0.0970448	Oligo	Peripheral	Archaea	Nanoarchaeaeota	Woesearchaeia	#N/A	#N/A	#N/A	#N/A
AB630472.1.1501	B2377_Desulfobacca	57	4.77033e-05	0.0344721	0.461433	Oligo	Peripheral	Bacteria	Proteobacteria	Deltaproteobacteria	Syntrophobacterales	Syntrophaceae	Desulfobacca	#N/A
JX840394.1.1463	B262_Pseudomonas	56	0.00867895	0.30676	2.36516	Oligo	Peripheral	Bacteria	Proteobacteria	Gammaproteobacteria	Pseudomonadales	Pseudomonadaceae	Pseudomonas	#N/A
02dabc3d062a89bbcc7a10e90456662d	B1221_wastewater metagenome	55	7.41597e-05	0.0357025	0.767567	Oligo	Peripheral	Bacteria	Chloroflexi	Anaerolineae	SBR1031	A4b	wastewater metagenome	wastewater metagenome
FPLS01010349.15.1481	B345_Haliangium	55	0.000126764	0	0.799656	Oligo	Peripheral	Bacteria	Proteobacteria	Deltaproteobacteria	Myxococcales	Haliangiaceae	Haliangium	uncultured prokaryote
39043ccd2b5f8089b92588ca756481ae	F625_unidentified	55	0.000112737	0	0.807859	Oligo	Peripheral	Fungi	Rozellomycota	unidentified	unidentified	unidentified	unidentified	unidentified
SH187498.07FU_AJ888440_refs	F683_Scedosporium	55	0.00291954	0.335868	2.19715	Oligo	Peripheral	Fungi	Ascomycota	Sordariomycetes	Microascales	Microascaceae	Scedosporium	Scedosporium_aurantiacum
DQ058674.1.1514	B118_Nitrospira	53	0.00825506	0.405838	1.77713	Oligo	Peripheral	Bacteria	Nitrospirae	Nitrospira	Nitrospirales	Nitrospiraceae	Nitrospira	#N/A
KT342857.7981.9515	B595_uncultured bacterium 5G12	53	1.01176e-05	0	0.735477	Oligo	Peripheral	Bacteria	Actinobacteria	Thermoleophilia	Gaiellales	uncultured	uncultured bacterium 5G12	uncultured bacterium 5G12
LN565328.1.1373	B2668_Dokdonella	52	2.64079e-06	0.0739645	0.340702	Oligo	Peripheral	Bacteria	Proteobacteria	Gammaproteobacteria	Xanthomonadales	Rhodanobacteraceae	Dokdonella	Dokdonella ginsengisoli
SH218122.07FU_HQ446078_reps	F9_o_NA	52	0.00539537	0.204142	2.36516	Oligo	Peripheral	Fungi	Ascomycota	Leotiomycetes	#N/A	#N/A	#N/A	#N/A
SH640256.07FU_KY102493_reps	F73_Cyberlindnera	52	0.00565809	0.286243	2.11315	Oligo	Peripheral	Fungi	Ascomycota	Saccharomycetes	Saccharomycetales	Phaffomycetaceae	Cyberlindnera	unidentified
AB630641.1.1430	B1095_Candidatus Solibacter	51	0.000363313	0.0384468	0.643412	Oligo	Peripheral	Bacteria	Acidobacteria	Acidobacteriia	Solibacterales	Solibacteraceae (Subgroup 3)	Candidatus Solibacter	#N/A
EU202742.1.1421	B781_o_Acidobacteriales	51	3.58409e-05	0	0.833995	Oligo	Peripheral	Bacteria	Acidobacteria	Acidobacteriia	Acidobacteriales	#N/A	#N/A	#N/A
f0310ebb9fb53d3605c8ecde9c70cdd9	B78_f_Anaerolineaceae	51	0.0125466	0.410611	1.69313	Oligo	Peripheral	Bacteria	Chloroflexi	Anaerolineae	Anaerolineales	Anaerolineaceae	#N/A	#N/A
f8a69675ac0cb0685e58e3db0fbca647	F128_o_NA	51	0.00532055	0.236832	2.19715	Oligo	Peripheral	Fungi	#N/A	#N/A	#N/A	#N/A	#N/A	#N/A
JN417554.1.1538	B2317_Gaiella	50	4.21557e-05	0	0.752479	Oligo	Peripheral	Bacteria	Actinobacteria	Thermoleophilia	Gaiellales	Gaiellaceae	Gaiella	uncultured soil bacterium
a4a4257578a7c672af1b5844bac8afad	F477_unidentified	50	0.00256642	0.18	2.28116	Oligo	Peripheral	Fungi	unidentified	unidentified	unidentified	unidentified	unidentified	unidentified
a4a477c80f1a731e967fc20e68e61353	F1109_unidentified	50	0.00439389	0.3928	1.69313	Oligo	Peripheral	Fungi	Chytridiomycota	unidentified	unidentified	unidentified	unidentified	unidentified
AB240223.1.1459	B1101_uncultured	49	8.08434e-06	0.183257	0.208195	Oligo	Peripheral	Bacteria	Chloroflexi	Anaerolineae	Anaerolineales	Anaerolineaceae	uncultured	uncultured Anaerolineaceae bacterium
EU134197.1.1315	B60_uncultured bacterium	49	0.00235377	0.324865	0.281629	Oligo	Peripheral	Bacteria	Chloroflexi	KD4-96	uncultured bacterium	uncultured bacterium	uncultured bacterium	uncultured bacterium
FJ391498.1.1433	B193_Sideroxydans	49	2.84237e-05	0.0399833	0.232168	Oligo	Peripheral	Bacteria	Proteobacteria	Gammaproteobacteria	Betaproteobacteriales	Gallionellaceae	Sideroxydans	Gallionella sp. enrichment culture clone MWE_N26
JN038737.1.1519	B480_Desulfobacca	49	3.90203e-06	0.0399833	0.28449	Oligo	Peripheral	Bacteria	Proteobacteria	Deltaproteobacteria	Syntrophobacterales	Syntrophaceae	Desulfobacca	uncultured bacterium
LC124570.1.1467	B1210_f_SC-I-84	49	2.7853e-05	0.0399833	0.864606	Oligo	Peripheral	Bacteria	Proteobacteria	Gammaproteobacteria	Betaproteobacteriales	SC-I-84	#N/A	#N/A
SH190017.07FU_AF444350_refs	F3_Solicoccozyma	49	0.00304527	0.441483	1.44112	Oligo	Peripheral	Fungi	Basidiomycota	Tremellomycetes	Filobasidiales	Piskurozymaceae	Solicoccozyma	Solicoccozyma_terricola
EU133348.1.1319	B2019_Novosphingobium	48	2.1606e-05	0	0.725835	Oligo	Peripheral	Bacteria	Proteobacteria	Alphaproteobacteria	Sphingomonadales	Sphingomonadaceae	Novosphingobium	uncultured prokaryote
FJ936854.1.1519	B28_Desulfobacca	48	0.00822978	0.225694	2.02915	Oligo	Peripheral	Bacteria	Proteobacteria	Deltaproteobacteria	Syntrophobacterales	Syntrophaceae	Desulfobacca	uncultured bacterium
HM445168.1.1361	B1483_MND1	48	0.000127823	0.0407986	0.542939	Oligo	Peripheral	Bacteria	Proteobacteria	Gammaproteobacteria	Betaproteobacteriales	Nitrosomonadaceae	MND1	uncultured Rhodocyclaceae bacterium
JX222840.1.1516	B1609_Geobacter	48	2.30506e-05	0	0.725835	Oligo	Peripheral	Bacteria	Proteobacteria	Deltaproteobacteria	Desulfuromonadales	Geobacteraceae	Geobacter	#N/A
c152aa236177df11b68e9500631baf19	F402_o_NA	48	0.00259096	0.486111	1.1891	Oligo	Peripheral	Fungi	#N/A	#N/A	#N/A	#N/A	#N/A	#N/A
d6b842f44d67bb5986fb4cbabd19c046	F163_o_NA	48	0.00337874	0.304688	1.77713	Oligo	Peripheral	Fungi	#N/A	#N/A	#N/A	#N/A	#N/A	#N/A
SH204312.07FU_HG935220_reps	F29_Tetracladium	48	0.00595701	0.0407986	2.44917	Oligo	Peripheral	Fungi	Ascomycota	Leotiomycetes	Helotiales	Helotiaceae	Tetracladium	#N/A
AY921831.1.1380	B340_o_Microtrichales	47	1.32521e-05	0	0.203509	Oligo	Peripheral	Bacteria	Actinobacteria	Acidimicrobiia	Microtrichales	#N/A	#N/A	#N/A
EF600577.1.1340	B237_Candidatus Udaeobacter	47	1.42045e-05	0.0416478	0.785835	Oligo	Peripheral	Bacteria	Verrucomicrobia	Verrucomicrobiae	Chthoniobacterales	Chthoniobacteraceae	Candidatus Udaeobacter	#N/A
JF718679.1.1495	B1191_Terrimonas	47	0.000131271	0.0416478	0.653729	Oligo	Peripheral	Bacteria	Bacteroidetes	Bacteroidia	Chitinophagales	Chitinophagaceae	Terrimonas	#N/A
0ae5fc192c09e7794b4c3ebd4cccede6	F227_o_NA	47	0.00578115	0.383884	1.52512	Oligo	Peripheral	Fungi	#N/A	#N/A	#N/A	#N/A	#N/A	#N/A
98c2895ba3e798def25c5d48aae220a1	F148_unidentified	47	0.00574554	0.296062	1.77713	Oligo	Peripheral	Fungi	Ascomycota	Sordariomycetes	Hypocreales	Stachybotryaceae	unidentified	unidentified
SH523464.07FU_KP335652_reps	F105_Zopfiella	47	0.00988224	0.160254	2.11315	Oligo	Peripheral	Fungi	Ascomycota	Sordariomycetes	Sordariales	Chaetomiaceae	Zopfiella	Zopfiella_marina
196a0e57f2a933f1ccaee5286522f858	A177_o_NA	46	0.00290266	0.363894	1.44112	Oligo	Peripheral	Archaea	Nanoarchaeaeota	Woesearchaeia	#N/A	#N/A	#N/A	#N/A
JN397739.1.1458	B11_f_SC-I-84	46	0.0105809	0	2.36516	Oligo	Peripheral	Bacteria	Proteobacteria	Gammaproteobacteria	Betaproteobacteriales	SC-I-84	#N/A	#N/A
FJ849549.1.1478	B1598_Geobacter	45	3.16152e-05	0.0434568	0.707064	Oligo	Peripheral	Bacteria	Proteobacteria	Deltaproteobacteria	Desulfuromonadales	Geobacteraceae	Geobacter	#N/A
FPLS01008969.8.1534	B811_Phaeodactylibacter	45	4.01269e-06	0	0.47876	Oligo	Peripheral	Bacteria	Bacteroidetes	Bacteroidia	Chitinophagales	Saprospiraceae	Phaeodactylibacter	uncultured Haliscomenobacter sp.
KC245145.1.1378	B1547_Flavobacterium	45	1.67238e-05	0	0.478965	Oligo	Peripheral	Bacteria	Bacteroidetes	Bacteroidia	Flavobacteriales	Flavobacteriaceae	Flavobacterium	#N/A
KM267482.1.1491	B383_Massilia	45	0.00432763	0	2.28116	Oligo	Peripheral	Bacteria	Proteobacteria	Gammaproteobacteria	Betaproteobacteriales	Burkholderiaceae	Massilia	#N/A
AB806459.1.1413	B67_uncultured	44	0.003416	0.0444215	2.11315	Oligo	Peripheral	Bacteria	Proteobacteria	Alphaproteobacteria	Rhizobiales	Methyloligellaceae	uncultured	#N/A
JQ627403.1.1333	B278_f_Burkholderiaceae	44	0.00505491	0.0444215	2.11315	Oligo	Peripheral	Bacteria	Proteobacteria	Gammaproteobacteria	Betaproteobacteriales	Burkholderiaceae	#N/A	#N/A
SH217330.07FU_AB540572_refs	F52_Acremonium	44	0.00290894	0.235537	1.69313	Oligo	Peripheral	Fungi	Ascomycota	Sordariomycetes	Hypocreales	Hypocreales_fam_Incertae_sedis	Acremonium	Acremonium_dichromosporum
HQ330726.1.919	A10_Methanosaeta	43	0.00981284	0.04543	2.02915	Oligo	Peripheral	Archaea	Euryarchaeota	Methanomicrobia	Methanosarcinales	Methanosaetaceae	Methanosaeta	#N/A
JQ245962.1.931	A613_uncultured archaeon	43	1.49277e-05	0	0.0888766	Oligo	Peripheral	Archaea	Hadesarchaeaeota	uncultured archaeon	uncultured archaeon	uncultured archaeon	uncultured archaeon	uncultured archaeon
FN691714.1.913	A14_Candidatus Nitrosotalea	42	0.00542165	0.132653	1.77713	Oligo	Peripheral	Archaea	Thaumarchaeota	Nitrososphaeria	Nitrosotaleales	Nitrosotaleaceae	Candidatus Nitrosotalea	uncultured crenarchaeote
AM697057.1.1431	B216_uncultured	42	0.0085622	0.291383	1.44112	Oligo	Peripheral	Bacteria	Chloroflexi	Chloroflexia	Chloroflexales	Roseiflexaceae	uncultured	uncultured Chloroflexaceae bacterium
EF018313.1.1387	B143_Rhodanobacter	42	0.00284849	0.0907029	1.86114	Oligo	Peripheral	Bacteria	Proteobacteria	Gammaproteobacteria	Xanthomonadales	Rhodanobacteraceae	Rhodanobacter	uncultured Dokdonella sp.
EF018757.1.1384	B219_uncultured Desulfuromonadales bacterium	42	9.46945e-05	0.0464853	0.560778	Oligo	Peripheral	Bacteria	Acidobacteria	Holophagae	Subgroup 7	uncultured Desulfuromonadales bacterium	uncultured Desulfuromonadales bacterium	uncultured Desulfuromonadales bacterium
c88d548febb0f8a7c12cb9fdb722fcb2	F1155_o_NA	42	0.00229501	0.0464853	1.94514	Oligo	Peripheral	Fungi	#N/A	#N/A	#N/A	#N/A	#N/A	#N/A
SH203375.07FU_FN706542_refs	F1033_Acremonium	42	0.00372556	0.471655	0.685076	Oligo	Peripheral	Fungi	Ascomycota	Sordariomycetes	Hypocreales	Hypocreales_fam_Incertae_sedis	Acremonium	Acremonium_fusidioides
6d62f604546d77bb3727e8265220e6a7	B2060_o_NA	41	1.29626e-05	0.0475907	0.00290209	Oligo	Peripheral	Bacteria	Actinobacteria	MB-A2-108	#N/A	#N/A	#N/A	#N/A
AM936916.1.1373	B3064_Subgroup 10	41	0.00013649	0.0928019	0.286222	Oligo	Peripheral	Bacteria	Acidobacteria	Thermoanaerobaculia	Thermoanaerobaculales	Thermoanaerobaculaceae	Subgroup 10	uncultured alpha proteobacterium
FJ484997.1.1374	B828_uncultured	41	3.34182e-06	0	0.560778	Oligo	Peripheral	Bacteria	Proteobacteria	Deltaproteobacteria	Syntrophobacterales	Syntrophaceae	uncultured	uncultured delta proteobacterium
aef8a1f965bd5aaad2674f159c9c01c2	F1242_o_NA	41	0.00149534	0.0928019	1.77713	Oligo	Peripheral	Fungi	#N/A	#N/A	#N/A	#N/A	#N/A	#N/A
eb141416409200d61587ae2c33655086	F1389_o_NA	41	1.82214e-06	0.0928019	0.0315338	Oligo	Peripheral	Fungi	#N/A	#N/A	#N/A	#N/A	#N/A	#N/A
f097f4b0e6ad214922c8876e5d0df4c3	F1139_Pseudaleuria	41	0.00407283	0	1.94514	Oligo	Peripheral	Fungi	Ascomycota	Pezizomycetes	Pezizales	Pyronemataceae	Pseudaleuria	Pseudaleuria_quinaultiana
SH293412.07FU_AY129289_refs	F111_Pseudeurotium	41	0.0181905	0.611541	0.0970448	Oligo	Peripheral	Fungi	Ascomycota	Leotiomycetes	Thelebolales	Pseudeurotiaceae	Pseudeurotium	unidentified
FJ907179.1.1347	A13_Candidatus Methanoperedens	40	0.0146504	0.36625	1.1051	Oligo	Peripheral	Archaea	Euryarchaeota	Methanomicrobia	Methanosarcinales	Methanoperedenaceae	Candidatus Methanoperedens	archaeon enrichment culture clone LCB_A1C7
AB426221.1.1401	B799_o_NA	40	0.00194996	0.04875	1.77713	Oligo	Peripheral	Bacteria	Acidobacteria	Subgroup 18	#N/A	#N/A	#N/A	#N/A
EF019269.1.1348	B502_Bryobacter	40	2.48632e-05	0.04875	0.510136	Oligo	Peripheral	Bacteria	Acidobacteria	Acidobacteriia	Solibacterales	Solibacteraceae (Subgroup 3)	Bryobacter	#N/A
GQ388798.1.1499	B495_o_Betaproteobacteriales	40	4.42978e-06	0	0.314518	Oligo	Peripheral	Bacteria	Proteobacteria	Gammaproteobacteria	Betaproteobacteriales	#N/A	#N/A	#N/A
SH212824.07FU_AF444417_refs	F1_Guehomyces	40	0.0021765	0.455	0.685076	Oligo	Peripheral	Fungi	Basidiomycota	Tremellomycetes	Cystofilobasidiales	Cystofilobasidiaceae	Guehomyces	Guehomyces_pullulans
EU519253.1.1054	A4_Methanosaeta	39	0.00473284	0.0499671	1.69313	Oligo	Peripheral	Archaea	Euryarchaeota	Methanomicrobia	Methanosarcinales	Methanosaetaceae	Methanosaeta	uncultured archaeon
FJ957949.1.906	A24_uncultured methanogenic archaeon	39	0.00480177	0.0499671	1.69313	Oligo	Peripheral	Archaea	Crenarchaeota	Bathyarchaeia	uncultured methanogenic archaeon	uncultured methanogenic archaeon	uncultured methanogenic archaeon	uncultured methanogenic archaeon
aeec70b15ec9cd5c0481aedf86e4984b	B1912_o_OPB41	39	5.05275e-06	0	0.482849	Oligo	Peripheral	Bacteria	Actinobacteria	Coriobacteriia	OPB41	#N/A	#N/A	#N/A
AM691112.1.1456	B112_Massilia	39	0.00598711	0.0499671	1.69313	Oligo	Peripheral	Bacteria	Proteobacteria	Gammaproteobacteria	Betaproteobacteriales	Burkholderiaceae	Massilia	#N/A
EU133783.1.1353	B1323_f_SC-I-84	39	9.18746e-05	0	-0.0257561	Oligo	Peripheral	Bacteria	Proteobacteria	Gammaproteobacteria	Betaproteobacteriales	SC-I-84	#N/A	#N/A
2de3ed6963fba102ef57b854b51982f1	F2344_unidentified	39	0.000426742	0.0973044	0.222043	Oligo	Peripheral	Fungi	Ascomycota	Dothideomycetes	Capnodiales	unidentified	unidentified	unidentified
SH202458.07FU_AF144483_refs	F10_Mrakia	39	0.00873017	0.326101	1.1051	Oligo	Peripheral	Fungi	Basidiomycota	Tremellomycetes	Cystofilobasidiales	Mrakiaceae	Mrakia	Mrakia_frigida
SH216870.07FU_GU934595_reps	F377_Neobulgaria	39	0.00193495	0	1.77713	Oligo	Peripheral	Fungi	Ascomycota	Leotiomycetes	Helotiales	Leotiaceae	Neobulgaria	unidentified
aaeca2b7bfc713fdf91baef469faf1fd	B161_o_NA	38	0.00173527	0	1.69313	Oligo	Peripheral	Bacteria	Acidobacteria	Subgroup 6	#N/A	#N/A	#N/A	#N/A
AB672136.1.1423	B47_f_uncultured	38	0.015521	0.353186	1.02109	Oligo	Peripheral	Bacteria	Acidobacteria	Acidobacteriia	Acidobacteriales	uncultured	#N/A	#N/A
AM411905.1.1378	B168_Sphingomonas	38	0.00549203	0.342105	1.02109	Oligo	Peripheral	Bacteria	Proteobacteria	Alphaproteobacteria	Sphingomonadales	Sphingomonadaceae	Sphingomonas	Sphingomonas sp. P-54
fa73f3b8d2b15a03285d38a53d4580ab	B904_uncultured	38	0.00216909	0	1.69313	Oligo	Peripheral	Bacteria	Chloroflexi	Anaerolineae	Anaerolineales	Anaerolineaceae	uncultured	uncultured Chloroflexi bacterium
0038cacd0d1f0afa1cd61a1c26e3408a	F301_o_NA	38	0.00542443	0.0512465	1.60912	Oligo	Peripheral	Fungi	#N/A	#N/A	#N/A	#N/A	#N/A	#N/A
2f181c117d46e6ed6617b36c0a58e00b	F545_o_NA	38	0.0032738	0.0512465	1.60912	Oligo	Peripheral	Fungi	#N/A	#N/A	#N/A	#N/A	#N/A	#N/A
315ddad75f6ed486abe52360f7b24b72	F446_unidentified	38	0.00500318	0.236842	1.27311	Oligo	Peripheral	Fungi	unidentified	unidentified	unidentified	unidentified	unidentified	unidentified
b54635cd0998f5e4b454fa626fcde183	F877_o_Sordariales	38	0.0039707	0.145429	1.44112	Oligo	Peripheral	Fungi	Ascomycota	Sordariomycetes	Sordariales	#N/A	#N/A	#N/A
a58a52609ec817ded9f2495d0ebc2d39	A96_uncultured euryarchaeote	37	0.00396246	0.102264	1.44112	Oligo	Peripheral	Archaea	Nanoarchaeaeota	Woesearchaeia	uncultured euryarchaeote	uncultured euryarchaeote	uncultured euryarchaeote	uncultured euryarchaeote
KX504771.1.1499	B2181_Ellin6067	37	1.75624e-06	0.271731	-0.161929	Oligo	Peripheral	Bacteria	Proteobacteria	Gammaproteobacteria	Betaproteobacteriales	Nitrosomonadaceae	Ellin6067	uncultured prokaryote
1deffbe3ac4a1ac8a3fc666a886873bc	F214_o_NA	37	0.00293656	0.0525931	1.52512	Oligo	Peripheral	Fungi	#N/A	#N/A	#N/A	#N/A	#N/A	#N/A
8615824f2ead894eba247605bd8a6329	F55_o_NA	37	0.00290301	0	1.60912	Oligo	Peripheral	Fungi	Ascomycota	#N/A	#N/A	#N/A	#N/A	#N/A
SH195231.07FU_EF029232_reps	F71_Spirosphaera	37	0.00527226	0.149014	1.35711	Oligo	Peripheral	Fungi	Ascomycota	Leotiomycetes	Helotiales	Helotiales_fam_Incertae_sedis	Spirosphaera	Spirosphaera_carici-graminis
SH526505.07FU_JX327649_reps	F89_Talaromyces	37	0.00658199	0.0525931	1.52512	Oligo	Peripheral	Fungi	Ascomycota	Eurotiomycetes	Eurotiales	Trichocomaceae	Talaromyces	Talaromyces_thailandensis
CU916921.1.1330	A67_unidentified archaeon	36	0.00632235	0.277778	1.02109	Oligo	Peripheral	Archaea	Crenarchaeota	Bathyarchaeia	unidentified archaeon	unidentified archaeon	unidentified archaeon	unidentified archaeon
AB240314.1.1514	B95_o_RCP2-54	36	0.00487963	0.285494	1.02109	Oligo	Peripheral	Bacteria	Proteobacteria	Deltaproteobacteria	RCP2-54	#N/A	#N/A	#N/A
AB672250.1.1470	B51_f_uncultured	36	4.66211e-06	0.0540123	0.352594	Oligo	Peripheral	Bacteria	Actinobacteria	Thermoleophilia	Gaiellales	uncultured	#N/A	#N/A
AY133074.1.1424	B822_uncultured Termite group 1 bacterium	36	0.00260557	0.152778	1.27311	Oligo	Peripheral	Bacteria	Elusimicrobia	Elusimicrobia	Lineage IV	uncultured Termite group 1 bacterium	uncultured Termite group 1 bacterium	uncultured Termite group 1 bacterium
FQ658557.1.1361	B525_Ferruginibacter	36	0.00764404	0.285494	1.02109	Oligo	Peripheral	Bacteria	Bacteroidetes	Bacteroidia	Chitinophagales	Chitinophagaceae	Ferruginibacter	uncultured soil bacterium
EF516175.1.1456	B111_uncultured delta proteobacterium	35	0.00324995	0.339592	0.853084	Oligo	Peripheral	Bacteria	Proteobacteria	Gammaproteobacteria	Betaproteobacteriales	A21b	uncultured delta proteobacterium	uncultured delta proteobacterium
EU677401.1.1355	B355_uncultured	35	0.00324715	0.109388	1.27311	Oligo	Peripheral	Bacteria	Chloroflexi	Chloroflexia	Chloroflexales	Roseiflexaceae	uncultured	uncultured bacterium
FPLS01060366.2.1408	B2835_uncultured	35	1.0648e-05	0	0.223159	Oligo	Peripheral	Bacteria	Proteobacteria	Deltaproteobacteria	Myxococcales	Polyangiaceae	uncultured	#N/A
KC527617.1.1267	B1780_Flavobacterium	35	2.81987e-06	0	0.223159	Oligo	Peripheral	Bacteria	Bacteroidetes	Bacteroidia	Flavobacteriales	Flavobacteriaceae	Flavobacterium	#N/A
e16cf6395643ccdffeac747ab0c3e241	A362_uncultured archaeon	34	1.43823e-06	0.110727	-0.16521	Oligo	Peripheral	Archaea	Nanoarchaeaeota	Woesearchaeia	uncultured archaeon	uncultured archaeon	uncultured archaeon	uncultured archaeon
FJ946615.1.1290	B849_Clostridium sensu stricto 13	34	0.000652344	0.299308	0.853084	Oligo	Peripheral	Bacteria	Firmicutes	Clostridia	Clostridiales	Clostridiaceae 1	Clostridium sensu stricto 13	#N/A
JF265691.1.1384	B301_uncultured candidate division SPAM bacterium	34	3.46914e-07	0.1609	-0.161929	Oligo	Peripheral	Bacteria	Rokubacteria	NC10	Rokubacteriales	uncultured candidate division SPAM bacterium	uncultured candidate division SPAM bacterium	uncultured candidate division SPAM bacterium
KY883367.1.1383	B1392_o_uncultured	34	0.00550949	0.0570934	1.27311	Oligo	Peripheral	Bacteria	Nitrospirae	Thermodesulfovibrionia	uncultured	#N/A	#N/A	#N/A
3652779b35248219c4ebe6ee851d012a	F1029_unidentified	34	0.00248847	0	1.35711	Oligo	Peripheral	Fungi	unidentified	unidentified	unidentified	unidentified	unidentified	unidentified
8bc0e7a2fd4282a0b16f39245e097318	F912_unidentified	34	0.000870704	0.0570934	1.27311	Oligo	Peripheral	Fungi	Rozellomycota	unidentified	unidentified	unidentified	unidentified	unidentified
70a6f67e06d5c5ce80995086759df75f	B4210_Candidatus Competibacter	33	7.30985e-07	0	0.0936845	Oligo	Peripheral	Bacteria	Proteobacteria	Gammaproteobacteria	Competibacterales	Competibacteraceae	Candidatus Competibacter	anaerobic digester metagenome
AJ458505.1.1405	B13_Methylocystis	33	0.00649906	0.113866	1.1051	Oligo	Peripheral	Bacteria	Proteobacteria	Alphaproteobacteria	Rhizobiales	Beijerinckiaceae	Methylocystis	#N/A
HM445147.1.1343	B395_f_uncultured	33	3.3981e-06	0	0.0842927	Oligo	Peripheral	Bacteria	Acidobacteria	Acidobacteriia	Acidobacteriales	uncultured	#N/A	#N/A
JF129097.1.1358	B688_uncultured Planctomyces sp.	33	0.000686412	0	1.27311	Oligo	Peripheral	Bacteria	Planctomycetes	Planctomycetacia	Planctomycetales	uncultured	uncultured Planctomyces sp.	uncultured Planctomyces sp.
301c40af2ee2c6c4602bcb1203299499	F312_unidentified	33	1.16082e-06	0.113866	-0.193316	Oligo	Peripheral	Fungi	unidentified	unidentified	unidentified	unidentified	unidentified	unidentified
9293cc6f4d3087146832195f4a22aa2b	F83_o_NA	33	0.00382695	0	1.27311	Oligo	Peripheral	Fungi	Basidiomycota	Agaricomycetes	#N/A	#N/A	#N/A	#N/A
a2a12c781efbdb335bb496094e2244bc	F384_Glaciozyma	33	0.00508841	0.297521	0.76908	Oligo	Peripheral	Fungi	Basidiomycota	Microbotryomycetes	Kriegeriales	Camptobasidiaceae	Glaciozyma	Glaciozyma_antarctica
39c5e2e44603f5ed068e4e59407e38a4	B554_uncultured	32	8.61715e-08	0.169922	-0.218871	Oligo	Peripheral	Bacteria	Chloroflexi	Chloroflexia	Chloroflexales	Roseiflexaceae	uncultured	uncultured bacterium
FJ946559.1.1290	B450_IS-44	32	0.00335487	0.173828	0.937089	Oligo	Peripheral	Bacteria	Proteobacteria	Gammaproteobacteria	Betaproteobacteriales	Nitrosomonadaceae	IS-44	#N/A
HM773455.1.1237	B379_Devosia	32	0.00114818	0.271484	0.76908	Oligo	Peripheral	Bacteria	Proteobacteria	Alphaproteobacteria	Rhizobiales	Devosiaceae	Devosia	#N/A
LN590653.1.1220	A82_Candidatus Nitrosoarchaeum	31	0.00459797	0.062435	1.02109	Oligo	Peripheral	Archaea	Thaumarchaeota	Nitrososphaeria	Nitrosopumilales	Nitrosopumilaceae	Candidatus Nitrosoarchaeum	#N/A
AB240237.1.1458	B88_o_NA	31	0.00478741	0.278876	0.685076	Oligo	Peripheral	Bacteria	Chloroflexi	JG30-KF-CM66	#N/A	#N/A	#N/A	#N/A
AB672248.1.1444	B668_o_NA	31	0.000820601	0.120708	0.937089	Oligo	Peripheral	Bacteria	Actinobacteria	MB-A2-108	#N/A	#N/A	#N/A	#N/A
e64dfecc4e48a525d0d773c6eebd53da	B656_o_NA	31	0.00668625	0.122789	0.937089	Oligo	Peripheral	Bacteria	Chloroflexi	JG30-KF-CM66	#N/A	#N/A	#N/A	#N/A
EF019039.1.1332	B94_f_Micropepsaceae	31	0.00263242	0.062435	1.02109	Oligo	Peripheral	Bacteria	Proteobacteria	Alphaproteobacteria	Micropepsales	Micropepsaceae	#N/A	#N/A
EU937887.1.1477	B821_uncultured bacterium	31	0.00857191	0.330905	0.601071	Oligo	Peripheral	Bacteria	Bacteroidetes	Ignavibacteria	SJA-28	uncultured bacterium	uncultured bacterium	uncultured bacterium
FPLL01006255.18.1277	B397_Reyranella	31	0.000852322	0	1.1051	Oligo	Peripheral	Bacteria	Proteobacteria	Alphaproteobacteria	Reyranellales	Reyranellaceae	Reyranella	#N/A
FQ658753.1.1361	B491_Sideroxydans	31	0.00274738	0	1.1051	Oligo	Peripheral	Bacteria	Proteobacteria	Gammaproteobacteria	Betaproteobacteriales	Gallionellaceae	Sideroxydans	uncultured Gallionellaceae bacterium
HM243962.1.1465	B494_uncultured	31	0.00197993	0	1.1051	Oligo	Peripheral	Bacteria	Chloroflexi	Anaerolineae	Anaerolineales	Anaerolineaceae	uncultured	#N/A
HQ674937.1.1489	B631_f_uncultured	31	0.000908482	0	1.1051	Oligo	Peripheral	Bacteria	Acidobacteria	Acidobacteriia	Acidobacteriales	uncultured	#N/A	#N/A
KP717958.1.1215	B102_f_Micrococcaceae	31	0.00752151	0.322581	0.601071	Oligo	Peripheral	Bacteria	Actinobacteria	Actinobacteria	Micrococcales	Micrococcaceae	#N/A	#N/A
3aaf0119060828f8bf63d08c3add064f	F2572_unidentified	31	0.000921052	0	1.1051	Oligo	Peripheral	Fungi	unidentified	unidentified	unidentified	unidentified	unidentified	unidentified
f3b584bcc83da302b2191efb20cd450d	F212_Penicillium	31	0.00228509	0	1.1051	Oligo	Peripheral	Fungi	Ascomycota	Eurotiomycetes	Eurotiales	Aspergillaceae	Penicillium	#N/A
HQ269186.1.966	A20_Rice Cluster I	30	0.00141171	0	1.02109	Oligo	Peripheral	Archaea	Euryarchaeota	Methanomicrobia	Methanocellales	Methanocellaceae	Rice Cluster I	#N/A
88ceef3e0b4142205141bfa3924f5b0e	B4753_uncultured proteobacterium	30	0.000215623	0	1.02109	Oligo	Peripheral	Bacteria	Nitrospirae	4-29-1	uncultured proteobacterium	uncultured proteobacterium	uncultured proteobacterium	uncultured proteobacterium
FN827226.1.1312	B1680_Ferribacterium	30	0.000860317	0	1.02109	Oligo	Peripheral	Bacteria	Proteobacteria	Gammaproteobacteria	Betaproteobacteriales	Rhodocyclaceae	Ferribacterium	#N/A
FPLS01021807.22.1287	B1732_f_Burkholderiaceae	30	0.00359719	0.497778	-0.322977	Oligo	Peripheral	Bacteria	Proteobacteria	Gammaproteobacteria	Betaproteobacteriales	Burkholderiaceae	#N/A	#N/A
JF198754.1.1364	B373_Arenimonas	30	0.0025409	0.18	0.76908	Oligo	Peripheral	Bacteria	Proteobacteria	Gammaproteobacteria	Xanthomonadales	Xanthomonadaceae	Arenimonas	#N/A
KC331393.1.1356	B1274_Roseomonas	30	0.00139796	0.0644444	0.937089	Oligo	Peripheral	Bacteria	Proteobacteria	Alphaproteobacteria	Acetobacterales	Acetobacteraceae	Roseomonas	#N/A
525cee72ea029019dd44bda827237ded	F992_Coprinellus	30	0.00298953	0.464444	0.0970448	Oligo	Peripheral	Fungi	Basidiomycota	Agaricomycetes	Agaricales	Psathyrellaceae	Coprinellus	#N/A
626f39fca000a64bb62ac8f64c50fbea	F677_Kurtzmanomyces	30	0.00166436	0.124444	0.853084	Oligo	Peripheral	Fungi	Basidiomycota	Agaricostilbomycetes	Agaricostilbales	Chionosphaeraceae	Kurtzmanomyces	unidentified
e6c5ba773c48cd47c53f8aba2ca3ddeb	F2903_unidentified	30	0.0005456	0.184444	0.76908	Oligo	Peripheral	Fungi	unidentified	unidentified	unidentified	unidentified	unidentified	unidentified
e7ab848bba8c4b3df37a8bf6e2773fbd	B163_uncultured Bellilinea sp.	29	0.00218099	1.11022e-16	0.937089	Oligo	Peripheral	Bacteria	Chloroflexi	Anaerolineae	uncultured Bellilinea sp.	uncultured Bellilinea sp.	uncultured Bellilinea sp.	uncultured Bellilinea sp.
EF018755.1.1366	B331_f_uncultured	29	0.00197811	1.11022e-16	0.937089	Oligo	Peripheral	Bacteria	Acidobacteria	Acidobacteriia	Acidobacteriales	uncultured	#N/A	#N/A
EF020275.1.1401	B706_uncultured proteobacterium	29	0.00208624	1.11022e-16	0.937089	Oligo	Peripheral	Bacteria	Acidobacteria	Blastocatellia (Subgroup 4)	Elev-16S-573	uncultured proteobacterium	uncultured proteobacterium	uncultured proteobacterium
GU208322.1.1466	B224_uncultured prokaryote	29	1.88803e-06	1.11022e-16	-0.312338	Oligo	Peripheral	Bacteria	Nitrospinae	P9X2b3D02	uncultured prokaryote	uncultured prokaryote	uncultured prokaryote	uncultured prokaryote
HM341127.1.1337	B117_uncultured Ferrimicrobium sp.	29	0.00103088	1.11022e-16	0.937089	Oligo	Peripheral	Bacteria	Actinobacteria	Acidimicrobiia	IMCC26256	uncultured Ferrimicrobium sp.	uncultured Ferrimicrobium sp.	uncultured Ferrimicrobium sp.
JF175337.1.1357	B845_Terrimonas	29	0.00193754	0.0665874	0.853084	Oligo	Peripheral	Bacteria	Bacteroidetes	Bacteroidia	Chitinophagales	Chitinophagaceae	Terrimonas	#N/A
054a221f9fbccbb1d7def3b16a441239	F1062_o_NA	29	0.00466658	0.130797	0.76908	Oligo	Peripheral	Fungi	#N/A	#N/A	#N/A	#N/A	#N/A	#N/A
fae4f3bd3a235599af8a2abe82b8f3ce	F970_o_NA	29	0.0026911	1.11022e-16	0.937089	Oligo	Peripheral	Fungi	#N/A	#N/A	#N/A	#N/A	#N/A	#N/A
bcbe8d338c7a2f2b761a3672dc731b15	A588_o_NA	28	0.000547737	0.244898	0.517067	Oligo	Peripheral	Archaea	Nanoarchaeaeota	Woesearchaeia	#N/A	#N/A	#N/A	#N/A
KC926106.1.912	A43_uncultured euryarchaeote	28	0.00161057	1.11022e-16	0.853084	Oligo	Peripheral	Archaea	Crenarchaeota	Bathyarchaeia	uncultured euryarchaeote	uncultured euryarchaeote	uncultured euryarchaeote	uncultured euryarchaeote
1be262857b0a20871e88cc8e17288ed5	B157_o_RBG-13-54-9	28	0.00221764	0.0688776	0.76908	Oligo	Peripheral	Bacteria	Chloroflexi	Anaerolineae	RBG-13-54-9	#N/A	#N/A	#N/A
AB426203.1.1437	B72_Desulfobacca	28	0.00171314	1.11022e-16	0.853084	Oligo	Peripheral	Bacteria	Proteobacteria	Deltaproteobacteria	Syntrophobacterales	Syntrophaceae	Desulfobacca	uncultured Desulfobacca sp.
c182bf673157b85f23b06e03a27b8e9c	B4973_Conexibacter	28	0.000239182	1.11022e-16	0.853084	Oligo	Peripheral	Bacteria	Actinobacteria	Thermoleophilia	Solirubrobacterales	Solirubrobacteraceae	Conexibacter	#N/A
HQ597366.1.1474	B980_o_NA	28	0.00134217	1.11022e-16	0.853084	Oligo	Peripheral	Bacteria	Acidobacteria	Subgroup 11	#N/A	#N/A	#N/A	#N/A
JX001221.1.1476	B203_uncultured Sorangiineae bacterium	28	0.00129796	1.11022e-16	0.853084	Oligo	Peripheral	Bacteria	Proteobacteria	Deltaproteobacteria	Myxococcales	BIrii41	uncultured Sorangiineae bacterium	uncultured Sorangiineae bacterium
JX489946.1.1490	B384_UTBCD1	28	0.000624109	1.11022e-16	0.853084	Oligo	Peripheral	Bacteria	Bacteroidetes	Bacteroidia	Chitinophagales	Chitinophagaceae	UTBCD1	uncultured bacterium
JX504917.1.1434	B1315_uncultured	28	1.81859e-06	1.11022e-16	-0.340996	Oligo	Peripheral	Bacteria	Chloroflexi	Anaerolineae	Anaerolineales	Anaerolineaceae	uncultured	#N/A
KJ636966.1.1343	B6257_Nostoc PCC-7107	28	5.30768e-07	1.11022e-16	-0.0238567	Oligo	Peripheral	Bacteria	Cyanobacteria	Oxyphotobacteria	Nostocales	Nostocaceae	Nostoc PCC-7107	#N/A
7b0cc59e739a0376a43d81603f5d616c	F2104_o_NA	28	0.000835644	1.11022e-16	0.853084	Oligo	Peripheral	Fungi	#N/A	#N/A	#N/A	#N/A	#N/A	#N/A
e592c9ec5c4e2714d7a5bdf1acfdf29a	F246_o_NA	28	0.00251209	1.11022e-16	0.853084	Oligo	Peripheral	Fungi	#N/A	#N/A	#N/A	#N/A	#N/A	#N/A
AB685270.1.1475	B242_Nakamurella	27	0.00116989	0.41701	0.0970448	Oligo	Peripheral	Bacteria	Actinobacteria	Actinobacteria	Frankiales	Nakamurellaceae	Nakamurella	#N/A
c0a962a0e4e98dbde51a9c5a14fec396	B1574_f_Anaerolineaceae	27	9.52683e-07	1.11022e-16	-0.369654	Oligo	Peripheral	Bacteria	Chloroflexi	Anaerolineae	Anaerolineales	Anaerolineaceae	#N/A	#N/A
CU466895.1.1355	B2264_f_Rhodocyclaceae	27	0.000703651	0.137174	0.601071	Oligo	Peripheral	Bacteria	Proteobacteria	Gammaproteobacteria	Betaproteobacteriales	Rhodocyclaceae	#N/A	#N/A
d347e050cde16e5edacacb1a5a4310f4	B459_uncultured Bellilinea sp.	27	0.000830942	1.11022e-16	0.76908	Oligo	Peripheral	Bacteria	Chloroflexi	Anaerolineae	uncultured Bellilinea sp.	uncultured Bellilinea sp.	uncultured Bellilinea sp.	uncultured Bellilinea sp.
EF516780.1.1446	B1059_Gemmatimonas	27	0.00065699	1.11022e-16	0.76908	Oligo	Peripheral	Bacteria	Gemmatimonadetes	Gemmatimonadetes	Gemmatimonadales	Gemmatimonadaceae	Gemmatimonas	#N/A
EU133814.1.1260	B2149_Ellin6067	27	0.00243887	0.260631	0.433062	Oligo	Peripheral	Bacteria	Proteobacteria	Gammaproteobacteria	Betaproteobacteriales	Nitrosomonadaceae	Ellin6067	#N/A
FPLS01042937.16.1489	B4331_uncultured soil bacterium	27	1.73922e-06	0.0713306	-0.0018755	Oligo	Peripheral	Bacteria	Chloroflexi	Anaerolineae	SBR1031	A4b	uncultured soil bacterium	uncultured soil bacterium
JN038974.1.1486	B629_o_NA	27	0.000775351	0.137174	0.601071	Oligo	Peripheral	Bacteria	Acidobacteria	Subgroup 18	#N/A	#N/A	#N/A	#N/A
JX120395.1.1511	B2744_uncultured Nitrospiraceae bacterium	27	0.000352553	0.0713306	0.685076	Oligo	Peripheral	Bacteria	Nitrospirae	Thermodesulfovibrionia	uncultured	uncultured Nitrospiraceae bacterium	uncultured Nitrospiraceae bacterium	uncultured Nitrospiraceae bacterium
229a2af1474ae085de80a2c844848a66	F652_o_NA	27	0.00305295	1.11022e-16	0.76908	Oligo	Peripheral	Fungi	#N/A	#N/A	#N/A	#N/A	#N/A	#N/A
73202cbdd436a1a4c82f9c131a1ad2bd	F1419_o_NA	27	0.00299425	1.11022e-16	0.76908	Oligo	Peripheral	Fungi	#N/A	#N/A	#N/A	#N/A	#N/A	#N/A
b7a83945b1d32012b5135c5afeef9811	F2654_unidentified	27	0.00288256	0.137174	0.601071	Oligo	Peripheral	Fungi	unidentified	unidentified	unidentified	unidentified	unidentified	unidentified
SH349512.07FU_HQ185338_refs	F306_Pseudallescheria	27	0.00228321	0.0713306	0.685076	Oligo	Peripheral	Fungi	Ascomycota	Sordariomycetes	Microascales	Microascaceae	Pseudallescheria	Pseudallescheria_boydii
AB240352.1.1493	B202_Ignavibacterium	26	0.000967835	0	0.685076	Oligo	Peripheral	Bacteria	Bacteroidetes	Ignavibacteria	Ignavibacteriales	Ignavibacteriaceae	Ignavibacterium	uncultured bacterium
EU133641.1.1362	B794_f_Chitinophagaceae	26	0.00172596	0	0.685076	Oligo	Peripheral	Bacteria	Bacteroidetes	Bacteroidia	Chitinophagales	Chitinophagaceae	#N/A	#N/A
EU135570.1.1394	B1193_metagenome	26	0.000696338	0.260355	0.349058	Oligo	Peripheral	Bacteria	Latescibacteria	Latescibacteria	Latescibacterales	Latescibacteraceae	metagenome	metagenome
GQ339116.1.1476	B1686_uncultured	26	0.001762	0.14497	0.517067	Oligo	Peripheral	Bacteria	Gemmatimonadetes	Gemmatimonadetes	Gemmatimonadales	Gemmatimonadaceae	uncultured	uncultured Nitrospira sp.
HM317725.1.1360	B2707_Tahibacter	26	0.00411815	0	0.685076	Oligo	Peripheral	Bacteria	Proteobacteria	Gammaproteobacteria	Xanthomonadales	Rhodanobacteraceae	Tahibacter	uncultured bacterium
JN038942.1.1513	B2949_uncultured delta proteobacterium	26	2.02155e-06	0	-0.0944326	Oligo	Peripheral	Bacteria	Proteobacteria	Deltaproteobacteria	Myxococcales	BIrii41	uncultured delta proteobacterium	uncultured delta proteobacterium
KR857366.1.1379	B186_Cryobacterium	26	0.00205979	0	0.685076	Oligo	Peripheral	Bacteria	Actinobacteria	Actinobacteria	Micrococcales	Microbacteriaceae	Cryobacterium	#N/A
2ca6d8f0d5382e46152f7c60055d06e3	F215_unidentified	26	0.00139288	0	0.685076	Oligo	Peripheral	Fungi	unidentified	unidentified	unidentified	unidentified	unidentified	unidentified
52207ebf9f7b19f0845a25956c61c46b	F570_Mortierella	26	0.0022289	0.0739645	0.601071	Oligo	Peripheral	Fungi	Mortierellomycota	Mortierellomycetes	Mortierellales	Mortierellaceae	Mortierella	unidentified
SH201185.07FU_HE977527_reps	F190_Schizothecium	26	0.00148653	0	0.685076	Oligo	Peripheral	Fungi	Ascomycota	Sordariomycetes	Sordariales	Lasiosphaeriaceae	Schizothecium	#N/A
44de0f18468ca1b63d521511c2eb223d	A213_uncultured euryarchaeote	25	0.000992933	0.2112	0.349058	Oligo	Peripheral	Archaea	Nanoarchaeaeota	Woesearchaeia	uncultured euryarchaeote	uncultured euryarchaeote	uncultured euryarchaeote	uncultured euryarchaeote
595825b99eeb68c019afd3e1ba1ce407	A429_uncultured euryarchaeote	25	0.000258371	0.0768	0.517067	Oligo	Peripheral	Archaea	Nanoarchaeaeota	Woesearchaeia	uncultured euryarchaeote	uncultured euryarchaeote	uncultured euryarchaeote	uncultured euryarchaeote
EF019967.1.1344	B139_uncultured Iamiaceae bacterium	25	0.00103557	0	0.601071	Oligo	Peripheral	Bacteria	Actinobacteria	Acidimicrobiia	Microtrichales	uncultured	uncultured Iamiaceae bacterium	uncultured Iamiaceae bacterium
HM270072.1.1359	B973_Acidibacter	25	0.00137407	0.0768	0.517067	Oligo	Peripheral	Bacteria	Proteobacteria	Gammaproteobacteria	Gammaproteobacteria Incertae Sedis	Unknown Family	Acidibacter	#N/A
JX505138.1.1478	B17_uncultured Thermaerobacter sp.	25	0.0022551	0.0768	0.517067	Oligo	Peripheral	Bacteria	Acidobacteria	Holophagae	Subgroup 7	uncultured Thermaerobacter sp.	uncultured Thermaerobacter sp.	uncultured Thermaerobacter sp.
KF287738.1.1498	B2736_MND1	25	0.00206818	0.1504	0.433062	Oligo	Peripheral	Bacteria	Proteobacteria	Gammaproteobacteria	Betaproteobacteriales	Nitrosomonadaceae	MND1	Thiobacter sp. enrichment culture clone 35Fe79
KF515272.1.1522	B128_Syntrophorhabdus	25	0.000940464	0	0.601071	Oligo	Peripheral	Bacteria	Proteobacteria	Deltaproteobacteria	Deltaproteobacteria Incertae Sedis	Syntrophorhabdaceae	Syntrophorhabdus	uncultured Syntrophorhabdaceae bacterium
KX984117.1.1262	B372_Clostridium sensu stricto 1	25	0.000388619	0.2112	0.349058	Oligo	Peripheral	Bacteria	Firmicutes	Clostridia	Clostridiales	Clostridiaceae 1	Clostridium sensu stricto 1	#N/A
AB672291.1.1441	B2669_uncultured alpha proteobacterium	24	9.57719e-07	0	-0.139441	Oligo	Peripheral	Bacteria	Actinobacteria	MB-A2-108	uncultured alpha proteobacterium	uncultured alpha proteobacterium	uncultured alpha proteobacterium	uncultured alpha proteobacterium
AM071371.1.1214	B21_f_Xanthobacteraceae	24	0.000867837	0	0.517067	Oligo	Peripheral	Bacteria	Proteobacteria	Alphaproteobacteria	Rhizobiales	Xanthobacteraceae	#N/A	#N/A
HE974782.1.1498	B3271_o_NA	24	0.00412175	0.152778	0.349058	Oligo	Peripheral	Bacteria	Acidobacteria	Subgroup 18	#N/A	#N/A	#N/A	#N/A
HQ462540.1.1254	B54_Oryzihumus	24	0.0016846	0.152778	0.349058	Oligo	Peripheral	Bacteria	Actinobacteria	Actinobacteria	Micrococcales	Intrasporangiaceae	Oryzihumus	#N/A
JF204278.1.1369	B2864_f_67-14	24	0.000393931	0.375	0.0130404	Oligo	Peripheral	Bacteria	Actinobacteria	Thermoleophilia	Solirubrobacterales	67-14	#N/A	#N/A
JQ245645.1.1418	B863_uncultured bacterium	24	0.00192205	0.277778	0.181049	Oligo	Peripheral	Bacteria	Actinobacteria	Coriobacteriia	FS118-23B-02	uncultured bacterium	uncultured bacterium	uncultured bacterium
JQ861279.1.1498	B1337_f_SC-I-84	24	0.00174601	0	0.517067	Oligo	Peripheral	Bacteria	Proteobacteria	Gammaproteobacteria	Betaproteobacteriales	SC-I-84	#N/A	#N/A
KJ192001.1.1498	B136_f_SC-I-84	24	0.00248304	0.0798611	0.433062	Oligo	Peripheral	Bacteria	Proteobacteria	Gammaproteobacteria	Betaproteobacteriales	SC-I-84	#N/A	#N/A
KP992878.1.1271	B256_Mesorhizobium	24	7.94761e-05	0.375	-0.35576	Oligo	Peripheral	Bacteria	Proteobacteria	Alphaproteobacteria	Rhizobiales	Rhizobiaceae	Mesorhizobium	#N/A
KX913930.1.1226	B3576_Nostoc PCC-7107	24	0.000832498	0	0.517067	Oligo	Peripheral	Bacteria	Cyanobacteria	Oxyphotobacteria	Nostocales	Nostocaceae	Nostoc PCC-7107	#N/A
9e3870d6776e529652253c7e976e34ff	F72_o_NA	24	0.00222431	0.152778	0.349058	Oligo	Peripheral	Fungi	#N/A	#N/A	#N/A	#N/A	#N/A	#N/A
JN649123.1.1042	A9_Methanoregula	23	0.00157417	0	0.433062	Oligo	Peripheral	Archaea	Euryarchaeota	Methanomicrobia	Methanomicrobiales	Methanoregulaceae	Methanoregula	#N/A
3b10447ea379f98c8931ea893d937d4e	B613_o_uncultured	23	0.00023976	0.0831758	0.349058	Oligo	Peripheral	Bacteria	Nitrospirae	Thermodesulfovibrionia	uncultured	#N/A	#N/A	#N/A
AB364845.1.1446	B332_uncultured bacterium	23	0.000451006	0	0.433062	Oligo	Peripheral	Bacteria	Nitrospirae	Thermodesulfovibrionia	uncultured	uncultured bacterium	uncultured bacterium	uncultured bacterium
AZUN01000001.2395004.2396518	B192_f_Methylomonaceae	23	0.00101016	0	0.433062	Oligo	Peripheral	Bacteria	Proteobacteria	Gammaproteobacteria	Methylococcales	Methylomonaceae	#N/A	#N/A
EF018692.1.1326	B1200_Hyphomicrobium	23	0.000118142	0	0.433062	Oligo	Peripheral	Bacteria	Proteobacteria	Alphaproteobacteria	Rhizobiales	Hyphomicrobiaceae	Hyphomicrobium	uncultured Hyphomicrobiaceae bacterium
EU276438.1.1487	B606_unidentified	23	0.0014982	0	0.433062	Oligo	Peripheral	Bacteria	Acidobacteria	Subgroup 6	unidentified	unidentified	unidentified	unidentified
JX505184.1.1417	B265_uncultured eubacterium WCHB1-50	23	0.000233671	0	0.433062	Oligo	Peripheral	Bacteria	Chloroflexi	Anaerolineae	RBG-13-54-9	uncultured eubacterium WCHB1-50	uncultured eubacterium WCHB1-50	uncultured eubacterium WCHB1-50
7f3e3490244f1eb8d92ee6b8dfb6482d	F1161_o_NA	23	0.00103923	0	0.433062	Oligo	Peripheral	Fungi	#N/A	#N/A	#N/A	#N/A	#N/A	#N/A
a27a69d313ca6931e9076302f6cbb80e	F103_o_NA	23	0.00214259	0	0.433062	Oligo	Peripheral	Fungi	#N/A	#N/A	#N/A	#N/A	#N/A	#N/A
baf55d1697888609f997ec4e0e3d12c4	F136_Spirosphaera	23	0.00190899	0	0.433062	Oligo	Peripheral	Fungi	Ascomycota	Leotiomycetes	Helotiales	Helotiales_fam_Incertae_sedis	Spirosphaera	Spirosphaera_carici-graminis
SH215237.07FU_KM519317_reps	F277_o_Sordariales	23	0.00583164	0.298677	0.0970448	Oligo	Peripheral	Fungi	Ascomycota	Sordariomycetes	Sordariales	#N/A	#N/A	#N/A
AVSQ01000019.27413.28870	A224_Candidatus Nitrosotenuis	22	0.000409882	0.0867769	0.265054	Oligo	Peripheral	Archaea	Thaumarchaeota	Nitrososphaeria	Nitrosopumilales	Nitrosopumilaceae	Candidatus Nitrosotenuis	#N/A
HQ532941.1.921	A5_uncultured methanogenic archaeon	22	0.000662026	0	0.349058	Oligo	Peripheral	Archaea	Crenarchaeota	Bathyarchaeia	uncultured methanogenic archaeon	uncultured methanogenic archaeon	uncultured methanogenic archaeon	uncultured methanogenic archaeon
AB240368.1.1441	B850_uncultured	22	0.000563529	0	0.349058	Oligo	Peripheral	Bacteria	Chloroflexi	Chloroflexia	Chloroflexales	Roseiflexaceae	uncultured	uncultured bacterium
DQ138964.1.1518	B132_uncultured bacterium	22	0.00109453	0	0.349058	Oligo	Peripheral	Bacteria	Nitrospirae	4-29-1	uncultured bacterium	uncultured bacterium	uncultured bacterium	uncultured bacterium
EF516799.1.1402	B46_Bryobacter	22	0.000910501	0	0.349058	Oligo	Peripheral	Bacteria	Acidobacteria	Acidobacteriia	Solibacterales	Solibacteraceae (Subgroup 3)	Bryobacter	#N/A
GQ111265.1.1365	B182_f_uncultured	22	0.00115593	0.0867769	0.265054	Oligo	Peripheral	Bacteria	Actinobacteria	Thermoleophilia	Gaiellales	uncultured	#N/A	#N/A
JN038609.1.1518	B8311_uncultured	22	0.000106635	0.0867769	-0.218513	Oligo	Peripheral	Bacteria	Proteobacteria	Deltaproteobacteria	Desulfarculales	Desulfarculaceae	uncultured	metagenome
JX133301.1.1512	B577_Gaiella	22	0.00137219	0.165289	0.181049	Oligo	Peripheral	Bacteria	Actinobacteria	Thermoleophilia	Gaiellales	Gaiellaceae	Gaiella	#N/A
JX222097.1.1289	B115_f_Micrococcaceae	22	0.000970637	0	0.349058	Oligo	Peripheral	Bacteria	Actinobacteria	Actinobacteria	Micrococcales	Micrococcaceae	#N/A	#N/A
KF515264.1.1459	B3_uncultured prokaryote	22	0.00103829	0	0.349058	Oligo	Peripheral	Bacteria	Chloroflexi	Anaerolineae	RBG-13-54-9	uncultured prokaryote	uncultured prokaryote	uncultured prokaryote
086c8d60cc6876354b435016060fe3d7	F2789_o_NA	22	0.000328187	0	0.349058	Oligo	Peripheral	Fungi	#N/A	#N/A	#N/A	#N/A	#N/A	#N/A
196066d9738f1d32bc3370448af0bdca	F1433_o_NA	22	0.000538765	0	0.349058	Oligo	Peripheral	Fungi	#N/A	#N/A	#N/A	#N/A	#N/A	#N/A
ece071fc0209acd6705f0f59dfcd0341	F1537_o_NA	22	0.00101508	0.165289	0.181049	Oligo	Peripheral	Fungi	#N/A	#N/A	#N/A	#N/A	#N/A	#N/A
8d174109455027962947d85bbb6d9159	B778_uncultured Caldilineaceae bacterium	21	0.0012545	0	0.265054	Oligo	Peripheral	Bacteria	Chloroflexi	Anaerolineae	RBG-13-54-9	uncultured Caldilineaceae bacterium	uncultured Caldilineaceae bacterium	uncultured Caldilineaceae bacterium
b39874043a9d7ba374c1baaa5242a86a	B2870_o_SJA-15	21	0.000768375	0.0907029	0.181049	Oligo	Peripheral	Bacteria	Chloroflexi	Anaerolineae	SJA-15	#N/A	#N/A	#N/A
FJ595545.1.1368	B1141_f_Archangiaceae	21	0.00056052	0.0907029	0.181049	Oligo	Peripheral	Bacteria	Proteobacteria	Deltaproteobacteria	Myxococcales	Archangiaceae	#N/A	#N/A
FJ936918.1.1496	B411_o_Betaproteobacteriales	21	0.000704165	0	0.265054	Oligo	Peripheral	Bacteria	Proteobacteria	Gammaproteobacteria	Betaproteobacteriales	#N/A	#N/A	#N/A
JF703493.1.1466	B637_uncultured	21	8.01297e-05	0.172336	0.0970448	Oligo	Peripheral	Bacteria	Proteobacteria	Gammaproteobacteria	Xanthomonadales	Xanthomonadaceae	uncultured	#N/A
JF833475.1.1465	B746_Candidatus Udaeobacter	21	0.00106428	0	0.265054	Oligo	Peripheral	Bacteria	Verrucomicrobia	Verrucomicrobiae	Chthoniobacterales	Chthoniobacteraceae	Candidatus Udaeobacter	#N/A
JO171658.113.1331	B129_f_Burkholderiaceae	21	0.000639331	0	0.265054	Oligo	Peripheral	Bacteria	Proteobacteria	Gammaproteobacteria	Betaproteobacteriales	Burkholderiaceae	#N/A	#N/A
KR779675.1.1326	B6704_uncultured prokaryote	21	1.17034e-08	0.0907029	-0.238189	Oligo	Peripheral	Bacteria	Chloroflexi	KD4-96	uncultured prokaryote	uncultured prokaryote	uncultured prokaryote	uncultured prokaryote
68ed1fe0b5a9b127585001979bbf4210	F1145_o_NA	21	0.000815118	0	0.265054	Oligo	Peripheral	Fungi	#N/A	#N/A	#N/A	#N/A	#N/A	#N/A
d671e91f5f1ae4ab482e6e329cc881d8	F2329_o_NA	21	0.000394234	0.0907029	0.181049	Oligo	Peripheral	Fungi	#N/A	#N/A	#N/A	#N/A	#N/A	#N/A
SH221298.07FU_HQ026746_refs	F1096_Aspergillus	21	1.65956e-08	0	-0.291391	Oligo	Peripheral	Fungi	Ascomycota	Eurotiomycetes	Eurotiales	Aspergillaceae	Aspergillus	Aspergillus_fumigatus
DQ450808.1.1391	B14_uncultured Nitrospirae bacterium	20	0.00130471	0	0.181049	Oligo	Peripheral	Bacteria	Nitrospirae	4-29-1	uncultured Nitrospirae bacterium	uncultured Nitrospirae bacterium	uncultured Nitrospirae bacterium	uncultured Nitrospirae bacterium
FPLS01007424.1.1315	B4574_wastewater metagenome	20	0.000147159	0.095	0.0970448	Oligo	Peripheral	Bacteria	Acidobacteria	Subgroup 6	wastewater metagenome	wastewater metagenome	wastewater metagenome	wastewater metagenome
HM335467.1.1308	B638_alphaI cluster	20	0.000640245	0	0.181049	Oligo	Peripheral	Bacteria	Proteobacteria	Alphaproteobacteria	Rhizobiales	Beijerinckiaceae	alphaI cluster	#N/A
JF120067.1.1353	B290_f_SC-I-84	20	0.00135418	0	0.181049	Oligo	Peripheral	Bacteria	Proteobacteria	Gammaproteobacteria	Betaproteobacteriales	SC-I-84	#N/A	#N/A
JN038981.1.1520	B1137_Syntrophobacter	20	0.00163873	0.335	-0.154968	Oligo	Peripheral	Bacteria	Proteobacteria	Deltaproteobacteria	Syntrophobacterales	Syntrophobacteraceae	Syntrophobacter	uncultured delta proteobacterium
KY190585.1.1447	B127_Gemmatimonas	20	0.000102677	0.095	0.0970448	Oligo	Peripheral	Bacteria	Gemmatimonadetes	Gemmatimonadetes	Gemmatimonadales	Gemmatimonadaceae	Gemmatimonas	metagenome
747988ff09e0885da4a8a31a80787d54	F3172_o_NA	20	0.000369776	0.095	0.0970448	Oligo	Peripheral	Fungi	#N/A	#N/A	#N/A	#N/A	#N/A	#N/A
a1d11bd585acef3dcaa06f947c552d06	F876_unidentified	20	0.000204275	0	0.181049	Oligo	Peripheral	Fungi	unidentified	unidentified	unidentified	unidentified	unidentified	unidentified
a8d7c7f3ceed107d617a875d5674f94b	B431_o_RBG-13-54-9	19	0.000438966	0	0.0970448	Oligo	Peripheral	Bacteria	Chloroflexi	Anaerolineae	RBG-13-54-9	#N/A	#N/A	#N/A
ac383a1eb0285329d4f7804f83106b2e	B2072_uncultured organism	19	1.74146e-06	0	-0.319707	Oligo	Peripheral	Bacteria	Actinobacteria	Thermoleophilia	Gaiellales	uncultured	uncultured organism	uncultured organism
d94800ca66a176d7e591ed018e6c1744	B2087_Subgroup 10	19	9.00801e-05	0.099723	0.0130404	Oligo	Peripheral	Bacteria	Acidobacteria	Thermoanaerobaculia	Thermoanaerobaculales	Thermoanaerobaculaceae	Subgroup 10	#N/A
DQ451520.1.1487	B497_uncultured	19	0.00143818	0.277008	-0.154968	Oligo	Peripheral	Bacteria	Proteobacteria	Gammaproteobacteria	Steroidobacterales	Steroidobacteraceae	uncultured	Hypsibius dujardini
e360d034d6b15e3ecbe7190cc0f911b2	B6689_uncultured Caldilineaceae bacterium	19	1.29899e-06	0.099723	-0.627578	Oligo	Peripheral	Bacteria	Chloroflexi	Anaerolineae	RBG-13-54-9	uncultured Caldilineaceae bacterium	uncultured Caldilineaceae bacterium	uncultured Caldilineaceae bacterium
FJ478843.1.1516	B3060_o_NA	19	0.000790056	0.465374	-0.490986	Oligo	Peripheral	Bacteria	Latescibacteria	#N/A	#N/A	#N/A	#N/A	#N/A
FJ893637.1.1306	B704_Sphingomonas	19	0.0030541	0.277008	-0.154968	Oligo	Peripheral	Bacteria	Proteobacteria	Alphaproteobacteria	Sphingomonadales	Sphingomonadaceae	Sphingomonas	#N/A
HE804507.1.1437	B1208_o_OPB41	19	3.61904e-08	0	-0.376159	Oligo	Peripheral	Bacteria	Actinobacteria	Coriobacteriia	OPB41	#N/A	#N/A	#N/A
JF719329.1.1360	B583_Polaromonas	19	0.000728103	0	0.0970448	Oligo	Peripheral	Bacteria	Proteobacteria	Gammaproteobacteria	Betaproteobacteriales	Burkholderiaceae	Polaromonas	#N/A
JF733414.1.1516	B615_Desulfomonile	19	0.000509964	0.33241	-0.238973	Oligo	Peripheral	Bacteria	Proteobacteria	Deltaproteobacteria	Syntrophobacterales	Syntrophaceae	Desulfomonile	#N/A
JN559151.1.1485	B6070_f_Microscillaceae	19	0.000435013	0.465374	-0.490986	Oligo	Peripheral	Bacteria	Bacteroidetes	Bacteroidia	Cytophagales	Microscillaceae	#N/A	#N/A
KF515271.1.1488	B365_o_uncultured	19	0.00107186	0	0.0970448	Oligo	Peripheral	Bacteria	Nitrospirae	Thermodesulfovibrionia	uncultured	#N/A	#N/A	#N/A
b3ecea3bdb521403649c076312b5ff1a	F2219_o_NA	19	0.00100256	0.099723	0.0130404	Oligo	Peripheral	Fungi	#N/A	#N/A	#N/A	#N/A	#N/A	#N/A
f6b0250b9ca76ae4c07374386e826d4c	F747_unidentified	19	0.000763562	0	0.0970448	Oligo	Peripheral	Fungi	unidentified	unidentified	unidentified	unidentified	unidentified	unidentified
184fb11e2c965f36fc7395f9ecfa3d95	B524_o_RBG-13-54-9	18	1.13729e-07	0	-0.38766	Oligo	Peripheral	Bacteria	Chloroflexi	Anaerolineae	RBG-13-54-9	#N/A	#N/A	#N/A
4c959e141a172560b1448e528fb7675b	B1376_uncultured soil bacterium	18	0.000234347	0	0.0130404	Oligo	Peripheral	Bacteria	Chloroflexi	Chloroflexia	Thermomicrobiales	JG30-KF-CM45	uncultured soil bacterium	uncultured soil bacterium
AB252884.1.1503	B1886_o_JG36-GS-52	18	2.82398e-05	0.444444	-0.490986	Oligo	Peripheral	Bacteria	Proteobacteria	Gammaproteobacteria	JG36-GS-52	#N/A	#N/A	#N/A
AM157317.1.1235	B2916_uncultured bacterium	18	0.00131881	0	0.0130404	Oligo	Peripheral	Bacteria	Proteobacteria	Deltaproteobacteria	Myxococcales	Blfdi19	uncultured bacterium	uncultured bacterium
EF019530.1.1410	B1328_uncultured	18	0.00032557	0.277778	-0.238973	Oligo	Peripheral	Bacteria	Proteobacteria	Deltaproteobacteria	Desulfarculales	Desulfarculaceae	uncultured	metagenome
EU542525.1.1421	B194_uncultured	18	0.000502626	0.197531	-0.154968	Oligo	Peripheral	Bacteria	Chloroflexi	Anaerolineae	Anaerolineales	Anaerolineaceae	uncultured	#N/A
EU937873.1.1500	B6111_Haliangium	18	7.14588e-05	0.104938	-0.070964	Oligo	Peripheral	Bacteria	Proteobacteria	Deltaproteobacteria	Myxococcales	Haliangiaceae	Haliangium	uncultured sludge bacterium A9
GQ487969.1.1565	B1355_f_Ruminococcaceae	18	0.000483523	0.104938	-0.070964	Oligo	Peripheral	Bacteria	Firmicutes	Clostridia	Clostridiales	Ruminococcaceae	#N/A	#N/A
JX224021.1.1356	B307_Geobacter	18	0.0017779	0.197531	-0.154968	Oligo	Peripheral	Bacteria	Proteobacteria	Deltaproteobacteria	Desulfuromonadales	Geobacteraceae	Geobacter	uncultured Desulfuromonadales bacterium
JX225800.1.1208	B7939_[Desulfobacterium] catecholicum group	18	2.73972e-08	0.197531	-0.588996	Oligo	Peripheral	Bacteria	Proteobacteria	Deltaproteobacteria	Desulfobacterales	Desulfobulbaceae	[Desulfobacterium] catecholicum group	#N/A
KJ878613.1.1375	B1980_Cellulomonas	18	0.000366715	0.104938	-0.070964	Oligo	Peripheral	Bacteria	Actinobacteria	Actinobacteria	Micrococcales	Cellulomonadaceae	Cellulomonas	#N/A
031c2735b1e332244f83bf3b85704038	F1830_unidentified	18	0.00229173	0.104938	-0.070964	Oligo	Peripheral	Fungi	Rozellomycota	unidentified	unidentified	unidentified	unidentified	unidentified
97606b52b39823f2420a87dab8eb3400	F3179_o_NA	18	0.000605208	0	0.0130404	Oligo	Peripheral	Fungi	#N/A	#N/A	#N/A	#N/A	#N/A	#N/A
b03785042177e9fbae76b87e41fbb045	F1249_unidentified	18	0.00271866	0.277778	-0.238973	Oligo	Peripheral	Fungi	unidentified	unidentified	unidentified	unidentified	unidentified	unidentified
d81b751a33e0942767eedfc433a0c925	F2968_unidentified	18	5.04726e-05	0	0.0130404	Oligo	Peripheral	Fungi	unidentified	unidentified	unidentified	unidentified	unidentified	unidentified
SH209733.07FU_EU826928_reps	F811_unidentified	18	0.000449697	0	0.0130404	Oligo	Peripheral	Fungi	Ascomycota	Sordariomycetes	Sordariales	unidentified	unidentified	unidentified
AB240345.1.1468	B205_uncultured	17	0.000570222	0	-0.070964	Oligo	Peripheral	Bacteria	Chloroflexi	Anaerolineae	Anaerolineales	Anaerolineaceae	uncultured	#N/A
c8f6d8733db2af40f6a62ff7d9d55229	B8057_Haliangium	17	3.93923e-05	0.214533	-0.238973	Oligo	Peripheral	Bacteria	Proteobacteria	Deltaproteobacteria	Myxococcales	Haliangiaceae	Haliangium	uncultured Kofleriaceae bacterium
FJ755761.1.1520	B417_o_NA	17	0.000220223	0	-0.070964	Oligo	Peripheral	Bacteria	Nitrospirae	4-29-1	#N/A	#N/A	#N/A	#N/A
GU127778.1.1489	B1829_o_NA	17	0.0022981	0.110727	-0.154968	Oligo	Peripheral	Bacteria	Nitrospirae	4-29-1	#N/A	#N/A	#N/A	#N/A
HM445386.1.1300	B1026_Armatimonadetes bacterium 55-13	17	0.000355081	0.110727	-0.154968	Oligo	Peripheral	Bacteria	Armatimonadetes	Fimbriimonadia	Fimbriimonadales	Fimbriimonadaceae	Armatimonadetes bacterium 55-13	Armatimonadetes bacterium 55-13
JQ684320.1.1266	B68_Noviherbaspirillum	17	0.00186258	0	-0.070964	Oligo	Peripheral	Bacteria	Proteobacteria	Gammaproteobacteria	Betaproteobacteriales	Burkholderiaceae	Noviherbaspirillum	#N/A
JX504948.1.1479	B388_Anaeromyxobacter	17	0.000804435	0	-0.070964	Oligo	Peripheral	Bacteria	Proteobacteria	Deltaproteobacteria	Myxococcales	Archangiaceae	Anaeromyxobacter	uncultured Anaeromyxobacter sp.
KF956788.1.1470	B533_f_uncultured	17	0.0002608	0.110727	-0.154968	Oligo	Peripheral	Bacteria	Actinobacteria	Thermoleophilia	Gaiellales	uncultured	#N/A	#N/A
KJ782237.1.1528	B809_o_NA	17	0.000306675	0	-0.070964	Oligo	Peripheral	Bacteria	Proteobacteria	Deltaproteobacteria	#N/A	#N/A	#N/A	#N/A
07dda974f129029c650e34eaeb467fae	F757_o_NA	17	0.000579287	0	-0.070964	Oligo	Peripheral	Fungi	#N/A	#N/A	#N/A	#N/A	#N/A	#N/A
3ddc02214b1000fcf673a206884ad090	F1289_Blastobotrys	17	0.000173193	0.214533	-0.238973	Oligo	Peripheral	Fungi	Ascomycota	Saccharomycetes	Saccharomycetales	Trichomonascaceae	Blastobotrys	#N/A
b1157325ede13c7438ef27b9da04760a	F1334_unidentified	17	0.000375948	0	-0.070964	Oligo	Peripheral	Fungi	unidentified	unidentified	unidentified	unidentified	unidentified	unidentified
b73bd420bf4c65146d3f4c5f0e292481	F484_Mortierella	17	0.000531501	0	-0.070964	Oligo	Peripheral	Fungi	Mortierellomycota	Mortierellomycetes	Mortierellales	Mortierellaceae	Mortierella	unidentified
9096d22cf44c6fc9541473b38b48b6c5	B200_o_Sva0485	16	0.000918065	0	-0.154968	Oligo	Peripheral	Bacteria	Proteobacteria	Deltaproteobacteria	Sva0485	#N/A	#N/A	#N/A
a6891605757284abbb6e0e590f496ea4	B4213_o_NA	16	0.000468981	0.226562	-0.322977	Oligo	Peripheral	Bacteria	Latescibacteria	#N/A	#N/A	#N/A	#N/A	#N/A
AB240231.1.1447	B22_uncultured bacterium	16	0.000175682	0	-0.154968	Oligo	Peripheral	Bacteria	Chloroflexi	OLB14	uncultured bacterium	uncultured bacterium	uncultured bacterium	uncultured bacterium
AM086112.1.1468	B275_uncultured	16	0.00147705	0	-0.154968	Oligo	Peripheral	Bacteria	Proteobacteria	Deltaproteobacteria	Syntrophobacterales	Syntrophobacteraceae	uncultured	uncultured proteobacterium
EF018246.1.1399	B263_uncultured	16	0.000552788	0.226562	-0.322977	Oligo	Peripheral	Bacteria	Gemmatimonadetes	Gemmatimonadetes	Gemmatimonadales	Gemmatimonadaceae	uncultured	#N/A
EF020015.1.1359	B1322_uncultured	16	1.61986e-08	0	-0.451839	Oligo	Peripheral	Bacteria	Chloroflexi	Anaerolineae	Anaerolineales	Anaerolineaceae	uncultured	uncultured Bellilinea sp.
EU135135.1.1351	B3277_uncultured	16	0.000392966	0.5	-0.827004	Oligo	Peripheral	Bacteria	Planctomycetes	Planctomycetacia	Pirellulales	Pirellulaceae	uncultured	uncultured soil bacterium
GQ500708.1.1528	B5440_Desulfatiglans	16	0	0.21875	-0.645938	Oligo	Peripheral	Bacteria	Proteobacteria	Deltaproteobacteria	Desulfarculales	Desulfarculaceae	Desulfatiglans	uncultured soil bacterium
JF198868.1.1366	B333_Arenimonas	16	0.000741269	0	-0.154968	Oligo	Peripheral	Bacteria	Proteobacteria	Gammaproteobacteria	Xanthomonadales	Xanthomonadaceae	Arenimonas	#N/A
KJ192002.1.1494	B246_uncultured Rhodocyclaceae bacterium	16	0.00050496	0	-0.154968	Oligo	Peripheral	Bacteria	Proteobacteria	Gammaproteobacteria	Betaproteobacteriales	A21b	uncultured Rhodocyclaceae bacterium	uncultured Rhodocyclaceae bacterium
LC124602.1.1421	B566_uncultured Caldilineae bacterium	16	0.000373435	0	-0.154968	Oligo	Peripheral	Bacteria	Chloroflexi	Anaerolineae	RBG-13-54-9	uncultured Caldilineae bacterium	uncultured Caldilineae bacterium	uncultured Caldilineae bacterium
2c3cb34f4d79c7a9164bc7bb582ba3a2	B592_uncultured bacterium	15	0.000210195	0	-0.238973	Oligo	Peripheral	Bacteria	Chloroflexi	Anaerolineae	SBR1031	uncultured bacterium	uncultured bacterium	uncultured bacterium
AB672246.1.1441	B1465_uncultured bacterium	15	0.000152852	0	-0.238973	Oligo	Peripheral	Bacteria	Acidobacteria	Acidobacteriia	Subgroup 12	uncultured bacterium	uncultured bacterium	uncultured bacterium
ATTT01000037.173.1685	B545_beta proteobacterium JGI 0001003-N18	15	0.000404689	0	-0.238973	Oligo	Peripheral	Bacteria	Proteobacteria	Gammaproteobacteria	Betaproteobacteriales	SC-I-84	beta proteobacterium JGI 0001003-N18	beta proteobacterium JGI 0001003-N18
FPLS01060588.1.1449	B1129_metagenome	15	0	0	-0.4826	Oligo	Peripheral	Bacteria	Acidobacteria	Subgroup 17	metagenome	metagenome	metagenome	metagenome
GQ339156.1.1479	B889_uncultured bacterium	15	4.72895e-05	0.124444	-0.322977	Oligo	Peripheral	Bacteria	Fibrobacteres	Chitinivibrionia	uncultured	uncultured bacterium	uncultured bacterium	uncultured bacterium
HM062181.1.1473	B2603_uncultivated soil bacterium clone C112	15	1.5184e-05	0	-0.238973	Oligo	Peripheral	Bacteria	Acidobacteria	Subgroup 6	uncultivated soil bacterium clone C112	uncultivated soil bacterium clone C112	uncultivated soil bacterium clone C112	uncultivated soil bacterium clone C112
JF169102.1.1345	B2503_f_Ruminococcaceae	15	0.000345434	0.231111	-0.406982	Oligo	Peripheral	Bacteria	Firmicutes	Clostridia	Clostridiales	Ruminococcaceae	#N/A	#N/A
JN868965.1.1488	B4089_Dongia	15	0.000196008	0.124444	-0.322977	Oligo	Peripheral	Bacteria	Proteobacteria	Alphaproteobacteria	Dongiales	Dongiaceae	Dongia	uncultured Acetobacteraceae bacterium
2917df7977eee8b91945fc21cddc9cee	F2269_unidentified	15	0.000579907	0	-0.238973	Oligo	Peripheral	Fungi	unidentified	unidentified	unidentified	unidentified	unidentified	unidentified
71b67792a9406443a1d8a64f26514911	F1418_o_NA	15	3.29863e-05	0	-0.238973	Oligo	Peripheral	Fungi	#N/A	#N/A	#N/A	#N/A	#N/A	#N/A
d83be887eb24c73272bf44854b0d8cf0	F1427_o_NA	15	0.00128353	0.32	-0.490986	Oligo	Peripheral	Fungi	#N/A	#N/A	#N/A	#N/A	#N/A	#N/A
f5d10fffcee9a50ef983b03bb17307fc	F382_o_NA	15	0.00141762	0	-0.238973	Oligo	Peripheral	Fungi	#N/A	#N/A	#N/A	#N/A	#N/A	#N/A
70f3fac8a4df9701c7aa9c7df8c1b006	B3183_Oscillochloris	14	0.000640974	1.11022e-16	-0.322977	Oligo	Peripheral	Bacteria	Chloroflexi	Chloroflexia	Chloroflexales	Chloroflexaceae	Oscillochloris	#N/A
79b8df7a214f8989a7c2164a8ddbe11d	B5757_o_NA	14	2.7147e-08	1.11022e-16	-0.516018	Oligo	Peripheral	Bacteria	#N/A	#N/A	#N/A	#N/A	#N/A	#N/A
AB179503.1.1499	B1192_Polycyclovorans	14	0.000146084	0.132653	-0.406982	Oligo	Peripheral	Bacteria	Proteobacteria	Gammaproteobacteria	Salinisphaerales	Solimonadaceae	Polycyclovorans	uncultured bacterium
d6ef8f680a092f0fcca4e2964140c204	B3269_uncultured Caldilineaceae bacterium	14	0.000228082	1.11022e-16	-0.322977	Oligo	Peripheral	Bacteria	Chloroflexi	Anaerolineae	RBG-13-54-9	uncultured Caldilineaceae bacterium	uncultured Caldilineaceae bacterium	uncultured Caldilineaceae bacterium
GQ487974.1.1501	B1340_uncultured bacterium	14	6.20957e-09	0.132653	-0.674409	Oligo	Peripheral	Bacteria	Proteobacteria	Gammaproteobacteria	Betaproteobacteriales	Methylophilaceae	uncultured bacterium	uncultured bacterium
HJ352574.1.1386	B8109_uncultured	14	3.82837e-06	1.11022e-16	-0.322977	Oligo	Peripheral	Bacteria	Proteobacteria	Alphaproteobacteria	Acetobacterales	Acetobacteraceae	uncultured	unidentified
HM243826.1.1468	B1730_uncultured	14	0.000300054	0.244898	-0.490986	Oligo	Peripheral	Bacteria	Chloroflexi	Anaerolineae	Anaerolineales	Anaerolineaceae	uncultured	#N/A
JF266320.1.1358	B2063_uncultured Nitrosomonadaceae bacterium	14	1.84137e-06	1.11022e-16	-0.517888	Oligo	Peripheral	Bacteria	Proteobacteria	Gammaproteobacteria	Betaproteobacteriales	TRA3-20	uncultured Nitrosomonadaceae bacterium	uncultured Nitrosomonadaceae bacterium
JF266414.1.1376	B717_uncultured Acidobacteriales bacterium	14	0.000384281	1.11022e-16	-0.322977	Oligo	Peripheral	Bacteria	Acidobacteria	Blastocatellia (Subgroup 4)	11-24	uncultured Acidobacteriales bacterium	uncultured Acidobacteriales bacterium	uncultured Acidobacteriales bacterium
JF733443.1.1444	B944_Rhodomicrobium	14	4.96037e-05	1.11022e-16	-0.322977	Oligo	Peripheral	Bacteria	Proteobacteria	Alphaproteobacteria	Rhizobiales	Rhodomicrobiaceae	Rhodomicrobium	uncultured Rhodomicrobium sp.
JN825519.1.1434	B2279_hydrothermal vent metagenome	14	1.61986e-08	1.11022e-16	-0.516018	Oligo	Peripheral	Bacteria	Proteobacteria	Deltaproteobacteria	RCP2-54	hydrothermal vent metagenome	hydrothermal vent metagenome	hydrothermal vent metagenome
JX079302.1.1280	B1673_uncultured	14	3.04679e-05	0.132653	-0.406982	Oligo	Peripheral	Bacteria	Chloroflexi	Anaerolineae	Caldilineales	Caldilineaceae	uncultured	uncultured soil bacterium
KJ568483.1.1487	B2960_uncultured	14	3.70644e-05	1.11022e-16	-0.322977	Oligo	Peripheral	Bacteria	Gemmatimonadetes	Gemmatimonadetes	Gemmatimonadales	Gemmatimonadaceae	uncultured	Gemmatimonadetes bacterium SCN 70-22
2265f60dd986321ad5378a5a359653a0	F2563_o_NA	14	0.000270059	1.11022e-16	-0.322977	Oligo	Peripheral	Fungi	#N/A	#N/A	#N/A	#N/A	#N/A	#N/A
b37a0eefd5e7abbc1580b8bb802b0161	F1154_unidentified	14	0.000718589	1.11022e-16	-0.322977	Oligo	Peripheral	Fungi	unidentified	unidentified	unidentified	unidentified	unidentified	unidentified
d794f19fb10434ccd0cd55f784cd78b4	F3580_unidentified	14	1.35189e-05	1.11022e-16	-0.322977	Oligo	Peripheral	Fungi	unidentified	unidentified	unidentified	unidentified	unidentified	unidentified
51562948f8b8093db2afdf16f1018978	B1635_uncultured bacterium	13	2.53683e-05	0	-0.406982	Oligo	Peripheral	Bacteria	Omnitrophicaeota	uncultured bacterium	uncultured bacterium	uncultured bacterium	uncultured bacterium	uncultured bacterium
EF020034.1.1372	B783_Gemmatimonas	13	0.000638805	0	-0.406982	Oligo	Peripheral	Bacteria	Gemmatimonadetes	Gemmatimonadetes	Gemmatimonadales	Gemmatimonadaceae	Gemmatimonas	bacterium enrichment culture clone auto9_4W
EU135562.1.1287	B3988_uncultured bacterium mle1-16	13	3.91893e-08	0.142012	-0.553273	Oligo	Peripheral	Bacteria	Latescibacteria	uncultured bacterium mle1-16	uncultured bacterium mle1-16	uncultured bacterium mle1-16	uncultured bacterium mle1-16	uncultured bacterium mle1-16
EU431712.1.1474	B2867_Bdellovibrio	13	0	0.142012	-0.490986	Oligo	Peripheral	Bacteria	Proteobacteria	Deltaproteobacteria	Bdellovibrionales	Bdellovibrionaceae	Bdellovibrio	Bdellovibrio exovorus JSS
[truncated: 430 more rows]

## Sheet: Nutrient-poor_CJ2_fer
OTU	OTU_id	Degree	Betweenness	Pi	zi	category	Role	Kingdom	Phylum	Class	Order	Family	Genus	Species
JX505016.1.1422	B35_uncultured Anaerolineaceae bacterium	43	0.00388189	0.633856	-0.257394	#N/A	Connector	Bacteria	Chloroflexi	KD4-96	uncultured Anaerolineaceae bacterium	uncultured Anaerolineaceae bacterium	uncultured Anaerolineaceae bacterium	uncultured Anaerolineaceae bacterium
FPLM01000410.1.1347	B447_wastewater metagenome	33	0.00405096	0.66483	-0.462772	#N/A	Connector	Bacteria	Chloroflexi	Anaerolineae	SBR1031	A4b	wastewater metagenome	wastewater metagenome
AM292608.1.1251	B1114_Clostridium sensu stricto 9	23	0.00384825	0.657845	-0.575564	#N/A	Connector	Bacteria	Firmicutes	Clostridia	Clostridiales	Clostridiaceae 1	Clostridium sensu stricto 9	uncultured Clostridium sp.
EF018571.1.1355	B929_uncultured Chloroflexi bacterium	17	0.000982555	0.657439	-0.688355	#N/A	Connector	Bacteria	Chloroflexi	Ktedonobacteria	C0119	uncultured Chloroflexi bacterium	uncultured Chloroflexi bacterium	uncultured Chloroflexi bacterium
AY947996.1.1387	B1378_Rhodobacter	16	0.000836915	0.695312	-0.909023	#N/A	Connector	Bacteria	Proteobacteria	Alphaproteobacteria	Rhodobacterales	Rhodobacteraceae	Rhodobacter	Rhodobacter sp. 7B-409
CU922866.1.1374	B64_uncultured bacterium 213	16	0.00395495	0.664062	-0.688355	#N/A	Connector	Bacteria	Acidobacteria	Subgroup 6	uncultured bacterium 213	uncultured bacterium 213	uncultured bacterium 213	uncultured bacterium 213
9545315ca67657fcfa65051f21e321dc	B406_uncultured prokaryote	14	0.00060684	0.704082	-0.909023	#N/A	Connector	Bacteria	Acidobacteria	Aminicenantia	Aminicenantales	uncultured prokaryote	uncultured prokaryote	uncultured prokaryote
749eec346a718cbefdabb589989dfd12	F938_unidentified	12	0.000653031	0.625	-0.691756	#N/A	Connector	Fungi	Rozellomycota	unidentified	unidentified	unidentified	unidentified	unidentified
8236dc239cda04dcfeea3624f1b4b75c	B2041_Paludibaculum	8	0.000654772	0.625	-0.801146	#N/A	Connector	Bacteria	Acidobacteria	Acidobacteriia	Solibacterales	Solibacteraceae (Subgroup 3)	Paludibaculum	#N/A
70c8a4bbb07f0b5bc3c172ca511b5325	F1674_o_NA	7	0.000347586	0.693878	-0.691756	#N/A	Connector	Fungi	Basidiomycota	#N/A	#N/A	#N/A	#N/A	#N/A
489c18b30e843795eb175014f760fc71	F5301_unidentified	4	0	0.625	-0.843749	#N/A	Connector	Fungi	unidentified	unidentified	unidentified	unidentified	unidentified	unidentified
6d70e7ba71b0e8012d5b7cac4d168183	F925_o_NA	4	0	0.625	-0.843749	#N/A	Connector	Fungi	#N/A	#N/A	#N/A	#N/A	#N/A	#N/A
366e214b59b032147bfdd2d5f29e8b35	B10610_uncultured	3	0	0.666667	-0.886535	#N/A	Connector	Bacteria	Chloroflexi	Anaerolineae	Anaerolineales	Anaerolineaceae	uncultured	#N/A
EF516175.1.1456	B111_uncultured delta proteobacterium	56	0.00720779	0.658801	-0.298121	Oligo	Connector	Bacteria	Proteobacteria	Gammaproteobacteria	Betaproteobacteriales	A21b	uncultured delta proteobacterium	uncultured delta proteobacterium
f8a69675ac0cb0685e58e3db0fbca647	F128_o_NA	55	0.00477656	0.680331	-0.250316	Oligo	Connector	Fungi	#N/A	#N/A	#N/A	#N/A	#N/A	#N/A
626f39fca000a64bb62ac8f64c50fbea	F677_Kurtzmanomyces	24	0.00119406	0.663194	-0.613161	Oligo	Connector	Fungi	Basidiomycota	Agaricostilbomycetes	Agaricostilbales	Chionosphaeraceae	Kurtzmanomyces	unidentified
JF719329.1.1360	B583_Polaromonas	17	0.00231986	0.650519	-0.439505	Oligo	Connector	Bacteria	Proteobacteria	Gammaproteobacteria	Betaproteobacteriales	Burkholderiaceae	Polaromonas	#N/A
EU134197.1.1315	B60_uncultured bacterium	4	0	0.625	-0.843749	Oligo	Connector	Bacteria	Chloroflexi	KD4-96	uncultured bacterium	uncultured bacterium	uncultured bacterium	uncultured bacterium
EF019065.1.1384	B300_mle1-7	42	0.00563408	0.647392	-0.360658	Copio	Connector	Bacteria	Proteobacteria	Gammaproteobacteria	Betaproteobacteriales	Nitrosomonadaceae	mle1-7	uncultured Rhodocyclaceae bacterium
a421cbf27bf3b68b9654ee5eb9dd7a55	B707_f_BIrii41	12	0.000674101	0.625	-0.565631	Copio	Connector	Bacteria	Proteobacteria	Deltaproteobacteria	Myxococcales	BIrii41	#N/A	#N/A
443bb1d252f9a9492309b6c7cc7f8bb7	B1251_f_SG8-4	5	0	0.64	-0.843749	Copio	Connector	Bacteria	Planctomycetes	Phycisphaerae	MSBL9	SG8-4	#N/A	#N/A
AB238766.1.1444	B313_uncultured bacterium	158	0.0208013	0.248758	4.19926	#N/A	Module hub	Bacteria	Nitrospirae	Thermodesulfovibrionia	uncultured	uncultured bacterium	uncultured bacterium	uncultured bacterium
e3702acbb12516981749077eb0e4a33d	F13_Schizothecium	139	0.0143154	0.169556	3.86088	#N/A	Module hub	Fungi	Ascomycota	Sordariomycetes	Sordariales	Lasiosphaeriaceae	Schizothecium	Schizothecium_glutinans
SH203624.07FU_KF673598_reps	F32_Dimorphospora	138	0.0116177	0.316425	3.1829	#N/A	Module hub	Fungi	Ascomycota	Leotiomycetes	Helotiales	Helotiaceae	Dimorphospora	unidentified
LC124606.1.1478	B92_uncultured Acidobacteriales bacterium	135	0.0247635	0.213224	3.71485	#N/A	Module hub	Bacteria	Acidobacteria	Holophagae	Subgroup 7	uncultured Acidobacteriales bacterium	uncultured Acidobacteriales bacterium	uncultured Acidobacteriales bacterium
b24dcb12d51d590a0f83b15ba55a008c	B223_uncultured proteobacterium	133	0.0259596	0.224772	3.59605	#N/A	Module hub	Bacteria	Nitrospirae	4-29-1	uncultured proteobacterium	uncultured proteobacterium	uncultured proteobacterium	uncultured proteobacterium
DQ138957.1.1512	B53_Geobacter	131	0.0220173	0.318979	3.6823	#N/A	Module hub	Bacteria	Proteobacteria	Deltaproteobacteria	Desulfuromonadales	Geobacteraceae	Geobacter	#N/A
HQ118941.1.1519	B179_Haliangium	128	0.0217494	0.200684	3.51685	#N/A	Module hub	Bacteria	Proteobacteria	Deltaproteobacteria	Myxococcales	Haliangiaceae	Haliangium	#N/A
EU155988.1.1055	A144_Methanobacterium	121	0.00285588	0.137696	3.33453	#N/A	Module hub	Archaea	Euryarchaeota	Methanobacteria	Methanobacteriales	Methanobacteriaceae	Methanobacterium	#N/A
e22827628c1ec69915f2d2aa63c65d9b	F1008_o_NA	119	0.0344499	0.110727	6.1821	#N/A	Module hub	Fungi	#N/A	#N/A	#N/A	#N/A	#N/A	#N/A
EF018409.1.1451	B120_uncultured Burkholderiaceae bacterium	119	0.00732361	0.279641	2.96003	#N/A	Module hub	Bacteria	Proteobacteria	Gammaproteobacteria	Betaproteobacteriales	SC-I-84	uncultured Burkholderiaceae bacterium	uncultured Burkholderiaceae bacterium
JX504897.1.1429	B160_uncultured	111	0.019243	0.369451	2.80997	#N/A	Module hub	Bacteria	Chloroflexi	Anaerolineae	Anaerolineales	Anaerolineaceae	uncultured	uncultured Bellilinea sp.
7a772c20c0208dcd2219d867527d385e	A79_uncultured marine crenarchaeote E6-3G	110	0.00141932	0.0867769	3.07135	#N/A	Module hub	Archaea	Crenarchaeota	Bathyarchaeia	uncultured marine crenarchaeote E6-3G	uncultured marine crenarchaeote E6-3G	uncultured marine crenarchaeote E6-3G	uncultured marine crenarchaeote E6-3G
GU127795.1.1427	B239_f_uncultured	108	0.00380016	0.252401	2.67494	#N/A	Module hub	Bacteria	Acidobacteria	Acidobacteriia	Acidobacteriales	uncultured	#N/A	#N/A
8956d8cc5a4d41c3974d38dae7052326	F242_o_NA	104	0.00708306	0.0926405	3.03741	#N/A	Module hub	Fungi	Basidiomycota	Microbotryomycetes	#N/A	#N/A	#N/A	#N/A
3373c1399bcb3214acc64bf855283fb0	F511_o_NA	102	0.00311185	0.0194156	3.12236	#N/A	Module hub	Fungi	#N/A	#N/A	#N/A	#N/A	#N/A	#N/A
SH529770.07FU_JX337833_reps	F12_Pseudeurotium	101	0.00785893	1.11022e-16	3.12236	#N/A	Module hub	Fungi	Ascomycota	Leotiomycetes	Thelebolales	Pseudeurotiaceae	Pseudeurotium	unidentified
SH198128.07FU_JN033419_reps	F221_Cistella	100	0.0112714	0.0392	5.29922	#N/A	Module hub	Fungi	Ascomycota	Leotiomycetes	Helotiales	Hyaloscyphaceae	Cistella	#N/A
9e3f55b992165b5ffd4a23dc793b589f	F127_Oberwinklerozyma	99	0.00207913	0.019998	2.99493	#N/A	Module hub	Fungi	Basidiomycota	Microbotryomycetes	Microbotryomycetes_ord_Incertae_sedis	Chrysozymaceae	Oberwinklerozyma	Oberwinklerozyma_silvestris
b5bf7c229b01840e12d5175d5552cdf9	F18_Schizothecium	98	0.00401984	0.0593503	2.8675	#N/A	Module hub	Fungi	Ascomycota	Sordariomycetes	Sordariales	Lasiosphaeriaceae	Schizothecium	Schizothecium_glutinans
JN649134.1.1045	A51_Methanosaeta	98	0.00223995	0.0783007	2.72485	#N/A	Module hub	Archaea	Euryarchaeota	Methanomicrobia	Methanosarcinales	Methanosaetaceae	Methanosaeta	#N/A
AB236060.1.1331	A385_Methanobacterium	95	0.00128563	0.099723	2.50739	#N/A	Module hub	Archaea	Euryarchaeota	Methanobacteria	Methanobacteriales	Methanobacteriaceae	Methanobacterium	Methanobacterium palustre
SH219102.07FU_EU364859_reps	F23_f_Nectriaceae	88	0.0010125	0	2.57017	#N/A	Module hub	Fungi	Ascomycota	Sordariomycetes	Hypocreales	Nectriaceae	#N/A	#N/A
d1a735cd0635b3274071fba7cb6bf49a	F721_o_NA	87	0.00102871	0	2.5277	#N/A	Module hub	Fungi	#N/A	#N/A	#N/A	#N/A	#N/A	#N/A
KX463112.1.930	A32_o_NA	78	0.00985207	0.0499671	3.91183	#N/A	Module hub	Archaea	Crenarchaeota	Bathyarchaeia	#N/A	#N/A	#N/A	#N/A
2e8bc1b5e749a2f0ec6111c0385ab6f5	F40_o_NA	75	0.0174357	0.100978	3.59652	#N/A	Module hub	Fungi	#N/A	#N/A	#N/A	#N/A	#N/A	#N/A
01fad4a76d480e9b2b9dd9cf8a81f07d	F1323_o_Helotiales	74	0.00429836	0.0525931	3.65958	#N/A	Module hub	Fungi	Ascomycota	Leotiomycetes	Helotiales	#N/A	#N/A	#N/A
FJ685724.1.1370	A132_Methanosarcina	74	0.00775425	0.0529584	3.65958	#N/A	Module hub	Archaea	Euryarchaeota	Methanomicrobia	Methanosarcinales	Methanosarcinaceae	Methanosarcina	#N/A
AY963495.1.1421	B1081_Candidatus Solibacter	56	0.000485284	1.11022e-16	2.65058	#N/A	Module hub	Bacteria	Acidobacteria	Acidobacteriia	Solibacterales	Solibacteraceae (Subgroup 3)	Candidatus Solibacter	#N/A
HM243932.1.1382	B1275_ADurb.Bin063-1	56	0.00269965	0.0350765	2.58751	#N/A	Module hub	Bacteria	Verrucomicrobia	Verrucomicrobiae	Pedosphaerales	Pedosphaeraceae	ADurb.Bin063-1	uncultured subdivision 3 bacterium
AB240237.1.1458	B88_o_NA	163	0.0223349	0.30035	4.12406	Oligo	Module hub	Bacteria	Chloroflexi	JG30-KF-CM66	#N/A	#N/A	#N/A	#N/A
JX505138.1.1478	B17_uncultured Thermaerobacter sp.	155	0.0207887	0.316337	3.6573	Oligo	Module hub	Bacteria	Acidobacteria	Holophagae	Subgroup 7	uncultured Thermaerobacter sp.	uncultured Thermaerobacter sp.	uncultured Thermaerobacter sp.
aaeca2b7bfc713fdf91baef469faf1fd	B161_o_NA	146	0.018977	0.404673	2.96395	Oligo	Module hub	Bacteria	Acidobacteria	Subgroup 6	#N/A	#N/A	#N/A	#N/A
c152aa236177df11b68e9500631baf19	F402_o_NA	146	0.0131361	0.255207	3.62081	Oligo	Module hub	Fungi	#N/A	#N/A	#N/A	#N/A	#N/A	#N/A
KY121987.1.1436	B805_Rhodoblastus	146	0.00661049	0.0912929	4.34965	Oligo	Module hub	Bacteria	Proteobacteria	Alphaproteobacteria	Rhizobiales	Beijerinckiaceae	Rhodoblastus	Rhodoblastus sp.
KF515272.1.1522	B128_Syntrophorhabdus	135	0.00999763	0.32417	3.03694	Oligo	Module hub	Bacteria	Proteobacteria	Deltaproteobacteria	Deltaproteobacteria Incertae Sedis	Syntrophorhabdaceae	Syntrophorhabdus	uncultured Syntrophorhabdaceae bacterium
AB236063.1.1325	A17_Methanobacterium	123	0.00856247	0.296252	3.43477	Oligo	Module hub	Archaea	Euryarchaeota	Methanobacteria	Methanobacteriales	Methanobacteriaceae	Methanobacterium	Methanobacterium oryzae
1deffbe3ac4a1ac8a3fc666a886873bc	F214_o_NA	120	0.0105476	0.28875	2.96003	Oligo	Module hub	Fungi	#N/A	#N/A	#N/A	#N/A	#N/A	#N/A
EF019237.1.1345	B101_o_S085	118	0.00578797	0.221919	3.12294	Oligo	Module hub	Bacteria	Chloroflexi	Dehalococcoidia	S085	#N/A	#N/A	#N/A
DQ450808.1.1391	B14_uncultured Nitrospirae bacterium	115	0.00569224	0.264045	2.87857	Oligo	Module hub	Bacteria	Nitrospirae	4-29-1	uncultured Nitrospirae bacterium	uncultured Nitrospirae bacterium	uncultured Nitrospirae bacterium	uncultured Nitrospirae bacterium
SH190017.07FU_AF444350_refs	F3_Solicoccozyma	108	0.0037335	0.0365226	3.33474	Oligo	Module hub	Fungi	Basidiomycota	Tremellomycetes	Filobasidiales	Piskurozymaceae	Solicoccozyma	Solicoccozyma_terricola
SH202458.07FU_AF144483_refs	F10_Mrakia	105	0.00257165	0.0188662	3.24978	Oligo	Module hub	Fungi	Basidiomycota	Tremellomycetes	Cystofilobasidiales	Mrakiaceae	Mrakia	Mrakia_frigida
SH640256.07FU_KY102493_reps	F73_Cyberlindnera	105	0.00434685	0.037551	3.20731	Oligo	Module hub	Fungi	Ascomycota	Saccharomycetes	Saccharomycetales	Phaffomycetaceae	Cyberlindnera	unidentified
HM270072.1.1359	B973_Acidibacter	97	0.00461346	0.080136	2.78255	Oligo	Module hub	Bacteria	Proteobacteria	Gammaproteobacteria	Gammaproteobacteria Incertae Sedis	Unknown Family	Acidibacter	#N/A
SH195231.07FU_EF029232_reps	F71_Spirosphaera	97	0.00950033	0.080136	2.78255	Oligo	Module hub	Fungi	Ascomycota	Leotiomycetes	Helotiales	Helotiales_fam_Incertae_sedis	Spirosphaera	Spirosphaera_carici-graminis
0038cacd0d1f0afa1cd61a1c26e3408a	F301_o_NA	93	0.00124035	0	2.78255	Oligo	Module hub	Fungi	#N/A	#N/A	#N/A	#N/A	#N/A	#N/A
31aa93d6a5826cc0c7c0248a2a482fa7	F54_unidentified	87	0.00586978	0	2.5277	Oligo	Module hub	Fungi	unidentified	unidentified	unidentified	unidentified	unidentified	unidentified
HQ269186.1.966	A20_Rice Cluster I	76	0.00991162	0.0515928	3.78571	Oligo	Module hub	Archaea	Euryarchaeota	Methanomicrobia	Methanocellales	Methanocellaceae	Rice Cluster I	#N/A
EU155951.1.1441	A66_Methanosaeta	66	0.00462378	0.0587695	3.15508	Oligo	Module hub	Archaea	Euryarchaeota	Methanomicrobia	Methanosarcinales	Methanosaetaceae	Methanosaeta	uncultured archaeon
37a494b5e958048d317825c1f9364163	F197_o_NA	141	0.0176204	0.34113	3.90541	Copio	Module hub	Fungi	#N/A	#N/A	#N/A	#N/A	#N/A	#N/A
AY425764.1.1406	B116_Reyranella	137	0.0286222	0.332463	3.85676	Copio	Module hub	Bacteria	Proteobacteria	Alphaproteobacteria	Reyranellales	Reyranellaceae	Reyranella	#N/A
FPLP01002637.3.1464	B79_f_SC-I-84	125	0.010533	0.290048	2.99615	Copio	Module hub	Bacteria	Proteobacteria	Gammaproteobacteria	Betaproteobacteriales	SC-I-84	#N/A	#N/A
SH177546.07FU_EU826909_reps	F46_Arnium	121	0.00593571	0.079776	3.75949	Copio	Module hub	Fungi	Ascomycota	Sordariomycetes	Sordariales	Lasiosphaeriaceae	Arnium	unidentified
DQ836757.1.1415	B15_Thiobacillus	118	0.00777479	0.313847	2.79712	Copio	Module hub	Bacteria	Proteobacteria	Gammaproteobacteria	Betaproteobacteriales	Hydrogenophilaceae	Thiobacillus	#N/A
KC172206.1.1504	B8_Luteimonas	110	0.00469603	0.235537	2.79712	Copio	Module hub	Bacteria	Proteobacteria	Gammaproteobacteria	Xanthomonadales	Xanthomonadaceae	Luteimonas	#N/A
SH205049.07FU_AF444668_refs	F147_Papiliotrema	109	0.0103372	0.0875347	3.24978	Copio	Module hub	Fungi	Basidiomycota	Tremellomycetes	Tremellales	Rhynchogastremataceae	Papiliotrema	Papiliotrema_fuscus
477a05dcd01af0d718c3b9a30d89ed68	F39_Mrakiella	107	0.00588825	0.169447	2.95245	Copio	Module hub	Fungi	Basidiomycota	Tremellomycetes	Cystofilobasidiales	Cystofilobasidiales_fam_Incertae_sedis	Mrakiella	Mrakiella_aquatica
164c20da61b398e35f1bc62e7da8bea7	F90_unidentified	105	0.0113127	0.0373696	3.20731	Copio	Module hub	Fungi	unidentified	unidentified	unidentified	unidentified	unidentified	unidentified
SH212602.07FU_KT160857_reps	F7_Cladosporium	104	0.00436453	0.0190459	3.20731	Copio	Module hub	Fungi	Ascomycota	Dothideomycetes	Capnodiales	Cladosporiaceae	Cladosporium	Cladosporium_exasperatum
SH222252.07FU_AF314965_refs	F440_Bullera	102	0.00282411	0.0194156	3.12236	Copio	Module hub	Fungi	Basidiomycota	Tremellomycetes	Tremellales	Bulleraceae	Bullera	Bullera_variabilis
SH182979.07FU_AJ608969_reps	F48_unidentified	100	0.00792274	0.0768	2.90998	Copio	Module hub	Fungi	Ascomycota	Dothideomycetes	Pleosporales	Phaeosphaeriaceae	unidentified	unidentified
SH524769.07FU_JX365471_reps	F280_Cyphellophora	98	0.00375977	0	2.99493	Copio	Module hub	Fungi	Ascomycota	Eurotiomycetes	Chaetothyriales	Cyphellophoraceae	Cyphellophora	unidentified
SH530128.07FU_HG936987_reps	F14_Pyrenochaetopsis	98	0.033868	0.416701	3.47039	Copio	Module hub	Fungi	Ascomycota	Dothideomycetes	Pleosporales	Cucurbitariaceae	Pyrenochaetopsis	Pyrenochaetopsis_leptospora
SH215939.07FU_FN397280_reps	F6_Pseudeurotium	97	0.00482775	0.0603677	2.82503	Copio	Module hub	Fungi	Ascomycota	Leotiomycetes	Thelebolales	Pseudeurotiaceae	Pseudeurotium	unidentified
b54edf361f56b4ff37be51e947701abc	F626_unidentified	96	0.00145864	0	2.90998	Copio	Module hub	Fungi	Chytridiomycota	unidentified	unidentified	unidentified	unidentified	unidentified
2c9a20bb0e44497e8ff8d6382314c0ea	F51_o_Helotiales	94	0.020753	0.121548	4.66859	Copio	Module hub	Fungi	Ascomycota	Leotiomycetes	Helotiales	#N/A	#N/A	#N/A
KC925973.1.919	A25_uncultured methanogenic archaeon	94	0.022039	0.0617927	4.85778	Copio	Module hub	Archaea	Crenarchaeota	Bathyarchaeia	uncultured methanogenic archaeon	uncultured methanogenic archaeon	uncultured methanogenic archaeon	uncultured methanogenic archaeon
SH092425.07FU_JX496094_refs_sinGleTon	F92_Paraphaeosphaeria	93	0.00509583	0.0420858	2.6976	Copio	Module hub	Fungi	Ascomycota	Dothideomycetes	Pleosporales	Didymosphaeriaceae	Paraphaeosphaeria	Paraphaeosphaeria_arecacearum
SH182915.07FU_KF800272_reps	F38_Phaeosphaeria	92	0.00541446	0.0838847	2.57017	Copio	Module hub	Fungi	Ascomycota	Dothideomycetes	Pleosporales	Phaeosphaeriaceae	Phaeosphaeria	Phaeosphaeria_podocarpi
93bcbcb3aa34edbaa6d70e28bcb2253b	F150_Cyphellophora	91	0.00262266	0.0217365	2.65512	Copio	Module hub	Fungi	Ascomycota	Eurotiomycetes	Chaetothyriales	Cyphellophoraceae	Cyphellophora	unidentified
SH182912.07FU_KR056291_reps	F95_Phaeosphaeria	91	0.00536309	0.0852554	2.5277	Copio	Module hub	Fungi	Ascomycota	Dothideomycetes	Pleosporales	Phaeosphaeriaceae	Phaeosphaeria	Phaeosphaeria_podocarpi
469b30e83472448f751f273d20e32a27	F145_o_NA	89	0.0051529	0.0439338	2.5277	Copio	Module hub	Fungi	#N/A	#N/A	#N/A	#N/A	#N/A	#N/A
731a486f2644bca60259aa97fab3616d	F445_f_Psathyrellaceae	54	8.15453e-05	1.11022e-16	2.52445	Copio	Module hub	Fungi	Basidiomycota	Agaricomycetes	Agaricales	Psathyrellaceae	#N/A	#N/A
694952111dd71cc064804394bc9e0310	F8_unidentified	148	0.0206349	0.441654	-0.501755	#N/A	Peripheral	Fungi	unidentified	unidentified	unidentified	unidentified	unidentified	unidentified
6ed2fa6748dd899c395905936eb0cf8d	F439_o_NA	117	0.0155985	0.519541	0.701237	#N/A	Peripheral	Fungi	Basidiomycota	Microbotryomycetes	#N/A	#N/A	#N/A	#N/A
145390dbd3647a96d2b4970d78a7a7b5	F139_o_NA	110	0.0205446	0.497355	1.33837	#N/A	Peripheral	Fungi	#N/A	#N/A	#N/A	#N/A	#N/A	#N/A
2c1f6314840d1aac299694570bbd8825	F1185_o_NA	95	0.00390405	0.473795	0.106576	#N/A	Peripheral	Fungi	#N/A	#N/A	#N/A	#N/A	#N/A	#N/A
EU589292.1.1522	B501_uncultured Holophaga sp.	94	0.00577783	0.122001	2.48725	#N/A	Peripheral	Bacteria	Acidobacteria	Subgroup 6	uncultured Holophaga sp.	uncultured Holophaga sp.	uncultured Holophaga sp.	uncultured Holophaga sp.
919fb52cc5e30dbbfa01fc0ef41fbcce	F1729_o_NA	92	0.00115513	0.255435	1.94218	#N/A	Peripheral	Fungi	Ascomycota	#N/A	#N/A	#N/A	#N/A	#N/A
SH207979.07FU_AB540575_refs	F567_Acremonium	92	0.0113007	0.497401	0.446382	#N/A	Peripheral	Fungi	Ascomycota	Sordariomycetes	Hypocreales	Hypocreales_fam_Incertae_sedis	Acremonium	Acremonium_persicinum
EF516658.1.1502	B1279_ADurb.Bin063-1	91	0.00187047	0.274121	2.36514	#N/A	Peripheral	Bacteria	Verrucomicrobia	Verrucomicrobiae	Pedosphaerales	Pedosphaeraceae	ADurb.Bin063-1	#N/A
KP204870.1.1216	B7_f_Micrococcaceae	91	0.00583591	0.28982	1.98258	#N/A	Peripheral	Bacteria	Actinobacteria	Actinobacteria	Micrococcales	Micrococcaceae	#N/A	#N/A
4b5e6c45b749f1e3978c126f345b6237	A495_o_NA	89	0.00199734	0.276228	2.27957	#N/A	Peripheral	Archaea	Nanoarchaeaeota	Woesearchaeia	#N/A	#N/A	#N/A	#N/A
KF641385.1.936	A63_Methanosarcina	89	0.00331808	0.127004	2.35779	#N/A	Peripheral	Archaea	Euryarchaeota	Methanomicrobia	Methanosarcinales	Methanosarcinaceae	Methanosarcina	#N/A
FPLS01002185.10.1542	B1305_o_NA	88	0.00182633	0.313275	2.15121	#N/A	Peripheral	Bacteria	Acidobacteria	Subgroup 6	#N/A	#N/A	#N/A	#N/A
AB639295.1.973	A92_Methanomassiliicoccus	87	0.00105103	0.302021	2.15121	#N/A	Peripheral	Archaea	Euryarchaeota	Thermoplasmata	Methanomassiliicoccales	Methanomassiliicoccaceae	Methanomassiliicoccus	#N/A
a7abc6455e30bb74a43a7eaa646bf3fb	A454_uncultured euryarchaeote	86	0.00142855	0.0886966	2.20662	#N/A	Peripheral	Archaea	Nanoarchaeaeota	Woesearchaeia	uncultured euryarchaeote	uncultured euryarchaeote	uncultured euryarchaeote	uncultured euryarchaeote
GQ926277.1.916	A281_Methanocella	86	0.0031754	0.170633	2.46104	#N/A	Peripheral	Archaea	Euryarchaeota	Methanomicrobia	Methanocellales	Methanocellaceae	Methanocella	#N/A
88ecbf35a6eb4106af0fed7125b72703	F343_unidentified	84	0.00387099	0.0467687	2.31532	#N/A	Peripheral	Fungi	unidentified	unidentified	unidentified	unidentified	unidentified	unidentified
AB672187.1.1491	B175_ADurb.Bin063-1	83	0.0011987	0.134127	2.01863	#N/A	Peripheral	Bacteria	Verrucomicrobia	Verrucomicrobiae	Pedosphaerales	Pedosphaeraceae	ADurb.Bin063-1	#N/A
f0dbebed03503531004a66b3fc978fb2	F1065_Tetraplosphaeria	83	0.00121017	0.154449	2.37381	#N/A	Peripheral	Fungi	Ascomycota	Dothideomycetes	Pleosporales	Tetraplosphaeriaceae	Tetraplosphaeria	#N/A
DQ395943.1.1496	B210_Candidatus Solibacter	82	0.000778776	0.223379	1.68674	#N/A	Peripheral	Bacteria	Acidobacteria	Acidobacteriia	Solibacterales	Solibacteraceae (Subgroup 3)	Candidatus Solibacter	uncultured organism
HM244037.1.938	A95_uncultured euryarchaeote	82	0.000423045	0.138311	1.8327	#N/A	Peripheral	Archaea	Crenarchaeota	Bathyarchaeia	uncultured euryarchaeote	uncultured euryarchaeote	uncultured euryarchaeote	uncultured euryarchaeote
EU134349.1.1315	B1086_Anaeromyxobacter	81	0.000624108	0.26307	2.02286	#N/A	Peripheral	Bacteria	Proteobacteria	Deltaproteobacteria	Myxococcales	Archangiaceae	Anaeromyxobacter	#N/A
389a90ff7420f97d29d8d412b14274c2	F1817_unidentified	80	0.00136424	0	2.23037	#N/A	Peripheral	Fungi	unidentified	unidentified	unidentified	unidentified	unidentified	unidentified
073189d33f6691a39bdefc911b70821a	F368_Mortierella	79	0.0094341	0.0730652	2.06046	#N/A	Peripheral	Fungi	Mortierellomycota	Mortierellomycetes	Mortierellales	Mortierellaceae	Mortierella	Mortierella_alpina
EU155943.1.1446	A21_Methanosarcina	79	0.00451733	0	2.18789	#N/A	Peripheral	Archaea	Euryarchaeota	Methanomicrobia	Methanosarcinales	Methanosarcinaceae	Methanosarcina	#N/A
GU208219.1.1518	B152_uncultured prokaryote	79	0.000853607	0.252524	1.54077	#N/A	Peripheral	Bacteria	Acidobacteria	Subgroup 17	uncultured prokaryote	uncultured prokaryote	uncultured prokaryote	uncultured prokaryote
KX077526.1.909	A50_Candidatus Methanoperedens	79	0.00148985	0.0730652	2.02331	#N/A	Peripheral	Archaea	Euryarchaeota	Methanomicrobia	Methanosarcinales	Methanoperedenaceae	Candidatus Methanoperedens	#N/A
21eb885d20599a7efe0280eb6df4deee	A212_o_NA	78	0.00102661	0.271861	1.46779	#N/A	Peripheral	Archaea	Nanoarchaeaeota	Woesearchaeia	#N/A	#N/A	#N/A	#N/A
b5125403f85ff892eb1ae54e831f763e	F2249_o_NA	78	0.00037785	0.0973044	1.90584	#N/A	Peripheral	Fungi	#N/A	#N/A	#N/A	#N/A	#N/A	#N/A
9217952193f5731b811636fc017ccb1a	A106_uncultured euryarchaeote	77	0.00370612	0.0995109	1.93303	#N/A	Peripheral	Archaea	Altiarchaeota	Altiarchaeia	uncultured euryarchaeote	uncultured euryarchaeote	uncultured euryarchaeote	uncultured euryarchaeote
FQ659752.1.1370	B108_uncultured prokaryote	77	0.0011675	0.27492	1.85172	#N/A	Peripheral	Bacteria	Acidobacteria	Subgroup 17	uncultured prokaryote	uncultured prokaryote	uncultured prokaryote	uncultured prokaryote
HM062295.1.1407	B499_f_Solibacteraceae (Subgroup 3)	77	0.000541766	0.165289	1.75545	#N/A	Peripheral	Bacteria	Acidobacteria	Acidobacteriia	Solibacterales	Solibacteraceae (Subgroup 3)	#N/A	#N/A
79e5bb1a88fa55274a9b80cec5c3f421	F566_unidentified	76	0.000659938	0.122922	1.79305	#N/A	Peripheral	Fungi	unidentified	unidentified	unidentified	unidentified	unidentified	unidentified
946ac6b8b610fce4cc3c28903a6d03ef	A220_o_NA	76	0.00206508	0.167244	2.06849	#N/A	Peripheral	Archaea	Nanoarchaeaeota	Woesearchaeia	#N/A	#N/A	#N/A	#N/A
SH535943.07FU_JX385310_reps	F104_o_Pleosporales	75	0.0028888	0.422044	1.08352	#N/A	Peripheral	Fungi	Ascomycota	Dothideomycetes	Pleosporales	#N/A	#N/A	#N/A
3ea4f318fee69b185b13ace8a8b4e1e5	A206_o_NA	73	0.000413135	0.103584	1.71785	#N/A	Peripheral	Archaea	Thaumarchaeota	#N/A	#N/A	#N/A	#N/A	#N/A
5b164c63f194f1d4a7905e0b16e900a9	A304_uncultured euryarchaeote	72	0.000457896	0.228009	1.76615	#N/A	Peripheral	Archaea	Nanoarchaeaeota	Woesearchaeia	uncultured euryarchaeote	uncultured euryarchaeote	uncultured euryarchaeote	uncultured euryarchaeote
9514def78ee03440e5de68c8f1b9a10d	A136_o_NA	72	0.000472414	0.268904	1.68058	#N/A	Peripheral	Archaea	Thaumarchaeota	Marine Benthic Group A	#N/A	#N/A	#N/A	#N/A
ef9807487804c4145ec73f184a0d1548	A146_uncultured euryarchaeote	72	0.000883604	0.268133	1.28533	#N/A	Peripheral	Archaea	Altiarchaeota	Altiarchaeia	uncultured euryarchaeote	uncultured euryarchaeote	uncultured euryarchaeote	uncultured euryarchaeote
JX222048.1.1445	B217_uncultured	72	0.00252389	0.106096	1.72066	#N/A	Peripheral	Bacteria	Proteobacteria	Alphaproteobacteria	Rhizobiales	Methyloligellaceae	uncultured	#N/A
JF027785.1.1358	B221_Nocardioides	71	0.0037319	0.133307	1.6357	#N/A	Peripheral	Bacteria	Actinobacteria	Actinobacteria	Propionibacteriales	Nocardioidaceae	Nocardioides	#N/A
JF167895.1.1372	B449_uncultured bacterium 213	71	0.00228845	0.180123	1.85041	#N/A	Peripheral	Bacteria	Acidobacteria	Subgroup 6	uncultured bacterium 213	uncultured bacterium 213	uncultured bacterium 213	uncultured bacterium 213
[truncated: 1,938 more rows]

## Sheet: Nutrient-poor_CJ1(2018)_non-fer
OTU	OTU_id	Degree	Betweenness	Pi	zi	category	Role	Kingdom	Phylum	Class	Order	Family	Genus	Species
[truncated: 1,830 more rows]

## Sheet: Nutrient-poor_CJ2(2018)_fer
OTU	OTU_id	Degree	Betweenness	Pi	zi	category	Role	Kingdom	Phylum	Class	Order	Family	Genus	Species
[truncated: 1,467 more rows]

[truncated: 6 more sheets: Nutrient-poor_YS1_non-fer, Nutrient-poor_YS2_fer, Nutrient-rich_MY1_fer, Nutrient-rich_MY2_non-fer, Nutrient-rich_NJ1_fer, Nutrient-rich_NJ2_non-fer]
