# Supplementary material for: Compositional Shift of Bacterial, Archaeal, and Fungal Communities Is Dependent on Trophic Lifestyles in Rice Paddy Soil
Source: Front Microbiol. 2021 Sep 1;12:719486. doi: 10.3389/fmicb.2021.719486 (PMC8440912; doi:10.3389/fmicb.2021.719486)
Supplement: Supplementary file 1 [file Data_Sheet_1.zip › Table 13.XLSX]

## Sheet: Content
Supplementary Table 13. The profiles of microbial associations with methanogenic archaea
Sheet	Content
CJ1	The profiles of microbial associations with methanogenic archaea in CJ1 field
CJ2	The profiles of microbial associations with methanogenic archaea in CJ2 field
CJ1(2018)	The profiles of microbial associations with methanogenic archaea in CJ1 field (year 2018)
CJ2(2018)	The profiles of microbial associations with methanogenic archaea in CJ2 field (year 2018)
YS1	The profiles of microbial associations with methanogenic archaea in YS1 field
YS2	The profiles of microbial associations with methanogenic archaea in YS2 field
MY1	The profiles of microbial associations with methanogenic archaea in MY1 field
MY2	The profiles of microbial associations with methanogenic archaea in MY2 field
NJ1	The profiles of microbial associations with methanogenic archaea in NJ1 field
NJ2	The profiles of microbial associations with methanogenic archaea in NJ2 field

## Sheet: CJ1
Edge of methanogen and bacterial functional groups										Edge of methanogens
from	to	cor	p_value	Association	Category	Relationship				from	to	cor	p_value	Association	Category
A113_Methanosarcina	B8629_Methylocaldum	0.6085	0.0235	AB	positive	Methanogen-Methanotroph				A10_Methanosaeta	F4312_unidentified	0.7068	0.0098	AF	positive
A61_Methanosaeta	B8629_Methylocaldum	0.637	0.005	AB	positive	Methanogen-Methanotroph				A66_Methanosaeta	B1221_wastewater metagenome	0.7468	0.0137	AB	positive
A8_Methanobacterium	B13_Methylocystis	-0.6297	0.0396	AB	negative	Methanogen-Methanotroph				A31_Methanosaeta	F5529_o_NA	0.6187	0.005	AF	positive
A66_Methanosaeta	B4134_Methylobacter	0.6982	0.0334	AB	positive	Methanogen-Methanotroph				A19_Methanocella	F1830_unidentified	0.6826	0.0297	AF	positive
A115_Methanocella	B2937_Methylobacter	0.6862	0.005	AB	positive	Methanogen-Methanotroph				A66_Methanosaeta	B11135_uncultured soil bacterium PBS-II-37	0.6038	0.005	AB	positive
A125_Methanosaeta	B2937_Methylobacter	0.6888	0.005	AB	positive	Methanogen-Methanotroph				A66_Methanosaeta	F4942_o_NA	0.6354	0.0235	AF	positive
A115_Methanocella	B8400_Methylomicrobium	0.6708	0.005	AB	positive	Methanogen-Methanotroph				A44_Methanosaeta	F33_Schizothecium	-0.6117	0.0495	AF	negative
A125_Methanosaeta	B8400_Methylomicrobium	0.6398	0.005	AB	positive	Methanogen-Methanotroph				A93_Methanosarcina	B2972_uncultured prokaryote	0.7115	0.0137	AB	positive
B1606_Methylomonas	A144_Methanobacterium	0.6567	0.0235	AB	positive	Methanogen-Methanotroph				A19_Methanocella	F1062_o_NA	-0.6667	0.0198	AF	negative
A42_Methanosarcina	B1606_Methylomonas	0.7514	0.005	AB	positive	Methanogen-Methanotroph				A258_Methanosarcina	B4433_uncultured proteobacterium	0.6832	0.0137	AB	positive
A93_Methanosarcina	B6236_Anaerolinea	0.7767	0.005	AB	positive	Methanogen-Bacterial decomposer				A113_Methanosarcina	B4337_f_uncultured	0.7008	0.0137	AB	positive
B983_Anaerolinea	A31_Methanosaeta	0.6588	0.0235	AB	positive	Methanogen-Bacterial decomposer				A61_Methanosaeta	B4337_f_uncultured	0.6987	0.0334	AB	positive
B360_Phenylobacterium	A31_Methanosaeta	0.7142	0.0137	AB	positive	Methanogen-Bacterial decomposer				A21_Methanosarcina	B4244_o_NA	0.6007	0.0289	AB	positive
A144_Methanobacterium	B4443_Anaerolinea	0.6736	0.0137	AB	positive	Methanogen-Bacterial decomposer				A66_Methanosaeta	B4244_o_NA	0.7512	0.005	AB	positive
A42_Methanosarcina	B4443_Anaerolinea	0.7142	0.005	AB	positive	Methanogen-Bacterial decomposer				A42_Methanosarcina	B4313_Defluviicoccus	0.6778	0.005	AB	positive
A113_Methanosarcina	B3013_Anaerolinea	0.6985	0.0137	AB	positive	Methanogen-Bacterial decomposer				A258_Methanosarcina	A511_uncultured archaeon	0.8012	0.005	A	positive
A61_Methanosaeta	B3013_Anaerolinea	0.7369	0.0235	AB	positive	Methanogen-Bacterial decomposer				A36_Methanosarcina	F757_o_NA	0.711	0.0198	AF	positive
B11372_Paenibacillus	A258_Methanosarcina	0.6103	0.0433	AB	positive	Methanogen-Bacterial decomposer				A113_Methanosarcina	B3342_f_Pedosphaeraceae	0.6307	0.005	AB	positive
B9585_Phenylobacterium	A258_Methanosarcina	0.6254	0.0334	AB	positive	Methanogen-Bacterial decomposer				A61_Methanosaeta	B3342_f_Pedosphaeraceae	0.6198	0.005	AB	positive
A66_Methanosaeta	B1587_Anaerolinea	0.6734	0.005	AB	positive	Methanogen-Bacterial decomposer				A113_Methanosarcina	A638_o_NA	0.7462	0.0137	A	positive
A42_Methanosarcina	B5735_Paenibacillus	0.6112	0.0334	AB	positive	Methanogen-Bacterial decomposer				A61_Methanosaeta	A638_o_NA	0.7911	0.005	A	positive
A61_Methanosaeta	B271_Anaerolinea	-0.603	0.0297	AB	negative	Methanogen-Bacterial decomposer				A113_Methanosarcina	B6810_Haliangium	0.6838	0.0334	AB	positive
A93_Methanosarcina	B176_Phenylobacterium	0.7348	0.0137	AB	positive	Methanogen-Bacterial decomposer				A61_Methanosaeta	B6810_Haliangium	0.7082	0.0235	AB	positive
B325_Phenylobacterium	A115_Methanocella	0.6995	0.005	AB	positive	Methanogen-Bacterial decomposer				A66_Methanosaeta	F154_o_NA	0.6321	0.0334	AF	positive
A64_Methanobacterium	B1345_Phenylobacterium	0.6339	0.0235	AB	positive	Methanogen-Bacterial decomposer				A113_Methanosarcina	F1116_o_Agaricales	-0.8038	0.0396	AF	negative
A125_Methanosaeta	B325_Phenylobacterium	0.7119	0.005	AB	positive	Methanogen-Bacterial decomposer				A61_Methanosaeta	F1116_o_Agaricales	-0.8023	0.0099	AF	negative
B766_Syntrophobacter	A258_Methanosarcina	0.7568	0.0137	AB	positive	Methanogen-Syntroph				A144_Methanobacterium	B4535_uncultured organism	0.6019	0.0137	AB	positive
B1234_Syntrophus	A258_Methanosarcina	0.6957	0.0235	AB	positive	Methanogen-Syntroph				A113_Methanosarcina	F227_o_NA	-0.6087	0.0297	AF	negative
A42_Methanosarcina	B109_Syntrophobacter	0.6516	0.0395	AB	positive	Methanogen-Syntroph				A61_Methanosaeta	B10851_uncultured	0.6363	0.005	AB	positive
A64_Methanobacterium	B1532_Syntrophus	0.6256	0.0334	AB	positive	Methanogen-Syntroph				A115_Methanocella	B5648_uncultured prokaryote	0.6748	0.005	AB	positive
B1239_Syntrophus	A113_Methanosarcina	0.6926	0.0137	AB	positive	Methanogen-Syntroph				A125_Methanosaeta	B5648_uncultured prokaryote	0.6813	0.005	AB	positive
B433_Syntrophobacter	A12_Methanobacterium	-0.6729	0.0297	AB	negative	Methanogen-Syntroph				A113_Methanosarcina	F4325_o_NA	0.6651	0.005	AF	positive
A10_Methanosaeta	B433_Syntrophobacter	0.6434	0.0396	AB	positive	Methanogen-Syntroph				A61_Methanosaeta	F4325_o_NA	0.6953	0.0235	AF	positive
B1239_Syntrophus	A61_Methanosaeta	0.6969	0.0235	AB	positive	Methanogen-Syntroph				A113_Methanosarcina	F3871_unidentified	0.6298	0.0235	AF	positive
B3901_Anaeromyxobacter	A31_Methanosaeta	0.6895	0.005	AB	positive	Methanogen-Non-acetogenic syntroph				A61_Methanosaeta	F3871_unidentified	0.6341	0.0137	AF	positive
B2590_Geobacter	A31_Methanosaeta	0.7742	0.0137	AB	positive	Methanogen-Non-acetogenic syntroph				A144_Methanobacterium	B3696_uncultured Gemmatimonadetes bacterium	0.6904	0.005	AB	positive
B260_Anaeromyxobacter	A258_Methanosarcina	0.679	0.0137	AB	positive	Methanogen-Non-acetogenic syntroph				A42_Methanosarcina	B3696_uncultured Gemmatimonadetes bacterium	0.6844	0.005	AB	positive
B3867_Geobacter	A258_Methanosarcina	0.6917	0.005	AB	positive	Methanogen-Non-acetogenic syntroph				A125_Methanosaeta	B2787_f_WD2101 soil group	0.6162	0.0137	AB	positive
B114_Geobacter	A258_Methanosarcina	0.7637	0.0137	AB	positive	Methanogen-Non-acetogenic syntroph				A64_Methanobacterium	F1776_unidentified	0.6041	0.0235	AF	positive
B915_Geobacter	A258_Methanosarcina	0.7083	0.005	AB	positive	Methanogen-Non-acetogenic syntroph				A258_Methanosarcina	F645_unidentified	-0.8767	0.0198	AF	negative
B1677_Geobacter	A258_Methanosarcina	0.7351	0.0137	AB	positive	Methanogen-Non-acetogenic syntroph				A66_Methanosaeta	B524_o_RBG-13-54-9	0.6432	0.005	AB	positive
B259_Anaeromyxobacter	A258_Methanosarcina	0.7451	0.0334	AB	positive	Methanogen-Non-acetogenic syntroph				A93_Methanosarcina	A870_uncultured archaeon	0.7422	0.0137	A	positive
A64_Methanobacterium	B1403_Anaeromyxobacter	0.6643	0.0334	AB	positive	Methanogen-Non-acetogenic syntroph				A113_Methanosarcina	A177_o_NA	0.6114	0.019	A	positive
A115_Methanocella	B735_Anaeromyxobacter	0.7273	0.0235	AB	positive	Methanogen-Non-acetogenic syntroph				A42_Methanosarcina	B4831_uncultured	0.6338	0.0334	AB	positive
A125_Methanosaeta	B735_Anaeromyxobacter	0.6842	0.005	AB	positive	Methanogen-Non-acetogenic syntroph				A64_Methanobacterium	F508_o_NA	-0.8297	0.0297	AF	negative
A66_Methanosaeta	B435_Geobacter	0.7337	0.0137	AB	positive	Methanogen-Non-acetogenic syntroph				A115_Methanocella	F872_o_NA	0.7312	0.0235	AF	positive
A93_Methanosarcina	B1065_Geobacter	0.7758	0.0137	AB	positive	Methanogen-Non-acetogenic syntroph				A125_Methanosaeta	F872_o_NA	0.6764	0.0137	AF	positive
B233_Geobacter	A113_Methanosarcina	0.7454	0.0334	AB	positive	Methanogen-Non-acetogenic syntroph				A64_Methanobacterium	B12866_uncultured delta proteobacterium	0.601	0.0137	AB	positive
B1546_Geobacter	A93_Methanosarcina	0.8024	0.005	AB	positive	Methanogen-Non-acetogenic syntroph				A42_Methanosarcina	B11568_uncultured bacterium	0.6107	0.0235	AB	positive
A115_Methanocella	B540_Geobacter	0.737	0.0235	AB	positive	Methanogen-Non-acetogenic syntroph				A31_Methanosaeta	B1984_AKIW659	0.7173	0.005	AB	positive
A125_Methanosaeta	B540_Geobacter	0.6964	0.0235	AB	positive	Methanogen-Non-acetogenic syntroph				A113_Methanosarcina	B1313_o_NA	0.6051	0.0334	AB	positive
A64_Methanobacterium	B4112_Geobacter	0.6843	0.005	AB	positive	Methanogen-Non-acetogenic syntroph				A61_Methanosaeta	B1313_o_NA	0.6256	0.0235	AB	positive
B9063_Geobacter	A115_Methanocella	0.7112	0.005	AB	positive	Methanogen-Non-acetogenic syntroph				A66_Methanosaeta	F1508_o_NA	0.6488	0.005	AF	positive
B70_Geobacter	A144_Methanobacterium	0.7272	0.0137	AB	positive	Methanogen-Non-acetogenic syntroph				A93_Methanosarcina	B11794_uncultured bacterium	0.619	0.005	AB	positive
B1609_Geobacter	A144_Methanobacterium	0.6767	0.005	AB	positive	Methanogen-Non-acetogenic syntroph				A93_Methanosarcina	B2846_o_NA	0.7011	0.0137	AB	positive
A42_Methanosarcina	B70_Geobacter	0.7963	0.0137	AB	positive	Methanogen-Non-acetogenic syntroph				A64_Methanobacterium	B4737_f_WD2101 soil group	0.6098	0.0137	AB	positive
B233_Geobacter	A61_Methanosaeta	0.7577	0.005	AB	positive	Methanogen-Non-acetogenic syntroph				A42_Methanosarcina	B11138_Neochlamydia	0.6135	0.005	AB	positive
B1609_Geobacter	A42_Methanosarcina	0.704	0.0334	AB	positive	Methanogen-Non-acetogenic syntroph				A64_Methanobacterium	F5243_Acremonium	0.6339	0.0235	AF	positive
										A93_Methanosarcina	B6236_Anaerolinea	0.7767	0.005	AB	positive
										A113_Methanosarcina	B9997_uncultured	0.6938	0.0137	AB	positive
										A31_Methanosaeta	A420_uncultured archaeon	0.7444	0.0433	A	positive
										A44_Methanosaeta	A420_uncultured archaeon	0.6284	0.0388	A	positive
										A10_Methanosaeta	F5246_unidentified	0.6283	0.0098	AF	positive
										A66_Methanosaeta	B4189_uncultured bacterium	0.6375	0.0137	AB	positive
										A12_Methanobacterium	F1198_unidentified	-0.6187	0.0297	AF	negative
										A93_Methanosarcina	A494_uncultured crenarchaeote	0.7045	0.0137	A	positive
										A44_Methanosaeta	F115_unidentified	-0.6842	0.0297	AF	negative
										A258_Methanosarcina	F1078_unidentified	0.6482	0.0137	AF	positive
										A42_Methanosarcina	B5755_Candidatus Methylospira	0.6938	0.0137	AB	positive
										A42_Methanosarcina	B8417_o_NA	0.6818	0.0334	AB	positive
										A12_Methanobacterium	F2563_o_NA	-0.6234	0.0495	AF	negative
										A258_Methanosarcina	F3405_unidentified	0.661	0.005	AF	positive
										A258_Methanosarcina	B2795_o_SBR1031	0.7445	0.0235	AB	positive
										A66_Methanosaeta	B5591_unidentified	0.65	0.005	AB	positive
										A258_Methanosarcina	B6585_Defluviicoccus	0.6816	0.0235	AB	positive
										A93_Methanosarcina	A982_uncultured archaeon	0.6824	0.0137	A	positive
										A258_Methanosarcina	F6414_o_NA	0.6495	0.005	AF	positive
										A115_Methanocella	B11468_uncultured	0.6013	0.0433	AB	positive
										A93_Methanosarcina	B12469_Cyanothece PCC-7424	0.6108	0.0137	AB	positive
										A258_Methanosarcina	F503_Scedosporium	0.7127	0.0198	AF	positive
										A258_Methanosarcina	B3652_o_NA	0.6073	0.0334	AB	positive
										A42_Methanosarcina	B2314_uncultured bacterium SJA-22	0.6048	0.005	AB	positive
										A64_Methanobacterium	F252_unidentified	0.7976	0.0091	AF	positive
										A258_Methanosarcina	B5337_o_Acidobacteriales	0.7248	0.0137	AB	positive
										A12_Methanobacterium	B8655_Haliangium	-0.6509	0.0198	AB	negative
										A4_Methanosaeta	F51_o_Helotiales	0.7375	0.0198	AF	positive
										A64_Methanobacterium	B5864_o_NA	0.6522	0.0235	AB	positive
										A93_Methanosarcina	B6507_Subgroup 10	0.7109	0.005	AB	positive
										B3738_uncultured bacterium	A31_Methanosaeta	0.6046	0.005	AB	positive
										B11049_f_Bacteriovoracaceae	A31_Methanosaeta	0.6316	0.005	AB	positive
										B7232_f_Methylococcaceae	A31_Methanosaeta	0.6003	0.005	AB	positive
										F625_unidentified	A31_Methanosaeta	0.6937	0.0137	AF	positive
										A256_uncultured euryarchaeote	A31_Methanosaeta	0.6831	0.0137	A	positive
										A384_uncultured archaeon	A31_Methanosaeta	0.6803	0.005	A	positive
										A684_o_NA	A31_Methanosaeta	0.6605	0.0235	A	positive
										A554_uncultured archaeon	A31_Methanosaeta	0.6522	0.0334	A	positive
										A566_uncultured euryarchaeote	A31_Methanosaeta	0.6075	0.0235	A	positive
										B2222_o_NA	A31_Methanosaeta	0.6306	0.0235	AB	positive
										B4394_uncultured Spirochaetales bacterium	A31_Methanosaeta	0.6711	0.0137	AB	positive
										B4922_f_Pedosphaeraceae	A31_Methanosaeta	0.688	0.0433	AB	positive
										F3658_o_NA	A31_Methanosaeta	0.6229	0.0334	AF	positive
										B3901_Anaeromyxobacter	A31_Methanosaeta	0.6895	0.005	AB	positive
										F2441_unidentified	A31_Methanosaeta	0.6525	0.0137	AF	positive
										B9772_uncultured Bellilinea sp.	A31_Methanosaeta	0.6444	0.005	AB	positive
										F297_unidentified	A31_Methanosaeta	0.6746	0.005	AF	positive
										F11_unidentified	A31_Methanosaeta	0.7529	0.0396	AF	positive
										A368_o_NA	A31_Methanosaeta	0.7531	0.0235	A	positive
										B9545_pItb-vmat-59	A31_Methanosaeta	0.6846	0.005	AB	positive
										B104_f_uncultured	A31_Methanosaeta	0.6768	0.0137	AB	positive
										B2433_f_Clostridiaceae 1	A31_Methanosaeta	0.6876	0.0235	AB	positive
										B3383_f_Ruminococcaceae	A31_Methanosaeta	0.6296	0.0235	AB	positive
										B3627_f_Burkholderiaceae	A31_Methanosaeta	0.7292	0.005	AB	positive
										B1095_Candidatus Solibacter	A31_Methanosaeta	0.6797	0.0137	AB	positive
										B47_f_uncultured	A31_Methanosaeta	-0.6019	0.0495	AB	negative
										B539_o_Subgroup 13	A31_Methanosaeta	0.6147	0.005	AB	positive
										B6163_Novosphingobium	A31_Methanosaeta	0.6772	0.0137	AB	positive
										B594_metagenome	A31_Methanosaeta	0.6684	0.005	AB	positive
										B802_ADurb.Bin063-1	A31_Methanosaeta	0.6456	0.0137	AB	positive
										B984_uncultured Chloroflexi bacterium	A31_Methanosaeta	0.7586	0.0137	AB	positive
										F3366_unidentified	A31_Methanosaeta	0.6642	0.005	AF	positive
										F143_unidentified	A31_Methanosaeta	0.6482	0.0235	AF	positive
										B6271_Nostoc PCC-7107	A31_Methanosaeta	0.7107	0.005	AB	positive
										B1535_planctomycete WWH14	A31_Methanosaeta	0.6109	0.0137	AB	positive
										B3297_uncultured Prosthecobacter sp.	A31_Methanosaeta	0.6599	0.0235	AB	positive
										B2590_Geobacter	A31_Methanosaeta	0.7742	0.0137	AB	positive
										A67_unidentified archaeon	A31_Methanosaeta	0.6125	0.019	A	positive
										B12272_f_Parachlamydiaceae	A31_Methanosaeta	0.6107	0.005	AB	positive
										F977_o_NA	A31_Methanosaeta	0.6723	0.005	AF	positive
										B366_uncultured	A31_Methanosaeta	0.6067	0.0137	AB	positive
										A143_uncultured euryarchaeote	A31_Methanosaeta	0.7019	0.0235	A	positive
										A651_Candidatus Diapherotrites archaeon ADurb.Bin253	A31_Methanosaeta	0.7201	0.0137	A	positive
										B1016_uncultured soil bacterium	A31_Methanosaeta	0.6102	0.005	AB	positive
										B6602_uncultured	A31_Methanosaeta	0.6278	0.0137	AB	positive
										B3371_f_Ruminococcaceae	A31_Methanosaeta	0.6331	0.0334	AB	positive
										B2676_Clostridium sensu stricto 3	A31_Methanosaeta	0.6321	0.0235	AB	positive
										B3693_o_NA	A31_Methanosaeta	0.7349	0.005	AB	positive
										B633_o_NA	A31_Methanosaeta	0.7206	0.0137	AB	positive
										B898_Haliangium	A31_Methanosaeta	0.733	0.0137	AB	positive
										B60_uncultured bacterium	A31_Methanosaeta	-0.7339	0.0198	AB	negative
										B484_uncultured	A31_Methanosaeta	0.6038	0.0137	AB	positive
										B214_Sulfurifustis	A31_Methanosaeta	-0.8613	0.0297	AB	negative
										B5047_Lysinibacillus	A31_Methanosaeta	0.6328	0.0235	AB	positive
										A302_Candidatus Nitrocosmicus	A31_Methanosaeta	0.7787	0.0235	A	positive
										A1037_uncultured euryarchaeote	A31_Methanosaeta	0.6361	0.0137	A	positive
										F364_o_NA	A31_Methanosaeta	0.7996	0.0137	AF	positive
										B8528_uncultured	A31_Methanosaeta	0.6284	0.0137	AB	positive
										A760_o_NA	A31_Methanosaeta	0.6379	0.005	A	positive
										F578_o_NA	A31_Methanosaeta	0.806	0.0137	AF	positive
										B1043_uncultured proteobacterium	A31_Methanosaeta	0.6195	0.0235	AB	positive
										B191_MND1	A31_Methanosaeta	0.6154	0.0235	AB	positive
										B1368_Sh765B-TzT-35	A31_Methanosaeta	0.6604	0.0137	AB	positive
										B711_uncultured prokaryote	A31_Methanosaeta	0.6795	0.005	AB	positive
										A44_Methanosaeta	A31_Methanosaeta	0.6154	0.0091	A	positive
										B8201_Acidibacter	A31_Methanosaeta	0.6342	0.0137	AB	positive
										B495_o_Betaproteobacteriales	A31_Methanosaeta	0.6359	0.0433	AB	positive
										B2643_Gemmatimonas	A31_Methanosaeta	0.711	0.005	AB	positive
										B789_uncultured	A31_Methanosaeta	0.6526	0.019	AB	positive
										B80_ADurb.Bin063-1	A31_Methanosaeta	0.6564	0.0334	AB	positive
										B89_f_Gallionellaceae	A31_Methanosaeta	0.6268	0.0137	AB	positive
										B1208_o_OPB41	A31_Methanosaeta	0.6567	0.0235	AB	positive
										A134_uncultured	A31_Methanosaeta	0.7782	0.005	A	positive
										B983_Anaerolinea	A31_Methanosaeta	0.6588	0.0235	AB	positive
										B395_f_uncultured	A31_Methanosaeta	0.6551	0.0235	AB	positive
										B4694_uncultured Nitrospirae bacterium	A31_Methanosaeta	0.6775	0.0137	AB	positive
										B73_o_NA	A31_Methanosaeta	0.6556	0.0137	AB	positive
										B10074_f_SC-I-84	A31_Methanosaeta	0.6011	0.0235	AB	positive
										B393_uncultured	A31_Methanosaeta	0.625	0.0235	AB	positive
										B360_Phenylobacterium	A31_Methanosaeta	0.7142	0.0137	AB	positive
										B12190_Legionella	A31_Methanosaeta	0.6114	0.005	AB	positive
										B4153_Candidatus Udaeobacter	A31_Methanosaeta	0.7529	0.0137	AB	positive
										B464_uncultured	A31_Methanosaeta	0.6741	0.005	AB	positive
										B2913_f_BIrii41	A31_Methanosaeta	0.6633	0.0137	AB	positive
										B1280_uncultured Ferrimicrobium sp.	A31_Methanosaeta	0.7232	0.0334	AB	positive
										B1547_Flavobacterium	A31_Methanosaeta	0.7309	0.005	AB	positive
										B852_Cryobacterium	A31_Methanosaeta	0.7249	0.005	AB	positive
										B504_Ramlibacter	A31_Methanosaeta	0.657	0.0235	AB	positive
										B1689_Haliangium	A31_Methanosaeta	0.6169	0.0235	AB	positive
										B3110_Mycobacterium	A31_Methanosaeta	0.6863	0.005	AB	positive
										B55_Thiobacillus	A31_Methanosaeta	0.7289	0.0235	AB	positive
										B2398_Roseomonas	A31_Methanosaeta	0.6812	0.0137	AB	positive
										B5550_f_0319-6G20	A31_Methanosaeta	0.6427	0.0137	AB	positive
										B1501_Allorhizobium-Neorhizobium-Pararhizobium-Rhizobium	A31_Methanosaeta	0.6107	0.0334	AB	positive
										B99_ADurb.Bin063-1	A31_Methanosaeta	0.6851	0.0137	AB	positive
										B2022_Massilia	A31_Methanosaeta	0.7718	0.0137	AB	positive
										B6371_Micromonospora	A31_Methanosaeta	0.6482	0.005	AB	positive
										B2944_uncultured soil bacterium	A31_Methanosaeta	0.6297	0.0235	AB	positive
										B4885_Ohtaekwangia	A31_Methanosaeta	0.6395	0.0235	AB	positive
										F2910_Vishniacozyma	A31_Methanosaeta	0.6382	0.005	AF	positive
										F3287_Mortierella	A31_Methanosaeta	0.6094	0.005	AF	positive
										F2848_Strelitziana	A31_Methanosaeta	0.6474	0.0137	AF	positive
										A64_Methanobacterium	B1764_uncultured	0.6252	0.005	AB	positive
										A66_Methanosaeta	F2344_unidentified	0.7257	0.005	AF	positive
										A115_Methanocella	B5593_Terrimonas	0.7072	0.0137	AB	positive
										A125_Methanosaeta	B5593_Terrimonas	0.7064	0.005	AB	positive
										A93_Methanosarcina	B1370_f_Pedosphaeraceae	0.6216	0.0137	AB	positive
										A113_Methanosarcina	B713_uncultured eubacterium WCHB1-50	0.69	0.0235	AB	positive
										A61_Methanosaeta	B713_uncultured eubacterium WCHB1-50	0.7317	0.0235	AB	positive
										A21_Methanosarcina	F545_o_NA	-0.8513	0.0099	AF	negative
										A66_Methanosaeta	A679_Candidatus Diapherotrites archaeon ADurb.Bin253	0.7033	0.0137	A	positive
										A66_Methanosaeta	B8272_uncultured	0.6379	0.0137	AB	positive
										A113_Methanosarcina	F312_unidentified	0.6917	0.005	AF	positive
										A61_Methanosaeta	F312_unidentified	0.681	0.005	AF	positive
										A19_Methanocella	F446_unidentified	-0.7401	0.0099	AF	negative
										A64_Methanobacterium	F446_unidentified	0.6134	0.0396	AF	positive
										A258_Methanosarcina	B3440_wastewater metagenome	0.7341	0.005	AB	positive
										A12_Methanobacterium	F933_Mortierella	-0.6739	0.0198	AF	negative
										A258_Methanosarcina	B597_o_NA	0.7871	0.005	AB	positive
										A12_Methanobacterium	B2817_uncultured bacterium	-0.717	0.0198	AB	negative
										A12_Methanobacterium	B1021_f_Roseiflexaceae	-0.667	0.0297	AB	negative
										A36_Methanosarcina	B1021_f_Roseiflexaceae	0.7697	0.0396	AB	positive
										A93_Methanosarcina	F692_unidentified	0.7881	0.0137	AF	positive
										A8_Methanobacterium	F91_unidentified	0.7389	0.0297	AF	positive
										A44_Methanosaeta	B591_o_NA	0.6018	0.0289	AB	positive
										A258_Methanosarcina	B12612_o_NA	0.627	0.005	AB	positive
										A61_Methanosaeta	B2234_f_Pedosphaeraceae	0.6062	0.005	AB	positive
										A64_Methanobacterium	B554_uncultured	0.6561	0.005	AB	positive
										A93_Methanosarcina	A659_uncultured archaeon	0.7341	0.005	A	positive
										A144_Methanobacterium	B4443_Anaerolinea	0.6736	0.0137	AB	positive
										A42_Methanosarcina	B4443_Anaerolinea	0.7142	0.005	AB	positive
										A113_Methanosarcina	B3013_Anaerolinea	0.6985	0.0137	AB	positive
										A61_Methanosaeta	B3013_Anaerolinea	0.7369	0.0235	AB	positive
										A64_Methanobacterium	B9918_o_NA	0.6388	0.005	AB	positive
										A10_Methanosaeta	F4347_unidentified	0.702	0.0098	AF	positive
										A258_Methanosarcina	B1716_ADurb.Bin063-1	0.7742	0.005	AB	positive
										A258_Methanosarcina	B4909_o_NA	0.6107	0.005	AB	positive
										A66_Methanosaeta	B9142_uncultured	0.6015	0.005	AB	positive
										A8_Methanobacterium	B1750_uncultured	-0.6986	0.0198	AB	negative
										A8_Methanobacterium	F188_unidentified	0.7488	0.0297	AF	positive
										A66_Methanosaeta	A206_o_NA	0.7722	0.0137	A	positive
										A64_Methanobacterium	F20_Mortierella	-0.6677	0.0297	AF	negative
										A12_Methanobacterium	B3786_Candidatus Ovatusbacter	-0.697	0.0198	AB	negative
										A8_Methanobacterium	B5840_uncultured soil bacterium	-0.7719	0.0099	AB	negative
										A10_Methanosaeta	F2005_o_NA	0.7123	0.0098	AF	positive
										A64_Methanobacterium	F56_o_NA	0.7019	0.0297	AF	positive
										A19_Methanocella	F947_o_NA	0.6322	0.0296	AF	positive
										A44_Methanosaeta	B6238_o_NA	0.6336	0.0098	AB	positive
										A115_Methanocella	A444_uncultured archaeon	0.7531	0.005	A	positive
										A125_Methanosaeta	A444_uncultured archaeon	0.702	0.005	A	positive
										A42_Methanosarcina	B2982_f_mle1-27	0.6704	0.0137	AB	positive
										A258_Methanosarcina	F87_Exophiala	-0.7759	0.0099	AF	negative
										A113_Methanosarcina	A277_uncultured archaeon	0.7937	0.0334	A	positive
										A61_Methanosaeta	A277_uncultured archaeon	0.7834	0.0235	A	positive
										A12_Methanobacterium	F819_unidentified	-0.7716	0.0099	AF	negative
										A42_Methanosarcina	B7718_uncultured	0.6436	0.0137	AB	positive
										A113_Methanosarcina	B4530_uncultured bacterium	0.6671	0.0137	AB	positive
										A61_Methanosaeta	B4530_uncultured bacterium	0.6467	0.0137	AB	positive
										A113_Methanosarcina	A213_uncultured euryarchaeote	0.6073	0.0388	A	positive
										A64_Methanobacterium	B9280_uncultured soil bacterium	0.6507	0.005	AB	positive
										A258_Methanosarcina	B1634_Desulfomonile	0.6802	0.0235	AB	positive
										A8_Methanobacterium	F576_unidentified	-0.7097	0.0198	AF	negative
										A66_Methanosaeta	B2034_AKIW659	0.6567	0.0289	AB	positive
										A42_Methanosarcina	B12883_o_SJA-28	0.6141	0.0334	AB	positive
										A8_Methanobacterium	F39_Mrakiella	-0.767	0.0099	AF	negative
										A61_Methanosaeta	F39_Mrakiella	0.6342	0.0495	AF	positive
										A42_Methanosarcina	B10613_Chloronema	0.611	0.0137	AB	positive
										A21_Methanosarcina	F1491_unidentified	0.6146	0.0289	AF	positive
										A66_Methanosaeta	F1491_unidentified	0.7672	0.005	AF	positive
										A258_Methanosarcina	A553_uncultured archaeon	0.6946	0.0235	A	positive
										A66_Methanosaeta	B4339_Pedosphaera	0.7061	0.005	AB	positive
										A8_Methanobacterium	B1376_uncultured soil bacterium	-0.641	0.0297	AB	negative
										A66_Methanosaeta	F389_o_NA	-0.8233	0.0198	AF	negative
										A42_Methanosarcina	F4184_o_NA	0.6431	0.0235	AF	positive
										A21_Methanosarcina	B4246_o_NA	0.7637	0.0098	AB	positive
										A113_Methanosarcina	B8217_f_Anaerolineaceae	0.7009	0.0137	AB	positive
										A61_Methanosaeta	B8217_f_Anaerolineaceae	0.7357	0.005	AB	positive
										A258_Methanosarcina	F350_unidentified	-0.7957	0.0099	AF	negative
										A93_Methanosarcina	F648_Phaeosphaeria	0.7121	0.0235	AF	positive
										A66_Methanosaeta	F992_Coprinellus	0.6479	0.0091	AF	positive
										A8_Methanobacterium	F102_o_NA	0.741	0.0099	AF	positive
										A42_Methanosarcina	B10951_Sandaracinus	0.6248	0.0235	AB	positive
										A64_Methanobacterium	F3903_unidentified	0.628	0.005	AF	positive
										A144_Methanobacterium	B12094_Chthonomonas	0.6036	0.0137	AB	positive
										A144_Methanobacterium	B7816_uncultured Archangiaceae bacterium	0.6629	0.0137	AB	positive
										A42_Methanosarcina	B7816_uncultured Archangiaceae bacterium	0.7524	0.0137	AB	positive
										A44_Methanosaeta	B174_f_uncultured	0.638	0.0495	AB	positive
										A144_Methanobacterium	B10534_f_0319-6G20	0.6327	0.0137	AB	positive
										A42_Methanosarcina	B10534_f_0319-6G20	0.6693	0.005	AB	positive
										A258_Methanosarcina	F2876_unidentified	0.7225	0.0235	AF	positive
										A66_Methanosaeta	B9081_uncultured bacterium	0.6179	0.0235	AB	positive
										A66_Methanosaeta	F248_unidentified	0.6121	0.0235	AF	positive
										A93_Methanosarcina	F2686_o_NA	0.7238	0.0235	AF	positive
										A258_Methanosarcina	B8375_o_OPB41	0.6688	0.0334	AB	positive
										A12_Methanobacterium	F1121_o_NA	-0.6801	0.0198	AF	negative
										A21_Methanosarcina	B3926_uncultured sludge bacterium A31	0.6185	0.0495	AB	positive
										A66_Methanosaeta	A998_uncultured archaeon	0.6144	0.0433	A	positive
										A42_Methanosarcina	B7878_Leptolyngbya ANT.L52.2	0.6006	0.005	AB	positive
										A66_Methanosaeta	F2628_o_NA	0.6333	0.0137	AF	positive
										A113_Methanosarcina	F2629_o_NA	0.6422	0.0137	AF	positive
										A61_Methanosaeta	F2629_o_NA	0.6531	0.005	AF	positive
										A258_Methanosarcina	F6526_o_NA	0.6442	0.0137	AF	positive
										B11372_Paenibacillus	A258_Methanosarcina	0.6103	0.0433	AB	positive
										F7160_o_NA	A258_Methanosarcina	0.6013	0.0334	AF	positive
										B9847_o_Myxococcales	A258_Methanosarcina	0.6685	0.0235	AB	positive
										B2451_f_Pedosphaeraceae	A258_Methanosarcina	0.7327	0.005	AB	positive
										B2060_o_NA	A258_Methanosarcina	0.6974	0.0235	AB	positive
										F84_o_NA	A258_Methanosarcina	0.6606	0.0495	AF	positive
										B11381_f_WD2101 soil group	A258_Methanosarcina	0.6436	0.005	AB	positive
										F4046_unidentified	A258_Methanosarcina	0.7214	0.005	AF	positive
										F77_unidentified	A258_Methanosarcina	-0.803	0.0495	AF	negative
										A945_uncultured euryarchaeote	A258_Methanosarcina	0.756	0.005	A	positive
										B2748_uncultured	A258_Methanosarcina	0.6897	0.0091	AB	positive
										A885_uncultured archaeon	A258_Methanosarcina	0.7188	0.005	A	positive
										F25_o_Pleosporales	A258_Methanosarcina	0.7881	0.0198	AF	positive
										A105_uncultured Bathyarchaeota archaeon	A258_Methanosarcina	0.6454	0.019	A	positive
										F5378_unidentified	A258_Methanosarcina	0.6429	0.0137	AF	positive
										B4233_Candidatus Solibacter	A258_Methanosarcina	0.6077	0.0235	AB	positive
										B1939_Bryobacter	A258_Methanosarcina	0.655	0.0137	AB	positive
										F127_Oberwinklerozyma	A258_Methanosarcina	0.6106	0.0495	AF	positive
										B8564_f_Isosphaeraceae	A258_Methanosarcina	0.6414	0.0137	AB	positive
										A952_uncultured archaeon	A258_Methanosarcina	0.6713	0.005	A	positive
										F1109_unidentified	A258_Methanosarcina	-0.6023	0.0396	AF	negative
										A842_Diapherotrites archaeon SCGC AAA011-K09	A258_Methanosarcina	0.6743	0.0137	A	positive
										F3675_unidentified	A258_Methanosarcina	0.7284	0.005	AF	positive
										F3676_o_NA	A258_Methanosarcina	0.6194	0.0235	AF	positive
										A572_uncultured crenarchaeote	A258_Methanosarcina	0.6914	0.0137	A	positive
										B11399_uncultured	A258_Methanosarcina	0.6293	0.0235	AB	positive
										B766_Syntrophobacter	A258_Methanosarcina	0.7568	0.0137	AB	positive
										B260_Anaeromyxobacter	A258_Methanosarcina	0.679	0.0137	AB	positive
										B581_o_Subgroup 7	A258_Methanosarcina	0.7659	0.0137	AB	positive
										B2711_Angustibacter	A258_Methanosarcina	0.6801	0.0137	AB	positive
										B2377_Desulfobacca	A258_Methanosarcina	0.7471	0.005	AB	positive
										B801_MND1	A258_Methanosarcina	0.7167	0.005	AB	positive
										B993_o_Gaiellales	A258_Methanosarcina	0.7388	0.0137	AB	positive
										A667_o_NA	A258_Methanosarcina	0.6641	0.0334	A	positive
										B2694_Spirochaeta 2	A258_Methanosarcina	0.6214	0.0137	AB	positive
										B3063_Pseudomonas	A258_Methanosarcina	0.7579	0.0137	AB	positive
										B2607_Azoarcus	A258_Methanosarcina	0.7189	0.005	AB	positive
										B45_f_Blastocatellaceae	A258_Methanosarcina	-0.6152	0.0495	AB	negative
										B340_o_Microtrichales	A258_Methanosarcina	0.6885	0.0334	AB	positive
										B10800_o_NA	A258_Methanosarcina	0.6548	0.005	AB	positive
										B12934_Sphingomonas	A258_Methanosarcina	0.6277	0.005	AB	positive
										F2959_o_NA	A258_Methanosarcina	0.6424	0.0137	AF	positive
										B1574_f_Anaerolineaceae	A258_Methanosarcina	0.6237	0.0137	AB	positive
										A312_uncultured euryarchaeote	A258_Methanosarcina	0.803	0.0137	A	positive
										B10558_o_Sphingobacteriales	A258_Methanosarcina	0.6723	0.005	AB	positive
										B969_f_uncultured	A258_Methanosarcina	0.7045	0.0235	AB	positive
										F3373_o_NA	A258_Methanosarcina	0.6585	0.0137	AF	positive
										B8964_Hydrogenispora	A258_Methanosarcina	0.6661	0.0137	AB	positive
										F82_Schizothecium	A258_Methanosarcina	0.6955	0.0396	AF	positive
										F4457_Setophoma	A258_Methanosarcina	0.6889	0.005	AF	positive
										B965_Candidatus Solibacter	A258_Methanosarcina	0.7572	0.0137	AB	positive
										B6689_uncultured Caldilineaceae bacterium	A258_Methanosarcina	0.6534	0.0137	AB	positive
										F13_Schizothecium	A258_Methanosarcina	-0.8307	0.0198	AF	negative
										B12151_o_MSBL9	A258_Methanosarcina	0.6077	0.0334	AB	positive
										F5169_o_NA	A258_Methanosarcina	0.6159	0.0137	AF	positive
										B9360_Chryseolinea	A258_Methanosarcina	0.6501	0.0235	AB	positive
										F5854_o_NA	A258_Methanosarcina	0.6144	0.0235	AF	positive
										B1323_f_SC-I-84	A258_Methanosarcina	0.7146	0.0137	AB	positive
										B3277_uncultured	A258_Methanosarcina	0.6325	0.0296	AB	positive
										B10211_uncultured Planctomyces sp.	A258_Methanosarcina	0.6385	0.0334	AB	positive
										B312_Candidatus Udaeobacter	A258_Methanosarcina	0.72	0.0235	AB	positive
										B4258_Iamia	A258_Methanosarcina	0.6162	0.0235	AB	positive
										B9728_f_SG8-4	A258_Methanosarcina	0.6721	0.0137	AB	positive
										B755_AKIW659	A258_Methanosarcina	0.6789	0.0433	AB	positive
										B864_Pseudolabrys	A258_Methanosarcina	0.7113	0.005	AB	positive
										F1294_o_NA	A258_Methanosarcina	0.6547	0.0388	AF	positive
										B10055_Nostoc PCC-7107	A258_Methanosarcina	0.6583	0.005	AB	positive
										A1130_Candidatus Iainarchaeum	A258_Methanosarcina	0.6418	0.0137	A	positive
										B193_Sideroxydans	A258_Methanosarcina	0.7056	0.0137	AB	positive
										B2380_Sh765B-TzT-35	A258_Methanosarcina	0.6756	0.0137	AB	positive
										B1827_f_URHD0088	A258_Methanosarcina	0.6632	0.0137	AB	positive
										B5996_uncultured bacterium	A258_Methanosarcina	0.614	0.005	AB	positive
										B4995_Chthoniobacter	A258_Methanosarcina	0.6157	0.0137	AB	positive
										B1234_Syntrophus	A258_Methanosarcina	0.6957	0.0235	AB	positive
										B3430_Conexibacter	A258_Methanosarcina	0.6502	0.0137	AB	positive
										B3062_uncultured bacterium	A258_Methanosarcina	0.6817	0.0137	AB	positive
										B2316_f_Polyangiaceae	A258_Methanosarcina	0.7047	0.005	AB	positive
										B63_f_SC-I-84	A258_Methanosarcina	0.7623	0.0137	AB	positive
										B2426_Pedobacter	A258_Methanosarcina	0.6758	0.0137	AB	positive
										B2406_f_uncultured	A258_Methanosarcina	0.7011	0.0334	AB	positive
										B2265_Stenotrophomonas	A258_Methanosarcina	0.6878	0.0137	AB	positive
										B224_uncultured prokaryote	A258_Methanosarcina	0.6725	0.0137	AB	positive
										B4199_f_0319-6G20	A258_Methanosarcina	0.6798	0.0137	AB	positive
										A88_Candidatus Methanoperedens	A258_Methanosarcina	0.844	0.005	A	positive
										B1812_uncultured soil bacterium	A258_Methanosarcina	0.6711	0.0137	AB	positive
										B3867_Geobacter	A258_Methanosarcina	0.6917	0.005	AB	positive
										A275_Candidatus Nitrocosmicus	A258_Methanosarcina	0.8545	0.0137	A	positive
										B1623_uncultured	A258_Methanosarcina	0.7046	0.0137	AB	positive
										B114_Geobacter	A258_Methanosarcina	0.7637	0.0137	AB	positive
										B669_Marmoricola	A258_Methanosarcina	0.7155	0.0137	AB	positive
										B381_Hyphomicrobium	A258_Methanosarcina	0.6895	0.0334	AB	positive
										B2879_Jatrophihabitans	A258_Methanosarcina	0.7691	0.0137	AB	positive
										B5444_Terrimonas	A258_Methanosarcina	0.7135	0.0235	AB	positive
										B10075_Dokdonella	A258_Methanosarcina	0.6264	0.0235	AB	positive
										B915_Geobacter	A258_Methanosarcina	0.7083	0.005	AB	positive
										B1677_Geobacter	A258_Methanosarcina	0.7351	0.0137	AB	positive
										B259_Anaeromyxobacter	A258_Methanosarcina	0.7451	0.0334	AB	positive
										B1315_uncultured	A258_Methanosarcina	0.6423	0.0137	AB	positive
										B1502_uncultured Catenulispora sp.	A258_Methanosarcina	0.6923	0.0137	AB	positive
										B9978_uncultured Rubrobacteraceae bacterium	A258_Methanosarcina	0.6546	0.0137	AB	positive
										B947_Flavisolibacter	A258_Methanosarcina	0.7175	0.0137	AB	positive
										B9585_Phenylobacterium	A258_Methanosarcina	0.6254	0.0334	AB	positive
										B458_uncultured Aminicenantes bacterium	A258_Methanosarcina	-0.7241	0.0198	AB	negative
										B1902_uncultured bacterium	A258_Methanosarcina	0.7072	0.0137	AB	positive
										A1_unidentified archaeon	A258_Methanosarcina	0.8686	0.0235	A	positive
										B5356_uncultured	A258_Methanosarcina	0.6625	0.0137	AB	positive
										B1592_f_Burkholderiaceae	A258_Methanosarcina	0.776	0.005	AB	positive
										B1360_uncultured soil bacterium	A258_Methanosarcina	0.7046	0.0137	AB	positive
										A259_uncultured bacterium	A258_Methanosarcina	0.7925	0.005	A	positive
										B6502_uncultured bacterium SJA-121	A258_Methanosarcina	0.6419	0.0137	AB	positive
										B9589_Subgroup 10	A258_Methanosarcina	0.6342	0.005	AB	positive
										B1845_Desulfatiglans	A258_Methanosarcina	0.6472	0.005	AB	positive
										B7762_Bacillus	A258_Methanosarcina	0.7012	0.0235	AB	positive
										B2550_Pedosphaera	A258_Methanosarcina	0.7036	0.0235	AB	positive
										F1150_Pseudallescheria	A258_Methanosarcina	0.7891	0.0137	AF	positive
										F30_f_Didymellaceae	A258_Methanosarcina	0.6543	0.0297	AF	positive
										F2193_Beauveria	A258_Methanosarcina	0.6698	0.0137	AF	positive
										F3_Solicoccozyma	A258_Methanosarcina	0.6269	0.0297	AF	positive
										F245_Plectosphaerella	A258_Methanosarcina	0.7574	0.0198	AF	positive
										F1_Guehomyces	A258_Methanosarcina	0.6259	0.0495	AF	positive
										F6_Pseudeurotium	A258_Methanosarcina	0.7474	0.0495	AF	positive
										F9_o_NA	A258_Methanosarcina	0.6283	0.0396	AF	positive
										F111_Pseudeurotium	A258_Methanosarcina	0.6252	0.0495	AF	positive
										F12_Pseudeurotium	A258_Methanosarcina	0.6199	0.0297	AF	positive
										F673_unidentified	A258_Methanosarcina	0.6374	0.0091	AF	positive
										A113_Methanosarcina	B8178_f_uncultured	0.6654	0.0235	AB	positive
										A61_Methanosaeta	B8178_f_uncultured	0.6496	0.0137	AB	positive
										A66_Methanosaeta	B3274_Leptolinea	0.7014	0.0137	AB	positive
										A125_Methanosaeta	F4570_Torula	0.6064	0.0334	AF	positive
										A12_Methanobacterium	F1885_unidentified	-0.6992	0.0099	AF	negative
										A93_Methanosarcina	A620_uncultured euryarchaeote	0.7111	0.005	A	positive
										A44_Methanosaeta	F393_unidentified	-0.6614	0.0297	AF	negative
										A64_Methanobacterium	F393_unidentified	-0.7764	0.0495	AF	negative
										A42_Methanosarcina	F1004_o_NA	0.6453	0.0137	AF	positive
										A42_Methanosarcina	B109_Syntrophobacter	0.6516	0.0395	AB	positive
										A42_Methanosarcina	B10538_uncultured bacterium	0.6134	0.005	AB	positive
										A42_Methanosarcina	F6062_o_NA	0.6449	0.005	AF	positive
										A66_Methanosaeta	A416_uncultured euryarchaeote	0.81	0.005	A	positive
										A66_Methanosaeta	B6377_uncultured prokaryote	0.7224	0.005	AB	positive
										A66_Methanosaeta	F4787_o_NA	0.643	0.005	AF	positive
										A8_Methanobacterium	B4254_uncultured	-0.6598	0.0198	AB	negative
										A66_Methanosaeta	B1587_Anaerolinea	0.6734	0.005	AB	positive
										A113_Methanosarcina	F6554_o_NA	0.6142	0.0433	AF	positive
										A61_Methanosaeta	F6554_o_NA	0.6546	0.005	AF	positive
										A93_Methanosarcina	F3013_unidentified	0.6328	0.0137	AF	positive
										A10_Methanosaeta	F1145_o_NA	0.6011	0.0495	AF	positive
										A144_Methanobacterium	B4094_uncultured Caldilineae bacterium	0.7394	0.005	AB	positive
										A42_Methanosarcina	B4094_uncultured Caldilineae bacterium	0.8093	0.005	AB	positive
										A144_Methanobacterium	B11255_f_Polyangiaceae	0.604	0.0433	AB	positive
										A42_Methanosarcina	B11255_f_Polyangiaceae	0.6105	0.0334	AB	positive
										A93_Methanosarcina	B2911_o_NA	0.6509	0.0137	AB	positive
										A66_Methanosaeta	B4209_uncultured	0.6678	0.0334	AB	positive
										A66_Methanosaeta	B4531_uncultured	0.6392	0.0137	AB	positive
										A113_Methanosarcina	B6877_anaerobic bacterium MO-CFX2	0.6959	0.005	AB	positive
										A61_Methanosaeta	B6877_anaerobic bacterium MO-CFX2	0.6749	0.005	AB	positive
										A66_Methanosaeta	B6082_f_Clostridiaceae 1	0.7271	0.0137	AB	positive
										A113_Methanosarcina	A689_uncultured bacterium	0.7223	0.0137	A	positive
										A61_Methanosaeta	A689_uncultured bacterium	0.7269	0.005	A	positive
										A93_Methanosarcina	B4434_Chthonomonas	0.6616	0.0137	AB	positive
										A93_Methanosarcina	B2408_uncultured soil bacterium PBS-III-30	0.6292	0.0289	AB	positive
										A12_Methanobacterium	F478_unidentified	0.6678	0.0198	AF	positive
										A4_Methanosaeta	F84_o_NA	0.7445	0.0297	AF	positive
										A66_Methanosaeta	B4210_Candidatus Competibacter	0.6963	0.0137	AB	positive
										A144_Methanobacterium	B1444_Aquicella	0.6286	0.0137	AB	positive
										A42_Methanosarcina	B1444_Aquicella	0.6399	0.005	AB	positive
										A66_Methanosaeta	F3016_unidentified	0.6765	0.0137	AF	positive
										A115_Methanocella	A451_uncultured archaeon	0.6767	0.0137	A	positive
										A125_Methanosaeta	A451_uncultured archaeon	0.603	0.005	A	positive
										A10_Methanosaeta	F2631_unidentified	0.7519	0.0197	AF	positive
										A10_Methanosaeta	B2258_uncultured bacterium	0.6925	0.0098	AB	positive
										A115_Methanocella	A376_uncultured archaeon	0.7784	0.0235	A	positive
										A125_Methanosaeta	A376_uncultured archaeon	0.7447	0.0137	A	positive
										A66_Methanosaeta	B5757_o_NA	0.6683	0.0137	AB	positive
										A64_Methanobacterium	B6058_metagenome	0.7218	0.005	AB	positive
										A12_Methanobacterium	F2104_o_NA	-0.6349	0.0198	AF	negative
										A64_Methanobacterium	B4740_f_Syntrophobacteraceae	0.7078	0.005	AB	positive
										A113_Methanosarcina	F2152_unidentified	0.7744	0.0137	AF	positive
										A8_Methanobacterium	F2152_unidentified	-0.6011	0.0396	AF	negative
										A61_Methanosaeta	F2152_unidentified	0.788	0.0137	AF	positive
										A113_Methanosarcina	B2993_uncultured	0.6797	0.0235	AB	positive
										A61_Methanosaeta	B2993_uncultured	0.6939	0.0235	AB	positive
										A113_Methanosarcina	F3921_unidentified	0.6038	0.0137	AF	positive
										A61_Methanosaeta	F3921_unidentified	0.641	0.005	AF	positive
										A144_Methanobacterium	B1212_uncultured bacterium	0.6147	0.0235	AB	positive
										A42_Methanosarcina	B1212_uncultured bacterium	0.6373	0.005	AB	positive
										A64_Methanobacterium	B1403_Anaeromyxobacter	0.6643	0.0334	AB	positive
										A21_Methanosarcina	B1723_o_NA	-0.6352	0.0198	AB	negative
										A66_Methanosaeta	B1723_o_NA	-0.8664	0.0396	AB	negative
										A21_Methanosarcina	F421_o_NA	-0.653	0.0495	AF	negative
										A44_Methanosaeta	F421_o_NA	-0.6547	0.0495	AF	negative
										A113_Methanosarcina	F242_o_NA	0.7571	0.0396	AF	positive
										A61_Methanosaeta	F242_o_NA	0.7824	0.0198	AF	positive
										A66_Methanosaeta	F4225_unidentified	0.6233	0.0137	AF	positive
										A113_Methanosarcina	B5411_uncultured Gemmatimonadetes bacterium	0.677	0.0235	AB	positive
										A61_Methanosaeta	B5411_uncultured Gemmatimonadetes bacterium	0.704	0.005	AB	positive
										A93_Methanosarcina	A322_o_NA	0.7649	0.005	A	positive
										A115_Methanocella	F514_unidentified	0.6378	0.0137	AF	positive
										A125_Methanosaeta	F514_unidentified	0.6003	0.0137	AF	positive
										A64_Methanobacterium	B7367_o_1013-28-CG33	0.63	0.005	AB	positive
										A12_Methanobacterium	F4062_unidentified	-0.6476	0.0099	AF	negative
										A4_Methanosaeta	B778_uncultured Caldilineaceae bacterium	0.825	0.0198	AB	positive
										A4_Methanosaeta	F1018_unidentified	-0.6041	0.0396	AF	negative
										A66_Methanosaeta	F633_o_NA	0.7231	0.005	AF	positive
										A113_Methanosarcina	F4612_unidentified	0.6021	0.0235	AF	positive
										A44_Methanosaeta	F493_o_NA	0.6989	0.0296	AF	positive
										A8_Methanobacterium	F180_unidentified	-0.6707	0.0495	AF	negative
										A64_Methanobacterium	B11606_Fimbriiglobus	0.6317	0.005	AB	positive
										A42_Methanosarcina	B5735_Paenibacillus	0.6112	0.0334	AB	positive
										A93_Methanosarcina	B3538_uncultured soil bacterium	0.6636	0.0137	AB	positive
										A144_Methanobacterium	F150_Cyphellophora	0.6548	0.0395	AF	positive
										A8_Methanobacterium	F150_Cyphellophora	-0.7438	0.0396	AF	negative
										A42_Methanosarcina	F150_Cyphellophora	0.633	0.0098	AF	positive
										A144_Methanobacterium	F1040_o_NA	0.6074	0.0235	AF	positive
										A42_Methanosarcina	F1040_o_NA	0.7297	0.005	AF	positive
										A113_Methanosarcina	B10359_o_S085	0.6111	0.005	AB	positive
										A61_Methanosaeta	B10359_o_S085	0.6394	0.0137	AB	positive
										A64_Methanobacterium	A136_o_NA	0.7189	0.0235	A	positive
										A44_Methanosaeta	B406_uncultured prokaryote	0.7896	0.0098	AB	positive
										A42_Methanosarcina	B12917_uncultured	0.6477	0.005	AB	positive
										A44_Methanosaeta	F328_unidentified	-0.6421	0.0396	AF	negative
										A64_Methanobacterium	F328_unidentified	-0.7831	0.0495	AF	negative
										A44_Methanosaeta	F11_unidentified	0.6172	0.0396	AF	positive
										A113_Methanosarcina	B7823_Aquicella	0.6095	0.0334	AB	positive
										A44_Methanosaeta	A358_o_NA	0.7733	0.0098	A	positive
										A19_Methanocella	B1879_uncultured bacterium	0.7681	0.0098	AB	positive
										A42_Methanosarcina	B5688_f_WD2101 soil group	0.6381	0.0137	AB	positive
										A44_Methanosaeta	A368_o_NA	0.6125	0.0289	A	positive
										A8_Methanobacterium	F865_o_NA	-0.6646	0.0099	AF	negative
										A10_Methanosaeta	B318_uncultured bacterium SJA-22	0.7139	0.0297	AB	positive
										A44_Methanosaeta	F35_o_Agaricales	-0.6407	0.0495	AF	negative
										A12_Methanobacterium	B5797_Kouleothrix	-0.6711	0.0099	AB	negative
										A21_Methanosarcina	F137_o_NA	-0.6384	0.0198	AF	negative
										A64_Methanobacterium	F137_o_NA	-0.7538	0.0198	AF	negative
										A93_Methanosarcina	F1730_Setophoma	0.6028	0.0137	AF	positive
										A115_Methanocella	A1015_uncultured euryarchaeote	0.6588	0.0137	A	positive
										A125_Methanosaeta	A1015_uncultured euryarchaeote	0.6759	0.0137	A	positive
										A113_Methanosarcina	B5902_uncultured bacterium mle1-16	0.6702	0.005	AB	positive
										A61_Methanosaeta	B5902_uncultured bacterium mle1-16	0.7125	0.0137	AB	positive
										A93_Methanosarcina	F807_unidentified	0.7146	0.0091	AF	positive
										A36_Methanosarcina	F103_o_NA	0.6911	0.0198	AF	positive
										A10_Methanosaeta	B281_uncultured Gemmatimonadetes bacterium	0.6123	0.0396	AB	positive
										A115_Methanocella	F384_Glaciozyma	-0.6093	0.0297	AF	negative
										A125_Methanosaeta	F384_Glaciozyma	-0.6167	0.0396	AF	negative
										A144_Methanobacterium	F558_unidentified	-0.7248	0.0099	AF	negative
										A42_Methanosarcina	F558_unidentified	-0.7549	0.0297	AF	negative
										A64_Methanobacterium	A453_uncultured euryarchaeote	0.7166	0.0334	A	positive
										A64_Methanobacterium	F1109_unidentified	-0.6017	0.0495	AF	negative
										A36_Methanosarcina	B4213_o_NA	0.6672	0.0495	AB	positive
										A115_Methanocella	B5151_uncultured Acidobacterium sp.	0.6642	0.0433	AB	positive
										A125_Methanosaeta	B5151_uncultured Acidobacterium sp.	0.6936	0.0137	AB	positive
										A115_Methanocella	A1107_uncultured euryarchaeote	0.6219	0.0334	A	positive
										A125_Methanosaeta	A1107_uncultured euryarchaeote	0.604	0.0137	A	positive
										A115_Methanocella	B445_uncultured Archangiaceae bacterium	0.6209	0.005	AB	positive
										A42_Methanosarcina	F1041_unidentified	0.605	0.0137	AF	positive
										A115_Methanocella	B10548_f_Burkholderiaceae	0.6044	0.005	AB	positive
										A115_Methanocella	B4131_Methylotenera	0.6406	0.005	AB	positive
										A125_Methanosaeta	B4131_Methylotenera	0.633	0.005	AB	positive
										A8_Methanobacterium	B825_Ignavibacterium	-0.6813	0.0198	AB	negative
										A64_Methanobacterium	B1101_uncultured	0.6455	0.0137	AB	positive
										A115_Methanocella	B735_Anaeromyxobacter	0.7273	0.0235	AB	positive
										A125_Methanosaeta	B735_Anaeromyxobacter	0.6842	0.005	AB	positive
										A113_Methanosarcina	B3346_uncultured	0.6196	0.0137	AB	positive
										A61_Methanosaeta	B3346_uncultured	0.6825	0.005	AB	positive
										A115_Methanocella	B1516_o_NA	0.7088	0.005	AB	positive
										A125_Methanosaeta	B1516_o_NA	0.6991	0.0137	AB	positive
										A44_Methanosaeta	B205_uncultured	0.6432	0.0198	AB	positive
										A21_Methanosarcina	B932_uncultured	0.7806	0.0098	AB	positive
										A66_Methanosaeta	B6681_f_0319-6G20	0.6726	0.0137	AB	positive
										A113_Methanosarcina	A72_uncultured crenarchaeote	0.839	0.0137	A	positive
										A8_Methanobacterium	A72_uncultured crenarchaeote	-0.6162	0.0396	A	negative
										A61_Methanosaeta	A72_uncultured crenarchaeote	0.8402	0.005	A	positive
										A8_Methanobacterium	B1704_Hymenobacter	-0.6524	0.0297	AB	negative
										A144_Methanobacterium	B23_uncultured	-0.8128	0.0297	AB	negative
										A42_Methanosarcina	B23_uncultured	-0.9133	0.0099	AB	negative
										A115_Methanocella	B2213_Ruminiclostridium 1	0.6606	0.005	AB	positive
										A125_Methanosaeta	B2213_Ruminiclostridium 1	0.6227	0.0137	AB	positive
										A144_Methanobacterium	B560_uncultured	0.6537	0.0091	AB	positive
										A42_Methanosarcina	B560_uncultured	0.6287	0.0388	AB	positive
										A64_Methanobacterium	B232_o_NA	0.6811	0.005	AB	positive
										A64_Methanobacterium	B1475_uncultured bacterium	0.6641	0.0137	AB	positive
										A64_Methanobacterium	B507_Bryobacter	0.6853	0.0137	AB	positive
										A66_Methanosaeta	B5182_Sh765B-TzT-35	0.6701	0.0137	AB	positive
										A36_Methanosarcina	B2158_uncultured bacterium	0.6141	0.0099	AB	positive
										A64_Methanobacterium	B466_Desulfobacca	0.6638	0.005	AB	positive
										A36_Methanosarcina	B72_Desulfobacca	0.7325	0.0297	AB	positive
										A64_Methanobacterium	B749_Thiobacillus	0.631	0.0235	AB	positive
										A115_Methanocella	B1432_f_Burkholderiaceae	0.7734	0.0137	AB	positive
										A125_Methanosaeta	B1432_f_Burkholderiaceae	0.7347	0.005	AB	positive
										A21_Methanosarcina	B166_uncultured bacterium	0.6358	0.0396	AB	positive
										A4_Methanosaeta	B166_uncultured bacterium	-0.7436	0.0099	AB	negative
										A66_Methanosaeta	B435_Geobacter	0.7337	0.0137	AB	positive
										A115_Methanocella	B2544_f_Clostridiaceae 1	0.6464	0.0137	AB	positive
										A125_Methanosaeta	B2544_f_Clostridiaceae 1	0.676	0.0433	AB	positive
										A93_Methanosarcina	B4859_f_Clostridiaceae 1	0.7812	0.0137	AB	positive
										A19_Methanocella	B4561_uncultured soil bacterium	0.7713	0.0098	AB	positive
										A64_Methanobacterium	B1232_f_Burkholderiaceae	0.6762	0.0433	AB	positive
										A64_Methanobacterium	B419_uncultured Desulfuromonadales bacterium	0.6808	0.0137	AB	positive
										A61_Methanosaeta	B846_Acidovorax	0.8097	0.0137	AB	positive
										A144_Methanobacterium	B1449_f_Rhodocyclaceae	0.6502	0.005	AB	positive
										A42_Methanosarcina	B1449_f_Rhodocyclaceae	0.6676	0.0137	AB	positive
										A36_Methanosarcina	B1273_Haliangium	0.6485	0.0396	AB	positive
										A113_Methanosarcina	B3111_Ferruginibacter	0.7304	0.0137	AB	positive
										A61_Methanosaeta	B3111_Ferruginibacter	0.7483	0.0235	AB	positive
										A115_Methanocella	B4824_Lacunisphaera	0.6432	0.005	AB	positive
										A113_Methanosarcina	B4183_Bacillus	0.6682	0.0137	AB	positive
										A61_Methanosaeta	B4183_Bacillus	0.6897	0.005	AB	positive
										A125_Methanosaeta	B1252_Agromyces	0.6077	0.0235	AB	positive
										A113_Methanosarcina	B2137_o_NA	0.7081	0.0137	AB	positive
										A61_Methanosaeta	B2137_o_NA	0.7306	0.005	AB	positive
										A93_Methanosarcina	B1883_Rhodanobacter	0.756	0.005	AB	positive
										A64_Methanobacterium	B1083_Dinghuibacter	0.6855	0.0137	AB	positive
										A144_Methanobacterium	B5040_uncultured	0.6248	0.0433	AB	positive
										A42_Methanosarcina	B5040_uncultured	0.6807	0.0235	AB	positive
										A61_Methanosaeta	B271_Anaerolinea	-0.603	0.0297	AB	negative
										A66_Methanosaeta	B306_uncultured	0.6002	0.0137	AB	positive
										A44_Methanosaeta	B668_o_NA	0.6126	0.0495	AB	positive
										A144_Methanobacterium	B2669_uncultured alpha proteobacterium	0.6275	0.0137	AB	positive
										A42_Methanosarcina	B2669_uncultured alpha proteobacterium	0.6369	0.0235	AB	positive
										A42_Methanosarcina	B242_Nakamurella	0.6199	0.0289	AB	positive
										A8_Methanobacterium	B1624_o_uncultured	-0.6376	0.0198	AB	negative
										A66_Methanosaeta	B790_uncultured Sphingobacteriales bacterium	0.7358	0.0137	AB	positive
										A113_Methanosarcina	B8629_Methylocaldum	0.6085	0.0235	AB	positive
										A61_Methanosaeta	B8629_Methylocaldum	0.637	0.005	AB	positive
										A113_Methanosarcina	B4272_[Aquaspirillum] arcticum group	0.7627	0.005	AB	positive
										A61_Methanosaeta	B4272_[Aquaspirillum] arcticum group	0.7728	0.005	AB	positive
										A42_Methanosarcina	B2072_uncultured organism	0.6427	0.0137	AB	positive
										A44_Methanosaeta	B2046_o_NA	0.6427	0.0198	AB	positive
										A115_Methanocella	B1912_o_OPB41	0.7313	0.005	AB	positive
										A125_Methanosaeta	B1912_o_OPB41	0.7109	0.0137	AB	positive
										A44_Methanosaeta	F1242_o_NA	-0.7078	0.0297	AF	negative
										A115_Methanocella	B909_o_uncultured	0.6506	0.0137	AB	positive
										A125_Methanosaeta	B909_o_uncultured	0.6259	0.0235	AB	positive
										A64_Methanobacterium	B953_o_NA	0.733	0.005	AB	positive
										A115_Methanocella	B5183_uncultured	0.7419	0.005	AB	positive
										A125_Methanosaeta	B5183_uncultured	0.6418	0.0235	AB	positive
										A66_Methanosaeta	B1377_Flavobacterium	0.7338	0.005	AB	positive
										A64_Methanobacterium	B1532_Syntrophus	0.6256	0.0334	AB	positive
										A42_Methanosarcina	B4087_Clostridium sensu stricto 12	0.6361	0.0334	AB	positive
										A44_Methanosaeta	B1473_Pir2 lineage	0.6575	0.0098	AB	positive
										A8_Methanobacterium	B13_Methylocystis	-0.6297	0.0396	AB	negative
										A66_Methanosaeta	B43_Pseudolabrys	0.7468	0.0137	AB	positive
										A144_Methanobacterium	B437_Haliangium	0.7329	0.0235	AB	positive
										A42_Methanosarcina	B437_Haliangium	0.7549	0.0137	AB	positive
										A93_Methanosarcina	B176_Phenylobacterium	0.7348	0.0137	AB	positive
										A93_Methanosarcina	B1065_Geobacter	0.7758	0.0137	AB	positive
										A113_Methanosarcina	B632_Haliangium	0.7539	0.0137	AB	positive
										A8_Methanobacterium	B632_Haliangium	-0.613	0.0495	AB	negative
										A61_Methanosaeta	B632_Haliangium	0.7327	0.0137	AB	positive
										A113_Methanosarcina	B725_uncultured	0.6058	0.0137	AB	positive
										A61_Methanosaeta	B725_uncultured	0.6305	0.005	AB	positive
										A113_Methanosarcina	B3286_uncultured bacterium	0.6106	0.0137	AB	positive
										A61_Methanosaeta	B3286_uncultured bacterium	0.6316	0.0433	AB	positive
										A115_Methanocella	B144_f_Xanthobacteraceae	0.7534	0.0137	AB	positive
										A125_Methanosaeta	B144_f_Xanthobacteraceae	0.7488	0.0235	AB	positive
										A44_Methanosaeta	B112_Massilia	-0.7162	0.0297	AB	negative
										A64_Methanobacterium	B8149_uncultured Pedosphaera sp.	0.6207	0.0137	AB	positive
										A12_Methanobacterium	B299_uncultured	-0.6647	0.0099	AB	negative
										A115_Methanocella	B1197_anaerobic bacterium MO-CFX2	0.6412	0.0235	AB	positive
										A66_Methanosaeta	B3864_metagenome	0.6008	0.005	AB	positive
										A113_Methanosarcina	B3517_Nocardioides	0.7311	0.0137	AB	positive
										A61_Methanosaeta	B3517_Nocardioides	0.752	0.0137	AB	positive
										A66_Methanosaeta	B3064_Subgroup 10	0.6737	0.005	AB	positive
										A19_Methanocella	B1135_Ellin6067	0.6124	0.019	AB	positive
										A12_Methanobacterium	A224_Candidatus Nitrosotenuis	-0.8229	0.0099	A	negative
										A8_Methanobacterium	B822_uncultured Termite group 1 bacterium	0.8897	0.0099	AB	positive
										A144_Methanobacterium	B513_Gemmatimonas	0.7132	0.0334	AB	positive
										A8_Methanobacterium	B513_Gemmatimonas	-0.6077	0.0495	AB	negative
										A42_Methanosarcina	B513_Gemmatimonas	0.758	0.005	AB	positive
										A4_Methanosaeta	B647_uncultured	0.6854	0.0099	AB	positive
										A64_Methanobacterium	B2746_Gaiella	0.6809	0.0334	AB	positive
										B213_f_SC-I-84	A113_Methanosarcina	-0.8704	0.0099	AB	negative
										B4645_o_SAR202 clade	A113_Methanosarcina	0.6266	0.0235	AB	positive
										A491_o_NA	A113_Methanosarcina	0.7385	0.0137	A	positive
										B3548_f_WD2101 soil group	A113_Methanosarcina	0.619	0.0137	AB	positive
										B429_uncultured bacterium DA038	A113_Methanosarcina	0.6767	0.005	AB	positive
										B273_uncultured bacterium	A113_Methanosarcina	-0.8894	0.0198	AB	negative
										F319_unidentified	A113_Methanosarcina	0.6752	0.0091	AF	positive
										B9172_f_Rhizobiaceae	A113_Methanosarcina	0.6667	0.005	AB	positive
										F163_o_NA	A113_Methanosarcina	-0.6045	0.0396	AF	negative
										B4637_uncultured Acidobacterium sp.	A113_Methanosarcina	0.702	0.0334	AB	positive
										B5156_uncultured Archangiaceae bacterium	A113_Methanosarcina	0.7182	0.005	AB	positive
										F4274_o_NA	A113_Methanosarcina	0.6684	0.0137	AF	positive
										B357_o_NA	A113_Methanosarcina	0.6166	0.0235	AB	positive
										B1690_Candidatus Koribacter	A113_Methanosarcina	0.7191	0.0235	AB	positive
										A362_uncultured archaeon	A113_Methanosarcina	0.6186	0.0137	A	positive
										F1389_o_NA	A113_Methanosarcina	0.6677	0.005	AF	positive
										B1601_uncultured proteobacterium	A113_Methanosarcina	0.6259	0.0235	AB	positive
										B173_ADurb.Bin063-1	A113_Methanosarcina	0.7949	0.005	AB	positive
										B238_f_uncultured	A113_Methanosarcina	0.7654	0.0334	AB	positive
										B1080_Sphingomonas	A113_Methanosarcina	0.8069	0.005	AB	positive
										B322_o_SJA-15	A113_Methanosarcina	0.7243	0.0334	AB	positive
										B3105_uncultured bacterium	A113_Methanosarcina	0.6269	0.0235	AB	positive
										B732_o_Sva0485	A113_Methanosarcina	0.7286	0.005	AB	positive
										F1278_o_NA	A113_Methanosarcina	0.6198	0.019	AF	positive
										A8_Methanobacterium	A113_Methanosarcina	-0.6289	0.0297	A	negative
										B1270_Arenimonas	A113_Methanosarcina	0.7033	0.005	AB	positive
										B914_uncultured Syntrophaceae bacterium	A113_Methanosarcina	0.6689	0.005	AB	positive
										B1439_uncultured	A113_Methanosarcina	0.6124	0.0235	AB	positive
										B7107_OLB12	A113_Methanosarcina	0.6909	0.0137	AB	positive
										B895_Methylotenera	A113_Methanosarcina	0.6504	0.005	AB	positive
										A499_o_NA	A113_Methanosarcina	0.726	0.019	A	positive
										F4285_unidentified	A113_Methanosarcina	0.6562	0.005	AF	positive
										F88_unidentified	A113_Methanosarcina	-0.8856	0.0198	AF	negative
										A412_uncultured archaeon	A113_Methanosarcina	0.6922	0.0137	A	positive
										A546_uncultured euryarchaeote	A113_Methanosarcina	0.7742	0.005	A	positive
										B34_f_Xanthobacteraceae	A113_Methanosarcina	0.7139	0.0137	AB	positive
										B3688_uncultured	A113_Methanosarcina	0.724	0.0137	AB	positive
										B786_o_CCD24	A113_Methanosarcina	0.6426	0.005	AB	positive
										B8978_Nocardioides	A113_Methanosarcina	0.6318	0.005	AB	positive
										B2980_uncultured	A113_Methanosarcina	0.6027	0.0137	AB	positive
										B4137_Dongia	A113_Methanosarcina	0.6279	0.005	AB	positive
										B2695_Sideroxydans	A113_Methanosarcina	0.6977	0.0235	AB	positive
										B950_f_Blastocatellaceae	A113_Methanosarcina	0.7324	0.005	AB	positive
										B902_Aquisphaera	A113_Methanosarcina	0.6186	0.005	AB	positive
										A18_o_NA	A113_Methanosarcina	0.8407	0.0334	A	positive
										B1925_uncultured prokaryote	A113_Methanosarcina	0.6693	0.0235	AB	positive
										A61_Methanosaeta	A113_Methanosarcina	0.8521	0.005	A	positive
										B1801_uncultured Prosthecobacter sp.	A113_Methanosarcina	0.7397	0.0235	AB	positive
										B2545_uncultured bacterium	A113_Methanosarcina	0.6891	0.0235	AB	positive
										B4179_uncultured bacterium	A113_Methanosarcina	0.6027	0.005	AB	positive
										B4665_o_NA	A113_Methanosarcina	0.7174	0.0433	AB	positive
										B515_o_Subgroup 7	A113_Methanosarcina	0.689	0.0137	AB	positive
										B1413_Subgroup 10	A113_Methanosarcina	0.7282	0.0334	AB	positive
										B1415_Desulfobulbus	A113_Methanosarcina	0.6059	0.005	AB	positive
										B1115_uncultured prokaryote	A113_Methanosarcina	0.708	0.0137	AB	positive
										B39_f_Burkholderiaceae	A113_Methanosarcina	0.6031	0.0388	AB	positive
										B3981_f_Solibacteraceae (Subgroup 3)	A113_Methanosarcina	0.712	0.0137	AB	positive
										B5791_o_NA	A113_Methanosarcina	0.734	0.005	AB	positive
										B874_f_uncultured	A113_Methanosarcina	0.6559	0.0395	AB	positive
										B492_Arenimonas	A113_Methanosarcina	0.6717	0.0235	AB	positive
										B480_Desulfobacca	A113_Methanosarcina	0.6791	0.005	AB	positive
										B7531_uncultured prokaryote	A113_Methanosarcina	0.7161	0.005	AB	positive
										B5032_f_Clostridiaceae 1	A113_Methanosarcina	0.672	0.005	AB	positive
										B7393_Plot4-2H12	A113_Methanosarcina	0.651	0.005	AB	positive
										B336_o_NA	A113_Methanosarcina	0.7515	0.0137	AB	positive
										B768_uncultured proteobacterium	A113_Methanosarcina	0.6778	0.005	AB	positive
										B6900_Allorhizobium-Neorhizobium-Pararhizobium-Rhizobium	A113_Methanosarcina	0.6434	0.0235	AB	positive
										B11023_f_uncultured	A113_Methanosarcina	0.6093	0.0235	AB	positive
										B233_Geobacter	A113_Methanosarcina	0.7454	0.0334	AB	positive
										B356_f_P3OB-42	A113_Methanosarcina	0.7499	0.005	AB	positive
										B568_o_Gaiellales	A113_Methanosarcina	0.7331	0.005	AB	positive
										B2118_f_Kineosporiaceae	A113_Methanosarcina	0.6719	0.0091	AB	positive
										A90_uncultured archaeon VC2.1 Arc31	A113_Methanosarcina	0.6965	0.005	A	positive
										B2274_Candidatus Solibacter	A113_Methanosarcina	0.7629	0.005	AB	positive
										B4261_f_Ilumatobacteraceae	A113_Methanosarcina	0.6256	0.005	AB	positive
										B3444_f_Rhodocyclaceae	A113_Methanosarcina	0.7657	0.0137	AB	positive
										A597_uncultured	A113_Methanosarcina	0.7909	0.0137	A	positive
										A50_Candidatus Methanoperedens	A113_Methanosarcina	0.8571	0.0137	A	positive
										B1239_Syntrophus	A113_Methanosarcina	0.6926	0.0137	AB	positive
										B2668_Dokdonella	A113_Methanosarcina	0.6971	0.005	AB	positive
										A264_Candidatus Diapherotrites archaeon ADurb.Bin253	A113_Methanosarcina	0.7279	0.0137	A	positive
										F70_Mortierella	A113_Methanosarcina	-0.8563	0.0198	AF	negative
										F709_Dioszegia	A113_Methanosarcina	0.6215	0.0388	AF	positive
										F193_unidentified	A113_Methanosarcina	-0.839	0.0099	AF	negative
										F10_Mrakia	A113_Methanosarcina	0.6012	0.0495	AF	positive
										F219_unidentified	A113_Methanosarcina	0.7708	0.0137	AF	positive
										F347_Filobasidium	A113_Methanosarcina	0.6849	0.019	AF	positive
										A64_Methanobacterium	B7019_f_Ruminococcaceae	0.6751	0.005	AB	positive
										A66_Methanosaeta	B4134_Methylobacter	0.6982	0.0334	AB	positive
										A12_Methanobacterium	B3263_uncultured Chloroflexus sp.	-0.757	0.0099	AB	negative
										A8_Methanobacterium	B1378_Rhodobacter	0.7022	0.0396	AB	positive
										A64_Methanobacterium	B1333_bacterium Ellin516	0.6931	0.0137	AB	positive
										A61_Methanosaeta	B213_f_SC-I-84	-0.9031	0.0297	AB	negative
										A93_Methanosarcina	B4756_f_uncultured	0.6505	0.0137	AB	positive
										A93_Methanosarcina	B1494_f_Pedosphaeraceae	0.6913	0.0235	AB	positive
										A64_Methanobacterium	B9094_uncultured bacterium	0.6524	0.0235	AB	positive
										A66_Methanosaeta	B8633_uncultured bacterium	0.6216	0.0334	AB	positive
										A64_Methanobacterium	F3681_o_NA	0.6652	0.0433	AF	positive
										A64_Methanobacterium	B4273_uncultured Anaerolineaceae bacterium	0.6014	0.0433	AB	positive
										A61_Methanosaeta	B4645_o_SAR202 clade	0.6344	0.005	AB	positive
										A64_Methanobacterium	F590_unidentified	-0.7739	0.0297	AF	negative
										A115_Methanocella	A1022_uncultured archaeon	0.6622	0.005	A	positive
										A125_Methanosaeta	A1022_uncultured archaeon	0.6226	0.0433	A	positive
										A10_Methanosaeta	B2768_anaerobic bacterium MO-CFX2	0.6127	0.0297	AB	positive
										A10_Methanosaeta	F484_Mortierella	0.7214	0.0198	AF	positive
										A64_Methanobacterium	A112_o_NA	0.73	0.0334	A	positive
										A44_Methanosaeta	B866_o_KI89A clade	0.6019	0.0098	AB	positive
										A144_Methanobacterium	F3833_o_NA	0.631	0.0137	AF	positive
										A42_Methanosarcina	F3833_o_NA	0.6235	0.005	AF	positive
										A66_Methanosaeta	B3418_o_Chthonomonadales	0.702	0.0235	AB	positive
										A61_Methanosaeta	A491_o_NA	0.7401	0.005	A	positive
										A61_Methanosaeta	B3548_f_WD2101 soil group	0.644	0.0137	AB	positive
										A19_Methanocella	F309_o_NA	0.6088	0.0289	AF	positive
										A61_Methanosaeta	F1262_o_NA	0.6437	0.0137	AF	positive
										A115_Methanocella	B462_f_Anaerolineaceae	0.7216	0.005	AB	positive
										A125_Methanosaeta	B462_f_Anaerolineaceae	0.6328	0.0433	AB	positive
										A4_Methanosaeta	B1169_o_NA	-0.6033	0.0198	AB	negative
										A44_Methanosaeta	F206_o_NA	-0.6851	0.0495	AF	negative
										A19_Methanocella	F1144_unidentified	0.6686	0.0396	AF	positive
										A64_Methanobacterium	F402_o_NA	-0.6464	0.0297	AF	negative
										A19_Methanocella	B6888_f_Pedosphaeraceae	0.6612	0.0197	AB	positive
										A144_Methanobacterium	F313_unidentified	0.6081	0.0235	AF	positive
										A42_Methanosarcina	F313_unidentified	0.6264	0.005	AF	positive
										A61_Methanosaeta	B429_uncultured bacterium DA038	0.6892	0.0235	AB	positive
										A93_Methanosarcina	B15622_uncultured soil bacterium	0.6104	0.005	AB	positive
										A44_Methanosaeta	B977_Ignavibacterium	0.8042	0.0098	AB	positive
										A93_Methanosarcina	F3367_o_NA	0.626	0.0433	AF	positive
										A93_Methanosarcina	F528_o_NA	-0.8247	0.0099	AF	negative
										A115_Methanocella	B10476_Desulfatiglans	0.657	0.005	AB	positive
										A125_Methanosaeta	B10476_Desulfatiglans	0.6406	0.005	AB	positive
										A12_Methanobacterium	F165_o_NA	0.7283	0.0198	AF	positive
										A66_Methanosaeta	A1026_uncultured archaeon	0.617	0.0137	A	positive
										A93_Methanosarcina	B4320_uncultured Chlorobi bacterium	0.6079	0.0137	AB	positive
										A93_Methanosarcina	B6856_uncultured bacterium	0.6517	0.0334	AB	positive
										A42_Methanosarcina	F1110_o_NA	0.6246	0.0137	AF	positive
										A61_Methanosaeta	B273_uncultured bacterium	-0.9049	0.0198	AB	negative
										A64_Methanobacterium	B9788_f_uncultured	0.6123	0.0137	AB	positive
										A61_Methanosaeta	F319_unidentified	0.6501	0.0388	AF	positive
										A66_Methanosaeta	F3274_o_NA	0.6011	0.0137	AF	positive
										A144_Methanobacterium	F649_unidentified	0.7165	0.005	AF	positive
										A42_Methanosarcina	F649_unidentified	0.7267	0.0137	AF	positive
										A8_Methanobacterium	F572_o_NA	-0.6982	0.0297	AF	negative
										A64_Methanobacterium	F1253_o_NA	-0.8646	0.0198	AF	negative
										A44_Methanosaeta	B481_Desulfomonile	0.6492	0.0297	AB	positive
										A66_Methanosaeta	B1996_f_Burkholderiaceae	0.7449	0.0137	AB	positive
										A93_Methanosarcina	B2264_f_Rhodocyclaceae	0.6087	0.019	AB	positive
										A36_Methanosarcina	A67_unidentified archaeon	0.6895	0.0198	A	positive
										A64_Methanobacterium	B3228_Devosia	0.695	0.0137	AB	positive
										A61_Methanosaeta	B9172_f_Rhizobiaceae	0.6221	0.005	AB	positive
										A144_Methanobacterium	F1026_o_NA	0.6024	0.0235	AF	positive
										A42_Methanosarcina	F1026_o_NA	0.6216	0.0334	AF	positive
										A144_Methanobacterium	F499_o_NA	0.6635	0.005	AF	positive
										A42_Methanosarcina	F499_o_NA	0.6281	0.0137	AF	positive
										A93_Methanosarcina	B1220_o_Subgroup 7	0.7148	0.005	AB	positive
										A93_Methanosarcina	B6921_f_Ruminococcaceae	0.6781	0.0137	AB	positive
										A66_Methanosaeta	F4658_unidentified	0.6725	0.0137	AF	positive
										A115_Methanocella	B1316_Subgroup 10	0.6279	0.0235	AB	positive
										A125_Methanosaeta	B1316_Subgroup 10	0.6367	0.0137	AB	positive
										A12_Methanobacterium	F2329_o_NA	-0.7758	0.0198	AF	negative
										A61_Methanosaeta	F163_o_NA	-0.6476	0.0297	AF	negative
										A144_Methanobacterium	B4924_uncultured archaeon	0.6191	0.005	AB	positive
										A42_Methanosarcina	B4924_uncultured archaeon	0.6317	0.0235	AB	positive
										A10_Methanosaeta	B3269_uncultured Caldilineaceae bacterium	0.6223	0.0297	AB	positive
										A19_Methanocella	F1427_o_NA	0.6831	0.0396	AF	positive
										A66_Methanosaeta	F2136_o_NA	0.7299	0.005	AF	positive
										A61_Methanosaeta	B4637_uncultured Acidobacterium sp.	0.7144	0.005	AB	positive
										A19_Methanocella	F230_unidentified	-0.6749	0.0495	AF	negative
										A115_Methanocella	B5045_f_Pedosphaeraceae	0.717	0.0137	AB	positive
										A125_Methanosaeta	B5045_f_Pedosphaeraceae	0.7057	0.0137	AB	positive
										A93_Methanosarcina	B33_uncultured	-0.6389	0.0495	AB	negative
										A42_Methanosarcina	B10383_Desulfatiglans	0.6378	0.0137	AB	positive
										A93_Methanosarcina	F1526_o_NA	0.7438	0.005	AF	positive
										A36_Methanosarcina	B2042_uncultured bacterium	-0.6557	0.0297	AB	negative
										A144_Methanobacterium	B4376_uncultured bacterium	0.6691	0.005	AB	positive
										A42_Methanosarcina	B4376_uncultured bacterium	0.6717	0.005	AB	positive
										A61_Methanosaeta	B5156_uncultured Archangiaceae bacterium	0.7262	0.005	AB	positive
										A64_Methanobacterium	A631_uncultured archaeon	0.6286	0.0137	A	positive
										A21_Methanosarcina	B1048_anaerobic bacterium MO-CFX2	0.6982	0.0197	AB	positive
										A144_Methanobacterium	B1873_o_NA	0.6189	0.0334	AB	positive
										A42_Methanosarcina	B1873_o_NA	0.6517	0.005	AB	positive
										A61_Methanosaeta	F4274_o_NA	0.696	0.0137	AF	positive
										A44_Methanosaeta	F330_unidentified	-0.6149	0.0495	AF	negative
										A64_Methanobacterium	F330_unidentified	-0.641	0.0396	AF	negative
										A10_Methanosaeta	F330_unidentified	0.6053	0.0396	AF	positive
										A44_Methanosaeta	B134_Pseudolabrys	0.6718	0.0495	AB	positive
										A93_Methanosarcina	B118_Nitrospira	-0.6087	0.0297	AB	negative
										A66_Methanosaeta	B118_Nitrospira	-0.6219	0.0297	AB	negative
										A115_Methanocella	B2937_Methylobacter	0.6862	0.005	AB	positive
										A125_Methanosaeta	B2937_Methylobacter	0.6888	0.005	AB	positive
										A10_Methanosaeta	B701_unidentified	0.6754	0.0297	AB	positive
										A144_Methanobacterium	B10481_uncultured	0.6368	0.005	AB	positive
										A42_Methanosarcina	B10481_uncultured	0.6549	0.005	AB	positive
										A115_Methanocella	B3771_Gaiella	0.6599	0.0137	AB	positive
										A125_Methanosaeta	B3771_Gaiella	0.6798	0.005	AB	positive
										A115_Methanocella	B83_uncultured	0.702	0.019	AB	positive
										A10_Methanosaeta	B83_uncultured	0.7914	0.0098	AB	positive
										A125_Methanosaeta	B83_uncultured	0.6315	0.0487	AB	positive
										A64_Methanobacterium	B125_uncultured	0.6623	0.0235	AB	positive
										A61_Methanosaeta	B357_o_NA	0.6253	0.005	AB	positive
										A66_Methanosaeta	B305_uncultured prokaryote	0.7043	0.0137	AB	positive
										A144_Methanobacterium	A86_Candidatus Methanoperedens	0.7999	0.0137	A	positive
										A8_Methanobacterium	A86_Candidatus Methanoperedens	-0.6096	0.0495	A	negative
										A42_Methanosarcina	A86_Candidatus Methanoperedens	0.8338	0.005	A	positive
										A61_Methanosaeta	B1690_Candidatus Koribacter	0.7742	0.0137	AB	positive
										A93_Methanosarcina	B1934_Bauldia	0.6788	0.0137	AB	positive
										A61_Methanosaeta	B4424_uncultured bacterium	0.6361	0.0235	AB	positive
										A12_Methanobacterium	B1201_o_RBG-13-54-9	-0.6094	0.0297	AB	negative
										A115_Methanocella	B4877_[Desulfobacterium] catecholicum group	0.651	0.005	AB	positive
										A44_Methanosaeta	B4275_JSC-12	0.658	0.0198	AB	positive
										A36_Methanosarcina	B497_uncultured	-0.712	0.0198	AB	negative
										A66_Methanosaeta	B8735_Streptomyces	0.6713	0.0235	AB	positive
										A144_Methanobacterium	B847_Ferruginibacter	0.6781	0.0235	AB	positive
										A42_Methanosarcina	B847_Ferruginibacter	0.8011	0.005	AB	positive
										A61_Methanosaeta	B5471_o_NA	0.6123	0.0433	AB	positive
										A4_Methanosaeta	B15_Thiobacillus	0.6621	0.0396	AB	positive
										A125_Methanosaeta	B15_Thiobacillus	-0.6084	0.0396	AB	negative
										A19_Methanocella	B721_Pseudolabrys	0.61	0.019	AB	positive
										A61_Methanosaeta	A362_uncultured archaeon	0.7031	0.005	A	positive
										A66_Methanosaeta	F1565_o_NA	0.6267	0.005	AF	positive
										A21_Methanosarcina	F1008_o_NA	0.6149	0.0099	AF	positive
										A10_Methanosaeta	B3036_f_uncultured	0.7815	0.0098	AB	positive
										A144_Methanobacterium	B292_f_BSV26	-0.7469	0.0099	AB	negative
										A8_Methanobacterium	B292_f_BSV26	0.66	0.0495	AB	positive
										A42_Methanosarcina	B292_f_BSV26	-0.8191	0.0297	AB	negative
										A10_Methanosaeta	F246_o_NA	-0.7145	0.0198	AF	negative
										A93_Methanosarcina	A338_uncultured archaeon	0.805	0.005	A	positive
										A12_Methanobacterium	B656_o_NA	0.8773	0.0099	AB	positive
										A36_Methanosarcina	B656_o_NA	-0.7101	0.0396	AB	negative
										A144_Methanobacterium	F5465_o_NA	0.6116	0.0334	AF	positive
										A42_Methanosarcina	F5465_o_NA	0.6278	0.005	AF	positive
										A44_Methanosaeta	B163_uncultured Bellilinea sp.	-0.665	0.0297	AB	negative
										A8_Methanobacterium	B1825_uncultured soil bacterium	-0.7466	0.0099	AB	negative
										A8_Methanobacterium	F125_o_Leucosporidiales	0.7606	0.0297	AF	positive
										A21_Methanosarcina	F1020_o_NA	-0.7149	0.0099	AF	negative
										A61_Methanosaeta	F1389_o_NA	0.7114	0.0137	AF	positive
										A36_Methanosarcina	B9632_Herpetosiphon	0.6588	0.0099	AB	positive
										A93_Methanosarcina	F4671_Rhodotorula	0.6654	0.005	AF	positive
										A64_Methanobacterium	B1390_o_NA	0.6887	0.005	AB	positive
										A93_Methanosarcina	A758_o_NA	0.7499	0.0137	A	positive
										A8_Methanobacterium	B1508_f_Pedosphaeraceae	-0.7219	0.0099	AB	negative
										A44_Methanosaeta	B630_Candidatus Solibacter	0.6607	0.0396	AB	positive
										A64_Methanobacterium	B130_uncultured	-0.8168	0.0495	AB	negative
										A36_Methanosarcina	B263_uncultured	0.6667	0.0297	AB	positive
										A61_Methanosaeta	B1601_uncultured proteobacterium	0.6343	0.0235	AB	positive
										A4_Methanosaeta	B120_uncultured Burkholderiaceae bacterium	-0.6302	0.0495	AB	negative
										A12_Methanobacterium	B98_uncultured	0.9427	0.0099	AB	positive
										A36_Methanosarcina	B98_uncultured	-0.7879	0.0099	AB	negative
										A8_Methanobacterium	B1200_Hyphomicrobium	-0.8253	0.0198	AB	negative
										A36_Methanosarcina	B331_f_uncultured	0.8853	0.0099	AB	positive
										A115_Methanocella	B219_uncultured Desulfuromonadales bacterium	0.6963	0.0137	AB	positive
										A125_Methanosaeta	B219_uncultured Desulfuromonadales bacterium	0.6271	0.0235	AB	positive
										A66_Methanosaeta	B1187_uncultured forest soil bacterium	0.6985	0.0137	AB	positive
										A61_Methanosaeta	B173_ADurb.Bin063-1	0.7782	0.0433	AB	positive
										A93_Methanosarcina	B1072_uncultured	0.601	0.005	AB	positive
										A44_Methanosaeta	B94_f_Micropepsaceae	0.6812	0.0297	AB	positive
										A64_Methanobacterium	B101_o_S085	-0.8572	0.0099	AB	negative
										A66_Methanosaeta	B3891_uncultured Acidobacterium sp.	0.6961	0.005	AB	positive
										A8_Methanobacterium	B238_f_uncultured	-0.6093	0.0495	AB	negative
										A61_Methanosaeta	B238_f_uncultured	0.7707	0.005	AB	positive
										A64_Methanobacterium	B2899_f_TRA3-20	0.6463	0.005	AB	positive
										A115_Methanocella	B519_uncultured	0.721	0.0137	AB	positive
										A125_Methanosaeta	B519_uncultured	0.6462	0.0334	AB	positive
										A21_Methanosarcina	B1328_uncultured	0.7405	0.0197	AB	positive
										A21_Methanosarcina	B3163_o_MBNT15	0.6072	0.0099	AB	positive
										A4_Methanosaeta	B139_uncultured Iamiaceae bacterium	0.7236	0.0198	AB	positive
										A66_Methanosaeta	B6747_uncultured Chloroflexus sp.	0.6008	0.0235	AB	positive
										A66_Methanosaeta	B1322_uncultured	0.6149	0.0137	AB	positive
										A93_Methanosarcina	B2682_Candidatus Solibacter	0.7499	0.0137	AB	positive
										A10_Methanosaeta	B783_Gemmatimonas	0.6296	0.0198	AB	positive
										A36_Methanosarcina	A16_Candidatus Nitrocosmicus	-0.7515	0.0396	A	negative
										A36_Methanosarcina	A12_Methanobacterium	-0.7126	0.0198	A	negative
										B5909_Pedobacter	A12_Methanobacterium	-0.7143	0.0198	AB	negative
										F1139_Pseudaleuria	A12_Methanobacterium	-0.7042	0.0396	AF	negative
										B1330_f_Sphingomonadaceae	A12_Methanobacterium	-0.6183	0.0297	AB	negative
										B302_Phycicoccus	A12_Methanobacterium	0.9518	0.0099	AB	positive
										B1680_Ferribacterium	A12_Methanobacterium	-0.8334	0.0099	AB	negative
										B433_Syntrophobacter	A12_Methanobacterium	-0.6729	0.0297	AB	negative
										B8109_uncultured	A12_Methanobacterium	-0.7523	0.0099	AB	negative
										B2603_uncultivated soil bacterium clone C112	A12_Methanobacterium	-0.7195	0.0099	AB	negative
										B631_f_uncultured	A12_Methanobacterium	-0.6549	0.0198	AB	negative
										B62_Mycobacterium	A12_Methanobacterium	-0.6049	0.0495	AB	negative
										B11_f_SC-I-84	A12_Methanobacterium	0.7957	0.0099	AB	positive
										B4089_Dongia	A12_Methanobacterium	-0.7511	0.0099	AB	negative
										B1324_Pirellula	A12_Methanobacterium	-0.7058	0.0099	AB	negative
										B2744_uncultured Nitrospiraceae bacterium	A12_Methanobacterium	-0.6192	0.0198	AB	negative
										B939_Rhodoferax	A12_Methanobacterium	-0.74	0.0297	AB	negative
										B384_UTBCD1	A12_Methanobacterium	-0.854	0.0099	AB	negative
										B2853_Nannocystis	A12_Methanobacterium	-0.6078	0.0099	AB	negative
										B1118_Herminiimonas	A12_Methanobacterium	-0.8746	0.0099	AB	negative
										B383_Massilia	A12_Methanobacterium	-0.7257	0.0099	AB	negative
										B940_Hymenobacter	A12_Methanobacterium	-0.6574	0.0297	AB	negative
										B250_o_NA	A12_Methanobacterium	0.6941	0.0495	AB	positive
										F48_unidentified	A12_Methanobacterium	0.792	0.0396	AF	positive
										F43_Psilocybe	A12_Methanobacterium	-0.6638	0.0297	AF	negative
										F7_Cladosporium	A12_Methanobacterium	0.7012	0.0198	AF	positive
										F23_f_Nectriaceae	A12_Methanobacterium	-0.6499	0.0495	AF	negative
										F491_Sampaiozyma	A12_Methanobacterium	-0.7972	0.0099	AF	negative
										A93_Methanosarcina	B7430_f_Clostridiaceae 1	0.6751	0.0137	AB	positive
										A44_Methanosaeta	B633_o_NA	0.649	0.0289	AB	positive
										A64_Methanobacterium	B4945_uncultured	0.6646	0.0334	AB	positive
										A61_Methanosaeta	B1080_Sphingomonas	0.7729	0.005	AB	positive
										A61_Methanosaeta	B322_o_SJA-15	0.7529	0.0137	AB	positive
										A61_Methanosaeta	B3105_uncultured bacterium	0.613	0.0137	AB	positive
										A4_Methanosaeta	B483_o_Subgroup 7	0.6699	0.0495	AB	positive
										A44_Methanosaeta	B898_Haliangium	0.6005	0.0487	AB	positive
										A36_Methanosarcina	B752_metagenome	0.615	0.0198	AB	positive
										A93_Methanosarcina	B2161_uncultured bacterium DA023	0.6331	0.0235	AB	positive
										A64_Methanobacterium	B674_Subgroup 10	0.6815	0.0137	AB	positive
										B1008_Ellin6067	A93_Methanosarcina	0.7521	0.0137	AB	positive
										B1578_uncultured Desulfovirga sp.	A93_Methanosarcina	0.7333	0.0137	AB	positive
										B85_o_Subgroup 7	A93_Methanosarcina	-0.8695	0.0099	AB	negative
										A97_uncultured archaeon	A93_Methanosarcina	0.6146	0.0235	A	positive
										B2757_uncultured beta proteobacterium	A93_Methanosarcina	0.6492	0.0433	AB	positive
										B3698_wastewater metagenome	A93_Methanosarcina	0.7364	0.0235	AB	positive
										B695_uncultured soil bacterium	A93_Methanosarcina	0.6275	0.0137	AB	positive
										B5221_o_S085	A93_Methanosarcina	0.6918	0.005	AB	positive
										A1136_uncultured euryarchaeote	A93_Methanosarcina	0.6195	0.0137	A	positive
										B1029_f_SC-I-84	A93_Methanosarcina	0.6222	0.005	AB	positive
										B1288_uncultured	A93_Methanosarcina	0.6544	0.0137	AB	positive
										B249_o_Sva0485	A93_Methanosarcina	0.7399	0.0137	AB	positive
										B266_uncultured	A93_Methanosarcina	0.697	0.0235	AB	positive
										B704_Sphingomonas	A93_Methanosarcina	0.6055	0.0289	AB	positive
										B28_Desulfobacca	A93_Methanosarcina	-0.6339	0.0396	AB	negative
										B1318_metagenome	A93_Methanosarcina	0.6815	0.005	AB	positive
										B2345_Pajaroellobacter	A93_Methanosarcina	0.7177	0.0235	AB	positive
										B2576_uncultured	A93_Methanosarcina	0.6027	0.0137	AB	positive
										B2277_o_NA	A93_Methanosarcina	0.6123	0.0137	AB	positive
										B11438_uncultured	A93_Methanosarcina	0.6001	0.0433	AB	positive
										B2835_uncultured	A93_Methanosarcina	0.6523	0.005	AB	positive
										B1129_metagenome	A93_Methanosarcina	0.6229	0.005	AB	positive
										B10309_f_Chitinophagaceae	A93_Methanosarcina	0.65	0.0137	AB	positive
										B2178_Haliangium	A93_Methanosarcina	0.6542	0.0137	AB	positive
										B7069_uncultured	A93_Methanosarcina	0.7052	0.0433	AB	positive
										B5141_Aetherobacter	A93_Methanosarcina	0.6645	0.0235	AB	positive
										B601_f_Nocardioidaceae	A93_Methanosarcina	0.7586	0.0235	AB	positive
										B5912_Nitrospira	A93_Methanosarcina	0.6626	0.0334	AB	positive
										B1014_f_uncultured	A93_Methanosarcina	0.6407	0.0137	AB	positive
										B551_Gaiella	A93_Methanosarcina	0.7408	0.0235	AB	positive
										B6173_uncultured soil bacterium	A93_Methanosarcina	0.6455	0.0137	AB	positive
										B690_uncultured	A93_Methanosarcina	0.6805	0.0137	AB	positive
										B179_Haliangium	A93_Methanosarcina	0.778	0.0137	AB	positive
										B7984_Ohtaekwangia	A93_Methanosarcina	0.6072	0.0235	AB	positive
										B310_Candidatus Koribacter	A93_Methanosarcina	0.757	0.005	AB	positive
										B2063_uncultured Nitrosomonadaceae bacterium	A93_Methanosarcina	0.6444	0.0334	AB	positive
										B3618_Chthoniobacter	A93_Methanosarcina	0.665	0.0433	AB	positive
										B3624_Candidatus Methylospira	A93_Methanosarcina	0.6283	0.0137	AB	positive
										B2949_uncultured delta proteobacterium	A93_Methanosarcina	0.6792	0.0334	AB	positive
										B2317_Gaiella	A93_Methanosarcina	0.7116	0.0235	AB	positive
										B5694_Micromonospora	A93_Methanosarcina	0.7407	0.005	AB	positive
										B6644_f_Fimbriimonadaceae	A93_Methanosarcina	0.6436	0.0137	AB	positive
										B7533_uncultured candidate division SPAM bacterium	A93_Methanosarcina	0.6857	0.005	AB	positive
										B315_uncultured	A93_Methanosarcina	-0.62	0.0099	AB	negative
										B663_Arenimonas	A93_Methanosarcina	0.7589	0.0235	AB	positive
										B1546_Geobacter	A93_Methanosarcina	0.8024	0.005	AB	positive
										B7940_Defluviicoccus	A93_Methanosarcina	0.6486	0.0137	AB	positive
										B5229_f_Burkholderiaceae	A93_Methanosarcina	0.7518	0.0334	AB	positive
										B1709_Ferruginibacter	A93_Methanosarcina	0.7136	0.005	AB	positive
										B1263_uncultured	A93_Methanosarcina	0.6189	0.0137	AB	positive
										B1780_Flavobacterium	A93_Methanosarcina	0.6893	0.005	AB	positive
										B287_uncultured planctomycete	A93_Methanosarcina	0.6141	0.005	AB	positive
										B1983_f_uncultured	A93_Methanosarcina	0.7092	0.0235	AB	positive
										B10163_Burkholderia-Caballeronia-Paraburkholderia	A93_Methanosarcina	0.6604	0.005	AB	positive
										B4776_Mucilaginibacter	A93_Methanosarcina	0.7009	0.005	AB	positive
										B6257_Nostoc PCC-7107	A93_Methanosarcina	0.6727	0.005	AB	positive
										B6258_Lysinibacillus	A93_Methanosarcina	0.7275	0.0235	AB	positive
										B3490_uncultured Desulfuromonadales bacterium	A93_Methanosarcina	0.6778	0.005	AB	positive
										B4296_Variovorax	A93_Methanosarcina	0.7404	0.0433	AB	positive
										B589_uncultured prokaryote	A93_Methanosarcina	0.6021	0.0388	AB	positive
										B1909_uncultured Chloroflexus sp.	A93_Methanosarcina	0.648	0.0137	AB	positive
										B887_uncultured	A93_Methanosarcina	0.6612	0.0235	AB	positive
										F741_Cladosporium	A93_Methanosarcina	0.6357	0.005	AF	positive
										F3858_unidentified	A93_Methanosarcina	0.6158	0.005	AF	positive
										F1033_Acremonium	A93_Methanosarcina	0.6277	0.0494	AF	positive
										F498_Fusarium	A93_Methanosarcina	0.6538	0.0137	AF	positive
										F44_Setophoma	A93_Methanosarcina	-0.6746	0.0396	AF	negative
										F1428_Penicillium	A93_Methanosarcina	0.6508	0.0137	AF	positive
										A115_Methanocella	B404_o_Subgroup 2	-0.838	0.0297	AB	negative
										A125_Methanosaeta	B404_o_Subgroup 2	-0.8079	0.0099	AB	negative
										A21_Methanosarcina	B5805_uncultured bacterium	0.6616	0.0098	AB	positive
										A144_Methanobacterium	B2123_Candidatus Udaeobacter	0.6752	0.0334	AB	positive
										A42_Methanosarcina	B2123_Candidatus Udaeobacter	0.7202	0.0137	AB	positive
										A61_Methanosaeta	B3725_Coxiella	0.6006	0.0137	AB	positive
										A19_Methanocella	F1278_o_NA	0.7428	0.0296	AF	positive
										A61_Methanosaeta	B8675_uncultured bacterium	0.6164	0.0235	AB	positive
										A115_Methanocella	B8400_Methylomicrobium	0.6708	0.005	AB	positive
										A125_Methanosaeta	B8400_Methylomicrobium	0.6398	0.005	AB	positive
										A10_Methanosaeta	B85_o_Subgroup 7	-0.6737	0.0297	AB	negative
										A144_Methanobacterium	B609_uncultured candidate division OS-K bacterium	0.7167	0.005	AB	positive
										A42_Methanosarcina	B609_uncultured candidate division OS-K bacterium	0.7069	0.0137	AB	positive
										A115_Methanocella	B2483_uncultured Acidobacteriales bacterium	0.633	0.0137	AB	positive
										A125_Methanosaeta	B2483_uncultured Acidobacteriales bacterium	0.6625	0.005	AB	positive
										A64_Methanobacterium	B1471_metagenome	0.6704	0.005	AB	positive
										A144_Methanobacterium	B2019_Novosphingobium	0.7197	0.005	AB	positive
										A42_Methanosarcina	B2019_Novosphingobium	0.7136	0.005	AB	positive
										A10_Methanosaeta	B100_Sphingomonas	-0.711	0.0297	AB	negative
										A64_Methanobacterium	B720_Sphingomonas	0.6884	0.0235	AB	positive
										A4_Methanosaeta	B794_f_Chitinophagaceae	-0.7379	0.0099	AB	negative
										A66_Methanosaeta	B908_f_Archangiaceae	0.7509	0.005	AB	positive
										A115_Methanocella	B540_Geobacter	0.737	0.0235	AB	positive
										A125_Methanosaeta	B540_Geobacter	0.6964	0.0235	AB	positive
										A21_Methanosarcina	B8305_OM27 clade	0.625	0.0197	AB	positive
										A64_Methanobacterium	B4112_Geobacter	0.6843	0.005	AB	positive
										A42_Methanosarcina	B6491_Gemmata	0.6017	0.005	AB	positive
										F1139_Pseudaleuria	A36_Methanosarcina	0.7028	0.0297	AF	positive
										B302_Phycicoccus	A36_Methanosarcina	-0.6829	0.0198	AB	negative
										B1680_Ferribacterium	A36_Methanosarcina	0.6295	0.0297	AB	positive
										B3271_o_NA	A36_Methanosarcina	0.6648	0.0198	AB	positive
										B638_alphaI cluster	A36_Methanosarcina	0.6444	0.0495	AB	positive
										A20_Rice Cluster I	A36_Methanosarcina	-0.6279	0.0396	A	negative
										B426_Kineosporia	A36_Methanosarcina	0.7015	0.0198	AB	positive
										A6_Candidatus Methanoperedens	A36_Methanosarcina	0.7715	0.0198	A	positive
										B384_UTBCD1	A36_Methanosarcina	0.6479	0.0297	AB	positive
										B8_Luteimonas	A36_Methanosarcina	-0.7562	0.0297	AB	negative
										B763_uncultured prokaryote	A36_Methanosarcina	-0.7145	0.0297	AB	negative
										A33_uncultured methanogenic archaeon	A36_Methanosarcina	0.7098	0.0198	A	positive
										B1118_Herminiimonas	A36_Methanosarcina	0.6332	0.0396	AB	positive
										B186_Cryobacterium	A36_Methanosarcina	-0.8066	0.0198	AB	negative
										B940_Hymenobacter	A36_Methanosarcina	0.779	0.0099	AB	positive
										F38_Phaeosphaeria	A36_Methanosarcina	0.6063	0.0495	AF	positive
										F76_f_Hyaloscyphaceae	A36_Methanosarcina	0.6729	0.0297	AF	positive
										F59_Venturia	A36_Methanosarcina	0.6019	0.0396	AF	positive
										F491_Sampaiozyma	A36_Methanosarcina	0.6057	0.0495	AF	positive
										A4_Methanosaeta	A21_Methanosarcina	-0.6466	0.0396	A	negative
										F212_Penicillium	A21_Methanosarcina	-0.6706	0.0495	AF	negative
										F128_o_NA	A21_Methanosarcina	-0.6156	0.0495	AF	negative
										B904_uncultured	A21_Methanosarcina	-0.7249	0.0198	AB	negative
										B1099_JGI 0001001-H03	A21_Methanosarcina	0.7663	0.0098	AB	positive
										B453_uncultured bacterium	A21_Methanosarcina	-0.7252	0.0297	AB	negative
										A14_Candidatus Nitrosotalea	A21_Methanosarcina	-0.6368	0.0396	A	negative
										B108_uncultured prokaryote	A21_Methanosarcina	0.8161	0.0395	AB	positive
										B29_Defluviicoccus	A21_Methanosarcina	0.6627	0.0099	AB	positive
										B40_f_Nocardioidaceae	A21_Methanosarcina	0.8555	0.0098	AB	positive
										B4575_uncultured	A21_Methanosarcina	0.6426	0.0098	AB	positive
										B4152_uncultured bacterium	A21_Methanosarcina	0.6228	0.0098	AB	positive
										B373_Arenimonas	A21_Methanosarcina	0.7041	0.0198	AB	positive
										B212_f_SC-I-84	A21_Methanosarcina	-0.6593	0.0198	AB	negative
										B324_f_SC-I-84	A21_Methanosarcina	0.6223	0.0396	AB	positive
										B6070_f_Microscillaceae	A21_Methanosarcina	0.7379	0.0098	AB	positive
										B580_Aetherobacter	A21_Methanosarcina	0.6795	0.0198	AB	positive
										B2112_uncultured	A21_Methanosarcina	0.6599	0.0099	AB	positive
										B90_uncultured	A21_Methanosarcina	-0.6617	0.0198	AB	negative
										F264_Papiliotrema	A21_Methanosarcina	-0.8811	0.0099	AF	negative
										F147_Papiliotrema	A21_Methanosarcina	0.6062	0.0396	AF	positive
										F277_o_Sordariales	A21_Methanosarcina	0.6403	0.0198	AF	positive
										F171_Thanatephorus	A21_Methanosarcina	-0.6353	0.0495	AF	negative
										F280_Cyphellophora	A21_Methanosarcina	0.6508	0.0198	AF	positive
										F14_Pyrenochaetopsis	A21_Methanosarcina	0.6049	0.0297	AF	positive
										A11_unidentified archaeon	A66_Methanosaeta	0.8354	0.0235	A	positive
										B1530_f_AKYH767	A66_Methanosaeta	0.6364	0.005	AB	positive
										B1773_uncultured	A66_Methanosaeta	0.6979	0.005	AB	positive
										B6064_uncultured bacterium	A66_Methanosaeta	0.6386	0.0334	AB	positive
										F1217_o_NA	A66_Methanosaeta	0.6489	0.0235	AF	positive
										F1913_o_NA	A66_Methanosaeta	0.6183	0.005	AF	positive
										B1022_Novosphingobium	A66_Methanosaeta	0.668	0.0137	AB	positive
										B453_uncultured bacterium	A66_Methanosaeta	-0.8619	0.0198	AB	negative
										B4063_Bryobacter	A66_Methanosaeta	0.6688	0.0235	AB	positive
										B879_metagenome	A66_Methanosaeta	0.7557	0.005	AB	positive
										B6277_metagenome	A66_Methanosaeta	0.6184	0.0137	AB	positive
										B8352_uncultured microorganism	A66_Methanosaeta	0.6452	0.0235	AB	positive
										B811_Phaeodactylibacter	A66_Methanosaeta	0.6997	0.0137	AB	positive
										B345_Haliangium	A66_Methanosaeta	0.7324	0.0137	AB	positive
										B686_Ferritrophicum	A66_Methanosaeta	0.6451	0.0235	AB	positive
										B2719_Rhodopila	A66_Methanosaeta	0.6604	0.005	AB	positive
										B66_uncultured	A66_Methanosaeta	0.6579	0.0137	AB	positive
										B2239_o_OPB41	A66_Methanosaeta	0.6255	0.0235	AB	positive
										B1483_MND1	A66_Methanosaeta	0.6982	0.005	AB	positive
										B4349_f_Burkholderiaceae	A66_Methanosaeta	0.7336	0.0334	AB	positive
										B133_uncultured Chloroflexi bacterium	A66_Methanosaeta	0.7883	0.005	AB	positive
										B138_f_Xanthobacteraceae	A66_Methanosaeta	0.7755	0.005	AB	positive
										B7855_uncultured candidate division SPAM bacterium	A66_Methanosaeta	0.6286	0.0137	AB	positive
										B212_f_SC-I-84	A66_Methanosaeta	-0.8798	0.0198	AB	negative
										B4018_o_OPB56	A66_Methanosaeta	0.6685	0.0334	AB	positive
										B1261_uncultured Bradyrhizobiaceae bacterium	A66_Methanosaeta	0.6161	0.005	AB	positive
										B1002_Nitrospira	A66_Methanosaeta	0.6623	0.0137	AB	positive
										B2279_hydrothermal vent metagenome	A66_Methanosaeta	0.6975	0.0137	AB	positive
										B772_Clostridium sensu stricto 1	A66_Methanosaeta	0.7304	0.005	AB	positive
										A485_uncultured archaeon	A66_Methanosaeta	0.7058	0.005	A	positive
										B1559_uncultured Syntrophobacteraceae bacterium	A66_Methanosaeta	0.6787	0.0235	AB	positive
										B467_f_uncultured	A66_Methanosaeta	0.609	0.0334	AB	positive
										B549_uncultured soil bacterium	A66_Methanosaeta	0.6467	0.0433	AB	positive
										B4680_metagenome	A66_Methanosaeta	0.699	0.0137	AB	positive
										B3273_Solirubrobacter	A66_Methanosaeta	0.6528	0.005	AB	positive
										B361_f_SC-I-84	A66_Methanosaeta	0.6834	0.0235	AB	positive
										B1721_uncultured prokaryote	A66_Methanosaeta	0.7177	0.0137	AB	positive
										B343_uncultured	A66_Methanosaeta	0.6742	0.0235	AB	positive
										B595_uncultured bacterium 5G12	A66_Methanosaeta	0.7053	0.0235	AB	positive
										B1816_Bryobacter	A66_Methanosaeta	0.7057	0.0137	AB	positive
										B2_uncultured prokaryote	A66_Methanosaeta	-0.6743	0.0198	AB	negative
										B6669_uncultured	A66_Methanosaeta	0.6912	0.005	AB	positive
										B7322_Nostoc PCC-7107	A66_Methanosaeta	0.6516	0.0334	AB	positive
										B90_uncultured	A66_Methanosaeta	-0.8884	0.0396	AB	negative
										F314_Curvularia	A66_Methanosaeta	0.6062	0.005	AF	positive
										F264_Papiliotrema	A66_Methanosaeta	-0.6096	0.0495	AF	negative
										F147_Papiliotrema	A66_Methanosaeta	0.6751	0.0495	AF	positive
										F141_Fusarium	A66_Methanosaeta	0.7357	0.0137	AF	positive
										F109_Myrmecridium	A66_Methanosaeta	0.6126	0.0289	AF	positive
										F1096_Aspergillus	A66_Methanosaeta	0.6604	0.005	AF	positive
										A249_uncultured euryarchaeote	A66_Methanosaeta	0.7446	0.0235	A	positive
										B2193_uncultured Polyangiaceae bacterium	A115_Methanocella	0.6946	0.005	AB	positive
										B3540_uncultured Bacteroidetes bacterium	A115_Methanocella	0.6097	0.0235	AB	positive
										B5025_uncultured prokaryote	A115_Methanocella	0.6713	0.0137	AB	positive
										B2466_uncultured prokaryote	A115_Methanocella	0.6705	0.0137	AB	positive
										B196_uncultured	A115_Methanocella	0.6277	0.0137	AB	positive
										B4770_f_Pedosphaeraceae	A115_Methanocella	0.7481	0.005	AB	positive
										B8158_uncultured Caldilineaceae bacterium	A115_Methanocella	0.6488	0.0235	AB	positive
										B3378_Gallionella	A115_Methanocella	0.6997	0.0137	AB	positive
										B828_uncultured	A115_Methanocella	0.6872	0.0137	AB	positive
										B619_o_NA	A115_Methanocella	0.7131	0.0137	AB	positive
										B6522_f_uncultured	A115_Methanocella	0.7028	0.005	AB	positive
										B1505_uncultured	A115_Methanocella	0.656	0.0137	AB	positive
										B9176_f_Micromonosporaceae	A115_Methanocella	0.655	0.005	AB	positive
										B264_Thiobacillus	A115_Methanocella	0.7224	0.0235	AB	positive
										B6019_metagenome	A115_Methanocella	0.6176	0.0137	AB	positive
										B1549_o_Myxococcales	A115_Methanocella	0.7318	0.0137	AB	positive
										B995_Ferruginibacter	A115_Methanocella	0.7362	0.005	AB	positive
										B2839_Gaiella	A115_Methanocella	0.6742	0.005	AB	positive
										B570_uncultured Conexibacter sp.	A115_Methanocella	0.6447	0.0137	AB	positive
										B4333_o_Betaproteobacteriales	A115_Methanocella	0.6017	0.0137	AB	positive
										B6045_o_NA	A115_Methanocella	0.7375	0.0235	AB	positive
										B57_Conexibacter	A115_Methanocella	0.7126	0.0137	AB	positive
										B1189_uncultured Acidobacteriaceae bacterium	A115_Methanocella	0.7162	0.0137	AB	positive
										B510_Candidatus Solibacter	A115_Methanocella	0.7716	0.005	AB	positive
										B490_f_Acidobacteriaceae (Subgroup 1)	A115_Methanocella	0.615	0.005	AB	positive
										B1260_Ellin6067	A115_Methanocella	0.7186	0.005	AB	positive
										B1051_uncultured	A115_Methanocella	0.6094	0.0235	AB	positive
										B6068_uncultured	A115_Methanocella	0.729	0.0137	AB	positive
										B2912_uncultured	A115_Methanocella	0.6025	0.005	AB	positive
										B813_metagenome	A115_Methanocella	0.6755	0.005	AB	positive
										B8311_uncultured	A115_Methanocella	0.6705	0.0137	AB	positive
										B3855_o_NA	A115_Methanocella	0.6324	0.0334	AB	positive
										B325_Phenylobacterium	A115_Methanocella	0.6995	0.005	AB	positive
										B2702_Subgroup 10	A115_Methanocella	0.6741	0.005	AB	positive
										B8992_Candidatus Nostocoida	A115_Methanocella	0.6052	0.0137	AB	positive
										B291_uncultured	A115_Methanocella	0.6555	0.005	AB	positive
										B3151_f_Rhodocyclaceae	A115_Methanocella	0.7751	0.0137	AB	positive
										B4141_uncultured Geoalkalibacter sp.	A115_Methanocella	0.6302	0.005	AB	positive
										B623_uncultured Prosthecobacter sp.	A115_Methanocella	0.7158	0.005	AB	positive
										B8477_Bryobacter	A115_Methanocella	0.6193	0.005	AB	positive
										B538_Nocardioides	A115_Methanocella	0.6931	0.0235	AB	positive
										B1602_Pseudomonas	A115_Methanocella	0.7559	0.005	AB	positive
										A39_Candidatus Nitrocosmicus	A115_Methanocella	0.8085	0.0235	A	positive
										B8648_o_Rokubacteriales	A115_Methanocella	0.6561	0.005	AB	positive
										B1733_Haliangium	A115_Methanocella	0.7467	0.005	AB	positive
										B726_uncultured soil bacterium	A115_Methanocella	0.6387	0.005	AB	positive
										B2054_Devosia	A115_Methanocella	0.637	0.0235	AB	positive
										A125_Methanosaeta	A115_Methanocella	0.758	0.0235	A	positive
										B9063_Geobacter	A115_Methanocella	0.7112	0.005	AB	positive
										B7630_Streptomyces	A115_Methanocella	0.6665	0.005	AB	positive
										B250_o_NA	A115_Methanocella	-0.8707	0.0099	AB	negative
										B3905_Mesorhizobium	A115_Methanocella	0.6915	0.005	AB	positive
										B1165_o_RBG-13-54-9	A115_Methanocella	0.6208	0.0235	AB	positive
										B1410_MND1	A115_Methanocella	0.7338	0.005	AB	positive
										F1039_Paraphaeosphaeria	A115_Methanocella	0.7095	0.005	AF	positive
										F1087_Curvularia	A115_Methanocella	0.6121	0.0137	AF	positive
										F111_Pseudeurotium	A115_Methanocella	-0.6801	0.0198	AF	negative
										F381_Fusarium	A115_Methanocella	0.6162	0.019	AF	positive
										B781_o_Acidobacteriales	A144_Methanobacterium	0.723	0.005	AB	positive
										B1_uncultured prokaryote	A144_Methanobacterium	0.6511	0.0198	AB	positive
										B605_o_NA	A144_Methanobacterium	0.7261	0.005	AB	positive
										B436_f_Lentimicrobiaceae	A144_Methanobacterium	0.6151	0.0334	AB	positive
										A15_unidentified archaeon	A144_Methanobacterium	0.6165	0.0487	A	positive
										F913_o_NA	A144_Methanobacterium	0.6009	0.005	AF	positive
										F781_unidentified	A144_Methanobacterium	0.703	0.0235	AF	positive
										B2802_uncultured	A144_Methanobacterium	0.7002	0.0137	AB	positive
										B7191_Haliangium	A144_Methanobacterium	0.6128	0.0137	AB	positive
										B6363_Chthoniobacter	A144_Methanobacterium	0.6128	0.005	AB	positive
										B1920_uncultured soil bacterium	A144_Methanobacterium	0.6519	0.0334	AB	positive
										B167_o_NA	A144_Methanobacterium	0.7192	0.005	AB	positive
										B836_Sh765B-TzT-35	A144_Methanobacterium	0.6604	0.0137	AB	positive
										B247_Arenimonas	A144_Methanobacterium	-0.6228	0.0495	AB	negative
										B70_Geobacter	A144_Methanobacterium	0.7272	0.0137	AB	positive
										B5932_f_Ruminococcaceae	A144_Methanobacterium	0.7004	0.0137	AB	positive
										B823_o_OPB41	A144_Methanobacterium	0.693	0.0137	AB	positive
										B482_Subgroup 10	A144_Methanobacterium	0.6837	0.0433	AB	positive
										B1618_Candidatus Solibacter	A144_Methanobacterium	0.6983	0.0137	AB	positive
										B7315_Gemmatimonas	A144_Methanobacterium	0.6655	0.0137	AB	positive
										B12574_uncultured	A144_Methanobacterium	0.6325	0.0334	AB	positive
										B2864_f_67-14	A144_Methanobacterium	0.6212	0.0388	AB	positive
										B1606_Methylomonas	A144_Methanobacterium	0.6567	0.0235	AB	positive
										B110_Ellin6067	A144_Methanobacterium	0.7273	0.0235	AB	positive
										B1191_Terrimonas	A144_Methanobacterium	0.6377	0.0235	AB	positive
										B1518_ADurb.Bin063-1	A144_Methanobacterium	0.7117	0.0137	AB	positive
										B6868_f_Pedosphaeraceae	A144_Methanobacterium	0.698	0.0137	AB	positive
										B374_uncultured proteobacterium	A144_Methanobacterium	0.7077	0.0235	AB	positive
										A42_Methanosarcina	A144_Methanobacterium	0.7731	0.005	A	positive
										B217_uncultured	A144_Methanobacterium	0.7447	0.005	AB	positive
										B1609_Geobacter	A144_Methanobacterium	0.6767	0.005	AB	positive
										B2546_Desulfosporosinus	A144_Methanobacterium	0.6123	0.0334	AB	positive
										B9060_Bacillus	A144_Methanobacterium	0.6708	0.0137	AB	positive
										B699_AKIW659	A144_Methanobacterium	0.7073	0.0235	AB	positive
										B10667_o_NA	A144_Methanobacterium	0.6358	0.005	AB	positive
										B4603_Tolypothrix PCC-7601	A144_Methanobacterium	0.6565	0.0137	AB	positive
										B8482_uncultured	A144_Methanobacterium	0.62	0.0235	AB	positive
										B256_Mesorhizobium	A144_Methanobacterium	0.6114	0.0099	AB	positive
										B5448_f_Burkholderiaceae	A144_Methanobacterium	0.6953	0.005	AB	positive
										B4670_OLB12	A144_Methanobacterium	0.6835	0.005	AB	positive
										B1484_o_Sva0485	A144_Methanobacterium	0.7138	0.005	AB	positive
										B427_uncultured Spirochaetales bacterium	A144_Methanobacterium	0.6753	0.0137	AB	positive
										B1292_Sphingomonas	A144_Methanobacterium	0.6176	0.0334	AB	positive
										B546_Clostridium sensu stricto 1	A144_Methanobacterium	0.7102	0.0137	AB	positive
										F130_Peziza	A144_Methanobacterium	0.6058	0.0198	AF	positive
										B355_uncultured	A8_Methanobacterium	0.6836	0.0396	AB	positive
										B534_uncultured bacterium	A8_Methanobacterium	-0.6927	0.0099	AB	negative
										A18_o_NA	A8_Methanobacterium	-0.6266	0.0198	A	negative
										B247_Arenimonas	A8_Methanobacterium	0.9702	0.0099	AB	positive
										A61_Methanosaeta	A8_Methanobacterium	-0.6545	0.0396	A	negative
										B2864_f_67-14	A8_Methanobacterium	-0.7736	0.0198	AB	negative
										B4588_f_67-14	A8_Methanobacterium	-0.8036	0.0099	AB	negative
										B756_f_A21b	A8_Methanobacterium	-0.7872	0.0099	AB	negative
										A42_Methanosarcina	A8_Methanobacterium	-0.6222	0.0495	A	negative
										B957_Polaromonas	A8_Methanobacterium	-0.8533	0.0198	AB	negative
										F851_Penicillium	A8_Methanobacterium	-0.7556	0.0099	AF	negative
										F133_Phaeosphaeria	A8_Methanobacterium	-0.7069	0.0297	AF	negative
										F294_Pyricularia	A8_Methanobacterium	-0.8644	0.0099	AF	negative
										F29_Tetracladium	A8_Methanobacterium	0.6874	0.0099	AF	positive
										F440_Bullera	A8_Methanobacterium	-0.7537	0.0099	AF	negative
										F231_Tetracladium	A8_Methanobacterium	0.7656	0.0198	AF	positive
										F347_Filobasidium	A8_Methanobacterium	-0.7506	0.0198	AF	negative
										A125_Methanosaeta	B2193_uncultured Polyangiaceae bacterium	0.7145	0.005	AB	positive
										A42_Methanosarcina	B781_o_Acidobacteriales	0.7176	0.0137	AB	positive
										A61_Methanosaeta	B1270_Arenimonas	0.7362	0.0334	AB	positive
										A42_Methanosarcina	B11430_Dehalobacter	0.6198	0.0235	AB	positive
										A44_Methanosaeta	B214_Sulfurifustis	-0.6415	0.0495	AB	negative
										A42_Methanosarcina	B3215_uncultured	0.6169	0.005	AB	positive
										A61_Methanosaeta	B914_uncultured Syntrophaceae bacterium	0.7313	0.005	AB	positive
										A4_Methanosaeta	B606_unidentified	0.6207	0.0396	AB	positive
										A42_Methanosarcina	B1_uncultured prokaryote	0.7279	0.0099	AB	positive
										A10_Methanosaeta	B521_Arenimonas	0.6025	0.0495	AB	positive
										A42_Methanosarcina	B605_o_NA	0.776	0.005	AB	positive
										B527_uncultured prokaryote	A4_Methanosaeta	0.667	0.0297	AB	positive
										F970_o_NA	A4_Methanosaeta	-0.6744	0.0198	AF	negative
										B226_metagenome	A4_Methanosaeta	-0.7135	0.0297	AB	negative
										A14_Candidatus Nitrosotalea	A4_Methanosaeta	0.7994	0.0099	A	positive
										B491_Sideroxydans	A4_Methanosaeta	-0.6258	0.0198	AB	negative
										B108_uncultured prokaryote	A4_Methanosaeta	-0.6057	0.0396	AB	negative
										B1686_uncultured	A4_Methanosaeta	-0.6216	0.0495	AB	negative
										B1683_uncultured	A4_Methanosaeta	0.6908	0.0396	AB	positive
										B40_f_Nocardioidaceae	A4_Methanosaeta	-0.6387	0.0198	AB	negative
										B141_f_uncultured	A4_Methanosaeta	0.6657	0.0396	AB	positive
										B1431_uncultured Planctomyces sp.	A4_Methanosaeta	-0.6007	0.0396	AB	negative
										B211_f_SC-I-84	A4_Methanosaeta	0.7058	0.0297	AB	positive
										B746_Candidatus Udaeobacter	A4_Methanosaeta	-0.73	0.0198	AB	negative
										B324_f_SC-I-84	A4_Methanosaeta	-0.7482	0.0099	AB	negative
										B203_uncultured Sorangiineae bacterium	A4_Methanosaeta	-0.6829	0.0495	AB	negative
										A7_f_uncultured	A4_Methanosaeta	0.665	0.0495	A	positive
										B561_Jatrophihabitans	A4_Methanosaeta	-0.6375	0.0495	AB	negative
										B115_f_Micrococcaceae	A4_Methanosaeta	0.6287	0.0297	AB	positive
										B3_uncultured prokaryote	A4_Methanosaeta	0.7211	0.0297	AB	positive
										B4817_uncultured	A4_Methanosaeta	-0.6221	0.0297	AB	negative
										F30_f_Didymellaceae	A4_Methanosaeta	0.7339	0.0297	AF	positive
										F245_Plectosphaerella	A4_Methanosaeta	0.6812	0.0297	AF	positive
										F190_Schizothecium	A4_Methanosaeta	0.7236	0.0396	AF	positive
										F280_Cyphellophora	A4_Methanosaeta	-0.7627	0.0198	AF	negative
										F374_Fusarium	A4_Methanosaeta	0.6151	0.0297	AF	positive
										B1067_uncultured	A19_Methanocella	0.7877	0.0197	AB	positive
										F1597_o_NA	A19_Methanocella	0.7097	0.0098	AF	positive
										F970_o_NA	A19_Methanocella	-0.6182	0.0099	AF	negative
										B5748_Chryseolinea	A19_Methanocella	0.7004	0.0197	AB	positive
										B900_uncultured soil bacterium	A19_Methanocella	0.754	0.0197	AB	positive
										B3002_Z114MB74	A19_Methanocella	0.6004	0.0099	AB	positive
										B290_f_SC-I-84	A19_Methanocella	0.6112	0.0396	AB	positive
										B2503_f_Ruminococcaceae	A19_Methanocella	0.6068	0.0396	AB	positive
										B845_Terrimonas	A19_Methanocella	0.6322	0.0297	AB	positive
										B919_uncultured bacterium	A19_Methanocella	0.7002	0.0098	AB	positive
										B385_uncultured	A19_Methanocella	0.6093	0.0198	AB	positive
										B254_Sh765B-TzT-35	A19_Methanocella	0.7592	0.0098	AB	positive
										F624_Vishniacozyma	A19_Methanocella	0.7458	0.0197	AF	positive
										F740_unidentified	A19_Methanocella	0.7257	0.0098	AF	positive
										F813_Paranamyces	A19_Methanocella	0.662	0.0198	AF	positive
										A10_Methanosaeta	B527_uncultured prokaryote	-0.6822	0.0495	AB	negative
										A125_Methanosaeta	B3540_uncultured Bacteroidetes bacterium	0.6142	0.0137	AB	positive
										A42_Methanosarcina	B436_f_Lentimicrobiaceae	0.6807	0.0235	AB	positive
										A125_Methanosaeta	B5025_uncultured prokaryote	0.6332	0.0137	AB	positive
										A42_Methanosarcina	A15_unidentified archaeon	0.6456	0.019	A	positive
										A44_Methanosaeta	B5047_Lysinibacillus	0.6107	0.0487	AB	positive
										A61_Methanosaeta	B7107_OLB12	0.7133	0.005	AB	positive
										A10_Methanosaeta	B3040_uncultured soil bacterium	0.7704	0.0197	AB	positive
										A44_Methanosaeta	A302_Candidatus Nitrocosmicus	0.6187	0.019	A	positive
										A125_Methanosaeta	B2466_uncultured prokaryote	0.6425	0.0334	AB	positive
										A61_Methanosaeta	B895_Methylotenera	0.6176	0.0235	AB	positive
										A61_Methanosaeta	A499_o_NA	0.6679	0.0388	A	positive
										A64_Methanobacterium	A535_o_NA	0.6779	0.0137	A	positive
										A64_Methanobacterium	B3997_uncultured Conexibacteraceae bacterium	0.6042	0.0334	AB	positive
										A61_Methanosaeta	F4285_unidentified	0.6564	0.0137	AF	positive
										A42_Methanosarcina	F781_unidentified	0.7748	0.0137	AF	positive
										A61_Methanosaeta	F88_unidentified	-0.8995	0.0198	AF	negative
										A10_Methanosaeta	B5682_f_Sandaracinaceae	0.6603	0.0395	AB	positive
										A125_Methanosaeta	F5480_unidentified	0.6166	0.005	AF	positive
										A64_Methanobacterium	B13597_uncultured	0.6175	0.005	AB	positive
										A61_Methanosaeta	A412_uncultured archaeon	0.7464	0.0137	A	positive
										A44_Methanosaeta	F128_o_NA	-0.6353	0.0495	AF	negative
										A10_Methanosaeta	F128_o_NA	0.6084	0.0495	AF	positive
										A61_Methanosaeta	B8102_f_Nostocaceae	0.6059	0.0235	AB	positive
										A125_Methanosaeta	B4770_f_Pedosphaeraceae	0.6875	0.005	AB	positive
										A125_Methanosaeta	F2192_unidentified	0.6068	0.0137	AF	positive
										A10_Methanosaeta	F2780_unidentified	0.6867	0.0099	AF	positive
										A125_Methanosaeta	B8158_uncultured Caldilineaceae bacterium	0.6127	0.0137	AB	positive
										A44_Methanosaeta	F578_o_NA	0.6252	0.0091	AF	positive
										A61_Methanosaeta	A546_uncultured euryarchaeote	0.791	0.0235	A	positive
										A125_Methanosaeta	B3378_Gallionella	0.6753	0.0137	AB	positive
										A64_Methanobacterium	A373_o_Marine Group II	0.6792	0.005	A	positive
										A42_Methanosarcina	B3060_o_NA	0.6191	0.0487	AB	positive
										A125_Methanosaeta	B828_uncultured	0.6573	0.0235	AB	positive
										A125_Methanosaeta	B619_o_NA	0.7122	0.005	AB	positive
										A44_Methanosaeta	B1055_Acidothermus	0.7912	0.0098	AB	positive
										A61_Methanosaeta	B34_f_Xanthobacteraceae	0.7512	0.0235	AB	positive
										A125_Methanosaeta	B6522_f_uncultured	0.6923	0.0334	AB	positive
										A42_Methanosarcina	B1834_uncultured	0.6328	0.0334	AB	positive
										A44_Methanosaeta	B226_metagenome	0.6011	0.0297	AB	positive
										A61_Methanosaeta	B286_uncultured	0.603	0.0235	AB	positive
										A42_Methanosarcina	B2802_uncultured	0.7348	0.0137	AB	positive
										A64_Methanobacterium	B1290_wastewater metagenome	0.6891	0.0235	AB	positive
										A61_Methanosaeta	B3030_Fluviicola	0.6265	0.005	AB	positive
										A125_Methanosaeta	B1505_uncultured	0.6368	0.005	AB	positive
										A125_Methanosaeta	B9176_f_Micromonosporaceae	0.6389	0.0137	AB	positive
										A125_Methanosaeta	B264_Thiobacillus	0.7294	0.0433	AB	positive
										A44_Methanosaeta	B505_f_Micromonosporaceae	0.6307	0.0297	AB	positive
										A64_Methanobacterium	B4485_uncultured	0.6325	0.0137	AB	positive
										A42_Methanosarcina	B5160_Pirellula	0.6183	0.0334	AB	positive
										A61_Methanosaeta	B3688_uncultured	0.744	0.0235	AB	positive
										B1286_Dokdonella	A44_Methanosaeta	0.6407	0.0198	AB	positive
										B464_uncultured	A44_Methanosaeta	0.6241	0.019	AB	positive
										B1337_f_SC-I-84	A44_Methanosaeta	0.8326	0.0098	AB	positive
										B17_uncultured Thermaerobacter sp.	A44_Methanosaeta	0.6293	0.0495	AB	positive
										B475_metagenome	A44_Methanosaeta	0.6706	0.0198	AB	positive
										B77_Candidatus Nitrotoga	A44_Methanosaeta	0.8698	0.0098	AB	positive
										B2022_Massilia	A44_Methanosaeta	0.6092	0.0388	AB	positive
										F305_unidentified	A44_Methanosaeta	-0.7315	0.0396	AF	negative
										F14_Pyrenochaetopsis	A44_Methanosaeta	0.7011	0.0495	AF	positive
										A125_Methanosaeta	B12567_f_env.OPS 17	0.617	0.005	AB	positive
										A42_Methanosarcina	B7191_Haliangium	0.6398	0.0235	AB	positive
										A64_Methanobacterium	B8353_f_67-14	0.6634	0.0137	AB	positive
										A64_Methanobacterium	B1345_Phenylobacterium	0.6339	0.0235	AB	positive
										A61_Methanosaeta	B786_o_CCD24	0.6608	0.0137	AB	positive
										A125_Methanosaeta	B1770_metagenome	0.6183	0.005	AB	positive
										A61_Methanosaeta	B8978_Nocardioides	0.6428	0.0137	AB	positive
										A61_Methanosaeta	B2980_uncultured	0.6351	0.0137	AB	positive
										A10_Methanosaeta	B1685_uncultured	0.6567	0.0198	AB	positive
										A10_Methanosaeta	B1663_f_Acetobacteraceae	0.6486	0.0197	AB	positive
										A125_Methanosaeta	B6019_metagenome	0.6478	0.0137	AB	positive
										A64_Methanobacterium	B6452_Lacunisphaera	0.6026	0.005	AB	positive
										A61_Methanosaeta	B4137_Dongia	0.6268	0.005	AB	positive
										A42_Methanosarcina	B6363_Chthoniobacter	0.6002	0.005	AB	positive
										A42_Methanosarcina	B1920_uncultured soil bacterium	0.7195	0.0137	AB	positive
										A125_Methanosaeta	B1549_o_Myxococcales	0.6384	0.0235	AB	positive
										A61_Methanosaeta	B155_Mycobacterium	0.6159	0.0091	AB	positive
										A125_Methanosaeta	B995_Ferruginibacter	0.6895	0.005	AB	positive
										A42_Methanosarcina	B167_o_NA	0.7768	0.005	AB	positive
										A61_Methanosaeta	B2695_Sideroxydans	0.7453	0.005	AB	positive
										A64_Methanobacterium	B1746_Haliangium	0.7379	0.0235	AB	positive
										A10_Methanosaeta	B2444_uncultured	0.6474	0.0098	AB	positive
										A61_Methanosaeta	B950_f_Blastocatellaceae	0.7173	0.0137	AB	positive
										A125_Methanosaeta	B2839_Gaiella	0.6514	0.005	AB	positive
										A64_Methanobacterium	B2051_f_Acetobacteraceae	0.648	0.0235	AB	positive
										A64_Methanobacterium	B1340_uncultured bacterium	0.6127	0.005	AB	positive
										A64_Methanobacterium	B959_Jatrophihabitans	0.6259	0.0235	AB	positive
										A64_Methanobacterium	B8202_Hyphomicrobium	0.669	0.0137	AB	positive
										A61_Methanosaeta	B902_Aquisphaera	0.6763	0.0137	AB	positive
										B171_Candidatus Koribacter	A64_Methanobacterium	0.6102	0.0388	AB	positive
										B6473_Solirubrobacter	A64_Methanobacterium	0.6747	0.005	AB	positive
										B399_Conexibacter	A64_Methanobacterium	0.694	0.005	AB	positive
										B2714_o_SBR1031	A64_Methanobacterium	0.7004	0.005	AB	positive
										B814_Flavisolibacter	A64_Methanobacterium	0.6365	0.0235	AB	positive
										B2376_uncultured soil bacterium	A64_Methanobacterium	0.6298	0.0137	AB	positive
										B476_Arenimonas	A64_Methanobacterium	0.7037	0.0137	AB	positive
										B135_Nakamurella	A64_Methanobacterium	0.7074	0.0334	AB	positive
										B596_Massilia	A64_Methanobacterium	0.7763	0.0137	AB	positive
										B6282_Hymenobacter	A64_Methanobacterium	0.6177	0.0137	AB	positive
										B301_uncultured candidate division SPAM bacterium	A64_Methanobacterium	0.6579	0.005	AB	positive
										A211_Candidatus Methanoperedens	A64_Methanobacterium	0.8031	0.0334	A	positive
										B3132_Haliangium	A64_Methanobacterium	0.6302	0.0137	AB	positive
										B4869_Clostridium sensu stricto 10	A64_Methanobacterium	0.6213	0.0235	AB	positive
										A73_uncultured	A64_Methanobacterium	0.6726	0.0235	A	positive
										B19_uncultured soil bacterium	A64_Methanobacterium	-0.8408	0.0495	AB	negative
										B7396_Noviherbaspirillum	A64_Methanobacterium	0.6728	0.0433	AB	positive
										B10079_uncultured Lutispora sp.	A64_Methanobacterium	0.6254	0.0137	AB	positive
										B8470_Haliangium	A64_Methanobacterium	0.6356	0.005	AB	positive
										B1923_uncultured Anaerolineaceae bacterium	A64_Methanobacterium	0.6411	0.0137	AB	positive
										B3085_o_NA	A64_Methanobacterium	0.6725	0.0137	AB	positive
										B5384_f_Micromonosporaceae	A64_Methanobacterium	0.6801	0.0137	AB	positive
										B451_f_uncultured	A64_Methanobacterium	0.6775	0.005	AB	positive
										B1503_uncultured proteobacterium	A64_Methanobacterium	0.6879	0.0235	AB	positive
										B1147_f_Pedosphaeraceae	A64_Methanobacterium	0.6846	0.005	AB	positive
										A3_o_NA	A64_Methanobacterium	0.8012	0.0137	A	positive
										B2280_uncultured prokaryote	A64_Methanobacterium	0.6738	0.0235	AB	positive
										B2181_Ellin6067	A64_Methanobacterium	0.6448	0.0334	AB	positive
										B5478_f_Pedosphaeraceae	A64_Methanobacterium	0.6491	0.0334	AB	positive
										B1291_o_S085	A64_Methanobacterium	0.6311	0.0235	AB	positive
										B734_ADurb.Bin063-1	A64_Methanobacterium	0.7146	0.005	AB	positive
										F92_Paraphaeosphaeria	A64_Methanobacterium	-0.6706	0.0099	AF	negative
										F31_Alternaria	A64_Methanobacterium	-0.6291	0.0297	AF	negative
										F2_Mortierella	A64_Methanobacterium	-0.6365	0.0396	AF	negative
										F53_Schizothecium	A64_Methanobacterium	0.7117	0.0334	AF	positive
										F32_Dimorphospora	A64_Methanobacterium	-0.8328	0.0198	AF	negative
										A61_Methanosaeta	A18_o_NA	0.8642	0.0137	A	positive
										A10_Methanosaeta	B152_uncultured prokaryote	0.7003	0.0297	AB	positive
										A42_Methanosarcina	B836_Sh765B-TzT-35	0.7011	0.0137	AB	positive
										A10_Methanosaeta	B433_Syntrophobacter	0.6434	0.0396	AB	positive
										A42_Methanosarcina	B247_Arenimonas	-0.6226	0.0495	AB	negative
										A61_Methanosaeta	B1925_uncultured prokaryote	0.7	0.0137	AB	positive
										A125_Methanosaeta	B570_uncultured Conexibacter sp.	0.6267	0.005	AB	positive
										A42_Methanosarcina	B70_Geobacter	0.7963	0.0137	AB	positive
										A125_Methanosaeta	B4333_o_Betaproteobacteriales	0.6377	0.005	AB	positive
										A125_Methanosaeta	B6045_o_NA	0.6721	0.0137	AB	positive
										B1801_uncultured Prosthecobacter sp.	A61_Methanosaeta	0.7629	0.0433	AB	positive
										B2545_uncultured bacterium	A61_Methanosaeta	0.7454	0.005	AB	positive
										B4179_uncultured bacterium	A61_Methanosaeta	0.6017	0.0137	AB	positive
										B4665_o_NA	A61_Methanosaeta	0.7457	0.005	AB	positive
										B515_o_Subgroup 7	A61_Methanosaeta	0.7205	0.005	AB	positive
										B1413_Subgroup 10	A61_Methanosaeta	0.6829	0.0137	AB	positive
										B1115_uncultured prokaryote	A61_Methanosaeta	0.6987	0.005	AB	positive
										B3981_f_Solibacteraceae (Subgroup 3)	A61_Methanosaeta	0.7733	0.0137	AB	positive
										B5791_o_NA	A61_Methanosaeta	0.7635	0.005	AB	positive
										B874_f_uncultured	A61_Methanosaeta	0.648	0.0197	AB	positive
										B492_Arenimonas	A61_Methanosaeta	0.6909	0.0334	AB	positive
										B480_Desulfobacca	A61_Methanosaeta	0.6885	0.0137	AB	positive
										B7531_uncultured prokaryote	A61_Methanosaeta	0.6811	0.0433	AB	positive
										B5032_f_Clostridiaceae 1	A61_Methanosaeta	0.6996	0.0137	AB	positive
										B7393_Plot4-2H12	A61_Methanosaeta	0.6858	0.005	AB	positive
										B336_o_NA	A61_Methanosaeta	0.7787	0.0137	AB	positive
										B768_uncultured proteobacterium	A61_Methanosaeta	0.6889	0.005	AB	positive
										B1229_uncultured bacterium	A61_Methanosaeta	0.6313	0.0388	AB	positive
										B6900_Allorhizobium-Neorhizobium-Pararhizobium-Rhizobium	A61_Methanosaeta	0.6851	0.0137	AB	positive
										B11023_f_uncultured	A61_Methanosaeta	0.6543	0.0235	AB	positive
										B233_Geobacter	A61_Methanosaeta	0.7577	0.005	AB	positive
										B356_f_P3OB-42	A61_Methanosaeta	0.7344	0.0137	AB	positive
										B568_o_Gaiellales	A61_Methanosaeta	0.753	0.0235	AB	positive
										B2118_f_Kineosporiaceae	A61_Methanosaeta	0.6742	0.019	AB	positive
										A90_uncultured archaeon VC2.1 Arc31	A61_Methanosaeta	0.7462	0.005	A	positive
										B2274_Candidatus Solibacter	A61_Methanosaeta	0.7665	0.005	AB	positive
										B4261_f_Ilumatobacteraceae	A61_Methanosaeta	0.6114	0.005	AB	positive
										B3444_f_Rhodocyclaceae	A61_Methanosaeta	0.7742	0.005	AB	positive
										A597_uncultured	A61_Methanosaeta	0.8061	0.0137	A	positive
										A50_Candidatus Methanoperedens	A61_Methanosaeta	0.8572	0.005	A	positive
										B1239_Syntrophus	A61_Methanosaeta	0.6969	0.0235	AB	positive
										B2668_Dokdonella	A61_Methanosaeta	0.7082	0.005	AB	positive
										A264_Candidatus Diapherotrites archaeon ADurb.Bin253	A61_Methanosaeta	0.7692	0.005	A	positive
										F70_Mortierella	A61_Methanosaeta	-0.8762	0.0198	AF	negative
										F709_Dioszegia	A61_Methanosaeta	0.62	0.0091	AF	positive
										F193_unidentified	A61_Methanosaeta	-0.8646	0.0297	AF	negative
										F147_Papiliotrema	A61_Methanosaeta	-0.6115	0.0495	AF	negative
										F219_unidentified	A61_Methanosaeta	0.7907	0.0137	AF	positive
										F6318_Neobulgaria	A61_Methanosaeta	0.6116	0.0235	AF	positive
										F347_Filobasidium	A61_Methanosaeta	0.7134	0.019	AF	positive
										A42_Methanosarcina	B5932_f_Ruminococcaceae	0.7487	0.005	AB	positive
										A42_Methanosarcina	B823_o_OPB41	0.7719	0.005	AB	positive
										A42_Methanosarcina	B482_Subgroup 10	0.7189	0.005	AB	positive
										A42_Methanosarcina	B1618_Candidatus Solibacter	0.7907	0.0137	AB	positive
										A42_Methanosarcina	B3853_Microcoleus PCC-7113	0.6197	0.0137	AB	positive
										A10_Methanosaeta	B9810_uncultured	0.6435	0.0098	AB	positive
										A125_Methanosaeta	B57_Conexibacter	0.6575	0.0235	AB	positive
										A125_Methanosaeta	B3402_Mucilaginibacter	0.6526	0.005	AB	positive
										A125_Methanosaeta	B1189_uncultured Acidobacteriaceae bacterium	0.6776	0.0137	AB	positive
										B631_f_uncultured	A10_Methanosaeta	0.6461	0.0297	AB	positive
										B899_Skermanella	A10_Methanosaeta	0.7279	0.0197	AB	positive
										B2875_o_uncultured	A10_Methanosaeta	0.6357	0.0098	AB	positive
										A43_uncultured euryarchaeote	A10_Methanosaeta	0.675	0.0099	A	positive
										B383_Massilia	A10_Methanosaeta	0.6539	0.0297	AB	positive
										B924_uncultured proteobacterium	A10_Methanosaeta	0.6412	0.0297	AB	positive
										B1392_o_uncultured	A10_Methanosaeta	0.8659	0.0098	AB	positive
										F151_o_Helotiales	A10_Methanosaeta	0.6214	0.0495	AF	positive
										F44_Setophoma	A10_Methanosaeta	-0.775	0.0198	AF	negative
										F23_f_Nectriaceae	A10_Methanosaeta	0.6569	0.0198	AF	positive
										F381_Fusarium	A10_Methanosaeta	0.8247	0.0197	AF	positive
										A125_Methanosaeta	B510_Candidatus Solibacter	0.6983	0.0334	AB	positive
										A125_Methanosaeta	B1260_Ellin6067	0.6943	0.005	AB	positive
										A125_Methanosaeta	B1051_uncultured	0.6406	0.005	AB	positive
										A42_Methanosarcina	B10751_uncultured bacterium SJA-121	0.6684	0.0137	AB	positive
										A125_Methanosaeta	B6068_uncultured	0.7021	0.005	AB	positive
										A42_Methanosarcina	B7315_Gemmatimonas	0.6829	0.0235	AB	positive
										A42_Methanosarcina	B12574_uncultured	0.6394	0.005	AB	positive
										A42_Methanosarcina	B1606_Methylomonas	0.7514	0.005	AB	positive
										A42_Methanosarcina	B110_Ellin6067	0.7798	0.005	AB	positive
										A42_Methanosarcina	B1191_Terrimonas	0.7171	0.0137	AB	positive
										A42_Methanosarcina	B1518_ADurb.Bin063-1	0.798	0.005	AB	positive
										A125_Methanosaeta	B8311_uncultured	0.6729	0.0137	AB	positive
										A42_Methanosarcina	B6868_f_Pedosphaeraceae	0.7173	0.0137	AB	positive
										A42_Methanosarcina	B374_uncultured proteobacterium	0.7384	0.0137	AB	positive
										A125_Methanosaeta	B325_Phenylobacterium	0.7119	0.005	AB	positive
										A125_Methanosaeta	B2702_Subgroup 10	0.6524	0.0137	AB	positive
										B217_uncultured	A42_Methanosarcina	0.786	0.0137	AB	positive
										B1609_Geobacter	A42_Methanosarcina	0.704	0.0334	AB	positive
										B2546_Desulfosporosinus	A42_Methanosarcina	0.625	0.0137	AB	positive
										B9060_Bacillus	A42_Methanosarcina	0.6916	0.0137	AB	positive
										B699_AKIW659	A42_Methanosarcina	0.7215	0.005	AB	positive
										B10667_o_NA	A42_Methanosarcina	0.6745	0.0137	AB	positive
										B4603_Tolypothrix PCC-7601	A42_Methanosarcina	0.705	0.005	AB	positive
										B8482_uncultured	A42_Methanosarcina	0.6876	0.0137	AB	positive
										B102_f_Micrococcaceae	A42_Methanosarcina	-0.6091	0.0396	AB	negative
										B256_Mesorhizobium	A42_Methanosarcina	0.6845	0.0198	AB	positive
										B5448_f_Burkholderiaceae	A42_Methanosarcina	0.7287	0.0235	AB	positive
										B4670_OLB12	A42_Methanosarcina	0.698	0.0235	AB	positive
										B1484_o_Sva0485	A42_Methanosarcina	0.7389	0.005	AB	positive
										B427_uncultured Spirochaetales bacterium	A42_Methanosarcina	0.7137	0.0235	AB	positive
										B546_Clostridium sensu stricto 1	A42_Methanosarcina	0.7318	0.0137	AB	positive
										F71_Spirosphaera	A42_Methanosarcina	0.626	0.0297	AF	positive
										F1499_Zymoseptoria	A42_Methanosarcina	0.6546	0.005	AF	positive
										F130_Peziza	A42_Methanosarcina	0.6334	0.0297	AF	positive
										A125_Methanosaeta	B291_uncultured	0.6696	0.0235	AB	positive
										A125_Methanosaeta	B3151_f_Rhodocyclaceae	0.7578	0.0137	AB	positive
										A125_Methanosaeta	B4141_uncultured Geoalkalibacter sp.	0.6304	0.005	AB	positive
										A125_Methanosaeta	B623_uncultured Prosthecobacter sp.	0.7227	0.005	AB	positive
										A125_Methanosaeta	B8477_Bryobacter	0.6094	0.0334	AB	positive
										A125_Methanosaeta	B538_Nocardioides	0.7415	0.005	AB	positive
										A125_Methanosaeta	B1602_Pseudomonas	0.7462	0.0334	AB	positive
										A125_Methanosaeta	A39_Candidatus Nitrocosmicus	0.7827	0.005	A	positive
										A125_Methanosaeta	B8648_o_Rokubacteriales	0.619	0.0137	AB	positive
										A125_Methanosaeta	B1733_Haliangium	0.7214	0.005	AB	positive
										A125_Methanosaeta	B726_uncultured soil bacterium	0.6308	0.0433	AB	positive
										A125_Methanosaeta	B2054_Devosia	0.6311	0.0137	AB	positive
										B7630_Streptomyces	A125_Methanosaeta	0.651	0.005	AB	positive
										B250_o_NA	A125_Methanosaeta	-0.8503	0.0099	AB	negative
										B3905_Mesorhizobium	A125_Methanosaeta	0.6148	0.0433	AB	positive
										B1410_MND1	A125_Methanosaeta	0.6674	0.0137	AB	positive
										F1039_Paraphaeosphaeria	A125_Methanosaeta	0.6534	0.005	AF	positive
										F111_Pseudeurotium	A125_Methanosaeta	-0.6451	0.0297	AF	negative

## Sheet: CJ2
Edge of methanogen and bacterial functional groups										Edge of methanogens
from	to	cor	p_value	Association	Category	Relationship				from	to	cor	p_value	Association	Category
A40_Methanosaeta	B5388_Methylosarcina	0.7117	0.0137	AB	positive	Methanogen-Methanotroph				A12_Methanobacterium	F301_o_NA	0.6899	0.0297	AF	positive
A265_Methanobacterium	B6569_Methylomonas	0.6699	0.0137	AB	positive	Methanogen-Methanotroph				A19_Methanocella	F301_o_NA	0.7201	0.0198	AF	positive
A12_Methanobacterium	B2937_Methylobacter	0.6495	0.0198	AB	positive	Methanogen-Methanotroph				A10_Methanosaeta	F301_o_NA	0.6623	0.0198	AF	positive
A58_Methanobacterium	B1357_Anaerolinea	0.6747	0.0099	AB	positive	Methanogen-Bacterial decomposer				A63_Methanosarcina	F301_o_NA	0.7503	0.0099	AF	positive
A40_Methanosaeta	B3167_Anaerolinea	0.6067	0.019	AB	positive	Methanogen-Bacterial decomposer				A36_Methanosarcina	F365_Murilentithecium	0.7143	0.0098	AF	positive
A144_Methanobacterium	B1152_Anaerolinea	0.7079	0.005	AB	positive	Methanogen-Bacterial decomposer				A66_Methanosaeta	F365_Murilentithecium	0.6084	0.0388	AF	positive
A66_Methanosaeta	B8214_Phenylobacterium	0.6446	0.0137	AB	positive	Methanogen-Bacterial decomposer				A4_Methanosaeta	F365_Murilentithecium	-0.6069	0.0297	AF	negative
A281_Methanocella	B1230_Phenylobacterium	0.6674	0.0235	AB	positive	Methanogen-Bacterial decomposer				A59_Methanocella	F1469_unidentified	-0.6071	0.0099	AF	negative
A144_Methanobacterium	B9199_Anaerolinea	0.6166	0.0334	AB	positive	Methanogen-Bacterial decomposer				A17_Methanobacterium	A576_uncultured euryarchaeote	0.6816	0.005	A	positive
B1980_Cellulomonas	A385_Methanobacterium	0.6845	0.0235	AB	positive	Methanogen-Bacterial decomposer				A66_Methanosaeta	F1323_o_Helotiales	0.7252	0.0137	AF	positive
B269_Anaerolinea	A17_Methanobacterium	0.6764	0.0137	AB	positive	Methanogen-Bacterial decomposer				A47_Methanobacterium	F1560_o_NA	0.7644	0.0098	AF	positive
B1111_Phenylobacterium	A17_Methanobacterium	0.7061	0.0334	AB	positive	Methanogen-Bacterial decomposer				A17_Methanobacterium	B1117_uncultured delta proteobacterium	0.6122	0.0137	AB	positive
B5140_Cellulomonas	A17_Methanobacterium	0.7055	0.005	AB	positive	Methanogen-Bacterial decomposer				A17_Methanobacterium	F3603_unidentified	0.6136	0.005	AF	positive
B7312_Dechloromonas	A17_Methanobacterium	0.6801	0.0137	AB	positive	Methanogen-Bacterial decomposer				A51_Methanosaeta	B2570_Desulfobacca	0.6636	0.005	AB	positive
A51_Methanosaeta	B3130_Anaerolinea	0.7382	0.005	AB	positive	Methanogen-Bacterial decomposer				A132_Methanosarcina	B6288_Haliangium	0.6529	0.0137	AB	positive
B415_Anaerolinea	A265_Methanobacterium	0.7003	0.005	AB	positive	Methanogen-Bacterial decomposer				A36_Methanosarcina	F33_Schizothecium	0.6941	0.0099	AF	positive
B360_Phenylobacterium	A265_Methanobacterium	0.6159	0.0433	AB	positive	Methanogen-Bacterial decomposer				A19_Methanocella	F33_Schizothecium	-0.727	0.0099	AF	negative
B325_Phenylobacterium	A265_Methanobacterium	0.6375	0.0235	AB	positive	Methanogen-Bacterial decomposer				A385_Methanobacterium	F4709_o_NA	0.6382	0.005	AF	positive
A132_Methanosarcina	B176_Phenylobacterium	0.7305	0.005	AB	positive	Methanogen-Bacterial decomposer				A144_Methanobacterium	F4709_o_NA	0.6915	0.005	AF	positive
B1980_Cellulomonas	A144_Methanobacterium	0.6854	0.005	AB	positive	Methanogen-Bacterial decomposer				A281_Methanocella	F751_o_NA	0.6417	0.0137	AF	positive
B912_Phenylobacterium	A51_Methanosaeta	0.7317	0.0137	AB	positive	Methanogen-Bacterial decomposer				A66_Methanosaeta	B6870_Aquicella	0.6127	0.0235	AB	positive
B188_Syntrophus	A31_Methanosaeta	0.6291	0.0297	AB	positive	Methanogen-Syntroph				A21_Methanosarcina	F368_Mortierella	0.8813	0.0099	AF	positive
A265_Methanobacterium	B3956_Syntrophobacter	0.7037	0.0235	AB	positive	Methanogen-Syntroph				A8_Methanobacterium	F368_Mortierella	0.6207	0.0495	AF	positive
A19_Methanocella	B109_Syntrophobacter	0.6562	0.0396	AB	positive	Methanogen-Syntroph				A10_Methanosaeta	F368_Mortierella	-0.6975	0.0198	AF	negative
A10_Methanosaeta	B109_Syntrophobacter	0.642	0.0297	AB	positive	Methanogen-Syntroph				A144_Methanobacterium	F2087_unidentified	0.6559	0.0334	AF	positive
A63_Methanosarcina	B109_Syntrophobacter	0.6786	0.0198	AB	positive	Methanogen-Syntroph				A59_Methanocella	F757_o_NA	0.6182	0.0396	AF	positive
A132_Methanosarcina	B766_Syntrophobacter	0.716	0.0137	AB	positive	Methanogen-Syntroph				A17_Methanobacterium	F1052_o_NA	0.6554	0.0137	AF	positive
A51_Methanosaeta	B5085_Syntrophobacter	0.7171	0.0137	AB	positive	Methanogen-Syntroph				A21_Methanosarcina	F227_o_NA	-0.7121	0.0198	AF	negative
B1698_Syntrophobacter	A66_Methanosaeta	0.7076	0.005	AB	positive	Methanogen-Syntroph				A385_Methanobacterium	B7403_Desulfocapsa	0.6296	0.0137	AB	positive
B1137_Syntrophobacter	A281_Methanocella	0.7337	0.005	AB	positive	Methanogen-Syntroph				A144_Methanobacterium	B7403_Desulfocapsa	0.7036	0.005	AB	positive
B435_Geobacter	A385_Methanobacterium	0.7106	0.005	AB	positive	Methanogen-Non-acetogenic syntroph				A10_Methanosaeta	B1467_uncultured bacterium	-0.6773	0.0297	AB	negative
B1086_Anaeromyxobacter	A17_Methanobacterium	0.7489	0.0235	AB	positive	Methanogen-Non-acetogenic syntroph				A281_Methanocella	F4000_o_NA	0.6221	0.0137	AF	positive
B253_Anaeromyxobacter	A17_Methanobacterium	0.6239	0.005	AB	positive	Methanogen-Non-acetogenic syntroph				A144_Methanobacterium	B2252_Haliangium	0.6068	0.0235	AB	positive
B233_Geobacter	A17_Methanobacterium	0.7615	0.0235	AB	positive	Methanogen-Non-acetogenic syntroph				A144_Methanobacterium	B5463_Fonticella	0.6072	0.0235	AB	positive
A51_Methanosaeta	B260_Anaeromyxobacter	0.7399	0.0137	AB	positive	Methanogen-Non-acetogenic syntroph				A385_Methanobacterium	F1684_o_Leucosporidiales	0.6659	0.0235	AF	positive
A144_Methanobacterium	B435_Geobacter	0.7275	0.0137	AB	positive	Methanogen-Non-acetogenic syntroph				A144_Methanobacterium	F1684_o_Leucosporidiales	0.6618	0.005	AF	positive
A265_Methanobacterium	B573_Anaeromyxobacter	0.7579	0.0137	AB	positive	Methanogen-Non-acetogenic syntroph				A385_Methanobacterium	F112_o_NA	0.6028	0.0137	AF	positive
A281_Methanocella	B2990_Anaeromyxobacter	0.6048	0.005	AB	positive	Methanogen-Non-acetogenic syntroph				A144_Methanobacterium	F112_o_NA	0.6595	0.0137	AF	positive
A132_Methanosarcina	B1133_Anaeromyxobacter	0.7258	0.0137	AB	positive	Methanogen-Non-acetogenic syntroph				A144_Methanobacterium	B9666_o_Myxococcales	0.6785	0.0137	AB	positive
A51_Methanosaeta	B178_Geobacter	0.716	0.0137	AB	positive	Methanogen-Non-acetogenic syntroph				A144_Methanobacterium	F3501_o_NA	0.6353	0.019	AF	positive
B4161_Geobacter	A265_Methanobacterium	0.6821	0.005	AB	positive	Methanogen-Non-acetogenic syntroph				A385_Methanobacterium	A404_uncultured archaeon	0.6058	0.0235	A	positive
A281_Methanocella	B53_Geobacter	-0.8847	0.0495	AB	negative	Methanogen-Non-acetogenic syntroph				A144_Methanobacterium	A404_uncultured archaeon	0.6872	0.005	A	positive
A66_Methanosaeta	B3195_Geobacter	0.6697	0.0235	AB	positive	Methanogen-Non-acetogenic syntroph				A385_Methanobacterium	B11680_uncultured bacterium	0.6319	0.005	AB	positive
B1546_Geobacter	A66_Methanosaeta	0.6535	0.0235	AB	positive	Methanogen-Non-acetogenic syntroph				A21_Methanosarcina	F139_o_NA	-0.812	0.0099	AF	negative
B259_Anaeromyxobacter	A4_Methanosaeta	0.7159	0.0198	AB	positive	Methanogen-Non-acetogenic syntroph				A281_Methanocella	F139_o_NA	-0.736	0.0198	AF	negative
B259_Anaeromyxobacter	A58_Methanobacterium	-0.6513	0.0297	AB	negative	Methanogen-Non-acetogenic syntroph				A10_Methanosaeta	F139_o_NA	0.7155	0.0396	AF	positive
A51_Methanosaeta	B162_Anaeromyxobacter	0.7122	0.0137	AB	positive	Methanogen-Non-acetogenic syntroph				A17_Methanobacterium	A378_uncultured euryarchaeote	0.6764	0.0235	A	positive
A40_Methanosaeta	B1598_Geobacter	0.704	0.0235	AB	positive	Methanogen-Non-acetogenic syntroph				A47_Methanobacterium	B9069_Syntrophorhabdus	0.659	0.0197	AB	positive
B96_Geobacter	A281_Methanocella	0.7805	0.0137	AB	positive	Methanogen-Non-acetogenic syntroph				A47_Methanobacterium	B667_uncultured Prosthecobacter sp.	0.8305	0.0098	AB	positive
A51_Methanosaeta	B3798_Geobacter	0.6262	0.0433	AB	positive	Methanogen-Non-acetogenic syntroph				A21_Methanosarcina	F90_unidentified	0.7898	0.0297	AF	positive
										A10_Methanosaeta	F90_unidentified	-0.8324	0.0297	AF	negative
										A51_Methanosaeta	B5712_f_BIrii41	0.7172	0.005	AB	positive
										A66_Methanosaeta	F1777_unidentified	0.6132	0.0334	AF	positive
										A58_Methanobacterium	F162_unidentified	0.6468	0.0198	AF	positive
										A385_Methanobacterium	B8127_metagenome	0.6225	0.005	AB	positive
										A144_Methanobacterium	B8127_metagenome	0.6753	0.0334	AB	positive
										A12_Methanobacterium	B933_uncultured Chlorobiales bacterium	0.6011	0.0396	AB	positive
										A10_Methanosaeta	B933_uncultured Chlorobiales bacterium	0.6034	0.0198	AB	positive
										A40_Methanosaeta	A177_o_NA	0.6787	0.005	A	positive
										A58_Methanobacterium	B2783_uncultured Spirochaetales bacterium	0.6367	0.0495	AB	positive
										A40_Methanosaeta	B5388_Methylosarcina	0.7117	0.0137	AB	positive
										A58_Methanobacterium	B1357_Anaerolinea	0.6747	0.0099	AB	positive
										A385_Methanobacterium	B6373_Phaselicystis	0.6148	0.0137	AB	positive
										A144_Methanobacterium	B6373_Phaselicystis	0.6625	0.0137	AB	positive
										A385_Methanobacterium	A538_Candidatus Diapherotrites archaeon ADurb.Bin253	0.6761	0.0137	A	positive
										A144_Methanobacterium	A538_Candidatus Diapherotrites archaeon ADurb.Bin253	0.6881	0.0137	A	positive
										A47_Methanobacterium	F198_Neodevriesia	0.6689	0.0297	AF	positive
										A19_Methanocella	F198_Neodevriesia	-0.71	0.0396	AF	negative
										A385_Methanobacterium	B1313_o_NA	0.6238	0.005	AB	positive
										A144_Methanobacterium	B1313_o_NA	0.6229	0.0235	AB	positive
										A8_Methanobacterium	B4778_uncultured bacterium	0.632	0.0495	AB	positive
										A265_Methanobacterium	F1700_o_NA	0.681	0.005	AF	positive
										A63_Methanosarcina	B10857_uncultured compost bacterium	0.6471	0.0098	AB	positive
										A63_Methanosarcina	B157_o_RBG-13-54-9	-0.6232	0.0396	AB	negative
										A66_Methanosaeta	B2543_Syntrophorhabdus	0.6651	0.005	AB	positive
										A144_Methanobacterium	B1309_o_NA	0.6246	0.0235	AB	positive
										A40_Methanosaeta	F4155_o_NA	0.6253	0.0137	AF	positive
										A19_Methanocella	F338_Trichomerium	-0.7083	0.0495	AF	negative
										A21_Methanosarcina	B1015_Bryobacter	0.7049	0.0099	AB	positive
										A19_Methanocella	F715_o_NA	0.8518	0.0099	AF	positive
										A66_Methanosaeta	B2450_uncultured Caldilineaceae bacterium	0.6544	0.0235	AB	positive
										A40_Methanosaeta	B6027_uncultured	0.6722	0.0137	AB	positive
										A40_Methanosaeta	A212_o_NA	0.7218	0.0137	A	positive
										A59_Methanocella	F968_unidentified	0.6398	0.0197	AF	positive
										A132_Methanosarcina	B4655_Coxiella	0.6397	0.0235	AB	positive
										A21_Methanosarcina	B3464_uncultured bacterium	0.6964	0.0099	AB	positive
										A40_Methanosaeta	B1314_Leptolinea	0.6311	0.0235	AB	positive
										A40_Methanosaeta	B5633_uncultured	0.6733	0.0137	AB	positive
										A265_Methanobacterium	B2421_uncultured soil bacterium	0.6407	0.0137	AB	positive
										A51_Methanosaeta	A550_uncultured archaeon	0.6541	0.005	A	positive
										A51_Methanosaeta	F1330_o_NA	0.6298	0.005	AF	positive
										A40_Methanosaeta	B2307_uncultured	0.6182	0.0137	AB	positive
										A144_Methanobacterium	B2314_uncultured bacterium SJA-22	0.6146	0.0235	AB	positive
										A17_Methanobacterium	B10942_Coxiella	0.6181	0.005	AB	positive
										A281_Methanocella	F1702_o_NA	0.6174	0.0098	AF	positive
										A132_Methanosarcina	B3424_uncultured Gemmatimonadetes bacterium	0.6716	0.0137	AB	positive
										A47_Methanobacterium	B2494_uncultured Anaerolineaceae bacterium	0.648	0.0197	AB	positive
										A17_Methanobacterium	F1185_o_NA	-0.7764	0.0099	AF	negative
										A132_Methanosarcina	F51_o_Helotiales	0.8316	0.0099	AF	positive
										A63_Methanosarcina	F215_unidentified	0.6398	0.0495	AF	positive
										A40_Methanosaeta	B4872_Haliangium	0.6802	0.005	AB	positive
										A385_Methanobacterium	A503_uncultured archaeon	0.6579	0.005	A	positive
										A144_Methanobacterium	A503_uncultured archaeon	0.6771	0.0235	A	positive
										F54_unidentified	A31_Methanosaeta	0.6304	0.0495	AF	positive
										B148_uncultured bacterium SHD-71	A31_Methanosaeta	-0.7516	0.0099	AB	negative
										F297_unidentified	A31_Methanosaeta	-0.816	0.0198	AF	negative
										F217_o_NA	A31_Methanosaeta	-0.7397	0.0099	AF	negative
										F35_o_Agaricales	A31_Methanosaeta	-0.7431	0.0396	AF	negative
										B487_f_Holophagaceae	A31_Methanosaeta	0.7465	0.0495	AB	positive
										B1114_Clostridium sensu stricto 9	A31_Methanosaeta	0.6597	0.0297	AB	positive
										F206_o_NA	A31_Methanosaeta	-0.6567	0.0297	AF	negative
										B1930_uncultured Gemmatimonadetes bacterium	A31_Methanosaeta	0.7682	0.0099	AB	positive
										B149_uncultured Ferrimicrobium sp.	A31_Methanosaeta	0.6396	0.0396	AB	positive
										A21_Methanosarcina	A31_Methanosaeta	-0.6591	0.0396	A	negative
										B241_Ferruginibacter	A31_Methanosaeta	-0.7077	0.0297	AB	negative
										B277_Desulfatiglans	A31_Methanosaeta	0.6612	0.0099	AB	positive
										B155_Mycobacterium	A31_Methanosaeta	0.7106	0.0198	AB	positive
										B188_Syntrophus	A31_Methanosaeta	0.6291	0.0297	AB	positive
										B746_Candidatus Udaeobacter	A31_Methanosaeta	0.6908	0.0198	AB	positive
										B774_uncultured Acidobacteria bacterium	A31_Methanosaeta	0.6362	0.0297	AB	positive
										B38_uncultured Sphingobacteriales bacterium	A31_Methanosaeta	0.773	0.0396	AB	positive
										B424_uncultured	A31_Methanosaeta	-0.8845	0.0198	AB	negative
										B529_Fodinicola	A31_Methanosaeta	0.7157	0.0495	AB	positive
										B184_Candidatus Nitrotoga	A31_Methanosaeta	0.7238	0.0297	AB	positive
										F199_unidentified	A31_Methanosaeta	-0.6715	0.0297	AF	negative
										A59_Methanocella	F603_unidentified	0.8154	0.0098	AF	positive
										A40_Methanosaeta	F1471_o_NA	0.6872	0.005	AF	positive
										A66_Methanosaeta	F40_o_NA	0.7816	0.0198	AF	positive
										A36_Methanosarcina	F982_o_NA	0.7099	0.0098	AF	positive
										A281_Methanocella	B12607_Aquisphaera	0.6207	0.005	AB	positive
										A10_Methanosaeta	F45_o_NA	-0.6514	0.0198	AF	negative
										A63_Methanosarcina	F45_o_NA	-0.7039	0.0396	AF	negative
										A40_Methanosaeta	B3167_Anaerolinea	0.6067	0.019	AB	positive
										A47_Methanobacterium	F983_Cryptococcus	0.687	0.0099	AF	positive
										A21_Methanosarcina	F54_unidentified	-0.8964	0.0099	AF	negative
										A10_Methanosaeta	F54_unidentified	0.783	0.0198	AF	positive
										A281_Methanocella	A601_o_NA	0.7208	0.005	A	positive
										A265_Methanobacterium	B3956_Syntrophobacter	0.7037	0.0235	AB	positive
										A17_Methanobacterium	B1599_uncultured bacterium	0.6017	0.005	AB	positive
										A12_Methanobacterium	F511_o_NA	-0.7342	0.0396	AF	negative
										A19_Methanocella	F511_o_NA	-0.789	0.0396	AF	negative
										A10_Methanosaeta	F511_o_NA	-0.6221	0.0396	AF	negative
										A63_Methanosarcina	F511_o_NA	-0.6894	0.0198	AF	negative
										A8_Methanobacterium	F3765_unidentified	0.6039	0.0297	AF	positive
										A144_Methanobacterium	B1152_Anaerolinea	0.7079	0.005	AB	positive
										A36_Methanosarcina	F2865_o_NA	0.6377	0.0297	AF	positive
										A132_Methanosarcina	F1173_unidentified	0.6485	0.0334	AF	positive
										A63_Methanosarcina	B2817_uncultured bacterium	0.714	0.0197	AB	positive
										A59_Methanocella	F1982_unidentified	0.7332	0.0098	AF	positive
										A17_Methanobacterium	F197_o_NA	-0.862	0.0297	AF	negative
										A385_Methanobacterium	B5338_Coxiella	0.6225	0.0137	AB	positive
										A385_Methanobacterium	B591_o_NA	0.6537	0.0334	AB	positive
										A144_Methanobacterium	B591_o_NA	0.7556	0.0137	AB	positive
										A63_Methanosarcina	F1817_unidentified	0.6378	0.0495	AF	positive
										A66_Methanosaeta	B8214_Phenylobacterium	0.6446	0.0137	AB	positive
										A36_Methanosarcina	F138_Rhizophydium	0.6662	0.0198	AF	positive
										A265_Methanobacterium	F2936_o_NA	0.6929	0.005	AF	positive
										A281_Methanocella	F3890_o_NA	0.6602	0.0235	AF	positive
										A17_Methanobacterium	B1178_uncultured Chloroflexi bacterium	0.6419	0.005	AB	positive
										A36_Methanosarcina	B3445_uncultured bacterium	0.6497	0.0297	AB	positive
										A40_Methanosaeta	B8658_f_Pirellulaceae	0.6865	0.005	AB	positive
										A144_Methanobacterium	F1289_Blastobotrys	0.6125	0.0235	AF	positive
										A385_Methanobacterium	A206_o_NA	0.6874	0.005	A	positive
										A144_Methanobacterium	A206_o_NA	0.7354	0.0137	A	positive
										A17_Methanobacterium	F20_Mortierella	0.6172	0.0495	AF	positive
										A63_Methanosarcina	F20_Mortierella	0.6744	0.0297	AF	positive
										A17_Methanobacterium	B967_uncultured bacterium	0.6642	0.005	AB	positive
										A12_Methanobacterium	B996_f_Polyangiaceae	-0.7111	0.0198	AB	negative
										A10_Methanosaeta	B996_f_Polyangiaceae	-0.775	0.0198	AB	negative
										A4_Methanosaeta	B1876_o_NA	-0.6411	0.0495	AB	negative
										A58_Methanobacterium	B1876_o_NA	0.7107	0.0396	AB	positive
										A17_Methanobacterium	B1435_uncultured bacterium	0.6077	0.0235	AB	positive
										A132_Methanosarcina	B1207_uncultured bacterium	0.62	0.005	AB	positive
										A281_Methanocella	B5179_Bdellovibrio	0.6124	0.0137	AB	positive
										A51_Methanosaeta	F1953_o_NA	0.7201	0.005	AF	positive
										A36_Methanosarcina	B2320_f_WD2101 soil group	0.6705	0.0198	AB	positive
										A17_Methanobacterium	A444_uncultured archaeon	0.7141	0.005	A	positive
										A12_Methanobacterium	F87_Exophiala	-0.8384	0.0099	AF	negative
										A19_Methanocella	F87_Exophiala	-0.6948	0.0099	AF	negative
										A144_Methanobacterium	B1968_uncultured bacterium	0.622	0.0334	AB	positive
										A40_Methanosaeta	A277_uncultured archaeon	0.664	0.005	A	positive
										A17_Methanobacterium	A927_uncultured euryarchaeote	0.6153	0.0235	A	positive
										A40_Methanosaeta	B2927_uncultured bacterium	0.6083	0.0137	AB	positive
										A8_Methanobacterium	B1634_Desulfomonile	0.6279	0.0297	AB	positive
										A10_Methanosaeta	F576_unidentified	0.6557	0.0396	AF	positive
										A12_Methanobacterium	F145_o_NA	0.7283	0.0198	AF	positive
										A19_Methanocella	F145_o_NA	0.7274	0.0198	AF	positive
										A63_Methanosarcina	F145_o_NA	0.7404	0.0099	AF	positive
										A132_Methanosarcina	B4478_uncultured proteobacterium	0.7573	0.005	AB	positive
										A63_Methanosarcina	F39_Mrakiella	0.7981	0.0099	AF	positive
										A385_Methanobacterium	B7206_uncultured bacterium	0.6082	0.005	AB	positive
										A144_Methanobacterium	B7206_uncultured bacterium	0.6299	0.0235	AB	positive
										A17_Methanobacterium	F5301_unidentified	0.6306	0.005	AF	positive
										A66_Methanosaeta	B8831_uncultured bacterium KF-JG30-B11	0.616	0.0137	AB	positive
										A281_Methanocella	F467_unidentified	0.6626	0.005	AF	positive
										A36_Methanosarcina	F889_unidentified	-0.6257	0.0297	AF	negative
										A17_Methanobacterium	A294_o_NA	0.7765	0.0137	A	positive
										A17_Methanobacterium	A495_o_NA	0.7494	0.005	A	positive
										A17_Methanobacterium	B4339_Pedosphaera	0.645	0.005	AB	positive
										A281_Methanocella	B1230_Phenylobacterium	0.6674	0.0235	AB	positive
										A66_Methanosaeta	B7326_Haliangium	0.6724	0.0137	AB	positive
										A144_Methanobacterium	F6494_o_NA	0.6298	0.0137	AF	positive
										A132_Methanosarcina	A269_uncultured euryarchaeote	0.749	0.0137	A	positive
										A51_Methanosaeta	F1325_o_NA	0.7266	0.005	AF	positive
										A51_Methanosaeta	B3231_o_Betaproteobacteriales	0.6779	0.005	AB	positive
										A66_Methanosaeta	B8495_Pir2 lineage	0.6245	0.005	AB	positive
										A51_Methanosaeta	B5391_o_OPB41	0.7312	0.0137	AB	positive
										A66_Methanosaeta	B2425_Paludibaculum	0.6024	0.0235	AB	positive
										A21_Methanosarcina	F239_o_NA	-0.6144	0.0396	AF	negative
										A10_Methanosaeta	F239_o_NA	0.7771	0.0198	AF	positive
										A51_Methanosaeta	B1398_Leptolinea	0.6692	0.0137	AB	positive
										A132_Methanosarcina	B4570_o_NA	0.6921	0.005	AB	positive
										A40_Methanosaeta	F293_unidentified	-0.6933	0.0198	AF	negative
										A4_Methanosaeta	F668_o_NA	0.7585	0.0099	AF	positive
										A385_Methanobacterium	B1400_o_Aminicenantales	0.6101	0.005	AB	positive
										A144_Methanobacterium	B1400_o_Aminicenantales	0.6962	0.005	AB	positive
										A12_Methanobacterium	F1782_unidentified	0.6419	0.0297	AF	positive
										A51_Methanosaeta	F4192_unidentified	0.6118	0.0235	AF	positive
										A40_Methanosaeta	B4780_uncultured bacterium	0.6628	0.005	AB	positive
										A385_Methanobacterium	F248_unidentified	-0.6216	0.0396	AF	negative
										A10_Methanosaeta	B183_f_uncultured	-0.728	0.0297	AB	negative
										A385_Methanobacterium	F26_unidentified	-0.6869	0.0198	AF	negative
										A12_Methanobacterium	F26_unidentified	-0.7748	0.0297	AF	negative
										A144_Methanobacterium	F26_unidentified	-0.7771	0.0396	AF	negative
										A19_Methanocella	F26_unidentified	-0.6766	0.0297	AF	negative
										A385_Methanobacterium	B317_uncultured bacterium	-0.6283	0.0297	AB	negative
										A144_Methanobacterium	B317_uncultured bacterium	-0.6404	0.0495	AB	negative
										A51_Methanosaeta	F4037_o_NA	0.709	0.005	AF	positive
										A17_Methanobacterium	F1121_o_NA	0.6001	0.019	AF	positive
										A59_Methanocella	F1478_unidentified	0.7663	0.0098	AF	positive
										A17_Methanobacterium	B2767_uncultured Verrucomicrobia bacterium	0.6919	0.0235	AB	positive
										A17_Methanobacterium	A304_uncultured euryarchaeote	0.7479	0.005	A	positive
										A132_Methanosarcina	B2789_ADurb.Bin063-1	0.6806	0.0137	AB	positive
										A17_Methanobacterium	B1112_uncultured proteobacterium	0.6242	0.005	AB	positive
										A66_Methanosaeta	A238_o_NA	0.6387	0.0137	A	positive
										A144_Methanobacterium	B3106_f_Pirellulaceae	0.6391	0.0334	AB	positive
										A66_Methanosaeta	F4369_o_NA	0.6415	0.005	AF	positive
										A63_Methanosarcina	F1417_o_NA	0.6914	0.0297	AF	positive
										A66_Methanosaeta	F456_o_NA	0.6276	0.0334	AF	positive
										A281_Methanocella	A554_uncultured archaeon	0.6501	0.0235	A	positive
										A17_Methanobacterium	F922_o_NA	0.6116	0.005	AF	positive
										A144_Methanobacterium	B9199_Anaerolinea	0.6166	0.0334	AB	positive
										A12_Methanobacterium	F677_Kurtzmanomyces	-0.6925	0.0396	AF	negative
										A58_Methanobacterium	F677_Kurtzmanomyces	0.6938	0.0297	AF	positive
										A21_Methanosarcina	F714_unidentified	0.6334	0.0495	AF	positive
										A19_Methanocella	B109_Syntrophobacter	0.6562	0.0396	AB	positive
										A10_Methanosaeta	B109_Syntrophobacter	0.642	0.0297	AB	positive
										A63_Methanosarcina	B109_Syntrophobacter	0.6786	0.0198	AB	positive
										A385_Methanobacterium	F6549_unidentified	0.6004	0.005	AF	positive
										A385_Methanobacterium	A367_o_NA	0.6476	0.0235	A	positive
										A144_Methanobacterium	A367_o_NA	0.6844	0.0235	A	positive
										A17_Methanobacterium	B7235_o_NA	0.6456	0.0137	AB	positive
										A281_Methanocella	F2278_unidentified	0.6585	0.0334	AF	positive
										A10_Methanosaeta	B835_uncultured bacterium	0.7543	0.0198	AB	positive
										A132_Methanosarcina	F5664_o_NA	0.6312	0.005	AF	positive
										A36_Methanosarcina	B1490_o_NA	0.6593	0.0098	AB	positive
										A51_Methanosaeta	A344_uncultured euryarchaeote	0.6952	0.0137	A	positive
										A12_Methanobacterium	F1036_o_NA	0.6604	0.0198	AF	positive
										A19_Methanocella	F1036_o_NA	0.6659	0.0198	AF	positive
										A17_Methanobacterium	B407_o_SJA-15	0.6649	0.0091	AB	positive
										A17_Methanobacterium	F8_unidentified	-0.829	0.0198	AF	negative
										A12_Methanobacterium	F192_unidentified	-0.643	0.0099	AF	negative
										A19_Methanocella	F192_unidentified	-0.6847	0.0198	AF	negative
										A51_Methanosaeta	F1905_o_Capnodiales	0.6469	0.0137	AF	positive
										A21_Methanosarcina	F702_o_NA	0.615	0.0495	AF	positive
										A66_Methanosaeta	B2451_f_Pedosphaeraceae	0.6086	0.0235	AB	positive
										A47_Methanobacterium	F784_Tetraplosphaeria	0.7586	0.0098	AF	positive
										A51_Methanosaeta	F4044_unidentified	0.6804	0.005	AF	positive
										A385_Methanobacterium	B4531_uncultured	0.6784	0.0235	AB	positive
										A144_Methanobacterium	B4531_uncultured	0.7095	0.0137	AB	positive
										A265_Methanobacterium	B6030_f_Chthoniobacteraceae	0.6203	0.0334	AB	positive
										A17_Methanobacterium	A406_uncultured archaeon	0.7312	0.0137	A	positive
										A17_Methanobacterium	F925_o_NA	0.6056	0.0137	AF	positive
										A59_Methanocella	B1670_uncultured bacterium	0.7017	0.0197	AB	positive
										A40_Methanosaeta	B1771_o_NA	0.6503	0.0137	AB	positive
										A51_Methanosaeta	F5047_o_NA	0.6253	0.005	AF	positive
										A17_Methanobacterium	F439_o_NA	0.78	0.0099	AF	positive
										A63_Methanosarcina	F439_o_NA	0.718	0.0198	AF	positive
										A36_Methanosarcina	F2102_o_NA	0.6221	0.0099	AF	positive
										A132_Methanosarcina	B1444_Aquicella	0.6147	0.0137	AB	positive
										A21_Methanosarcina	B1863_o_NA	-0.8523	0.0099	AB	negative
										A10_Methanosaeta	B1863_o_NA	0.7457	0.0297	AB	positive
										A132_Methanosarcina	F445_f_Psathyrellaceae	0.757	0.0235	AF	positive
										A51_Methanosaeta	F1419_o_NA	0.6371	0.005	AF	positive
										A51_Methanosaeta	F270_o_NA	0.7004	0.005	AF	positive
										A385_Methanobacterium	B3731_o_NA	0.6266	0.005	AB	positive
										A144_Methanobacterium	B3731_o_NA	0.6376	0.0137	AB	positive
										A51_Methanosaeta	B553_uncultured	0.6827	0.005	AB	positive
										A17_Methanobacterium	B3820_f_P3OB-42	0.6114	0.0137	AB	positive
										A66_Methanosaeta	F3338_o_NA	0.6075	0.0137	AF	positive
										A40_Methanosaeta	F501_unidentified	0.6068	0.019	AF	positive
										A63_Methanosarcina	F501_unidentified	0.7426	0.0197	AF	positive
										A51_Methanosaeta	F4803_unidentified	0.6332	0.005	AF	positive
										A385_Methanobacterium	F566_unidentified	0.7417	0.005	AF	positive
										A144_Methanobacterium	F566_unidentified	0.7548	0.005	AF	positive
										A281_Methanocella	F4594_unidentified	0.6048	0.0137	AF	positive
										A385_Methanobacterium	A79_uncultured marine crenarchaeote E6-3G	0.7593	0.0137	A	positive
										A144_Methanobacterium	A79_uncultured marine crenarchaeote E6-3G	0.7646	0.0235	A	positive
										A385_Methanobacterium	A1004_o_NA	0.608	0.0137	A	positive
										A144_Methanobacterium	A1004_o_NA	0.6874	0.005	A	positive
										A281_Methanocella	B5181_f_Acetobacteraceae	0.7509	0.005	AB	positive
										A66_Methanosaeta	F2640_o_NA	0.7059	0.005	AF	positive
										A132_Methanosarcina	B2035_uncultured bacterium	0.6623	0.0235	AB	positive
										A19_Methanocella	B1589_uncultured Desulfuromonadales bacterium	0.6227	0.0396	AB	positive
										A17_Methanobacterium	B6652_o_Myxococcales	0.6322	0.0235	AB	positive
										A66_Methanosaeta	B1597_metagenome	0.6818	0.0433	AB	positive
										A265_Methanobacterium	F3259_o_Capnodiales	0.6748	0.0137	AF	positive
										A17_Methanobacterium	B7292_Desulfomonile	0.6404	0.0137	AB	positive
										A40_Methanosaeta	B5218_Leptolinea	0.6359	0.005	AB	positive
										A12_Methanobacterium	F77_unidentified	-0.6113	0.0495	AF	negative
										A132_Methanosarcina	F77_unidentified	0.6067	0.0297	AF	positive
										A63_Methanosarcina	F77_unidentified	-0.7496	0.0099	AF	negative
										A281_Methanocella	F4596_o_NA	0.6053	0.0137	AF	positive
										A17_Methanobacterium	A721_uncultured archaeon	0.6146	0.0235	A	positive
										A63_Methanosarcina	B7127_uncultured	0.6798	0.0296	AB	positive
										A63_Methanosarcina	B4002_uncultured bacterium	0.6314	0.0296	AB	positive
										A51_Methanosaeta	B3938_uncultured prokaryote	0.7202	0.0137	AB	positive
										A17_Methanobacterium	B12642_o_NA	0.6125	0.005	AB	positive
										A265_Methanobacterium	F1624_o_NA	0.6659	0.0235	AF	positive
										A385_Methanobacterium	F55_o_NA	-0.7008	0.0297	AF	negative
										A12_Methanobacterium	F55_o_NA	-0.7777	0.0198	AF	negative
										A144_Methanobacterium	F55_o_NA	-0.7234	0.0099	AF	negative
										A10_Methanosaeta	F55_o_NA	-0.662	0.0495	AF	negative
										A40_Methanosaeta	F107_unidentified	0.7368	0.0198	AF	positive
										A51_Methanosaeta	B1717_o_NA	0.6274	0.0137	AB	positive
										A47_Methanobacterium	F344_unidentified	0.623	0.0495	AF	positive
										A21_Methanosarcina	F344_unidentified	0.7341	0.0198	AF	positive
										A10_Methanosaeta	F344_unidentified	-0.8812	0.0099	AF	negative
										A40_Methanosaeta	B6848_Nocardioides	0.6856	0.005	AB	positive
										A281_Methanocella	F1501_o_NA	0.609	0.0137	AF	positive
										A40_Methanosaeta	B2897_o_NA	0.6009	0.0235	AB	positive
										A12_Methanobacterium	F343_unidentified	-0.8284	0.0297	AF	negative
										A10_Methanosaeta	F343_unidentified	-0.7616	0.0198	AF	negative
										A10_Methanosaeta	B148_uncultured bacterium SHD-71	-0.6203	0.0396	AB	negative
										A40_Methanosaeta	B1009_uncultured bacterium	0.6361	0.005	AB	positive
										A19_Methanocella	F242_o_NA	0.7698	0.0297	AF	positive
										A63_Methanosarcina	F242_o_NA	0.8377	0.0099	AF	positive
										A281_Methanocella	F5077_f_Cortinariaceae	0.7068	0.0137	AF	positive
										A36_Methanosarcina	F260_unidentified	-0.866	0.0198	AF	negative
										A66_Methanosaeta	F260_unidentified	-0.6081	0.0297	AF	negative
										A4_Methanosaeta	F260_unidentified	0.6935	0.0297	AF	positive
										A17_Methanobacterium	F5_Schizothecium	0.6651	0.0099	AF	positive
										A8_Methanobacterium	F5_Schizothecium	0.7608	0.0099	AF	positive
										A19_Methanocella	F134_unidentified	-0.6893	0.0297	AF	negative
										A132_Methanosarcina	F514_unidentified	0.6482	0.0235	AF	positive
										A19_Methanocella	B868_uncultured Caldilineaceae bacterium	-0.7195	0.0099	AB	negative
										A17_Methanobacterium	B3834_Coxiella	0.6069	0.0235	AB	positive
										A40_Methanosaeta	F2282_o_NA	0.6836	0.0388	AF	positive
										A63_Methanosarcina	F2282_o_NA	0.7508	0.0197	AF	positive
										A63_Methanosarcina	F1175_unidentified	0.6863	0.0098	AF	positive
										A51_Methanosaeta	B1056_f_Pedosphaeraceae	0.6015	0.0137	AB	positive
										A59_Methanocella	F297_unidentified	-0.7042	0.0297	AF	negative
										A63_Methanosarcina	B1969_uncultured Chloroflexi bacterium	0.6763	0.0099	AB	positive
										A385_Methanobacterium	B2600_uncultured	0.6357	0.0235	AB	positive
										A144_Methanobacterium	B2600_uncultured	0.6554	0.0137	AB	positive
										A17_Methanobacterium	F25_o_Pleosporales	-0.7976	0.0099	AF	negative
										A19_Methanocella	F25_o_Pleosporales	-0.7379	0.0198	AF	negative
										A63_Methanosarcina	F25_o_Pleosporales	-0.7587	0.0297	AF	negative
										A47_Methanobacterium	F3661_unidentified	0.6496	0.0198	AF	positive
										A132_Methanosarcina	B2099_o_Aminicenantales	0.6114	0.005	AB	positive
										A385_Methanobacterium	F3550_Glaciozyma	0.6369	0.0137	AF	positive
										A144_Methanobacterium	F3550_Glaciozyma	0.7014	0.0433	AF	positive
										A47_Methanobacterium	F3664_unidentified	0.6417	0.0197	AF	positive
										A132_Methanosarcina	F3664_unidentified	0.6312	0.019	AF	positive
										A59_Methanocella	F493_o_NA	-0.6671	0.0297	AF	negative
										A40_Methanosaeta	F1729_o_NA	0.7699	0.005	AF	positive
										A17_Methanobacterium	A106_uncultured euryarchaeote	0.6043	0.0487	A	positive
										A12_Methanobacterium	A106_uncultured euryarchaeote	0.699	0.0396	A	positive
										A4_Methanosaeta	A106_uncultured euryarchaeote	0.6135	0.0198	A	positive
										A63_Methanosarcina	B1173_uncultured bacterium	0.6205	0.0198	AB	positive
										A265_Methanobacterium	F83_o_NA	0.6273	0.0388	AF	positive
										A12_Methanobacterium	F646_o_NA	0.6522	0.0495	AF	positive
										A63_Methanosarcina	F150_Cyphellophora	-0.897	0.0099	AF	negative
										A281_Methanocella	A220_o_NA	0.7899	0.0137	A	positive
										A21_Methanosarcina	F1040_o_NA	0.658	0.0198	AF	positive
										A8_Methanobacterium	F1040_o_NA	0.6238	0.0495	AF	positive
										A17_Methanobacterium	A136_o_NA	0.7103	0.005	A	positive
										A40_Methanosaeta	F640_o_NA	0.6451	0.005	AF	positive
										A17_Methanobacterium	B3319_Deferrisoma	0.6328	0.0289	AB	positive
										A281_Methanocella	F515_o_Pleosporales	0.6142	0.0395	AF	positive
										A40_Methanosaeta	B1857_uncultured	0.6566	0.0137	AB	positive
										A59_Methanocella	F11_unidentified	0.7115	0.0198	AF	positive
										A281_Methanocella	A333_o_NA	0.7047	0.005	A	positive
										A40_Methanosaeta	F184_o_Sordariales	0.7106	0.0235	AF	positive
										A281_Methanocella	B2030_uncultured bacterium	0.6364	0.005	AB	positive
										A40_Methanosaeta	B5600_uncultured bacterium	0.6231	0.0235	AB	positive
										A17_Methanobacterium	B438_uncultured	0.7426	0.005	AB	positive
										A59_Methanocella	B3217_o_NA	0.6263	0.0098	AB	positive
										A385_Methanobacterium	B3254_f_BSV26	0.6627	0.005	AB	positive
										A144_Methanobacterium	B3254_f_BSV26	0.7053	0.005	AB	positive
										A21_Methanosarcina	F35_o_Agaricales	0.9383	0.0099	AF	positive
										A281_Methanocella	F35_o_Agaricales	0.6233	0.0297	AF	positive
										A10_Methanosaeta	F35_o_Agaricales	-0.7203	0.0495	AF	negative
										A63_Methanosarcina	F137_o_NA	-0.7546	0.0099	AF	negative
										A385_Methanobacterium	F2319_o_NA	0.635	0.0137	AF	positive
										A144_Methanobacterium	F2319_o_NA	0.7007	0.005	AF	positive
										A63_Methanosarcina	F72_o_NA	0.7919	0.0098	AF	positive
										A10_Methanosaeta	F127_Oberwinklerozyma	0.6103	0.0396	AF	positive
										A63_Methanosarcina	F127_Oberwinklerozyma	0.8752	0.0099	AF	positive
										A385_Methanobacterium	B5969_o_NA	0.6772	0.005	AB	positive
										A144_Methanobacterium	B5969_o_NA	0.6822	0.0137	AB	positive
										A281_Methanocella	B8507_uncultured Gemmatimonadetes bacterium	0.6119	0.005	AB	positive
										A144_Methanobacterium	B13377_uncultured	0.6045	0.0137	AB	positive
										A144_Methanobacterium	B486_f_Lentimicrobiaceae	0.7094	0.0137	AB	positive
										A63_Methanosarcina	F807_unidentified	0.7158	0.0098	AF	positive
										A66_Methanosaeta	B9699_wastewater metagenome	0.6064	0.0334	AB	positive
										A17_Methanobacterium	B281_uncultured Gemmatimonadetes bacterium	0.762	0.005	AB	positive
										A40_Methanosaeta	F384_Glaciozyma	0.7027	0.0289	AF	positive
										A10_Methanosaeta	F558_unidentified	-0.6954	0.0099	AF	negative
										A66_Methanosaeta	F2539_o_NA	0.6297	0.0137	AF	positive
										A47_Methanobacterium	B4220_o_NA	0.7144	0.0098	AB	positive
										A385_Methanobacterium	B2384_Spirochaeta 2	0.6146	0.0137	AB	positive
										A144_Methanobacterium	B2384_Spirochaeta 2	0.6264	0.0137	AB	positive
										A40_Methanosaeta	F2321_o_NA	0.6104	0.0137	AF	positive
										A144_Methanobacterium	B410_uncultured	-0.6384	0.0297	AB	negative
										A385_Methanobacterium	F3671_unidentified	0.6567	0.0137	AF	positive
										A144_Methanobacterium	F3671_unidentified	0.6867	0.005	AF	positive
										A63_Methanosarcina	F822_unidentified	0.6268	0.0198	AF	positive
										A47_Methanobacterium	B707_f_BIrii41	0.625	0.0396	AB	positive
										A51_Methanosaeta	B4525_o_NA	0.6414	0.005	AB	positive
										A385_Methanobacterium	A96_uncultured euryarchaeote	0.6152	0.0388	A	positive
										A40_Methanosaeta	B3835_uncultured bacterium	0.6612	0.0137	AB	positive
										A385_Methanobacterium	A454_uncultured euryarchaeote	0.7088	0.0235	A	positive
										A144_Methanobacterium	A454_uncultured euryarchaeote	0.7307	0.005	A	positive
										A21_Methanosarcina	F1664_o_NA	0.6098	0.0198	AF	positive
										A281_Methanocella	B431_o_RBG-13-54-9	0.6671	0.005	AB	positive
										A385_Methanobacterium	B6541_Desulfomonile	0.6779	0.005	AB	positive
										A144_Methanobacterium	B6541_Desulfomonile	0.739	0.0137	AB	positive
										A19_Methanocella	B1041_uncultured Streptomyces sp.	0.6968	0.0495	AB	positive
										A47_Methanobacterium	F385_o_Sordariales	0.75	0.0099	AF	positive
										A144_Methanobacterium	B5799_uncultured soil bacterium	0.6714	0.005	AB	positive
										A40_Methanosaeta	B161_o_NA	-0.814	0.0297	AB	negative
										A63_Methanosarcina	B161_o_NA	-0.6656	0.0297	AB	negative
										A385_Methanobacterium	B9701_Virgisporangium	0.6166	0.0137	AB	positive
										A144_Methanobacterium	B9701_Virgisporangium	0.6024	0.0137	AB	positive
										A51_Methanosaeta	B616_uncultured Desulfuromonadales bacterium	0.7403	0.0137	AB	positive
										A281_Methanocella	B368_Alsobacter	0.6883	0.0137	AB	positive
										A17_Methanobacterium	B825_Ignavibacterium	0.6958	0.0235	AB	positive
										B313_uncultured bacterium	A385_Methanobacterium	-0.8323	0.0198	AB	negative
										B88_o_NA	A385_Methanobacterium	-0.8201	0.0099	AB	negative
										B4899_Desulforhabdus	A385_Methanobacterium	0.63	0.0137	AB	positive
										B435_Geobacter	A385_Methanobacterium	0.7106	0.005	AB	positive
										B4496_f_Ruminococcaceae	A385_Methanobacterium	0.6236	0.0334	AB	positive
										B175_ADurb.Bin063-1	A385_Methanobacterium	0.702	0.005	AB	positive
										B1358_f_Solibacteraceae (Subgroup 3)	A385_Methanobacterium	0.6645	0.0137	AB	positive
										A98_uncultured archaeon	A385_Methanobacterium	0.7285	0.005	A	positive
										B2415_uncultured soil bacterium PBS-III-20	A385_Methanobacterium	0.661	0.005	AB	positive
										B45_f_Blastocatellaceae	A385_Methanobacterium	0.6281	0.0137	AB	positive
										F2249_o_NA	A385_Methanobacterium	0.6788	0.005	AF	positive
										F3188_o_NA	A385_Methanobacterium	0.6361	0.0137	AF	positive
										B3849_Conexibacter	A385_Methanobacterium	0.6545	0.0137	AB	positive
										F728_unidentified	A385_Methanobacterium	0.6537	0.005	AF	positive
										B8582_GOUTA6	A385_Methanobacterium	0.6252	0.0137	AB	positive
										B847_Ferruginibacter	A385_Methanobacterium	0.6889	0.0137	AB	positive
										F13_Schizothecium	A385_Methanobacterium	-0.79	0.0099	AF	negative
										B4241_Candidatus Solibacter	A385_Methanobacterium	0.7083	0.0137	AB	positive
										B322_o_SJA-15	A385_Methanobacterium	0.6669	0.0137	AB	positive
										A144_Methanobacterium	A385_Methanobacterium	0.7893	0.0137	A	positive
										B904_uncultured	A385_Methanobacterium	0.6151	0.0235	AB	positive
										B3924_o_SBR1031	A385_Methanobacterium	0.6497	0.0137	AB	positive
										B264_Thiobacillus	A385_Methanobacterium	0.7155	0.005	AB	positive
										B3391_Subgroup 10	A385_Methanobacterium	0.6155	0.0235	AB	positive
										B1680_Ferribacterium	A385_Methanobacterium	0.6036	0.005	AB	positive
										B2249_uncultured Ferrimicrobium sp.	A385_Methanobacterium	0.6382	0.0137	AB	positive
										B4083_Bryobacter	A385_Methanobacterium	0.6692	0.005	AB	positive
										B79_f_SC-I-84	A385_Methanobacterium	-0.7562	0.0099	AB	negative
										B987_Leptolinea	A385_Methanobacterium	0.638	0.005	AB	positive
										B6278_Pseudomonas	A385_Methanobacterium	0.6333	0.0334	AB	positive
										B1585_uncultured	A385_Methanobacterium	0.6856	0.005	AB	positive
										B2839_Gaiella	A385_Methanobacterium	0.6728	0.0235	AB	positive
										B499_f_Solibacteraceae (Subgroup 3)	A385_Methanobacterium	0.7155	0.0137	AB	positive
										B267_uncultured Prosthecobacter sp.	A385_Methanobacterium	0.7171	0.005	AB	positive
										B141_f_uncultured	A385_Methanobacterium	0.7255	0.005	AB	positive
										B4880_f_Isosphaeraceae	A385_Methanobacterium	0.6165	0.005	AB	positive
										B4576_f_Acidobacteriaceae (Subgroup 1)	A385_Methanobacterium	0.652	0.0137	AB	positive
										B1310_uncultured	A385_Methanobacterium	0.6772	0.005	AB	positive
										B1353_o_Myxococcales	A385_Methanobacterium	0.6363	0.0137	AB	positive
										B348_f_Burkholderiaceae	A385_Methanobacterium	0.6714	0.0137	AB	positive
										B1191_Terrimonas	A385_Methanobacterium	0.6081	0.0137	AB	positive
										B1986_Haliangium	A385_Methanobacterium	0.6178	0.005	AB	positive
										B2317_Gaiella	A385_Methanobacterium	0.6089	0.005	AB	positive
										B8163_Hydrogenispora	A385_Methanobacterium	0.6516	0.005	AB	positive
										B2513_Flavobacterium	A385_Methanobacterium	0.6759	0.0137	AB	positive
										B6021_Rhodoblastus	A385_Methanobacterium	0.6329	0.0137	AB	positive
										B359_o_NA	A385_Methanobacterium	0.6924	0.005	AB	positive
										B1274_Roseomonas	A385_Methanobacterium	0.6276	0.0334	AB	positive
										B7860_uncultured	A385_Methanobacterium	0.6016	0.005	AB	positive
										B1980_Cellulomonas	A385_Methanobacterium	0.6845	0.0235	AB	positive
										B2201_Sphingomonas	A385_Methanobacterium	0.6204	0.005	AB	positive
										B715_Nocardioides	A385_Methanobacterium	0.6277	0.0334	AB	positive
										B805_Rhodoblastus	A385_Methanobacterium	-0.8288	0.0198	AB	negative
										F62_Nigrospora	A385_Methanobacterium	-0.6375	0.0297	AF	negative
										F3721_Mortierella	A385_Methanobacterium	0.6545	0.0137	AF	positive
										F2_Mortierella	A385_Methanobacterium	-0.6121	0.0297	AF	negative
										F67_unidentified	A385_Methanobacterium	0.6403	0.0137	AF	positive
										B1871_Flavisolibacter	A17_Methanobacterium	0.6348	0.0137	AB	positive
										B95_o_RCP2-54	A17_Methanobacterium	-0.818	0.0198	AB	negative
										B1756_uncultured bacterium SJA-36	A17_Methanobacterium	0.6196	0.0235	AB	positive
										A201_uncultured Thermoplasmatales archaeon	A17_Methanobacterium	0.7189	0.0334	A	positive
										B441_Hydrogenispora	A17_Methanobacterium	0.6456	0.0137	AB	positive
										B5369_Ruminiclostridium 1	A17_Methanobacterium	0.6911	0.0137	AB	positive
										A92_Methanomassiliicoccus	A17_Methanobacterium	0.7848	0.005	A	positive
										B3292_o_NA	A17_Methanobacterium	0.6263	0.0334	AB	positive
										B906_f_SC-I-84	A17_Methanobacterium	0.699	0.019	AB	positive
										B382_f_Pedosphaeraceae	A17_Methanobacterium	0.7428	0.005	AB	positive
										B2072_uncultured organism	A17_Methanobacterium	0.6874	0.005	AB	positive
										B7592_Haliangium	A17_Methanobacterium	0.6555	0.0235	AB	positive
										B4042_Candidatus Solibacter	A17_Methanobacterium	0.7576	0.005	AB	positive
										B1473_Pir2 lineage	A17_Methanobacterium	0.6209	0.0137	AB	positive
										F3190_unidentified	A17_Methanobacterium	0.6423	0.0137	AF	positive
										A99_o_NA	A17_Methanobacterium	0.6104	0.0388	A	positive
										F268_o_NA	A17_Methanobacterium	0.6414	0.0137	AF	positive
										B1545_f_Sphingomonadaceae	A17_Methanobacterium	0.6857	0.0137	AB	positive
										B6445_f_Solibacteraceae (Subgroup 3)	A17_Methanobacterium	0.6917	0.0235	AB	positive
										B48_uncultured prokaryote	A17_Methanobacterium	0.7644	0.005	AB	positive
										B2917_uncultured Bacteroidetes bacterium	A17_Methanobacterium	0.6982	0.0334	AB	positive
										B2044_f_Nitrosomonadaceae	A17_Methanobacterium	0.6865	0.005	AB	positive
										B8856_o_NA	A17_Methanobacterium	0.66	0.0137	AB	positive
										F2841_unidentified	A17_Methanobacterium	0.6956	0.005	AF	positive
										B1825_uncultured soil bacterium	A17_Methanobacterium	0.6676	0.0433	AB	positive
										B300_mle1-7	A17_Methanobacterium	-0.6017	0.0396	AB	negative
										B621_o_NA	A17_Methanobacterium	0.6438	0.005	AB	positive
										B111_uncultured delta proteobacterium	A17_Methanobacterium	-0.6683	0.0099	AB	negative
										B1301_Pajaroellobacter	A17_Methanobacterium	0.6747	0.0137	AB	positive
										B1279_ADurb.Bin063-1	A17_Methanobacterium	0.8006	0.0137	AB	positive
										B269_Anaerolinea	A17_Methanobacterium	0.6764	0.0137	AB	positive
										B1111_Phenylobacterium	A17_Methanobacterium	0.7061	0.0334	AB	positive
										B60_uncultured bacterium	A17_Methanobacterium	0.6249	0.005	AB	positive
										B1086_Anaeromyxobacter	A17_Methanobacterium	0.7489	0.0235	AB	positive
										F128_o_NA	A17_Methanobacterium	0.6751	0.0297	AF	positive
										F993_unidentified	A17_Methanobacterium	0.6217	0.0235	AF	positive
										B6092_uncultured bacterium	A17_Methanobacterium	0.6435	0.0334	AB	positive
										F339_unidentified	A17_Methanobacterium	0.7233	0.0235	AF	positive
										B489_f_Gallionellaceae	A17_Methanobacterium	0.6889	0.0137	AB	positive
										B193_Sideroxydans	A17_Methanobacterium	0.6993	0.0137	AB	positive
										B4032_o_Myxococcales	A17_Methanobacterium	0.6219	0.0235	AB	positive
										B5015_f_uncultured	A17_Methanobacterium	0.7469	0.0137	AB	positive
										B5140_Cellulomonas	A17_Methanobacterium	0.7055	0.005	AB	positive
										B509_o_Myxococcales	A17_Methanobacterium	0.6225	0.005	AB	positive
										B711_uncultured prokaryote	A17_Methanobacterium	0.7113	0.0137	AB	positive
										B2015_uncultured	A17_Methanobacterium	0.6163	0.0137	AB	positive
										B1305_o_NA	A17_Methanobacterium	0.762	0.0137	AB	positive
										B108_uncultured prokaryote	A17_Methanobacterium	0.7873	0.005	AB	positive
										B2426_Pedobacter	A17_Methanobacterium	0.7269	0.005	AB	positive
										B7312_Dechloromonas	A17_Methanobacterium	0.6801	0.0137	AB	positive
										B1768_f_uncultured	A17_Methanobacterium	0.6149	0.0334	AB	positive
										B601_f_Nocardioidaceae	A17_Methanobacterium	0.661	0.005	AB	positive
										B253_Anaeromyxobacter	A17_Methanobacterium	0.6239	0.005	AB	positive
										B6864_uncultured	A17_Methanobacterium	0.6809	0.005	AB	positive
										B2893_Occallatibacter	A17_Methanobacterium	0.7011	0.005	AB	positive
										B1431_uncultured Planctomyces sp.	A17_Methanobacterium	0.6882	0.005	AB	positive
										B3162_o_Subgroup 7	A17_Methanobacterium	0.6478	0.005	AB	positive
										B813_metagenome	A17_Methanobacterium	0.6737	0.0137	AB	positive
										B629_o_NA	A17_Methanobacterium	0.7301	0.005	AB	positive
										B4869_Clostridium sensu stricto 10	A17_Methanobacterium	0.6707	0.0137	AB	positive
										A196_Methanospirillum	A17_Methanobacterium	0.7014	0.0137	A	positive
										B217_uncultured	A17_Methanobacterium	0.6144	0.019	AB	positive
										B233_Geobacter	A17_Methanobacterium	0.7615	0.0235	AB	positive
										B385_uncultured	A17_Methanobacterium	0.6403	0.005	AB	positive
										B1777_uncultured Syntrophobacteraceae bacterium	A17_Methanobacterium	0.6701	0.005	AB	positive
										B3340_f_Desulfobulbaceae	A17_Methanobacterium	0.6414	0.0334	AB	positive
										B451_f_uncultured	A17_Methanobacterium	0.7373	0.0235	AB	positive
										A63_Methanosarcina	A17_Methanobacterium	0.6118	0.019	A	positive
										B1592_f_Burkholderiaceae	A17_Methanobacterium	0.7281	0.005	AB	positive
										B6259_o_OPB41	A17_Methanobacterium	0.6638	0.0334	AB	positive
										A82_Candidatus Nitrosoarchaeum	A17_Methanobacterium	0.7239	0.005	A	positive
										F183_Mortierella	A17_Methanobacterium	0.731	0.0137	AF	positive
										F46_Arnium	A17_Methanobacterium	-0.635	0.0396	AF	negative
										F245_Plectosphaerella	A17_Methanobacterium	0.7001	0.0091	AF	positive
										F502_Cyphellophora	A17_Methanobacterium	0.6918	0.0235	AF	positive
										F4696_Hyphodontia	A17_Methanobacterium	0.6446	0.0235	AF	positive
										F44_Setophoma	A17_Methanobacterium	-0.6725	0.0297	AF	negative
										F104_o_Pleosporales	A17_Methanobacterium	0.6481	0.019	AF	positive
										F15_o_Sordariales	A17_Methanobacterium	0.6481	0.0198	AF	positive
										A144_Methanobacterium	B313_uncultured bacterium	-0.8855	0.0198	AB	negative
										A12_Methanobacterium	B88_o_NA	-0.6737	0.0099	AB	negative
										A144_Methanobacterium	B88_o_NA	-0.8881	0.0198	AB	negative
										A51_Methanosaeta	B2658_f_Methylomonaceae	0.6797	0.0334	AB	positive
										A63_Methanosarcina	B95_o_RCP2-54	-0.7083	0.0198	AB	negative
										A144_Methanobacterium	B3758_uncultured Syntrophobacteraceae bacterium	0.6236	0.0334	AB	positive
										A36_Methanosarcina	B20_metagenome	0.6003	0.0396	AB	positive
										A21_Methanosarcina	B932_uncultured	0.605	0.0495	AB	positive
										A10_Methanosaeta	B932_uncultured	-0.8153	0.0198	AB	negative
										A21_Methanosarcina	B1704_Hymenobacter	0.7309	0.0198	AB	positive
										A21_Methanosarcina	B23_uncultured	-0.6882	0.0297	AB	negative
										A132_Methanosarcina	B766_Syntrophobacter	0.716	0.0137	AB	positive
										A19_Methanocella	B104_f_uncultured	-0.6725	0.0297	AB	negative
										A51_Methanosaeta	B295_uncultured prokaryote	0.6631	0.005	AB	positive
										A51_Methanosaeta	B260_Anaeromyxobacter	0.7399	0.0137	AB	positive
										A66_Methanosaeta	B1432_f_Burkholderiaceae	0.7276	0.0235	AB	positive
										A12_Methanobacterium	B3848_Lutispora	0.623	0.0495	AB	positive
										A12_Methanobacterium	B2697_uncultured bacterium	-0.7214	0.0099	AB	negative
										A58_Methanobacterium	B2697_uncultured bacterium	0.6402	0.0495	AB	positive
										A144_Methanobacterium	B435_Geobacter	0.7275	0.0137	AB	positive
										A281_Methanocella	B4397_uncultured Archangiaceae bacterium	0.639	0.0235	AB	positive
										A10_Methanosaeta	B86_Gemmatimonas	-0.7363	0.0198	AB	negative
										A265_Methanobacterium	B573_Anaeromyxobacter	0.7579	0.0137	AB	positive
										A21_Methanosarcina	B320_Gemmatimonas	0.8705	0.0198	AB	positive
										A10_Methanosaeta	B320_Gemmatimonas	-0.683	0.0198	AB	negative
										A265_Methanobacterium	B5739_o_Acidobacteriales	0.6858	0.0137	AB	positive
										A281_Methanocella	B2990_Anaeromyxobacter	0.6048	0.005	AB	positive
										A132_Methanosarcina	B1133_Anaeromyxobacter	0.7258	0.0137	AB	positive
										A8_Methanobacterium	B739_uncultured bacterium	0.7035	0.0297	AB	positive
										A144_Methanobacterium	B4496_f_Ruminococcaceae	0.6374	0.005	AB	positive
										A63_Methanosarcina	A92_Methanomassiliicoccus	0.6351	0.019	A	positive
										A51_Methanosaeta	B106_Oryzihumus	0.6008	0.0235	AB	positive
										A21_Methanosarcina	B326_f_Burkholderiaceae	0.6952	0.0198	AB	positive
										A51_Methanosaeta	B326_f_Burkholderiaceae	0.6021	0.0388	AB	positive
										A281_Methanocella	B2069_ADurb.Bin063-1	0.7293	0.0137	AB	positive
										A59_Methanocella	B906_f_SC-I-84	0.74	0.0197	AB	positive
										A51_Methanosaeta	B2121_Pajaroellobacter	0.6816	0.0137	AB	positive
										A144_Methanobacterium	B175_ADurb.Bin063-1	0.7917	0.0137	AB	positive
										A51_Methanosaeta	B199_Ellin6067	0.7884	0.0235	AB	positive
										A144_Methanobacterium	B1358_f_Solibacteraceae (Subgroup 3)	0.6664	0.0334	AB	positive
										A40_Methanosaeta	B1847_uncultured bacterium	0.6134	0.005	AB	positive
										A281_Methanocella	B51_f_uncultured	0.7467	0.0137	AB	positive
										A21_Methanosarcina	B539_o_Subgroup 13	0.8079	0.0099	AB	positive
										A10_Methanosaeta	B539_o_Subgroup 13	-0.6384	0.0198	AB	negative
										A47_Methanobacterium	B242_Nakamurella	0.7162	0.0198	AB	positive
										A12_Methanobacterium	B242_Nakamurella	-0.7125	0.0396	AB	negative
										A51_Methanosaeta	B3130_Anaerolinea	0.7382	0.005	AB	positive
										A12_Methanobacterium	B67_uncultured	-0.7291	0.0198	AB	negative
										A10_Methanosaeta	B67_uncultured	-0.7631	0.0297	AB	negative
										A63_Methanosarcina	B402_uncultured prokaryote	0.8246	0.0098	AB	positive
										A21_Methanosarcina	B790_uncultured Sphingobacteriales bacterium	0.7194	0.0198	AB	positive
										A21_Methanosarcina	F832_o_NA	0.6466	0.0297	AF	positive
										A281_Methanocella	F832_o_NA	0.6032	0.0289	AF	positive
										A63_Methanosarcina	B3495_f_Roseiflexaceae	0.7204	0.0197	AB	positive
										A265_Methanobacterium	F3355_f_Chaetomiaceae	0.6001	0.0137	AF	positive
										A265_Methanobacterium	B6569_Methylomonas	0.6699	0.0137	AB	positive
										A40_Methanosaeta	B953_o_NA	0.697	0.0137	AB	positive
										A265_Methanobacterium	A37_Methanoregula	0.7301	0.0235	A	positive
										A51_Methanosaeta	B178_Geobacter	0.716	0.0137	AB	positive
										A281_Methanocella	B493_o_uncultured	0.7078	0.0137	AB	positive
										B4562_Marmoricola	A265_Methanobacterium	0.7263	0.005	AB	positive
										F3373_o_NA	A265_Methanobacterium	0.6105	0.0433	AF	positive
										A116_o_NA	A265_Methanobacterium	0.7364	0.005	A	positive
										F4268_unidentified	A265_Methanobacterium	0.6364	0.0137	AF	positive
										F3480_unidentified	A265_Methanobacterium	0.6269	0.0137	AF	positive
										B3188_uncultured proteobacterium	A265_Methanobacterium	0.6931	0.0137	AB	positive
										B2476_uncultured candidate division OS-K bacterium	A265_Methanobacterium	0.6701	0.0137	AB	positive
										B415_Anaerolinea	A265_Methanobacterium	0.7003	0.005	AB	positive
										B4678_Bauldia	A265_Methanobacterium	0.6182	0.0137	AB	positive
										B6331_Nitrospira	A265_Methanobacterium	0.6776	0.0235	AB	positive
										B5766_Aquicella	A265_Methanobacterium	0.6154	0.005	AB	positive
										B3698_wastewater metagenome	A265_Methanobacterium	0.6594	0.0137	AB	positive
										B3053_uncultured Caldilineaceae bacterium	A265_Methanobacterium	0.6411	0.005	AB	positive
										F970_o_NA	A265_Methanobacterium	0.6192	0.0334	AF	positive
										B2164_AKIW659	A265_Methanobacterium	0.694	0.0235	AB	positive
										B1928_Haliangium	A265_Methanobacterium	0.6701	0.0235	AB	positive
										B5519_Leptolinea	A265_Methanobacterium	0.6628	0.0137	AB	positive
										B793_Flavobacterium	A265_Methanobacterium	0.6511	0.0137	AB	positive
										B2077_uncultured Coriobacteriales bacterium	A265_Methanobacterium	0.6656	0.005	AB	positive
										B337_Bryobacter	A265_Methanobacterium	0.6775	0.005	AB	positive
										B753_Mycobacterium	A265_Methanobacterium	0.6918	0.0137	AB	positive
										B123_Ellin6067	A265_Methanobacterium	0.7546	0.0235	AB	positive
										B4161_Geobacter	A265_Methanobacterium	0.6821	0.005	AB	positive
										B290_f_SC-I-84	A265_Methanobacterium	0.6448	0.005	AB	positive
										B135_Nakamurella	A265_Methanobacterium	0.6266	0.019	AB	positive
										B596_Massilia	A265_Methanobacterium	0.7047	0.0334	AB	positive
										B360_Phenylobacterium	A265_Methanobacterium	0.6159	0.0433	AB	positive
										B6069_uncultured soil bacterium	A265_Methanobacterium	0.6038	0.005	AB	positive
										B325_Phenylobacterium	A265_Methanobacterium	0.6375	0.0235	AB	positive
										B2662_Reyranella	A265_Methanobacterium	0.6483	0.005	AB	positive
										B2431_metagenome	A265_Methanobacterium	0.6436	0.005	AB	positive
										B3501_f_Ruminococcaceae	A265_Methanobacterium	0.6768	0.0137	AB	positive
										B653_uncultured Conexibacteraceae bacterium	A265_Methanobacterium	0.651	0.0235	AB	positive
										B4034_uncultured Chlorobi bacterium	A265_Methanobacterium	0.6796	0.0235	AB	positive
										B2681_Haliangium	A265_Methanobacterium	0.6323	0.005	AB	positive
										B319_Pseudomonas	A265_Methanobacterium	0.6277	0.005	AB	positive
										B1307_uncultured prokaryote	A265_Methanobacterium	0.6733	0.0235	AB	positive
										B7199_f_uncultured	A265_Methanobacterium	0.6909	0.005	AB	positive
										B372_Clostridium sensu stricto 1	A265_Methanobacterium	0.6586	0.005	AB	positive
										B9129_Chthonomonas	A265_Methanobacterium	0.6276	0.0235	AB	positive
										B3405_Clostridium sensu stricto 12	A265_Methanobacterium	0.639	0.005	AB	positive
										B869_uncultured Prosthecobacter sp.	A265_Methanobacterium	0.7092	0.0137	AB	positive
										B2169_f_0319-6G20	A265_Methanobacterium	0.6496	0.0137	AB	positive
										B1004_ADurb.Bin063-1	A265_Methanobacterium	0.7266	0.005	AB	positive
										F43_Psilocybe	A265_Methanobacterium	0.7513	0.005	AF	positive
										F164_Cyphellophora	A265_Methanobacterium	0.6635	0.005	AF	positive
										F286_Typhula	A265_Methanobacterium	0.7494	0.0137	AF	positive
										A21_Methanosarcina	B487_f_Holophagaceae	-0.7659	0.0297	AB	negative
										A66_Methanosaeta	B602_Pseudolabrys	0.6546	0.005	AB	positive
										A51_Methanosaeta	B437_Haliangium	0.7555	0.005	AB	positive
										A132_Methanosarcina	B176_Phenylobacterium	0.7305	0.005	AB	positive
										A66_Methanosaeta	B1326_ADurb.Bin063-1	0.6737	0.005	AB	positive
										A144_Methanobacterium	A98_uncultured archaeon	0.7396	0.0137	A	positive
										A36_Methanosarcina	B103_Porphyrobacter	-0.7076	0.0198	AB	negative
										A40_Methanosaeta	B2405_uncultured Acidobacteria bacterium	0.6486	0.0235	AB	positive
										A144_Methanobacterium	B2415_uncultured soil bacterium PBS-III-20	0.6219	0.0433	AB	positive
										A281_Methanocella	B747_Candidatus Solibacter	0.749	0.0137	AB	positive
										A21_Methanosarcina	B2286_uncultured Bacteroidetes bacterium	0.6248	0.0297	AB	positive
										A40_Methanosaeta	B926_Desulfomonile	0.6578	0.0137	AB	positive
										A47_Methanobacterium	B112_Massilia	0.7394	0.0099	AB	positive
										A8_Methanobacterium	B1974_Nakamurella	0.6975	0.0198	AB	positive
										A132_Methanosarcina	B303_Mycobacterium	0.65	0.0137	AB	positive
										A132_Methanosarcina	B153_uncultured bacterium	-0.6377	0.0297	AB	negative
										A21_Methanosarcina	B822_uncultured Termite group 1 bacterium	-0.8356	0.0198	AB	negative
										A10_Methanosaeta	B822_uncultured Termite group 1 bacterium	0.6991	0.0198	AB	positive
										A132_Methanosarcina	A26_uncultured Methanomicrobiales archaeon	0.62	0.0137	A	positive
										A40_Methanosaeta	B802_ADurb.Bin063-1	0.7397	0.0137	AB	positive
										A281_Methanocella	B116_Reyranella	-0.8844	0.0198	AB	negative
										A66_Methanosaeta	A76_Rice Cluster I	0.6067	0.0235	A	positive
										A144_Methanobacterium	B45_f_Blastocatellaceae	0.7251	0.005	AB	positive
										A12_Methanobacterium	B1020_uncultured forest soil bacterium	-0.8292	0.0099	AB	negative
										A59_Methanocella	B1378_Rhodobacter	-0.6274	0.0396	AB	negative
										A66_Methanosaeta	B1081_Candidatus Solibacter	0.7173	0.0235	AB	positive
										A21_Methanosarcina	B213_f_SC-I-84	0.6184	0.0099	AB	positive
										A40_Methanosaeta	B5741_uncultured bacterium	0.6898	0.005	AB	positive
										A51_Methanosaeta	B4342_uncultured bacterium	0.6283	0.0137	AB	positive
										A51_Methanosaeta	B223_uncultured proteobacterium	-0.8824	0.0198	AB	negative
										A63_Methanosarcina	F3186_o_NA	0.7811	0.0296	AF	positive
										A132_Methanosarcina	B7925_o_NA	0.6152	0.0137	AB	positive
										A144_Methanobacterium	F2249_o_NA	0.7371	0.005	AF	positive
										A10_Methanosaeta	F877_o_Sordariales	0.7118	0.0297	AF	positive
										A12_Methanobacterium	F626_unidentified	0.6519	0.0396	AF	positive
										A19_Methanocella	F626_unidentified	0.7157	0.0396	AF	positive
										A10_Methanosaeta	F626_unidentified	0.6959	0.0297	AF	positive
										A63_Methanosarcina	F626_unidentified	0.7342	0.0198	AF	positive
										A12_Methanobacterium	F18_Schizothecium	-0.7471	0.0495	AF	negative
										A19_Methanocella	F18_Schizothecium	-0.7867	0.0396	AF	negative
										A10_Methanosaeta	F18_Schizothecium	-0.7007	0.0198	AF	negative
										A40_Methanosaeta	B10891_f_Parachlamydiaceae	0.6032	0.0235	AB	positive
										A40_Methanosaeta	B10472_uncultured verrucomicrobium DEV008	0.6654	0.0137	AB	positive
										A63_Methanosarcina	F4088_o_NA	0.7968	0.0098	AF	positive
										A144_Methanobacterium	F3188_o_NA	0.6398	0.0137	AF	positive
										A21_Methanosarcina	F322_o_NA	0.6944	0.0297	AF	positive
										A10_Methanosaeta	F322_o_NA	-0.6682	0.0396	AF	negative
										A144_Methanobacterium	B6853_uncultured Verrucomicrobia bacterium	0.6227	0.0235	AB	positive
										A132_Methanosarcina	F5117_unidentified	0.6126	0.0433	AF	positive
										A40_Methanosaeta	B3641_Pelolinea	0.6121	0.0235	AB	positive
										A36_Methanosarcina	F136_Spirosphaera	-0.9011	0.0099	AF	negative
										A4_Methanosaeta	F136_Spirosphaera	0.6877	0.0297	AF	positive
										A132_Methanosarcina	B3574_uncultured bacterium	0.613	0.005	AB	positive
										A66_Methanosaeta	F1856_Tetracladium	0.7009	0.005	AF	positive
										A40_Methanosaeta	F402_o_NA	-0.8517	0.0198	AF	negative
										A63_Methanosarcina	B3337_o_Saccharimonadales	0.6015	0.0495	AB	positive
										A40_Methanosaeta	F216_o_NA	0.6342	0.0137	AF	positive
										A66_Methanosaeta	B2620_f_0319-6G20	0.682	0.0137	AB	positive
										A21_Methanosarcina	B4306_f_uncultured	0.653	0.0297	AB	positive
										A51_Methanosaeta	B2001_o_NA	0.737	0.0137	AB	positive
										A21_Methanosarcina	B3628_uncultured bacterium	0.7387	0.0099	AB	positive
										A10_Methanosaeta	B3628_uncultured bacterium	-0.6065	0.0396	AB	negative
										A63_Methanosarcina	F202_Mortierella	0.629	0.0198	AF	positive
										A12_Methanobacterium	B1119_uncultured bacterium	0.6349	0.0198	AB	positive
										A281_Methanocella	F1857_o_NA	0.6156	0.0137	AF	positive
										A66_Methanosaeta	A326_o_NA	0.7349	0.005	A	positive
										A21_Methanosarcina	B1215_uncultured	0.6387	0.0198	AB	positive
										A19_Methanocella	B3095_uncultured	-0.7644	0.0198	AB	negative
										A281_Methanocella	F3114_o_NA	0.669	0.005	AF	positive
										A8_Methanobacterium	F1613_unidentified	0.6085	0.0396	AF	positive
										A281_Methanocella	F126_o_Helotiales	0.6432	0.0297	AF	positive
										A63_Methanosarcina	F3692_unidentified	0.763	0.0197	AF	positive
										A281_Methanocella	F187_unidentified	0.652	0.005	AF	positive
										A51_Methanosaeta	B2855_uncultured soil bacterium PBS-III-20	0.6022	0.0137	AB	positive
										A59_Methanocella	F319_unidentified	0.705	0.0297	AF	positive
										A132_Methanosarcina	B1535_planctomycete WWH14	0.6014	0.0235	AB	positive
										A59_Methanocella	F3274_o_NA	0.6938	0.0296	AF	positive
										A132_Methanosarcina	F2326_unidentified	0.6723	0.0235	AF	positive
										B1153_Novosphingobium	A47_Methanobacterium	0.8087	0.0098	AB	positive
										A49_o_NA	A47_Methanobacterium	0.6762	0.0297	A	positive
										B728_Sandaracinus	A47_Methanobacterium	-0.7238	0.0099	AB	negative
										B1168_Desulfatiglans	A47_Methanobacterium	0.6042	0.0297	AB	positive
										B900_uncultured soil bacterium	A47_Methanobacterium	0.6653	0.0197	AB	positive
										B54_Oryzihumus	A47_Methanobacterium	-0.6187	0.0198	AB	negative
										B333_Arenimonas	A47_Methanobacterium	0.6206	0.0297	AB	positive
										B115_f_Micrococcaceae	A47_Methanobacterium	0.692	0.0098	AB	positive
										B528_RBG-16-58-14	A47_Methanobacterium	0.6689	0.0099	AB	positive
										B265_uncultured eubacterium WCHB1-50	A47_Methanobacterium	-0.9116	0.0099	AB	negative
										F109_Myrmecridium	A47_Methanobacterium	0.6348	0.0297	AF	positive
										A10_Methanosaeta	B377_Syntrophorhabdus	0.7454	0.0198	AB	positive
										A144_Methanobacterium	B3849_Conexibacter	0.7302	0.005	AB	positive
										A144_Methanobacterium	F728_unidentified	0.7029	0.0137	AF	positive
										A12_Methanobacterium	F721_o_NA	0.677	0.0297	AF	positive
										A19_Methanocella	F721_o_NA	0.6847	0.0495	AF	positive
										A63_Methanosarcina	F721_o_NA	0.7098	0.0099	AF	positive
										A132_Methanosarcina	F1180_o_NA	0.664	0.005	AF	positive
										A132_Methanosarcina	B2878_uncultured bacterium	0.6041	0.0137	AB	positive
										A40_Methanosaeta	B8058_uncultured Verrucomicrobia bacterium	0.6317	0.005	AB	positive
										A51_Methanosaeta	B1603_f_Anaerolineaceae	0.6698	0.0137	AB	positive
										A144_Methanobacterium	B11096_uncultured	0.6095	0.0137	AB	positive
										A51_Methanosaeta	F1826_o_NA	0.6862	0.0433	AF	positive
										A51_Methanosaeta	B5085_Syntrophobacter	0.7171	0.0137	AB	positive
										A132_Methanosarcina	B366_uncultured	0.6615	0.0235	AB	positive
										A19_Methanocella	F230_unidentified	0.7225	0.0099	AF	positive
										A40_Methanosaeta	B5305_uncultured	0.6087	0.005	AB	positive
										A12_Methanobacterium	F82_Schizothecium	0.6016	0.0495	AF	positive
										A66_Methanosaeta	B3703_Bryobacter	0.6472	0.0235	AB	positive
										A19_Methanocella	F812_unidentified	-0.6861	0.0198	AF	negative
										A36_Methanosarcina	F554_o_NA	0.7588	0.0099	AF	positive
										A21_Methanosarcina	F554_o_NA	-0.6846	0.0396	AF	negative
										A281_Methanocella	B1414_Phaselicystis	0.612	0.0235	AB	positive
										A66_Methanosaeta	B559_o_NA	0.7213	0.0235	AB	positive
										A12_Methanobacterium	B2937_Methylobacter	0.6495	0.0198	AB	positive
										A281_Methanocella	B3371_f_Ruminococcaceae	0.6146	0.0137	AB	positive
										A12_Methanobacterium	B989_uncultured soil bacterium	-0.625	0.0198	AB	negative
										A59_Methanocella	B125_uncultured	-0.9132	0.0099	AB	negative
										A281_Methanocella	B53_Geobacter	-0.8847	0.0495	AB	negative
										A40_Methanosaeta	B305_uncultured prokaryote	0.7744	0.0235	AB	positive
										A40_Methanosaeta	B210_Candidatus Solibacter	0.749	0.0137	AB	positive
										A51_Methanosaeta	B1690_Candidatus Koribacter	0.7219	0.005	AB	positive
										A144_Methanobacterium	B8582_GOUTA6	0.6475	0.0137	AB	positive
										A10_Methanosaeta	B1201_o_RBG-13-54-9	-0.6989	0.0297	AB	negative
										A21_Methanosarcina	B294_uncultured	0.6081	0.0396	AB	positive
										A8_Methanobacterium	B294_uncultured	0.6446	0.0396	AB	positive
										A36_Methanosarcina	B14_uncultured Nitrospirae bacterium	0.6659	0.0396	AB	positive
										A144_Methanobacterium	B847_Ferruginibacter	0.739	0.005	AB	positive
										A40_Methanosaeta	B3742_Desulfosporosinus	0.6054	0.0235	AB	positive
										A21_Methanosarcina	B522_Geothrix	0.6344	0.0495	AB	positive
										A66_Methanosaeta	B5396_f_Archangiaceae	0.7029	0.005	AB	positive
										A132_Methanosarcina	B807_o_NA	0.7534	0.005	AB	positive
										A40_Methanosaeta	B5951_o_Myxococcales	0.6003	0.0235	AB	positive
										A281_Methanocella	B6168_o_RBG-13-54-9	0.6226	0.005	AB	positive
										A51_Methanosaeta	B1149_f_Syntrophobacteraceae	0.6892	0.0235	AB	positive
										A36_Methanosarcina	F1008_o_NA	-0.636	0.0396	AF	negative
										A66_Methanosaeta	F1008_o_NA	-0.8007	0.0198	AF	negative
										A4_Methanosaeta	F1008_o_NA	0.6748	0.0297	AF	positive
										A40_Methanosaeta	B1335_uncultured bacterium	0.6613	0.0433	AB	positive
										A51_Methanosaeta	B2481_Aquicella	0.6509	0.005	AB	positive
										A21_Methanosarcina	B292_f_BSV26	-0.7313	0.0198	AB	negative
										A63_Methanosarcina	B2281_uncultured Gemmatimonadetes bacterium	0.6118	0.0197	AB	positive
										A144_Methanobacterium	F13_Schizothecium	-0.8281	0.0297	AF	negative
										A10_Methanosaeta	F68_o_NA	-0.8485	0.0099	AF	negative
										A63_Methanosarcina	F2841_unidentified	0.6066	0.019	AF	positive
										A21_Methanosarcina	B656_o_NA	0.6727	0.0297	AB	positive
										A40_Methanosaeta	B163_uncultured Bellilinea sp.	-0.6785	0.0099	AB	negative
										A66_Methanosaeta	F1045_unidentified	0.6824	0.005	AF	positive
										A21_Methanosarcina	F1537_o_NA	0.6517	0.0099	AF	positive
										A40_Methanosaeta	F2333_o_NA	0.6059	0.0235	AF	positive
										A66_Methanosaeta	B130_uncultured	-0.6089	0.0495	AB	negative
										A40_Methanosaeta	B1708_uncultured	0.6132	0.0137	AB	positive
										A144_Methanobacterium	B1601_uncultured proteobacterium	0.617	0.0334	AB	positive
										A36_Methanosarcina	B120_uncultured Burkholderiaceae bacterium	-0.6341	0.0297	AB	negative
										A21_Methanosarcina	B98_uncultured	0.765	0.0099	AB	positive
										A10_Methanosaeta	B98_uncultured	-0.6648	0.0198	AB	negative
										A281_Methanocella	B240_uncultured Chloroflexi bacterium	0.7513	0.0137	AB	positive
										A281_Methanocella	B1092_uncultured	0.6854	0.0137	AB	positive
										A21_Methanosarcina	B1200_Hyphomicrobium	0.6732	0.0495	AB	positive
										A66_Methanosaeta	B3195_Geobacter	0.6697	0.0235	AB	positive
										A132_Methanosarcina	B1976_uncultured Nitrosomonadaceae bacterium	0.7402	0.005	AB	positive
										A51_Methanosaeta	B519_uncultured	0.6659	0.005	AB	positive
										A21_Methanosarcina	B1322_uncultured	0.8524	0.0297	AB	positive
										A10_Methanosaeta	B1322_uncultured	-0.645	0.0396	AB	negative
										A144_Methanobacterium	B4241_Candidatus Solibacter	0.7056	0.0334	AB	positive
										A4_Methanosaeta	B706_uncultured proteobacterium	0.7118	0.0297	AB	positive
										B209_uncultured Desulfuromonadales bacterium	A12_Methanobacterium	0.6716	0.0099	AB	positive
										B1_uncultured prokaryote	A12_Methanobacterium	0.7417	0.0396	AB	positive
										A4_Methanosaeta	A12_Methanobacterium	0.7085	0.0495	A	positive
										B782_uncultured Thermaerobacter sp.	A12_Methanobacterium	0.6547	0.0099	AB	positive
										B405_uncultured	A12_Methanobacterium	-0.8049	0.0297	AB	negative
										B447_wastewater metagenome	A12_Methanobacterium	0.7245	0.0099	AB	positive
										B36_o_Sva0485	A12_Methanobacterium	0.7117	0.0297	AB	positive
										B2066_Aquicella	A12_Methanobacterium	0.625	0.0099	AB	positive
										B973_Acidibacter	A12_Methanobacterium	-0.6185	0.0297	AB	negative
										B551_Gaiella	A12_Methanobacterium	-0.793	0.0099	AB	negative
										B54_Oryzihumus	A12_Methanobacterium	0.6818	0.0495	AB	positive
										B976_metagenome	A12_Methanobacterium	0.6792	0.0099	AB	positive
										B4010_Cellvibrio	A12_Methanobacterium	-0.6369	0.0495	AB	negative
										B203_uncultured Sorangiineae bacterium	A12_Methanobacterium	-0.6607	0.0396	AB	negative
										A7_f_uncultured	A12_Methanobacterium	0.8194	0.0198	A	positive
										B217_uncultured	A12_Methanobacterium	0.6945	0.0099	AB	positive
										B528_RBG-16-58-14	A12_Methanobacterium	-0.727	0.0495	AB	negative
										B949_o_NA	A12_Methanobacterium	-0.6381	0.0198	AB	negative
										B458_uncultured Aminicenantes bacterium	A12_Methanobacterium	0.623	0.0495	AB	positive
										A39_Candidatus Nitrocosmicus	A12_Methanobacterium	0.6849	0.0396	A	positive
										B250_o_NA	A12_Methanobacterium	0.6068	0.0297	AB	positive
										B1534_uncultured Chlorobiales bacterium	A12_Methanobacterium	0.6564	0.0198	AB	positive
										F30_f_Didymellaceae	A12_Methanobacterium	-0.8265	0.0198	AF	negative
										F36_Fusicolla	A12_Methanobacterium	0.7444	0.0198	AF	positive
										F46_Arnium	A12_Methanobacterium	-0.6866	0.0297	AF	negative
										F38_Phaeosphaeria	A12_Methanobacterium	-0.8567	0.0198	AF	negative
										F48_unidentified	A12_Methanobacterium	-0.8009	0.0099	AF	negative
										F44_Setophoma	A12_Methanobacterium	-0.7039	0.0396	AF	negative
										F490_o_Hypocreales	A12_Methanobacterium	-0.8327	0.0198	AF	negative
										F277_o_Sordariales	A12_Methanobacterium	0.679	0.0297	AF	positive
										F23_f_Nectriaceae	A12_Methanobacterium	0.7026	0.0396	AF	positive
										F440_Bullera	A12_Methanobacterium	-0.7163	0.0297	AF	negative
										F73_Cyberlindnera	A12_Methanobacterium	0.7302	0.0396	AF	positive
										A51_Methanosaeta	B87_f_Kineosporiaceae	0.6326	0.0334	AB	positive
										A4_Methanosaeta	B1080_Sphingomonas	0.6511	0.0495	AB	positive
										A144_Methanobacterium	B322_o_SJA-15	0.7147	0.0433	AB	positive
										A59_Methanocella	B149_uncultured Ferrimicrobium sp.	0.6314	0.0099	AB	positive
										A19_Methanocella	B752_metagenome	-0.619	0.0297	AB	negative
										A51_Methanosaeta	B4196_uncultured Rhizobiales bacterium	0.6126	0.0137	AB	positive
										A132_Methanosarcina	B1024_Mucilaginibacter	0.7228	0.0235	AB	positive
										A281_Methanocella	B61_Ellin6067	0.7581	0.0235	AB	positive
										A59_Methanocella	B1279_ADurb.Bin063-1	0.6057	0.019	AB	positive
										A281_Methanocella	B562_uncultured forest soil bacterium	0.6854	0.005	AB	positive
										A144_Methanobacterium	B46_Bryobacter	-0.6236	0.0495	AB	negative
										A281_Methanocella	B479_o_NA	0.6756	0.0137	AB	positive
										A19_Methanocella	B404_o_Subgroup 2	-0.6903	0.0198	AB	negative
										A63_Methanosarcina	B404_o_Subgroup 2	-0.6328	0.0396	AB	negative
										A281_Methanocella	B3578_Pajaroellobacter	0.7366	0.0137	AB	positive
										A51_Methanosaeta	B598_Clostridium sensu stricto 13	0.7419	0.005	AB	positive
										A132_Methanosarcina	B1159_Candidatus Solibacter	0.7837	0.005	AB	positive
										A40_Methanosaeta	A146_uncultured euryarchaeote	0.7174	0.0235	A	positive
										A132_Methanosarcina	B1578_uncultured Desulfovirga sp.	0.6726	0.0137	AB	positive
										A40_Methanosaeta	B85_o_Subgroup 7	0.6961	0.0137	AB	positive
										A144_Methanobacterium	B9496_uncultured Desulfovirga sp.	0.6137	0.0137	AB	positive
										A40_Methanosaeta	B6358_Mycobacterium	0.698	0.005	AB	positive
										A281_Methanocella	B5765_Mycobacterium	0.6804	0.005	AB	positive
										A51_Methanosaeta	B1240_f_uncultured	0.7096	0.005	AB	positive
										A40_Methanosaeta	B794_f_Chitinophagaceae	0.678	0.0137	AB	positive
										A21_Methanosarcina	B4_uncultured	0.6838	0.0198	AB	positive
										A10_Methanosaeta	B4_uncultured	-0.7603	0.0198	AB	negative
										A63_Methanosarcina	B4_uncultured	-0.6295	0.0396	AB	negative
										A281_Methanocella	B908_f_Archangiaceae	0.6882	0.0137	AB	positive
										A51_Methanosaeta	B1296_uncultured Syntrophobacteraceae bacterium	0.6384	0.005	AB	positive
										A63_Methanosarcina	B834_o_NA	0.7594	0.0098	AB	positive
										A4_Methanosaeta	A36_Methanosarcina	-0.6605	0.0396	A	negative
										F802_o_NA	A36_Methanosarcina	0.7433	0.0198	AF	positive
										F108_o_NA	A36_Methanosarcina	-0.6308	0.0198	AF	negative
										B391_uncultured Sorangiineae bacterium	A36_Methanosarcina	0.6978	0.0297	AB	positive
										B239_f_uncultured	A36_Methanosarcina	-0.6379	0.0396	AB	negative
										B57_Conexibacter	A36_Methanosarcina	0.8234	0.0098	AB	positive
										B211_f_SC-I-84	A36_Methanosarcina	0.6918	0.0297	AB	positive
										B1999_uncultured Planctomyces sp.	A36_Methanosarcina	0.8072	0.0098	AB	positive
										B8_Luteimonas	A36_Methanosarcina	-0.6892	0.0198	AB	negative
										B304_f_UASB-TL25	A36_Methanosarcina	0.6038	0.0396	AB	positive
										F28_o_Helotiales	A36_Methanosarcina	-0.6228	0.0396	AF	negative
										F58_unidentified	A36_Methanosarcina	-0.8566	0.0099	AF	negative
										F299_Rhodotorula	A36_Methanosarcina	0.7087	0.0198	AF	positive
										F27_Neonectria	A36_Methanosarcina	-0.6896	0.0495	AF	negative
										F14_Pyrenochaetopsis	A36_Methanosarcina	0.7453	0.0198	AF	positive
										F181_Occultifur	A36_Methanosarcina	-0.673	0.0495	AF	negative
										B1_uncultured prokaryote	A21_Methanosarcina	-0.6479	0.0297	AB	negative
										B378_Massilia	A21_Methanosarcina	0.6323	0.0198	AB	positive
										F985_o_NA	A21_Methanosarcina	-0.6623	0.0099	AF	negative
										B3148_f_Steroidobacteraceae	A21_Methanosarcina	0.6417	0.0297	AB	positive
										B302_Phycicoccus	A21_Methanosarcina	0.7489	0.0099	AB	positive
										B286_uncultured	A21_Methanosarcina	0.6829	0.0198	AB	positive
										B28_Desulfobacca	A21_Methanosarcina	-0.65	0.0297	AB	negative
										A14_Candidatus Nitrosotalea	A21_Methanosarcina	0.7312	0.0297	A	positive
										B800_Sideroxydans	A21_Methanosarcina	0.7068	0.0297	AB	positive
										B470_f_uncultured	A21_Methanosarcina	0.6658	0.0396	AB	positive
										B59_f_Intrasporangiaceae	A21_Methanosarcina	0.728	0.0198	AB	positive
										A10_Methanosaeta	A21_Methanosarcina	-0.7213	0.0396	A	negative
										B280_Hyphomicrobium	A21_Methanosarcina	-0.7083	0.0198	AB	negative
										B677_Gemmatimonas	A21_Methanosarcina	0.6325	0.0396	AB	positive
										B353_uncultured bacterium	A21_Methanosarcina	-0.7175	0.0396	AB	negative
										B315_uncultured	A21_Methanosarcina	-0.6992	0.0099	AB	negative
										B3380_uncultured	A21_Methanosarcina	0.7028	0.0198	AB	positive
										B3_uncultured prokaryote	A21_Methanosarcina	-0.8206	0.0099	AB	negative
										B365_o_uncultured	A21_Methanosarcina	-0.7241	0.0099	AB	negative
										B122_Blastococcus	A21_Methanosarcina	0.6064	0.0495	AB	positive
										B529_Fodinicola	A21_Methanosarcina	-0.745	0.0099	AB	negative
										F62_Nigrospora	A21_Methanosarcina	0.6254	0.0495	AF	positive
										F70_Mortierella	A21_Methanosarcina	0.8673	0.0099	AF	positive
										F617_Hannaella	A21_Methanosarcina	0.6169	0.0396	AF	positive
										F294_Pyricularia	A21_Methanosarcina	0.7979	0.0099	AF	positive
										F151_o_Helotiales	A21_Methanosarcina	0.8391	0.0198	AF	positive
										F199_unidentified	A21_Methanosarcina	0.7835	0.0099	AF	positive
										F2911_Kurtzmanomyces	A21_Methanosarcina	0.6893	0.0099	AF	positive
										F29_Tetracladium	A21_Methanosarcina	0.665	0.0396	AF	positive
										F147_Papiliotrema	A21_Methanosarcina	0.713	0.0396	AF	positive
										F562_Cryptococcus	A21_Methanosarcina	0.6161	0.0198	AF	positive
										F583_Cryptococcus	A21_Methanosarcina	0.6831	0.0099	AF	positive
										F377_Neobulgaria	A21_Methanosarcina	0.8713	0.0099	AF	positive
										F109_Myrmecridium	A21_Methanosarcina	0.6999	0.0396	AF	positive
										F381_Fusarium	A21_Methanosarcina	0.7218	0.0297	AF	positive
										F299_Rhodotorula	A21_Methanosarcina	-0.6892	0.0198	AF	negative
										F12_Pseudeurotium	A21_Methanosarcina	-0.7868	0.0099	AF	negative
										B194_uncultured	A66_Methanosaeta	0.6524	0.0235	AB	positive
										F258_o_NA	A66_Methanosaeta	0.6496	0.005	AF	positive
										B505_f_Micromonosporaceae	A66_Methanosaeta	0.6567	0.005	AB	positive
										B1005_Haliangium	A66_Methanosaeta	0.6169	0.005	AB	positive
										B3401_Bryobacter	A66_Methanosaeta	0.6653	0.0137	AB	positive
										B119_uncultured organism	A66_Methanosaeta	0.6659	0.005	AB	positive
										B4050_o_Betaproteobacteriales	A66_Methanosaeta	0.6369	0.005	AB	positive
										B1450_Ferruginibacter	A66_Methanosaeta	0.7304	0.005	AB	positive
										B4500_Altererythrobacter	A66_Methanosaeta	0.6139	0.0334	AB	positive
										B1282_uncultured	A66_Methanosaeta	0.7071	0.0137	AB	positive
										B490_f_Acidobacteriaceae (Subgroup 1)	A66_Methanosaeta	0.604	0.0334	AB	positive
										B2323_uncultured bacterium	A66_Methanosaeta	0.614	0.005	AB	positive
										B321_o_NA	A66_Methanosaeta	0.6991	0.005	AB	positive
										B2503_f_Ruminococcaceae	A66_Methanosaeta	0.6192	0.0137	AB	positive
										B691_o_Microtrichales	A66_Methanosaeta	0.6335	0.005	AB	positive
										B4463_Aquicella	A66_Methanosaeta	0.6504	0.005	AB	positive
										B5772_o_Sva0485	A66_Methanosaeta	0.6965	0.0137	AB	positive
										B1698_Syntrophobacter	A66_Methanosaeta	0.7076	0.005	AB	positive
										B1546_Geobacter	A66_Methanosaeta	0.6535	0.0235	AB	positive
										B3139_o_NA	A66_Methanosaeta	0.7357	0.0137	AB	positive
										B1804_Desulfobacca	A66_Methanosaeta	0.6811	0.0137	AB	positive
										B358_uncultured	A66_Methanosaeta	0.6998	0.005	AB	positive
										B1501_Allorhizobium-Neorhizobium-Pararhizobium-Rhizobium	A66_Methanosaeta	0.6312	0.0137	AB	positive
										B99_ADurb.Bin063-1	A66_Methanosaeta	0.6827	0.0235	AB	positive
										B8875_f_Steroidobacteraceae	A66_Methanosaeta	0.6005	0.005	AB	positive
										F408_Leucosporidium	A66_Methanosaeta	0.6343	0.0137	AF	positive
										F221_Cistella	A66_Methanosaeta	0.772	0.0388	AF	positive
										F505_Sarocladium	A66_Methanosaeta	0.6777	0.005	AF	positive
										F14_Pyrenochaetopsis	A66_Methanosaeta	0.7326	0.0297	AF	positive
										B5623_Mucilaginibacter	A144_Methanobacterium	0.6455	0.0235	AB	positive
										B7251_metagenome	A144_Methanobacterium	0.6476	0.0137	AB	positive
										B9427_f_WD2101 soil group	A144_Methanobacterium	0.6026	0.0137	AB	positive
										F2061_unidentified	A144_Methanobacterium	0.6329	0.005	AF	positive
										B904_uncultured	A144_Methanobacterium	0.6699	0.0137	AB	positive
										B3924_o_SBR1031	A144_Methanobacterium	0.6928	0.005	AB	positive
										B264_Thiobacillus	A144_Methanobacterium	0.7166	0.0334	AB	positive
										B3391_Subgroup 10	A144_Methanobacterium	0.6561	0.0235	AB	positive
										B1680_Ferribacterium	A144_Methanobacterium	0.6531	0.005	AB	positive
										B4083_Bryobacter	A144_Methanobacterium	0.7194	0.005	AB	positive
										B79_f_SC-I-84	A144_Methanobacterium	-0.8259	0.0099	AB	negative
										B987_Leptolinea	A144_Methanobacterium	0.6964	0.0235	AB	positive
										B6278_Pseudomonas	A144_Methanobacterium	0.64	0.0137	AB	positive
										B1585_uncultured	A144_Methanobacterium	0.6583	0.005	AB	positive
										B2839_Gaiella	A144_Methanobacterium	0.7027	0.0137	AB	positive
										B499_f_Solibacteraceae (Subgroup 3)	A144_Methanobacterium	0.751	0.0334	AB	positive
										B267_uncultured Prosthecobacter sp.	A144_Methanobacterium	0.6931	0.0235	AB	positive
										B141_f_uncultured	A144_Methanobacterium	0.766	0.0137	AB	positive
										B4880_f_Isosphaeraceae	A144_Methanobacterium	0.6909	0.005	AB	positive
										B4576_f_Acidobacteriaceae (Subgroup 1)	A144_Methanobacterium	0.7089	0.005	AB	positive
										B1310_uncultured	A144_Methanobacterium	0.6547	0.005	AB	positive
										B1353_o_Myxococcales	A144_Methanobacterium	0.6684	0.0137	AB	positive
										B348_f_Burkholderiaceae	A144_Methanobacterium	0.7011	0.005	AB	positive
										A189_uncultured euryarchaeote	A144_Methanobacterium	0.6207	0.0388	A	positive
										B1191_Terrimonas	A144_Methanobacterium	0.6506	0.005	AB	positive
										B1986_Haliangium	A144_Methanobacterium	0.6769	0.005	AB	positive
										A73_uncultured	A144_Methanobacterium	0.8013	0.0137	A	positive
										B2317_Gaiella	A144_Methanobacterium	0.6957	0.0137	AB	positive
										B2750_Legionella	A144_Methanobacterium	0.6324	0.0235	AB	positive
										B8163_Hydrogenispora	A144_Methanobacterium	0.6975	0.005	AB	positive
										B2513_Flavobacterium	A144_Methanobacterium	0.7368	0.005	AB	positive
										B6021_Rhodoblastus	A144_Methanobacterium	0.7082	0.0137	AB	positive
										B359_o_NA	A144_Methanobacterium	0.7563	0.0137	AB	positive
										B1274_Roseomonas	A144_Methanobacterium	0.6654	0.005	AB	positive
										B7860_uncultured	A144_Methanobacterium	0.6388	0.0334	AB	positive
										B3968_uncultured actinobacterium	A144_Methanobacterium	0.6279	0.0137	AB	positive
										B1980_Cellulomonas	A144_Methanobacterium	0.6854	0.005	AB	positive
										A259_uncultured bacterium	A144_Methanobacterium	0.6271	0.019	A	positive
										B4281_uncultured	A144_Methanobacterium	0.681	0.0137	AB	positive
										B2201_Sphingomonas	A144_Methanobacterium	0.6152	0.005	AB	positive
										B715_Nocardioides	A144_Methanobacterium	0.7089	0.0137	AB	positive
										B805_Rhodoblastus	A144_Methanobacterium	-0.8707	0.0099	AB	negative
										F62_Nigrospora	A144_Methanobacterium	-0.7105	0.0198	AF	negative
										F3721_Mortierella	A144_Methanobacterium	0.6959	0.005	AF	positive
										F48_unidentified	A144_Methanobacterium	-0.6081	0.0198	AF	negative
										F67_unidentified	A144_Methanobacterium	0.6719	0.0433	AF	positive
										B896_uncultured	A8_Methanobacterium	0.8848	0.0198	AB	positive
										B417_o_NA	A8_Methanobacterium	0.6182	0.0297	AB	positive
										B525_Ferruginibacter	A8_Methanobacterium	-0.625	0.0198	AB	negative
										B395_f_uncultured	A8_Methanobacterium	0.8452	0.0099	AB	positive
										B133_uncultured Chloroflexi bacterium	A8_Methanobacterium	0.6328	0.0297	AB	positive
										B284_uncultured prokaryote	A8_Methanobacterium	0.8454	0.0198	AB	positive
										B464_uncultured	A8_Methanobacterium	-0.7647	0.0198	AB	negative
										B412_uncultured	A8_Methanobacterium	-0.9256	0.0099	AB	negative
										A33_uncultured methanogenic archaeon	A8_Methanobacterium	-0.7597	0.0297	A	negative
										F2911_Kurtzmanomyces	A8_Methanobacterium	0.6167	0.0396	AF	positive
										F670_Hannaella	A8_Methanobacterium	0.855	0.0099	AF	positive
										F41_Sarocladium	A8_Methanobacterium	-0.6241	0.0396	AF	negative
										F381_Fusarium	A8_Methanobacterium	0.7402	0.0297	AF	positive
										A51_Methanosaeta	B4537_uncultured	0.6303	0.005	AB	positive
										A63_Methanosarcina	B1530_f_AKYH767	0.7296	0.0197	AB	positive
										A10_Methanosaeta	B1_uncultured prokaryote	0.8494	0.0297	AB	positive
										F802_o_NA	A4_Methanosaeta	-0.6859	0.0198	AF	negative
										B1330_f_Sphingomonadaceae	A4_Methanosaeta	-0.6039	0.0495	AB	negative
										B231_Haliangium	A4_Methanosaeta	0.698	0.0297	AB	positive
										B171_Candidatus Koribacter	A4_Methanosaeta	-0.7154	0.0495	AB	negative
										B999_uncultured Acidobacteria bacterium	A4_Methanosaeta	0.7138	0.0198	AB	positive
										B762_uncultured Acidobacteria bacterium	A4_Methanosaeta	-0.6146	0.0396	AB	negative
										B133_uncultured Chloroflexi bacterium	A4_Methanosaeta	0.757	0.0297	AB	positive
										B492_Arenimonas	A4_Methanosaeta	0.6593	0.0396	AB	positive
										B2791_f_env.OPS 17	A4_Methanosaeta	0.6393	0.0198	AB	positive
										A7_f_uncultured	A4_Methanosaeta	0.941	0.0099	A	positive
										B259_Anaeromyxobacter	A4_Methanosaeta	0.7159	0.0198	AB	positive
										B122_Blastococcus	A4_Methanosaeta	0.7517	0.0495	AB	positive
										B694_uncultured prokaryote	A4_Methanosaeta	0.6391	0.0099	AB	positive
										F38_Phaeosphaeria	A4_Methanosaeta	-0.6256	0.0297	AF	negative
										F7_Cladosporium	A4_Methanosaeta	-0.6538	0.0495	AF	negative
										F4_Pseudeurotium	A4_Methanosaeta	-0.7179	0.0297	AF	negative
										F14_Pyrenochaetopsis	A4_Methanosaeta	-0.6512	0.0297	AF	negative
										B1330_f_Sphingomonadaceae	A58_Methanobacterium	0.7199	0.0198	AB	positive
										B447_wastewater metagenome	A58_Methanobacterium	-0.6962	0.0396	AB	negative
										B551_Gaiella	A58_Methanobacterium	0.8116	0.0198	AB	positive
										B11_f_SC-I-84	A58_Methanobacterium	0.7391	0.0198	AB	positive
										B464_uncultured	A58_Methanobacterium	0.6696	0.0495	AB	positive
										B890_f_Desulfobulbaceae	A58_Methanobacterium	0.737	0.0198	AB	positive
										B203_uncultured Sorangiineae bacterium	A58_Methanobacterium	0.7041	0.0396	AB	positive
										A7_f_uncultured	A58_Methanobacterium	-0.7554	0.0099	A	negative
										B259_Anaeromyxobacter	A58_Methanobacterium	-0.6513	0.0297	AB	negative
										B446_uncultured delta proteobacterium	A58_Methanobacterium	0.7316	0.0198	AB	positive
										B24_f_Micrococcaceae	A58_Methanobacterium	-0.6358	0.0495	AB	negative
										B940_Hymenobacter	A58_Methanobacterium	0.6178	0.0198	AB	positive
										F41_Sarocladium	A58_Methanobacterium	0.6677	0.0495	AF	positive
										B10_f_Xanthobacteraceae	A19_Methanocella	-0.7372	0.0396	AB	negative
										F108_o_NA	A19_Methanocella	0.6541	0.0198	AF	positive
										F747_unidentified	A19_Methanocella	-0.7115	0.0198	AF	negative
										B571_uncultured	A19_Methanocella	-0.7536	0.0198	AB	negative
										A23_uncultured methanogenic archaeon	A19_Methanocella	0.8118	0.0099	A	positive
										B973_Acidibacter	A19_Methanocella	-0.6856	0.0396	AB	negative
										B177_Desulfobacca	A19_Methanocella	0.693	0.0495	AB	positive
										B221_Nocardioides	A19_Methanocella	-0.6699	0.0198	AB	negative
										B976_metagenome	A19_Methanocella	0.6462	0.0495	AB	positive
										B212_f_SC-I-84	A19_Methanocella	-0.6833	0.0396	AB	negative
										A6_Candidatus Methanoperedens	A19_Methanocella	0.7398	0.0297	A	positive
										B19_uncultured soil bacterium	A19_Methanocella	-0.74	0.0297	AB	negative
										B68_Noviherbaspirillum	A19_Methanocella	0.7391	0.0198	AB	positive
										B528_RBG-16-58-14	A19_Methanocella	-0.6043	0.0297	AB	negative
										A232_uncultured euryarchaeote	A19_Methanocella	-0.704	0.0297	A	negative
										B304_f_UASB-TL25	A19_Methanocella	-0.7321	0.0198	AB	negative
										B3127_Actinobacteria bacterium CG2_30_50_142	A19_Methanocella	-0.6885	0.0099	AB	negative
										F31_Alternaria	A19_Methanocella	-0.8161	0.0297	AF	negative
										F36_Fusicolla	A19_Methanocella	0.6852	0.0495	AF	positive
										F46_Arnium	A19_Methanocella	-0.7083	0.0297	AF	negative
										F218_unidentified	A19_Methanocella	-0.6456	0.0198	AF	negative
										F38_Phaeosphaeria	A19_Methanocella	-0.7804	0.0396	AF	negative
										F48_unidentified	A19_Methanocella	-0.7571	0.0099	AF	negative
										F28_o_Helotiales	A19_Methanocella	0.7842	0.0297	AF	positive
										F71_Spirosphaera	A19_Methanocella	0.6545	0.0396	AF	positive
										F7_Cladosporium	A19_Methanocella	-0.7928	0.0198	AF	negative
										F52_Acremonium	A19_Methanocella	0.7661	0.0396	AF	positive
										F23_f_Nectriaceae	A19_Methanocella	0.7194	0.0396	AF	positive
										F440_Bullera	A19_Methanocella	-0.7233	0.0297	AF	negative
										F280_Cyphellophora	A19_Methanocella	-0.6589	0.0198	AF	negative
										F305_unidentified	A19_Methanocella	0.7452	0.0297	AF	positive
										F14_Pyrenochaetopsis	A19_Methanocella	-0.6621	0.0495	AF	negative
										F73_Cyberlindnera	A19_Methanocella	0.7388	0.0396	AF	positive
										A51_Methanosaeta	B501_uncultured Holophaga sp.	0.8025	0.005	AB	positive
										A63_Methanosarcina	B901_uncultured prokaryote	0.6151	0.0198	AB	positive
										A132_Methanosarcina	B241_Ferruginibacter	-0.6273	0.0495	AB	negative
										A40_Methanosaeta	B78_f_Anaerolineaceae	-0.6557	0.0396	AB	negative
										A40_Methanosaeta	B2373_uncultured bacterium	0.62	0.0334	AB	positive
										A281_Methanocella	F1065_Tetraplosphaeria	0.7832	0.0235	AF	positive
										A63_Methanosarcina	B552_uncultured bacterium	0.6219	0.0198	AB	positive
										A132_Methanosarcina	B5682_f_Sandaracinaceae	0.6057	0.0137	AB	positive
										A51_Methanosaeta	B1762_o_NA	0.6243	0.0433	AB	positive
										A51_Methanosaeta	B3059_uncultured bacterium	0.689	0.0235	AB	positive
										A59_Methanocella	F128_o_NA	0.7018	0.0198	AF	positive
										A51_Methanosaeta	B1773_uncultured	0.6711	0.0235	AB	positive
										A10_Methanosaeta	B1306_uncultured bacterium	-0.6627	0.0297	AB	negative
										A10_Methanosaeta	F985_o_NA	0.8375	0.0297	AF	positive
										A40_Methanosaeta	B3205_uncultured planctomycete	0.6545	0.005	AB	positive
										A51_Methanosaeta	B187_Terrabacter	0.6603	0.005	AB	positive
										A51_Methanosaeta	B162_Anaeromyxobacter	0.7122	0.0137	AB	positive
										A63_Methanosarcina	B5015_f_uncultured	0.6315	0.0289	AB	positive
										A59_Methanocella	B2948_o_OPB56	0.6128	0.0197	AB	positive
										A281_Methanocella	B10303_Candidatus Protochlamydia	0.6606	0.0137	AB	positive
										A40_Methanosaeta	B7614_f_Ruminococcaceae	0.6536	0.0334	AB	positive
										A40_Methanosaeta	B5767_Aquicella	0.7051	0.005	AB	positive
										A51_Methanosaeta	B191_MND1	0.692	0.005	AB	positive
										A40_Methanosaeta	B619_o_NA	0.6901	0.0137	AB	positive
										B1290_wastewater metagenome	A132_Methanosarcina	0.6304	0.0137	AB	positive
										B2036_f_Burkholderiaceae	A132_Methanosarcina	0.6673	0.0235	AB	positive
										B3429_Conexibacter	A132_Methanosarcina	0.6584	0.0235	AB	positive
										B3462_uncultured	A132_Methanosarcina	0.6907	0.0137	AB	positive
										B387_uncultured bacterium	A132_Methanosarcina	0.6831	0.0137	AB	positive
										B2138_o_NA	A132_Methanosarcina	0.6458	0.0235	AB	positive
										B9438_Candidatus Protochlamydia	A132_Methanosarcina	0.6379	0.0137	AB	positive
										B5143_uncultured Acidobacteria bacterium	A132_Methanosarcina	0.6448	0.005	AB	positive
										B10587_uncultured bacterium SHA-114	A132_Methanosarcina	0.6038	0.0137	AB	positive
										B1275_ADurb.Bin063-1	A132_Methanosarcina	0.7267	0.0137	AB	positive
										B379_Devosia	A132_Methanosarcina	0.6797	0.0137	AB	positive
										B2857_uncultured bacterium	A132_Methanosarcina	0.6357	0.0137	AB	positive
										A20_Rice Cluster I	A132_Methanosarcina	0.7827	0.0137	A	positive
										B6608_f_uncultured	A132_Methanosarcina	0.6389	0.0334	AB	positive
										B688_uncultured Planctomyces sp.	A132_Methanosarcina	0.6929	0.005	AB	positive
										A209_f_uncultured	A132_Methanosarcina	0.7144	0.005	A	positive
										B4053_Nitrospira	A132_Methanosarcina	0.6585	0.005	AB	positive
										B988_GOUTB8	A132_Methanosarcina	0.6779	0.0334	AB	positive
										B3410_f_Nitrosomonadaceae	A132_Methanosarcina	0.6323	0.005	AB	positive
										B1646_Flavobacterium	A132_Methanosarcina	0.7035	0.005	AB	positive
										B1978_o_NA	A132_Methanosarcina	0.6712	0.005	AB	positive
										B549_uncultured soil bacterium	A132_Methanosarcina	0.6447	0.005	AB	positive
										B852_Cryobacterium	A132_Methanosarcina	0.7529	0.005	AB	positive
										A25_uncultured methanogenic archaeon	A132_Methanosarcina	0.7976	0.0137	A	positive
										B655_f_Burkholderiaceae	A132_Methanosarcina	0.7139	0.005	AB	positive
										B1044_uncultured	A132_Methanosarcina	0.6809	0.0137	AB	positive
										B1098_uncultured beta proteobacterium	A132_Methanosarcina	0.6707	0.0334	AB	positive
										A32_o_NA	A132_Methanosarcina	0.8153	0.0137	A	positive
										B8122_Subgroup 10	A132_Methanosarcina	0.6255	0.005	AB	positive
										B1165_o_RBG-13-54-9	A132_Methanosarcina	0.6327	0.0137	AB	positive
										B2364_uncultured soil bacterium PBS-III-20	A132_Methanosarcina	0.6479	0.005	AB	positive
										F5189_Verrucoconiothyrium	A132_Methanosarcina	0.6157	0.0235	AF	positive
										F1543_Neodevriesia	A132_Methanosarcina	0.6827	0.019	AF	positive
										F1213_Sporobolomyces	A132_Methanosarcina	0.7324	0.005	AF	positive
										F89_Talaromyces	A132_Methanosarcina	0.6327	0.0297	AF	positive
										A51_Methanosaeta	B2467_Nitrospira	0.6836	0.0137	AB	positive
										A63_Methanosarcina	B2434_f_Sporichthyaceae	0.6855	0.0098	AB	positive
										A51_Methanosaeta	B2210_Candidatus Udaeobacter	0.6518	0.0334	AB	positive
										A40_Methanosaeta	B1598_Geobacter	0.704	0.0235	AB	positive
										A51_Methanosaeta	B1176_Candidatus Koribacter	0.7518	0.005	AB	positive
										A10_Methanosaeta	B302_Phycicoccus	-0.9146	0.0099	AB	negative
										A59_Methanocella	A24_uncultured methanogenic archaeon	0.6863	0.0198	A	positive
										A10_Methanosaeta	A14_Candidatus Nitrosotalea	-0.7216	0.0099	A	negative
										A63_Methanosarcina	A14_Candidatus Nitrosotalea	-0.6817	0.0396	A	negative
										A281_Methanocella	B10222_Chitinophaga	0.6313	0.0137	AB	positive
										A51_Methanosaeta	B6524_f_uncultured	0.6061	0.005	AB	positive
										A51_Methanosaeta	B2529_metagenome	0.6598	0.005	AB	positive
										A63_Methanosarcina	B2381_metagenome	0.6329	0.0395	AB	positive
										A51_Methanosaeta	B156_Candidatus Solibacter	0.7193	0.0137	AB	positive
										A281_Methanocella	B9503_Haliangium	0.6299	0.0235	AB	positive
										A281_Methanocella	B1129_metagenome	0.7898	0.0137	AB	positive
										A10_Methanosaeta	B1168_Desulfatiglans	-0.6314	0.0396	AB	negative
										A40_Methanosaeta	B6225_uncultured	0.6471	0.0137	AB	positive
										A40_Methanosaeta	B27_Sideroxydans	0.7755	0.0235	AB	positive
										A63_Methanosarcina	B316_uncultured soil bacterium	0.7117	0.0198	AB	positive
										A63_Methanosarcina	B108_uncultured prokaryote	0.6132	0.019	AB	positive
										A59_Methanocella	B155_Mycobacterium	0.6211	0.0297	AB	positive
										A10_Methanosaeta	B155_Mycobacterium	0.6333	0.0495	AB	positive
										A281_Methanocella	B3825_Caulobacter	0.6875	0.0235	AB	positive
										A281_Methanocella	B512_uncultured bacterium	0.6538	0.0334	AB	positive
										A51_Methanosaeta	B1355_f_Ruminococcaceae	0.6776	0.0137	AB	positive
										B710_Arenimonas	A281_Methanocella	0.7108	0.005	AB	positive
										B4186_o_Sva0485	A281_Methanocella	0.7049	0.0137	AB	positive
										B96_Geobacter	A281_Methanocella	0.7805	0.0137	AB	positive
										B5030_uncultured Bacteroidetes bacterium	A281_Methanocella	0.6003	0.005	AB	positive
										B1665_f_Pedosphaeraceae	A281_Methanocella	0.6486	0.0235	AB	positive
										B1235_Bradyrhizobium	A281_Methanocella	0.7052	0.0137	AB	positive
										B3161_uncultured Nitrosomonadaceae bacterium	A281_Methanocella	0.7494	0.005	AB	positive
										B449_uncultured bacterium 213	A281_Methanocella	0.7483	0.0137	AB	positive
										B276_Candidatus Koribacter	A281_Methanocella	0.6964	0.005	AB	positive
										B1137_Syntrophobacter	A281_Methanocella	0.7337	0.005	AB	positive
										B2558_uncultured	A281_Methanocella	0.6169	0.0235	AB	positive
										B1093_Nitrospira	A281_Methanocella	0.6909	0.0137	AB	positive
										B2913_f_BIrii41	A281_Methanocella	0.7066	0.0235	AB	positive
										B2920_uncultured Myxococcales bacterium	A281_Methanocella	0.6958	0.0137	AB	positive
										B9511_Clostridium sensu stricto 1	A281_Methanocella	0.6824	0.0235	AB	positive
										B7488_Ruminiclostridium 1	A281_Methanocella	0.6485	0.005	AB	positive
										B160_uncultured	A281_Methanocella	-0.8242	0.0198	AB	negative
										B1502_uncultured Catenulispora sp.	A281_Methanocella	0.6216	0.0235	AB	positive
										B478_uncultured Prosthecobacter sp.	A281_Methanocella	0.7132	0.0235	AB	positive
										B3312_o_Rhizobiales	A281_Methanocella	0.6522	0.0137	AB	positive
										B3_uncultured prokaryote	A281_Methanocella	-0.6448	0.0396	AB	negative
										B9824_Aquicella	A281_Methanocella	0.6101	0.0137	AB	positive
										B246_uncultured Rhodocyclaceae bacterium	A281_Methanocella	-0.6599	0.0396	AB	negative
										B169_Cryobacterium	A281_Methanocella	0.6834	0.0137	AB	positive
										B2105_uncultured	A281_Methanocella	0.6705	0.005	AB	positive
										F1499_Zymoseptoria	A281_Methanocella	0.6224	0.0137	AF	positive
										F3292_Tetracladium	A281_Methanocella	0.7142	0.005	AF	positive
										F3984_Amphobotrys	A281_Methanocella	0.624	0.0137	AF	positive
										F381_Fusarium	A281_Methanocella	0.6518	0.019	AF	positive
										F346_unidentified	A281_Methanocella	0.6971	0.005	AF	positive
										A51_Methanosaeta	A547_uncultured euryarchaeote	0.6382	0.0137	A	positive
										A59_Methanocella	B1718_uncultured	0.7708	0.0098	AB	positive
										A40_Methanosaeta	B152_uncultured prokaryote	0.7274	0.0137	AB	positive
										A63_Methanosarcina	B1517_uncultured prokaryote	0.6477	0.0198	AB	positive
										A40_Methanosaeta	B4867_Desulfatiglans	0.6252	0.0137	AB	positive
										A51_Methanosaeta	B570_uncultured Conexibacter sp.	0.7248	0.0137	AB	positive
										A63_Methanosarcina	B860_metagenome	0.704	0.0198	AB	positive
										A40_Methanosaeta	B9889_BSV13	0.6556	0.0137	AB	positive
										A51_Methanosaeta	B678_f_Burkholderiaceae	0.7408	0.0137	AB	positive
										A51_Methanosaeta	B3235_f_uncultured	0.6886	0.005	AB	positive
										A59_Methanocella	B780_f_uncultured	0.847	0.0098	AB	positive
										A40_Methanosaeta	B1801_uncultured Prosthecobacter sp.	0.7182	0.0137	AB	positive
										A40_Methanosaeta	A95_uncultured euryarchaeote	0.7414	0.0137	A	positive
										A40_Methanosaeta	A134_uncultured	0.7403	0.0235	A	positive
										A63_Methanosarcina	B973_Acidibacter	-0.7061	0.0396	AB	negative
										A10_Methanosaeta	B59_f_Intrasporangiaceae	-0.9195	0.0099	AB	negative
										A63_Methanosarcina	B1437_uncultured	0.6638	0.0098	AB	positive
										A51_Methanosaeta	B2887_bacterium Ellin7530	0.6993	0.005	AB	positive
										A40_Methanosaeta	B3751_uncultured bacterium 213	0.7493	0.0137	AB	positive
										A51_Methanosaeta	B179_Haliangium	-0.8891	0.0198	AB	negative
										A40_Methanosaeta	B1413_Subgroup 10	0.607	0.0433	AB	positive
										A59_Methanocella	B6494_Roseomonas	0.7294	0.0098	AB	positive
										A5_uncultured methanogenic archaeon	A59_Methanocella	0.6553	0.0297	A	positive
										B124_Massilia	A59_Methanocella	0.8303	0.0098	AB	positive
										B746_Candidatus Udaeobacter	A59_Methanocella	0.6511	0.0396	AB	positive
										B255_uncultured	A59_Methanocella	0.8635	0.0197	AB	positive
										B8206_Desulfosporosinus	A59_Methanocella	0.6796	0.0197	AB	positive
										B1547_Flavobacterium	A59_Methanocella	0.6753	0.0396	AB	positive
										B475_metagenome	A59_Methanocella	0.6228	0.0297	AB	positive
										B184_Candidatus Nitrotoga	A59_Methanocella	0.6841	0.0297	AB	positive
										F167_Phialocephala	A59_Methanocella	0.6501	0.0297	AF	positive
										A40_Methanosaeta	B44_uncultured Alkaliflexus sp.	0.6366	0.0297	AB	positive
										A51_Methanosaeta	B1198_o_Sva0485	0.7057	0.0137	AB	positive
										B54_Oryzihumus	A10_Methanosaeta	0.7798	0.0198	AB	positive
										B221_Nocardioides	A10_Methanosaeta	-0.6078	0.0297	AB	negative
										B333_Arenimonas	A10_Methanosaeta	-0.681	0.0396	AB	negative
										B4010_Cellvibrio	A10_Methanosaeta	-0.6826	0.0297	AB	negative
										B3380_uncultured	A10_Methanosaeta	-0.6401	0.0396	AB	negative
										B49_uncultured prokaryote	A10_Methanosaeta	0.755	0.0198	AB	positive
										A89_Methanomassiliicoccus	A10_Methanosaeta	-0.7362	0.0297	A	negative
										B90_uncultured	A10_Methanosaeta	0.7493	0.0099	AB	positive
										F92_Paraphaeosphaeria	A10_Methanosaeta	0.6749	0.0495	AF	positive
										F30_f_Didymellaceae	A10_Methanosaeta	-0.6386	0.0495	AF	negative
										F46_Arnium	A10_Methanosaeta	-0.7752	0.0099	AF	negative
										F62_Nigrospora	A10_Methanosaeta	-0.7152	0.0297	AF	negative
										F70_Mortierella	A10_Methanosaeta	-0.7319	0.0297	AF	negative
										F218_unidentified	A10_Methanosaeta	-0.6682	0.0099	AF	negative
										F294_Pyricularia	A10_Methanosaeta	-0.6621	0.0198	AF	negative
										F199_unidentified	A10_Methanosaeta	-0.7251	0.0297	AF	negative
										F264_Papiliotrema	A10_Methanosaeta	-0.6657	0.0297	AF	negative
										F147_Papiliotrema	A10_Methanosaeta	-0.7979	0.0297	AF	negative
										F6_Pseudeurotium	A10_Methanosaeta	0.776	0.0297	AF	positive
										F377_Neobulgaria	A10_Methanosaeta	-0.6773	0.0297	AF	negative
										F109_Myrmecridium	A10_Methanosaeta	-0.7235	0.0198	AF	negative
										F361_Saitozyma	A10_Methanosaeta	-0.6996	0.0297	AF	negative
										F12_Pseudeurotium	A10_Methanosaeta	0.814	0.0198	AF	positive
										A40_Methanosaeta	B9054_Haliangium	0.6313	0.0235	AB	positive
										A51_Methanosaeta	B600_uncultured	0.68	0.005	AB	positive
										A51_Methanosaeta	B837_o_Frankiales	0.7558	0.0137	AB	positive
										A40_Methanosaeta	B8545_Chthoniobacter	0.6733	0.005	AB	positive
										A63_Methanosarcina	B976_metagenome	0.6074	0.0099	AB	positive
										A51_Methanosaeta	B1007_Subgroup 10	0.7164	0.005	AB	positive
										A63_Methanosarcina	B9_f_Rhodanobacteraceae	-0.7138	0.0099	AB	negative
										A40_Methanosaeta	B7038_uncultured organism	0.6459	0.0235	AB	positive
										A51_Methanosaeta	B1155_Vicinamibacter	0.7176	0.0137	AB	positive
										A51_Methanosaeta	B547_ADurb.Bin063-1	0.7694	0.005	AB	positive
										B863_uncultured bacterium	A40_Methanosaeta	0.6506	0.0289	AB	positive
										B663_Arenimonas	A40_Methanosaeta	0.6216	0.019	AB	positive
										B8258_Caulobacter	A40_Methanosaeta	0.7072	0.005	AB	positive
										B939_Rhodoferax	A40_Methanosaeta	0.7185	0.0334	AB	positive
										B1054_uncultured Bellilinea sp.	A40_Methanosaeta	0.6425	0.005	AB	positive
										B17_uncultured Thermaerobacter sp.	A40_Methanosaeta	-0.87	0.0099	AB	negative
										B467_f_uncultured	A40_Methanosaeta	0.656	0.0137	AB	positive
										B916_uncultured Holophaga sp.	A40_Methanosaeta	0.6402	0.005	AB	positive
										B7800_Spirochaeta 2	A40_Methanosaeta	0.6811	0.0137	AB	positive
										B128_Syntrophorhabdus	A40_Methanosaeta	-0.8396	0.0198	AB	negative
										B164_GOUTB8	A40_Methanosaeta	0.6846	0.005	AB	positive
										B2280_uncultured prokaryote	A40_Methanosaeta	0.7433	0.0137	AB	positive
										B254_Sh765B-TzT-35	A40_Methanosaeta	-0.6969	0.0297	AB	negative
										B113_uncultured Sphingobacteriales bacterium	A40_Methanosaeta	0.7564	0.005	AB	positive
										B7160_f_Acetobacteraceae	A40_Methanosaeta	0.7215	0.005	AB	positive
										B5979_metagenome	A40_Methanosaeta	0.6439	0.0235	AB	positive
										F755_Fusarium	A40_Methanosaeta	0.661	0.005	AF	positive
										F32_Dimorphospora	A40_Methanosaeta	-0.8476	0.0198	AF	negative
										F264_Papiliotrema	A40_Methanosaeta	-0.7244	0.0099	AF	negative
										F9_o_NA	A40_Methanosaeta	0.6786	0.0198	AF	positive
										F2083_Cladosporium	A40_Methanosaeta	0.7509	0.005	AF	positive
										A51_Methanosaeta	B3798_Geobacter	0.6262	0.0433	AB	positive
										B11772_uncultured Armatimonadetes bacterium	A51_Methanosaeta	0.6041	0.0235	AB	positive
										B768_uncultured proteobacterium	A51_Methanosaeta	0.7196	0.0137	AB	positive
										B4115_uncultured bacterium	A51_Methanosaeta	0.6347	0.005	AB	positive
										B6071_Labilithrix	A51_Methanosaeta	0.6245	0.005	AB	positive
										B568_o_Gaiellales	A51_Methanosaeta	0.6906	0.0137	AB	positive
										B1823_Marmoricola	A51_Methanosaeta	0.6991	0.0235	AB	positive
										B11213_Nocardioides	A51_Methanosaeta	0.6087	0.0137	AB	positive
										B77_Candidatus Nitrotoga	A51_Methanosaeta	0.7439	0.0235	AB	positive
										B8609_Flavobacterium	A51_Methanosaeta	0.6444	0.0137	AB	positive
										B4671_Mycobacterium	A51_Methanosaeta	0.7113	0.0235	AB	positive
										B767_uncultured	A51_Methanosaeta	0.7561	0.0137	AB	positive
										B912_Phenylobacterium	A51_Methanosaeta	0.7317	0.0137	AB	positive
										B546_Clostridium sensu stricto 1	A51_Methanosaeta	0.6199	0.0235	AB	positive
										B92_uncultured Acidobacteriales bacterium	A51_Methanosaeta	-0.8823	0.0198	AB	negative
										F680_Hannaella	A51_Methanosaeta	0.7315	0.005	AF	positive
										F557_Paraphoma	A51_Methanosaeta	0.6227	0.0091	AF	positive
										F109_Myrmecridium	A51_Methanosaeta	0.7341	0.0198	AF	positive
										F1681_Hannaella	A51_Methanosaeta	0.6407	0.005	AF	positive
										F41_Sarocladium	A51_Methanosaeta	-0.6393	0.0099	AF	negative
										F374_Fusarium	A51_Methanosaeta	0.6068	0.0137	AF	positive
										A63_Methanosarcina	B371_uncultured	0.671	0.0099	AB	positive
										A63_Methanosarcina	B863_uncultured bacterium	0.6593	0.0197	AB	positive
										A63_Methanosarcina	B2486_Fonticella	0.6363	0.0098	AB	positive
										B2_uncultured prokaryote	A63_Methanosarcina	-0.9309	0.0198	AB	negative
										B180_Actinobacteria bacterium RBG_19FT_COMBO_70_19	A63_Methanosarcina	0.6142	0.0198	AB	positive
										F92_Paraphaeosphaeria	A63_Methanosarcina	0.8565	0.0099	AF	positive
										F46_Arnium	A63_Methanosarcina	-0.7741	0.0099	AF	negative
										F95_Phaeosphaeria	A63_Methanosarcina	-0.8876	0.0099	AF	negative
										F3_Solicoccozyma	A63_Methanosarcina	0.8982	0.0099	AF	positive
										F28_o_Helotiales	A63_Methanosarcina	0.701	0.0495	AF	positive
										F71_Spirosphaera	A63_Methanosarcina	0.8388	0.0099	AF	positive
										F588_Mortierella	A63_Methanosarcina	0.8385	0.0098	AF	positive
										F10_Mrakia	A63_Methanosarcina	0.9021	0.0099	AF	positive
										F264_Papiliotrema	A63_Methanosarcina	-0.6974	0.0297	AF	negative
										F44_Setophoma	A63_Methanosarcina	-0.7727	0.0198	AF	negative
										F1_Guehomyces	A63_Methanosarcina	0.8781	0.0099	AF	positive
										F1555_o_NA	A63_Methanosarcina	0.8233	0.0098	AF	positive
										F6_Pseudeurotium	A63_Methanosarcina	0.8938	0.0099	AF	positive
										F52_Acremonium	A63_Methanosarcina	0.6333	0.0198	AF	positive
										F23_f_Nectriaceae	A63_Methanosarcina	0.6816	0.0495	AF	positive
										F440_Bullera	A63_Methanosarcina	-0.7323	0.0198	AF	negative
										F280_Cyphellophora	A63_Methanosarcina	-0.645	0.0495	AF	negative
										F12_Pseudeurotium	A63_Methanosarcina	0.7842	0.0198	AF	positive
										F104_o_Pleosporales	A63_Methanosarcina	0.831	0.0197	AF	positive
										F73_Cyberlindnera	A63_Methanosarcina	0.8025	0.0099	AF	positive
										F15_o_Sordariales	A63_Methanosarcina	0.8977	0.0099	AF	positive

## Sheet: CJ1(2018)
Edge of methanogen and bacterial functional groups										Edge of methanogens
from	to	cor	p_value	Association	Category	Relationship				from	to	cor	p_value	Association	Category
B474_Methylobacter	A31_Methanosaeta	0.6145	0.0334	AB	positive	Methanogen-Methanotroph				A47_Methanobacterium	A1_unidentified archaeon	-0.751	0.0099	A	negative
B13_Methylocystis	A44_Methanosaeta	-0.6554	0.0396	AB	negative	Methanogen-Methanotroph				A2_o_NA	A10_Methanosaeta	-0.6195	0.0495	A	negative
B474_Methylobacter	A63_Methanosarcina	0.6658	0.0137	AB	positive	Methanogen-Methanotroph				B10_f_Xanthobacteraceae	A10_Methanosaeta	0.7065	0.0099	AB	positive
B2278_Methylobacter	A8_Methanobacterium	-0.6474	0.0495	AB	negative	Methanogen-Methanotroph				B1192_Polycyclovorans	A10_Methanosaeta	-0.7437	0.0099	AB	negative
B271_Anaerolinea	A21_Methanosarcina	0.6073	0.0396	AB	positive	Methanogen-Bacterial decomposer				B130_uncultured	A10_Methanosaeta	0.7859	0.0198	AB	positive
B271_Anaerolinea	A55_Methanosarcina	-0.8224	0.0198	AB	negative	Methanogen-Bacterial decomposer				B1323_f_SC-I-84	A10_Methanosaeta	0.6197	0.0396	AB	positive
B3013_Anaerolinea	A78_Methanocella	0.6562	0.0137	AB	positive	Methanogen-Bacterial decomposer				B14_uncultured Nitrospirae bacterium	A10_Methanosaeta	0.755	0.0198	AB	positive
B433_Syntrophobacter	A55_Methanosarcina	0.7525	0.005	AB	positive	Methanogen-Syntroph				B200_o_Sva0485	A10_Methanosaeta	0.747	0.0297	AB	positive
B178_Geobacter	A12_Methanobacterium	-0.6942	0.0198	AB	negative	Methanogen-Non-acetogenic syntroph				B218_uncultured Burkholderiaceae bacterium	A10_Methanosaeta	-0.6483	0.0198	AB	negative
B96_Geobacter	A12_Methanobacterium	-0.8565	0.0099	AB	negative	Methanogen-Non-acetogenic syntroph				B224_uncultured prokaryote	A10_Methanosaeta	-0.6898	0.0495	AB	negative
B4023_Geobacter	A55_Methanosarcina	0.6324	0.005	AB	positive	Methanogen-Non-acetogenic syntroph				B2556_Lacunisphaera	A10_Methanosaeta	-0.6004	0.0495	AB	negative
B388_Anaeromyxobacter	A63_Methanosarcina	0.6356	0.005	AB	positive	Methanogen-Non-acetogenic syntroph				B27_Sideroxydans	A10_Methanosaeta	-0.9269	0.0099	AB	negative
										B387_uncultured bacterium	A10_Methanosaeta	-0.6714	0.0198	AB	negative
										B4355_metagenome	A10_Methanosaeta	-0.6133	0.0297	AB	negative
										B461_uncultured bacterium	A10_Methanosaeta	-0.6946	0.0396	AB	negative
										B494_uncultured	A10_Methanosaeta	-0.6949	0.0396	AB	negative
										B560_uncultured	A10_Methanosaeta	-0.7142	0.0099	AB	negative
										B656_o_NA	A10_Methanosaeta	-0.6003	0.0396	AB	negative
										B684_o_NA	A10_Methanosaeta	0.608	0.0495	AB	positive
										B748_Pirellula	A10_Methanosaeta	-0.6351	0.0495	AB	negative
										F1300_o_NA	A10_Methanosaeta	0.7649	0.0198	AF	positive
										F1402_unidentified	A10_Methanosaeta	-0.65	0.0396	AF	negative
										F142_Mortierella	A10_Methanosaeta	-0.6527	0.0495	AF	negative
										F143_unidentified	A10_Methanosaeta	0.6112	0.0396	AF	positive
										F154_o_NA	A10_Methanosaeta	-0.7655	0.0099	AF	negative
										F1649_o_NA	A10_Methanosaeta	-0.6442	0.0396	AF	negative
										F188_unidentified	A10_Methanosaeta	-0.6121	0.0495	AF	negative
										F1928_unidentified	A10_Methanosaeta	-0.6539	0.0198	AF	negative
										F22_Mortierella	A10_Methanosaeta	-0.7977	0.0099	AF	negative
										F237_Fusarium	A10_Methanosaeta	0.6053	0.0495	AF	positive
										F2962_unidentified	A10_Methanosaeta	-0.756	0.0099	AF	negative
										F320_unidentified	A10_Methanosaeta	0.7594	0.0198	AF	positive
										F533_o_Hypocreales	A10_Methanosaeta	-0.7755	0.0198	AF	negative
										F541_Neobulgaria	A10_Methanosaeta	0.7479	0.0396	AF	positive
										F610_Mortierella	A10_Methanosaeta	0.8852	0.0099	AF	positive
										F72_o_NA	A10_Methanosaeta	-0.6112	0.0495	AF	negative
										F81_Schizothecium	A10_Methanosaeta	0.73	0.0297	AF	positive
										F881_unidentified	A10_Methanosaeta	-0.7167	0.0396	AF	negative
										F93_o_NA	A10_Methanosaeta	-0.6605	0.0495	AF	negative
										B1188_uncultured bacterium	A12_Methanobacterium	-0.6715	0.0099	AB	negative
										B128_Syntrophorhabdus	A12_Methanobacterium	0.6585	0.0495	AB	positive
										B1341_uncultured	A12_Methanobacterium	-0.7233	0.0099	AB	negative
										B1664_Candidatus Nitrotoga	A12_Methanobacterium	-0.6445	0.0297	AB	negative
										B178_Geobacter	A12_Methanobacterium	-0.6942	0.0198	AB	negative
										B210_Candidatus Solibacter	A12_Methanobacterium	-0.6195	0.0396	AB	negative
										B272_uncultured Chlorobi bacterium	A12_Methanobacterium	-0.6309	0.0495	AB	negative
										B287_uncultured planctomycete	A12_Methanobacterium	-0.7025	0.0099	AB	negative
										B29_Defluviicoccus	A12_Methanobacterium	0.7138	0.0198	AB	positive
										B296_IS-44	A12_Methanobacterium	-0.7148	0.0396	AB	negative
										B297_o_NA	A12_Methanobacterium	-0.8516	0.0099	AB	negative
										B3096_o_NA	A12_Methanobacterium	-0.6411	0.0297	AB	negative
										B4243_uncultured bacterium	A12_Methanobacterium	-0.8016	0.0099	AB	negative
										B495_o_Betaproteobacteriales	A12_Methanobacterium	-0.801	0.0198	AB	negative
										B545_beta proteobacterium JGI 0001003-N18	A12_Methanobacterium	0.7662	0.0198	AB	positive
										B5487_uncultured bacterium	A12_Methanobacterium	-0.7111	0.0099	AB	negative
										B550_Sva0081 sediment group	A12_Methanobacterium	0.9336	0.0099	AB	positive
										B556_uncultured Armatimonadetes bacterium	A12_Methanobacterium	-0.8072	0.0099	AB	negative
										B594_metagenome	A12_Methanobacterium	-0.6483	0.0198	AB	negative
										B598_Clostridium sensu stricto 13	A12_Methanobacterium	0.746	0.0198	AB	positive
										B625_o_NA	A12_Methanobacterium	-0.6177	0.0198	AB	negative
										B633_o_NA	A12_Methanobacterium	-0.6862	0.0396	AB	negative
										B717_uncultured Acidobacteriales bacterium	A12_Methanobacterium	0.654	0.0495	AB	positive
										B771_o_NA	A12_Methanobacterium	0.6434	0.0396	AB	positive
										B781_o_Acidobacteriales	A12_Methanobacterium	-0.6259	0.0396	AB	negative
										B9_f_Rhodanobacteraceae	A12_Methanobacterium	0.6994	0.0297	AB	positive
										B96_Geobacter	A12_Methanobacterium	-0.8565	0.0099	AB	negative
										B97_Gaiella	A12_Methanobacterium	0.6748	0.0495	AB	positive
										F113_Setophoma	A12_Methanobacterium	-0.7478	0.0198	AF	negative
										F1372_unidentified	A12_Methanobacterium	-0.6596	0.0099	AF	negative
										F1473_unidentified	A12_Methanobacterium	-0.7247	0.0099	AF	negative
										F170_unidentified	A12_Methanobacterium	-0.7919	0.0099	AF	negative
										F194_Emericellopsis	A12_Methanobacterium	0.7815	0.0099	AF	positive
										F207_o_Tremellales	A12_Methanobacterium	0.6561	0.0297	AF	positive
										F2271_unidentified	A12_Methanobacterium	-0.7724	0.0297	AF	negative
										F232_Entoloma	A12_Methanobacterium	-0.6039	0.0396	AF	negative
										F3245_unidentified	A12_Methanobacterium	-0.7723	0.0099	AF	negative
										F388_o_NA	A12_Methanobacterium	0.6164	0.0495	AF	positive
										F5_Schizothecium	A12_Methanobacterium	0.7636	0.0099	AF	positive
										F611_unidentified	A12_Methanobacterium	-0.6756	0.0198	AF	negative
										A47_Methanobacterium	A130_uncultured archaeon	0.6263	0.0137	A	positive
										A4_Methanosaeta	A156_uncultured archaeon	0.6996	0.0198	A	positive
										A44_Methanosaeta	A156_uncultured archaeon	0.6922	0.0297	A	positive
										A21_Methanosarcina	A16_Candidatus Nitrocosmicus	0.7445	0.0297	A	positive
										A21_Methanosarcina	A19_Methanocella	-0.691	0.0297	A	negative
										A26_uncultured Methanomicrobiales archaeon	A19_Methanocella	-0.7008	0.0297	A	negative
										A6_Candidatus Methanoperedens	A19_Methanocella	-0.6348	0.0396	A	negative
										A7_f_uncultured	A19_Methanocella	-0.6201	0.0495	A	negative
										B123_Ellin6067	A19_Methanocella	0.721	0.0099	AB	positive
										B1325_f_Hydrogenedensaceae	A19_Methanocella	-0.634	0.0297	AB	negative
										B1982_uncultured Banisveld landfill bacterium BVC56	A19_Methanocella	-0.6464	0.0495	AB	negative
										B21_f_Xanthobacteraceae	A19_Methanocella	0.6801	0.0297	AB	positive
										B2777_uncultured	A19_Methanocella	-0.7389	0.0198	AB	negative
										B330_uncultured Gemmatimonadetes bacterium	A19_Methanocella	-0.6848	0.0297	AB	negative
										B44_uncultured Alkaliflexus sp.	A19_Methanocella	0.6152	0.0495	AB	positive
										B564_Pseudomonas	A19_Methanocella	0.6179	0.0495	AB	positive
										B762_uncultured Acidobacteria bacterium	A19_Methanocella	0.6632	0.0297	AB	positive
										B80_ADurb.Bin063-1	A19_Methanocella	0.7654	0.0198	AB	positive
										B872_uncultured Pelobacter sp.	A19_Methanocella	0.754	0.0099	AB	positive
										B969_f_uncultured	A19_Methanocella	-0.6498	0.0396	AB	negative
										F1272_o_Eurotiales	A19_Methanocella	-0.6354	0.0297	AF	negative
										F1497_unidentified	A19_Methanocella	-0.638	0.0396	AF	negative
										F15_o_Sordariales	A19_Methanocella	0.8065	0.0099	AF	positive
										F1808_Pseudaleuria	A19_Methanocella	0.6989	0.0396	AF	positive
										F253_unidentified	A19_Methanocella	0.7487	0.0099	AF	positive
										F26_unidentified	A19_Methanocella	0.6863	0.0297	AF	positive
										F267_o_Chaetothyriales	A19_Methanocella	-0.7432	0.0198	AF	negative
										F268_o_NA	A19_Methanocella	-0.9175	0.0198	AF	negative
										F32_Dimorphospora	A19_Methanocella	0.8833	0.0099	AF	positive
										F341_o_NA	A19_Methanocella	0.6011	0.0396	AF	positive
										F58_unidentified	A19_Methanocella	-0.6079	0.0495	AF	negative
										F76_f_Hyaloscyphaceae	A19_Methanocella	-0.6402	0.0297	AF	negative
										F981_unidentified	A19_Methanocella	-0.65	0.0495	AF	negative
										A31_Methanosaeta	A20_Rice Cluster I	-0.8228	0.0099	A	negative
										A36_Methanosarcina	A20_Rice Cluster I	-0.6577	0.0495	A	negative
										A63_Methanosarcina	A20_Rice Cluster I	-0.8431	0.0198	A	negative
										A61_Methanosaeta	A209_f_uncultured	0.6414	0.0433	A	positive
										A8_Methanobacterium	A209_f_uncultured	-0.7895	0.0198	A	negative
										A24_uncultured methanogenic archaeon	A21_Methanosarcina	0.6621	0.0495	A	positive
										A36_Methanosarcina	A21_Methanosarcina	-0.6087	0.0495	A	negative
										A7_f_uncultured	A21_Methanosarcina	0.9225	0.0099	A	positive
										B108_uncultured prokaryote	A21_Methanosarcina	-0.6474	0.0495	AB	negative
										B117_uncultured Ferrimicrobium sp.	A21_Methanosarcina	0.6866	0.0396	AB	positive
										B1213_uncultured prokaryote	A21_Methanosarcina	-0.6752	0.0198	AB	negative
										B124_Massilia	A21_Methanosarcina	-0.6743	0.0297	AB	negative
										B1683_uncultured	A21_Methanosarcina	-0.6076	0.0297	AB	negative
										B187_Terrabacter	A21_Methanosarcina	0.6347	0.0495	AB	positive
										B195_Ellin6067	A21_Methanosarcina	-0.656	0.0396	AB	negative
										B231_Haliangium	A21_Methanosarcina	-0.6706	0.0198	AB	negative
										B2386_uncultured proteobacterium	A21_Methanosarcina	-0.669	0.0396	AB	negative
										B271_Anaerolinea	A21_Methanosarcina	0.6073	0.0396	AB	positive
										B2747_Cyanothece PCC-8801	A21_Methanosarcina	-0.623	0.0396	AB	negative
										B385_uncultured	A21_Methanosarcina	-0.6305	0.0495	AB	negative
										B491_Sideroxydans	A21_Methanosarcina	0.6984	0.0495	AB	positive
										B602_Pseudolabrys	A21_Methanosarcina	-0.6411	0.0396	AB	negative
										B606_unidentified	A21_Methanosarcina	-0.6385	0.0396	AB	negative
										B61_Ellin6067	A21_Methanosarcina	0.6664	0.0297	AB	positive
										B850_uncultured	A21_Methanosarcina	0.7444	0.0198	AB	positive
										B872_uncultured Pelobacter sp.	A21_Methanosarcina	-0.627	0.0396	AB	negative
										F117_o_Sordariales	A21_Methanosarcina	-0.7267	0.0198	AF	negative
										F1497_unidentified	A21_Methanosarcina	0.8042	0.0198	AF	positive
										F1568_unidentified	A21_Methanosarcina	-0.6203	0.0099	AF	negative
										F18_Schizothecium	A21_Methanosarcina	-0.6691	0.0297	AF	negative
										F278_Mortierella	A21_Methanosarcina	-0.6468	0.0495	AF	negative
										F32_Dimorphospora	A21_Methanosarcina	-0.7775	0.0198	AF	negative
										F98_f_Hypocreales_fam_Incertae_sedis	A21_Methanosarcina	0.6313	0.0198	AF	positive
										A27_Methanosaeta	A23_uncultured methanogenic archaeon	0.6969	0.0099	A	positive
										B107_f_Micrococcaceae	A27_Methanosaeta	0.744	0.0099	AB	positive
										B120_uncultured Burkholderiaceae bacterium	A27_Methanosaeta	-0.6067	0.0495	AB	negative
										B1322_uncultured	A27_Methanosaeta	0.7089	0.0098	AB	positive
										B1513_uncultured bacterium	A27_Methanosaeta	0.613	0.0296	AB	positive
										B1637_Ignavibacteria bacterium RIFCSPLOWO2_12_FULL_56_21	A27_Methanosaeta	0.6717	0.0197	AB	positive
										B2061_uncultured bacterium	A27_Methanosaeta	0.757	0.0098	AB	positive
										B4446_uncultured bacterium	A27_Methanosaeta	0.663	0.0098	AB	positive
										B521_Arenimonas	A27_Methanosaeta	0.78	0.0197	AB	positive
										B5471_o_NA	A27_Methanosaeta	0.6948	0.0098	AB	positive
										B649_f_SC-I-84	A27_Methanosaeta	0.6346	0.0197	AB	positive
										B6901_f_env.OPS 17	A27_Methanosaeta	0.6044	0.0197	AB	positive
										B705_Clostridium sensu stricto 12	A27_Methanosaeta	0.721	0.0098	AB	positive
										B7250_mle1-7	A27_Methanosaeta	0.6982	0.0098	AB	positive
										B79_f_SC-I-84	A27_Methanosaeta	-0.6984	0.0099	AB	negative
										B836_Sh765B-TzT-35	A27_Methanosaeta	0.8138	0.0098	AB	positive
										B964_Candidatus Berkiella	A27_Methanosaeta	0.6014	0.0297	AB	positive
										F1_Guehomyces	A27_Methanosaeta	-0.6621	0.0396	AF	negative
										F138_Rhizophydium	A27_Methanosaeta	-0.6439	0.0297	AF	negative
										F1577_Rhizophydium	A27_Methanosaeta	0.8178	0.0098	AF	positive
										F158_o_NA	A27_Methanosaeta	-0.66	0.0198	AF	negative
										F1604_o_NA	A27_Methanosaeta	0.7806	0.0296	AF	positive
										F17_Cladosporium	A27_Methanosaeta	-0.6668	0.0396	AF	negative
										F1742_unidentified	A27_Methanosaeta	0.7767	0.0197	AF	positive
										F1959_unidentified	A27_Methanosaeta	0.7685	0.0099	AF	positive
										F2320_unidentified	A27_Methanosaeta	0.6477	0.0197	AF	positive
										F2400_o_NA	A27_Methanosaeta	0.6684	0.0197	AF	positive
										F3197_o_NA	A27_Methanosaeta	0.6649	0.0099	AF	positive
										F350_unidentified	A27_Methanosaeta	0.664	0.0396	AF	positive
										F3644_o_NA	A27_Methanosaeta	0.6975	0.0197	AF	positive
										F387_o_NA	A27_Methanosaeta	0.6137	0.0289	AF	positive
										F472_unidentified	A27_Methanosaeta	-0.6813	0.0297	AF	negative
										F54_unidentified	A27_Methanosaeta	-0.6713	0.0396	AF	negative
										F649_unidentified	A27_Methanosaeta	0.6614	0.0099	AF	positive
										F80_o_Hypocreales	A27_Methanosaeta	-0.7291	0.0198	AF	negative
										A55_Methanosarcina	A278_Methanomassiliicoccus	0.623	0.005	A	positive
										A46_Methanosaeta	A3_o_NA	-0.6284	0.0495	A	negative
										A78_Methanocella	A3_o_NA	-0.625	0.0198	A	negative
										A53_uncultured euryarchaeote	A31_Methanosaeta	0.6671	0.0137	A	positive
										A63_Methanosarcina	A31_Methanosaeta	0.6745	0.005	A	positive
										B1_uncultured prokaryote	A31_Methanosaeta	0.6522	0.0198	AB	positive
										B1007_Subgroup 10	A31_Methanosaeta	0.6059	0.005	AB	positive
										B101_o_S085	A31_Methanosaeta	-0.8099	0.0198	AB	negative
										B106_Oryzihumus	A31_Methanosaeta	-0.8134	0.0198	AB	negative
										B179_Haliangium	A31_Methanosaeta	0.6761	0.0137	AB	positive
										B193_Sideroxydans	A31_Methanosaeta	-0.768	0.0198	AB	negative
										B203_uncultured Sorangiineae bacterium	A31_Methanosaeta	-0.8126	0.0198	AB	negative
										B212_f_SC-I-84	A31_Methanosaeta	-0.8039	0.0099	AB	negative
										B2283_o_IMCC26256	A31_Methanosaeta	0.6303	0.0137	AB	positive
										B2335_o_Subgroup 7	A31_Methanosaeta	0.6642	0.0334	AB	positive
										B2337_uncultured	A31_Methanosaeta	0.6743	0.005	AB	positive
										B2795_o_SBR1031	A31_Methanosaeta	0.6541	0.0334	AB	positive
										B3395_uncultured Acidobacterium sp.	A31_Methanosaeta	0.6126	0.0137	AB	positive
										B4205_f_Burkholderiaceae	A31_Methanosaeta	0.6932	0.0137	AB	positive
										B421_uncultured bacterium	A31_Methanosaeta	0.6596	0.005	AB	positive
										B4237_uncultured	A31_Methanosaeta	0.6151	0.0137	AB	positive
										B474_Methylobacter	A31_Methanosaeta	0.6145	0.0334	AB	positive
										B489_f_Gallionellaceae	A31_Methanosaeta	0.6453	0.0235	AB	positive
										B60_uncultured bacterium	A31_Methanosaeta	-0.6518	0.0099	AB	negative
										B689_uncultured bacterium 5G4	A31_Methanosaeta	0.6394	0.0235	AB	positive
										B695_uncultured soil bacterium	A31_Methanosaeta	0.6402	0.005	AB	positive
										B7324_f_0319-6G20	A31_Methanosaeta	0.6232	0.005	AB	positive
										B7421_o_NA	A31_Methanosaeta	0.6225	0.0137	AB	positive
										B768_uncultured proteobacterium	A31_Methanosaeta	0.6582	0.0137	AB	positive
										B806_o_NA	A31_Methanosaeta	0.6064	0.0334	AB	positive
										B988_GOUTB8	A31_Methanosaeta	0.6382	0.0137	AB	positive
										F1793_Schizothecium	A31_Methanosaeta	0.6585	0.0137	AF	positive
										F1818_unidentified	A31_Methanosaeta	0.6026	0.0137	AF	positive
										F2419_Arthrocatena	A31_Methanosaeta	0.6161	0.005	AF	positive
										F25_o_Pleosporales	A31_Methanosaeta	-0.6545	0.0297	AF	negative
										F2838_unidentified	A31_Methanosaeta	0.6693	0.005	AF	positive
										F3142_unidentified	A31_Methanosaeta	0.6365	0.005	AF	positive
										F3221_unidentified	A31_Methanosaeta	0.6143	0.0137	AF	positive
										F338_Trichomerium	A31_Methanosaeta	0.6375	0.005	AF	positive
										F3620_f_Aspergillaceae	A31_Methanosaeta	0.609	0.0137	AF	positive
										F431_unidentified	A31_Methanosaeta	0.6324	0.0137	AF	positive
										F6640_unidentified	A31_Methanosaeta	0.6071	0.0235	AF	positive
										F741_Cladosporium	A31_Methanosaeta	0.6744	0.0137	AF	positive
										F803_o_NA	A31_Methanosaeta	0.6647	0.0235	AF	positive
										F863_o_NA	A31_Methanosaeta	0.6218	0.005	AF	positive
										A49_o_NA	A36_Methanosarcina	-0.604	0.0198	A	negative
										A82_Candidatus Nitrosoarchaeum	A36_Methanosarcina	-0.7194	0.0099	A	negative
										B1_uncultured prokaryote	A36_Methanosarcina	0.6587	0.0198	AB	positive
										B101_o_S085	A36_Methanosarcina	-0.6073	0.0297	AB	negative
										B103_Porphyrobacter	A36_Methanosarcina	0.7391	0.0098	AB	positive
										B106_Oryzihumus	A36_Methanosarcina	-0.6773	0.0297	AB	negative
										B116_Reyranella	A36_Methanosarcina	-0.8602	0.0099	AB	negative
										B1244_uncultured proteobacterium	A36_Methanosarcina	-0.6393	0.0495	AB	negative
										B156_Candidatus Solibacter	A36_Methanosarcina	0.8535	0.0098	AB	positive
										B163_uncultured Bellilinea sp.	A36_Methanosarcina	-0.8479	0.0099	AB	negative
										B168_Sphingomonas	A36_Methanosarcina	-0.7255	0.0099	AB	negative
										B1686_uncultured	A36_Methanosarcina	-0.8707	0.0099	AB	negative
										B193_Sideroxydans	A36_Methanosarcina	-0.7232	0.0396	AB	negative
										B203_uncultured Sorangiineae bacterium	A36_Methanosarcina	-0.6003	0.0495	AB	negative
										B205_uncultured	A36_Methanosarcina	-0.6452	0.0495	AB	negative
										B212_f_SC-I-84	A36_Methanosarcina	-0.6488	0.0297	AB	negative
										B272_uncultured Chlorobi bacterium	A36_Methanosarcina	0.6486	0.0396	AB	positive
										B2747_Cyanothece PCC-8801	A36_Methanosarcina	0.7143	0.0098	AB	positive
										B29_Defluviicoccus	A36_Methanosarcina	-0.6329	0.0297	AB	negative
										B2923_uncultured Sphingobacteriia bacterium	A36_Methanosarcina	0.6515	0.0098	AB	positive
										B306_uncultured	A36_Methanosarcina	0.6562	0.0296	AB	positive
										B51_f_uncultured	A36_Methanosarcina	0.661	0.0396	AB	positive
										B5717_Deferrisoma	A36_Methanosarcina	0.6036	0.0098	AB	positive
										B60_uncultured bacterium	A36_Methanosarcina	-0.6059	0.0495	AB	negative
										B6007_uncultured bacterium	A36_Methanosarcina	0.6601	0.0098	AB	positive
										B688_uncultured Planctomyces sp.	A36_Methanosarcina	0.6209	0.0198	AB	positive
										B711_uncultured prokaryote	A36_Methanosarcina	0.7632	0.0098	AB	positive
										B76_o_NA	A36_Methanosarcina	0.652	0.0198	AB	positive
										B771_o_NA	A36_Methanosarcina	-0.6258	0.0099	AB	negative
										F101_Humicola	A36_Methanosarcina	0.684	0.0198	AF	positive
										F113_Setophoma	A36_Methanosarcina	0.695	0.0198	AF	positive
										F125_o_Leucosporidiales	A36_Methanosarcina	0.7652	0.0099	AF	positive
										F138_Rhizophydium	A36_Methanosarcina	0.6381	0.0495	AF	positive
										F1446_unidentified	A36_Methanosarcina	0.6969	0.0098	AF	positive
										F163_o_NA	A36_Methanosarcina	-0.6683	0.0396	AF	negative
										F165_o_NA	A36_Methanosarcina	0.6317	0.0396	AF	positive
										F1808_Pseudaleuria	A36_Methanosarcina	0.6702	0.0198	AF	positive
										F2180_o_NA	A36_Methanosarcina	0.7073	0.0098	AF	positive
										F2708_o_NA	A36_Methanosarcina	0.766	0.0197	AF	positive
										F3192_unidentified	A36_Methanosarcina	0.6375	0.0297	AF	positive
										F345_o_NA	A36_Methanosarcina	-0.6725	0.0396	AF	negative
										F388_o_NA	A36_Methanosarcina	-0.6413	0.0396	AF	negative
										F5_Schizothecium	A36_Methanosarcina	-0.7015	0.0198	AF	negative
										F57_Saitozyma	A36_Methanosarcina	0.7312	0.0098	AF	positive
										F578_o_NA	A36_Methanosarcina	-0.8751	0.0099	AF	negative
										F691_o_NA	A36_Methanosarcina	0.6131	0.0495	AF	positive
										F73_Cyberlindnera	A36_Methanosarcina	-0.6567	0.0495	AF	negative
										F776_o_Sordariales	A36_Methanosarcina	0.709	0.0098	AF	positive
										F848_Papiliotrema	A36_Methanosarcina	0.6458	0.0197	AF	positive
										A7_f_uncultured	A4_Methanosaeta	0.8429	0.0099	A	positive
										A71_uncultured methanogenic archaeon	A4_Methanosaeta	0.7075	0.0396	A	positive
										A79_uncultured marine crenarchaeote E6-3G	A4_Methanosaeta	0.6851	0.0198	A	positive
										A9_Methanoregula	A4_Methanosaeta	0.6687	0.0495	A	positive
										B1043_uncultured proteobacterium	A4_Methanosaeta	0.6513	0.0198	AB	positive
										B108_uncultured prokaryote	A4_Methanosaeta	-0.76	0.0198	AB	negative
										B115_f_Micrococcaceae	A4_Methanosaeta	0.6504	0.0495	AB	positive
										B124_Massilia	A4_Methanosaeta	-0.6265	0.0495	AB	negative
										B130_uncultured	A4_Methanosaeta	-0.6509	0.0495	AB	negative
										B152_uncultured prokaryote	A4_Methanosaeta	0.6962	0.0198	AB	positive
										B1595_o_Betaproteobacteriales	A4_Methanosaeta	0.6059	0.0495	AB	positive
										B197_uncultured proteobacterium	A4_Methanosaeta	-0.6176	0.0297	AB	negative
										B263_uncultured	A4_Methanosaeta	-0.6288	0.0396	AB	negative
										B304_f_UASB-TL25	A4_Methanosaeta	0.6066	0.0495	AB	positive
										B3624_Candidatus Methylospira	A4_Methanosaeta	0.6346	0.0396	AB	positive
										B385_uncultured	A4_Methanosaeta	-0.7676	0.0099	AB	negative
										B411_o_Betaproteobacteriales	A4_Methanosaeta	-0.6968	0.0297	AB	negative
										B506_uncultured	A4_Methanosaeta	-0.7245	0.0297	AB	negative
										B606_unidentified	A4_Methanosaeta	-0.7848	0.0099	AB	negative
										B69_o_SJA-15	A4_Methanosaeta	0.6788	0.0297	AB	positive
										B693_uncultured bacterium	A4_Methanosaeta	0.6198	0.0099	AB	positive
										B72_Desulfobacca	A4_Methanosaeta	-0.6512	0.0297	AB	negative
										B872_uncultured Pelobacter sp.	A4_Methanosaeta	-0.6067	0.0297	AB	negative
										B887_uncultured	A4_Methanosaeta	0.6335	0.0396	AB	positive
										B958_SWB02	A4_Methanosaeta	0.6049	0.0396	AB	positive
										B962_o_NA	A4_Methanosaeta	0.6213	0.0198	AB	positive
										F106_o_Hypocreales	A4_Methanosaeta	0.7457	0.0297	AF	positive
										F1300_o_NA	A4_Methanosaeta	-0.7601	0.0099	AF	negative
										F1497_unidentified	A4_Methanosaeta	0.7287	0.0099	AF	positive
										F2476_o_NA	A4_Methanosaeta	0.7317	0.0297	AF	positive
										F2561_unidentified	A4_Methanosaeta	0.6135	0.0396	AF	positive
										F2755_unidentified	A4_Methanosaeta	0.6078	0.0495	AF	positive
										F430_o_NA	A4_Methanosaeta	0.8185	0.0297	AF	positive
										F58_unidentified	A4_Methanosaeta	0.6786	0.0396	AF	positive
										F614_unidentified	A4_Methanosaeta	0.6869	0.0198	AF	positive
										F63_o_NA	A4_Methanosaeta	-0.9442	0.0099	AF	negative
										A78_Methanocella	A427_uncultured euryarchaeote	0.7455	0.005	A	positive
										A71_uncultured methanogenic archaeon	A44_Methanosaeta	0.7397	0.0099	A	positive
										A79_uncultured marine crenarchaeote E6-3G	A44_Methanosaeta	0.717	0.0297	A	positive
										B100_Sphingomonas	A44_Methanosaeta	0.6404	0.0099	AB	positive
										B1112_uncultured proteobacterium	A44_Methanosaeta	0.631	0.0495	AB	positive
										B1118_Herminiimonas	A44_Methanosaeta	0.6225	0.0396	AB	positive
										B13_Methylocystis	A44_Methanosaeta	-0.6554	0.0396	AB	negative
										B132_uncultured bacterium	A44_Methanosaeta	-0.6413	0.0396	AB	negative
										B169_Cryobacterium	A44_Methanosaeta	-0.8951	0.0099	AB	negative
										B186_Cryobacterium	A44_Methanosaeta	0.8606	0.0099	AB	positive
										B22_uncultured bacterium	A44_Methanosaeta	-0.7017	0.0099	AB	negative
										B2709_o_NA	A44_Methanosaeta	0.6473	0.0198	AB	positive
										B2964_uncultured	A44_Methanosaeta	0.6014	0.0396	AB	positive
										B30_Sphingomonas	A44_Methanosaeta	-0.7516	0.0297	AB	negative
										B547_ADurb.Bin063-1	A44_Methanosaeta	0.6478	0.0396	AB	positive
										B645_uncultured Chloroflexi bacterium	A44_Methanosaeta	0.826	0.0099	AB	positive
										B67_uncultured	A44_Methanosaeta	-0.7352	0.0099	AB	negative
										B710_Arenimonas	A44_Methanosaeta	0.6359	0.0099	AB	positive
										B754_MND1	A44_Methanosaeta	0.6283	0.0297	AB	positive
										B986_uncultured bacterium	A44_Methanosaeta	0.6606	0.0099	AB	positive
										F106_o_Hypocreales	A44_Methanosaeta	0.7639	0.0099	AF	positive
										F112_o_NA	A44_Methanosaeta	0.7159	0.0297	AF	positive
										F21_Schizothecium	A44_Methanosaeta	0.6509	0.0099	AF	positive
										F2939_unidentified	A44_Methanosaeta	0.6315	0.0396	AF	positive
										F3252_o_NA	A44_Methanosaeta	0.6157	0.0198	AF	positive
										F430_o_NA	A44_Methanosaeta	0.6558	0.0396	AF	positive
										B134_Pseudolabrys	A46_Methanosaeta	0.8639	0.0198	AB	positive
										B139_uncultured Iamiaceae bacterium	A46_Methanosaeta	0.6106	0.0396	AB	positive
										B18_f_Intrasporangiaceae	A46_Methanosaeta	0.7095	0.0198	AB	positive
										B202_Ignavibacterium	A46_Methanosaeta	-0.7417	0.0198	AB	negative
										B220_Flavisolibacter	A46_Methanosaeta	0.7196	0.0198	AB	positive
										B2660_Pajaroellobacter	A46_Methanosaeta	0.6485	0.0297	AB	positive
										B31_metagenome	A46_Methanosaeta	0.7688	0.0198	AB	positive
										B3269_uncultured Caldilineaceae bacterium	A46_Methanosaeta	0.7864	0.0099	AB	positive
										B379_Devosia	A46_Methanosaeta	0.6656	0.0297	AB	positive
										B459_uncultured Bellilinea sp.	A46_Methanosaeta	0.6107	0.0297	AB	positive
										B49_uncultured prokaryote	A46_Methanosaeta	-0.6114	0.0297	AB	negative
										B580_Aetherobacter	A46_Methanosaeta	-0.6001	0.0495	AB	negative
										B615_Desulfomonile	A46_Methanosaeta	0.6118	0.0297	AB	positive
										B64_uncultured bacterium 213	A46_Methanosaeta	0.6453	0.0099	AB	positive
										B668_o_NA	A46_Methanosaeta	-0.6366	0.0297	AB	negative
										B673_Jatrophihabitans	A46_Methanosaeta	0.694	0.0297	AB	positive
										B75_Gemmatimonas	A46_Methanosaeta	0.6522	0.0396	AB	positive
										B93_uncultured	A46_Methanosaeta	0.8863	0.0297	AB	positive
										B980_o_NA	A46_Methanosaeta	0.6464	0.0495	AB	positive
										F1396_unidentified	A46_Methanosaeta	0.8215	0.0099	AF	positive
										F1589_unidentified	A46_Methanosaeta	0.7292	0.0099	AF	positive
										F1661_unidentified	A46_Methanosaeta	0.6475	0.0297	AF	positive
										F2025_unidentified	A46_Methanosaeta	0.638	0.0198	AF	positive
										F210_Westerdykella	A46_Methanosaeta	-0.7011	0.0396	AF	negative
										F256_unidentified	A46_Methanosaeta	0.8412	0.0099	AF	positive
										F271_unidentified	A46_Methanosaeta	-0.6556	0.0297	AF	negative
										F2766_unidentified	A46_Methanosaeta	0.6012	0.0396	AF	positive
										F72_o_NA	A46_Methanosaeta	-0.6105	0.0495	AF	negative
										F835_Scedosporium	A46_Methanosaeta	-0.707	0.0396	AF	negative
										F882_Ganoderma	A46_Methanosaeta	0.6021	0.0495	AF	positive
										B128_Syntrophorhabdus	A47_Methanobacterium	-0.7314	0.0099	AB	negative
										B136_f_SC-I-84	A47_Methanobacterium	-0.7484	0.0099	AB	negative
										B1368_Sh765B-TzT-35	A47_Methanobacterium	0.6102	0.0137	AB	positive
										B1775_Acidobacteria bacterium WX27	A47_Methanobacterium	0.6395	0.0137	AB	positive
										B1873_o_NA	A47_Methanobacterium	0.6427	0.0137	AB	positive
										B210_Candidatus Solibacter	A47_Methanobacterium	0.6492	0.0137	AB	positive
										B2355_uncultured bacterium 259	A47_Methanobacterium	0.6203	0.0137	AB	positive
										B311_f_SC-I-84	A47_Methanobacterium	0.6302	0.0137	AB	positive
										B434_Bryobacter	A47_Methanobacterium	0.6088	0.0137	AB	positive
										B623_uncultured Prosthecobacter sp.	A47_Methanobacterium	0.6474	0.0137	AB	positive
										F120_o_NA	A47_Methanobacterium	-0.6011	0.0297	AF	negative
										F136_Spirosphaera	A47_Methanobacterium	-0.7334	0.0198	AF	negative
										F224_Phaeoisaria	A47_Methanobacterium	0.6005	0.0297	AF	positive
										F232_Entoloma	A47_Methanobacterium	0.7156	0.0334	AF	positive
										F3368_unidentified	A47_Methanobacterium	0.6215	0.005	AF	positive
										F37_o_Hypocreales	A47_Methanobacterium	-0.6277	0.0396	AF	negative
										F70_Mortierella	A47_Methanobacterium	-0.6992	0.0495	AF	negative
										F8_unidentified	A47_Methanobacterium	0.6505	0.0396	AF	positive
										A55_Methanosarcina	A50_Candidatus Methanoperedens	0.7722	0.005	A	positive
										A63_Methanosarcina	A53_uncultured euryarchaeote	0.7337	0.0137	A	positive
										B1238_o_NA	A55_Methanosarcina	0.7488	0.005	AB	positive
										B1328_uncultured	A55_Methanosarcina	0.6796	0.005	AB	positive
										B1359_uncultured	A55_Methanosarcina	0.6375	0.0334	AB	positive
										B1514_f_Pedosphaeraceae	A55_Methanosarcina	0.6475	0.0137	AB	positive
										B1730_uncultured	A55_Methanosarcina	0.6207	0.0235	AB	positive
										B1758_f_Archangiaceae	A55_Methanosarcina	0.6331	0.0235	AB	positive
										B1812_uncultured soil bacterium	A55_Methanosarcina	0.6655	0.0137	AB	positive
										B1884_uncultured soil bacterium	A55_Methanosarcina	0.6373	0.005	AB	positive
										B2014_uncultured Acidimicrobidae bacterium	A55_Methanosarcina	0.7085	0.005	AB	positive
										B2057_Candidatus Solibacter	A55_Methanosarcina	0.7363	0.005	AB	positive
										B219_uncultured Desulfuromonadales bacterium	A55_Methanosarcina	-0.6174	0.0099	AB	negative
										B244_o_NA	A55_Methanosarcina	-0.8295	0.0099	AB	negative
										B2470_Dactylosporangium	A55_Methanosarcina	0.6444	0.0137	AB	positive
										B271_Anaerolinea	A55_Methanosarcina	-0.8224	0.0198	AB	negative
										B2842_Haliangium	A55_Methanosarcina	0.7188	0.0137	AB	positive
										B293_o_NA	A55_Methanosarcina	0.7358	0.0235	AB	positive
										B329_Luteimonas	A55_Methanosarcina	0.603	0.0091	AB	positive
										B348_f_Burkholderiaceae	A55_Methanosarcina	0.7197	0.005	AB	positive
										B3706_Mycobacterium	A55_Methanosarcina	0.6724	0.0137	AB	positive
										B4023_Geobacter	A55_Methanosarcina	0.6324	0.005	AB	positive
										B4169_Sideroxydans	A55_Methanosarcina	0.7164	0.005	AB	positive
										B433_Syntrophobacter	A55_Methanosarcina	0.7525	0.005	AB	positive
										B4559_o_NA	A55_Methanosarcina	0.6504	0.0235	AB	positive
										B456_uncultured bacterium 213	A55_Methanosarcina	0.7507	0.0235	AB	positive
										B4623_Bacillus	A55_Methanosarcina	0.6783	0.0137	AB	positive
										B483_o_Subgroup 7	A55_Methanosarcina	0.6862	0.0235	AB	positive
										B4863_uncultured Gemmatimonadetes bacterium	A55_Methanosarcina	0.6025	0.005	AB	positive
										B5775_Subgroup 10	A55_Methanosarcina	0.6355	0.0137	AB	positive
										B7176_f_0319-6G20	A55_Methanosarcina	0.6038	0.0137	AB	positive
										B77_Candidatus Nitrotoga	A55_Methanosarcina	0.7034	0.0137	AB	positive
										B8_Luteimonas	A55_Methanosarcina	-0.8589	0.0297	AB	negative
										B921_o_Bacillales	A55_Methanosarcina	-0.825	0.0099	AB	negative
										F10_Mrakia	A55_Methanosarcina	0.7492	0.0198	AF	positive
										F1080_unidentified	A55_Methanosarcina	0.6129	0.0137	AF	positive
										F110_unidentified	A55_Methanosarcina	0.8407	0.0099	AF	positive
										F1214_o_NA	A55_Methanosarcina	0.6669	0.005	AF	positive
										F209_o_NA	A55_Methanosarcina	-0.6963	0.0198	AF	negative
										F213_Mrakiella	A55_Methanosarcina	0.6527	0.0297	AF	positive
										F216_o_NA	A55_Methanosarcina	0.6271	0.0297	AF	positive
										F2252_unidentified	A55_Methanosarcina	0.6174	0.0137	AF	positive
										F235_f_Didymellaceae	A55_Methanosarcina	-0.6447	0.0198	AF	negative
										F2704_o_Cystofilobasidiales	A55_Methanosarcina	0.7105	0.0137	AF	positive
										F2954_o_NA	A55_Methanosarcina	0.7256	0.005	AF	positive
										F317_o_NA	A55_Methanosarcina	0.6728	0.0396	AF	positive
										F3794_unidentified	A55_Methanosarcina	0.6753	0.0235	AF	positive
										F4_Pseudeurotium	A55_Methanosarcina	0.7894	0.0099	AF	positive
										F443_unidentified	A55_Methanosarcina	-0.612	0.0198	AF	negative
										F4590_unidentified	A55_Methanosarcina	0.6293	0.005	AF	positive
										F529_o_NA	A55_Methanosarcina	0.7537	0.005	AF	positive
										F580_unidentified	A55_Methanosarcina	0.6013	0.019	AF	positive
										A78_Methanocella	A6_Candidatus Methanoperedens	0.6056	0.0198	A	positive
										A782_uncultured archaeon	A61_Methanosaeta	0.612	0.0137	A	positive
										A8_Methanobacterium	A61_Methanosaeta	-0.8602	0.0297	A	negative
										B1019_uncultured Cytophagales bacterium	A61_Methanosaeta	0.6341	0.005	AB	positive
										B1095_Candidatus Solibacter	A61_Methanosaeta	0.6663	0.0235	AB	positive
										B1286_Dokdonella	A61_Methanosaeta	0.6361	0.005	AB	positive
										B1300_uncultured archaeon	A61_Methanosaeta	0.6461	0.0137	AB	positive
										B157_o_RBG-13-54-9	A61_Methanosaeta	-0.7975	0.0198	AB	negative
										B167_o_NA	A61_Methanosaeta	0.7329	0.005	AB	positive
										B1766_f_Burkholderiaceae	A61_Methanosaeta	0.6127	0.005	AB	positive
										B1947_o_Betaproteobacteriales	A61_Methanosaeta	0.7108	0.005	AB	positive
										B1996_f_Burkholderiaceae	A61_Methanosaeta	0.6896	0.0235	AB	positive
										B238_f_uncultured	A61_Methanosaeta	0.728	0.0137	AB	positive
										B2692_Gaiella	A61_Methanosaeta	0.6943	0.0137	AB	positive
										B2738_Clostridium sensu stricto 6	A61_Methanosaeta	0.6918	0.005	AB	positive
										B277_Desulfatiglans	A61_Methanosaeta	-0.8237	0.0198	AB	negative
										B292_f_BSV26	A61_Methanosaeta	-0.754	0.0297	AB	negative
										B3105_uncultured bacterium	A61_Methanosaeta	0.631	0.0137	AB	positive
										B3383_f_Ruminococcaceae	A61_Methanosaeta	0.6576	0.005	AB	positive
										B3561_Solirubrobacter	A61_Methanosaeta	0.6253	0.0334	AB	positive
										B3828_f_0319-6G20	A61_Methanosaeta	0.6467	0.0137	AB	positive
										B4033_uncultured	A61_Methanosaeta	0.6851	0.0137	AB	positive
										B4252_uncultured soil bacterium	A61_Methanosaeta	0.6577	0.005	AB	positive
										B4387_o_Microtrichales	A61_Methanosaeta	0.6949	0.0334	AB	positive
										B5072_o_NA	A61_Methanosaeta	0.6527	0.0235	AB	positive
										B512_uncultured bacterium	A61_Methanosaeta	0.6496	0.0289	AB	positive
										B561_Jatrophihabitans	A61_Methanosaeta	0.6988	0.0137	AB	positive
										B57_Conexibacter	A61_Methanosaeta	-0.8363	0.0297	AB	negative
										B6076_uncultured soil bacterium	A61_Methanosaeta	0.6883	0.005	AB	positive
										B6130_uncultured Prosthecobacter sp.	A61_Methanosaeta	0.6629	0.0334	AB	positive
										B62_Mycobacterium	A61_Methanosaeta	0.6251	0.0198	AB	positive
										B6577_uncultured Desulfovibrionales bacterium	A61_Methanosaeta	0.6357	0.005	AB	positive
										B719_Conexibacter	A61_Methanosaeta	0.6018	0.0235	AB	positive
										B755_AKIW659	A61_Methanosaeta	0.6523	0.0433	AB	positive
										B8105_Desulfatiglans	A61_Methanosaeta	0.6494	0.005	AB	positive
										B82_ADurb.Bin063-1	A61_Methanosaeta	0.6684	0.0235	AB	positive
										B826_f_BSV26	A61_Methanosaeta	0.6619	0.005	AB	positive
										B8794_uncultured bacterium	A61_Methanosaeta	0.6448	0.0137	AB	positive
										B8807_Ammoniphilus	A61_Methanosaeta	0.6463	0.0334	AB	positive
										B9093_Novosphingobium	A61_Methanosaeta	0.6068	0.0137	AB	positive
										B94_f_Micropepsaceae	A61_Methanosaeta	-0.6068	0.0495	AB	negative
										F1050_Hannaella	A61_Methanosaeta	0.6598	0.0334	AF	positive
										F118_Peziza	A61_Methanosaeta	0.694	0.0388	AF	positive
										F1296_o_NA	A61_Methanosaeta	0.6069	0.0137	AF	positive
										F1305_o_NA	A61_Methanosaeta	0.6728	0.0137	AF	positive
										F158_o_NA	A61_Methanosaeta	0.6235	0.0495	AF	positive
										F1786_unidentified	A61_Methanosaeta	0.6466	0.0235	AF	positive
										F2060_o_NA	A61_Methanosaeta	0.6387	0.005	AF	positive
										F254_Articulospora	A61_Methanosaeta	0.6108	0.0289	AF	positive
										F258_o_NA	A61_Methanosaeta	0.6423	0.0091	AF	positive
										F320_unidentified	A61_Methanosaeta	-0.6491	0.0198	AF	negative
										F39_Mrakiella	A61_Methanosaeta	-0.8029	0.0198	AF	negative
										F411_unidentified	A61_Methanosaeta	0.6292	0.019	AF	positive
										F60_Sordaria	A61_Methanosaeta	0.6587	0.005	AF	positive
										F604_o_NA	A61_Methanosaeta	0.6626	0.005	AF	positive
										F608_Mortierella	A61_Methanosaeta	0.6998	0.0137	AF	positive
										F752_Scutellinia	A61_Methanosaeta	0.7221	0.0137	AF	positive
										F940_o_NA	A61_Methanosaeta	0.7116	0.005	AF	positive
										B1_uncultured prokaryote	A63_Methanosarcina	0.6562	0.0396	AB	positive
										B101_o_S085	A63_Methanosarcina	-0.8315	0.0396	AB	negative
										B1054_uncultured Bellilinea sp.	A63_Methanosarcina	0.6516	0.0137	AB	positive
										B106_Oryzihumus	A63_Methanosarcina	-0.8072	0.0297	AB	negative
										B1106_uncultured	A63_Methanosarcina	0.6428	0.0334	AB	positive
										B179_Haliangium	A63_Methanosarcina	0.7408	0.0137	AB	positive
										B1790_uncultured bacterium	A63_Methanosarcina	0.6096	0.005	AB	positive
										B193_Sideroxydans	A63_Methanosarcina	-0.7791	0.0297	AB	negative
										B203_uncultured Sorangiineae bacterium	A63_Methanosarcina	-0.8527	0.0198	AB	negative
										B212_f_SC-I-84	A63_Methanosarcina	-0.8518	0.0198	AB	negative
										B2283_o_IMCC26256	A63_Methanosarcina	0.6516	0.0235	AB	positive
										B2335_o_Subgroup 7	A63_Methanosarcina	0.6609	0.005	AB	positive
										B2337_uncultured	A63_Methanosarcina	0.6365	0.0334	AB	positive
										B3395_uncultured Acidobacterium sp.	A63_Methanosarcina	0.6811	0.0235	AB	positive
										B388_Anaeromyxobacter	A63_Methanosarcina	0.6356	0.005	AB	positive
										B4205_f_Burkholderiaceae	A63_Methanosarcina	0.6902	0.005	AB	positive
										B421_uncultured bacterium	A63_Methanosarcina	0.636	0.0137	AB	positive
										B4237_uncultured	A63_Methanosarcina	0.6528	0.005	AB	positive
										B474_Methylobacter	A63_Methanosarcina	0.6658	0.0137	AB	positive
										B489_f_Gallionellaceae	A63_Methanosarcina	0.6895	0.005	AB	positive
										B519_uncultured	A63_Methanosarcina	0.6091	0.0334	AB	positive
										B60_uncultured bacterium	A63_Methanosarcina	-0.6429	0.0495	AB	negative
										B61_Ellin6067	A63_Methanosarcina	-0.6272	0.0495	AB	negative
										B6919_uncultured eubacterium WCHB1-50	A63_Methanosarcina	0.6554	0.0235	AB	positive
										B695_uncultured soil bacterium	A63_Methanosarcina	0.6185	0.0235	AB	positive
										B7421_o_NA	A63_Methanosarcina	0.6067	0.0137	AB	positive
										B768_uncultured proteobacterium	A63_Methanosarcina	0.7134	0.0137	AB	positive
										B7693_f_WD2101 soil group	A63_Methanosarcina	0.6196	0.005	AB	positive
										B854_uncultured	A63_Methanosarcina	0.6268	0.0137	AB	positive
										B8918_Conexibacter	A63_Methanosarcina	0.6552	0.005	AB	positive
										B9591_Armatimonadetes bacterium 55-13	A63_Methanosarcina	0.6137	0.0137	AB	positive
										B988_GOUTB8	A63_Methanosarcina	0.6778	0.005	AB	positive
										F1326_o_NA	A63_Methanosarcina	0.6167	0.0137	AF	positive
										F1689_unidentified	A63_Methanosarcina	0.6101	0.0235	AF	positive
										F1793_Schizothecium	A63_Methanosarcina	0.6869	0.005	AF	positive
										F2419_Arthrocatena	A63_Methanosarcina	0.6597	0.0137	AF	positive
										F25_o_Pleosporales	A63_Methanosarcina	-0.6965	0.0297	AF	negative
										F2838_unidentified	A63_Methanosarcina	0.6444	0.0235	AF	positive
										F3142_unidentified	A63_Methanosarcina	0.6586	0.0235	AF	positive
										F3221_unidentified	A63_Methanosarcina	0.6738	0.0137	AF	positive
										F431_unidentified	A63_Methanosarcina	0.6785	0.0137	AF	positive
										F741_Cladosporium	A63_Methanosarcina	0.6751	0.005	AF	positive
										F750_unidentified	A63_Methanosarcina	0.6393	0.0235	AF	positive
										F774_unidentified	A63_Methanosarcina	0.6642	0.0137	AF	positive
										F803_o_NA	A63_Methanosarcina	0.7044	0.0137	AF	positive
										F863_o_NA	A63_Methanosarcina	0.6534	0.0137	AF	positive
										B11_f_SC-I-84	A66_Methanosaeta	0.6705	0.0099	AB	positive
										B1208_o_OPB41	A66_Methanosaeta	0.6145	0.0297	AB	positive
										B280_Hyphomicrobium	A66_Methanosaeta	0.6009	0.0396	AB	positive
										B343_uncultured	A66_Methanosaeta	0.6646	0.0297	AB	positive
										B445_uncultured Archangiaceae bacterium	A66_Methanosaeta	0.7194	0.0396	AB	positive
										B463_ADurb.Bin063-1	A66_Methanosaeta	0.6018	0.0495	AB	positive
										B481_Desulfomonile	A66_Methanosaeta	0.6224	0.0396	AB	positive
										B513_Gemmatimonas	A66_Methanosaeta	0.6207	0.0198	AB	positive
										B613_o_uncultured	A66_Methanosaeta	0.6217	0.0396	AB	positive
										F1019_unidentified	A66_Methanosaeta	-0.8328	0.0099	AF	negative
										F132_unidentified	A66_Methanosaeta	-0.7046	0.0198	AF	negative
										F1589_unidentified	A66_Methanosaeta	-0.6017	0.0396	AF	negative
										F2158_o_NA	A66_Methanosaeta	0.629	0.0198	AF	positive
										F254_Articulospora	A66_Methanosaeta	0.6439	0.0198	AF	positive
										F258_o_NA	A66_Methanosaeta	0.6691	0.0396	AF	positive
										F2715_o_Sordariales	A66_Methanosaeta	0.6001	0.0495	AF	positive
										F457_o_NA	A66_Methanosaeta	-0.6444	0.0495	AF	negative
										F678_unidentified	A66_Methanosaeta	0.625	0.0495	AF	positive
										A78_Methanocella	A717_uncultured archaeon	0.6896	0.0137	A	positive
										A98_uncultured archaeon	A78_Methanocella	0.7058	0.0235	A	positive
										B1004_ADurb.Bin063-1	A78_Methanocella	0.7217	0.0137	AB	positive
										B1020_uncultured forest soil bacterium	A78_Methanocella	0.6538	0.0137	AB	positive
										B1105_uncultured bacterium	A78_Methanocella	0.623	0.005	AB	positive
										B1195_f_Archangiaceae	A78_Methanocella	0.6016	0.0137	AB	positive
										B1215_uncultured	A78_Methanocella	0.6744	0.005	AB	positive
										B1255_uncultured	A78_Methanocella	-0.7779	0.0099	AB	negative
										B1439_uncultured	A78_Methanocella	0.6347	0.0137	AB	positive
										B1673_uncultured	A78_Methanocella	0.6312	0.0137	AB	positive
										B1953_o_RBG-13-54-9	A78_Methanocella	0.6318	0.005	AB	positive
										B2135_Clostridium sensu stricto 12	A78_Methanocella	0.6015	0.005	AB	positive
										B2197_o_Frankiales	A78_Methanocella	0.6667	0.0334	AB	positive
										B2440_o_Bacillales	A78_Methanocella	0.6213	0.005	AB	positive
										B2503_f_Ruminococcaceae	A78_Methanocella	0.7027	0.005	AB	positive
										B2588_f_uncultured	A78_Methanocella	0.7013	0.0334	AB	positive
										B3013_Anaerolinea	A78_Methanocella	0.6562	0.0137	AB	positive
										B3041_f_Acidobacteriaceae (Subgroup 1)	A78_Methanocella	0.6001	0.005	AB	positive
										B3154_uncultured	A78_Methanocella	0.6629	0.0235	AB	positive
										B319_Pseudomonas	A78_Methanocella	0.6158	0.0334	AB	positive
										B3242_uncultured bacterium	A78_Methanocella	0.6776	0.0235	AB	positive
										B3297_uncultured Prosthecobacter sp.	A78_Methanocella	0.7045	0.005	AB	positive
										B36_o_Sva0485	A78_Methanocella	-0.8287	0.0396	AB	negative
										B3766_o_NA	A78_Methanocella	0.6185	0.0137	AB	positive
										B394_o_MBNT15	A78_Methanocella	0.668	0.0235	AB	positive
										B3997_uncultured Conexibacteraceae bacterium	A78_Methanocella	0.6211	0.0334	AB	positive
										B4168_f_0319-6G20	A78_Methanocella	0.6726	0.0137	AB	positive
										B4210_Candidatus Competibacter	A78_Methanocella	0.6742	0.005	AB	positive
										B493_o_uncultured	A78_Methanocella	-0.818	0.0297	AB	negative
										B4956_uncultured proteobacterium	A78_Methanocella	0.6491	0.005	AB	positive
										B509_o_Myxococcales	A78_Methanocella	0.6859	0.0137	AB	positive
										B524_o_RBG-13-54-9	A78_Methanocella	0.6672	0.005	AB	positive
										B525_Ferruginibacter	A78_Methanocella	0.6601	0.005	AB	positive
										B5308_uncultured Acidobacterium sp.	A78_Methanocella	0.6415	0.0137	AB	positive
										B5480_Pedosphaera	A78_Methanocella	0.6125	0.0137	AB	positive
										B6038_o_NA	A78_Methanocella	0.64	0.0235	AB	positive
										B6106_uncultured bacterium	A78_Methanocella	0.6096	0.005	AB	positive
										B630_Candidatus Solibacter	A78_Methanocella	0.6697	0.0235	AB	positive
										B639_uncultured prokaryote	A78_Methanocella	0.7245	0.005	AB	positive
										B6713_Actinoplanes	A78_Methanocella	0.6898	0.005	AB	positive
										B691_o_Microtrichales	A78_Methanocella	0.6342	0.019	AB	positive
										B7783_Hydrogenispora	A78_Methanocella	0.6428	0.005	AB	positive
										B85_o_Subgroup 7	A78_Methanocella	0.7522	0.0198	AB	positive
										B856_uncultured	A78_Methanocella	0.7147	0.005	AB	positive
										F1014_Trichomerium	A78_Methanocella	0.6724	0.0137	AF	positive
										F137_o_NA	A78_Methanocella	-0.6863	0.0495	AF	negative
										F140_o_NA	A78_Methanocella	-0.7461	0.0099	AF	negative
										F142_Mortierella	A78_Methanocella	-0.6625	0.0396	AF	negative
										F145_o_NA	A78_Methanocella	0.6727	0.005	AF	positive
										F148_unidentified	A78_Methanocella	0.8053	0.0297	AF	positive
										F149_Slooffia	A78_Methanocella	-0.7867	0.0297	AF	negative
										F1638_unidentified	A78_Methanocella	0.7117	0.005	AF	positive
										F1803_o_NA	A78_Methanocella	0.6338	0.005	AF	positive
										F200_Rhizoctonia	A78_Methanocella	0.781	0.005	AF	positive
										F2128_o_NA	A78_Methanocella	0.6769	0.005	AF	positive
										F261_Paraphoma	A78_Methanocella	0.7768	0.005	AF	positive
										F2966_unidentified	A78_Methanocella	0.7264	0.0137	AF	positive
										F3030_unidentified	A78_Methanocella	0.7038	0.0137	AF	positive
										F335_unidentified	A78_Methanocella	-0.8305	0.0099	AF	negative
										F4468_unidentified	A78_Methanocella	0.6463	0.0137	AF	positive
										F454_Scedosporium	A78_Methanocella	-0.6063	0.0297	AF	negative
										F557_Paraphoma	A78_Methanocella	0.691	0.0334	AF	positive
										F676_unidentified	A78_Methanocella	0.7463	0.0137	AF	positive
										F827_unidentified	A78_Methanocella	0.7185	0.0235	AF	positive
										F83_o_NA	A78_Methanocella	-0.8203	0.0396	AF	negative
										F866_unidentified	A78_Methanocella	0.6262	0.0235	AF	positive
										F90_unidentified	A78_Methanocella	-0.6312	0.0297	AF	negative
										F93_o_NA	A78_Methanocella	-0.7082	0.0099	AF	negative
										A8_Methanobacterium	A782_uncultured archaeon	-0.6745	0.0297	A	negative
										A9_Methanoregula	A8_Methanobacterium	0.6523	0.0297	A	positive
										B1019_uncultured Cytophagales bacterium	A8_Methanobacterium	-0.6863	0.0198	AB	negative
										B1095_Candidatus Solibacter	A8_Methanobacterium	-0.78	0.0099	AB	negative
										B10992_f_Pedosphaeraceae	A8_Methanobacterium	-0.6235	0.0297	AB	negative
										B1100_uncultured bacterium	A8_Methanobacterium	-0.6558	0.0396	AB	negative
										B1208_o_OPB41	A8_Methanobacterium	-0.6158	0.0198	AB	negative
										B1221_wastewater metagenome	A8_Methanobacterium	-0.6096	0.0396	AB	negative
										B1286_Dokdonella	A8_Methanobacterium	-0.7208	0.0198	AB	negative
										B1300_uncultured archaeon	A8_Methanobacterium	-0.689	0.0099	AB	negative
										B157_o_RBG-13-54-9	A8_Methanobacterium	0.8878	0.0198	AB	positive
										B1617_bacterium Ellin6543	A8_Methanobacterium	-0.6036	0.0198	AB	negative
										B167_o_NA	A8_Methanobacterium	-0.8388	0.0099	AB	negative
										B1681_metagenome	A8_Methanobacterium	-0.626	0.0198	AB	negative
										B1766_f_Burkholderiaceae	A8_Methanobacterium	-0.7025	0.0099	AB	negative
										B1788_Candidatus Nitrotoga	A8_Methanobacterium	-0.6382	0.0495	AB	negative
										B1947_o_Betaproteobacteriales	A8_Methanobacterium	-0.7668	0.0495	AB	negative
										B1996_f_Burkholderiaceae	A8_Methanobacterium	-0.7579	0.0198	AB	negative
										B2006_f_Burkholderiaceae	A8_Methanobacterium	-0.6155	0.0495	AB	negative
										B2181_Ellin6067	A8_Methanobacterium	-0.6384	0.0198	AB	negative
										B2278_Methylobacter	A8_Methanobacterium	-0.6474	0.0495	AB	negative
										B238_f_uncultured	A8_Methanobacterium	-0.7797	0.0198	AB	negative
										B2498_Sorangium	A8_Methanobacterium	-0.73	0.0198	AB	negative
										B2692_Gaiella	A8_Methanobacterium	-0.7631	0.0396	AB	negative
										B2738_Clostridium sensu stricto 6	A8_Methanobacterium	-0.7268	0.0198	AB	negative
										B277_Desulfatiglans	A8_Methanobacterium	0.9437	0.0099	AB	positive
										B278_f_Burkholderiaceae	A8_Methanobacterium	0.7278	0.0495	AB	positive
										B292_f_BSV26	A8_Methanobacterium	0.9178	0.0099	AB	positive
										B3044_uncultured Desulfovibrio sp.	A8_Methanobacterium	-0.6609	0.0297	AB	negative
										B3105_uncultured bacterium	A8_Methanobacterium	-0.6802	0.0198	AB	negative
										B3163_o_MBNT15	A8_Methanobacterium	-0.6272	0.0297	AB	negative
										B3293_f_67-14	A8_Methanobacterium	-0.6541	0.0198	AB	negative
										B3383_f_Ruminococcaceae	A8_Methanobacterium	-0.7502	0.0198	AB	negative
										B3561_Solirubrobacter	A8_Methanobacterium	-0.734	0.0099	AB	negative
										B3657_f_Fimbriimonadaceae	A8_Methanobacterium	-0.6304	0.0198	AB	negative
										B3821_uncultured bacterium	A8_Methanobacterium	-0.6983	0.0495	AB	negative
										B3828_f_0319-6G20	A8_Methanobacterium	-0.6892	0.0198	AB	negative
										B3833_uncultured bacterium	A8_Methanobacterium	-0.663	0.0396	AB	negative
										B4033_uncultured	A8_Methanobacterium	-0.7538	0.0198	AB	negative
										B4252_uncultured soil bacterium	A8_Methanobacterium	-0.6942	0.0297	AB	negative
										B4387_o_Microtrichales	A8_Methanobacterium	-0.7701	0.0099	AB	negative
										B4405_uncultured Acidobacteriales bacterium	A8_Methanobacterium	-0.6908	0.0297	AB	negative
										B4871_o_NA	A8_Methanobacterium	-0.6081	0.0198	AB	negative
										B5072_o_NA	A8_Methanobacterium	-0.7741	0.0099	AB	negative
										B512_uncultured bacterium	A8_Methanobacterium	-0.7295	0.0198	AB	negative
										B561_Jatrophihabitans	A8_Methanobacterium	-0.7409	0.0198	AB	negative
										B57_Conexibacter	A8_Methanobacterium	0.9429	0.0099	AB	positive
										B613_o_uncultured	A8_Methanobacterium	-0.6115	0.0396	AB	negative
										B6130_uncultured Prosthecobacter sp.	A8_Methanobacterium	-0.7382	0.0099	AB	negative
										B619_o_NA	A8_Methanobacterium	-0.6222	0.0297	AB	negative
										B62_Mycobacterium	A8_Methanobacterium	-0.6922	0.0297	AB	negative
										B6577_uncultured Desulfovibrionales bacterium	A8_Methanobacterium	-0.6608	0.0198	AB	negative
										B719_Conexibacter	A8_Methanobacterium	-0.634	0.0099	AB	negative
										B7276_uncultured	A8_Methanobacterium	-0.6743	0.0099	AB	negative
										B7289_uncultured planctomycete	A8_Methanobacterium	-0.6095	0.0198	AB	negative
										B755_AKIW659	A8_Methanobacterium	-0.7635	0.0297	AB	negative
										B7621_CL500-29 marine group	A8_Methanobacterium	-0.6364	0.0495	AB	negative
										B8105_Desulfatiglans	A8_Methanobacterium	-0.6686	0.0198	AB	negative
										B82_ADurb.Bin063-1	A8_Methanobacterium	-0.7781	0.0297	AB	negative
										B826_f_BSV26	A8_Methanobacterium	-0.7421	0.0099	AB	negative
										B8729_f_Parachlamydiaceae	A8_Methanobacterium	-0.6259	0.0198	AB	negative
										B8794_uncultured bacterium	A8_Methanobacterium	-0.6366	0.0198	AB	negative
										B8807_Ammoniphilus	A8_Methanobacterium	-0.642	0.0198	AB	negative
										B907_uncultured bacterium	A8_Methanobacterium	-0.6414	0.0198	AB	negative
										B9093_Novosphingobium	A8_Methanobacterium	-0.6604	0.0198	AB	negative
										B939_Rhodoferax	A8_Methanobacterium	-0.7075	0.0099	AB	negative
										B94_f_Micropepsaceae	A8_Methanobacterium	0.7247	0.0297	AB	positive
										F1050_Hannaella	A8_Methanobacterium	-0.6842	0.0198	AF	negative
										F1138_o_NA	A8_Methanobacterium	-0.6128	0.0297	AF	negative
										F118_Peziza	A8_Methanobacterium	-0.7819	0.0297	AF	negative
										F1296_o_NA	A8_Methanobacterium	-0.7128	0.0099	AF	negative
										F1305_o_NA	A8_Methanobacterium	-0.8024	0.0297	AF	negative
										F158_o_NA	A8_Methanobacterium	-0.704	0.0495	AF	negative
										F1588_unidentified	A8_Methanobacterium	-0.6534	0.0297	AF	negative
										F1703_unidentified	A8_Methanobacterium	-0.6321	0.0198	AF	negative
										F1786_unidentified	A8_Methanobacterium	-0.7222	0.0396	AF	negative
										F2060_o_NA	A8_Methanobacterium	-0.7296	0.0198	AF	negative
										F214_o_NA	A8_Methanobacterium	-0.6557	0.0396	AF	negative
										F254_Articulospora	A8_Methanobacterium	-0.6859	0.0198	AF	negative
										F258_o_NA	A8_Methanobacterium	-0.7407	0.0396	AF	negative
										F2635_o_NA	A8_Methanobacterium	-0.6736	0.0396	AF	negative
										F2715_o_Sordariales	A8_Methanobacterium	-0.6632	0.0099	AF	negative
										F320_unidentified	A8_Methanobacterium	0.7461	0.0396	AF	positive
										F3467_o_NA	A8_Methanobacterium	-0.6918	0.0198	AF	negative
										F39_Mrakiella	A8_Methanobacterium	0.9175	0.0297	AF	positive
										F411_unidentified	A8_Methanobacterium	-0.6519	0.0198	AF	negative
										F4208_o_NA	A8_Methanobacterium	-0.691	0.0297	AF	negative
										F50_Pseudogymnoascus	A8_Methanobacterium	-0.6499	0.0495	AF	negative
										F5286_unidentified	A8_Methanobacterium	-0.6038	0.0297	AF	negative
										F5528_o_NA	A8_Methanobacterium	-0.6113	0.0297	AF	negative
										F5930_Pseudeurotium	A8_Methanobacterium	-0.6018	0.0297	AF	negative
										F60_Sordaria	A8_Methanobacterium	-0.7113	0.0396	AF	negative
										F604_o_NA	A8_Methanobacterium	-0.7099	0.0198	AF	negative
										F608_Mortierella	A8_Methanobacterium	-0.8062	0.0198	AF	negative
										F63_o_NA	A8_Methanobacterium	-0.6893	0.0297	AF	negative
										F6773_unidentified	A8_Methanobacterium	-0.6014	0.0099	AF	negative
										F752_Scutellinia	A8_Methanobacterium	-0.8358	0.0297	AF	negative
										F790_Udeniomyces	A8_Methanobacterium	-0.6426	0.0198	AF	negative
										F940_o_NA	A8_Methanobacterium	-0.8207	0.0099	AF	negative

## Sheet: CJ2(2018)
Edge of methanogen and bacterial functional groups										Edge of methanogens
from	to	cor	p_value	Association	Category	Relationship				from	to	cor	p_value	Association	Category
B13_Methylocystis	A59_Methanocella	-0.6879	0.0099	AB	negative	Methanogen-Methanotroph				A12_Methanobacterium	A10_Methanosaeta	0.9766	0.0099	A	positive
B2446_Anaerolinea	A10_Methanosaeta	-0.7647	0.0099	AB	negative	Methanogen-Bacterial decomposer				A176_Methanobacterium	A10_Methanosaeta	-0.8666	0.0198	A	negative
B2446_Anaerolinea	A12_Methanobacterium	-0.7484	0.0198	AB	negative	Methanogen-Bacterial decomposer				A19_Methanocella	A10_Methanosaeta	-0.7258	0.0198	A	negative
B2446_Anaerolinea	A176_Methanobacterium	0.6859	0.0433	AB	positive	Methanogen-Bacterial decomposer				A20_Rice Cluster I	A10_Methanosaeta	0.9906	0.0297	A	positive
B1152_Anaerolinea	A4_Methanosaeta	0.6963	0.0198	AB	positive	Methanogen-Bacterial decomposer				B1_uncultured prokaryote	A10_Methanosaeta	-0.8711	0.0099	AB	negative
B269_Anaerolinea	A59_Methanocella	0.6631	0.005	AB	positive	Methanogen-Bacterial decomposer				B10054_Candidatus Metachlamydia	A10_Methanosaeta	-0.6739	0.0198	AB	negative
B1234_Syntrophus	A10_Methanosaeta	-0.724	0.0099	AB	negative	Methanogen-Syntroph				B11_f_SC-I-84	A10_Methanosaeta	0.9815	0.0198	AB	positive
B1234_Syntrophus	A12_Methanobacterium	-0.7394	0.0198	AB	negative	Methanogen-Syntroph				B11042_Singulisphaera	A10_Methanosaeta	-0.6535	0.0198	AB	negative
B1234_Syntrophus	A176_Methanobacterium	0.6886	0.005	AB	positive	Methanogen-Syntroph				B11337_Bacillus	A10_Methanosaeta	-0.6603	0.0099	AB	negative
B188_Syntrophus	A31_Methanosaeta	0.6724	0.0198	AB	positive	Methanogen-Syntroph				B1220_o_Subgroup 7	A10_Methanosaeta	-0.7996	0.0099	AB	negative
B71_Syntrophobacter	A59_Methanocella	0.6261	0.0137	AB	positive	Methanogen-Syntroph				B1233_Sphingomonas	A10_Methanosaeta	-0.6449	0.0198	AB	negative
B188_Syntrophus	A8_Methanobacterium	0.757	0.0099	AB	positive	Methanogen-Syntroph				B1234_Syntrophus	A10_Methanosaeta	-0.724	0.0099	AB	negative
B3867_Geobacter	A10_Methanosaeta	-0.7233	0.0198	AB	negative	Methanogen-Non-acetogenic syntroph				B1237_uncultured	A10_Methanosaeta	-0.6587	0.0198	AB	negative
B648_Anaeromyxobacter	A10_Methanosaeta	-0.7554	0.0099	AB	negative	Methanogen-Non-acetogenic syntroph				B134_Pseudolabrys	A10_Methanosaeta	0.9757	0.0099	AB	positive
B3867_Geobacter	A12_Methanobacterium	-0.7374	0.0198	AB	negative	Methanogen-Non-acetogenic syntroph				B135_Nakamurella	A10_Methanosaeta	-0.8322	0.0198	AB	negative
B648_Anaeromyxobacter	A12_Methanobacterium	-0.7665	0.0297	AB	negative	Methanogen-Non-acetogenic syntroph				B1398_Leptolinea	A10_Methanosaeta	-0.6761	0.0495	AB	negative
B3867_Geobacter	A176_Methanobacterium	0.6491	0.0137	AB	positive	Methanogen-Non-acetogenic syntroph				B1413_Subgroup 10	A10_Methanosaeta	-0.6668	0.0099	AB	negative
B648_Anaeromyxobacter	A176_Methanobacterium	0.6718	0.0388	AB	positive	Methanogen-Non-acetogenic syntroph				B1427_Thermoanaerobaculum	A10_Methanosaeta	-0.6367	0.0198	AB	negative
B259_Anaeromyxobacter	A19_Methanocella	-0.7192	0.0198	AB	negative	Methanogen-Non-acetogenic syntroph				B1442_f_WD2101 soil group	A10_Methanosaeta	-0.7069	0.0198	AB	negative
B648_Anaeromyxobacter	A4_Methanosaeta	-0.7516	0.0198	AB	negative	Methanogen-Non-acetogenic syntroph				B1475_uncultured bacterium	A10_Methanosaeta	-0.7857	0.0099	AB	negative
B1677_Geobacter	A44_Methanosaeta	0.6423	0.0198	AB	positive	Methanogen-Non-acetogenic syntroph				B1520_Rhodovastum	A10_Methanosaeta	-0.6151	0.0099	AB	negative
B1609_Geobacter	A59_Methanocella	0.6005	0.0137	AB	positive	Methanogen-Non-acetogenic syntroph				B1565_uncultured	A10_Methanosaeta	-0.6015	0.0297	AB	negative
B540_Geobacter	A59_Methanocella	0.6618	0.0334	AB	positive	Methanogen-Non-acetogenic syntroph				B1575_Roseomonas	A10_Methanosaeta	-0.7104	0.0297	AB	negative
B1086_Anaeromyxobacter	A66_Methanosaeta	0.6475	0.0137	AB	positive	Methanogen-Non-acetogenic syntroph				B189_metagenome	A10_Methanosaeta	-0.8048	0.0297	AB	negative
										B19_uncultured soil bacterium	A10_Methanosaeta	0.9843	0.0396	AB	positive
										B2018_uncultured Acidobacteriaceae bacterium	A10_Methanosaeta	-0.7366	0.0198	AB	negative
										B212_f_SC-I-84	A10_Methanosaeta	0.632	0.0198	AB	positive
										B2446_Anaerolinea	A10_Methanosaeta	-0.7647	0.0099	AB	negative
										B2463_Subgroup 10	A10_Methanosaeta	-0.7526	0.0198	AB	negative
										B2489_f_Archangiaceae	A10_Methanosaeta	-0.7722	0.0198	AB	negative
										B2694_Spirochaeta 2	A10_Methanosaeta	-0.6501	0.0495	AB	negative
										B2833_uncultured	A10_Methanosaeta	-0.6349	0.0198	AB	negative
										B2944_uncultured soil bacterium	A10_Methanosaeta	-0.6008	0.0495	AB	negative
										B334_Thermodesulfovibrio	A10_Methanosaeta	0.867	0.0297	AB	positive
										B355_uncultured	A10_Methanosaeta	-0.6953	0.0099	AB	negative
										B3556_uncultured bacterium SJA-121	A10_Methanosaeta	-0.7017	0.0198	AB	negative
										B3794_Paludibaculum	A10_Methanosaeta	-0.6273	0.0396	AB	negative
										B3867_Geobacter	A10_Methanosaeta	-0.7233	0.0198	AB	negative
										B3903_actinobacterium YJF1-30	A10_Methanosaeta	-0.6801	0.0099	AB	negative
										B394_o_MBNT15	A10_Methanosaeta	-0.7753	0.0297	AB	negative
										B431_o_RBG-13-54-9	A10_Methanosaeta	-0.7848	0.0495	AB	negative
										B436_f_Lentimicrobiaceae	A10_Methanosaeta	-0.6728	0.0396	AB	negative
										B4830_uncultured Kiritimatiellaeota bacterium	A10_Methanosaeta	-0.6093	0.0198	AB	negative
										B4904_uncultured bacterium 259	A10_Methanosaeta	-0.6737	0.0198	AB	negative
										B4934_WCHB1-32	A10_Methanosaeta	-0.6418	0.0198	AB	negative
										B5129_uncultured bacterium	A10_Methanosaeta	-0.6273	0.0198	AB	negative
										B534_uncultured bacterium	A10_Methanosaeta	-0.6558	0.0198	AB	negative
										B6105_uncultured bacterium	A10_Methanosaeta	-0.7137	0.0198	AB	negative
										B631_f_uncultured	A10_Methanosaeta	-0.6021	0.0396	AB	negative
										B6408_Azospirillum	A10_Methanosaeta	-0.6275	0.0297	AB	negative
										B648_Anaeromyxobacter	A10_Methanosaeta	-0.7554	0.0099	AB	negative
										B669_Marmoricola	A10_Methanosaeta	-0.7571	0.0198	AB	negative
										B7181_uncultured	A10_Methanosaeta	-0.6784	0.0099	AB	negative
										B765_f_uncultured	A10_Methanosaeta	-0.7412	0.0396	AB	negative
										B790_uncultured Sphingobacteriales bacterium	A10_Methanosaeta	-0.6665	0.0198	AB	negative
										B828_uncultured	A10_Methanosaeta	-0.8138	0.0198	AB	negative
										B84_uncultured Syntrophaceae bacterium	A10_Methanosaeta	0.9766	0.0198	AB	positive
										B85_o_Subgroup 7	A10_Methanosaeta	-0.6751	0.0297	AB	negative
										B9473_uncultured bacterium mle1-16	A10_Methanosaeta	-0.6612	0.0396	AB	negative
										F103_o_NA	A10_Methanosaeta	-0.6034	0.0396	AF	negative
										F1030_o_NA	A10_Methanosaeta	-0.815	0.0198	AF	negative
										F1202_o_NA	A10_Methanosaeta	-0.754	0.0297	AF	negative
										F1714_unidentified	A10_Methanosaeta	-0.6241	0.0495	AF	negative
										F1728_unidentified	A10_Methanosaeta	-0.6485	0.0099	AF	negative
										F1898_Exophiala	A10_Methanosaeta	-0.6104	0.0198	AF	negative
										F194_Emericellopsis	A10_Methanosaeta	-0.6709	0.0099	AF	negative
										F1994_unidentified	A10_Methanosaeta	-0.6217	0.0297	AF	negative
										F205_Schizothecium	A10_Methanosaeta	-0.6626	0.0297	AF	negative
										F213_Mrakiella	A10_Methanosaeta	0.7027	0.0198	AF	positive
										F2214_unidentified	A10_Methanosaeta	-0.6228	0.0495	AF	negative
										F2256_o_NA	A10_Methanosaeta	-0.7058	0.0099	AF	negative
										F2286_unidentified	A10_Methanosaeta	-0.6943	0.0099	AF	negative
										F2647_Rhizophydium	A10_Methanosaeta	-0.7182	0.0198	AF	negative
										F2952_unidentified	A10_Methanosaeta	-0.6878	0.0396	AF	negative
										F3317_unidentified	A10_Methanosaeta	-0.6272	0.0198	AF	negative
										F36_Fusicolla	A10_Methanosaeta	-0.6629	0.0297	AF	negative
										F3770_unidentified	A10_Methanosaeta	-0.6725	0.0297	AF	negative
										F39_Mrakiella	A10_Methanosaeta	0.8168	0.0297	AF	positive
										F4478_unidentified	A10_Methanosaeta	-0.7654	0.0396	AF	negative
										F4509_Mortierella	A10_Methanosaeta	-0.6702	0.0198	AF	negative
										F464_o_NA	A10_Methanosaeta	-0.6382	0.0297	AF	negative
										F4755_unidentified	A10_Methanosaeta	-0.727	0.0099	AF	negative
										F4869_unidentified	A10_Methanosaeta	-0.7026	0.0198	AF	negative
										F529_o_NA	A10_Methanosaeta	-0.7396	0.0198	AF	negative
										F645_unidentified	A10_Methanosaeta	-0.7046	0.0198	AF	negative
										F7306_unidentified	A10_Methanosaeta	-0.6136	0.0198	AF	negative
										F7698_unidentified	A10_Methanosaeta	-0.6005	0.0099	AF	negative
										F8113_unidentified	A10_Methanosaeta	-0.6075	0.0099	AF	negative
										F827_unidentified	A10_Methanosaeta	-0.8017	0.0297	AF	negative
										A176_Methanobacterium	A12_Methanobacterium	-0.8645	0.0099	A	negative
										A20_Rice Cluster I	A12_Methanobacterium	0.9785	0.0099	A	positive
										A4_Methanosaeta	A12_Methanobacterium	0.6103	0.0495	A	positive
										B1_uncultured prokaryote	A12_Methanobacterium	-0.8815	0.0099	AB	negative
										B10054_Candidatus Metachlamydia	A12_Methanobacterium	-0.6465	0.0297	AB	negative
										B11_f_SC-I-84	A12_Methanobacterium	0.9713	0.0198	AB	positive
										B11042_Singulisphaera	A12_Methanobacterium	-0.636	0.0396	AB	negative
										B1129_metagenome	A12_Methanobacterium	-0.6386	0.0297	AB	negative
										B11337_Bacillus	A12_Methanobacterium	-0.6431	0.0198	AB	negative
										B1220_o_Subgroup 7	A12_Methanobacterium	-0.803	0.0099	AB	negative
										B1234_Syntrophus	A12_Methanobacterium	-0.7394	0.0198	AB	negative
										B1237_uncultured	A12_Methanobacterium	-0.6538	0.0297	AB	negative
										B134_Pseudolabrys	A12_Methanobacterium	0.9265	0.0198	AB	positive
										B135_Nakamurella	A12_Methanobacterium	-0.7999	0.0198	AB	negative
										B1398_Leptolinea	A12_Methanobacterium	-0.6834	0.0099	AB	negative
										B1413_Subgroup 10	A12_Methanobacterium	-0.6718	0.0099	AB	negative
										B1427_Thermoanaerobaculum	A12_Methanobacterium	-0.6261	0.0297	AB	negative
										B1442_f_WD2101 soil group	A12_Methanobacterium	-0.7037	0.0198	AB	negative
										B1475_uncultured bacterium	A12_Methanobacterium	-0.7744	0.0297	AB	negative
										B1520_Rhodovastum	A12_Methanobacterium	-0.658	0.0297	AB	negative
										B1565_uncultured	A12_Methanobacterium	-0.6281	0.0198	AB	negative
										B1575_Roseomonas	A12_Methanobacterium	-0.6767	0.0099	AB	negative
										B161_o_NA	A12_Methanobacterium	-0.6392	0.0495	AB	negative
										B184_Candidatus Nitrotoga	A12_Methanobacterium	-0.6671	0.0297	AB	negative
										B189_metagenome	A12_Methanobacterium	-0.7758	0.0297	AB	negative
										B19_uncultured soil bacterium	A12_Methanobacterium	0.9572	0.0099	AB	positive
										B2018_uncultured Acidobacteriaceae bacterium	A12_Methanobacterium	-0.6664	0.0099	AB	negative
										B2446_Anaerolinea	A12_Methanobacterium	-0.7484	0.0198	AB	negative
										B2463_Subgroup 10	A12_Methanobacterium	-0.717	0.0495	AB	negative
										B2489_f_Archangiaceae	A12_Methanobacterium	-0.7534	0.0297	AB	negative
										B2694_Spirochaeta 2	A12_Methanobacterium	-0.6556	0.0198	AB	negative
										B2833_uncultured	A12_Methanobacterium	-0.6333	0.0297	AB	negative
										B3322_uncultured gamma proteobacterium	A12_Methanobacterium	-0.6441	0.0099	AB	negative
										B334_Thermodesulfovibrio	A12_Methanobacterium	0.8483	0.0099	AB	positive
										B355_uncultured	A12_Methanobacterium	-0.6687	0.0099	AB	negative
										B3556_uncultured bacterium SJA-121	A12_Methanobacterium	-0.6576	0.0297	AB	negative
										B373_Arenimonas	A12_Methanobacterium	-0.6039	0.0297	AB	negative
										B3794_Paludibaculum	A12_Methanobacterium	-0.6195	0.0396	AB	negative
										B3867_Geobacter	A12_Methanobacterium	-0.7374	0.0198	AB	negative
										B3903_actinobacterium YJF1-30	A12_Methanobacterium	-0.6577	0.0198	AB	negative
										B394_o_MBNT15	A12_Methanobacterium	-0.763	0.0297	AB	negative
										B431_o_RBG-13-54-9	A12_Methanobacterium	-0.765	0.0297	AB	negative
										B436_f_Lentimicrobiaceae	A12_Methanobacterium	-0.6725	0.0297	AB	negative
										B4904_uncultured bacterium 259	A12_Methanobacterium	-0.68	0.0099	AB	negative
										B4934_WCHB1-32	A12_Methanobacterium	-0.6401	0.0297	AB	negative
										B512_uncultured bacterium	A12_Methanobacterium	-0.6833	0.0396	AB	negative
										B534_uncultured bacterium	A12_Methanobacterium	-0.6309	0.0297	AB	negative
										B604_uncultured soil bacterium	A12_Methanobacterium	-0.6051	0.0297	AB	negative
										B6105_uncultured bacterium	A12_Methanobacterium	-0.6862	0.0099	AB	negative
										B631_f_uncultured	A12_Methanobacterium	-0.6165	0.0396	AB	negative
										B6408_Azospirillum	A12_Methanobacterium	-0.6317	0.0297	AB	negative
										B648_Anaeromyxobacter	A12_Methanobacterium	-0.7665	0.0297	AB	negative
										B669_Marmoricola	A12_Methanobacterium	-0.728	0.0099	AB	negative
										B7181_uncultured	A12_Methanobacterium	-0.6628	0.0198	AB	negative
										B765_f_uncultured	A12_Methanobacterium	-0.7247	0.0297	AB	negative
										B828_uncultured	A12_Methanobacterium	-0.7979	0.0198	AB	negative
										B84_uncultured Syntrophaceae bacterium	A12_Methanobacterium	0.9589	0.0198	AB	positive
										B85_o_Subgroup 7	A12_Methanobacterium	-0.6658	0.0198	AB	negative
										B9473_uncultured bacterium mle1-16	A12_Methanobacterium	-0.6813	0.0495	AB	negative
										F103_o_NA	A12_Methanobacterium	-0.6164	0.0099	AF	negative
										F1030_o_NA	A12_Methanobacterium	-0.803	0.0099	AF	negative
										F1202_o_NA	A12_Methanobacterium	-0.7573	0.0099	AF	negative
										F1714_unidentified	A12_Methanobacterium	-0.6085	0.0495	AF	negative
										F1728_unidentified	A12_Methanobacterium	-0.6547	0.0198	AF	negative
										F1751_unidentified	A12_Methanobacterium	-0.609	0.0198	AF	negative
										F1898_Exophiala	A12_Methanobacterium	-0.6142	0.0099	AF	negative
										F194_Emericellopsis	A12_Methanobacterium	-0.6712	0.0099	AF	negative
										F213_Mrakiella	A12_Methanobacterium	0.7122	0.0396	AF	positive
										F2214_unidentified	A12_Methanobacterium	-0.6588	0.0198	AF	negative
										F2256_o_NA	A12_Methanobacterium	-0.6941	0.0297	AF	negative
										F2286_unidentified	A12_Methanobacterium	-0.6489	0.0396	AF	negative
										F2647_Rhizophydium	A12_Methanobacterium	-0.6854	0.0297	AF	negative
										F2952_unidentified	A12_Methanobacterium	-0.6697	0.0198	AF	negative
										F3317_unidentified	A12_Methanobacterium	-0.6035	0.0495	AF	negative
										F3770_unidentified	A12_Methanobacterium	-0.6738	0.0099	AF	negative
										F39_Mrakiella	A12_Methanobacterium	0.8422	0.0396	AF	positive
										F4297_o_NA	A12_Methanobacterium	-0.621	0.0297	AF	negative
										F4478_unidentified	A12_Methanobacterium	-0.7491	0.0099	AF	negative
										F4509_Mortierella	A12_Methanobacterium	-0.669	0.0198	AF	negative
										F4755_unidentified	A12_Methanobacterium	-0.7115	0.0198	AF	negative
										F4869_unidentified	A12_Methanobacterium	-0.704	0.0396	AF	negative
										F529_o_NA	A12_Methanobacterium	-0.698	0.0396	AF	negative
										F645_unidentified	A12_Methanobacterium	-0.6988	0.0297	AF	negative
										F7306_unidentified	A12_Methanobacterium	-0.6152	0.0198	AF	negative
										F827_unidentified	A12_Methanobacterium	-0.7818	0.0198	AF	negative
										A19_Methanocella	A176_Methanobacterium	0.6662	0.0297	A	positive
										A20_Rice Cluster I	A176_Methanobacterium	-0.8676	0.0198	A	negative
										B1_uncultured prokaryote	A176_Methanobacterium	0.7841	0.0198	AB	positive
										B10054_Candidatus Metachlamydia	A176_Methanobacterium	0.6212	0.005	AB	positive
										B10566_Aquicella	A176_Methanobacterium	0.6201	0.0137	AB	positive
										B11_f_SC-I-84	A176_Methanobacterium	-0.8679	0.0099	AB	negative
										B1129_metagenome	A176_Methanobacterium	0.6318	0.005	AB	positive
										B1220_o_Subgroup 7	A176_Methanobacterium	0.7093	0.0137	AB	positive
										B1234_Syntrophus	A176_Methanobacterium	0.6886	0.005	AB	positive
										B1237_uncultured	A176_Methanobacterium	0.6049	0.005	AB	positive
										B134_Pseudolabrys	A176_Methanobacterium	-0.8474	0.0495	AB	negative
										B135_Nakamurella	A176_Methanobacterium	0.6825	0.005	AB	positive
										B1398_Leptolinea	A176_Methanobacterium	0.6986	0.0235	AB	positive
										B1475_uncultured bacterium	A176_Methanobacterium	0.6587	0.0235	AB	positive
										B1575_Roseomonas	A176_Methanobacterium	0.651	0.0137	AB	positive
										B189_metagenome	A176_Methanobacterium	0.7361	0.0137	AB	positive
										B19_uncultured soil bacterium	A176_Methanobacterium	-0.8661	0.0297	AB	negative
										B2018_uncultured Acidobacteriaceae bacterium	A176_Methanobacterium	0.6445	0.019	AB	positive
										B2446_Anaerolinea	A176_Methanobacterium	0.6859	0.0433	AB	positive
										B2463_Subgroup 10	A176_Methanobacterium	0.6355	0.0137	AB	positive
										B2489_f_Archangiaceae	A176_Methanobacterium	0.7046	0.0235	AB	positive
										B334_Thermodesulfovibrio	A176_Methanobacterium	-0.7255	0.0099	AB	negative
										B355_uncultured	A176_Methanobacterium	0.6125	0.005	AB	positive
										B3556_uncultured bacterium SJA-121	A176_Methanobacterium	0.6399	0.0235	AB	positive
										B3867_Geobacter	A176_Methanobacterium	0.6491	0.0137	AB	positive
										B3903_actinobacterium YJF1-30	A176_Methanobacterium	0.6012	0.0235	AB	positive
										B394_o_MBNT15	A176_Methanobacterium	0.7078	0.0137	AB	positive
										B431_o_RBG-13-54-9	A176_Methanobacterium	0.6669	0.0235	AB	positive
										B512_uncultured bacterium	A176_Methanobacterium	0.6165	0.0091	AB	positive
										B534_uncultured bacterium	A176_Methanobacterium	0.6112	0.0137	AB	positive
										B6105_uncultured bacterium	A176_Methanobacterium	0.6098	0.0137	AB	positive
										B648_Anaeromyxobacter	A176_Methanobacterium	0.6718	0.0388	AB	positive
										B669_Marmoricola	A176_Methanobacterium	0.6729	0.0334	AB	positive
										B7181_uncultured	A176_Methanobacterium	0.6073	0.0235	AB	positive
										B765_f_uncultured	A176_Methanobacterium	0.6882	0.0137	AB	positive
										B828_uncultured	A176_Methanobacterium	0.7338	0.005	AB	positive
										B84_uncultured Syntrophaceae bacterium	A176_Methanobacterium	-0.8522	0.0495	AB	negative
										F1030_o_NA	A176_Methanobacterium	0.7027	0.005	AF	positive
										F1202_o_NA	A176_Methanobacterium	0.6847	0.0235	AF	positive
										F1728_unidentified	A176_Methanobacterium	0.6032	0.005	AF	positive
										F2256_o_NA	A176_Methanobacterium	0.6314	0.0334	AF	positive
										F2286_unidentified	A176_Methanobacterium	0.6032	0.0235	AF	positive
										F2647_Rhizophydium	A176_Methanobacterium	0.6524	0.0433	AF	positive
										F2952_unidentified	A176_Methanobacterium	0.6251	0.0235	AF	positive
										F3770_unidentified	A176_Methanobacterium	0.6213	0.0235	AF	positive
										F39_Mrakiella	A176_Methanobacterium	-0.7429	0.0297	AF	negative
										F4478_unidentified	A176_Methanobacterium	0.6675	0.0137	AF	positive
										F4755_unidentified	A176_Methanobacterium	0.65	0.0137	AF	positive
										F4869_unidentified	A176_Methanobacterium	0.6337	0.0137	AF	positive
										F529_o_NA	A176_Methanobacterium	0.6835	0.0235	AF	positive
										F645_unidentified	A176_Methanobacterium	0.632	0.0235	AF	positive
										F827_unidentified	A176_Methanobacterium	0.7261	0.005	AF	positive
										A20_Rice Cluster I	A19_Methanocella	-0.6856	0.0297	A	negative
										A44_Methanosaeta	A19_Methanocella	0.6288	0.0495	A	positive
										B11_f_SC-I-84	A19_Methanocella	-0.6733	0.0198	AB	negative
										B1233_Sphingomonas	A19_Methanocella	0.6361	0.0297	AB	positive
										B127_Gemmatimonas	A19_Methanocella	0.6509	0.0495	AB	positive
										B129_f_Burkholderiaceae	A19_Methanocella	-0.6877	0.0099	AB	negative
										B134_Pseudolabrys	A19_Methanocella	-0.7378	0.0297	AB	negative
										B155_Mycobacterium	A19_Methanocella	-0.6638	0.0297	AB	negative
										B1706_uncultured	A19_Methanocella	0.6896	0.0099	AB	positive
										B189_metagenome	A19_Methanocella	0.6161	0.0297	AB	positive
										B19_uncultured soil bacterium	A19_Methanocella	-0.7221	0.0297	AB	negative
										B197_uncultured proteobacterium	A19_Methanocella	0.6012	0.0297	AB	positive
										B2018_uncultured Acidobacteriaceae bacterium	A19_Methanocella	0.6632	0.0099	AB	positive
										B2489_f_Archangiaceae	A19_Methanocella	0.6186	0.0198	AB	positive
										B259_Anaeromyxobacter	A19_Methanocella	-0.7192	0.0198	AB	negative
										B272_uncultured Chlorobi bacterium	A19_Methanocella	0.6824	0.0099	AB	positive
										B33_uncultured	A19_Methanocella	0.652	0.0396	AB	positive
										B334_Thermodesulfovibrio	A19_Methanocella	-0.6497	0.0297	AB	negative
										B35_uncultured Anaerolineaceae bacterium	A19_Methanocella	-0.7266	0.0099	AB	negative
										B428_o_NA	A19_Methanocella	0.7196	0.0396	AB	positive
										B52_RBG-16-58-14	A19_Methanocella	0.6991	0.0099	AB	positive
										B78_f_Anaerolineaceae	A19_Methanocella	-0.685	0.0099	AB	negative
										B790_uncultured Sphingobacteriales bacterium	A19_Methanocella	0.6712	0.0198	AB	positive
										B80_ADurb.Bin063-1	A19_Methanocella	0.6177	0.0396	AB	positive
										B828_uncultured	A19_Methanocella	0.6305	0.0099	AB	positive
										B84_uncultured Syntrophaceae bacterium	A19_Methanocella	-0.6627	0.0396	AB	negative
										B94_f_Micropepsaceae	A19_Methanocella	-0.7392	0.0297	AB	negative
										F1030_o_NA	A19_Methanocella	0.6047	0.0297	AF	positive
										F1101_unidentified	A19_Methanocella	0.6804	0.0396	AF	positive
										F1994_unidentified	A19_Methanocella	0.6229	0.0099	AF	positive
										F205_Schizothecium	A19_Methanocella	0.6142	0.0396	AF	positive
										F4478_unidentified	A19_Methanocella	0.6359	0.0396	AF	positive
										F827_unidentified	A19_Methanocella	0.6263	0.0099	AF	positive
										A32_o_NA	A21_Methanosarcina	-0.6281	0.0297	A	negative
										A63_Methanosarcina	A21_Methanosarcina	-0.9339	0.0297	A	negative
										B118_Nitrospira	A21_Methanosarcina	0.6913	0.0495	AB	positive
										B125_uncultured	A21_Methanosarcina	0.7131	0.0495	AB	positive
										B1741_uncultured Caldilinea sp.	A21_Methanosarcina	-0.6128	0.0099	AB	negative
										B177_Desulfobacca	A21_Methanosarcina	0.7053	0.0297	AB	positive
										B190_Haliangium	A21_Methanosarcina	-0.6202	0.0396	AB	negative
										B2046_o_NA	A21_Methanosarcina	-0.6858	0.0198	AB	negative
										B2096_uncultured Banisveld landfill bacterium BVC56	A21_Methanosarcina	-0.6356	0.0396	AB	negative
										B2759_uncultured Gemmatimonadetes bacterium	A21_Methanosarcina	-0.6296	0.0396	AB	negative
										B39_f_Burkholderiaceae	A21_Methanosarcina	-0.6994	0.0198	AB	negative
										B449_uncultured bacterium 213	A21_Methanosarcina	-0.6302	0.0495	AB	negative
										B552_uncultured bacterium	A21_Methanosarcina	0.8293	0.0099	AB	positive
										B603_o_MBNT15	A21_Methanosarcina	-0.6532	0.0396	AB	negative
										B6269_Caulobacter	A21_Methanosarcina	-0.6162	0.0297	AB	negative
										B806_o_NA	A21_Methanosarcina	-0.8146	0.0099	AB	negative
										B973_Acidibacter	A21_Methanosarcina	0.7085	0.0396	AB	positive
										F123_f_Didymosphaeriaceae	A21_Methanosarcina	0.9552	0.0099	AF	positive
										F148_unidentified	A21_Methanosarcina	-0.7392	0.0198	AF	negative
										F163_o_NA	A21_Methanosarcina	0.6565	0.0396	AF	positive
										F212_Penicillium	A21_Methanosarcina	0.7546	0.0099	AF	positive
										F237_Fusarium	A21_Methanosarcina	0.6992	0.0495	AF	positive
										F32_Dimorphospora	A21_Methanosarcina	-0.8031	0.0396	AF	negative
										F356_Trichoderma	A21_Methanosarcina	-0.8551	0.0099	AF	negative
										F3813_o_NA	A21_Methanosarcina	-0.8028	0.0099	AF	negative
										F895_unidentified	A21_Methanosarcina	-0.6492	0.0099	AF	negative
										F984_o_NA	A21_Methanosarcina	-0.6056	0.0495	AF	negative
										A8_Methanobacterium	A3_o_NA	0.6441	0.0495	A	positive
										A8_Methanobacterium	A31_Methanosaeta	0.6864	0.0198	A	positive
										B1082_uncultured prokaryote	A31_Methanosaeta	0.673	0.0396	AB	positive
										B124_Massilia	A31_Methanosaeta	0.6674	0.0297	AB	positive
										B130_uncultured	A31_Methanosaeta	0.6819	0.0099	AB	positive
										B131_Candidatus Solibacter	A31_Methanosaeta	0.6127	0.0495	AB	positive
										B137_uncultured	A31_Methanosaeta	-0.6521	0.0198	AB	negative
										B1462_o_R7C24	A31_Methanosaeta	0.6303	0.0198	AB	positive
										B149_uncultured Ferrimicrobium sp.	A31_Methanosaeta	0.7047	0.0198	AB	positive
										B164_GOUTB8	A31_Methanosaeta	0.68	0.0297	AB	positive
										B188_Syntrophus	A31_Methanosaeta	0.6724	0.0198	AB	positive
										B214_Sulfurifustis	A31_Methanosaeta	-0.6696	0.0099	AB	negative
										B236_o_RBG-13-54-9	A31_Methanosaeta	0.6995	0.0099	AB	positive
										B244_o_NA	A31_Methanosaeta	-0.6702	0.0198	AB	negative
										B255_uncultured	A31_Methanosaeta	0.7147	0.0297	AB	positive
										B278_f_Burkholderiaceae	A31_Methanosaeta	-0.6337	0.0297	AB	negative
										B320_Gemmatimonas	A31_Methanosaeta	0.633	0.0495	AB	positive
										B343_uncultured	A31_Methanosaeta	-0.6319	0.0099	AB	negative
										B362_uncultured	A31_Methanosaeta	-0.7084	0.0099	AB	negative
										B402_uncultured prokaryote	A31_Methanosaeta	-0.6889	0.0198	AB	negative
										B509_o_Myxococcales	A31_Methanosaeta	0.6208	0.0396	AB	positive
										B529_Fodinicola	A31_Methanosaeta	0.6074	0.0297	AB	positive
										B56_uncultured prokaryote	A31_Methanosaeta	0.6174	0.0297	AB	positive
										B568_o_Gaiellales	A31_Methanosaeta	0.6628	0.0297	AB	positive
										B654_uncultured	A31_Methanosaeta	-0.6907	0.0198	AB	negative
										B68_Noviherbaspirillum	A31_Methanosaeta	0.6575	0.0297	AB	positive
										B940_Hymenobacter	A31_Methanosaeta	0.6281	0.0198	AB	positive
										B95_o_RCP2-54	A31_Methanosaeta	-0.6329	0.0099	AB	negative
										F1_Guehomyces	A31_Methanosaeta	-0.7924	0.0297	AF	negative
										F121_o_NA	A31_Methanosaeta	0.7601	0.0099	AF	positive
										F132_unidentified	A31_Methanosaeta	-0.6922	0.0396	AF	negative
										F142_Mortierella	A31_Methanosaeta	-0.6936	0.0099	AF	negative
										F15_o_Sordariales	A31_Methanosaeta	-0.7703	0.0099	AF	negative
										F165_o_NA	A31_Methanosaeta	0.6422	0.0396	AF	positive
										F17_Cladosporium	A31_Methanosaeta	0.6379	0.0297	AF	positive
										F175_o_NA	A31_Methanosaeta	-0.6417	0.0396	AF	negative
										F1948_o_NA	A31_Methanosaeta	0.6399	0.0396	AF	positive
										F262_Mortierella	A31_Methanosaeta	-0.6861	0.0396	AF	negative
										F42_Arnium	A31_Methanosaeta	-0.781	0.0099	AF	negative
										F541_Neobulgaria	A31_Methanosaeta	-0.6559	0.0495	AF	negative
										F55_o_NA	A31_Methanosaeta	-0.684	0.0495	AF	negative
										F601_o_NA	A31_Methanosaeta	-0.6766	0.0198	AF	negative
										F81_Schizothecium	A31_Methanosaeta	0.6453	0.0198	AF	positive
										F99_f_Nectriaceae	A31_Methanosaeta	-0.7433	0.0099	AF	negative
										A7_f_uncultured	A4_Methanosaeta	0.7595	0.0099	A	positive
										B1152_Anaerolinea	A4_Methanosaeta	0.6963	0.0198	AB	positive
										B142_uncultured Thermoflavimicrobium sp.	A4_Methanosaeta	0.6624	0.0297	AB	positive
										B180_Actinobacteria bacterium RBG_19FT_COMBO_70_19	A4_Methanosaeta	-0.6709	0.0198	AB	negative
										B19_uncultured soil bacterium	A4_Methanosaeta	0.6751	0.0297	AB	positive
										B2170_Rhodoferax	A4_Methanosaeta	-0.7245	0.0495	AB	negative
										B241_Ferruginibacter	A4_Methanosaeta	0.7759	0.0198	AB	positive
										B28_Desulfobacca	A4_Methanosaeta	-0.6235	0.0099	AB	negative
										B3794_Paludibaculum	A4_Methanosaeta	-0.6715	0.0396	AB	negative
										B472_alphaI cluster	A4_Methanosaeta	-0.6656	0.0396	AB	negative
										B480_Desulfobacca	A4_Methanosaeta	0.6757	0.0297	AB	positive
										B491_Sideroxydans	A4_Methanosaeta	-0.7306	0.0297	AB	negative
										B493_o_uncultured	A4_Methanosaeta	-0.6564	0.0495	AB	negative
										B604_uncultured soil bacterium	A4_Methanosaeta	-0.7345	0.0198	AB	negative
										B648_Anaeromyxobacter	A4_Methanosaeta	-0.7516	0.0198	AB	negative
										B724_uncultured bacterium	A4_Methanosaeta	0.6498	0.0396	AB	positive
										B751_CL500-29 marine group	A4_Methanosaeta	0.8061	0.0099	AB	positive
										B753_Mycobacterium	A4_Methanosaeta	-0.6342	0.0297	AB	negative
										B822_uncultured Termite group 1 bacterium	A4_Methanosaeta	-0.6165	0.0495	AB	negative
										B875_uncultured bacterium	A4_Methanosaeta	-0.6759	0.0198	AB	negative
										B929_uncultured Chloroflexi bacterium	A4_Methanosaeta	-0.6175	0.0297	AB	negative
										F1_Guehomyces	A4_Methanosaeta	-0.7086	0.0495	AF	negative
										F10_Mrakia	A4_Methanosaeta	-0.7535	0.0495	AF	negative
										F13_Schizothecium	A4_Methanosaeta	-0.7308	0.0297	AF	negative
										F145_o_NA	A4_Methanosaeta	0.6687	0.0099	AF	positive
										F1473_unidentified	A4_Methanosaeta	-0.6878	0.0198	AF	negative
										F15_o_Sordariales	A4_Methanosaeta	-0.6615	0.0495	AF	negative
										F213_Mrakiella	A4_Methanosaeta	0.7499	0.0198	AF	positive
										F216_o_NA	A4_Methanosaeta	-0.747	0.0198	AF	negative
										F28_o_Helotiales	A4_Methanosaeta	-0.7562	0.0297	AF	negative
										F358_o_NA	A4_Methanosaeta	-0.6676	0.0495	AF	negative
										F36_Fusicolla	A4_Methanosaeta	-0.7104	0.0198	AF	negative
										F37_o_Hypocreales	A4_Methanosaeta	-0.746	0.0297	AF	negative
										F434_o_NA	A4_Methanosaeta	0.7425	0.0297	AF	positive
										F692_unidentified	A4_Methanosaeta	-0.6585	0.0396	AF	negative
										F73_Cyberlindnera	A4_Methanosaeta	-0.6634	0.0297	AF	negative
										A46_Methanosaeta	A44_Methanosaeta	0.6265	0.0297	A	positive
										B1157_f_Xanthobacteraceae	A44_Methanosaeta	0.6965	0.0197	AB	positive
										B1233_Sphingomonas	A44_Methanosaeta	0.7533	0.0098	AB	positive
										B134_Pseudolabrys	A44_Methanosaeta	-0.6803	0.0297	AB	negative
										B141_f_uncultured	A44_Methanosaeta	-0.8355	0.0099	AB	negative
										B155_Mycobacterium	A44_Methanosaeta	-0.6863	0.0495	AB	negative
										B1677_Geobacter	A44_Methanosaeta	0.6423	0.0198	AB	positive
										B19_uncultured soil bacterium	A44_Methanosaeta	-0.6138	0.0495	AB	negative
										B2018_uncultured Acidobacteriaceae bacterium	A44_Methanosaeta	0.7145	0.0197	AB	positive
										B2444_uncultured	A44_Methanosaeta	0.7533	0.0098	AB	positive
										B2791_f_env.OPS 17	A44_Methanosaeta	0.6052	0.0197	AB	positive
										B334_Thermodesulfovibrio	A44_Methanosaeta	-0.6449	0.0198	AB	negative
										B357_o_NA	A44_Methanosaeta	0.6969	0.0098	AB	positive
										B386_o_SBR1031	A44_Methanosaeta	0.6146	0.0099	AB	positive
										B405_uncultured	A44_Methanosaeta	-0.7303	0.0297	AB	negative
										B4830_uncultured Kiritimatiellaeota bacterium	A44_Methanosaeta	0.6524	0.0099	AB	positive
										B600_uncultured	A44_Methanosaeta	0.6112	0.0297	AB	positive
										B651_uncultured soil bacterium	A44_Methanosaeta	0.6815	0.0098	AB	positive
										B678_f_Burkholderiaceae	A44_Methanosaeta	0.7734	0.0099	AB	positive
										B753_Mycobacterium	A44_Methanosaeta	0.6796	0.0495	AB	positive
										B84_uncultured Syntrophaceae bacterium	A44_Methanosaeta	-0.6256	0.0495	AB	negative
										F1021_unidentified	A44_Methanosaeta	0.6282	0.0396	AF	positive
										F1293_unidentified	A44_Methanosaeta	0.6623	0.0297	AF	positive
										F175_o_NA	A44_Methanosaeta	0.6473	0.0495	AF	positive
										F1994_unidentified	A44_Methanosaeta	0.7661	0.0098	AF	positive
										F205_Schizothecium	A44_Methanosaeta	0.8291	0.0197	AF	positive
										F2306_o_NA	A44_Methanosaeta	0.6542	0.0098	AF	positive
										F3670_unidentified	A44_Methanosaeta	0.6473	0.0197	AF	positive
										F779_o_Sordariales	A44_Methanosaeta	0.6572	0.0297	AF	positive
										B143_Rhodanobacter	A46_Methanosaeta	0.7144	0.0396	AB	positive
										B156_Candidatus Solibacter	A46_Methanosaeta	0.8904	0.0099	AB	positive
										B1734_f_Burkholderiaceae	A46_Methanosaeta	0.7364	0.0297	AB	positive
										B2018_uncultured Acidobacteriaceae bacterium	A46_Methanosaeta	0.6212	0.0396	AB	positive
										B385_uncultured	A46_Methanosaeta	0.643	0.0396	AB	positive
										B860_metagenome	A46_Methanosaeta	0.6234	0.0099	AB	positive
										B888_f_Bacteroidetes vadinHA17	A46_Methanosaeta	0.7117	0.0198	AB	positive
										F1823_o_NA	A46_Methanosaeta	0.6242	0.0396	AF	positive
										F194_Emericellopsis	A46_Methanosaeta	0.6323	0.0297	AF	positive
										F1994_unidentified	A46_Methanosaeta	0.6354	0.0297	AF	positive
										F205_Schizothecium	A46_Methanosaeta	0.6814	0.0297	AF	positive
										F286_Typhula	A46_Methanosaeta	0.6237	0.0396	AF	positive
										F29_Tetracladium	A46_Methanosaeta	0.6289	0.0198	AF	positive
										F464_o_NA	A46_Methanosaeta	0.6755	0.0297	AF	positive
										F9_o_NA	A46_Methanosaeta	-0.6018	0.0495	AF	negative
										A71_uncultured methanogenic archaeon	A47_Methanobacterium	0.629	0.0396	A	positive
										B2545_uncultured bacterium	A47_Methanobacterium	0.757	0.0296	AB	positive
										B273_uncultured bacterium	A47_Methanobacterium	-0.6359	0.0198	AB	negative
										B279_f_Burkholderiaceae	A47_Methanobacterium	0.8055	0.0098	AB	positive
										B280_Hyphomicrobium	A47_Methanobacterium	-0.6525	0.0297	AB	negative
										B77_Candidatus Nitrotoga	A47_Methanobacterium	-0.6315	0.0297	AB	negative
										F106_o_Hypocreales	A47_Methanobacterium	-0.6006	0.0495	AF	negative
										F1293_unidentified	A47_Methanobacterium	0.6509	0.0495	AF	positive
										A66_Methanosaeta	A53_uncultured euryarchaeote	0.6994	0.0235	A	positive
										B1178_uncultured Chloroflexi bacterium	A58_Methanobacterium	0.6465	0.0396	AB	positive
										B1932_uncultured Prosthecobacter sp.	A58_Methanobacterium	0.8218	0.0197	AB	positive
										B235_Rhodanobacter	A58_Methanobacterium	0.7099	0.0197	AB	positive
										B296_IS-44	A58_Methanobacterium	0.7443	0.0197	AB	positive
										B381_Hyphomicrobium	A58_Methanobacterium	0.689	0.0099	AB	positive
										B495_o_Betaproteobacteriales	A58_Methanobacterium	0.6446	0.0297	AB	positive
										B499_f_Solibacteraceae (Subgroup 3)	A58_Methanobacterium	0.7498	0.0197	AB	positive
										B624_f_uncultured	A58_Methanobacterium	0.6432	0.0098	AB	positive
										B677_Gemmatimonas	A58_Methanobacterium	0.6017	0.0495	AB	positive
										B788_Leptolinea	A58_Methanobacterium	0.6441	0.0099	AB	positive
										B805_Rhodoblastus	A58_Methanobacterium	-0.6349	0.0099	AB	negative
										F154_o_NA	A58_Methanobacterium	-0.6681	0.0198	AF	negative
										F277_o_Sordariales	A58_Methanobacterium	0.6006	0.0495	AF	positive
										F47_Schizothecium	A58_Methanobacterium	0.7277	0.0099	AF	positive
										F535_o_NA	A58_Methanobacterium	0.8263	0.0098	AF	positive
										F589_unidentified	A58_Methanobacterium	0.6301	0.0396	AF	positive
										F88_unidentified	A58_Methanobacterium	0.8312	0.0197	AF	positive
										F913_o_NA	A58_Methanobacterium	0.8134	0.0098	AF	positive
										F93_o_NA	A58_Methanobacterium	0.6135	0.0396	AF	positive
										B1078_Flavisolibacter	A59_Methanocella	0.6285	0.0137	AB	positive
										B1102_Bryobacter	A59_Methanocella	0.6491	0.0137	AB	positive
										B1176_Candidatus Koribacter	A59_Methanocella	0.6684	0.0235	AB	positive
										B1235_Bradyrhizobium	A59_Methanocella	0.6237	0.0235	AB	positive
										B13_Methylocystis	A59_Methanocella	-0.6879	0.0099	AB	negative
										B1309_o_NA	A59_Methanocella	0.6213	0.005	AB	positive
										B1516_o_NA	A59_Methanocella	0.6382	0.005	AB	positive
										B1574_f_Anaerolineaceae	A59_Methanocella	0.6126	0.0137	AB	positive
										B1609_Geobacter	A59_Methanocella	0.6005	0.0137	AB	positive
										B1687_uncultured Gemmatimonadetes bacterium	A59_Methanocella	0.6547	0.0235	AB	positive
										B1899_uncultured	A59_Methanocella	0.6368	0.005	AB	positive
										B206_Conexibacter	A59_Methanocella	0.6678	0.0235	AB	positive
										B211_f_SC-I-84	A59_Methanocella	0.6151	0.0235	AB	positive
										B2282_Massilia	A59_Methanocella	0.6645	0.0235	AB	positive
										B2287_ADurb.Bin063-1	A59_Methanocella	0.6331	0.0137	AB	positive
										B269_Anaerolinea	A59_Methanocella	0.6631	0.005	AB	positive
										B309_uncultured Holophaga sp.	A59_Methanocella	-0.7279	0.0297	AB	negative
										B3235_f_uncultured	A59_Methanocella	0.6182	0.005	AB	positive
										B345_Haliangium	A59_Methanocella	0.6366	0.005	AB	positive
										B427_uncultured Spirochaetales bacterium	A59_Methanocella	0.6528	0.0235	AB	positive
										B482_Subgroup 10	A59_Methanocella	0.613	0.0137	AB	positive
										B540_Geobacter	A59_Methanocella	0.6618	0.0334	AB	positive
										B546_Clostridium sensu stricto 1	A59_Methanocella	0.6299	0.0334	AB	positive
										B57_Conexibacter	A59_Methanocella	-0.8353	0.0099	AB	negative
										B602_Pseudolabrys	A59_Methanocella	0.636	0.0235	AB	positive
										B609_uncultured candidate division OS-K bacterium	A59_Methanocella	0.6512	0.005	AB	positive
										B619_o_NA	A59_Methanocella	0.6004	0.0137	AB	positive
										B623_uncultured Prosthecobacter sp.	A59_Methanocella	0.6447	0.005	AB	positive
										B688_uncultured Planctomyces sp.	A59_Methanocella	0.6016	0.0235	AB	positive
										B71_Syntrophobacter	A59_Methanocella	0.6261	0.0137	AB	positive
										B73_o_NA	A59_Methanocella	0.6383	0.0235	AB	positive
										B811_Phaeodactylibacter	A59_Methanocella	0.6523	0.0137	AB	positive
										B816_o_NA	A59_Methanocella	0.7414	0.005	AB	positive
										F1046_unidentified	A59_Methanocella	0.6442	0.0137	AF	positive
										F1080_unidentified	A59_Methanocella	0.6677	0.005	AF	positive
										F117_o_Sordariales	A59_Methanocella	0.6304	0.005	AF	positive
										F1206_Septoriella	A59_Methanocella	0.7025	0.0137	AF	positive
										F1214_o_NA	A59_Methanocella	0.6264	0.0235	AF	positive
										F1229_unidentified	A59_Methanocella	0.6554	0.0334	AF	positive
										F136_Spirosphaera	A59_Methanocella	0.7046	0.005	AF	positive
										F139_o_NA	A59_Methanocella	0.8032	0.005	AF	positive
										F158_o_NA	A59_Methanocella	-0.6043	0.0297	AF	negative
										F1866_unidentified	A59_Methanocella	0.6579	0.0137	AF	positive
										F2680_unidentified	A59_Methanocella	0.6003	0.0137	AF	positive
										F310_Mrakiella	A59_Methanocella	0.6857	0.0334	AF	positive
										F4068_o_Helotiales	A59_Methanocella	0.6026	0.0334	AF	positive
										F4481_o_NA	A59_Methanocella	0.6458	0.005	AF	positive
										F572_o_NA	A59_Methanocella	0.6123	0.0137	AF	positive
										F72_o_NA	A59_Methanocella	-0.8006	0.0099	AF	negative
										B139_uncultured Iamiaceae bacterium	A61_Methanosaeta	-0.6604	0.0198	AB	negative
										B1793_Candidatus Berkiella	A61_Methanosaeta	0.6817	0.0197	AB	positive
										B1824_bacterium Ellin6515	A61_Methanosaeta	0.6716	0.0296	AB	positive
										B227_Pajaroellobacter	A61_Methanosaeta	0.6305	0.0198	AB	positive
										B286_uncultured	A61_Methanosaeta	0.6408	0.0297	AB	positive
										B495_o_Betaproteobacteriales	A61_Methanosaeta	0.647	0.0396	AB	positive
										B59_f_Intrasporangiaceae	A61_Methanosaeta	0.7905	0.0098	AB	positive
										B615_Desulfomonile	A61_Methanosaeta	0.6493	0.0099	AB	positive
										B858_uncultured Anaerolineaceae bacterium	A61_Methanosaeta	0.612	0.0395	AB	positive
										F112_o_NA	A61_Methanosaeta	0.6063	0.0396	AF	positive
										F22_Mortierella	A61_Methanosaeta	-0.6296	0.0297	AF	negative
										F484_Mortierella	A61_Methanosaeta	0.8425	0.0098	AF	positive
										F72_o_NA	A61_Methanosaeta	-0.7212	0.0495	AF	negative
										B1093_Nitrospira	A63_Methanosarcina	0.6196	0.0297	AB	positive
										B118_Nitrospira	A63_Methanosarcina	-0.6546	0.0495	AB	negative
										B125_uncultured	A63_Methanosarcina	-0.683	0.0396	AB	negative
										B2_uncultured prokaryote	A63_Methanosarcina	-0.6387	0.0396	AB	negative
										B2046_o_NA	A63_Methanosarcina	0.6505	0.0098	AB	positive
										B2096_uncultured Banisveld landfill bacterium BVC56	A63_Methanosarcina	0.6195	0.0198	AB	positive
										B351_Flavisolibacter	A63_Methanosarcina	0.6058	0.0297	AB	positive
										B39_f_Burkholderiaceae	A63_Methanosarcina	0.7064	0.0099	AB	positive
										B412_uncultured	A63_Methanosarcina	-0.7133	0.0099	AB	negative
										B552_uncultured bacterium	A63_Methanosarcina	-0.7194	0.0099	AB	negative
										B603_o_MBNT15	A63_Methanosarcina	0.6456	0.0198	AB	positive
										B806_o_NA	A63_Methanosarcina	0.806	0.0098	AB	positive
										B973_Acidibacter	A63_Methanosarcina	-0.6517	0.0297	AB	negative
										F123_f_Didymosphaeriaceae	A63_Methanosarcina	-0.8896	0.0198	AF	negative
										F148_unidentified	A63_Methanosarcina	0.6875	0.0297	AF	positive
										F163_o_NA	A63_Methanosarcina	-0.6495	0.0297	AF	negative
										F212_Penicillium	A63_Methanosarcina	-0.7242	0.0297	AF	negative
										F32_Dimorphospora	A63_Methanosarcina	0.7513	0.0198	AF	positive
										F356_Trichoderma	A63_Methanosarcina	0.782	0.0197	AF	positive
										F3813_o_NA	A63_Methanosarcina	0.775	0.0098	AF	positive
										B1074_ADurb.Bin063-1	A66_Methanosaeta	0.7143	0.005	AB	positive
										B1086_Anaeromyxobacter	A66_Methanosaeta	0.6475	0.0137	AB	positive
										B1296_uncultured Syntrophobacteraceae bacterium	A66_Methanosaeta	0.618	0.0137	AB	positive
										B1366_o_Betaproteobacteriales	A66_Methanosaeta	0.6875	0.0334	AB	positive
										B1411_uncultured delta proteobacterium	A66_Methanosaeta	0.6014	0.005	AB	positive
										B1502_uncultured Catenulispora sp.	A66_Methanosaeta	0.6117	0.005	AB	positive
										B152_uncultured prokaryote	A66_Methanosaeta	0.7322	0.0235	AB	positive
										B2099_o_Aminicenantales	A66_Methanosaeta	0.6225	0.005	AB	positive
										B240_uncultured Chloroflexi bacterium	A66_Methanosaeta	0.6612	0.005	AB	positive
										B280_Hyphomicrobium	A66_Methanosaeta	-0.8392	0.0297	AB	negative
										B3139_o_NA	A66_Methanosaeta	0.6776	0.005	AB	positive
										B330_uncultured Gemmatimonadetes bacterium	A66_Methanosaeta	0.604	0.0334	AB	positive
										B348_f_Burkholderiaceae	A66_Methanosaeta	0.6598	0.0137	AB	positive
										B352_Massilia	A66_Methanosaeta	0.7244	0.0137	AB	positive
										B547_ADurb.Bin063-1	A66_Methanosaeta	0.7164	0.0137	AB	positive
										B718_o_MBNT15	A66_Methanosaeta	0.6387	0.0137	AB	positive
										B7216_Candidatus Solibacter	A66_Methanosaeta	0.6789	0.005	AB	positive
										B913_f_BSV26	A66_Methanosaeta	0.641	0.0137	AB	positive
										B916_uncultured Holophaga sp.	A66_Methanosaeta	0.6255	0.0137	AB	positive
										B982_Pseudomonas	A66_Methanosaeta	0.6573	0.0235	AB	positive
										F106_o_Hypocreales	A66_Methanosaeta	-0.748	0.0198	AF	negative
										F1107_Peziza	A66_Methanosaeta	0.6284	0.0137	AF	positive
										F125_o_Leucosporidiales	A66_Methanosaeta	0.6641	0.005	AF	positive
										F174_Thanatephorus	A66_Methanosaeta	0.6684	0.0091	AF	positive
										F1797_unidentified	A66_Methanosaeta	0.6704	0.0137	AF	positive
										F184_o_Sordariales	A66_Methanosaeta	-0.6934	0.0198	AF	negative
										F2383_Fusarium	A66_Methanosaeta	0.6151	0.0235	AF	positive
										F2769_o_NA	A66_Methanosaeta	0.6608	0.0137	AF	positive
										F2823_unidentified	A66_Methanosaeta	0.7136	0.005	AF	positive
										F3066_unidentified	A66_Methanosaeta	0.7134	0.0137	AF	positive
										F3275_unidentified	A66_Methanosaeta	0.618	0.0137	AF	positive
										F3475_o_Sordariales	A66_Methanosaeta	0.6379	0.0137	AF	positive
										F3814_unidentified	A66_Methanosaeta	0.6912	0.005	AF	positive
										F417_Cryptococcus	A66_Methanosaeta	0.629	0.0235	AF	positive
										F4393_unidentified	A66_Methanosaeta	0.6277	0.0137	AF	positive
										F48_unidentified	A66_Methanosaeta	0.6407	0.0235	AF	positive
										F501_unidentified	A66_Methanosaeta	0.6466	0.0388	AF	positive
										F568_unidentified	A66_Methanosaeta	0.6982	0.005	AF	positive
										F68_o_NA	A66_Methanosaeta	-0.7443	0.0099	AF	negative
										F748_Aureobasidium	A66_Methanosaeta	0.7386	0.005	AF	positive
										F869_o_NA	A66_Methanosaeta	0.714	0.0235	AF	positive
										B1090_uncultured Caldilineaceae bacterium	A8_Methanobacterium	-0.6389	0.0297	AB	negative
										B130_uncultured	A8_Methanobacterium	0.6726	0.0396	AB	positive
										B1462_o_R7C24	A8_Methanobacterium	0.803	0.0099	AB	positive
										B149_uncultured Ferrimicrobium sp.	A8_Methanobacterium	0.9227	0.0099	AB	positive
										B155_Mycobacterium	A8_Methanobacterium	0.701	0.0495	AB	positive
										B164_GOUTB8	A8_Methanobacterium	0.8127	0.0099	AB	positive
										B188_Syntrophus	A8_Methanobacterium	0.757	0.0099	AB	positive
										B202_Ignavibacterium	A8_Methanobacterium	0.6226	0.0495	AB	positive
										B234_Syntrophorhabdus	A8_Methanobacterium	0.7655	0.0099	AB	positive
										B236_o_RBG-13-54-9	A8_Methanobacterium	0.7262	0.0495	AB	positive
										B255_uncultured	A8_Methanobacterium	0.7393	0.0297	AB	positive
										B292_f_BSV26	A8_Methanobacterium	0.715	0.0396	AB	positive
										B304_f_UASB-TL25	A8_Methanobacterium	-0.7085	0.0495	AB	negative
										B32_o_OPB41	A8_Methanobacterium	0.6485	0.0198	AB	positive
										B402_uncultured prokaryote	A8_Methanobacterium	-0.9128	0.0198	AB	negative
										B405_uncultured	A8_Methanobacterium	0.7803	0.0099	AB	positive
										B42_f_Micrococcaceae	A8_Methanobacterium	0.7463	0.0297	AB	positive
										B428_o_NA	A8_Methanobacterium	-0.7031	0.0495	AB	negative
										B441_Hydrogenispora	A8_Methanobacterium	-0.6948	0.0198	AB	negative
										B487_f_Holophagaceae	A8_Methanobacterium	0.7063	0.0099	AB	positive
										B509_o_Myxococcales	A8_Methanobacterium	0.7459	0.0099	AB	positive
										B51_f_uncultured	A8_Methanobacterium	-0.7861	0.0099	AB	negative
										B56_uncultured prokaryote	A8_Methanobacterium	0.7357	0.0198	AB	positive
										B598_Clostridium sensu stricto 13	A8_Methanobacterium	-0.7023	0.0297	AB	negative
										B654_uncultured	A8_Methanobacterium	-0.7253	0.0198	AB	negative
										B68_Noviherbaspirillum	A8_Methanobacterium	0.7158	0.0297	AB	positive
										B940_Hymenobacter	A8_Methanobacterium	0.6423	0.0297	AB	positive
										F121_o_NA	A8_Methanobacterium	0.6937	0.0396	AF	positive
										F132_unidentified	A8_Methanobacterium	-0.7065	0.0495	AF	negative
										F175_o_NA	A8_Methanobacterium	-0.7411	0.0198	AF	negative
										F1948_o_NA	A8_Methanobacterium	0.7158	0.0198	AF	positive
										F323_o_NA	A8_Methanobacterium	0.6281	0.0495	AF	positive
										F42_Arnium	A8_Methanobacterium	-0.6943	0.0297	AF	negative
										F55_o_NA	A8_Methanobacterium	-0.7388	0.0198	AF	negative
										F841_o_Polyporales	A8_Methanobacterium	0.7424	0.0099	AF	positive
										F881_unidentified	A8_Methanobacterium	-0.7106	0.0297	AF	negative
										F94_f_Didymellaceae	A8_Methanobacterium	0.8077	0.0198	AF	positive

## Sheet: YS1
Edge of methanogen and bacterial functional groups										Edge of methanogens
from	to	cor	p_value	Association	Category	Relationship				from	to	cor	p_value	Association	Category
B13_Methylocystis	A17_Methanobacterium	-0.7018	0.0297	AB	negative	Methanogen-Methanotroph				A12_Methanobacterium	F1794_o_NA	-0.6639	0.0198	AF	negative
A29_Methanosaeta	B3058_Methylobacter	-0.7103	0.0198	AB	negative	Methanogen-Methanotroph				A127_Methanosaeta	A576_uncultured euryarchaeote	0.6345	0.005	A	positive
B474_Methylobacter	A4_Methanosaeta	-0.6099	0.0495	AB	negative	Methanogen-Methanotroph				A93_Methanosarcina	B2389_f_Anaerolineaceae	0.6223	0.0137	AB	positive
B474_Methylobacter	A27_Methanosaeta	0.6406	0.0198	AB	positive	Methanogen-Methanotroph				A101_Methanosaeta	F452_f_Massarinaceae	0.6263	0.0396	AF	positive
A127_Methanosaeta	B1357_Anaerolinea	0.6243	0.005	AB	positive	Methanogen-Bacterial decomposer				A58_Methanobacterium	F452_f_Massarinaceae	0.762	0.0099	AF	positive
A585_Methanosaeta	B6212_Anaerolinea	0.6447	0.0137	AB	positive	Methanogen-Bacterial decomposer				A125_Methanosaeta	B1117_uncultured delta proteobacterium	-0.7568	0.0099	AB	negative
A101_Methanosaeta	B6212_Anaerolinea	0.6351	0.0235	AB	positive	Methanogen-Bacterial decomposer				A93_Methanosarcina	B4076_uncultured bacterium	0.6728	0.005	AB	positive
A36_Methanosarcina	B6212_Anaerolinea	0.638	0.005	AB	positive	Methanogen-Bacterial decomposer				A66_Methanosaeta	F33_Schizothecium	0.7341	0.0289	AF	positive
A125_Methanosaeta	B857_Anaerolinea	0.6817	0.0396	AB	positive	Methanogen-Bacterial decomposer				A4_Methanosaeta	F33_Schizothecium	-0.6963	0.0099	AF	negative
B7475_Phenylobacterium	A585_Methanosaeta	0.6481	0.005	AB	positive	Methanogen-Bacterial decomposer				A27_Methanosaeta	F33_Schizothecium	0.6429	0.0297	AF	positive
A10_Methanosaeta	B271_Anaerolinea	0.7415	0.0099	AB	positive	Methanogen-Bacterial decomposer				A66_Methanosaeta	B5285_f_Anaerolineaceae	0.6773	0.005	AB	positive
A93_Methanosarcina	B2740_Anaerolinea	0.6218	0.0388	AB	positive	Methanogen-Bacterial decomposer				A585_Methanosaeta	F152_f_Helotiales_fam_Incertae_sedis	0.6869	0.0137	AF	positive
A4_Methanosaeta	B2740_Anaerolinea	-0.6451	0.0495	AB	negative	Methanogen-Bacterial decomposer				A101_Methanosaeta	F152_f_Helotiales_fam_Incertae_sedis	0.7235	0.005	AF	positive
A27_Methanosaeta	B2740_Anaerolinea	0.6699	0.0495	AB	positive	Methanogen-Bacterial decomposer				A36_Methanosarcina	F152_f_Helotiales_fam_Incertae_sedis	0.7193	0.0137	AF	positive
A61_Methanosaeta	B176_Phenylobacterium	-0.7015	0.0297	AB	negative	Methanogen-Bacterial decomposer				A12_Methanobacterium	F2197_o_NA	0.6202	0.0396	AF	positive
A42_Methanosarcina	B176_Phenylobacterium	-0.6966	0.0297	AB	negative	Methanogen-Bacterial decomposer				A29_Methanosaeta	F580_unidentified	-0.7988	0.0099	AF	negative
B7475_Phenylobacterium	A101_Methanosaeta	0.7005	0.0235	AB	positive	Methanogen-Bacterial decomposer				A42_Methanosarcina	B1743_Spirochaeta 2	0.6062	0.0396	AB	positive
B325_Phenylobacterium	A93_Methanosarcina	0.6281	0.0235	AB	positive	Methanogen-Bacterial decomposer				A127_Methanosaeta	F3990_o_NA	0.6749	0.0137	AF	positive
B7475_Phenylobacterium	A36_Methanosarcina	0.6609	0.0137	AB	positive	Methanogen-Bacterial decomposer				A101_Methanosaeta	A709_uncultured euryarchaeote	0.649	0.005	A	positive
B1980_Cellulomonas	A127_Methanosaeta	0.621	0.0334	AB	positive	Methanogen-Bacterial decomposer				A36_Methanosarcina	A709_uncultured euryarchaeote	0.6919	0.005	A	positive
B2490_Phenylobacterium	A29_Methanosaeta	-0.6561	0.0396	AB	negative	Methanogen-Bacterial decomposer				A125_Methanosaeta	B3001_f_Pedosphaeraceae	0.8068	0.0098	AB	positive
A59_Methanocella	B617_Phenylobacterium	0.6536	0.0137	AB	positive	Methanogen-Bacterial decomposer				A58_Methanobacterium	F757_o_NA	-0.821	0.0099	AF	negative
A59_Methanocella	B8973_Anaerolinea	0.6283	0.0235	AB	positive	Methanogen-Bacterial decomposer				A44_Methanosaeta	A158_o_NA	0.6522	0.0396	A	positive
A59_Methanocella	B851_Phenylobacterium	0.6614	0.005	AB	positive	Methanogen-Bacterial decomposer				A10_Methanosaeta	A158_o_NA	0.7532	0.0099	A	positive
A42_Methanosarcina	B360_Phenylobacterium	0.6077	0.0297	AB	positive	Methanogen-Bacterial decomposer				A80_Methanosarcina	A158_o_NA	0.6725	0.0297	A	positive
A59_Methanocella	B6026_Syntrophobacter	0.6857	0.0334	AB	positive	Methanogen-Syntroph				A19_Methanocella	F285_unidentified	0.6941	0.0198	AF	positive
B3039_Syntrophobacter	A585_Methanosaeta	0.6938	0.0334	AB	positive	Methanogen-Syntroph				A59_Methanocella	F4318_Acaulium	0.6653	0.005	AF	positive
B1234_Syntrophus	A585_Methanosaeta	0.7175	0.005	AB	positive	Methanogen-Syntroph				A127_Methanosaeta	B3143_uncultured soil bacterium PRR-10	0.6236	0.0137	AB	positive
A101_Methanosaeta	B3039_Syntrophobacter	0.7544	0.0137	AB	positive	Methanogen-Syntroph				A125_Methanosaeta	F321_unidentified	-0.7879	0.0198	AF	negative
A36_Methanosarcina	B3039_Syntrophobacter	0.7624	0.0235	AB	positive	Methanogen-Syntroph				A12_Methanobacterium	F227_o_NA	0.6924	0.0297	AF	positive
A29_Methanosaeta	B172_Syntrophobacter	-0.6094	0.0495	AB	negative	Methanogen-Syntroph				A585_Methanosaeta	B4369_o_uncultured	0.6255	0.0137	AB	positive
B1234_Syntrophus	A101_Methanosaeta	0.7036	0.0433	AB	positive	Methanogen-Syntroph				A101_Methanosaeta	B4369_o_uncultured	0.6924	0.0137	AB	positive
A42_Methanosarcina	B71_Syntrophobacter	0.8416	0.0197	AB	positive	Methanogen-Syntroph				A36_Methanosarcina	B4369_o_uncultured	0.7198	0.0137	AB	positive
B1137_Syntrophobacter	A93_Methanosarcina	0.7618	0.0137	AB	positive	Methanogen-Syntroph				A127_Methanosaeta	F4715_unidentified	0.6313	0.0137	AF	positive
B1234_Syntrophus	A36_Methanosarcina	0.7312	0.005	AB	positive	Methanogen-Syntroph				A10_Methanosaeta	F507_unidentified	-0.7808	0.0297	AF	negative
B1239_Syntrophus	A66_Methanosaeta	0.7816	0.0137	AB	positive	Methanogen-Syntroph				A101_Methanosaeta	B4129_Haliangium	0.6392	0.0137	AB	positive
A51_Methanosaeta	B6279_Syntrophomonas	0.6459	0.0197	AB	positive	Methanogen-Syntroph				A36_Methanosarcina	B4129_Haliangium	0.6505	0.005	AB	positive
B307_Geobacter	A31_Methanosaeta	-0.6956	0.0297	AB	negative	Methanogen-Non-acetogenic syntroph				A59_Methanocella	B1467_uncultured bacterium	0.682	0.0334	AB	positive
A66_Methanosaeta	B9919_Anaeromyxobacter	0.6337	0.005	AB	positive	Methanogen-Non-acetogenic syntroph				A58_Methanobacterium	F596_unidentified	0.7489	0.0099	AF	positive
A59_Methanocella	B10446_Anaeromyxobacter	0.6012	0.0334	AB	positive	Methanogen-Non-acetogenic syntroph				A585_Methanosaeta	B7404_Haliangium	0.6665	0.0235	AB	positive
A44_Methanosaeta	B1403_Anaeromyxobacter	0.8257	0.0098	AB	positive	Methanogen-Non-acetogenic syntroph				A101_Methanosaeta	B7404_Haliangium	0.6958	0.0137	AB	positive
A80_Methanosarcina	B1403_Anaeromyxobacter	0.8191	0.0296	AB	positive	Methanogen-Non-acetogenic syntroph				A36_Methanosarcina	B7404_Haliangium	0.6652	0.0334	AB	positive
A29_Methanosaeta	B2763_Anaeromyxobacter	-0.8582	0.0099	AB	negative	Methanogen-Non-acetogenic syntroph				A66_Methanosaeta	F687_unidentified	0.6477	0.005	AF	positive
B1265_Geobacter	A585_Methanosaeta	0.73	0.0137	AB	positive	Methanogen-Non-acetogenic syntroph				A70_Methanosarcina	F434_o_NA	0.6129	0.0495	AF	positive
B260_Anaeromyxobacter	A17_Methanobacterium	-0.707	0.0198	AB	negative	Methanogen-Non-acetogenic syntroph				A19_Methanocella	B6559_f_Nostocaceae	-0.6602	0.0396	AB	negative
A93_Methanosarcina	B735_Anaeromyxobacter	0.7067	0.005	AB	positive	Methanogen-Non-acetogenic syntroph				A59_Methanocella	B6026_Syntrophobacter	0.6857	0.0334	AB	positive
A51_Methanosaeta	B954_Geobacter	0.876	0.0098	AB	positive	Methanogen-Non-acetogenic syntroph				A44_Methanosaeta	A404_uncultured archaeon	0.7141	0.0297	A	positive
A101_Methanosaeta	B1265_Geobacter	0.7634	0.0137	AB	positive	Methanogen-Non-acetogenic syntroph				A80_Methanosarcina	A404_uncultured archaeon	0.6637	0.0396	A	positive
A36_Methanosarcina	B1265_Geobacter	0.7831	0.0137	AB	positive	Methanogen-Non-acetogenic syntroph				A66_Methanosaeta	B1616_Phaselicystis	0.6295	0.005	AB	positive
A66_Methanosaeta	B178_Geobacter	0.6933	0.0235	AB	positive	Methanogen-Non-acetogenic syntroph				A127_Methanosaeta	B574_uncultured bacterium	-0.8284	0.0099	AB	negative
A4_Methanosaeta	B1474_Anaeromyxobacter	-0.6646	0.0198	AB	negative	Methanogen-Non-acetogenic syntroph				A58_Methanobacterium	B574_uncultured bacterium	-0.6827	0.0198	AB	negative
A27_Methanosaeta	B1474_Anaeromyxobacter	0.6822	0.0297	AB	positive	Methanogen-Non-acetogenic syntroph				A29_Methanosaeta	F139_o_NA	0.7288	0.0396	AF	positive
A93_Methanosarcina	B1010_Anaeromyxobacter	0.7574	0.005	AB	positive	Methanogen-Non-acetogenic syntroph				A31_Methanosaeta	F1775_unidentified	0.8007	0.0198	AF	positive
A125_Methanosaeta	B3861_Geobacter	0.6179	0.0198	AB	positive	Methanogen-Non-acetogenic syntroph				A70_Methanosarcina	B664_uncultured bacterium	-0.9017	0.0099	AB	negative
A61_Methanosaeta	B53_Geobacter	0.6818	0.0396	AB	positive	Methanogen-Non-acetogenic syntroph				A31_Methanosaeta	B667_uncultured Prosthecobacter sp.	-0.6593	0.0297	AB	negative
A42_Methanosarcina	B53_Geobacter	0.6436	0.0396	AB	positive	Methanogen-Non-acetogenic syntroph				A17_Methanobacterium	F90_unidentified	-0.653	0.0396	AF	negative
B2412_Geobacter	A12_Methanobacterium	-0.7039	0.0099	AB	negative	Methanogen-Non-acetogenic syntroph				A29_Methanosaeta	F90_unidentified	-0.7224	0.0297	AF	negative
B727_Geobacter	A93_Methanosarcina	0.7518	0.0137	AB	positive	Methanogen-Non-acetogenic syntroph				A10_Methanosaeta	F90_unidentified	-0.6742	0.0297	AF	negative
B2209_Anaeromyxobacter	A127_Methanosaeta	0.613	0.0235	AB	positive	Methanogen-Non-acetogenic syntroph				A17_Methanobacterium	F162_unidentified	0.6696	0.0495	AF	positive
B5792_Geobacter	A127_Methanosaeta	0.6366	0.0235	AB	positive	Methanogen-Non-acetogenic syntroph				A585_Methanosaeta	B5498_AKIW659	0.6101	0.0137	AB	positive
B1073_Geobacter	A66_Methanosaeta	0.7465	0.005	AB	positive	Methanogen-Non-acetogenic syntroph				A101_Methanosaeta	B5498_AKIW659	0.6883	0.0137	AB	positive
B1546_Geobacter	A4_Methanosaeta	-0.6075	0.0396	AB	negative	Methanogen-Non-acetogenic syntroph				A36_Methanosarcina	B5498_AKIW659	0.6616	0.0137	AB	positive
B672_Geobacter	A4_Methanosaeta	-0.7546	0.0495	AB	negative	Methanogen-Non-acetogenic syntroph				A66_Methanosaeta	A177_o_NA	0.7301	0.0235	A	positive
B388_Anaeromyxobacter	A19_Methanocella	-0.6532	0.0396	AB	negative	Methanogen-Non-acetogenic syntroph				A585_Methanosaeta	F840_o_Helotiales	0.7656	0.005	AF	positive
B672_Geobacter	A27_Methanosaeta	0.7289	0.0297	AB	positive	Methanogen-Non-acetogenic syntroph				A101_Methanosaeta	F840_o_Helotiales	0.8223	0.0235	AF	positive
B1546_Geobacter	A44_Methanosaeta	0.766	0.0098	AB	positive	Methanogen-Non-acetogenic syntroph				A36_Methanosarcina	F840_o_Helotiales	0.8212	0.0137	AF	positive
B1931_Geobacter	A44_Methanosaeta	0.7008	0.0297	AB	positive	Methanogen-Non-acetogenic syntroph				A101_Methanosaeta	B6051_Deferrisoma	0.624	0.005	AB	positive
B259_Anaeromyxobacter	A59_Methanocella	0.6979	0.0433	AB	positive	Methanogen-Non-acetogenic syntroph				A36_Methanosarcina	B6051_Deferrisoma	0.6235	0.0137	AB	positive
B1438_Geobacter	A59_Methanocella	0.7784	0.005	AB	positive	Methanogen-Non-acetogenic syntroph				A61_Methanosaeta	F373_o_Helotiales	-0.6009	0.0198	AF	negative
B1120_Anaeromyxobacter	A10_Methanosaeta	-0.608	0.0495	AB	negative	Methanogen-Non-acetogenic syntroph				A19_Methanocella	B575_f_A4b	-0.6608	0.0198	AB	negative
A125_Methanosaeta	B1120_Anaeromyxobacter	0.6242	0.0495	AB	positive	Methanogen-Non-acetogenic syntroph				A127_Methanosaeta	B1357_Anaerolinea	0.6243	0.005	AB	positive
B1546_Geobacter	A80_Methanosarcina	0.7582	0.0296	AB	positive	Methanogen-Non-acetogenic syntroph				A36_Methanosarcina	F1343_o_NA	0.6161	0.0289	AF	positive
B1931_Geobacter	A80_Methanosarcina	0.7398	0.0297	AB	positive	Methanogen-Non-acetogenic syntroph				A51_Methanosaeta	B1313_o_NA	0.7165	0.0197	AB	positive
										A93_Methanosarcina	F106_o_Hypocreales	0.6913	0.019	AF	positive
										A17_Methanobacterium	F338_Trichomerium	0.6701	0.0495	AF	positive
										A70_Methanosarcina	F338_Trichomerium	-0.6432	0.0198	AF	negative
										A93_Methanosarcina	F749_unidentified	0.6318	0.0091	AF	positive
										A127_Methanosaeta	F115_unidentified	0.6128	0.0396	AF	positive
										A61_Methanosaeta	F758_o_NA	0.6015	0.0289	AF	positive
										A59_Methanocella	B4895_o_NA	0.6931	0.005	AB	positive
										A17_Methanobacterium	F1513_unidentified	0.6854	0.0297	AF	positive
										A585_Methanosaeta	B1568_o_Myxococcales	0.6517	0.0235	AB	positive
										A101_Methanosaeta	B1568_o_Myxococcales	0.7385	0.005	AB	positive
										A36_Methanosarcina	B1568_o_Myxococcales	0.7373	0.0235	AB	positive
										A585_Methanosaeta	B2795_o_SBR1031	0.6746	0.005	AB	positive
										A101_Methanosaeta	B2795_o_SBR1031	0.6515	0.005	AB	positive
										A36_Methanosarcina	B2795_o_SBR1031	0.6855	0.005	AB	positive
										A66_Methanosaeta	B1347_o_NA	0.6879	0.005	AB	positive
										A17_Methanobacterium	F1833_o_NA	0.6307	0.0297	AF	positive
										A58_Methanobacterium	F1833_o_NA	-0.7598	0.0099	AF	negative
										A585_Methanosaeta	F483_o_NA	0.6313	0.0235	AF	positive
										A101_Methanosaeta	F483_o_NA	0.71	0.0235	AF	positive
										A36_Methanosarcina	F483_o_NA	0.7182	0.0334	AF	positive
										A127_Methanosaeta	B6204_uncultured	0.6177	0.0137	AB	positive
										A59_Methanocella	A379_uncultured euryarchaeote	0.768	0.005	A	positive
										A585_Methanosaeta	B3035_uncultured soil bacterium	0.6834	0.005	AB	positive
										A101_Methanosaeta	B3035_uncultured soil bacterium	0.757	0.0137	AB	positive
										A36_Methanosarcina	B3035_uncultured soil bacterium	0.7167	0.005	AB	positive
										A93_Methanosarcina	B9913_uncultured Prosthecobacter sp.	0.6725	0.005	AB	positive
										A29_Methanosaeta	B1314_Leptolinea	-0.6459	0.0396	AB	negative
										A4_Methanosaeta	B3288_Phaselicystis	-0.6385	0.0495	AB	negative
										A27_Methanosaeta	B3288_Phaselicystis	0.6581	0.0198	AB	positive
										A93_Methanosarcina	F2203_unidentified	0.6971	0.0137	AF	positive
										A51_Methanosaeta	B2758_o_SBR1031	0.6218	0.0098	AB	positive
										A58_Methanobacterium	F2269_unidentified	0.6907	0.0197	AF	positive
										A70_Methanosarcina	B9273_Candidatus Berkelbacteria bacterium RIFCSPHIGHO2_12_FULL_50_11	0.6098	0.0198	AB	positive
										A31_Methanosaeta	F51_o_Helotiales	-0.842	0.0198	AF	negative
										A42_Methanosarcina	F51_o_Helotiales	-0.6148	0.0495	AF	negative
										A19_Methanocella	F215_unidentified	0.7032	0.0198	AF	positive
										A10_Methanosaeta	B4896_uncultured bacterium	0.6357	0.0297	AB	positive
										F2861_unidentified	A31_Methanosaeta	-0.6639	0.0198	AF	negative
										B806_o_NA	A31_Methanosaeta	0.7412	0.0099	AB	positive
										A202_Nanoarchaeota archaeon SCGC AAA011-D5	A31_Methanosaeta	0.6791	0.0495	A	positive
										F96_unidentified	A31_Methanosaeta	-0.7485	0.0198	AF	negative
										B1376_uncultured soil bacterium	A31_Methanosaeta	0.6272	0.0495	AB	positive
										F389_o_NA	A31_Methanosaeta	-0.6305	0.0297	AF	negative
										F1478_unidentified	A31_Methanosaeta	0.7046	0.0396	AF	positive
										F279_unidentified	A31_Methanosaeta	0.6919	0.0396	AF	positive
										A79_uncultured marine crenarchaeote E6-3G	A31_Methanosaeta	-0.7061	0.0198	A	negative
										B2035_uncultured bacterium	A31_Methanosaeta	-0.6348	0.0297	AB	negative
										B1127_uncultured bacterium	A31_Methanosaeta	-0.6628	0.0198	AB	negative
										F137_o_NA	A31_Methanosaeta	0.6461	0.0495	AF	positive
										F485_unidentified	A31_Methanosaeta	0.7575	0.0099	AF	positive
										F916_Mortierella	A31_Methanosaeta	-0.6665	0.0198	AF	negative
										A174_o_NA	A31_Methanosaeta	-0.893	0.0099	A	negative
										F1168_o_NA	A31_Methanosaeta	-0.6395	0.0396	AF	negative
										B1284_Pir2 lineage	A31_Methanosaeta	-0.6065	0.0297	AB	negative
										B626_Flavobacterium	A31_Methanosaeta	-0.6728	0.0495	AB	negative
										B1570_Clostridium sensu stricto 10	A31_Methanosaeta	-0.6692	0.0198	AB	negative
										B1917_Desulfovirga	A31_Methanosaeta	-0.6591	0.0495	AB	negative
										B14_uncultured Nitrospirae bacterium	A31_Methanosaeta	0.7896	0.0198	AB	positive
										B197_uncultured proteobacterium	A31_Methanosaeta	0.7345	0.0297	AB	positive
										B248_Candidatus Udaeobacter	A31_Methanosaeta	-0.634	0.0396	AB	negative
										B111_uncultured delta proteobacterium	A31_Methanosaeta	0.728	0.0099	AB	positive
										B209_uncultured Desulfuromonadales bacterium	A31_Methanosaeta	-0.7069	0.0495	AB	negative
										B1_uncultured prokaryote	A31_Methanosaeta	0.6274	0.0495	AB	positive
										A58_Methanobacterium	A31_Methanosaeta	-0.6919	0.0297	A	negative
										B901_uncultured prokaryote	A31_Methanosaeta	0.6214	0.0198	AB	positive
										B355_uncultured	A31_Methanosaeta	-0.6129	0.0495	AB	negative
										B782_uncultured Thermaerobacter sp.	A31_Methanosaeta	-0.6586	0.0198	AB	negative
										B1623_uncultured	A31_Methanosaeta	-0.643	0.0198	AB	negative
										B310_Candidatus Koribacter	A31_Methanosaeta	-0.7357	0.0297	AB	negative
										B276_Candidatus Koribacter	A31_Methanosaeta	-0.6454	0.0495	AB	negative
										B691_o_Microtrichales	A31_Methanosaeta	0.6534	0.0495	AB	positive
										B285_f_Burkholderiaceae	A31_Methanosaeta	-0.7202	0.0198	AB	negative
										B307_Geobacter	A31_Methanosaeta	-0.6956	0.0297	AB	negative
										B3886_o_Gastranaerophilales	A31_Methanosaeta	-0.6597	0.0198	AB	negative
										A50_Candidatus Methanoperedens	A31_Methanosaeta	-0.706	0.0495	A	negative
										B546_Clostridium sensu stricto 1	A31_Methanosaeta	-0.6701	0.0198	AB	negative
										F36_Fusicolla	A31_Methanosaeta	-0.6885	0.0495	AF	negative
										F376_Hypholoma	A31_Methanosaeta	0.788	0.0099	AF	positive
										F74_unidentified	A31_Methanosaeta	-0.6155	0.0495	AF	negative
										F717_Symmetrospora	A31_Methanosaeta	0.6326	0.0495	AF	positive
										F1204_Lipomyces	A31_Methanosaeta	0.874	0.0099	AF	positive
										A59_Methanocella	B1370_f_Pedosphaeraceae	0.7085	0.005	AB	positive
										A58_Methanobacterium	F2861_unidentified	0.7605	0.0098	AF	positive
										A17_Methanobacterium	B713_uncultured eubacterium WCHB1-50	-0.643	0.0099	AB	negative
										A12_Methanobacterium	F982_o_NA	0.6683	0.0396	AF	positive
										A42_Methanosarcina	F707_o_NA	-0.6285	0.0495	AF	negative
										A19_Methanocella	F45_o_NA	0.6708	0.0297	AF	positive
										A36_Methanosarcina	F5270_unidentified	0.6042	0.0235	AF	positive
										A93_Methanosarcina	A397_o_NA	0.7243	0.0235	A	positive
										A58_Methanobacterium	A202_Nanoarchaeota archaeon SCGC AAA011-D5	-0.9112	0.0198	A	negative
										A10_Methanosaeta	F54_unidentified	0.7402	0.0198	AF	positive
										A10_Methanosaeta	F3154_o_NA	0.6621	0.0198	AF	positive
										A66_Methanosaeta	F4989_o_NA	0.6142	0.0235	AF	positive
										A51_Methanosaeta	F369_o_NA	-0.6959	0.0297	AF	negative
										A127_Methanosaeta	B11240_Deferrisoma	0.6061	0.005	AB	positive
										A36_Methanosarcina	F320_unidentified	0.6146	0.005	AF	positive
										A585_Methanosaeta	A922_o_NA	0.6269	0.0137	A	positive
										A101_Methanosaeta	A922_o_NA	0.6459	0.0137	A	positive
										A36_Methanosarcina	A922_o_NA	0.7347	0.005	A	positive
										A58_Methanobacterium	F1393_o_NA	-0.651	0.0198	AF	negative
										A66_Methanosaeta	B8825_o_S085	0.6787	0.005	AB	positive
										A12_Methanobacterium	B554_uncultured	-0.6082	0.0396	AB	negative
										A58_Methanobacterium	F138_Rhizophydium	-0.6137	0.0495	AF	negative
										A125_Methanosaeta	F337_o_NA	0.6196	0.019	AF	positive
										A70_Methanosarcina	B1521_o_NA	0.686	0.0396	AB	positive
										A42_Methanosarcina	F1152_unidentified	0.6168	0.0495	AF	positive
										A12_Methanobacterium	F47_Schizothecium	0.6224	0.0198	AF	positive
										A29_Methanosaeta	F47_Schizothecium	-0.8084	0.0198	AF	negative
										A66_Methanosaeta	F1644_unidentified	0.7678	0.0235	AF	positive
										A585_Methanosaeta	F2430_unidentified	0.6067	0.0433	AF	positive
										A101_Methanosaeta	F2430_unidentified	0.6456	0.005	AF	positive
										A36_Methanosarcina	F2430_unidentified	0.6725	0.005	AF	positive
										A127_Methanosaeta	F3891_o_NA	0.6193	0.0137	AF	positive
										A29_Methanosaeta	F3078_unidentified	-0.704	0.0198	AF	negative
										A585_Methanosaeta	B1247_o_Chthonomonadales	0.6993	0.0137	AB	positive
										A101_Methanosaeta	B1247_o_Chthonomonadales	0.6753	0.0137	AB	positive
										A36_Methanosarcina	B1247_o_Chthonomonadales	0.745	0.0334	AB	positive
										A585_Methanosaeta	B10530_uncultured soil bacterium	0.6022	0.0137	AB	positive
										A101_Methanosaeta	B10530_uncultured soil bacterium	0.6514	0.0235	AB	positive
										A36_Methanosarcina	B10530_uncultured soil bacterium	0.6609	0.0235	AB	positive
										A59_Methanocella	A829_uncultured archaeon	0.6929	0.005	A	positive
										A127_Methanosaeta	F2618_o_NA	0.7054	0.0137	AF	positive
										A125_Methanosaeta	B2407_uncultured bacterium	0.6341	0.0396	AB	positive
										A19_Methanocella	B376_uncultured Dehalogenimonas sp.	0.6185	0.0396	AB	positive
										A36_Methanosarcina	A320_o_NA	0.6173	0.005	A	positive
										A61_Methanosaeta	B1634_Desulfomonile	0.6609	0.0099	AB	positive
										A66_Methanosaeta	F576_unidentified	0.6694	0.005	AF	positive
										A10_Methanosaeta	F1852_o_NA	-0.6298	0.0099	AF	negative
										A66_Methanosaeta	B9919_Anaeromyxobacter	0.6337	0.005	AB	positive
										A127_Methanosaeta	F96_unidentified	0.6259	0.0297	AF	positive
										A58_Methanobacterium	F96_unidentified	0.683	0.0396	AF	positive
										A10_Methanosaeta	F39_Mrakiella	0.6936	0.0495	AF	positive
										A80_Methanosarcina	F39_Mrakiella	0.6443	0.0396	AF	positive
										A44_Methanosaeta	F3895_unidentified	0.7468	0.0098	AF	positive
										A80_Methanosarcina	F3895_unidentified	0.7298	0.0098	AF	positive
										A36_Methanosarcina	B10686_Chthonomonas	0.6058	0.0137	AB	positive
										A44_Methanosaeta	F2469_unidentified	0.7047	0.0098	AF	positive
										A80_Methanosarcina	F2469_unidentified	0.7138	0.0098	AF	positive
										A44_Methanosaeta	F725_unidentified	0.6446	0.0297	AF	positive
										A80_Methanosarcina	F725_unidentified	0.6275	0.0099	AF	positive
										A10_Methanosaeta	F1882_unidentified	-0.7418	0.0297	AF	negative
										A44_Methanosaeta	F2276_unidentified	0.6863	0.0099	AF	positive
										A80_Methanosarcina	F2276_unidentified	0.7027	0.0396	AF	positive
										A44_Methanosaeta	F281_unidentified	-0.7216	0.0198	AF	negative
										A10_Methanosaeta	F281_unidentified	-0.7982	0.0198	AF	negative
										A80_Methanosarcina	F281_unidentified	-0.7151	0.0198	AF	negative
										A61_Methanosaeta	B2188_uncultured soil bacterium PRR-12	0.8259	0.0098	AB	positive
										A59_Methanocella	F350_unidentified	-0.6708	0.0297	AF	negative
										A93_Methanosarcina	F239_o_NA	0.835	0.0137	AF	positive
										A51_Methanosaeta	F239_o_NA	0.6126	0.0487	AF	positive
										A58_Methanobacterium	F668_o_NA	0.7254	0.0098	AF	positive
										A10_Methanosaeta	F657_o_NA	-0.771	0.0198	AF	negative
										A125_Methanosaeta	F657_o_NA	0.7509	0.0099	AF	positive
										A12_Methanobacterium	F409_o_NA	0.6155	0.0495	AF	positive
										A29_Methanosaeta	F409_o_NA	-0.6016	0.0297	AF	negative
										A61_Methanosaeta	F409_o_NA	0.6307	0.0289	AF	positive
										A59_Methanocella	B1489_Spirochaeta 2	0.6482	0.0235	AB	positive
										A58_Methanobacterium	F1686_unidentified	0.7039	0.0098	AF	positive
										A12_Methanobacterium	F1211_o_NA	-0.7508	0.0297	AF	negative
										A127_Methanosaeta	F1211_o_NA	0.6313	0.0289	AF	positive
										A59_Methanocella	F695_o_NA	0.6033	0.0289	AF	positive
										A125_Methanosaeta	F248_unidentified	-0.6959	0.0297	AF	negative
										A42_Methanosarcina	B183_f_uncultured	0.6572	0.0198	AB	positive
										A127_Methanosaeta	F527_o_NA	0.6521	0.005	AF	positive
										A44_Methanosaeta	B11058_Coxiella	0.6233	0.0197	AB	positive
										A80_Methanosarcina	B11058_Coxiella	0.6548	0.0098	AB	positive
										A42_Methanosarcina	B2767_uncultured Verrucomicrobia bacterium	0.6023	0.0396	AB	positive
										A93_Methanosarcina	B12343_metagenome	0.603	0.0137	AB	positive
										A51_Methanosaeta	F4038_unidentified	0.6154	0.0197	AF	positive
										A93_Methanosarcina	B607_uncultured bacterium	-0.8055	0.0396	AB	negative
										A51_Methanosaeta	B607_uncultured bacterium	-0.6265	0.0198	AB	negative
										A127_Methanosaeta	B5409_Haliangium	0.6963	0.0137	AB	positive
										A17_Methanobacterium	B1381_bacterium enrichment culture clone auto67_4W	-0.6691	0.0297	AB	negative
										A58_Methanobacterium	B1381_bacterium enrichment culture clone auto67_4W	0.6503	0.0396	AB	positive
										A59_Methanocella	B1739_uncultured Acidobacterium sp.	0.6611	0.0137	AB	positive
										A44_Methanosaeta	F1417_o_NA	0.6088	0.0198	AF	positive
										A10_Methanosaeta	F257_o_NA	-0.6473	0.0396	AF	negative
										A29_Methanosaeta	F2123_o_NA	-0.7483	0.0099	AF	negative
										A59_Methanocella	B1785_o_NA	0.6929	0.0235	AB	positive
										A17_Methanobacterium	F393_unidentified	-0.6138	0.0495	AF	negative
										A44_Methanosaeta	F393_unidentified	-0.6329	0.0297	AF	negative
										A80_Methanosarcina	F393_unidentified	-0.63	0.0297	AF	negative
										A17_Methanobacterium	F677_Kurtzmanomyces	-0.704	0.0198	AF	negative
										A19_Methanocella	B4104_uncultured bacterium	0.6477	0.0396	AB	positive
										A66_Methanosaeta	B10011_o_NA	0.608	0.0235	AB	positive
										A59_Methanocella	B10446_Anaeromyxobacter	0.6012	0.0334	AB	positive
										A19_Methanocella	B425_uncultured eubacterium WCHB1-50	0.6859	0.0396	AB	positive
										A58_Methanobacterium	B835_uncultured bacterium	-0.7353	0.0297	AB	negative
										A44_Methanosaeta	B1490_o_NA	0.625	0.0197	AB	positive
										A80_Methanosarcina	B1490_o_NA	0.6106	0.0494	AB	positive
										A4_Methanosaeta	B407_o_SJA-15	-0.6662	0.0198	AB	negative
										A27_Methanosaeta	B407_o_SJA-15	0.6338	0.0198	AB	positive
										A44_Methanosaeta	B407_o_SJA-15	0.83	0.0098	AB	positive
										A10_Methanosaeta	B407_o_SJA-15	0.6054	0.0495	AB	positive
										A80_Methanosarcina	B407_o_SJA-15	0.8452	0.0098	AB	positive
										A42_Methanosarcina	F8_unidentified	-0.6762	0.0198	AF	negative
										A127_Methanosaeta	F279_unidentified	-0.6222	0.0099	AF	negative
										A10_Methanosaeta	F279_unidentified	-0.6256	0.0495	AF	negative
										A59_Methanocella	B10784_Singulisphaera	0.6327	0.005	AB	positive
										A10_Methanosaeta	F702_o_NA	-0.8707	0.0198	AF	negative
										A66_Methanosaeta	A155_Methanospirillum	0.7351	0.005	A	positive
										A58_Methanobacterium	F817_unidentified	0.6346	0.0098	AF	positive
										A19_Methanocella	B730_uncultured soil bacterium	0.7465	0.0099	AB	positive
										A59_Methanocella	B1771_o_NA	0.6098	0.005	AB	positive
										A61_Methanosaeta	A193_o_NA	0.6659	0.0289	A	positive
										A51_Methanosaeta	B1351_uncultured bacterium	-0.7072	0.0198	AB	negative
										A125_Methanosaeta	F478_unidentified	0.6431	0.0396	AF	positive
										A10_Methanosaeta	B1444_Aquicella	0.7183	0.0495	AB	positive
										A585_Methanosaeta	A321_o_NA	0.7563	0.0137	A	positive
										A101_Methanosaeta	A321_o_NA	0.8015	0.0235	A	positive
										A36_Methanosarcina	A321_o_NA	0.8377	0.005	A	positive
										A585_Methanosaeta	F2397_unidentified	0.6576	0.0137	AF	positive
										A101_Methanosaeta	F2397_unidentified	0.6722	0.0235	AF	positive
										A36_Methanosarcina	F2397_unidentified	0.6759	0.005	AF	positive
										A585_Methanosaeta	F270_o_NA	0.6105	0.0137	AF	positive
										A127_Methanosaeta	B553_uncultured	-0.621	0.0396	AB	negative
										A127_Methanosaeta	A470_uncultured archaeon	0.7319	0.0235	A	positive
										A44_Methanosaeta	B3805_o_NA	0.6206	0.0197	AB	positive
										A80_Methanosarcina	B3805_o_NA	0.6268	0.0098	AB	positive
										A66_Methanosaeta	B1726_uncultured soil bacterium	-0.6507	0.0396	AB	negative
										A51_Methanosaeta	B2509_uncultured soil bacterium	0.606	0.0396	AB	positive
										A101_Methanosaeta	B7679_LD29	0.6001	0.005	AB	positive
										A36_Methanosarcina	B7679_LD29	0.6148	0.005	AB	positive
										A12_Methanobacterium	F1989_o_NA	-0.6317	0.0297	AF	negative
										A59_Methanocella	B2945_uncultured	0.6059	0.0235	AB	positive
										A127_Methanosaeta	F1220_o_NA	0.6839	0.0235	AF	positive
										A4_Methanosaeta	A387_Candidatus Pacearchaeota archaeon CG1_02_31_27	-0.7517	0.0297	A	negative
										A27_Methanosaeta	A387_Candidatus Pacearchaeota archaeon CG1_02_31_27	0.6841	0.0495	A	positive
										A93_Methanosarcina	F1361_o_NA	0.6939	0.0388	AF	positive
										A17_Methanobacterium	B2350_bioreactor metagenome	0.6069	0.0396	AB	positive
										A59_Methanocella	B9543_bacterium Ellin6519	0.6295	0.0137	AB	positive
										A70_Methanosarcina	B798_o_RBG-13-54-9	-0.8788	0.0099	AB	negative
										A58_Methanobacterium	B1597_metagenome	0.636	0.0297	AB	positive
										A10_Methanosaeta	F548_unidentified	0.6675	0.0297	AF	positive
										A127_Methanosaeta	B2877_f_WD2101 soil group	0.6556	0.0137	AB	positive
										A44_Methanosaeta	F637_o_NA	-0.6262	0.0198	AF	negative
										A80_Methanosarcina	F637_o_NA	-0.6322	0.0396	AF	negative
										A66_Methanosaeta	B9475_uncultured Armatimonadetes bacterium	0.6106	0.0235	AB	positive
										A59_Methanocella	B11828_Neochlamydia	0.6039	0.0334	AB	positive
										A101_Methanosaeta	B3122_f_JG30-KF-AS9	0.628	0.0137	AB	positive
										A36_Methanosarcina	B3122_f_JG30-KF-AS9	0.6345	0.0137	AB	positive
										A66_Methanosaeta	F880_unidentified	0.6202	0.0137	AF	positive
										A66_Methanosaeta	B2882_f_Pedosphaeraceae	0.633	0.0137	AB	positive
										A44_Methanosaeta	B1403_Anaeromyxobacter	0.8257	0.0098	AB	positive
										A80_Methanosarcina	B1403_Anaeromyxobacter	0.8191	0.0296	AB	positive
										A29_Methanosaeta	B5512_uncultured bacterium	-0.7215	0.0396	AB	negative
										A10_Methanosaeta	B4002_uncultured bacterium	0.6104	0.0495	AB	positive
										A4_Methanosaeta	A204_o_NA	-0.6281	0.0396	A	negative
										A44_Methanosaeta	A204_o_NA	0.8206	0.0098	A	positive
										A80_Methanosarcina	A204_o_NA	0.8245	0.0098	A	positive
										A29_Methanosaeta	F166_unidentified	-0.63	0.0297	AF	negative
										A10_Methanosaeta	F166_unidentified	-0.7164	0.0297	AF	negative
										A585_Methanosaeta	B6212_Anaerolinea	0.6447	0.0137	AB	positive
										A101_Methanosaeta	B6212_Anaerolinea	0.6351	0.0235	AB	positive
										A36_Methanosarcina	B6212_Anaerolinea	0.638	0.005	AB	positive
										A59_Methanocella	A1006_Candidatus Pacearchaeota archaeon RBG_19FT_COMBO_34_9	0.6006	0.005	A	positive
										A66_Methanosaeta	F660_unidentified	0.6575	0.019	AF	positive
										A10_Methanosaeta	F308_unidentified	-0.6829	0.0198	AF	negative
										A59_Methanocella	B7128_Sh765B-TzT-35	0.6554	0.0137	AB	positive
										A101_Methanosaeta	B6243_o_Aminicenantales	0.6353	0.0137	AB	positive
										A36_Methanosarcina	B6243_o_Aminicenantales	0.6723	0.0137	AB	positive
										A44_Methanosaeta	F489_unidentified	0.6546	0.0297	AF	positive
										A80_Methanosarcina	F489_unidentified	0.6784	0.0198	AF	positive
										A66_Methanosaeta	A418_archaeon GW2011_AR15	0.6682	0.005	A	positive
										A29_Methanosaeta	F107_unidentified	0.7647	0.0099	AF	positive
										A4_Methanosaeta	F107_unidentified	-0.6902	0.0396	AF	negative
										A44_Methanosaeta	F107_unidentified	0.6015	0.0396	AF	positive
										A10_Methanosaeta	F107_unidentified	0.8804	0.0099	AF	positive
										A93_Methanosarcina	F1332_unidentified	0.6148	0.0235	AF	positive
										A29_Methanosaeta	B2763_Anaeromyxobacter	-0.8582	0.0099	AB	negative
										A127_Methanosaeta	B148_uncultured bacterium SHD-71	0.6777	0.0137	AB	positive
										A19_Methanocella	F242_o_NA	-0.8511	0.0099	AF	negative
										A125_Methanosaeta	F2531_unidentified	0.6756	0.0098	AF	positive
										A10_Methanosaeta	F260_unidentified	0.6175	0.0396	AF	positive
										A44_Methanosaeta	F134_unidentified	0.6324	0.0495	AF	positive
										A127_Methanosaeta	B2860_uncultured bacterium	-0.7693	0.0099	AB	negative
										A42_Methanosarcina	F912_unidentified	0.6217	0.0198	AF	positive
										A93_Methanosarcina	B6404_uncultured soil bacterium	0.6974	0.0137	AB	positive
										A59_Methanocella	F25_o_Pleosporales	-0.69	0.0099	AF	negative
										A36_Methanosarcina	F3809_o_NA	0.6423	0.0137	AF	positive
										A12_Methanobacterium	F1515_unidentified	0.6362	0.0297	AF	positive
										A93_Methanosarcina	A886_o_NA	0.6847	0.0334	A	positive
										A125_Methanosaeta	B857_Anaerolinea	0.6817	0.0396	AB	positive
										A12_Methanobacterium	F493_o_NA	-0.7553	0.0099	AF	negative
										A93_Methanosarcina	F266_o_NA	0.7903	0.0091	AF	positive
										A12_Methanobacterium	F180_unidentified	-0.8552	0.0099	AF	negative
										A61_Methanosaeta	F180_unidentified	-0.6547	0.0396	AF	negative
										A58_Methanobacterium	B1173_uncultured bacterium	0.6469	0.0197	AB	positive
										A59_Methanocella	F83_o_NA	0.7401	0.0098	AF	positive
										A42_Methanosarcina	F83_o_NA	0.7252	0.0198	AF	positive
										A12_Methanobacterium	F646_o_NA	-0.6981	0.0198	AF	negative
										A51_Methanosaeta	B1705_o_NA	-0.6119	0.0396	AB	negative
										A66_Methanosaeta	A276_o_NA	0.7465	0.0334	A	positive
										A93_Methanosarcina	F150_Cyphellophora	0.6007	0.0433	AF	positive
										A127_Methanosaeta	A220_o_NA	0.7649	0.005	A	positive
										A58_Methanobacterium	B1127_uncultured bacterium	0.7673	0.0197	AB	positive
										A58_Methanobacterium	B406_uncultured prokaryote	-0.7031	0.0297	AB	negative
										A101_Methanosaeta	B9160_uncultured	0.6161	0.0137	AB	positive
										A36_Methanosarcina	B9160_uncultured	0.6546	0.0137	AB	positive
										A4_Methanosaeta	F208_unidentified	-0.671	0.0495	AF	negative
										A44_Methanosaeta	F208_unidentified	0.8374	0.0197	AF	positive
										A80_Methanosarcina	F208_unidentified	0.8411	0.0098	AF	positive
										A17_Methanobacterium	F328_unidentified	0.8115	0.0198	AF	positive
										A58_Methanobacterium	F328_unidentified	-0.7066	0.0297	AF	negative
										A66_Methanosaeta	F1153_unidentified	-0.6199	0.0297	AF	negative
										A10_Methanosaeta	F1153_unidentified	-0.6531	0.0495	AF	negative
										A59_Methanocella	F3455_o_NA	0.6652	0.0137	AF	positive
										A10_Methanosaeta	F1564_unidentified	-0.746	0.0099	AF	negative
										A44_Methanosaeta	B1857_uncultured	0.7593	0.0197	AB	positive
										A80_Methanosarcina	B1857_uncultured	0.7252	0.0098	AB	positive
										A44_Methanosaeta	F11_unidentified	-0.7434	0.0099	AF	negative
										A80_Methanosarcina	F11_unidentified	-0.7033	0.0198	AF	negative
										A101_Methanosaeta	B7729_uncultured Verrucomicrobia bacterium	0.6778	0.005	AB	positive
										A36_Methanosarcina	B7729_uncultured Verrucomicrobia bacterium	0.6526	0.0137	AB	positive
										A93_Methanosarcina	A517_uncultured euryarchaeote	0.6167	0.0235	A	positive
										A4_Methanosaeta	F217_o_NA	-0.6564	0.0495	AF	negative
										A27_Methanosaeta	F217_o_NA	0.6457	0.0198	AF	positive
										A42_Methanosarcina	B438_uncultured	0.6895	0.0297	AB	positive
										A125_Methanosaeta	B438_uncultured	0.64	0.0198	AB	positive
										A70_Methanosarcina	F35_o_Agaricales	0.7646	0.0099	AF	positive
										A127_Methanosaeta	F1276_o_NA	0.6249	0.0235	AF	positive
										A12_Methanobacterium	F137_o_NA	0.6905	0.0297	AF	positive
										A61_Methanosaeta	F137_o_NA	0.8023	0.0099	AF	positive
										A17_Methanobacterium	F127_Oberwinklerozyma	0.7546	0.0297	AF	positive
										A4_Methanosaeta	F127_Oberwinklerozyma	-0.73	0.0297	AF	negative
										A27_Methanosaeta	F127_Oberwinklerozyma	0.709	0.0495	AF	positive
										A10_Methanosaeta	F127_Oberwinklerozyma	0.7038	0.0396	AF	positive
										A80_Methanosarcina	F127_Oberwinklerozyma	0.6699	0.0297	AF	positive
										A4_Methanosaeta	F1888_unidentified	-0.7043	0.0297	AF	negative
										A27_Methanosaeta	F1888_unidentified	0.6907	0.0297	AF	positive
										A585_Methanosaeta	B4792_uncultured Syntrophobacteraceae bacterium	0.6662	0.0137	AB	positive
										A101_Methanosaeta	B4792_uncultured Syntrophobacteraceae bacterium	0.7457	0.005	AB	positive
										A36_Methanosarcina	B4792_uncultured Syntrophobacteraceae bacterium	0.6791	0.0137	AB	positive
										A29_Methanosaeta	B4792_uncultured Syntrophobacteraceae bacterium	-0.6246	0.0297	AB	negative
										A125_Methanosaeta	F103_o_NA	0.7802	0.0197	AF	positive
										A93_Methanosarcina	B281_uncultured Gemmatimonadetes bacterium	0.7464	0.005	AB	positive
										A44_Methanosaeta	F384_Glaciozyma	0.6682	0.0495	AF	positive
										A80_Methanosarcina	F384_Glaciozyma	0.6824	0.0198	AF	positive
										A44_Methanosaeta	F682_unidentified	-0.6778	0.0297	AF	negative
										A10_Methanosaeta	F682_unidentified	-0.7452	0.0495	AF	negative
										A80_Methanosarcina	F682_unidentified	-0.6627	0.0495	AF	negative
										A66_Methanosaeta	A665_uncultured archaeon	0.7116	0.0235	A	positive
										A894_o_NA	A585_Methanosaeta	0.6199	0.005	A	positive
										B4221_uncultured eubacterium WCHB1-50	A585_Methanosaeta	0.631	0.0433	AB	positive
										B3039_Syntrophobacter	A585_Methanosaeta	0.6938	0.0334	AB	positive
										B3791_uncultured prokaryote	A585_Methanosaeta	0.6074	0.0137	AB	positive
										B3111_Ferruginibacter	A585_Methanosaeta	0.6682	0.0235	AB	positive
										B1102_Bryobacter	A585_Methanosaeta	0.6524	0.0433	AB	positive
										B1265_Geobacter	A585_Methanosaeta	0.73	0.0137	AB	positive
										B626_Flavobacterium	A585_Methanosaeta	0.6202	0.0487	AB	positive
										F1299_unidentified	A585_Methanosaeta	0.6424	0.0137	AF	positive
										B2746_Gaiella	A585_Methanosaeta	0.6354	0.0235	AB	positive
										B1512_ADurb.Bin063-1	A585_Methanosaeta	0.6974	0.0235	AB	positive
										B1106_uncultured	A585_Methanosaeta	0.6734	0.0235	AB	positive
										B10201_o_Myxococcales	A585_Methanosaeta	0.6528	0.0235	AB	positive
										A101_Methanosaeta	A585_Methanosaeta	0.7445	0.0235	A	positive
										F330_unidentified	A585_Methanosaeta	0.6839	0.005	AF	positive
										B150_f_Micrococcaceae	A585_Methanosaeta	-0.7702	0.0198	AB	negative
										B83_uncultured	A585_Methanosaeta	0.7255	0.005	AB	positive
										B497_uncultured	A585_Methanosaeta	-0.7906	0.0198	AB	negative
										A301_archaeon GW2011_AR15	A585_Methanosaeta	0.6951	0.0137	A	positive
										B630_Candidatus Solibacter	A585_Methanosaeta	0.6864	0.005	AB	positive
										B338_Haliangium	A585_Methanosaeta	0.7066	0.0235	AB	positive
										B7740_Tomitella	A585_Methanosaeta	0.6451	0.0235	AB	positive
										B908_f_Archangiaceae	A585_Methanosaeta	0.6882	0.0137	AB	positive
										A36_Methanosarcina	A585_Methanosaeta	0.7761	0.0137	A	positive
										A15_unidentified archaeon	A585_Methanosaeta	0.7682	0.0137	A	positive
										B1582_o_NA	A585_Methanosaeta	0.7127	0.005	AB	positive
										B9038_uncultured soil bacterium	A585_Methanosaeta	0.6971	0.0137	AB	positive
										B7475_Phenylobacterium	A585_Methanosaeta	0.6481	0.005	AB	positive
										B5767_Aquicella	A585_Methanosaeta	0.6477	0.0235	AB	positive
										B3338_uncultured	A585_Methanosaeta	0.6358	0.005	AB	positive
										B6524_f_uncultured	A585_Methanosaeta	0.6022	0.0334	AB	positive
										B1234_Syntrophus	A585_Methanosaeta	0.7175	0.005	AB	positive
										B1691_f_SC-I-84	A585_Methanosaeta	0.7269	0.0334	AB	positive
										B470_f_uncultured	A585_Methanosaeta	0.6779	0.0235	AB	positive
										B3579_uncultured	A585_Methanosaeta	0.6499	0.005	AB	positive
										B3830_uncultured soil bacterium	A585_Methanosaeta	0.6741	0.005	AB	positive
										B40_f_Nocardioidaceae	A585_Methanosaeta	0.6681	0.005	AB	positive
										B1415_Desulfobulbus	A585_Methanosaeta	0.619	0.005	AB	positive
										B1421_Syntrophorhabdus	A585_Methanosaeta	0.613	0.0235	AB	positive
										B510_Candidatus Solibacter	A585_Methanosaeta	0.6398	0.0235	AB	positive
										B426_Kineosporia	A585_Methanosaeta	0.6412	0.0137	AB	positive
										B393_uncultured	A585_Methanosaeta	0.6063	0.0235	AB	positive
										B583_Polaromonas	A585_Methanosaeta	0.6935	0.0137	AB	positive
										B2505_o_WD260	A585_Methanosaeta	0.6226	0.0137	AB	positive
										B4009_Bacillus	A585_Methanosaeta	0.651	0.0137	AB	positive
										A9_Methanoregula	A585_Methanosaeta	0.7224	0.0297	A	positive
										B3775_Pseudorhodoplanes	A585_Methanosaeta	0.7314	0.0137	AB	positive
										B3171_Desulfosporosinus	A585_Methanosaeta	0.6188	0.005	AB	positive
										B504_Ramlibacter	A585_Methanosaeta	0.7116	0.0235	AB	positive
										B2470_Dactylosporangium	A585_Methanosaeta	0.618	0.0137	AB	positive
										B7400_Sphingobacterium	A585_Methanosaeta	0.6782	0.005	AB	positive
										A560_Methanomassiliicoccus	A585_Methanosaeta	0.6902	0.0137	A	positive
										B246_uncultured Rhodocyclaceae bacterium	A585_Methanosaeta	0.6045	0.0198	AB	positive
										B319_Pseudomonas	A585_Methanosaeta	0.6728	0.0334	AB	positive
										B7320_f_Rhizobiaceae	A585_Methanosaeta	0.6803	0.0235	AB	positive
										B185_f_Micrococcaceae	A585_Methanosaeta	-0.7652	0.0099	AB	negative
										B6456_o_NA	A585_Methanosaeta	0.6285	0.005	AB	positive
										B107_f_Micrococcaceae	A585_Methanosaeta	-0.6598	0.0495	AB	negative
										B3333_f_Holophagaceae	A585_Methanosaeta	0.7253	0.005	AB	positive
										F755_Fusarium	A585_Methanosaeta	0.6798	0.005	AF	positive
										F42_Arnium	A585_Methanosaeta	0.6198	0.0289	AF	positive
										F845_unidentified	A585_Methanosaeta	0.6228	0.0235	AF	positive
										A58_Methanobacterium	A174_o_NA	0.6173	0.0396	A	positive
										A58_Methanobacterium	F1168_o_NA	0.7054	0.0396	AF	positive
										A59_Methanocella	B445_uncultured Archangiaceae bacterium	0.6052	0.005	AB	positive
										A59_Methanocella	F1041_unidentified	0.6001	0.0494	AF	positive
										A125_Methanosaeta	F1041_unidentified	0.6805	0.0198	AF	positive
										A66_Methanosaeta	F1044_o_NA	-0.8388	0.0198	AF	negative
										A19_Methanocella	F1044_o_NA	0.6045	0.0396	AF	positive
										A127_Methanosaeta	B2704_uncultured	0.6909	0.005	AB	positive
										A101_Methanosaeta	A894_o_NA	0.7183	0.005	A	positive
										A36_Methanosarcina	A894_o_NA	0.6792	0.005	A	positive
										A42_Methanosarcina	A571_o_NA	0.7393	0.0098	A	positive
										A10_Methanosaeta	F1464_unidentified	-0.6458	0.0396	AF	negative
										A10_Methanosaeta	B714_uncultured bacterium	-0.79	0.0099	AB	negative
										A51_Methanosaeta	B368_Alsobacter	0.6319	0.0198	AB	positive
										A58_Methanobacterium	B1284_Pir2 lineage	0.7561	0.0197	AB	positive
										A93_Methanosarcina	B392_Spirochaeta 2	0.7182	0.0137	AB	positive
										B260_Anaeromyxobacter	A17_Methanobacterium	-0.707	0.0198	AB	negative
										B1433_uncultured bacterium	A17_Methanobacterium	-0.6633	0.0198	AB	negative
										B441_Hydrogenispora	A17_Methanobacterium	0.7793	0.0099	AB	positive
										B883_uncultured soil bacterium PBS-III-30	A17_Methanobacterium	0.6683	0.0198	AB	positive
										B13_Methylocystis	A17_Methanobacterium	-0.7018	0.0297	AB	negative
										B487_f_Holophagaceae	A17_Methanobacterium	0.7956	0.0198	AB	positive
										B45_f_Blastocatellaceae	A17_Methanobacterium	-0.6211	0.0495	AB	negative
										F1859_unidentified	A17_Methanobacterium	0.6774	0.0198	AF	positive
										F370_o_NA	A17_Methanobacterium	0.6955	0.0495	AF	positive
										F2724_o_NA	A17_Methanobacterium	-0.677	0.0297	AF	negative
										B1856_uncultured Bacteroidetes bacterium	A17_Methanobacterium	0.7007	0.0099	AB	positive
										B139_uncultured Iamiaceae bacterium	A17_Methanobacterium	0.6816	0.0297	AB	positive
										B296_IS-44	A17_Methanobacterium	-0.6736	0.0396	AB	negative
										A4_Methanosaeta	A17_Methanobacterium	-0.6437	0.0396	A	negative
										B436_f_Lentimicrobiaceae	A17_Methanobacterium	-0.684	0.0297	AB	negative
										A27_Methanosaeta	A17_Methanobacterium	0.6414	0.0396	A	positive
										B849_Clostridium sensu stricto 13	A17_Methanobacterium	0.7324	0.0297	AB	positive
										B391_uncultured Sorangiineae bacterium	A17_Methanobacterium	0.7496	0.0495	AB	positive
										A14_Candidatus Nitrosotalea	A17_Methanobacterium	-0.7361	0.0297	A	negative
										B397_Reyranella	A17_Methanobacterium	-0.6164	0.0396	AB	negative
										B447_wastewater metagenome	A17_Methanobacterium	0.7061	0.0297	AB	positive
										B2929_Candidatus Omnitrophus	A17_Methanobacterium	0.6383	0.0396	AB	positive
										B472_alphaI cluster	A17_Methanobacterium	0.6969	0.0198	AB	positive
										B596_Massilia	A17_Methanobacterium	-0.7315	0.0297	AB	negative
										B446_uncultured delta proteobacterium	A17_Methanobacterium	0.7185	0.0198	AB	positive
										B383_Massilia	A17_Methanobacterium	0.6296	0.0495	AB	positive
										F737_unidentified	A17_Methanobacterium	-0.7111	0.0396	AF	negative
										F1235_o_NA	A17_Methanobacterium	-0.6699	0.0099	AF	negative
										A58_Methanobacterium	B1057_Rhizomicrobium	0.7715	0.0098	AB	positive
										A58_Methanobacterium	B22_uncultured bacterium	-0.619	0.0396	AB	negative
										A125_Methanosaeta	B22_uncultured bacterium	0.6138	0.0396	AB	positive
										A93_Methanosarcina	B735_Anaeromyxobacter	0.7067	0.005	AB	positive
										A59_Methanocella	B95_o_RCP2-54	-0.7476	0.0495	AB	negative
										A125_Methanosaeta	B205_uncultured	0.6506	0.0396	AB	positive
										A125_Methanosaeta	B363_uncultured bacterium	-0.7274	0.0396	AB	negative
										A93_Methanosarcina	A53_uncultured euryarchaeote	0.6382	0.019	A	positive
										A125_Methanosaeta	A45_o_NA	0.6357	0.0388	A	positive
										A101_Methanosaeta	B4221_uncultured eubacterium WCHB1-50	0.6601	0.0235	AB	positive
										A36_Methanosarcina	B4221_uncultured eubacterium WCHB1-50	0.737	0.0137	AB	positive
										A101_Methanosaeta	B3039_Syntrophobacter	0.7544	0.0137	AB	positive
										A36_Methanosarcina	B3039_Syntrophobacter	0.7624	0.0235	AB	positive
										A42_Methanosarcina	B104_f_uncultured	-0.6908	0.0297	AB	negative
										A125_Methanosaeta	B104_f_uncultured	-0.6652	0.0396	AB	negative
										A66_Methanosaeta	B466_Desulfobacca	0.6893	0.005	AB	positive
										A51_Methanosaeta	B72_Desulfobacca	-0.9099	0.0198	AB	negative
										A127_Methanosaeta	B1146_metagenome	0.6165	0.0137	AB	positive
										A59_Methanocella	B4003_uncultured	0.6232	0.0235	AB	positive
										A51_Methanosaeta	B799_o_NA	0.8335	0.0098	AB	positive
										A127_Methanosaeta	B198_o_NA	0.7041	0.0235	AB	positive
										A127_Methanosaeta	B2738_Clostridium sensu stricto 6	0.6357	0.005	AB	positive
										A44_Methanosaeta	B166_uncultured bacterium	0.656	0.0297	AB	positive
										A10_Methanosaeta	B166_uncultured bacterium	0.7518	0.0198	AB	positive
										A59_Methanocella	B2433_f_Clostridiaceae 1	0.7402	0.005	AB	positive
										A61_Methanosaeta	B2697_uncultured bacterium	0.7003	0.0098	AB	positive
										A93_Methanosarcina	B2135_Clostridium sensu stricto 12	0.7507	0.005	AB	positive
										A101_Methanosaeta	B7964_Pelosinus	0.6847	0.005	AB	positive
										A36_Methanosarcina	B7964_Pelosinus	0.6557	0.0235	AB	positive
										A101_Methanosaeta	B3791_uncultured prokaryote	0.6806	0.0137	AB	positive
										A36_Methanosarcina	B3791_uncultured prokaryote	0.6907	0.005	AB	positive
										A58_Methanobacterium	B1433_uncultured bacterium	0.7043	0.0198	AB	positive
										A127_Methanosaeta	B272_uncultured Chlorobi bacterium	0.6929	0.005	AB	positive
										A127_Methanosaeta	B2214_Anaerobacterium	0.6597	0.0137	AB	positive
										A58_Methanobacterium	B320_Gemmatimonas	0.6355	0.0198	AB	positive
										A125_Methanosaeta	B1232_f_Burkholderiaceae	0.6854	0.0297	AB	positive
										A93_Methanosarcina	B1052_uncultured compost bacterium	0.6871	0.0137	AB	positive
										A61_Methanosaeta	B419_uncultured Desulfuromonadales bacterium	0.6518	0.0396	AB	positive
										A42_Methanosarcina	B419_uncultured Desulfuromonadales bacterium	0.6776	0.0198	AB	positive
										A66_Methanosaeta	B3682_Clostridium sensu stricto 8	0.7046	0.005	AB	positive
										A125_Methanosaeta	B804_Oryzihumus	0.704	0.0099	AB	positive
										A19_Methanocella	B1278_o_NA	0.6854	0.0099	AB	positive
										A19_Methanocella	B797_Bacteriovorax	0.6866	0.0297	AB	positive
										A125_Methanosaeta	B1449_f_Rhodocyclaceae	0.7948	0.0098	AB	positive
										A127_Methanosaeta	B4719_f_Burkholderiaceae	0.7175	0.0137	AB	positive
										A51_Methanosaeta	B954_Geobacter	0.876	0.0098	AB	positive
										A101_Methanosaeta	B3111_Ferruginibacter	0.6654	0.0235	AB	positive
										A36_Methanosarcina	B3111_Ferruginibacter	0.6315	0.0235	AB	positive
										A127_Methanosaeta	A92_Methanomassiliicoccus	0.8103	0.005	A	positive
										A51_Methanosaeta	B326_f_Burkholderiaceae	0.8575	0.0098	AB	positive
										A59_Methanocella	B906_f_SC-I-84	0.6359	0.0091	AB	positive
										A4_Methanosaeta	B170_uncultured Planctomycetales bacterium	-0.6728	0.0099	AB	negative
										A27_Methanosaeta	B170_uncultured Planctomycetales bacterium	0.6769	0.0297	AB	positive
										A70_Methanosarcina	B170_uncultured Planctomycetales bacterium	-0.7226	0.0297	AB	negative
										A42_Methanosarcina	B1083_Dinghuibacter	0.7723	0.0197	AB	positive
										A93_Methanosarcina	B1757_uncultured bacterium	0.6979	0.0137	AB	positive
										A101_Methanosaeta	B1102_Bryobacter	0.7191	0.0137	AB	positive
										A36_Methanosarcina	B1102_Bryobacter	0.7108	0.005	AB	positive
										A127_Methanosaeta	B654_uncultured	-0.611	0.0396	AB	negative
										A10_Methanosaeta	B654_uncultured	-0.6937	0.0297	AB	negative
										A101_Methanosaeta	B9936_uncultured	0.604	0.005	AB	positive
										A36_Methanosarcina	B9936_uncultured	0.6364	0.0433	AB	positive
										A10_Methanosaeta	B271_Anaerolinea	0.7415	0.0099	AB	positive
										A127_Methanosaeta	B1890_o_RBG-13-54-9	0.6886	0.0137	AB	positive
										A10_Methanosaeta	B668_o_NA	0.7024	0.0198	AB	positive
										A4_Methanosaeta	B51_f_uncultured	0.6514	0.0495	AB	positive
										A44_Methanosaeta	B51_f_uncultured	-0.7354	0.0099	AB	negative
										A10_Methanosaeta	B51_f_uncultured	-0.8254	0.0099	AB	negative
										A80_Methanosarcina	B51_f_uncultured	-0.77	0.0198	AB	negative
										A127_Methanosaeta	B539_o_Subgroup 13	0.6459	0.0137	AB	positive
										A12_Methanobacterium	B242_Nakamurella	-0.7543	0.0099	AB	negative
										A29_Methanosaeta	B1624_o_uncultured	-0.6038	0.0297	AB	negative
										A70_Methanosarcina	B1584_f_Lachnospiraceae	-0.6892	0.0198	AB	negative
										A101_Methanosaeta	B1265_Geobacter	0.7634	0.0137	AB	positive
										A36_Methanosarcina	B1265_Geobacter	0.7831	0.0137	AB	positive
										A80_Methanosarcina	B5_Sideroxydans	-0.6516	0.0297	AB	negative
										A4_Methanosaeta	B82_ADurb.Bin063-1	-0.7461	0.0099	AB	negative
										A27_Methanosaeta	B82_ADurb.Bin063-1	0.68	0.0198	AB	positive
										A44_Methanosaeta	B82_ADurb.Bin063-1	0.8398	0.0197	AB	positive
										A80_Methanosarcina	B82_ADurb.Bin063-1	0.8521	0.0098	AB	positive
										A10_Methanosaeta	B2223_uncultured bacterium	0.6806	0.0297	AB	positive
										A127_Methanosaeta	B993_o_Gaiellales	0.7192	0.005	AB	positive
										A10_Methanosaeta	B1596_uncultured proteobacterium	0.6757	0.0396	AB	positive
										A10_Methanosaeta	B697_f_SC-I-84	0.6854	0.0495	AB	positive
										A19_Methanocella	F832_o_NA	0.6176	0.0396	AF	positive
										A93_Methanosarcina	B2740_Anaerolinea	0.6218	0.0388	AB	positive
										A4_Methanosaeta	B2740_Anaerolinea	-0.6451	0.0495	AB	negative
										A27_Methanosaeta	B2740_Anaerolinea	0.6699	0.0495	AB	positive
										A4_Methanosaeta	B909_o_uncultured	0.735	0.0297	AB	positive
										A27_Methanosaeta	B909_o_uncultured	-0.7027	0.0198	AB	negative
										A10_Methanosaeta	B909_o_uncultured	-0.6004	0.0396	AB	negative
										A58_Methanobacterium	B626_Flavobacterium	0.8306	0.0197	AB	positive
										A93_Methanosarcina	B1179_Desulfobacca	0.703	0.0137	AB	positive
										A66_Methanosaeta	B178_Geobacter	0.6933	0.0235	AB	positive
										A51_Methanosaeta	B1319_Syntrophorhabdus	0.6263	0.0396	AB	positive
										A125_Methanosaeta	B1831_uncultured soil bacterium	0.7675	0.0098	AB	positive
										A12_Methanobacterium	B56_uncultured prokaryote	-0.6999	0.0297	AB	negative
										A101_Methanosaeta	F1299_unidentified	0.657	0.0137	AF	positive
										A36_Methanosarcina	F1299_unidentified	0.6134	0.0433	AF	positive
										A101_Methanosaeta	B1570_Clostridium sensu stricto 10	0.6289	0.019	AB	positive
										A36_Methanosarcina	B1570_Clostridium sensu stricto 10	0.6044	0.0289	AB	positive
										A58_Methanobacterium	B1570_Clostridium sensu stricto 10	0.8177	0.0098	AB	positive
										A59_Methanocella	B4087_Clostridium sensu stricto 12	0.7029	0.005	AB	positive
										A66_Methanosaeta	B1042_uncultured	0.675	0.005	AB	positive
										A93_Methanosarcina	B4755_Pseudolabrys	0.7536	0.005	AB	positive
										A4_Methanosaeta	B1474_Anaeromyxobacter	-0.6646	0.0198	AB	negative
										A27_Methanosaeta	B1474_Anaeromyxobacter	0.6822	0.0297	AB	positive
										A127_Methanosaeta	B1486_Arenimonas	0.6546	0.005	AB	positive
										A29_Methanosaeta	B487_f_Holophagaceae	0.7471	0.0297	AB	positive
										A10_Methanosaeta	B408_uncultured Hyphomicrobiaceae bacterium	0.6431	0.0495	AB	positive
										A61_Methanosaeta	B176_Phenylobacterium	-0.7015	0.0297	AB	negative
										A42_Methanosarcina	B176_Phenylobacterium	-0.6966	0.0297	AB	negative
										A93_Methanosarcina	B3577_uncultured Syntrophobacteraceae bacterium	0.6952	0.0137	AB	positive
										A59_Methanocella	B103_Porphyrobacter	-0.8673	0.0099	AB	negative
										A42_Methanosarcina	B103_Porphyrobacter	-0.6076	0.0396	AB	negative
										A29_Methanosaeta	B172_Syntrophobacter	-0.6094	0.0495	AB	negative
										A93_Methanosarcina	B1010_Anaeromyxobacter	0.7574	0.005	AB	positive
										A10_Methanosaeta	B112_Massilia	-0.6372	0.0495	AB	negative
										A127_Methanosaeta	B1604_Ramlibacter	0.7709	0.0137	AB	positive
										A10_Methanosaeta	B299_uncultured	0.89	0.0099	AB	positive
										A29_Methanosaeta	A26_uncultured Methanomicrobiales archaeon	-0.6686	0.0198	A	negative
										A127_Methanosaeta	B2461_f_Burkholderiaceae	0.6597	0.0334	AB	positive
										A101_Methanosaeta	B2746_Gaiella	0.7152	0.0137	AB	positive
										A36_Methanosarcina	B2746_Gaiella	0.708	0.0137	AB	positive
										A36_Methanosarcina	B511_uncultured Conexibacter sp.	0.6232	0.0137	AB	positive
										A101_Methanosaeta	B1512_ADurb.Bin063-1	0.6729	0.0235	AB	positive
										A36_Methanosarcina	B1512_ADurb.Bin063-1	0.7285	0.005	AB	positive
										A127_Methanosaeta	B2050_Conexibacter	0.6444	0.005	AB	positive
										A4_Methanosaeta	B45_f_Blastocatellaceae	0.9339	0.0099	AB	positive
										A27_Methanosaeta	B45_f_Blastocatellaceae	-0.9161	0.0099	AB	negative
										A44_Methanosaeta	B45_f_Blastocatellaceae	-0.7089	0.0198	AB	negative
										A80_Methanosarcina	B45_f_Blastocatellaceae	-0.73	0.0198	AB	negative
										A59_Methanocella	B2955_Smithella	0.6878	0.0137	AB	positive
										A59_Methanocella	B3512_o_NA	0.6246	0.0433	AB	positive
										A59_Methanocella	B350_uncultured	0.7502	0.005	AB	positive
										A42_Methanosarcina	B1608_uncultured	0.7491	0.0197	AB	positive
										A101_Methanosaeta	B1106_uncultured	0.6882	0.0235	AB	positive
										A36_Methanosarcina	B1106_uncultured	0.7128	0.005	AB	positive
										A101_Methanosaeta	B31_metagenome	-0.6213	0.0495	AB	negative
										A36_Methanosarcina	B31_metagenome	-0.6283	0.0396	AB	negative
										A59_Methanocella	B1062_uncultured Chloroflexi bacterium	0.7252	0.0137	AB	positive
										A61_Methanosaeta	B5220_f_uncultured	0.6192	0.0289	AB	positive
										A93_Methanosarcina	B859_f_uncultured	0.6736	0.005	AB	positive
										A101_Methanosaeta	F6176_o_NA	0.6066	0.0137	AF	positive
										A10_Methanosaeta	F1249_unidentified	0.6382	0.0198	AF	positive
										A19_Methanocella	F1334_unidentified	-0.6037	0.0297	AF	negative
										A125_Methanosaeta	F676_unidentified	-0.805	0.0099	AF	negative
										A10_Methanosaeta	F69_o_NA	-0.8738	0.0099	AF	negative
										A51_Methanosaeta	B1553_Aquicella	0.6497	0.0099	AB	positive
										A10_Methanosaeta	B2073_bacterium UW 659-2-F09	0.6344	0.0198	AB	positive
										A101_Methanosaeta	B10201_o_Myxococcales	0.6255	0.005	AB	positive
										A36_Methanosarcina	B10201_o_Myxococcales	0.6199	0.0433	AB	positive
										A66_Methanosaeta	A846_o_NA	0.6655	0.005	A	positive
										A66_Methanosaeta	B7690_o_NA	0.752	0.0137	AB	positive
										A51_Methanosaeta	A112_o_NA	0.8915	0.0098	A	positive
										A66_Methanosaeta	F158_o_NA	-0.6366	0.0396	AF	negative
										A44_Methanosaeta	F158_o_NA	-0.7253	0.0396	AF	negative
										A80_Methanosarcina	F158_o_NA	-0.7206	0.0198	AF	negative
										A51_Methanosaeta	B1105_uncultured bacterium	-0.6761	0.0198	AB	negative
										A93_Methanosarcina	B4343_f_Lentimicrobiaceae	0.7024	0.0137	AB	positive
										A58_Methanobacterium	F742_o_NA	0.6603	0.0198	AF	positive
										A59_Methanocella	F136_Spirosphaera	0.6757	0.0198	AF	positive
										A42_Methanosarcina	F136_Spirosphaera	0.6861	0.0099	AF	positive
										A125_Methanosaeta	B3861_Geobacter	0.6179	0.0198	AB	positive
										F330_unidentified	A101_Methanosaeta	0.7427	0.0137	AF	positive
										B150_f_Micrococcaceae	A101_Methanosaeta	-0.7717	0.0297	AB	negative
										B83_uncultured	A101_Methanosaeta	0.7275	0.0137	AB	positive
										B497_uncultured	A101_Methanosaeta	-0.8431	0.0297	AB	negative
										B7428_o_Subgroup 7	A101_Methanosaeta	0.6355	0.005	AB	positive
										A301_archaeon GW2011_AR15	A101_Methanosaeta	0.7214	0.0137	A	positive
										B630_Candidatus Solibacter	A101_Methanosaeta	0.6728	0.0137	AB	positive
										B1767_uncultured Holophaga sp.	A101_Methanosaeta	0.6394	0.0334	AB	positive
										B338_Haliangium	A101_Methanosaeta	0.716	0.0137	AB	positive
										B7740_Tomitella	A101_Methanosaeta	0.6617	0.0137	AB	positive
										B908_f_Archangiaceae	A101_Methanosaeta	0.6573	0.0137	AB	positive
										A36_Methanosarcina	A101_Methanosaeta	0.8228	0.0235	A	positive
										A15_unidentified archaeon	A101_Methanosaeta	0.8416	0.0235	A	positive
										B1582_o_NA	A101_Methanosaeta	0.6927	0.0137	AB	positive
										B10_f_Xanthobacteraceae	A101_Methanosaeta	0.6211	0.0388	AB	positive
										F212_Penicillium	A101_Methanosaeta	0.6023	0.0137	AF	positive
										B9038_uncultured soil bacterium	A101_Methanosaeta	0.68	0.0137	AB	positive
										B7475_Phenylobacterium	A101_Methanosaeta	0.7005	0.0235	AB	positive
										B5767_Aquicella	A101_Methanosaeta	0.6415	0.0137	AB	positive
										B3338_uncultured	A101_Methanosaeta	0.6546	0.0137	AB	positive
										B6524_f_uncultured	A101_Methanosaeta	0.6422	0.0137	AB	positive
										B1234_Syntrophus	A101_Methanosaeta	0.7036	0.0433	AB	positive
										B5162_metagenome	A101_Methanosaeta	0.6119	0.005	AB	positive
										B1691_f_SC-I-84	A101_Methanosaeta	0.7424	0.0137	AB	positive
										B3761_f_Pedosphaeraceae	A101_Methanosaeta	0.6679	0.0137	AB	positive
										B2782_Pedobacter	A101_Methanosaeta	0.6334	0.0289	AB	positive
										B2644_Pseudomonas	A101_Methanosaeta	0.6249	0.0388	AB	positive
										B470_f_uncultured	A101_Methanosaeta	0.6844	0.005	AB	positive
										B3579_uncultured	A101_Methanosaeta	0.6863	0.0235	AB	positive
										B2851_Acidibacter	A101_Methanosaeta	0.6531	0.0137	AB	positive
										B3830_uncultured soil bacterium	A101_Methanosaeta	0.6598	0.005	AB	positive
										B40_f_Nocardioidaceae	A101_Methanosaeta	0.6846	0.0137	AB	positive
										B1555_Mucilaginibacter	A101_Methanosaeta	0.6614	0.0137	AB	positive
										B1415_Desulfobulbus	A101_Methanosaeta	0.6063	0.0235	AB	positive
										B510_Candidatus Solibacter	A101_Methanosaeta	0.7124	0.005	AB	positive
										B221_Nocardioides	A101_Methanosaeta	0.6239	0.0137	AB	positive
										B426_Kineosporia	A101_Methanosaeta	0.6238	0.0235	AB	positive
										B393_uncultured	A101_Methanosaeta	0.6891	0.0137	AB	positive
										B583_Polaromonas	A101_Methanosaeta	0.6794	0.0433	AB	positive
										B4009_Bacillus	A101_Methanosaeta	0.6902	0.0137	AB	positive
										B285_f_Burkholderiaceae	A101_Methanosaeta	0.6148	0.019	AB	positive
										A9_Methanoregula	A101_Methanosaeta	0.7818	0.0297	A	positive
										B3775_Pseudorhodoplanes	A101_Methanosaeta	0.7103	0.005	AB	positive
										B3171_Desulfosporosinus	A101_Methanosaeta	0.6031	0.0137	AB	positive
										B12312_Devosia	A101_Methanosaeta	0.6021	0.0235	AB	positive
										B504_Ramlibacter	A101_Methanosaeta	0.7387	0.0137	AB	positive
										B2470_Dactylosporangium	A101_Methanosaeta	0.6438	0.0235	AB	positive
										B7400_Sphingobacterium	A101_Methanosaeta	0.6556	0.0137	AB	positive
										B9382_bacterium Ellin6089	A101_Methanosaeta	0.6558	0.005	AB	positive
										A560_Methanomassiliicoccus	A101_Methanosaeta	0.7351	0.0137	A	positive
										B246_uncultured Rhodocyclaceae bacterium	A101_Methanosaeta	0.6312	0.0099	AB	positive
										B319_Pseudomonas	A101_Methanosaeta	0.7029	0.0137	AB	positive
										B7320_f_Rhizobiaceae	A101_Methanosaeta	0.6439	0.0235	AB	positive
										B185_f_Micrococcaceae	A101_Methanosaeta	-0.821	0.0099	AB	negative
[truncated: 743 more rows]

## Sheet: YS2
Edge of methanogen and bacterial functional groups										Edge of methanogens
[truncated: 1,144 more rows]

[truncated: 4 more sheets: MY1, MY2, NJ1, NJ2]
